# Supplementary material for: Ezrin defines TSC complex activation at endosomal compartments through EGFR–AKT signaling
Source: eLife journal article supplement (doi:10.7554/elife.98523), 2024-08-08

Figure Supplementary 1 h

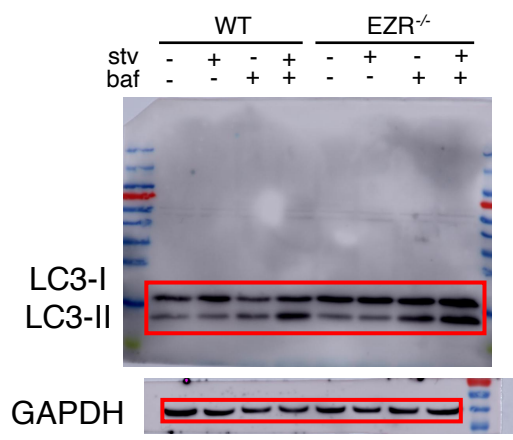

Figure Supplementary 1 i

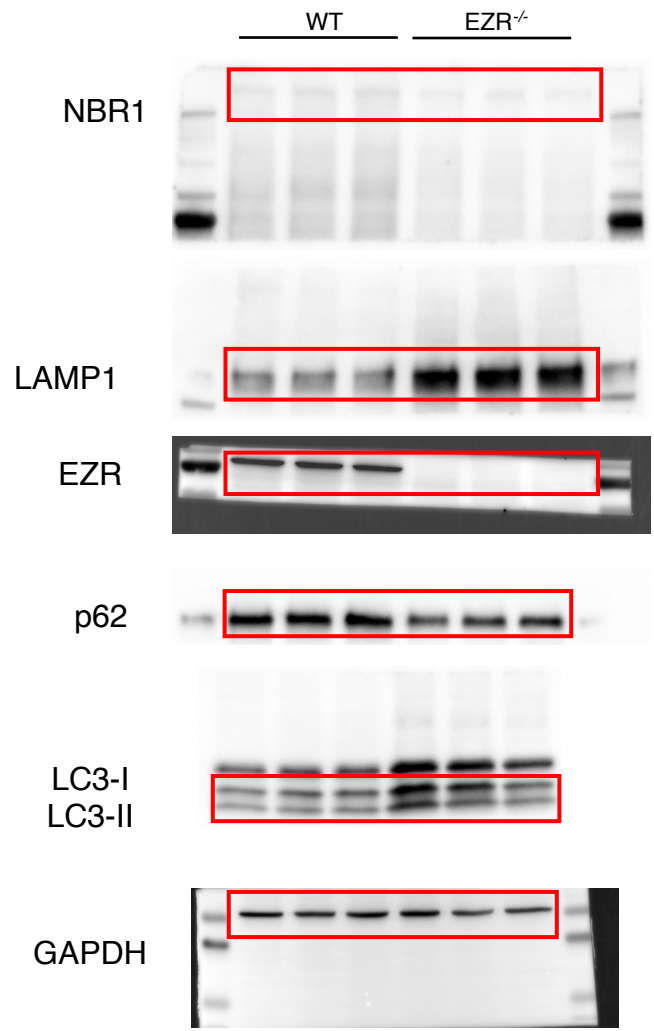

Supplement: fig1-figsupp1-data1 [file elife-98523-fig1-figsupp1-data1-v1.zip]
