# Supplementary material for: Ezrin defines TSC complex activation at endosomal compartments through EGFR–AKT signaling
Source: eLife journal article supplement (doi:10.7554/elife.98523), 2024-08-08

**Figure 2 d**

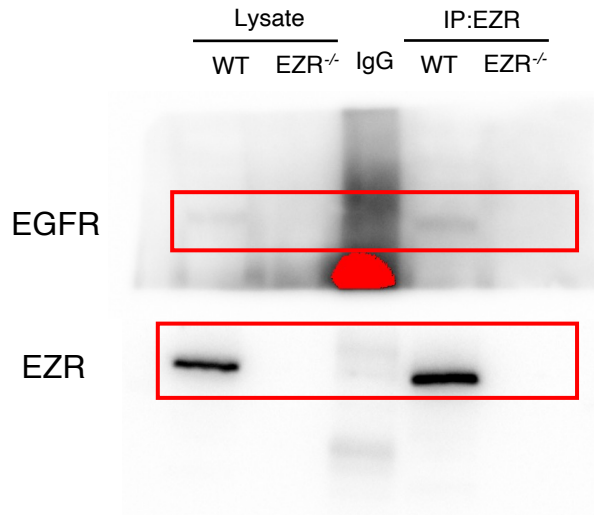

**Figure 2 i**

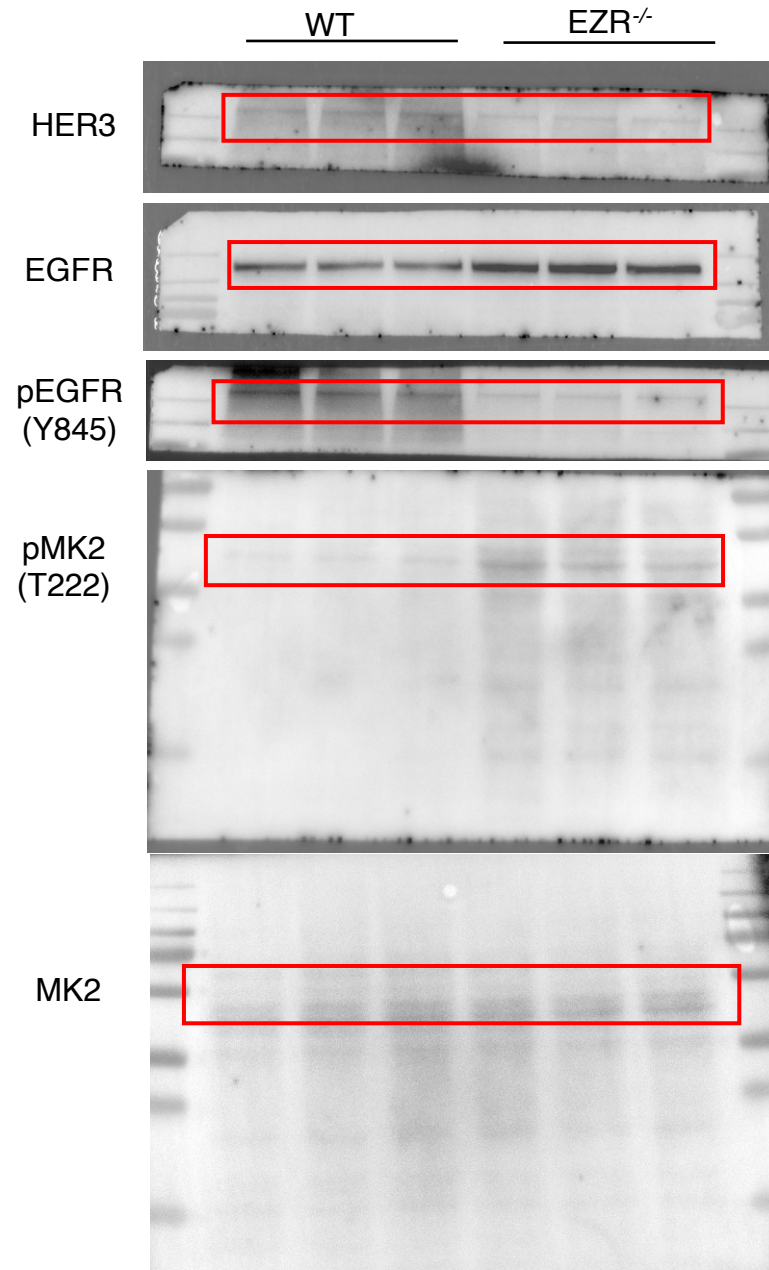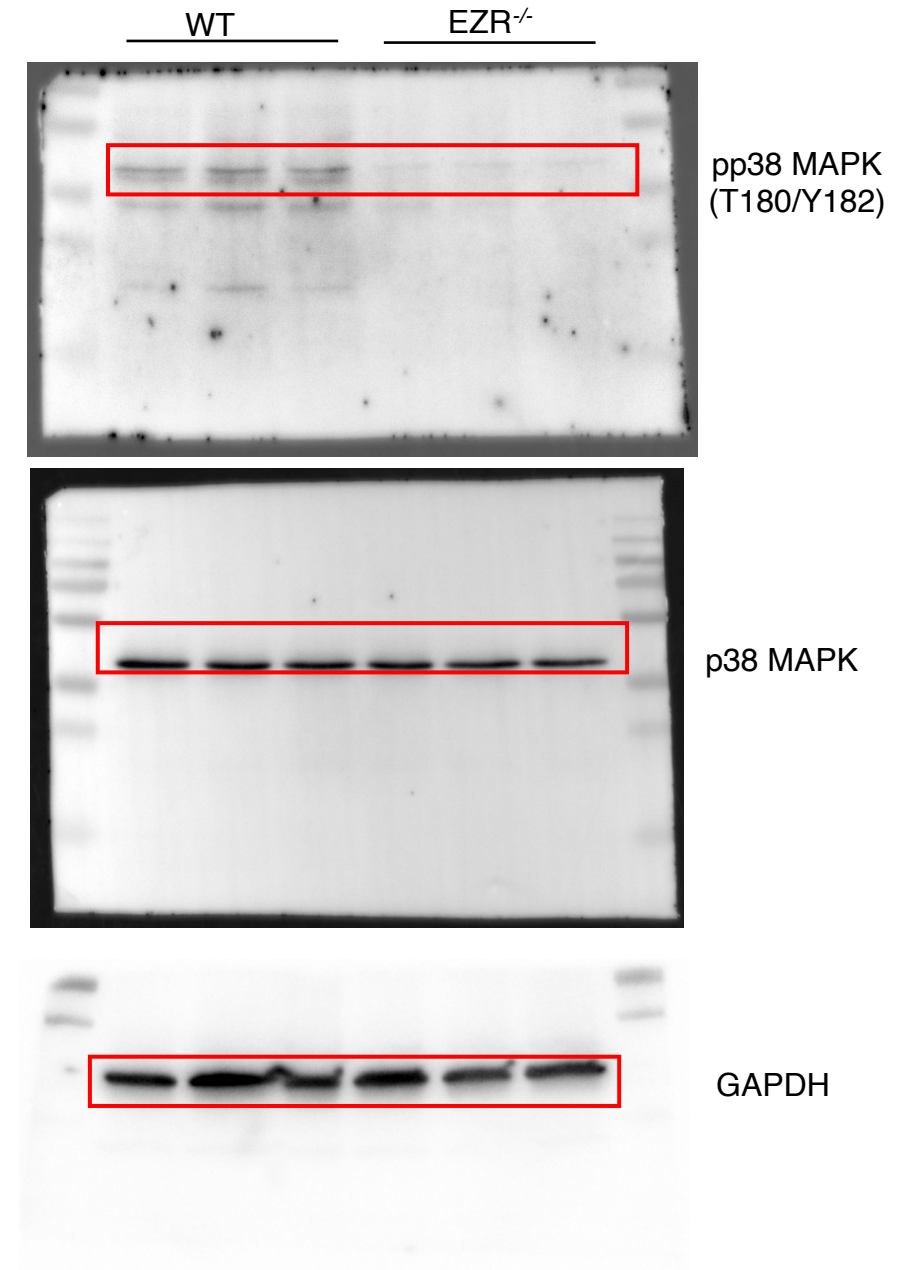

**Figure 2 e**

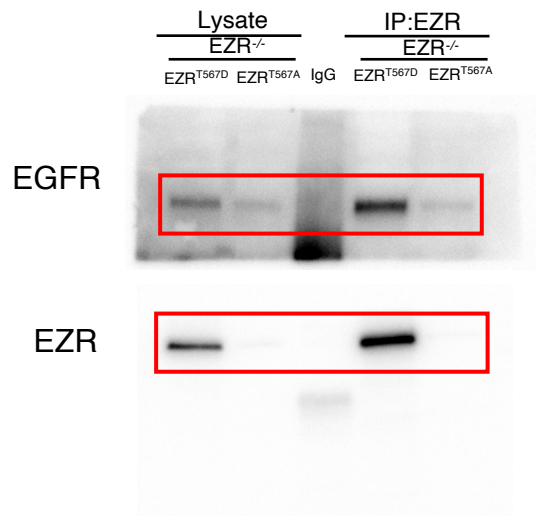

Supplement: fig2-data1 [file elife-98523-fig2-data1-v1.zip]
