# Supplementary material for: Ezrin defines TSC complex activation at endosomal compartments through EGFR–AKT signaling
Source: eLife journal article supplement (doi:10.7554/elife.98523), 2024-08-08

**Figure 5 c**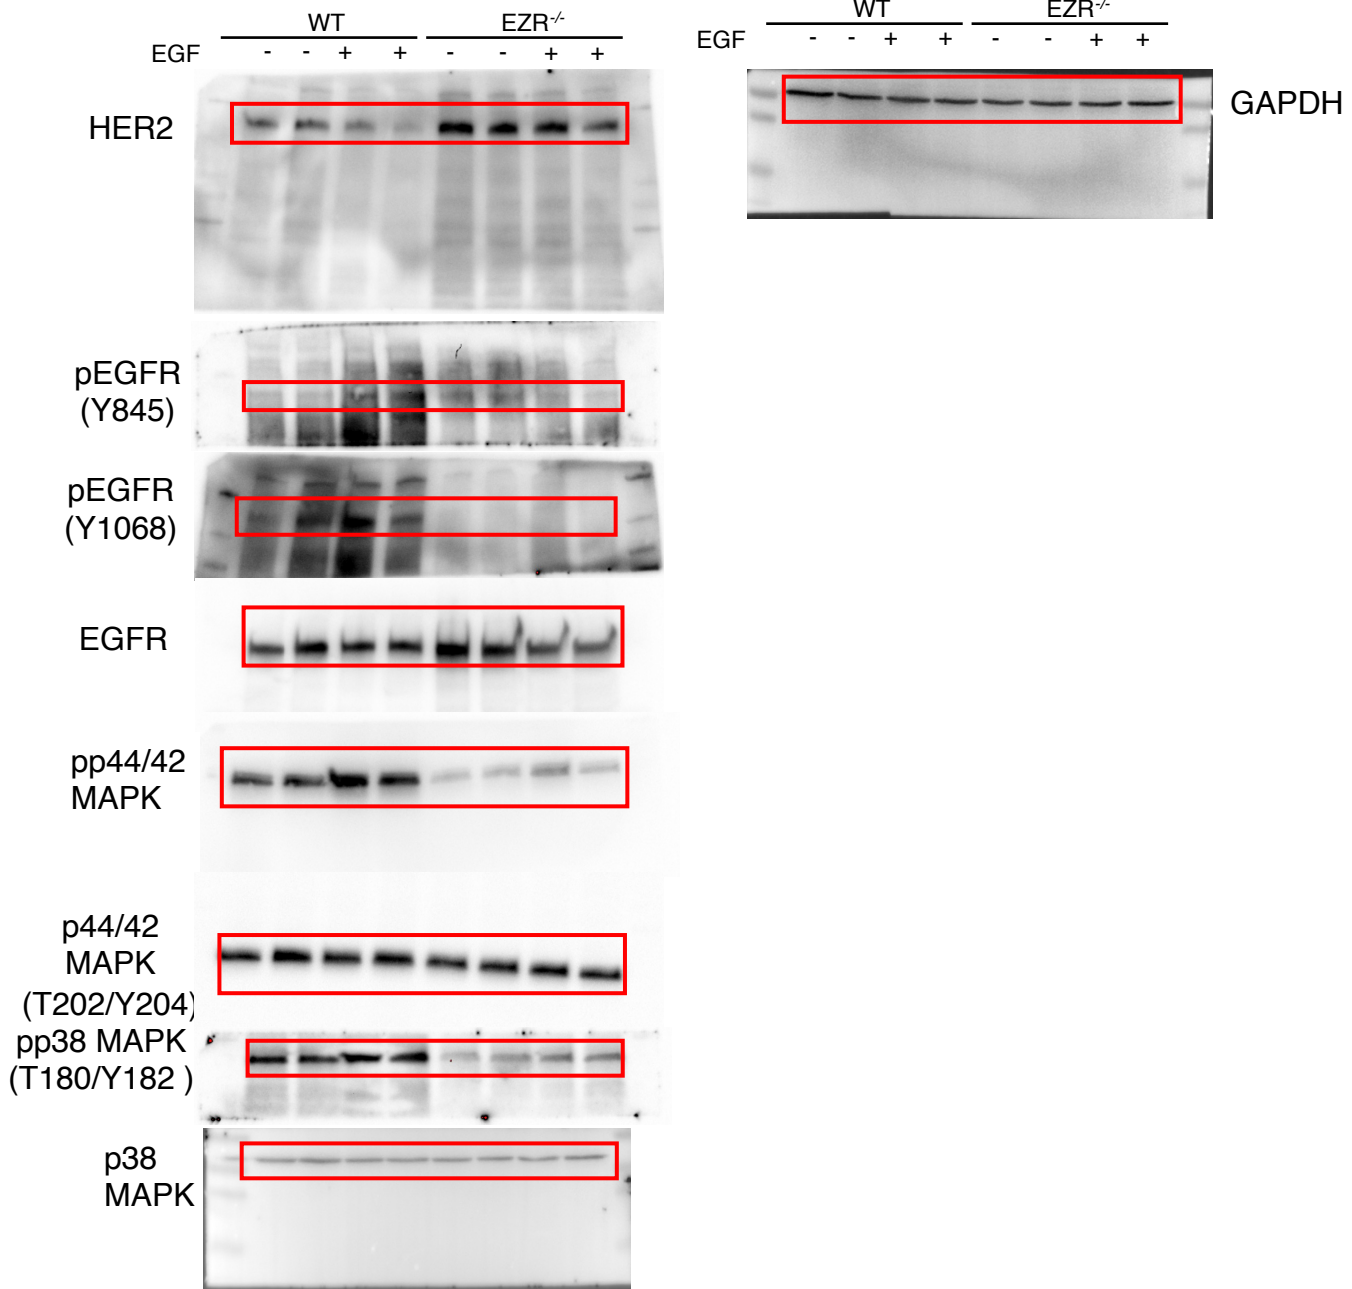**Figure 5 d**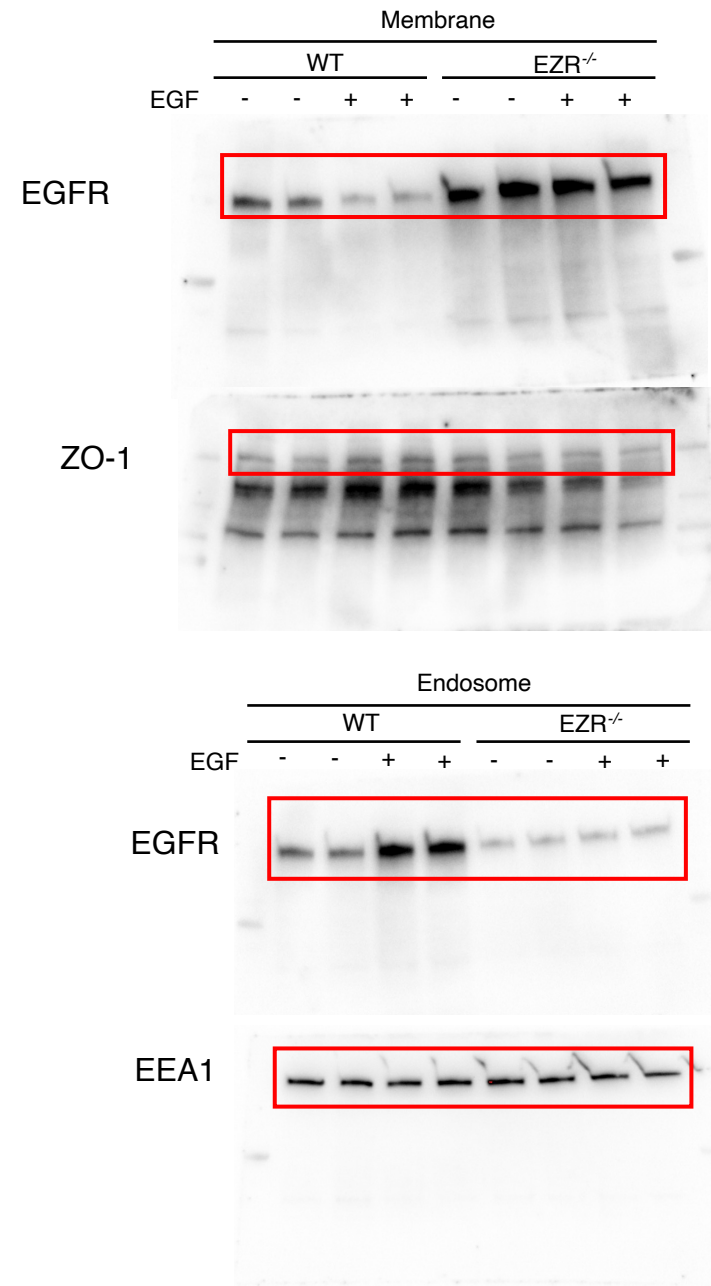

Supplement: fig5-data1 [file elife-98523-fig5-data1-v1.zip]
