# Supplementary material for: Ezrin defines TSC complex activation at endosomal compartments through EGFR–AKT signaling
Source: eLife journal article supplement (doi:10.7554/elife.98523), 2024-08-08

Figure Supplementary 6 b

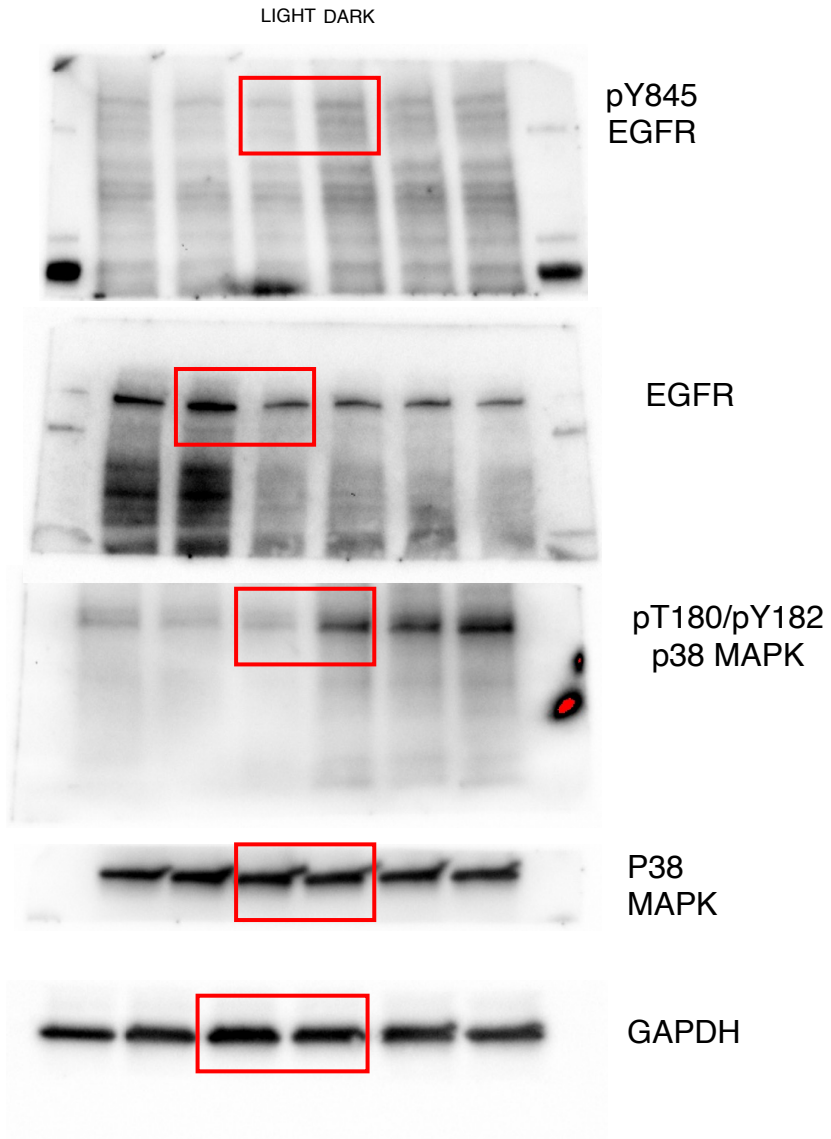

Figure Supplementary 6 c

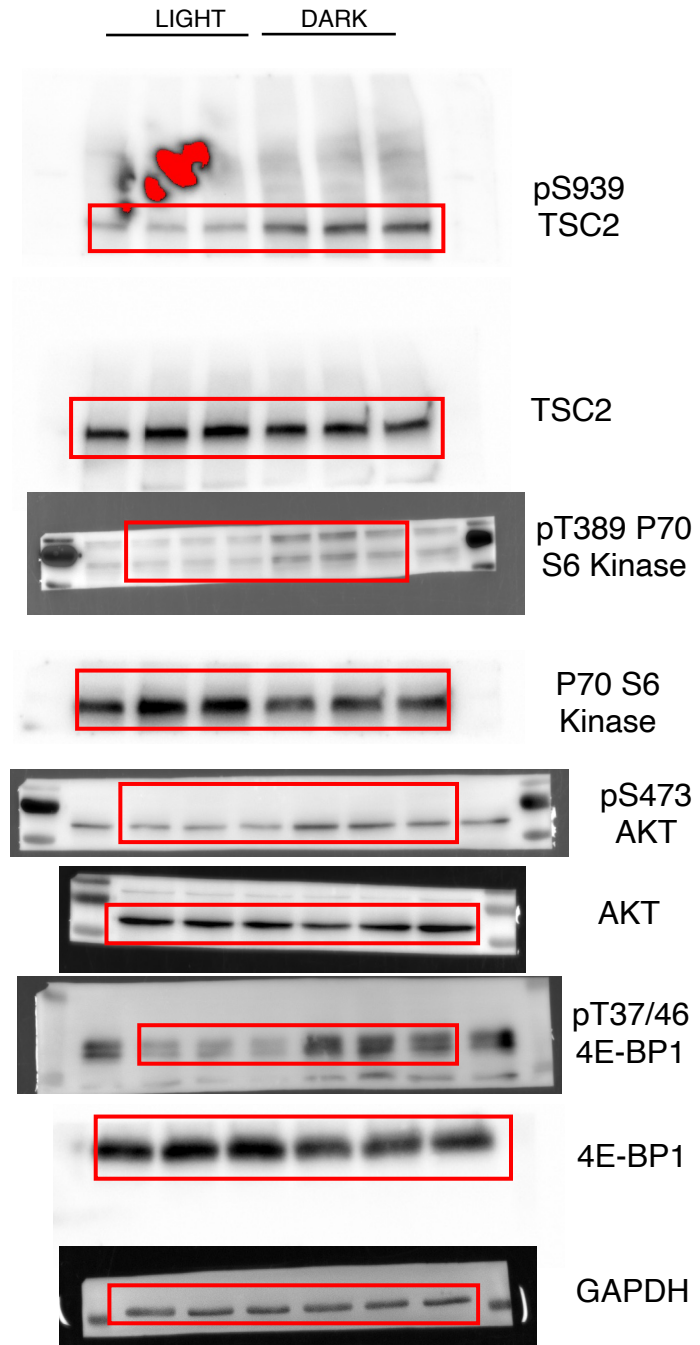

Supplement: fig7-figsupp1-data2 [file elife-98523-fig7-figsupp1-data2-v1.pdf]
