# Supplementary material for: Ezrin defines TSC complex activation at endosomal compartments through EGFR–AKT signaling
Source: eLife. 2025 Feb 12;13:RP98523. doi: 10.7554/eLife.98523 (PMC11820125; doi:10.7554/eLife.98523)
Supplement: Supplementary file 1. [file elife-98523-supp1.xlsx]

## Sheet: proteomics
KO1	KO2	KO3	KO4	WT1	WT2	WT3	WT4	Student's T-test Difference KOvsWT	Gene names
33.2351	31.6137	31.4511	32.6309	22.1838	24.4892	21.7369	22.3109	9.55247	Mme
32.8012	33.46	33.1187	33.0013	25.2342	25.0601	23.6822	22.6616	8.93576	Sqrdl
31.622	31.6504	31.6092	31.7224	24.223	22.7211	22.3511	23.3525	8.48905	Hspb1
30.4936	30.7133	32.0762	32.0546	23.38	25.622	22.9334	23.6942	7.42698	Cnn1
31.2166	31.9968	31.48	31.711	24.895	24.583	24.3022	23.3308	7.32337	Enpep
30.7853	31.429	30.6438	31.0888	24.9997	23.0892	23.3813	24.0492	7.10691	Cth
31.8553	30.9633	30.7231	30.862	24.8051	26.2589	23.8579	21.7405	6.93536	Ptgis
31.6851	31.3778	29.7469	31.0298	25.5238	23.5875	23.0162	25.2886	6.60587	Serpinb1a
31.4977	33.3189	31.4146	31.5264	25.4667	25.3345	26.9683	23.7274	6.56518	Fam129a
30.2562	30.3072	30.3726	30.3187	23.5421	24.9474	23.7398	24.1809	6.21114	Serpine2
29.5475	30.466	29.9773	30.0069	24.2509	24.0659	22.7048	24.2806	6.1739	Pdia6
31.6397	28.7343	28.8029	31.8124	23.9655	23.8928	24.8772	24.6546	5.89981	Lmod1
29.5561	29.6612	29.917	29.9915	23.0904	23.8659	23.9141	24.7688	5.87162	Emb
29.8074	29.5144	29.3672	29.7482	24.9299	23.937	23.2548	23.5603	5.6888	Pawr
29.7382	30.3348	30.215	30.2141	23.5537	24.6787	24.7193	24.8367	5.67843	Saa3
30.3601	30.5434	30.3324	30.444	25.8862	23.8974	24.7784	24.537	5.64524	C3
30.7097	30.4331	29.9982	30.7205	26.2355	23.3076	24.7277	25.0218	5.64223	Anpep
30.2888	29.7054	29.8317	30.2164	23.8136	24.774	24.3475	25.1604	5.48668	Thy1
32.5619	32.4582	32.3195	31.9421	26.6235	26.3265	27.3716	27.6334	5.33163	Nqo1
28.2761	28.0298	28.9229	28.7161	23.9132	23.0107	22.9221	23.0725	5.25658	Actg2
31.1062	30.8522	31.6802	31.6993	25.8666	26.4797	25.8385	26.2262	5.23174	Tgm2
31.9874	32.3001	31.8907	31.9673	26.6181	27.059	26.6873	27.057	5.18103	Rbp1
30.1892	30.6203	30.3485	29.9801	28.1863	24.9875	23.6237	23.8923	5.11205	Fabp4
28.7569	28.8051	28.4044	28.5386	22.165	23.1092	24.3025	24.6244	5.07598	Cald1
28.4381	29.2278	28.9769	29.3584	23.7043	23.1582	24.0064	24.9236	5.05217	Pkp2
29.1357	28.906	28.0661	28.6287	23.3094	24.9886	23.2757	23.0108	5.03797	Ugt1a6;Ugt1a6b;Ugt1a6a;Ugt1a10;Ugt1a7c;Ugt1a5;Ugt1a8;Ugt1a9;Ugt1a2;Ugt1a1
29.2139	29.2266	28.0629	29.5117	24.3168	24.0426	24.8985	23.3873	4.84248	Gas1
28.6158	28.9582	26.7879	28.599	23.246	24.2893	22.9839	23.1356	4.82653	Dcxr
29.1209	29.4517	27.9763	28.3673	25.0798	23.0996	24.4938	22.9514	4.82293	Steap4
28.1838	28.6473	28.5071	28.2008	24.4836	22.62	23.6643	23.5293	4.81044	Cxcl12
30.119	29.1853	27.7922	29.0319	23.1416	22.9195	28.2755	23.2628	4.63223	Fyco1
27.9105	27.7155	27.7634	28.066	21.9965	23.1724	23.6861	24.4573	4.53578	Cp
30.5158	31.1385	30.4529	30.9422	25.5937	23.8773	27.864	27.689	4.50635	Ifi205a
31.8506	31.9486	31.5434	31.2668	27.1472	27.7277	27.3576	26.3961	4.49522	Ldhb
28.2046	27.9439	28.289	28.4082	24.0915	22.9517	23.7633	24.264	4.44379	Synpo
27.5307	29.2128	30.2655	28.1935	23.9097	23.9929	25.7014	23.8474	4.43778	Rbm15b
28.095	27.8477	28.038	28.8506	23.3777	22.5996	24.0564	25.4325	4.34126	Col2a1
28.4822	27.6488	27.3142	27.3899	22.7711	23.3004	23.9744	24.072	4.17931	Tpm1
27.7235	27.7965	27.5746	27.7689	23.7509	22.7849	24.6025	23.1695	4.13896	Acpp
27.3469	27.3525	27.4751	27.6321	23.5933	24.5342	22.8935	22.3592	4.10664	Ppp1r12b
31.1967	31.2626	31.1834	31.3612	27.8266	26.9793	26.7701	27.0446	4.09579	Bcat1
29.1162	28.5729	28.3009	28.9129	24.3291	24.5662	23.8641	25.8774	4.06651	Cryab
30.9883	31.288	31.0609	31.374	27.3853	27.4926	26.7873	26.8175	4.05712	Gnao1
27.5707	28.1388	27.8708	27.9527	24.3522	23.5816	24.3588	23.0704	4.04248	Lcn2
32.4473	32.9489	32.4881	32.6196	28.7596	28.5145	28.692	28.4774	4.01514	Cbr2
29.5243	30.4557	29.9183	30.0392	26.5569	24.998	26.5271	25.8375	4.00449	Cbr3
31.2054	31.3032	31.8554	31.5863	27.4924	27.8069	26.7864	27.8516	4.00324	Fhl1
27.6559	27.039	26.7125	27.3324	22.7553	22.9413	23.5257	23.6361	3.97038	Mettl7a1
28.6261	28.6114	29.2388	28.3924	26.8614	23.4532	24.832	23.8677	3.96362	Ptgs1
29.3961	28.7592	27.9423	29.7924	23.7474	25.0482	25.3828	26.0045	3.92677	Egfr
27.0331	27.1471	27.1997	27.3937	23.027	24.0582	22.7197	23.3367	3.90798	Mmp2
27.6982	28.2452	27.3046	27.9737	22.7733	24.6387	23.9913	24.2954	3.88073	Kctd12
27.4872	27.3997	27.1326	27.4218	23.7023	23.9395	23.5207	22.806	3.8682	Mgp
27.6049	27.7355	27.3671	27.3498	22.9935	24.1963	23.3735	24.1851	3.82724	Dak
29.4734	29.8562	28.818	29.3219	24.1609	26.2543	25.7924	25.9711	3.82267	Ckb
30.418	27.9151	28.0471	28.2738	25.6565	22.6888	25.9183	25.1387	3.8129	Lmo7
27.3793	27.865	27.7995	27.3297	24.5652	23.8444	22.8151	24.1767	3.74299	Ltbp2
28.2987	28.1408	27.3564	28.6686	24.8502	23.4257	25.2629	24.4048	3.63022	Ly6a
26.8954	26.9007	26.414	27.3102	22.51	23.3261	23.098	24.2175	3.59214	Foxc1
27.4556	27.2443	27.2036	28.1278	23.0697	25.6375	24.7331	22.3197	3.56784	Tmem59
27.6662	28.5053	29.2603	28.2293	27.4062	25.4993	22.8332	23.7422	3.54506	Il1f10
32.8052	33.0998	32.9846	33.2484	29.454	29.7578	30.084	28.6798	3.54062	Col12a1
27.252	27.5541	27.4049	27.3736	24.319	23.6122	23.1021	24.3946	3.53914	9030617O03Rik
28.4492	26.5364	27.2135	26.7493	23.2027	24.1546	24.1678	23.4112	3.50304	Rbpms
30.2127	29.4791	29.6602	30.1218	26.8258	26.8146	26.7729	25.0536	3.50173	Sorbs1
26.8457	26.9162	26.6047	26.5136	24.2033	23.9576	22.5973	22.1342	3.49693	1600014C10Rik
28.1229	28.2227	27.8803	26.5995	24.1077	25.6176	23.7193	23.4141	3.49167	Mgst1
28.3985	29.6171	29.6259	28.4488	26.0531	23.2819	26.3866	26.4271	3.48542	Mustn1
29.1759	28.4157	27.463	28.3791	23.4153	24.1943	26.2175	25.7729	3.4584	Fmo1
28.1113	26.9499	26.6803	26.8404	23.2065	23.3493	25.559	22.8019	3.41631	Cyp1b1
31.1851	31.205	30.5122	31.5493	27.3797	28.5189	28.2447	26.8327	3.36891	Myl9
27.4126	27.0106	27.3154	27.4753	24.4544	23.4641	24.3697	23.5973	3.33206	Sgcd
27.0587	26.9477	25.5592	26.7356	23.1168	22.4237	23.845	23.6035	3.32803	Hspb6
30.2037	30.158	29.7461	30.3555	26.2452	27.6103	27.7055	25.6297	3.31815	Rnpep
29.85	30.4113	29.399	30.5277	26.1253	27.1554	27.9838	26.178	3.1864	Tln2
29.0979	28.2396	27.8258	28.7803	25.3042	25.4233	26.0649	24.5315	3.15491	Tmem176b
28.8704	28.9346	28.8905	29.1769	26.7988	23.9202	26.1851	26.3681	3.15004
26.2713	26.1381	25.8992	26.4467	23.1556	21.677	23.9061	23.63	3.09661	Jak2
27.4989	27.355	26.9002	27.23	23.6328	23.8481	23.7292	25.4807	3.07331	Prrx2
26.8714	27.0261	25.9603	26.9437	22.4931	24.0913	23.9862	23.9641	3.06667	Rab32
26.724	26.6334	26.2539	26.4703	23.6232	24.1121	23.9296	22.1999	3.05419	Pcbd2
26.6231	27.7542	26.8295	27.3442	24.1193	23.1954	24.1774	24.8562	3.0507	Npepl1
26.3676	26.7439	26.013	26.0639	22.7942	23.325	23.4562	23.4823	3.03271	Cd248
29.7148	28.3427	27.9974	28.6959	25.6074	25.728	25.6098	25.7208	3.02122	Gpc4
26.0283	25.8547	25.9925	26.0187	22.7155	24.7927	22.898	21.4454	3.01065	BC017158
28.9053	27.9781	28.5843	27.9484	25.3607	26.1198	26.3942	23.6041	2.98428	Cspg4
29.0879	28.8805	27.7618	28.6675	26.2286	24.7525	25.1341	26.4719	2.95264	Ppap2b
27.7621	28.4778	28.17	28.4527	25.7977	23.7117	25.7365	25.8749	2.93545	Papss2
28.8375	28.366	27.4743	28.8464	25.7529	25.5944	26.5387	24.0037	2.90861	P2rx4
26.6777	26.3871	26.5383	27.5707	22.624	24.6626	25.827	22.4604	2.89997	Tgfbr3
26.7839	25.7629	25.7782	26.5594	23.3264	22.0868	23.7497	24.1278	2.89846	Actn1
30.2991	30.3382	29.6936	30.6213	28.1387	25.6466	28.0935	27.4804	2.89826	Fam3c
26.2298	27.3465	26.6278	26.9797	23.4818	24.4171	25.7136	22.1499	2.8554	Macrod1
27.7207	27.6915	28.267	28.494	24.9179	23.8824	26.3185	25.6451	2.85233	Vcan
27.3544	27.5814	27.6158	27.8635	25.3644	24.9449	24.2027	24.6731	2.80747	Prune2
26.9418	27.0728	26.7212	26.5261	23.5879	24.0201	24.2366	24.1935	2.80595	Acot1
27.2683	27.7788	27.1624	27.3319	23.5763	24.9157	25.6915	24.2335	2.78109	Scrn1
28.7992	28.9293	27.8974	28.0631	25.6107	25.9554	25.8656	25.1504	2.77671	Pbxip1
27.1308	27.2428	26.9586	27.1351	24.9395	24.0831	23.5109	24.8992	2.75864	Gfpt2
32.5554	32.5533	32.3698	32.2802	29.8514	29.5201	29.6964	29.7192	2.74287	Ephx1
26.0635	25.8539	25.6034	25.8816	22.9399	23.8963	22.4993	23.1703	2.72412	Pid1
26.3426	25.4369	25.4071	25.7762	23.0017	24.6047	22.4714	21.9963	2.72219	Slc44a2
30.1354	30.6931	30.0069	30.858	27.8475	27.6723	28.8173	26.6468	2.67739	Leprel2;P3h3
28.9403	29.5093	29.5635	29.4392	26.9877	26.1976	26.8193	26.8657	2.64548	Prkcdbp
28.745	27.476	27.175	27.4503	25.5932	23.3155	25.3482	26.0554	2.6335	Sestd1
28.1538	28.2711	26.8515	28.9471	25.6845	24.8296	25.8245	25.3925	2.62311	Aarsd1;Gm27029
28.7906	29.2125	28.6433	30.9211	26.8247	26.6656	26.7129	27.0099	2.58861	Nqo2
27.3539	26.9356	26.1309	27.2263	25.3602	24.8323	23.209	23.9277	2.57939	Il1rn
29.416	29.1352	28.8795	29.3054	26.5786	26.8679	26.9051	26.331	2.51338	Crlf1
29.277	28.8958	28.8156	28.9981	26.5318	26.6016	26.5224	26.29	2.51017	Plcd1
26.47	26.3198	25.7577	26.6393	23.59	23.225	24.9177	23.4693	2.49621	Cdkn1b
26.4628	26.3434	26.5097	26.9247	23.7	25.0936	24.7463	22.8431	2.46439
25.4774	25.3153	25.5566	26.0411	24.4476	21.97	21.9018	24.2433	2.45696	Cpne8
27.3083	27.306	26.6933	27.4417	24.2145	25.0454	25.1496	24.525	2.45372	Cpe
25.2686	26.3304	25.6995	25.7523	23.5458	23.9524	22.6103	23.256	2.42155	C1s1;C1sa
26.6285	27.6134	26.9369	27.3962	23.1498	25.6604	26.0708	24.0151	2.41972	Mxra8
27.1792	27.0097	26.6223	26.1747	24.6751	23.1442	24.7814	24.7381	2.41175	Adgrg2;Gpr64
26.556	26.6188	26.1131	26.6363	22.9387	22.6207	25.2758	25.4632	2.40643	Selo
26.7552	24.6402	25.7084	26.3188	22.5723	25.6512	22.8282	22.7613	2.40242	Atrip
32.1264	32.3364	32.2331	32.3395	29.8265	29.572	30.0802	30.0423	2.37858	Arhgdib
26.3088	25.6044	25.941	25.5874	25.0519	24.0319	22.5218	22.3256	2.37764	Slc11a2
26.6369	26.9104	26.1826	26.6461	23.8381	24.7343	24.3125	23.994	2.3743	Prcp
27.0175	26.9502	26.2413	27.2365	25.5071	23.2309	26.0686	23.1552	2.37093	Ndufb2
27.3644	27.4906	26.6767	27.4622	25.3029	24.7992	25.3956	24.0292	2.36677	Abcc4
28.2407	28.4996	28.5929	28.3688	26.1515	26.7783	26.6123	24.7686	2.34784	A2m
26.8059	26.9604	27.2024	26.8002	24.8172	24.5796	24.6177	24.3846	2.34241	Atp1b1
32.4775	32.4284	32.3621	32.3449	30.1116	30.1245	30.2192	29.8575	2.32503	Fn1
25.9461	26.5303	28.6173	25.8736	24.4762	24.0903	25.7105	23.4239	2.31657	Emc4
26.6581	26.6592	26.64	26.45	24.3049	22.9229	25.2846	24.6848	2.30256	Mpp2
28.081	27.4598	26.2887	27.533	25.3266	23.8062	26.3815	24.6406	2.3019	Cd81
27.3272	27.0809	27.3509	27.8674	24.453	25.776	24.8847	25.3498	2.29073	Eya4
26.5468	27.3495	26.1808	27.2141	24.758	24.2442	24.995	24.1551	2.28473	Sorbs3
30.3801	30.7148	30.3092	30.8023	28.1585	28.6187	28.2691	28.0876	2.26813	H6pd
25.5754	25.9442	26.4782	25.4685	22.9301	23.9306	24.004	23.531	2.26766	Gfra2
27.8394	28.4868	28.1556	28.333	26.6232	25.7205	25.9486	25.4844	2.2595	Ech1
26.6836	26.6671	26.6591	26.8735	23.5982	23.5611	24.4484	26.2676	2.25201	Akr1e1;Akr1e2
29.2425	28.254	27.3707	28.8352	26.5353	25.4084	26.8077	25.969	2.24551	Aebp1
27.6638	27.9588	28.1809	28.2375	25.8917	26.5711	26.8081	23.7956	2.24361	Mid1
25.4686	25.6051	25.2719	25.2577	21.8943	25.1394	22.5753	23.0283	2.2415	Lrrc32
29.4967	29.4118	28.8423	29.1121	26.3117	26.7652	27.4009	27.434	2.23774	Serpinb9
27.8726	27.9406	26.5208	26.961	24.9349	25.3794	25.6059	24.5943	2.19514	2210016F16Rik
26.3984	26.3134	26.3503	26.6387	24.5699	24.9365	23.5499	23.9032	2.18529	Bicc1
27.1106	27.3894	26.8104	26.7439	25.9476	24.1592	25.2027	24.0991	2.16141	Nfatc4
27.9425	28.1662	27.7946	28.6744	25.9039	26.5878	25.6076	25.8424	2.15902	Nit1
28.8509	29.0193	29.5382	28.3066	27.6822	26.4328	26.8056	26.2181	2.14408	Dhrs4
26.894	26.5598	26.9158	26.5176	23.3051	25.6922	23.2106	26.1423	2.13422	Arhgap35
26.5466	27.2325	27.2897	27.1892	25.2075	25.5677	23.4922	25.5171	2.11842	Col5a1
26.4217	26.4167	26.6181	26.9061	23.204	24.8143	24.5453	25.3804	2.10465	Kif21a
29.5177	29.5978	29.9354	29.5103	27.9522	27.6806	27.1881	27.3811	2.08977	Nenf
26.2156	26.4488	26.6171	26.239	24.6193	24.6099	23.1106	24.8566	2.08101	Col18a1
28.3733	28.792	28.0812	28.3698	25.9674	26.2553	26.2389	26.8313	2.08083	Pgpep1
30.3242	30.3026	30.2458	30.3494	27.7849	28.3756	28.7913	27.9632	2.07677	Fkbp7
30.2321	30.2865	30.3474	30.2181	27.9799	28.1615	28.2077	28.4867	2.06206	Tubb3
24.9287	25.1355	24.8543	25.1039	22.8762	24.0391	22.4647	22.5439	2.02464	N6amt1
26.6683	27.2471	27.0179	27.17	25.4507	24.104	25.2965	25.2132	2.00974	Gpx7
27.0868	26.9888	27.1263	27.3965	24.9622	23.3826	26.2116	26.0235	2.00462	Kif14
26.0582	26.7696	25.84	26.8566	24.7576	24.5736	23.4885	24.6965	2.00208	Pbx1
29.5791	29.4409	29.4697	29.6724	27.7763	27.6641	27.8994	26.8142	2.00204	Prrx1
25.3698	25.3811	25.0751	25.2303	23.7668	24.1484	22.2421	22.8981	2.00022	Kctd15
28.3689	28.0386	27.6586	27.8181	26.7138	23.8936	26.3449	26.9372	1.9987	Map1a
26.2022	25.8893	26.2589	27.1299	24.1176	24.3787	25.0617	23.9494	1.9932	Nexn
26.4423	26.2174	23.7549	25.9561	24.1041	24.343	23.7515	22.2046	1.99188	H2-K1
27.1598	26.5361	26.8603	26.6381	25.2833	23.4902	25.3274	25.1433	1.98753	Nid1
25.4406	26.5133	25.5395	25.7907	25.1251	23.1602	23.7903	23.2605	1.98702	Gamt
28.5968	28.3776	27.5152	28.2353	25.3178	27.0914	26.4278	25.9511	1.98417	Nnmt
25.5875	25.9432	25.7255	25.911	25.0964	23.0364	23.0773	24.0472	1.97749	Cda
30.4233	30.047	30.1	30.7537	28.2667	28.3206	28.9949	27.8611	1.97017	Fat1
24.9376	25.2172	25.2153	24.9121	24.0296	22.3847	23.3424	22.7631	1.94056	Nbr1
24.8745	25.2295	24.6837	24.711	22.8606	22.0693	23.2662	23.555	1.93692	Atg4b
27.281	26.3451	26.8523	27.6581	23.5985	26.0494	26.0384	24.7504	1.92495	Ly6c1;Ly6c2
27.9534	27.4782	26.8714	27.6308	25.7017	25.2358	26.7641	24.5541	1.91952	Abcg2
28.3141	28.0605	26.4534	28.697	25.1774	26.0261	26.8516	25.7942	1.91889	Maged2
25.5677	26.3018	26.7695	25.7458	23.753	23.2736	25.3281	24.3959	1.90856	Ywhab
26.7484	27.0859	26.0566	27.0393	25.7043	24.47	26.2319	22.9267	1.89932	Ampd3
29.7615	30.123	29.9408	29.8508	27.8966	28.0085	27.9875	28.1925	1.89774	Slc9a3r1
26.6248	26.4547	27.8039	26.4364	25.8392	23.3768	24.7855	25.7994	1.87972	Foxp1
25.7043	25.8446	25.3472	25.5077	23.4375	23.9456	23.7708	23.7598	1.87254	P4ha3
25.0424	25.2226	24.2339	25.4243	21.8793	23.3114	23.9826	23.2963	1.86339	Mndal
31.9399	32.1746	32.1652	32.0951	30.4933	29.8472	30.4199	30.1875	1.8567	Thbs1
32.116	32.1924	32.3277	32.1373	30.4619	30.3047	30.4409	30.2051	1.84018	Fth1
30.5933	30.6191	30.3358	30.2808	28.6916	27.71	29.0434	29.0382	1.83646	Lxn
28.2404	28.5532	28.4136	28.5121	26.3997	26.4111	26.6919	26.8955	1.83027	Fndc3a
31.1301	31.291	31.1913	31.1702	29.3204	29.19	29.5335	29.4435	1.8238	Pycr1
25.1292	25.0825	24.7077	25.088	23.6131	22.9963	22.5038	23.6179	1.81905	Phlda3
27.9288	28.1371	27.9387	27.8235	24.2648	26.4533	27.0589	26.7925	1.81463	Isoc2a
24.5034	25.5798	25.8326	25.2771	23.4556	24.905	23.4515	22.1265	1.81359
27.3063	27.0688	27.4862	27.2681	26.2205	23.3687	25.8096	26.4784	1.81304	Palld
25.3665	25.1837	25.4699	25.1118	23.3994	24.8723	22.2647	23.3705	1.80625	Dda1
36.5053	35.7898	36.6017	36.548	35.1047	34.6298	34.2443	34.3133	1.78813	Anxa1
26.6527	26.1648	25.7235	27.2521	23.9257	25.3846	24.4846	24.8634	1.78368	Hdgfrp3
31.6151	31.308	30.87	31.5297	29.4388	29.3443	29.9712	29.4348	1.78346	Pdgfrb
27.5472	27.4788	26.269	27.6201	24.3296	26.5914	26.0925	24.7715	1.78253	Aox1
27.8175	27.659	26.6334	27.8766	25.247	26.008	26.0235	25.6333	1.76869	Nol3
29.2493	29.4209	29.4616	29.8662	27.4559	27.4659	28.1308	27.8794	1.76649	Slc12a2
28.064	27.888	28.125	28.4411	27.0967	24.6268	26.5533	27.1762	1.76631	Gcdh
30.8737	30.8459	30.8218	30.9671	28.981	29.1004	29.15	29.2214	1.76389	Lox
24.9172	25.23	26.1662	25.1192	24.4297	23.1571	24.0075	22.7875	1.76269	Ptprk
25.9315	25.5382	23.9673	25.5895	23.8571	22.8192	23.3335	23.9763	1.76012	Cd14
24.922	25.5494	24.9211	25.8408	24.0308	24.0439	21.8899	24.268	1.7502	Tbc1d2b
26.2614	25.8812	25.8982	26.3055	24.8716	23.4149	25.2973	23.7637	1.74968	Uri1
33.1159	32.8166	32.1647	33.0843	30.7853	31.3602	31.3315	30.7146	1.7475	Rcn3
25.917	25.9374	25.4449	25.8152	23.7154	23.2834	24.2307	24.918	1.74175	Arsa
25.3471	25.5226	25.5546	25.1699	23.7751	22.7444	22.7715	25.3711	1.73302	Ppp1r12c
34.0996	33.8641	34.0905	34.1869	32.4127	32.1023	32.5282	32.2693	1.73213	Tpm2
31.88	32.1146	31.8113	31.9832	30.0424	30.3245	30.1665	30.3508	1.72622	Xdh
27.7988	27.6521	27.4607	27.7834	25.7543	26.4249	26.0192	25.5929	1.72594	Lpgat1
32.4993	32.5372	32.4851	32.6366	30.9063	30.9373	31.0572	30.3917	1.71641	Cyb5a
27.8787	27.6546	27.4542	27.9475	25.7542	26.2383	26.3389	25.7552	1.71212	Epdr1
26.2221	25.2126	24.9633	26.2341	23.7805	23.9899	24.7542	23.2821	1.70637	2200002D01Rik
25.6989	26.3332	25.8967	26.2029	24.9374	25.633	22.811	23.9314	1.70468	Tsen15
25.5669	25.4138	25.0263	25.4744	23.8367	23.706	22.1759	24.9751	1.69694	Meis2
29.2684	28.7719	29.2846	29.5559	27.1284	27.3118	27.7285	27.9425	1.6924	Apbb1ip
25.6585	26.0416	23.8834	26.4452	23.6329	24.0709	24.4495	23.1099	1.6914
29.4129	28.3078	28.5439	28.6728	27.3551	27.3541	27.0285	26.4549	1.68618	Erbb2ip
28.8592	28.9216	29.0385	28.7332	27.3572	26.9668	27.2942	27.2076	1.68171	Zc2hc1a
24.8363	25.1649	24.8072	25.2308	22.8818	24.468	22.1612	23.8047	1.68087	Plcb1
25.0215	25.8453	25.8074	25.8526	23.6666	23.464	23.6462	25.0282	1.68049	Mvp
26.9963	26.6403	26.2674	26.2408	24.5885	25.3647	24.8797	24.6122	1.67492	Cpt1a
36.618	36.5844	36.6614	36.8102	34.8443	35.2562	35.0008	34.9295	1.66084	Actc1;Acta1
26.8787	26.9917	27.05	27.3001	25.3002	24.6149	26.0237	25.6424	1.6598	Aplp2
33.9765	34.3471	33.8465	34.1072	32.4164	32.2984	32.49	32.4426	1.65746	Pck2
29.3771	29.6232	29.6136	29.431	27.9256	27.6255	28.1427	27.7925	1.63962	Leprel4
29.9591	30.3847	30.3224	30.3907	28.972	28.4156	28.6971	28.4154	1.63917	Col3a1
26.6471	27.5117	26.7274	27.1547	25.611	25.0975	25.2332	25.5742	1.63125	Cr1l
29.2669	29.3618	29.4398	29.4098	27.8811	28.0913	27.591	27.4337	1.62027	Il6st
25.0967	25.5877	26.2456	25.347	23.7823	23.6636	23.9679	24.4097	1.61338	Taf15
27.8771	27.2476	27.751	27.88	26.1794	26.2903	25.7213	26.1181	1.61166	Tpm1
29.3321	29.4674	29.189	29.0735	27.7528	27.196	27.8617	27.8115	1.61	Impact
24.2829	25.8886	25.3988	24.9105	22.564	23.9864	24.8326	22.6924	1.60139	Kank1
27.2434	26.7864	26.3912	26.8946	25.3646	25.1039	25.4124	25.0436	1.59775	Eif4g3
28.7093	28.8093	28.0715	27.1032	26.6442	26.0649	27.0537	26.5499	1.59515	Arpin
31.2072	31.0916	30.8744	31.2891	29.4055	29.7541	29.6415	29.2993	1.59047	Cdh11
32.4283	32.5045	32.5924	32.9269	30.7701	31.0309	30.9143	31.3763	1.59012	Tmsb4x
25.2753	25.3173	25.4058	25.5293	23.8744	24.0801	22.6621	24.5934	1.57943	Cxcl5
31.0799	31.0552	30.9399	31.2177	29.6542	29.6424	29.3783	29.3313	1.5716	Snx18
28.8732	29.2945	28.9473	29.0708	27.5868	27.0642	27.8043	27.4936	1.55918	Tmem55a
33.207	33.2531	33.1131	33.4431	31.7059	31.6132	31.8529	31.6632	1.54523	Pdlim5
25.868	25.4234	25.1497	25.9132	23.1831	23.2892	25.1194	24.5873	1.5438	Rps10
25.7926	25.7827	25.8267	26.0623	24.3734	24.2179	24.885	23.8151	1.54321	Itm2c
30.1225	30.5638	30.3968	30.3969	29.1936	28.5142	28.7849	28.823	1.54109	Mmp14
25.7878	25.1626	25.6473	25.5958	24.182	24.7142	23.4728	23.7342	1.52259	Rab4b
26.7904	26.4137	26.4787	26.7137	25.0306	25.4198	24.4578	25.4081	1.52005	Cxadr
25.6302	26.0453	25.5306	25.7595	25.1846	23.3173	23.5224	24.8789	1.51561	Tpd52l2
26.6678	27.0594	26.5134	26.9119	25.1253	25.7679	25.0414	25.2304	1.49689	Sgce
29.4192	29.2467	29.1335	29.3855	27.8367	27.9615	27.8165	27.5872	1.4958	Ca13
31.6045	31.7601	31.5098	31.7535	30.1953	30.2003	30.0816	30.187	1.49095	Dnpep
27.3514	28.1108	27.8086	28.4047	26.8606	26.2413	26.3429	26.2742	1.48914	Zadh2
26.2801	26.1924	25.5609	26.3629	24.3409	23.5929	25.6796	24.8348	1.48702	Piezo1
27.585	27.5773	26.8529	27.5962	26.0159	25.5927	25.9081	26.164	1.48267	Pfn2
33.5818	33.5635	33.865	33.5733	32.3523	32.4358	31.8281	32.0797	1.47194	Acta2;Actg2
26.4275	26.8941	26.2078	26.7058	26.047	23.4195	25.4128	25.4815	1.46863	Eogt
27.1395	26.7915	27.1049	27.0668	26.0282	26.2763	23.942	25.9857	1.46763	St5
28.3243	27.7194	27.1435	28.3012	26.6518	26.3203	26.5058	26.1595	1.46274	Plekho2
28.1244	28.6754	28.0954	28.8928	27.5528	25.9976	27.6937	26.7094	1.4586	App
33.1472	33.3027	33.014	33.2459	31.767	31.7867	31.7383	31.5933	1.45612	Aldh2
28.6625	28.7071	28.9472	28.7466	27.6576	27.4869	26.897	27.214	1.45197	Klhdc4
34.9044	34.0983	34.9349	34.9289	33.989	33.2439	32.6143	33.2263	1.44824	Anxa6
30.1382	30.0581	30.3731	30.6834	28.579	29.4858	29.6264	27.7744	1.44684	Fkbp11
28.0401	27.3398	26.0522	27.6834	25.375	26.6512	26.3115	24.9927	1.44627	Cd99
25.7005	25.645	25.9752	25.7555	23.3121	25.0635	23.6993	25.2452	1.43905	Lmo4
26.6939	26.8497	26.7135	26.5838	24.428	25.3958	25.716	25.5467	1.43856	Cebpb
30.0342	29.617	28.7675	29.8758	27.4577	28.7064	28.3847	27.9994	1.43656	Mri1
26.3875	25.3294	25.491	26.1113	24.0623	24.6946	24.564	24.3325	1.41646	Vps37c
26.8401	26.9764	26.5727	26.9054	24.3173	24.738	26.263	26.3318	1.41115	Mapkapk2
30.8193	30.5246	30.5003	30.8052	29.2514	29.2211	29.1219	29.4118	1.41082	Tgfb1i1
24.2192	24.7593	24.0279	24.4853	22.6872	23.661	22.8953	22.6196	1.40715	Ptprs
25.4347	26.3606	25.7324	25.7349	25.2243	24.9247	23.8775	23.6195	1.40412	Atp2b4
29.3866	29.7274	29.7721	29.5397	28.6117	28.0116	28.2278	27.9602	1.40366	Acsl1
31.8788	31.8828	31.3006	31.9583	30.2761	30.2107	30.6484	30.2732	1.40303	Ripk3
31.7971	31.982	31.3537	31.9888	30.7449	30.0839	30.34	30.3456	1.4018	Rcn1
33.4111	33.5099	33.4006	33.5257	32.1687	31.8624	32.0893	32.1247	1.40058	Palld
34.3907	34.4722	34.4254	34.4575	32.9337	33.0617	32.9855	33.1684	1.39914	Esd
32.7327	32.768	32.8738	32.7405	31.383	31.3134	31.2882	31.5357	1.39868	Csrp1
26.1372	26.5149	25.683	26.7554	25.0499	24.9407	25.3638	24.1494	1.39666	Amdhd2
24.5124	25.2643	24.4382	25.0628	24.0464	23.9983	23.6032	22.0499	1.39498	Adgra2;Gpr124
31.0826	31.2446	30.9412	30.9173	29.588	29.5002	29.8314	29.7003	1.39146	Echs1
28.6976	28.7652	27.6357	28.3105	27.4996	26.3736	27.4108	26.5609	1.39104	Dap
24.9728	24.624	23.997	24.7301	23.4373	22.8606	24.2535	22.2199	1.38815	Atg101
32.4922	32.6414	32.4898	32.6466	31.2145	31.1681	31.3653	30.9747	1.38687	Glg1
26.9394	26.6151	26.509	27.0577	25.2662	25.5505	25.4422	25.3155	1.3867	Ripk2
27.5053	28.1304	27.4554	27.7743	26.8311	26.0771	25.9421	26.4742	1.38522	Gm2a
29.3864	29.9389	29.513	28.8205	28.4092	26.9495	28.3382	28.4645	1.37434	Crip1
26.0471	25.5271	25.3528	25.8523	24.5974	22.8916	24.8773	24.9274	1.37137	Sh3d19
25.5483	25.4905	25.2104	24.8176	23.4817	23.6948	24.9217	23.4966	1.36802	Tgfbr2
28.5755	28.5261	28.4458	28.6694	27.3136	27.0017	27.184	27.2486	1.36718	Adam9
29.2412	29.436	29.5551	29.6057	28.6731	27.3556	27.5407	28.8138	1.36371	Palm2;Pakap
32.2918	32.501	31.9498	32.2305	30.7863	31.0051	31.0328	30.6974	1.36287	Sod2
26.0165	25.4284	27.119	26.4001	25.0984	25.0861	24.8823	24.4731	1.35598	Antxr1
28.0271	27.5749	26.6027	27.3835	25.9362	26.5124	25.7213	26.0095	1.3522	Gpc1
25.4908	25.574	25.2242	25.7162	24.9733	23.4348	24.8565	23.3696	1.34274	Timp2
30.6217	30.5056	30.3575	30.4142	28.9114	29.2089	29.19	29.2189	1.34246	Glod4
28.3611	28.276	28.2184	28.2668	27.3034	27.0571	27.2732	26.1317	1.33923	Ahnak2
31.8886	31.5861	31.6064	31.7472	30.2112	30.6137	30.4926	30.1688	1.33552	Hspa1b
28.435	27.053	27.0624	28.3421	25.9455	26.7529	26.6302	26.2253	1.33465	Myadm
29.3573	29.0824	29.1802	29.468	27.8446	28.1756	27.8453	27.911	1.32783	Prrc1
27.6008	27.9344	27.8093	28.333	27.2028	26.4183	26.1053	26.6465	1.32613	Igf1r
27.7701	27.0835	27.566	28.152	26.3796	25.5208	26.8382	26.5337	1.32482	Arhgef40
28.758	28.7844	28.4368	28.706	27.2521	27.2889	27.4473	27.3977	1.3248	Gmppa
28.6702	28.5216	29.1185	28.9087	27.5649	27.6096	27.6312	27.1239	1.32233	Nrp1
29.1258	29.2025	29.4457	29.511	27.8923	27.8592	28.1188	28.1595	1.31377	Cltb
25.715	25.6175	24.9793	25.1588	24.0528	23.5221	23.9886	24.6579	1.31229	Akr1c14
32.2253	32.3803	31.8615	32.108	30.8421	30.8754	30.7431	30.8761	1.30958	Gstm1
25.3328	25.8979	25.3823	26.0918	25.2834	23.2139	24.6607	24.3264	1.30508	Tpm1
30.4605	30.6876	30.2061	30.8777	29.1306	29.6039	29.3497	28.9693	1.29461	Vasp
24.6622	25.1515	25.2514	24.7084	22.9509	24.1201	24.1025	23.4253	1.29361	Pdgfra
29.846	29.6895	29.4703	29.7681	28.0984	28.4283	28.8529	28.2208	1.29335	Ikbip
28.3008	28.2169	28.2409	28.325	27.0059	27.2256	26.8274	26.8634	1.29033	Serpinf1
29.651	29.9496	29.6518	29.683	28.762	27.7959	28.6241	28.5962	1.28931	Nt5c
25.268	25.3403	25.1809	25.0587	23.0311	24.6822	24.4309	23.5556	1.28702	Lemd2
33.3455	33.2891	33.0913	33.407	31.9416	31.8909	32.0478	32.1045	1.28701	Lpp
30.5201	30.559	30.543	30.584	29.2679	29.4379	29.4103	29.0091	1.27022	Camk2g
34.187	34.4102	34.316	34.4277	33.0332	33.1331	33.0643	33.0517	1.26468	Oat
29.2885	29.7624	29.5449	29.1511	27.9715	27.8108	28.2541	28.6558	1.26364	Pon3
31.9699	31.2292	31.8109	31.8932	30.5148	30.8211	30.6224	29.8963	1.26216	Anxa7
31.8786	31.9547	31.5035	31.8555	30.4195	30.5028	30.7234	30.5098	1.25922	Idh1
30.1316	30.4325	30.281	30.4628	29.1168	29.2372	28.9658	28.9632	1.25622	Acadsb
31.2794	31.1696	31.0304	31.2651	29.8797	30.0743	29.9598	29.8122	1.25464	Pla2g4a
26.5926	27.247	27.0601	26.9596	25.6199	25.8144	25.9609	25.4496	1.25364	Auh
33.159	32.3132	33.1095	33.0045	31.8645	31.2124	31.5907	31.921	1.24937	S100a10
35.5458	35.7507	35.6774	35.7597	34.3093	34.3178	34.4843	34.6265	1.24891	Tagln
26.7929	27.137	26.6651	26.7468	25.3474	25.4372	25.9175	25.6629	1.2442	Vwa8
32.5359	32.5516	32.3146	32.6919	31.1638	31.343	31.3683	31.2611	1.23943	Ehd2
30.1155	29.9852	30.5206	30.5382	29.1539	29.1513	29.2349	28.6694	1.23748	2019-09-08
29.3649	29.3495	28.8321	29.3612	27.708	28.4081	28.0642	27.7782	1.2373	Fstl1
26.0173	25.9092	25.3995	25.8472	24.4558	24.1351	24.8479	24.827	1.22685	Tdrd3
25.0086	24.3213	25.3035	25.1964	24.6035	23.1947	24.0168	23.1142	1.22517	Dars2
27.883	27.5128	27.6357	27.8323	26.3516	26.3425	26.6305	26.6788	1.21509	Bphl
30.6494	30.7151	30.6499	30.7379	29.4045	29.522	29.4975	29.4839	1.21111	Acsl4
28.4198	28.1988	28.469	28.2886	27.1677	26.8209	27.158	27.4033	1.20655	Vps4a
27.2673	27.9188	27.5699	27.3522	26.8861	26.2526	26.0944	26.0693	1.20148	Aldh6a1
24.8947	24.8018	25.1939	25.4144	24.5083	22.7652	24.3989	23.8282	1.20107	Col14a1
25.4792	25.3998	26.0386	25.4622	24.5903	24.4146	24.3671	24.2287	1.19478	Abat
29.5043	29.4785	29.7074	29.4902	28.5021	28.7895	28.2846	27.8327	1.19286	Bag2
28.0658	28.6401	28.7187	28.6995	27.4741	27.2204	27.2482	27.4217	1.18994	Rras
34.93	34.6818	34.2386	34.9896	33.2511	33.7036	33.9667	33.1621	1.1891	Col1a1
31.7978	31.9126	32.0019	32.0192	30.6916	30.7382	30.8433	30.71	1.18707	Ppic
26.293	25.5762	25.4576	25.3846	23.5977	24.8454	24.7681	24.7578	1.18561	Irgq
32.6788	32.8222	32.3231	32.5806	31.5752	31.2997	31.2144	31.5766	1.18471	Gstm2
24.4883	24.4925	25.0498	24.4408	22.4567	23.408	23.7267	24.1516	1.18213	Chsy1
25.5049	24.8166	24.8845	25.5593	23.1509	23.58	24.5691	24.7393	1.18146	Plaur
28.9417	29.0057	28.6167	28.6861	27.5996	27.5921	27.601	27.7376	1.17999	Aga
30.6778	30.7962	30.5281	30.6597	29.4275	29.6682	29.4897	29.3681	1.17712	Acadm
32.5148	32.6952	32.4054	32.7509	31.1687	31.5535	31.4531	31.4846	1.17658	Pnp
31.1618	31.1783	30.9332	31.3253	30.1159	29.7668	30.189	29.8308	1.17403	Gng12
24.5369	24.5734	24.7451	25.0736	24.2976	23.2902	23.7007	22.9788	1.16543	Slc1a4
27.5292	27.5657	27.646	27.6179	26.1349	26.2103	26.4147	26.9423	1.16411	Osmr
27.5301	27.6777	28.0609	27.9264	26.9266	26.312	26.4062	26.9056	1.1612	Gna14
30.3023	30.6757	30.3285	30.3416	29.0717	29.2662	29.2973	29.377	1.15897	Tubb2a
28.8774	28.6386	28.5214	28.6579	27.7627	27.411	27.5319	27.3558	1.15845	Hsd17b11
30.1354	30.5142	30.5366	30.508	29.3145	28.7648	29.4791	29.5063	1.15738	Csrp2
31.9479	31.8109	31.9033	31.9297	30.8261	30.8265	30.7139	30.6244	1.15024	Maoa
30.9357	31.2765	31.1454	31.3052	29.9909	29.8291	30.1376	30.1076	1.14938	Casp3
31.8414	31.9044	31.7421	31.8932	30.7889	30.5708	30.8244	30.619	1.14449	Farp1
28.0368	27.5195	27.729	27.8627	26.6009	26.9707	26.6299	26.387	1.13988	Tmed3
33.9153	33.8206	33.5808	33.9525	32.6836	32.6683	32.8601	32.4991	1.13953	Lrp1
25.3881	25.6427	25.3107	25.2441	24.2873	24.1692	24.6368	23.9442	1.13702	Athl1
27.5223	27.6176	27.0562	27.5298	25.7364	26.0969	26.7015	26.6471	1.13604	Wasf2
30.3855	30.3787	30.2395	30.5766	29.2757	29.0871	29.5146	29.1678	1.13375	Bag3
29.5994	30.0186	29.338	30.2502	28.5002	29.3339	28.499	28.3408	1.13308	Glrx
29.7375	29.7084	29.4927	29.8063	28.5122	28.2645	28.7839	28.6621	1.13057	Golim4
27.6124	28.2507	28.0056	27.6457	27.0507	26.1995	26.7988	26.9738	1.12289	Pacsin1
26.642	26.7167	26.5876	27.0339	25.7828	25.7214	25.9181	25.0984	1.11489	Tm9sf1
25.9729	24.7554	24.4023	25.6486	24.5961	24.1257	24.1866	23.4166	1.11355	Ephb3
29.3202	29.5619	29.1372	29.3122	28.0009	28.1464	28.3642	28.3704	1.11241	Blvrb
27.7988	27.8701	27.4891	28.0371	26.5848	27.3213	26.7893	26.0668	1.10828	Itm2b
32.389	32.7332	32.4272	32.4566	31.3587	31.4529	31.3529	31.4129	1.10711	Oxct1
25.1781	24.9094	24.6505	24.9569	23.9385	23.946	23.9577	23.4406	1.10301	Slc25a46
29.6387	29.782	29.7949	29.5819	28.476	28.75	28.582	28.5827	1.10169	Dclk1
31.6621	31.6375	31.5933	31.6927	30.3968	30.8358	30.536	30.4138	1.10077	Mvp
29.3209	29.2339	29.3683	29.5116	28.3519	28.3233	28.0999	28.2666	1.09822	Zak
29.0032	29.1667	29.127	29.215	27.8339	28.0938	28.2936	27.9051	1.0964	Carkd
26.3523	27.1437	26.8895	26.1406	25.5084	25.5575	25.6054	25.4872	1.09191	Sil1
27.2476	27.1578	26.9413	27.2653	26.0807	25.4361	26.3221	26.4146	1.08965	Guk1
31.4633	31.5725	31.5177	31.5468	30.423	30.3265	30.4705	30.5254	1.08872	Vcam1
30.4866	30.7296	30.4375	30.5114	29.2725	29.3106	29.4385	29.79	1.08843	Rexo2
30.8021	30.8857	30.4727	30.5607	29.4144	29.4476	29.5588	29.9546	1.08641	Serpinc1
29.824	29.9166	29.6487	29.8091	28.9254	28.3755	28.7951	28.7592	1.08578	Ak3
29.6402	29.6915	29.1123	29.7827	28.1545	28.4159	28.6917	28.6323	1.08306	Arfgap3
26.1131	26.3935	26.5631	26.4399	25.2411	25.2924	25.2175	25.4317	1.08173	Csad
30.3796	30.046	29.7709	30.2552	28.9651	28.9303	29.3038	28.9339	1.07965	Enah
28.6441	28.2216	27.4321	28.63	26.8304	27.5217	27.4055	26.8527	1.07937	Hspb8
29.587	29.8539	29.5764	29.5533	28.4925	28.5893	28.48	28.7098	1.07473	Gnpnat1
26.4898	27.3222	26.7655	27.5568	26.5688	25.8928	25.8506	25.5307	1.07279	Cmc2
28.3201	28.241	28.2936	28.2214	27.516	27.0001	27.5889	26.6875	1.07087	Mical2
26.4049	26.1907	26.4557	26.5496	25.3325	25.3437	24.8837	25.7591	1.0705	Fas
27.0609	27.2014	27.5436	27.46	26.5594	25.9191	26.4122	26.0963	1.06973	Chd3
25.2672	25.6447	25.5438	25.4551	24.2212	24.4097	24.1491	24.8542	1.06914	Bcs1l
28.6741	28.5436	28.3583	28.6883	27.7541	27.6601	27.3801	27.2021	1.06697	Fbn1
27.13	26.7032	26.6055	26.9763	25.5584	25.2153	26.0117	26.3706	1.06476	Atg4b
29.7884	29.7354	28.8538	29.6482	27.6886	28.3367	29.2578	28.4902	1.06311	Triobp
24.5718	25.1961	25.1176	24.7716	24.3752	23.8744	22.827	24.3444	1.05903	Pik3ca
25.5635	26.5498	26.7572	26.4964	25.4719	25.2977	25.1679	25.1945	1.05873	Ssna1
37.1154	37.3378	37.3647	37.3054	36.2931	36.1462	36.2084	36.2461	1.05735	Serpinh1
31.7792	31.9434	31.4621	31.7722	30.2331	30.8431	30.8444	30.8151	1.05531	Pgls
30.2458	30.7838	30.5623	30.6757	29.4435	29.6067	29.4699	29.5294	1.05452	Ctsl
30.7466	30.8724	30.5936	30.8835	29.6966	29.5575	29.8395	29.8046	1.04947	Tes
30.9457	30.8559	31.1515	31.1225	30.0299	30.045	29.8872	29.9303	1.04576	P3h1;Lepre1
31.7951	31.9941	31.7058	31.7426	30.6649	30.6968	30.7146	30.9907	1.04264	Glo1
26.4472	26.7693	26.721	26.8989	25.6926	25.8035	25.4655	25.7083	1.04163	Chid1
26.7993	27.5956	27.4642	27.457	26.7066	25.4441	26.5677	26.4338	1.04098	Ccdc134
25.9186	26.1767	26.5328	26.3608	25.5058	25.663	25.6313	24.0331	1.03891	Osbpl2
27.0441	26.9207	26.7828	27.1009	25.9919	26.1929	25.9462	25.5634	1.0385	Tcaf2
33.5925	33.4343	33.5199	33.6909	32.4717	32.4966	32.5879	32.5358	1.03639	Ctps1
27.8127	27.2337	27.3065	27.6493	26.4857	26.7351	26.6494	25.9981	1.03351	Ank3
28.4338	29.1711	28.6431	28.9743	27.8065	27.6179	27.4815	28.1912	1.0313	Prmt3
33.217	32.8759	32.4746	33.1122	31.5892	31.9062	32.3713	31.7029	1.0275	Col1a2
30.6104	30.8326	30.7789	30.8584	29.832	29.7188	29.7969	29.6376	1.02373	Cat
27.3993	27.6841	27.6198	27.6308	26.4186	26.5086	26.5689	26.7469	1.02274	Pdlim2
29.1264	29.2231	29.7476	29.2017	28.6418	27.7289	28.3453	28.4934	1.02233	Ndufa7
27.2212	27.4587	27.103	27.083	26.4936	26.0416	26.4332	25.8198	1.01942	Rab11fip5
28.8111	28.5598	28.4857	28.7786	27.2183	27.3307	28.3068	27.705	1.01862
31.2037	31.2686	30.8047	31.2276	29.9204	30.1906	30.1821	30.1466	1.01624	Ptgr1
31.1272	31.0103	30.8108	31.1424	30.0911	29.9365	30.1535	29.8673	1.01059	Atl3
29.1471	29.0389	29.4151	29.1788	28.5033	28.0277	28.1694	28.0575	1.00549	Gpx8
31.115	31.5094	31.0741	31.6574	30.276	29.7506	30.8426	30.4704	1.00406	Ifi204
33.5321	33.5768	33.3396	33.3976	32.4552	32.4681	32.3644	32.5475	1.00273	Pgd
33.6946	33.7447	33.7831	33.7706	32.6858	32.9864	32.5527	32.7608	1.00181	Dstn
29.4017	29.2595	29.5424	29.2464	30.3004	30.7094	30.1399	30.3018	-1.00035	Kif11
25.5064	24.6712	25.1103	25.9035	26.1293	26.5849	26.2438	26.2395	-1.0015	Ccnt1
26.187	26.4833	26.1666	26.113	26.6939	27.6029	27.5787	27.085	-1.00265	Nmt2
26.2457	25.8653	25.5719	26.5474	27.1673	26.6263	27.2955	27.1664	-1.00633	Gltp
28.6796	28.9961	28.6329	28.735	29.7696	29.9255	29.6296	29.7557	-1.00922	Sbds
29.0416	28.3923	29.0099	28.9422	30.1894	29.7954	29.9977	29.4537	-1.01255	Ddx27
30.0116	30.2906	30.5039	30.2371	31.3092	31.2317	31.1798	31.3838	-1.01534	Fdps
27.5868	27.2883	27.0663	27.2631	28.3231	28.137	28.3911	28.4192	-1.01647	Phax
30.0254	30.0166	29.5457	29.8801	30.7392	30.9998	30.898	30.8987	-1.01696	Ddx58
26.6638	26.7619	26.8448	26.9029	27.8389	27.418	27.9299	28.0693	-1.02066	Polr1d
25.2855	23.886	25.0357	24.6741	25.7494	25.5194	25.8501	25.8471	-1.02122	Morc3
27.0307	26.5865	26.6569	27.2112	27.9321	27.9916	28.0714	27.5774	-1.02182	Cirh1a
25.3306	24.3259	24.4973	24.4343	25.9336	26.0577	25.2642	25.4225	-1.02246	Nf1
28.7099	28.0702	27.8072	28.5056	29.4896	29.0415	29.3911	29.2701	-1.02486	Txnl4a
28.1957	28.0692	27.274	28.5264	28.8817	29.5895	29.0095	28.6894	-1.0262	Kdm1a
28.3955	27.7005	27.8602	27.7043	28.824	29.1485	29.0158	28.783	-1.02769	Prim2
29.0907	28.6943	28.5836	28.9331	29.7364	30.0245	30.0868	29.5682	-1.02853	Cherp
27.3861	26.7594	26.6414	27.2141	27.9587	28.3181	27.8263	28.0162	-1.02956	Kti12
29.0312	29.1517	29.1321	29.4161	30.2877	30.2116	30.2317	30.1252	-1.03125	Rfc2
30.5909	30.4695	30.5701	30.6224	31.5482	31.6713	31.6498	31.5116	-1.03199	Pds5b
25.4912	24.8112	24.154	23.8142	25.7938	25.6373	25.5817	25.386	-1.03205	Kri1
28.7618	28.6906	28.6444	28.9265	29.8365	29.8971	29.881	29.5536	-1.03622	Ece1
25.4727	26.0613	26.3455	25.7125	27.0015	26.3566	26.814	27.5739	-1.03851	Ccdc12
27.9594	27.5233	27.0264	26.6079	28.1468	28.2036	28.5214	28.4077	-1.0406	Ccnh
28.3052	27.8808	28.7445	28.7341	29.7391	29.4004	29.4079	29.2809	-1.04091	Dimt1
26.3313	26.0155	26.3596	26.4563	27.6759	27.3241	27.117	27.2127	-1.04176	Bod1l
27.1074	25.9537	26.3775	25.9098	26.8721	27.8024	27.2986	27.5469	-1.04293	Cobll1
27.8647	27.9231	26.9271	28.2929	28.4822	29.49	28.7981	28.419	-1.04539	Prkci
29.6915	28.7276	28.9999	29.358	30.3283	30.4709	30.3187	29.8585	-1.04983	Rbm25
25.9836	25.8744	25.7387	25.8578	27.0091	26.7605	26.7455	27.1417	-1.05059	Parp14
27.1637	27.128	27.2495	26.7189	27.8824	28.1946	27.9991	28.3953	-1.0528	Msto1
26.8014	26.612	26.7401	26.51	27.637	27.9322	27.6898	27.621	-1.0541	Suz12
30.6318	30.3235	30.9408	30.7186	31.8799	31.8931	31.678	31.3833	-1.05489	Pdcd11
27.892	27.3289	28.0807	27.7723	28.8446	29.102	28.9385	28.4194	-1.05763	Ddx54
25.9286	25.6028	26.1533	26.988	27.5379	27.3913	26.7898	27.1885	-1.0587	Fam195b
26.1957	26.1346	25.6916	26.4794	27.0528	27.3054	27.2795	27.1013	-1.05943	Irf9
28.6658	28.1987	28.0781	28.5516	29.739	29.5009	29.5296	28.9627	-1.05948	Cd109
27.7365	27.2506	27.5981	27.5012	28.6173	28.7626	28.3498	28.6246	-1.06694	Iws1
28.9722	29.004	28.8543	29.058	30.1002	30.0052	30.0017	30.0632	-1.07045	Cmtr1
23.9625	24.3614	24.5446	23.8506	25.4025	25.4917	24.8711	25.2425	-1.07216	Sipa1l1
23.5248	24.21	24.1681	24.1448	25.1876	25.0787	24.9816	25.0887	-1.07224	Znhit3
27.5612	27.2382	26.8941	27.5351	28.4866	28.4551	28.3018	28.2856	-1.0751	Smek1
29.089	29.0763	29.0725	29.1863	30.2969	30.3584	29.8252	30.2596	-1.07897	Eif2b1
28.7156	28.8556	28.819	28.4663	29.7401	29.6474	29.9053	29.8901	-1.08157	Echdc2
28.538	28.0626	28.5512	28.0245	29.5613	29.6063	29.3303	29.0049	-1.08161	Cebpz
25.9544	26.9347	26.9915	26.6808	27.6179	28.1081	27.3894	27.7799	-1.08347	Polr2d
26.8557	26.627	27.9483	27.2588	28.2566	28.3305	28.2679	28.176	-1.08534	Yars2
27.1368	26.514	26.5843	26.3481	27.8381	27.744	27.8347	27.5095	-1.08575	Heatr5b
29.3249	29.4304	29.1169	29.434	30.2247	30.4642	30.6124	30.3486	-1.08589	Ndrg1
26.9082	26.6392	26.8249	27.3992	27.8332	28.8391	27.7833	27.6599	-1.08603	Arglu1
23.0165	22.9079	22.8438	23.3333	24.3019	23.9957	24.0748	24.0756	-1.08662	1110004E09Rik
26.8223	26.4516	26.4194	26.7859	27.7718	28.0203	27.7681	27.3187	-1.09992	Rps19bp1
27.8028	27.2744	28.156	27.9311	29.3549	28.9199	28.8719	28.4233	-1.10141	Nop14
22.8844	23.1055	23.1221	22.455	24.2742	23.4816	24.6496	23.589	-1.10686
24.5914	24.4989	24.2989	24.6216	25.4432	25.6067	25.5006	25.8987	-1.10963	Prpf38b
30.5288	30.3289	30.3051	30.4482	31.5696	31.4075	31.5327	31.5427	-1.11038	Rrp12
28.6145	28.1297	28.0977	28.6053	29.1029	29.6935	29.5903	29.5399	-1.11984	Cpsf2
24.8971	24.3074	24.4231	24.7778	25.7783	25.3663	25.9447	25.7974	-1.12033	Med27
24.4137	23.6557	23.8233	24.7041	25.3117	25.963	24.8536	24.9569	-1.12209	Lrrk2
24.4917	25.1047	24.2181	24.7358	26.1501	25.4946	25.4993	25.9159	-1.12738	Ttc39b
25.3605	25.5361	25.8203	25.129	25.8962	27.7419	26.4569	26.2607	-1.12749	Gemin2
23.8814	24.1761	23.8235	23.81	24.8306	25.0245	24.8507	25.5015	-1.12907	Psmb9
23.577	25.0069	23.0255	24.0828	25.2919	24.946	24.9211	25.0527	-1.12988	Elf2
33.0947	33.063	33.138	32.8548	34.3139	33.9846	34.5645	33.8072	-1.12994	Lmna
25.2913	25.1478	23.6824	25.567	26.2769	26.1929	25.8631	25.8861	-1.13263	Mcts2
26.6573	26.3907	26.3645	26.6333	27.4884	27.7182	27.649	27.7336	-1.13587	Chaf1a
26.2051	26.1541	26.1647	26.6711	27.8385	27.5701	27.6662	26.695	-1.14367	H1fx
24.4829	23.407	24.6764	24.2655	25.0365	25.8177	25.565	24.9961	-1.14586	Polr3h
26.9997	27.7406	27.8634	27.2703	28.722	28.1454	28.8043	28.7988	-1.14911	Paf
26.679	26.7804	26.9091	26.8406	28.0262	27.2531	28.2657	28.2743	-1.15255	Mnat1
24.1149	24.1508	25.1313	23.9509	25.2457	24.5904	26.0606	26.0701	-1.1547	Spdl1
22.5511	22.9277	23.5286	22.9717	24.3003	24.2363	23.8442	24.2313	-1.15826	Kdm3a
23.5431	23.2613	23.431	23.7502	24.4769	25.0389	24.6459	24.4614	-1.15938	Appbp2
24.2558	23.7169	23.6693	23.4239	24.4368	25.2112	25.8891	24.1704	-1.16039	Gpkow
29.8535	30.1835	29.7605	29.942	30.9747	31.1362	31.1032	31.1696	-1.16106	Nampt
26.6006	26.5073	26.1954	26.7455	27.8941	28.0914	27.5769	27.1347	-1.16206	Mphosph10
23.0732	22.1489	24.2678	22.8152	24.2111	24.3254	24.1096	24.311	-1.163	Mettl15
27.5169	27.5517	26.7488	26.856	28.9564	28.4776	28.4749	27.4181	-1.16341	Cers5
25.2934	24.1401	25.5188	23.7774	25.9081	25.3276	26.0029	26.154	-1.16571	Cdca8
28.5911	28.5053	28.8372	28.6659	29.5693	30.1772	29.7072	29.8145	-1.16719	Bud31
29.5479	29.1768	29.994	29.5526	30.92	30.8951	30.6133	30.5229	-1.17	Kiaa0020
28.867	28.4038	28.4683	28.7238	29.6733	29.8285	29.8519	29.7994	-1.17255	Prim1
24.7717	25.2047	24.758	25.3868	26.3812	26.6453	25.8568	25.9293	-1.17285	Nsmce4a
24.2532	24.1635	24.1424	24.8551	25.0554	26.1276	26.0046	24.9188	-1.17305	Znf593
27.8333	27.6042	27.5707	27.4159	28.9333	28.9892	28.655	28.5464	-1.17491	Adar
28.5048	28.1156	28.3921	28.78	29.8505	30.3899	29.8017	28.4515	-1.17527	H3f3a;H3f3c
26.8208	27.028	26.5192	26.8114	27.9988	27.6507	28.1537	28.0831	-1.17672	Dtx3l
29.9632	30.1637	29.6725	29.8522	31.2049	31.0737	31.0037	31.1008	-1.18284	Stat1
27.3902	27.1848	27.2633	27.6916	28.7504	28.6632	28.1222	28.7344	-1.18508	Ddx51
23.4999	25.1157	25.4831	25.281	26.2025	25.8529	25.8696	26.2005	-1.18644	Sap30
27.364	26.9439	28.6374	28.0859	29.2273	29.0677	29.0452	28.4445	-1.18837	Utp6
27.1519	26.529	27.2392	27.7103	28.39	28.3583	28.398	28.2383	-1.18853	Kif15
24.6252	25.3701	25.7621	25.4827	26.9403	26.7428	25.8717	26.4901	-1.20121	Abhd17b
25.1715	23.4215	24.0255	25.2315	25.7816	26.0754	25.5024	25.3426	-1.213	Tox4
25.7989	25.4662	25.7618	25.5934	26.7196	27.333	26.8085	26.6132	-1.21346	Med19
26.235	26.3285	26.4475	25.7489	27.4592	27.1257	27.3768	27.6617	-1.2159	Rassf1
26.8002	26.7441	26.0196	26.4738	27.7826	28.0194	27.6961	27.4061	-1.21665	Helz2
27.6898	27.5934	26.3563	27.1882	28.2645	28.5603	28.659	28.2553	-1.22787	Irf2bpl
28.8097	28.7225	28.8657	29.171	30.2181	30.4161	29.9709	29.8804	-1.22919	Eif2ak2
26.76	27.7116	27.891	27.3442	28.2258	28.6308	29.2325	28.544	-1.23156	Phldb1
29.5756	29.7035	29.6053	29.6146	30.6751	30.9799	30.937	30.8473	-1.23509	Rrm2
24.9244	23.3895	24.8305	24.5921	25.8062	25.8295	25.2816	25.765	-1.23647	Ankrd52
25.0172	24.0148	25.299	25.3298	26.1898	26.4067	25.9417	26.0843	-1.24042	Aen
28.8987	29.1941	28.4494	28.8847	30.326	30.2484	29.8752	29.9523	-1.24377	Gbp2
25.2929	25.3504	25.4156	26.2163	26.6227	27.7653	26.871	26.0212	-1.25124	Recql
24.4345	23.3082	24.907	23.1532	25.5182	25.1069	24.8448	25.3436	-1.25263	Mpp7
27.024	26.9838	26.9994	26.5633	27.9426	27.8587	28.3503	28.4392	-1.25508	Zcchc8
28.1588	28.8307	28.4862	27.9085	29.1353	29.5598	29.7372	29.9807	-1.25721	Eno3
25.1689	25.1958	23.0582	24.6594	25.6114	25.7412	26.0615	25.7027	-1.25865	Xylb
28.8664	28.3582	29.1038	28.4462	30.1527	29.8582	29.9432	29.8627	-1.26053	Ddx56
28.3078	28.1057	28.7101	28.4873	29.8782	29.5552	29.6485	29.5713	-1.26058	Ddx24
24.0674	23.6564	24.8294	24.9628	26.1002	26.0455	25.2902	25.1253	-1.26127	Ndnl2;1700020D05Rik
23.2435	21.7026	23.3173	23.0612	24.2558	23.5142	24.3307	24.2696	-1.26144	H2afy
30.0554	29.9661	29.6702	29.8761	30.8934	31.49	31.1047	31.1294	-1.26241	Alad
27.1932	27.4001	26.2806	27.2896	28.5186	28.6965	27.9658	28.087	-1.27614	Tmem209
26.3011	26.3653	24.4649	26.3627	27.1596	27.3409	26.8374	27.2671	-1.27777	Slc4a1ap
24.2869	24.3726	22.9221	23.6803	25.3515	25.0408	25.0069	24.9886	-1.28148	Orc6
27.4515	26.4457	26.8193	27.3124	28.4845	28.4134	27.8262	28.4436	-1.2847	Ppif
26.1598	26.2864	26.3991	26.5148	27.2818	27.8203	28.1581	27.2456	-1.28643	Baz1a
28.3106	28.0776	28.5301	28.3241	29.8333	29.6697	29.445	29.4759	-1.29542	Ppan
27.7285	26.9666	27.2243	25.9881	28.7171	28.3217	27.9261	28.1256	-1.29574	Morc2a
28.588	28.514	28.6985	28.5494	29.9248	29.8695	29.7314	30.0592	-1.30874	Pus7
25.7091	25.8675	25.7622	25.4342	27.5045	27.0425	26.8291	26.6344	-1.30931	Ncapg2
26.8131	26.7881	27.6837	26.8464	28.3837	28.5245	28.2147	28.248	-1.30993	Rexo4
25.6695	25.6897	26.2796	26.0683	27.7535	27.8181	27.0437	26.3939	-1.32551	Sptlc1
26.4489	26.2236	25.0517	26.5269	27.4277	27.6032	27.424	27.1134	-1.32931	Trmt61a
28.7403	28.0359	28.4053	28.191	29.51	29.9636	29.7441	29.4761	-1.33032	Mdn1
28.7304	28.0928	26.8906	28.7695	29.3521	29.5017	29.8758	29.0788	-1.33125	Lamc1
23.2952	23.803	23.175	22.8236	24.1496	24.9598	24.7126	24.6017	-1.33173	Gtf2a1
23.6555	22.8491	23.754	23.4705	24.4576	24.5414	25.1865	24.888	-1.33613	Pdss1
27.5813	26.2911	26.3739	26.4312	28.3761	28.2323	27.664	27.7524	-1.33684	Rrp9
24.0457	23.031	23.4481	23.5398	24.7203	25.7896	24.5194	24.3863	-1.33776	Reep4
28.1746	27.5198	27.5298	28.0484	29.3184	29.4789	29.3339	28.4927	-1.33786	Utp20
28.0593	28.2606	28.6481	28.617	29.6452	29.2519	29.7058	30.3536	-1.3429	Tpst2
26.8657	26.1605	26.6046	26.5948	28.1005	28.1337	27.7059	27.6619	-1.3441	Dctpp1
25.0781	24.8414	24.672	24.8658	26.6027	26.3102	26.3864	25.5373	-1.34484	Ddx10
24.0108	24.0437	22.7084	23.9524	25.0407	25.295	24.5837	25.1828	-1.34675	Rad9a
23.2054	23.7076	23.4548	23.7246	25.118	24.9602	24.0062	25.4313	-1.35583	Fignl1
25.0994	23.642	24.0571	23.2723	25.1103	25.2174	25.8303	25.3576	-1.3612	Isg20
26.4909	27.2135	27.5395	27.1637	28.3893	28.6434	28.2951	28.5329	-1.36326	Itga3
23.8465	23.3473	23.6424	25.2717	25.9979	25.2673	25.196	25.12	-1.36834	Mea1
25.4145	24.9869	25.4362	25.5888	26.6023	26.9626	26.5546	26.8601	-1.3883	Taf9;Taf9b
31.7994	31.7439	31.5272	31.6229	33.0457	33.0945	33.0908	33.0302	-1.39195	Rnf213
24.7662	24.9794	23.0997	23.7203	25.472	25.8598	25.7563	25.0602	-1.39564	Capn6
25.97	26.0808	26.0693	26.1061	27.3394	27.539	27.5004	27.4347	-1.39682	Gbe1
24.5938	24.3452	23.5708	23.157	26.0206	24.8971	25.1532	25.1851	-1.39731	Immt
27.3988	27.3213	27.4296	27.0554	29.0403	28.5553	28.6424	28.5607	-1.39842	Pgam5
25.7339	25.5422	24.8217	23.4098	26.1677	26.4153	26.2455	26.2828	-1.40094	Noa1
25.0064	23.727	23.0325	23.2142	26.0856	24.8711	24.898	24.7308	-1.40134	Nudt14
23.5869	23.9056	23.7952	23.7487	25.8614	25.3624	23.9851	25.4335	-1.40147	Sptan1
26.4333	25.722	26.0577	26.2421	27.5256	27.4253	27.3743	27.7503	-1.4051	Adi1
26.4629	25.447	26.9768	26.3972	27.9609	27.5436	28.0423	27.3583	-1.40533	Pwp2
27.7074	28.1198	27.5701	28.0611	29.065	29.4959	29.3405	29.195	-1.40948	Psmb8
23.6409	24.0556	24.4526	23.8109	25.6496	25.5341	25.4145	25.0054	-1.41093	Med23
26.8736	26.9523	26.872	27.0031	28.6085	27.7629	28.4067	28.5701	-1.41179
24.8663	23.2922	24.4574	24.407	26.1311	25.1786	25.6454	25.7297	-1.4155	Orc2
22.8114	23.9761	23.6967	24.9165	25.4464	25.4829	24.9665	25.1752	-1.41755	F11r
24.973	23.9714	23.073	24.8731	25.4125	25.3289	26.0148	25.8051	-1.41772	Gbp9
26.2528	26.5015	26.4555	26.9171	28.3164	27.7918	27.7869	27.9508	-1.42979	Tex30
25.4934	25.234	25.3886	25.5841	27.0304	27.0318	26.6195	26.7679	-1.43738	Ezh2
27.8685	27.7506	27.5637	27.5432	29.005	29.3563	29.0651	29.0719	-1.44309	Diaph3;Diap3
23.4849	25.4282	25.0666	23.8006	25.8624	26.1099	25.8099	25.8071	-1.45226	LRWD1;Lrwd1
23.5811	23.3634	23.5964	23.1453	25.0912	24.7575	25.1221	24.5275	-1.45301	Agpat1
23.9457	23.8206	25.4527	25.7337	26.2618	26.1975	25.8086	26.5305	-1.46141	Dsn1
24.7283	25.5098	24.5747	26.0359	26.0348	26.9045	26.3024	27.463	-1.46403	Haus6
31.4499	31.3048	31.516	31.6066	32.9839	33.0325	33.0031	32.7144	-1.46412	Pdlim1
28.8646	28.729	28.0035	28.8433	30.1076	29.9562	30.1529	30.0976	-1.46848	B2m
23.1851	23.6843	23.1135	25.3502	25.4335	25.0275	25.7346	25.0476	-1.47752
26.6129	25.9505	26.6036	25.9532	28.3451	27.663	27.6159	27.4092	-1.47823	Cdk7
24.6711	24.3645	23.4922	23.3798	25.849	25.3811	24.8962	25.7162	-1.4837	Synj1
27.3198	27.0013	26.9905	27.4561	28.6171	28.833	28.8217	28.4392	-1.48581	Pus1
24.2682	23.7363	24.1053	25.103	25.9451	26.1136	25.2227	25.9242	-1.49824	Haus1
24.5493	23.5008	22.8692	24.0517	25.0826	25.0074	25.2222	25.6604	-1.50039	Atm
25.5827	25.4997	25.5841	25.333	26.9741	27.2147	26.7675	27.045	-1.50044	Ddx49
24.4145	23.2663	24.7738	24.4212	25.582	25.6005	25.7803	25.9152	-1.50057	Skp2
25.8838	24.8181	25.1709	25.1679	27.3697	27.4018	25.5892	26.7053	-1.50631	Atp6ap2
27.9768	27.5419	27.9196	28.0328	29.5719	29.3711	29.4004	29.1689	-1.51027	Aatf
26.8019	24.775	25.8351	26.5571	27.2511	27.5825	27.5123	27.7007	-1.51938	Naf1
29.4322	29.8662	29.2237	29.8182	30.9454	31.374	31.3708	30.7751	-1.53126	Nes
24.46	23.0168	23.672	22.1837	25.0893	24.414	25.071	24.9294	-1.54278	Ubxn4
25.9249	23.7966	24.6267	25.9082	26.543	27.4454	26.2994	26.1553	-1.54666	Rsl24d1
22.8511	23.7816	23.5128	23.1029	25.476	25.1553	24.6654	24.1544	-1.55067	Apba3
24.5991	24.3311	23.977	22.631	25.6183	24.8885	25.9761	25.2595	-1.55108	Kctd10
27.5275	26.9893	27.1789	27.4078	28.3532	29.1805	28.8836	28.9124	-1.55656	Morf4l1
22.6648	22.9029	25.1506	24.4652	25.3485	25.7321	25.0293	25.3015	-1.55697	Ctgf
25.7425	25.7291	24.1041	25.6683	26.7327	26.4522	27.0746	27.2155	-1.55772	Gbp10;Gbp6
23.6886	22.8459	23.7535	22.8278	23.8639	25.4168	25.0456	25.0248	-1.55881	Jun
25.5403	23.7332	25.802	23.4818	26.0028	26.3376	26.1087	26.3564	-1.56206	Ccna2
23.4314	22.5541	23.4905	23.4205	24.9266	25.2972	24.8798	24.065	-1.568	Met
26.7334	27.5862	26.8501	27.0771	28.727	29.0388	28.6745	28.1141	-1.5769	Prps2
23.5511	24.92	22.2583	23.6498	25.1095	24.5334	26.0479	24.9995	-1.57777	Dtl
22.4237	24.7387	23.5483	23.273	25.4704	25.1195	25.0844	24.6492	-1.58497	Dhcr24
29.2201	29.137	28.0568	27.7582	30.3166	30.0443	30.4144	29.755	-1.58952	Bst2
25.3083	25.4058	25.3736	25.4277	26.7585	26.7356	27.1966	27.1958	-1.59276	Dck
31.1475	31.2847	31.1756	31.2778	32.9958	32.7448	32.7675	32.7934	-1.60395	Tfrc
26.4777	26.4592	26.2862	26.1336	28.1547	27.872	27.7701	28.0199	-1.61501	Tacc3
26.5852	26.7338	26.4379	26.8307	28.1078	28.5844	28.3365	28.0577	-1.62469	Dpp7
22.1623	23.4253	23.64	23.1677	25.1999	24.7187	24.5253	24.4565	-1.62624	Igsf10
25.4221	25.2776	25.5875	25.8516	26.6301	27.5549	27.5163	26.9944	-1.6392	Ermp1
27.8246	27.7743	28.3571	27.9222	29.6243	29.518	29.6959	29.6279	-1.64697	Rbm19
24.0477	24.0652	23.3071	22.6855	25.1338	25.7734	24.8746	24.9546	-1.65773	Abhd6
24.4453	23.749	23.1873	22.5704	25.9164	24.9607	24.9865	24.721	-1.65817	Hyal2
23.4144	25.3254	22.8965	23.8987	25.0923	25.7599	25.5049	25.8872	-1.67734	Bub1b
24.4718	24.442	24.0294	24.0109	25.6044	26.1148	25.8589	26.1127	-1.68414	Ptpn21
26.8242	27.0467	25.6546	26.8241	28.1675	28.2991	28.6349	27.9867	-1.68467	Mepce
27.2277	26.7081	27.0027	27.016	28.6987	28.739	28.6419	28.6566	-1.69545	Ncapd3
23.9237	23.4308	24.9898	24.056	25.683	25.6607	26.109	25.7339	-1.6966	Ddx41
24.3324	22.5709	24.5662	23.2524	25.3665	25.5409	25.6951	24.9177	-1.69956	Lyrm4
25.4028	25.0549	24.5133	24.8427	26.9285	26.6858	26.0397	26.986	-1.70656	Tgtp1
25.1164	26.4734	24.482	24.3886	26.6316	26.9808	26.9362	26.7987	-1.72169	Slc7a1
26.2273	25.2325	25.9303	25.6124	27.3196	27.9445	27.4519	27.2341	-1.73691	Smc6
28.2863	28.2065	27.8497	27.7813	29.8583	29.6754	30.0381	29.5876	-1.75887	Oas1a;Oas1g
27.5727	27.3366	26.7354	27.983	29.7979	28.7495	29.2804	28.852	-1.76301	Chchd2;Zbed5
25.9678	24.4219	25.479	25.8767	28.217	27.1372	27.3387	26.1137	-1.7653	Ngdn
25.5204	25.0612	24.4237	24.8852	26.7563	27.0866	26.7822	26.328	-1.76567	Ddx55
25.4601	25.5902	23.5935	25.9887	26.7817	26.8425	27.0482	27.0628	-1.77569	Rprd1a
26.1639	26.4338	26.0699	23.6347	27.3518	27.6136	27.2654	27.2354	-1.79102	Polr2f
24.4863	24.3812	23.8075	23.0257	24.9795	25.9271	25.9973	25.9681	-1.79281	Akap8l
25.2016	24.5865	24.6591	23.3346	26.5884	25.2101	26.4358	26.7414	-1.79846	Atad5
25.7775	25.6025	24.9831	25.3384	27.131	26.903	27.6611	27.2199	-1.8034	Dusp9
26.5869	27.0567	26.7723	26.4297	28.4262	28.3246	28.4827	28.8322	-1.805	Fam107b
24.9441	23.27	23.6172	24.176	25.7015	26.2655	25.7587	25.5072	-1.80643	Slu7
26.172	24.9876	25.4341	26.0437	27.8604	27.5194	27.0422	27.4724	-1.81425	Farp2
24.2031	25.1436	23.273	25.1799	26.2774	26.7922	26.0452	25.9699	-1.82125	Elof1
25.0263	23.5751	23.1299	24.9397	25.6314	26.5247	26.4496	25.3855	-1.83005	Med12
26.944	25.3282	27.295	26.8225	29.0088	28.1988	29.0131	27.5592	-1.84757	Noc4l
27.4553	26.94	27.1962	26.7887	29.0339	29.4736	28.6345	28.6415	-1.85086	Dhx37
22.0311	24.082	23.737	23.6965	25.5895	25.9707	24.7403	24.705	-1.86474	Mum1
23.5162	24.3559	24.1327	25.4176	25.6589	26.7735	25.7036	26.7679	-1.87037	Ube2s
26.2368	25.9249	26.1102	26.4059	28.0699	28.0091	28.1571	27.9904	-1.88719	Col8a1
23.903	23.6213	24.244	25.2373	25.9084	26.4277	25.9213	26.3173	-1.89224	Gvin1
21.7153	22.5487	23.8254	22.6567	23.4403	24.0768	25.8293	24.9754	-1.89393	Acy3
26.2126	26.3873	25.7403	25.2033	28.2813	28.0024	27.9039	26.9346	-1.89468	Wdr46
23.7576	24.1029	22.9263	22.4071	25.3638	25.4432	25.2992	24.7093	-1.9054	Ska2
27.2108	27.1433	26.5939	27.741	29.085	28.8222	29.5262	28.8923	-1.90919	Mllt4
25.9936	24.9458	25.7582	22.9008	27.0318	26.5038	26.6651	27.0913	-1.9234	Med31
22.8872	23.1242	23.1551	24.839	25.5036	25.591	25.1307	25.5886	-1.95213	Nrp2
25.8264	25.7895	26.1036	26.835	28.9102	27.8683	28.203	27.3821	-1.95227	Dnttip2
28.3567	28.5173	28.4531	28.2747	29.9704	30.7535	30.3971	30.2965	-1.95393	Cotl1
24.6973	23.6307	24.2052	23.9131	25.2918	27.5161	25.9107	25.594	-1.96658	Rtp4
30.1244	27.1128	29.1229	28.2395	30.9419	30.217	30.1339	31.2449	-1.98454	Arid1a
24.4946	24.6406	23.5301	25.2865	26.9919	26.0804	26.7502	26.0797	-1.9876	Whsc1
22.7635	24.6295	23.9781	23.9506	25.9407	25.6521	26.1072	25.6141	-1.99811	I830012O16Rik;Ifit3
25.8519	26.0678	23.5617	26.6391	27.277	28.1866	27.3582	27.2944	-1.99892	Gcc2
27.4462	26.9428	25.7176	27.2342	28.8445	29.0377	29.1662	28.2996	-2.00183	Lgmn
27.8909	27.8767	27.4912	27.2924	29.379	29.6328	30.0997	29.49	-2.01258	Ivd
23.4855	24.9269	24.9303	25.4478	27.2324	26.1746	26.7686	26.7045	-2.02243	Kif20b
22.8998	22.6982	23.5559	24.5922	25.8042	25.9695	24.7875	25.3387	-2.03842	Tdp1
25.1765	23.7318	23.883	25.6146	25.942	26.1923	27.117	27.3233	-2.0422	Aldoc
25.1793	23.1297	22.7529	24.4835	26.2442	25.3309	25.994	26.2232	-2.06169	Myo6
27.0661	26.9809	27.0839	26.7695	28.9251	29.3862	28.7784	29.0633	-2.06317	Sbno1
23.4827	22.5822	23.9064	24.632	25.6264	26.1431	25.5761	25.5197	-2.0655	Loxl3
24.1257	23.2507	23.497	23.5191	25.5995	25.8683	25.8174	25.3766	-2.06732	Kif18b
27.4369	27.6889	26.3264	27.586	29.2957	29.4309	29.2442	29.3762	-2.0772	Mlkl
25.6039	25.3136	24.3017	24.2895	27.5313	25.9268	26.7035	27.7071	-2.09	Cmpk2
23.8159	23.6403	22.6291	24.0866	25.6667	25.6752	25.1631	26.0329	-2.09149	Ezr
24.2411	25.0793	25.0894	24.7481	27.1536	26.8923	26.2469	27.2594	-2.09859	Adat2
24.6367	23.7273	24.6305	25.0238	26.6878	26.7951	26.7093	26.2408	-2.10366	Bckdhb
26.4798	26.464	23.4087	26.6707	27.0546	28.2411	28.6022	27.543	-2.10443	Mcam
26.2102	24.5921	25.0835	25.712	26.7986	28.0032	28.08	27.181	-2.11627	Cwf19l1
27.6845	27.6558	26.7878	27.919	29.1947	29.909	30.161	29.248	-2.11642	Tapbp
26.2743	26.3102	26.405	26.8251	28.4192	29.2804	28.3006	28.2954	-2.12024	Esf1
28.7918	28.2492	28.9667	28.6996	30.9547	31.0254	30.4929	30.7899	-2.1389	Hells
26.2016	25.0719	23.4762	26.0259	27.602	27.2042	27.6974	27.0621	-2.19754	Tap1
25.2791	24.7216	24.5896	23.501	27.1109	26.3678	26.9717	26.4717	-2.20771	Gprc5a
26.5193	26.41	24.4519	26.6927	27.7029	28.9543	28.9623	27.3056	-2.21277	Tap2
23.34	25.1885	25.2941	25.9278	27.643	25.9324	27.5342	27.4985	-2.21445	Srfbp1
23.4056	22.8193	22.6088	23.4765	24.9834	24.113	26.3926	25.6911	-2.21745	Msh3
22.649	24.7441	23.1219	25.9947	26.2283	26.1773	26.9256	26.1878	-2.25233	Ep400
25.7332	25.417	27.0651	25.0141	30.2199	27.3265	27.5754	27.1265	-2.25476	H2afx
29.8598	29.9568	29.2408	29.6394	31.7255	32.1982	32.0394	31.8329	-2.27479	Isg15
26.4419	26.8152	26.3887	26.5856	28.597	29.1317	28.7425	28.8616	-2.27535	Pak1
25.6253	23.7119	25.9856	26.0187	27.4046	27.7054	28.7431	26.768	-2.31991	Wbscr22
22.0146	23.943	22.428	23.5282	25.2354	25.8459	25.1066	25.0256	-2.32495	Ifit2
28.943	29.0471	28.896	29.1898	31.4594	31.1382	31.4777	31.3237	-2.33081	Bsg
24.6831	24.7918	26.0123	26.0288	27.401	28.3896	28.4565	26.746	-2.36927	Ppil4
25.5917	25.4627	22.9702	23.8075	26.9567	27.3799	26.8237	26.282	-2.40255	Ddx31
27.4591	27.8586	25.6652	27.5507	29.6419	29.7523	29.4606	29.35	-2.41779	Parp9
24.4461	25.0326	24.3303	24.5926	27.7144	27.3505	26.4717	26.5529	-2.42196	Sdad1
23.3471	22.5741	22.5091	24.9195	26.2856	25.7443	25.8158	25.2128	-2.42719	Usp18
26.5586	24.2928	23.4729	25.9047	27.8838	27.1071	27.5407	27.502	-2.45112	Cwf19l2
24.6245	25.0579	25.0511	25.9218	28.213	27.572	27.3342	27.4605	-2.48114	Timeless
23.3865	23.9216	23.8321	23.1404	25.6438	25.4425	27.2309	26.0002	-2.50921	Hip1r
22.8726	22.195	23.7527	25.5447	25.9599	26.1256	26.1129	26.2792	-2.52817	Acp6
25.2796	25.5178	24.2313	24.9252	27.5995	27.4933	27.3764	27.679	-2.54859	Xaf1
23.67	23.314	23.5412	24.9071	26.0342	26.5253	26.7681	26.5062	-2.6004	Cox7a2l
25.2479	25.3696	24.2421	23.015	26.9708	27.0322	27.1111	27.1913	-2.6077	Dynlt3
25.0028	24.8933	23.4407	22.939	26.6427	27.0555	26.8719	26.137	-2.6078	Scarb1
23.705	22.8311	23.9582	22.8285	26.1088	26.9178	25.8512	24.9361	-2.62276	Vps13a
23.8537	23.8739	25.4142	23.6763	27.1952	26.6968	26.5584	26.9553	-2.6469	Rbm38;Rbm24
26.765	25.0448	27.0707	25.7352	28.7294	28.3139	29.2369	28.9809	-2.66134	Trrap
29.411	29.4671	28.3119	29.131	31.9293	31.9129	31.8992	31.3865	-2.70174	Lmnb1
28.8756	29.3555	28.007	28.7019	31.3896	31.7957	31.2036	31.5033	-2.73805	Ifit1
23.7149	22.5919	24.4249	23.5113	26.5709	26.9205	26.0941	25.6761	-2.75462	H2-K1
23.5977	22.5143	23.3572	26.5761	26.6962	26.6596	26.9769	26.7336	-2.75525	Tceb3
23.7168	26.0122	24.3094	22.4317	26.8517	26.5725	27.1963	26.9324	-2.77067	Dhx58
24.6295	26.7133	24.9541	26.899	28.9387	27.7771	28.3729	29.3329	-2.80639	Kif23
23.1223	23.7806	22.9039	26.3467	27.2286	26.8254	26.5812	26.8193	-2.82528	Nelfe
29.2505	29.3682	28.8893	29.2865	32.0194	32.0756	32.1785	31.9267	-2.85141	H2-D1
28.3779	27.7331	27.1843	28.4779	30.8181	30.8333	30.7326	30.8341	-2.86124	Ly75
25.9554	22.9718	23.4761	23.2098	26.4218	27.2559	26.6393	26.7595	-2.86588	Oasl2
25.4069	25.8967	24.3427	25.8905	28.3662	28.3988	28.2213	28.1424	-2.89795
25.3266	23.4236	23.4835	24.8873	27.3673	26.7142	26.6703	28.1286	-2.93984	Dph6
26.8917	26.6447	24.5093	26.7085	29.1001	29.1941	29.0517	29.2031	-2.9487	Cdh2
26.2373	26.1378	25.9019	26.394	28.8633	29.1362	28.9047	29.6234	-2.96414	Hebp1
25.6291	24.3017	24.7381	24.4131	28.701	27.4329	27.9464	27.2773	-3.0689	Cmss1
26.336	24.5086	25.7729	25.5947	28.248	28.6759	29.1981	28.5002	-3.1025	Hpcal1;Hpca
27.2244	27.8533	25.7667	25.3168	29.6443	29.1839	29.7211	30.154	-3.13548	Gbp7
26.1374	25.0135	26.8905	26.833	29.4903	29.8282	28.3274	29.8557	-3.15677	Adh7
21.6084	23.3421	24.3282	23.594	24.7683	27.236	26.4656	27.1775	-3.19367	Polr1b
24.8656	26.022	24.9407	25.2008	27.8231	28.6705	28.7277	28.9585	-3.28768	Apol9a
24.7116	25.1661	24.4064	24.7611	28.9372	27.6958	26.959	28.7426	-3.32237	Iigp1
25.0485	23.7356	23.9409	23.7679	26.9358	27.5257	27.76	27.6005	-3.33228	Snx8
26.2893	25.0517	23.2114	26.029	28.3911	28.679	28.7652	28.3581	-3.40303	Ifih1
29.3729	29.6398	27.9731	29.0225	32.6032	31.9619	32.8331	32.6478	-3.50941	H2-K1
23.6225	24.8401	24.0108	24.4194	27.2646	27.7604	27.4233	28.5452	-3.52516	Nsun5
23.642	23.6038	22.6344	24.0178	27.8707	26.8522	25.772	27.9271	-3.63101	Them6
25.0387	24.1004	25.8427	24.2351	28.4778	28.4996	28.2252	28.8494	-3.70877	Renbp
24.804	22.0787	25.0996	24.0964	28.2829	26.951	28.1947	27.571	-3.73025	Mndal
25.0263	23.198	23.726	23.2254	26.8635	27.7218	27.9062	27.6636	-3.74486	Gphn
23.5107	22.8944	23.4224	25.3742	27.1834	27.4604	27.8504	27.7991	-3.77289	Ttk
23.9406	25.356	23.4916	24.3227	28.055	28.0994	27.979	28.0956	-3.77952	H2-K1
25.2725	25.3453	23.5291	25.2015	28.3339	28.4656	28.915	29.0508	-3.85421	Ifrd1
24.2924	24.6313	25.5527	22.7062	28.0059	28.3784	27.883	28.4193	-3.87598	Uchl1
23.4949	25.7415	22.5699	23.7382	27.7853	27.6463	28.2122	28.1641	-4.06583	Parp10
26.3819	24.1755	27.0714	26.0089	30.0909	30.3298	30.4544	29.4017	-4.15978	Alcam
24.9061	26.1023	25.1606	25.0951	29.8792	29.5252	28.56	30.0291	-4.18235	Tor3a
24.8103	23.7547	24.821	22.4298	28.1451	28.2691	28.2878	28.08	-4.24158	AI607873
25.1606	25.4025	24.3903	25.2891	29.6459	29.3149	29.1457	29.6604	-4.38111	Igtp
24.7861	23.2424	24.5358	24.7858	28.7671	28.7987	29.0515	29.5756	-4.71068	Gbp4
23.6828	23.3501	24.1084	23.7534	28.0155	28.6266	28.4079	28.7155	-4.71768	Cdkn2a
23.1016	24.5912	23.2746	23.9661	28.5084	28.6273	28.7145	28.5239	-4.86017	Isyna1
26.9615	27.2015	26.51	26.8078	30.7421	30.8703	34.9838	30.649	-4.9411	Nono
24.7455	24.8271	23.4619	22.858	28.2978	30.3356	30.2695	28.6074	-5.40448	Dnph1
23.2194	23.2547	22.6735	22.5609	28.7458	28.1727	28.1975	28.4844	-5.47297	Acadl
23.8693	23.9874	24.2279	24.9605	30.321	29.3977	29.6752	30.3683	-5.67928	Cdkn2a
25.7457	24.826	23.4367	24.6196	30.6608	29.766	30.5222	30.4511	-5.69303	Crip2
22.611	24.2218	25.342	22.4656	29.4215	29.5452	29.8137	29.4262	-5.89159	Serpina3i
24.4502	23.9478	21.7743	23.2222	30.7796	27.4875	28.2339	30.477	-5.89584	Trp53;Tp53
24.028	22.1516	24.0801	22.128	29.4114	29.3083	28.6706	28.7109	-5.92835	Serpina3n
25.4229	23.7783	24.3726	25.6745	30.7425	32.4189	30.7445	30.7022	-6.33995	Serpina3g
23.3723	25.2099	25.0791	24.2818	30.9512	30.9678	30.8727	30.7117	-6.39006	H2-L
23.5359	23.8387	24.1393	23.4944	31.418	31.0244	31.1862	31.4484	-7.51715	Klhl7
24.3033	24.8224	22.9886	25.2559	31.805	32.3079	32.1314	32.1654	-7.75989	Lgals3
24.263	23.8864	26.2839	23.2704	33.4685	31.8326	33.5055	31.7562	-8.21476	Trp53
21.8137	21.2869	20.9993	21.6503	33.4782	33.0442	33.0269	33.6125	-11.8529	Crabp1

## Sheet: trascriptomics
Symbol	wt1_unique	wt2_unique	wt3_unique	wt4_unique	ko1_unique	ko2_unique	ko3_unique	ko4_unique	logFC_KOvsWT	FDR_KOvsWT	Protein names	Gene names	Student's T-test Difference KO_WT	EnsemblGeneID	Symbol	logFC_KOvsWT	FDR_KOvsWT
3110039M20Rik	126.34	123.16	131.23	154.93	0	0	0	0	-10.339	3.94704e-142	Non-POU domain-containing octamer-binding protein	Nono	-4.9411	ENSMUSG00000031311	Nono	-10.046	8.86749e-121	No	Nono
Nono	119.82	93.04	116.46	107.87	0	0	0	0	-10.046	8.86749e-121	Alcohol dehydrogenase class 4 mu/sigma chain	Adh7	-3.15677	ENSMUSG00000055301	Adh7	-8.426	1.21022e-246	Nono	Adh7
Ifi202b	70.1	81.52	115.59	93.39	0	0	0	0	-9.744	2.13086e-76	MAGUK p55 subfamily member 7	Mpp7	-1.25263	ENSMUSG00000057440	Mpp7	-6.887	4.77166e-33	No	Mpp7
Shox2	175.24	175.44	164.26	186.79	0.88	0	0	0	-9.54	1.77519e-198	Cellular retinoic acid-binding protein 1	Crabp1	-11.8529	ENSMUSG00000032291	Crabp1	-6.007	0	No	Crabp1
Foxg1	65.21	64.68	71.26	55.02	0	0	0	0	-9.27	3.22076e-75	CD166 antigen	Alcam	-4.15978	ENSMUSG00000022636	Alcam	-5.255	2.57135e-116	No	Alcam
Hoxb9	66.84	55.82	38.24	48.51	0	0	0	0	-8.985	2.18143e-49	Galectin;Galectin-3	Lgals3	-7.75989	ENSMUSG00000050335	Lgals3	-5.088	5.91001e-282	No	Lgals3
Coch	43.2	44.3	40.85	36.92	0	0	0	0	-8.639	2.09194e-53	Tumor suppressor ARF	Cdkn2a	-5.67928	ENSMUSG00000044303	Cdkn2a	-4.963	0	No	Cdkn2a
Adh7	231.48	263.16	261.59	228.05	0	0	0.61	1.51	-8.426	1.21022e-246	Junctional adhesion molecule A	F11r	-1.41755	ENSMUSG00000038235	F11r	-4.746	1.45203e-33	Adh7	F11r
Hoxa11	34.23	47.85	25.2	34.03	0	0	0	0	-8.392	8.09042e-36	Inositol-3-phosphate synthase 1	Isyna1	-4.86017	ENSMUSG00000019139	Isyna1	-3.571	2.01096e-37	No	Isyna1
Hoxa9	35.86	38.1	34.76	20.27	0	0	0	0	-8.298	6.13897e-33	N-acylglucosamine 2-epimerase	Renbp	-3.70877	ENSMUSG00000031387	Renbp	-3.34	1.10908e-80	No	Renbp
Hoxa10	30.97	30.13	22.6	27.51	0	0	0	0	-8.075	4.13994e-36	Ubiquitin-like protein ISG15	Isg15	-2.27479	ENSMUSG00000035692	Isg15	-3.338	2.97082e-197	No	Isg15
Ildr2	89.66	69.11	79.09	73.85	0	0	0.61	0	-7.961	6.75028e-91	Cysteine-rich protein 2	Crip2	-5.69303	ENSMUSG00000006356	Crip2	-3.236	2.47055e-38	No	Crip2
Cadm1	26.08	15.06	26.94	23.17	0	0	0	0	-7.793	1.88181e-26	Neuropilin-2	Nrp2	-1.95213	ENSMUSG00000025969	Nrp2	-3.221	2.15579e-42	No	Nrp2
Prelid3a	17.93	19.49	27.81	24.62	0	0	0	0	-7.769	3.65552e-25	H-2 class I histocompatibility antigen, K-D alpha chain	H2-K1	-3.77952	ENSMUSG00000061232	H2-K1	-3.128	2.87493e-201	No	H2-K1
Otx1	25.27	17.72	23.47	19.55	0	0	0	0	-7.704	3.89622e-28	Cell cycle checkpoint control protein RAD9A	Rad9a	-1.34675	ENSMUSG00000024824	Rad9a	-3.115	2.69845e-49	No	Rad9a
Phf11d	13.04	19.49	19.12	21	0	0	0	0	-7.465	1.28018e-22	Ubiquitin carboxyl-terminal hydrolase isozyme L1	Uchl1	-3.87598	ENSMUSG00000029223	Uchl1	-3.098	2.77369e-39	No	Uchl1
C130021I20Rik	17.12	11.52	19.99	10.86	0	0	0	0	-7.169	2.33454e-17		Apol9a	-3.28768	ENSMUSG00000057346	Apol9a	-3.052	5.61305e-67	No	Apol9a
Nova1	21.19	14.18	10.43	12.31	0	0	0	0	-7.137	5.30466e-17	High affinity cationic amino acid transporter 1	Slc7a1	-1.72169	ENSMUSG00000041313	Slc7a1	-2.964	6.73863e-171	No	Slc7a1
Lhx2	13.04	13.29	19.12	10.14	0	0	0	0	-7.067	3.98086e-17	Interferon-induced protein with tetratricopeptide repeats 1	Ifit1	-2.73805	ENSMUSG00000034459	Ifit1	-2.777	1.03284e-83	No	Ifit1
Nr1h5	13.86	13.29	10.43	15.93	0	0	0	0	-7.034	3.35649e-18		Gbp9	-1.41772	ENSMUSG00000029298	Gbp9	-2.773	2.31371e-15	No	Gbp9
Mpp7	35.86	41.64	27.81	31.13	0	0	0	3.02	-6.887	4.77166e-33	H-2 class I histocompatibility antigen, D-B alpha chain	H2-D1	-2.85141	ENSMUSG00000073411	H2-D1	-2.741	3.13908e-298	Mpp7	H2-D1
Rbm20	11.41	14.18	3.48	15.2	0	0	0	0	-6.802	6.88817e-12	Cap-specific mRNA (nucleoside-2-O-)-methyltransferase 1	Cmtr1	-1.07045	ENSMUSG00000024019	Cmtr1	-2.669	3.70579e-38	No	Cmtr1
Oasl1	14.67	7.97	13.04	8.69	0	0	0	0	-6.753	9.50332e-14	Heme-binding protein 1	Hebp1	-2.96414	ENSMUSG00000042770	Hebp1	-2.602	4.55787e-15	No	Hebp1
Hectd2	10.6	11.52	15.64	5.07	0	0	0	0	-6.69	6.92915e-12	Cadherin-2	Cdh2	-2.9487	ENSMUSG00000024304	Cdh2	-2.569	5.43081e-43	No	Cdh2
Hoxd8	13.04	11.52	8.69	8.69	0	0	0	0	-6.671	1.02916e-14	2-5-oligoadenylate synthase-like protein 2	Oasl2	-2.86588	ENSMUSG00000029561	Oasl2	-2.56	5.40278e-25	No	Oasl2
Elovl3	11.41	8.86	8.69	11.58	0	0	0	0	-6.641	1.41571e-15	Torsin-3A	Tor3a	-4.18235	ENSMUSG00000060519	Tor3a	-2.482	4.54978e-38	No	Tor3a
Shroom2	4.08	15.06	10.43	9.41	0	0	0	0	-6.566	1.80016e-10	Ubl carboxyl-terminal hydrolase 18	Usp18	-2.42719	ENSMUSG00000030107	Usp18	-2.468	7.11171e-57	No	Usp18
Slc35f2	12.23	7.97	10.43	7.96	0	0	0	0	-6.553	6.502e-14	Gephyrin;Molybdopterin adenylyltransferase;Molybdopterin molybdenumtransferase	Gphn	-3.74486	ENSMUSG00000047454	Gphn	-2.443	7.77367e-19	No	Gphn
Zfp984	6.52	7.97	9.56	12.31	0	0	0	0	-6.484	2.6422e-12		Igtp	-4.38111	ENSMUSG00000078853	Igtp	-2.441	1.62439e-23	No	Igtp
Cystm1	11.41	5.32	8.69	9.41	0	0	0	0	-6.42	1.1283e-11	XIAP-associated factor 1	Xaf1	-2.54859	ENSMUSG00000040483	Xaf1	-2.432	2.08117e-22	No	Xaf1
Bhlhb9	43.2	40.76	39.98	43.44	0.88	0	0.61	0	-6.329	1.5798e-56		Dusp9	-1.8034	ENSMUSG00000031383	Dusp9	-2.43	1.36561e-05	No	Dusp9
Hoxb7	8.15	10.63	5.21	8.69	0	0	0	0	-6.322	3.82029e-11		Gbp7	-3.13548	ENSMUSG00000040253	Gbp7	-2.407	5.89082e-52	No	Gbp7
Tbx5	8.15	11.52	6.95	5.79	0	0	0	0	-6.295	8.66818e-11	tRNA-specific adenosine deaminase 2	Adat2	-2.09859	ENSMUSG00000019808	Adat2	-2.372	2.99925e-22	No	Adat2
Pax3	20.38	23.92	23.47	18.82	0	0	0	0.75	-6.26	9.28481e-28	Nucleolar protein 14	Nop14	-1.10141	ENSMUSG00000036693	Nop14	-2.298	2.34837e-171	No	Nop14
Tbx20	8.15	7.97	6.08	7.24	0	0	0	0	-6.173	1.61983e-11	Lysophosphatidic acid phosphatase type 6	Acp6	-2.52817	ENSMUSG00000028093	Acp6	-2.284	9.74172e-17	No	Acp6
Ctsk	7.34	8.86	6.95	5.79	0	0	0	0	-6.136	2.37135e-10	Sorting nexin-8	Snx8	-3.33228	ENSMUSG00000029560	Snx8	-2.27	9.20382e-81	No	Snx8
Maats1	13.04	24.81	14.77	16.65	4.4	0	0	0	-6.135	1.3251e-16	Retinoic acid-induced protein 3	Gprc5a	-2.20771	ENSMUSG00000046733	Gprc5a	-2.249	1.44661e-22	No	Gprc5a
Eomes	5.71	6.2	7.82	8.69	0	0	0	0	-6.131	8.81085e-11	Ezrin	Ezr	-2.09149	ENSMUSG00000052397	Ezr	-2.208	7.2915e-06	No	Ezr
Eml5	7.34	7.97	8.69	4.34	0	0	0	0	-6.1	1.31142e-09	Interferon-induced helicase C domain-containing protein 1	Ifih1	-3.40303	ENSMUSG00000026896	Ifih1	-2.106	9.95943e-21	No	Ifih1
Hoxc9	13.86	16.84	19.99	13.03	0.88	0	0	0	-6.07	8.05924e-19	Cell surface glycoprotein MUC18	Mcam	-2.10443	ENSMUSG00000032135	Mcam	-2.099	2.04226e-06	No	Mcam
Crabp1	385.53	374.8	407.6	364.16	4.4	7.24	2.43	7.54	-6.007	0	Lymphocyte antigen 75	Ly75	-2.86124	ENSMUSG00000026980	Ly75	-2.046	2.05345e-48	Crabp1	Ly75
Usp44	4.08	7.09	10.43	4.34	0	0	0	0	-5.975	2.6949e-08	Double-stranded RNA-specific adenosine deaminase	Adar	-1.17491	ENSMUSG00000027951	Adar	-2.038	1.7327e-17	No	Adar
Ucp2	70.1	54.94	67.79	49.23	2.64	0.91	0	0.75	-5.949	6.24032e-55	Protein CMSS1	Cmss1	-3.0689	ENSMUSG00000022748	Cmss1	-2.033	2.26359e-15	No	Cmss1
Atf3	108.4	106.33	85.17	92.67	4.4	1.81	1.21	0	-5.919	1.28051e-89	Probable ATP-dependent RNA helicase DHX58	Dhx58	-2.77067	ENSMUSG00000017830	Dhx58	-2.026	6.09431e-05	No	Dhx58
Hoxb8	3.26	10.63	6.08	5.07	0	0	0	0	-5.917	1.0992e-07	U3 small nucleolar RNA-interacting protein 2	Rrp9	-1.33684	ENSMUSG00000041506	Rrp9	-2.021	3.47039e-33	No	Rrp9
Lmx1b	5.71	8.86	2.61	7.24	0	0	0	0	-5.911	3.56522e-08	ATP-dependent RNA helicase DDX51	Ddx51	-1.18508	ENSMUSG00000029504	Ddx51	-1.984	2.44968e-07	No	Ddx51
Gm43517	5.71	6.2	4.35	7.96	0	0	0	0	-5.91	3.32892e-09	Mixed lineage kinase domain-like protein	Mlkl	-2.0772	ENSMUSG00000012519	Mlkl	-1.979	4.07122e-13	No	Mlkl
Fgf21	4.89	5.32	3.48	10.86	0	0	0	0	-5.9	1.7921e-07	Periodic tryptophan protein 2 homolog	Pwp2	-1.40533	ENSMUSG00000032834	Pwp2	-1.974	6.18423e-21	No	Pwp2
Fzd6	8.15	3.54	3.48	7.96	0	0	0	0	-5.849	9.38858e-08	Helicase with zinc finger domain 2	Helz2	-1.21665	ENSMUSG00000027580	Helz2	-1.907	3.84035e-07	No	Helz2
AC123954.1	15.49	15.95	19.99	18.1	0	0	0.61	0	-5.804	1.01238e-23	Protein NDRG1	Ndrg1	-1.08589	ENSMUSG00000005125	Ndrg1	-1.863	5.47015e-46	No	Ndrg1
Slc35g1	7.34	4.43	6.08	4.34	0	0	0	0	-5.765	1.90266e-08	1,2-dihydroxy-3-keto-5-methylthiopentene dioxygenase	Adi1	-1.4051	ENSMUSG00000020629	Adi1	-1.862	1.16116e-10	No	Adi1
Myo1h	6.52	5.32	6.95	2.9	0	0	0	0	-5.72	1.4075e-07	Deoxycytidine kinase	Dck	-1.59276	ENSMUSG00000029366	Dck	-1.855	5.52147e-10	No	Dck
Gm10260	30.97	31.9	56.49	38.37	0.88	0.91	0.61	0	-5.682	1.92324e-33	Protein SDA1 homolog	Sdad1	-2.42196	ENSMUSG00000029415	Sdad1	-1.846	5.80841e-54	No	Sdad1
Trabd2b	14.67	10.63	19.12	18.82	0	0	0.61	0	-5.678	1.52598e-18		H1fx	-1.14367	ENSMUSG00000044927	H1fx	-1.842	4.01584e-32	No	H1fx
Ptprq	8.15	2.66	6.95	2.9	0	0	0	0	-5.661	1.30191e-06	Receptor-transporting protein 4	Rtp4	-1.96658	ENSMUSG00000033355	Rtp4	-1.839	4.22197e-29	No	Rtp4
Zfp991	11.41	8.86	18.25	10.14	0.88	0	0	0	-5.654	4.72914e-13		Pus7	-1.30874	ENSMUSG00000057541	Pus7	-1.835	6.14479e-34	No	Pus7
Lef1	3.26	4.43	5.21	6.52	0	0	0	0	-5.593	2.65554e-07	Serine/threonine-protein phosphatase PGAM5, mitochondrial	Pgam5	-1.39842	ENSMUSG00000029500	Pgam5	-1.834	4.30599e-18	No	Pgam5
Gm7324	21.19	15.06	33.89	29.68	0.88	0	0.61	0	-5.589	3.68916e-22	N-acyl-aromatic-L-amino acid amidohydrolase (carboxylate-forming)	Acy3	-1.89393	ENSMUSG00000024866	Acy3	-1.818	0.000503247	No	Acy3
Cxcl10	128.78	113.42	152.09	135.38	0.88	1.81	2.43	4.52	-5.581	7.6704e-118	Protein FAM107B	Fam107b	-1.805	ENSMUSG00000026655	Fam107b	-1.811	5.22881e-06	No	Fam107b
Hap1	15.49	10.63	10.43	7.96	0	1.81	0	0	-5.562	3.95549e-12	Gem-associated protein 2	Gemin2	-1.12749	ENSMUSG00000060121	Gemin2	-1.786	1.20602e-07	No	Gemin2
Hoxd9	6.52	2.66	5.21	4.34	0	0	0	0	-5.535	8.35935e-07	Vacuolar protein sorting-associated protein 13A	Vps13a	-2.62276	ENSMUSG00000046230	Vps13a	-1.763	1.12394e-25	No	Vps13a
Gpat3	9.78	7.97	14.77	18.1	0	0	0	1.51	-5.483	4.00392e-12	RRP12-like protein	Rrp12	-1.11038	ENSMUSG00000035049	Rrp12	-1.753	2.54668e-13	No	Rrp12
Ces2e	8.15	3.54	1.74	4.34	0	0	0	0	-5.463	6.57289e-06	Nucleolar complex protein 4 homolog	Noc4l	-1.84757	ENSMUSG00000033294	Noc4l	-1.742	9.40348e-28	No	Noc4l
Sycp1	3.26	1.77	4.35	10.14	0	0	0	0	-5.461	1.30582e-05	ESF1 homolog	Esf1	-2.12024	ENSMUSG00000045624	Esf1	-1.713	2.92295e-116	No	Esf1
Mab21l1	5.71	6.2	4.35	1.45	0	0	0	0	-5.428	5.66638e-06	Lymphocyte-specific helicase	Hells	-2.1389	ENSMUSG00000025001	Hells	-1.711	2.78794e-130	No	Hells
Gm7292	6.52	4.43	5.21	1.45	0	0	0	0	-5.424	5.32147e-06		Parp10	-4.06583	ENSMUSG00000063268	Parp10	-1.702	1.74939e-09	No	Parp10
Dclk2	8.15	5.32	18.25	10.86	0	0.91	0	0	-5.418	1.08328e-09	A-kinase anchor protein 8-like	Akap8l	-1.79281	ENSMUSG00000002625	Akap8l	-1.699	3.9058e-29	No	Akap8l
Reep6	37.49	72.66	56.49	54.3	0	2.72	1.21	0.75	-5.415	2.69035e-41	Testis-expressed sequence 30 protein	Tex30	-1.42979	ENSMUSG00000026049	Tex30	-1.68	6.85247e-10	No	Tex30
Extl1	3.26	6.2	3.48	4.34	0	0	0	0	-5.411	1.23536e-06	Probable RNA-binding protein 19	Rbm19	-1.64697	ENSMUSG00000029594	Rbm19	-1.673	1.94227e-16	No	Rbm19
Hoxd3os1	6.52	3.54	2.61	4.34	0	0	0	0	-5.405	1.83683e-06	Interferon-induced, double-stranded RNA-activated protein kinase	Eif2ak2	-1.22919	ENSMUSG00000024079	Eif2ak2	-1.658	7.17056e-24	No	Eif2ak2
Nts	3.26	3.54	6.08	3.62	0	0	0	0	-5.344	2.81349e-06	Nestin	Nes	-1.53126	ENSMUSG00000004891	Nes	-1.629	4.25214e-41	No	Nes
Myom2	2.45	2.66	5.21	5.07	0	0	0	0	-5.263	7.48767e-06	Ras association domain-containing protein 1	Rassf1	-1.2159	ENSMUSG00000010067	Rassf1	-1.625	1.20037e-46	No	Rassf1
Alcam	136.93	142.66	190.33	141.18	4.4	3.62	4.25	1.51	-5.255	2.57135e-116	Ribosome maturation protein SBDS	Sbds	-1.00922	ENSMUSG00000025337	Sbds	-1.624	4.2767e-26	Alcam	Sbds
Grtp1	11.41	13.29	13.04	8.69	0	0	0.61	0	-5.209	6.48397e-15	Protein-tyrosine-phosphatase;Tyrosine-protein phosphatase non-receptor type 21	Ptpn21	-1.68414	ENSMUSG00000021009	Ptpn21	-1.607	7.23343e-13	No	Ptpn21
Car6	46.46	41.64	39.98	41.27	0.88	1.81	0.61	0.75	-5.204	4.75751e-52		Haus6	-1.46403	ENSMUSG00000038047	Haus6	-1.606	7.38791e-25	No	Haus6
Rwdd2a	1.63	5.32	4.35	3.62	0	0	0	0	-5.197	8.42941e-06	Delta-aminolevulinic acid dehydratase	Alad	-1.26241	ENSMUSG00000028393	Alad	-1.588	3.00144e-18	No	Alad
Ndn	3.26	3.54	3.48	4.34	0	0	0	0	-5.191	5.65869e-06	HAUS augmin-like complex subunit 1	Haus1	-1.49824	ENSMUSG00000041840	Haus1	-1.584	5.42816e-14	No	Haus1
Hoxc6	4.08	1.77	1.74	7.24	0	0	0	0	-5.188	3.83155e-05	Serum response factor-binding protein 1	Srfbp1	-2.21445	ENSMUSG00000024528	Srfbp1	-1.576	6.04333e-05	No	Srfbp1
Smim20	10.6	4.43	6.08	12.31	2.64	0	0	0	-5.148	2.65756e-08	E3 ubiquitin-protein ligase RNF213	Rnf213	-1.39195	ENSMUSG00000070327	Rnf213	-1.563	1.77541e-25	No	Rnf213
C1ql1	8.15	2.66	3.48	1.45	0	0	0	0	-5.148	6.26516e-05	Coactosin-like protein	Cotl1	-1.95393	ENSMUSG00000031827	Cotl1	-1.556	2.28731e-25	No	Cotl1
Plcl1	2.45	4.43	5.21	2.17	0	0	0	0	-5.119	1.18504e-05		Mdn1	-1.33032	ENSMUSG00000058006	Mdn1	-1.55	1.77982e-44	No	Mdn1
Hoxc13	2.45	3.54	4.35	3.62	0	0	0	0	-5.113	6.95193e-06	Poly [ADP-ribose] polymerase 14	Parp14	-1.05059	ENSMUSG00000034422	Parp14	-1.536	3.73082e-19	No	Parp14
Oas2	2.45	1.77	6.08	3.62	0	0	0	0	-5.112	3.04495e-05	E3 ubiquitin-protein ligase DTX3L	Dtx3l	-1.17672	ENSMUSG00000049502	Dtx3l	-1.521	8.30869e-17	No	Dtx3l
Lgals3	392.05	419.99	369.36	419.91	9.67	10.86	15.17	5.28	-5.088	5.91001e-282	Probable dimethyladenosine transferase	Dimt1	-1.04091	ENSMUSG00000021692	Dimt1	-1.506	0.00387415	Lgals3	Dimt1
Epb41l4a	13.04	25.7	19.99	24.62	0	1.81	0.61	0	-5.057	7.26345e-19	PDZ and LIM domain protein 1	Pdlim1	-1.46412	ENSMUSG00000055044	Pdlim1	-1.501	4.27853e-33	No	Pdlim1
St3gal6	1.63	7.97	2.61	2.9	0	0	0	0	-5.057	9.37047e-05	DNA-directed RNA polymerase III subunit RPC8	Polr3h	-1.14586	ENSMUSG00000022476	Polr3h	-1.472	1.81536e-20	No	Polr3h
Col4a6	4.89	2.66	4.35	1.45	0	0	0	0	-5.036	4.19976e-05	Condensin-2 complex subunit G2	Ncapg2	-1.30931	ENSMUSG00000042029	Ncapg2	-1.454	2.35432e-18	No	Ncapg2
Rsad2	94.55	85.06	110.37	100.63	0	5.43	4.25	0.75	-5.027	1.31521e-84	Interferon-related developmental regulator 1	Ifrd1	-3.85421	ENSMUSG00000001627	Ifrd1	-1.401	2.95606e-52	No	Ifrd1
Hvcn1	1.63	3.54	1.74	5.79	0	0	0	0	-5.011	7.58143e-05	Amyloid beta A4 precursor protein-binding family A member 3	Apba3	-1.55067	ENSMUSG00000004931	Apba3	-1.4	4.77507e-06	No	Apba3
Cdkn2a	561.59	557.33	603.14	555.29	21.1	13.58	10.31	20.36	-4.963	0	Poly [ADP-ribose] polymerase 9	Parp9	-2.41779	ENSMUSG00000022906	Parp9	-1.395	2.45782e-12	Cdkn2a	Parp9
Ddx60	92.92	63.8	92.99	68.05	6.16	0.91	1.82	2.26	-4.962	2.14643e-55	Peptidyl-prolyl cis-trans isomerase F, mitochondrial	Ppif	-1.2847	ENSMUSG00000021868	Ppif	-1.388	1.81194e-05	No	Ppif
Mef2c	3.26	3.54	4.35	1.45	0	0	0	0	-4.945	4.50222e-05	Protein timeless homolog	Timeless	-2.48114	ENSMUSG00000039994	Timeless	-1.368	2.07645e-26	No	Timeless
B230312C02Rik	2.45	2.66	5.21	2.17	0	0	0	0	-4.945	7.77724e-05	Integrin alpha-3;Integrin alpha-3 heavy chain;Integrin alpha-3 light chain	Itga3	-1.36326	ENSMUSG00000001507	Itga3	-1.356	1.0673e-08	No	Itga3
9330102E08Rik	1.63	2.66	1.74	6.52	0	0	0	0	-4.915	0.000208576	Tapasin	Tapbp	-2.11642	ENSMUSG00000024308	Tapbp	-1.355	1.03626e-30	No	Tapbp
Gm7879	4.08	1.77	4.35	1.45	0	0	0	0	-4.848	0.000137433	Tetratricopeptide repeat protein 39B	Ttc39b	-1.12738	ENSMUSG00000038172	Ttc39b	-1.34	3.59727e-19	No	Ttc39b
Jmjd7	15.49	15.95	13.91	14.48	0	0.91	0.61	0	-4.846	6.44219e-19	Probable 28S rRNA (cytosine-C(5))-methyltransferase	Nsun5	-3.52516	ENSMUSG00000000916	Nsun5	-1.332	0.00802444	No	Nsun5
Eno4	1.63	3.54	3.48	2.9	0	0	0	0	-4.843	6.9729e-05	ATPase family AAA domain-containing protein 5	Atad5	-1.79846	ENSMUSG00000017550	Atad5	-1.33	6.39069e-20	No	Atad5
B4galnt2	2.45	3.54	2.61	2.9	0	0	0	0	-4.842	5.84398e-05	Transmembrane protein 209	Tmem209	-1.27614	ENSMUSG00000029782	Tmem209	-1.317	7.61482e-10	No	Tmem209
Isl2	3.26	1.77	2.61	3.62	0	0	0	0	-4.836	8.63038e-05		Dhx37	-1.85086	ENSMUSG00000029480	Dhx37	-1.306	0.00010228	No	Dhx37
Gpr141	4.89	6.2	8.69	6.52	0	0.91	0	0	-4.831	1.08833e-08	Origin recognition complex subunit 2	Orc2	-1.4155	ENSMUSG00000026037	Orc2	-1.305	5.40278e-25	No	Orc2
F11r	44.83	66.45	36.5	41.27	0	0	3.03	2.26	-4.746	1.45203e-33	DNA-directed RNA polymerase I subunit RPA2	Polr1b	-3.19367	ENSMUSG00000027395	Polr1b	-1.304	1.18504e-05	F11r	Polr1b
Gm45495	2.45	2.66	2.61	2.9	0	0	0	0	-4.738	9.9189e-05	Mediator of RNA polymerase II transcription subunit 31	Med31	-1.9234	ENSMUSG00000020801	Med31	-1.301	3.47092e-07	No	Med31
Gm10644	1.63	2.66	3.48	2.9	0	0	0	0	-4.738	0.00010712	tRNA (adenine(58)-N(1))-methyltransferase catalytic subunit TRMT61A	Trmt61a	-1.32931	ENSMUSG00000060950	Trmt61a	-1.301	1.07425e-08	No	Trmt61a
Rbm38	13.86	27.47	18.25	18.1	0	0.91	0	3.02	-4.723	7.02006e-16	Antigen peptide transporter 2	Tap2	-2.21277	ENSMUSG00000024339	Tap2	-1.288	0.000795907	No	Tap2
Nrgn	12.23	5.32	2.61	5.79	0	2.72	0	0	-4.657	7.47958e-06	Denticleless protein homolog	Dtl	-1.57777	ENSMUSG00000037474	Dtl	-1.281	6.53186e-23	No	Dtl
Epha3	2.45	1.77	3.48	2.17	0	0	0	0	-4.628	0.000268605	Interferon-induced guanylate-binding protein 2	Gbp2	-1.24377	ENSMUSG00000028270	Gbp2	-1.28	2.46282e-08	No	Gbp2
Soat2	2.45	7.09	10.43	3.62	1.76	0	0	0	-4.566	1.66338e-05	DNA primase large subunit	Prim2	-1.02769	ENSMUSG00000026134	Prim2	-1.269	1.67962e-09	No	Prim2
Atp2a3	6.52	5.32	6.95	7.24	0	0	0	0.75	-4.561	1.18741e-08	Peptidyl-prolyl cis-trans isomerase-like 4	Ppil4	-2.36927	ENSMUSG00000015757	Ppil4	-1.246	1.34523e-22	No	Ppil4
Foxf2	2.45	2.66	1.74	2.17	0	0	0	0	-4.507	0.000517869	Legumain	Lgmn	-2.00183	ENSMUSG00000021190	Lgmn	-1.244	1.15214e-06	No	Lgmn
Avil	22.82	11.52	13.04	18.1	0.88	0	1.21	0	-4.505	1.63105e-15	DNA primase small subunit;DNA primase	Prim1	-1.17255	ENSMUSG00000025395	Prim1	-1.24	2.972e-23	No	Prim1
Ppm1e	1.63	2.66	1.74	2.9	0	0	0	0	-4.505	0.000413291		Taf15	1.61338	ENSMUSG00000020680	Taf15	-1.234	2.56835e-20	No	Taf15
Acad10	1.63	1.77	2.61	2.9	0	0	0	0	-4.503	0.000612425	Probable ribosome biogenesis protein RLP24	Rsl24d1	-1.54666	ENSMUSG00000032215	Rsl24d1	-1.216	1.28304e-14	No	Rsl24d1
Tenm4	9.78	9.75	22.6	10.14	0	0.91	0	0.75	-4.495	4.49259e-11	tRNA pseudouridine synthase A, mitochondrial;tRNA pseudouridine synthase	Pus1	-1.48581	ENSMUSG00000029507	Pus1	-1.213	5.5159e-05	No	Pus1
Lat2	1.63	6.2	8.69	7.96	0	0	0	0.75	-4.463	2.53036e-06	Endoplasmic reticulum metallopeptidase 1	Ermp1	-1.6392	ENSMUSG00000046324	Ermp1	-1.194	4.35943e-07	No	Ermp1
B3gnt2	1.63	6.2	6.95	5.79	7.03	0	0	0	-4.419	1.15255e-05	ATP-dependent RNA helicase DDX54	Ddx54	-1.05763	ENSMUSG00000029599	Ddx54	-1.19	7.18494e-14	No	Ddx54
Pianp	9.78	4.43	5.21	6.52	0	0	0.61	0	-4.408	6.2867e-08	FERM, RhoGEF and pleckstrin domain-containing protein 2	Farp2	-1.81425	ENSMUSG00000034066	Farp2	-1.175	0.0382574	No	Farp2
Depdc7	10.6	5.32	2.61	7.24	0	0	0.61	0	-4.406	8.11403e-07	Interferon regulatory factor 9	Irf9	-1.05943	ENSMUSG00000002325	Irf9	-1.174	1.43797e-22	No	Irf9
D5Ertd605e	2.45	2.66	1.74	1.45	0	0	0	0	-4.378	0.000784045	Amyloid protein-binding protein 2	Appbp2	-1.15938	ENSMUSG00000018481	Appbp2	-1.166	2.03439e-12	No	Appbp2
Bdkrb2	8.97	3.54	3.48	7.96	0	0	0.61	0	-4.309	1.00579e-06	Nicotinamide phosphoribosyltransferase	Nampt	-1.16106	ENSMUSG00000020572	Nampt	-1.162	7.74984e-28	No	Nampt
Tspan7	2.45	7.09	2.61	6.52	2.64	0	0	0	-4.302	4.61059e-05	Interferon-induced protein with tetratricopeptide repeats 2	Ifit2	-2.32495	ENSMUSG00000045932	Ifit2	-1.16	0.00186973	No	Ifit2
Rcor2	48.9	63.8	73	31.86	2.64	5.43	1.21	2.26	-4.278	1.21184e-29	Pyrroline-5-carboxylate reductase 1, mitochondrial	Pycr1	1.8238	ENSMUSG00000025140	Pycr1	-1.158	3.90216e-10	No	Pycr1
Angptl6	80.69	89.49	88.65	105.7	6.16	3.62	3.03	4.52	-4.276	8.10092e-75	Scavenger receptor class B member 1	Scarb1	-2.6078	ENSMUSG00000037936	Scarb1	-1.156	9.09865e-07	No	Scarb1
Pcolce2	22.01	36.33	25.2	18.82	3.52	0	1.82	0	-4.247	2.59258e-18	Uridine diphosphate glucose pyrophosphatase	Nudt14	-1.40134	ENSMUSG00000002804	Nudt14	-1.155	0.000620211	No	Nudt14
Cdh3	8.15	4.43	6.95	7.96	0	0	1.21	0	-4.237	5.37919e-08	Malignant T-cell-amplified sequence 2	Mcts2	-1.13263	ENSMUSG00000042814	Mcts2	-1.152	6.57289e-06	No	Mcts2
Slc37a2	4.08	5.32	3.48	4.34	0	2.72	0	0	-4.218	1.73726e-05	Ribose-phosphate pyrophosphokinase 2	Prps2	-1.5769	ENSMUSG00000025742	Prps2	-1.152	5.49399e-07	No	Prps2
Vegfc	21.19	16.84	19.12	13.03	0.88	0.91	0	1.51	-4.216	1.76238e-17	Thioredoxin-like protein 4A	Txnl4a	-1.02486	ENSMUSG00000057130	Txnl4a	-1.127	2.12468e-21	No	Txnl4a
Dusp28	1.63	8.86	6.08	2.17	1.76	0	0	0	-4.199	0.000253479	Alpha/beta hydrolase domain-containing protein 17B	Abhd17b	-1.20121	ENSMUSG00000047368	Abhd17b	-1.124	4.66473e-20	No	Abhd17b
Gm20219	0.82	7.97	5.21	3.62	0	1.81	0	0	-4.196	0.000229357	Enoyl-CoA hydratase domain-containing protein 2, mitochondrial	Echdc2	-1.08157	ENSMUSG00000028601	Echdc2	-1.124	6.34201e-09	No	Echdc2
Flt1	66.02	43.42	58.23	68.78	0	1.81	3.64	5.28	-4.162	1.03947e-41	Diphthine--ammonia ligase	Dph6	-2.93984	ENSMUSG00000057147	Dph6	-1.108	1.33282e-09	No	Dph6
H2-T23	3.26	7.09	6.08	9.41	0	0	1.21	0	-4.136	1.67161e-06	Protein-tyrosine sulfotransferase 2	Tpst2	-1.3429	ENSMUSG00000029344	Tpst2	-1.09	6.93567e-10	No	Tpst2
Map2	18.75	23.92	25.2	21.72	1.76	0	3.64	0	-4.131	5.50175e-20		Morc3	-1.02122	ENSMUSG00000039456	Morc3	-1.088	3.20995e-09	No	Morc3
Oas1g	4.89	1.77	6.08	2.9	0.88	0	0	0	-4.067	8.06587e-05	dCTP pyrophosphatase 1	Dctpp1	-1.3441	ENSMUSG00000042462	Dctpp1	-1.087	5.62775e-19	No	Dctpp1
Amz1	4.89	5.32	0.87	4.34	0	5.43	0	0	-4.055	0.000148118	Protein strawberry notch homolog 1	Sbno1	-2.06317	ENSMUSG00000038095	Sbno1	-1.087	7.41195e-48	No	Sbno1
Ciart	15.49	17.72	11.3	17.38	0	0.91	0.61	1.51	-4.053	3.65686e-16	Polycomb protein Suz12	Suz12	-1.0541	ENSMUSG00000017548	Suz12	-1.085	5.63777e-37	No	Suz12
Kif5a	2.45	5.32	5.21	5.07	0	0	0	0.75	-4.027	8.69773e-06	Chromatin assembly factor 1 subunit A	Chaf1a	-1.13587	ENSMUSG00000002835	Chaf1a	-1.074	8.72457e-19	No	Chaf1a
Prkg2	126.34	164.81	146.87	136.83	8.79	19.01	7.28	6.03	-3.961	5.1677e-88	Interferon-inducible GTPase 1	Iigp1	-3.32237	ENSMUSG00000054072	Iigp1	-1.072	2.05537e-10	No	Iigp1
Trpc1	8.97	15.95	13.91	17.38	0.88	0	0.61	1.51	-3.914	4.28513e-13	Protein kinase C iota type	Prkci	-1.04539	ENSMUSG00000037643	Prkci	-1.067	9.90459e-07	No	Prkci
Slc45a3	5.71	1.77	4.35	4.34	0	0	0	0.75	-3.885	3.92501e-05	Proteasome subunit beta type-8;Proteasome subunit beta type	Psmb8	-1.40948	ENSMUSG00000024338	Psmb8	-1.062	4.15331e-10	No	Psmb8
Taf7l	6.52	6.2	9.56	7.96	0	0.91	0.61	0	-3.875	4.86826e-09	Protein BUD31 homolog	Bud31	-1.16719	ENSMUSG00000038722	Bud31	-1.052	1.49937e-17	No	Bud31
Dennd2c	3.26	7.09	3.48	7.24	0	0	1.21	0	-3.844	1.69633e-05	Protein RRP5 homolog	Pdcd11	-1.05489	ENSMUSG00000025047	Pdcd11	-1.05	5.36365e-16	No	Pdcd11
Slc29a2	12.23	15.06	9.56	17.38	0	3.62	1.21	0	-3.826	1.19316e-11	AT-rich interactive domain-containing protein 1A	Arid1a	-1.98454	ENSMUSG00000007880	Arid1a	-1.041	3.74128e-11	No	Arid1a
Flrt3	57.87	67.34	70.4	53.57	5.28	1.81	2.43	9.05	-3.824	2.04417e-43	Glycolipid transfer protein	Gltp	-1.00633	ENSMUSG00000011884	Gltp	-1.03	1.92933e-06	No	Gltp
Gm23925	3.26	1.77	1.74	9.41	0.88	0	0	0	-3.808	0.00107476	Condensin-2 complex subunit D3	Ncapd3	-1.69545	ENSMUSG00000035024	Ncapd3	-1.028	4.78431e-07	No	Ncapd3
Gm20707	5.71	7.09	2.61	5.07	0	0	1.82	0	-3.783	2.6714e-05	Kinetochore-associated protein DSN1 homolog	Dsn1	-1.46141	ENSMUSG00000027635	Dsn1	-1.026	0.00430426	No	Dsn1
Rapgefl1	4.89	1.77	3.48	2.17	0	0.91	0	0	-3.754	0.000470351	H/ACA ribonucleoprotein complex non-core subunit NAF1	Naf1	-1.51938	ENSMUSG00000014907	Naf1	-1.023	5.47668e-14	No	Naf1
Kcnb1	4.89	4.43	4.35	2.9	0	0	0.61	0	-3.744	1.86651e-05	Dipeptidyl peptidase 2	Dpp7	-1.62469	ENSMUSG00000026958	Dpp7	-1.006	3.36745e-05	No	Dpp7
Cd74	5.71	14.18	12.17	12.31	0	0	1.82	0.75	-3.699	2.80783e-09	Translation initiation factor eIF-2B subunit alpha	Eif2b1	-1.07897	ENSMUSG00000029388	Eif2b1	-1.002	0.000179412	No	Eif2b1
Prodh	2.45	2.66	5.21	1.45	0	1.81	0	0	-3.646	0.00132368	Cleavage and polyadenylation specificity factor subunit 2	Cpsf2	-1.11984	ENSMUSG00000041781	Cpsf2	-0.989	9.9711e-22	No	Cpsf2
Ralgps2	14.67	18.61	17.38	16.65	0	1.81	1.82	0.75	-3.632	2.5573e-17	ATP-dependent RNA helicase DDX55	Ddx55	-1.76567	ENSMUSG00000029389	Ddx55	-0.989	5.53842e-05	No	Ddx55
Apoo	2.45	3.54	1.74	3.62	2.64	0	0	0	-3.629	0.000931816	Branched-chain-amino-acid aminotransferase, cytosolic;Branched-chain-amino-acid aminotransferase	Bcat1	4.09579	ENSMUSG00000030268	Bcat1	-0.987	8.22901e-22	No	Bcat1
Chd7	8.15	3.54	13.04	10.86	0.88	0.91	0	0.75	-3.625	1.90448e-07	Cystathionine gamma-lyase	Cth	7.10691	ENSMUSG00000028179	Cth	-0.986	0.00178054	No	Cth
Dtd2	4.89	12.4	7.82	10.14	0	0.91	0	2.26	-3.613	2.41179e-07	Active regulator of SIRT1	Rps19bp1	-1.09992	ENSMUSG00000051518	Rps19bp1	-0.985	2.11902e-24	No	Rps19bp1
Isyna1	42.38	41.64	39.11	49.95	2.64	4.53	3.03	3.02	-3.571	2.01096e-37	Small subunit processome component 20 homolog	Utp20	-1.33786	ENSMUSG00000004356	Utp20	-0.981	3.49693e-08	Isyna1	Utp20
Nrip3	8.15	3.54	4.35	2.17	0	0	2.43	0	-3.544	0.000467547	Oxysterol-binding protein-related protein 2	Osbpl2	1.03891	ENSMUSG00000039050	Osbpl2	-0.979	2.87874e-05	No	Osbpl2
Tagap1	12.23	7.97	11.3	11.58	0.88	0.91	1.21	0	-3.538	1.81052e-11	Suppressor of SWI4 1 homolog	Ppan	-1.29542	ENSMUSG00000004100	Ppan	-0.971	5.99546e-08	No	Ppan
Cass4	4.08	5.32	6.95	7.24	0	0.91	0	0.75	-3.529	7.53172e-07	Probable ATP-dependent RNA helicase DDX27	Ddx27	-1.01255	ENSMUSG00000017999	Ddx27	-0.963	1.46227e-17	No	Ddx27
Syngr1	25.27	17.72	23.47	33.3	2.64	0.91	2.43	1.51	-3.521	2.75217e-18	WD repeat-containing protein 46	Wdr46	-1.89468	ENSMUSG00000024312	Wdr46	-0.961	4.37611e-07	No	Wdr46
N4bp3	3.26	0.89	5.21	7.96	0	0	3.03	0	-3.514	0.00115489	Protein arginine N-methyltransferase 3	Prmt3	1.0313	ENSMUSG00000030505	Prmt3	-0.958	2.17998e-12	No	Prmt3
Ulbp1	20.38	41.64	41.72	24.62	2.64	3.62	3.03	0.75	-3.499	2.22668e-17	Amino acid transporter;Neutral amino acid transporter A	Slc1a4	1.16543	ENSMUSG00000020142	Slc1a4	-0.95	3.17618e-09	No	Slc1a4
Amigo1	2.45	2.66	4.35	2.9	0	0	0	0.75	-3.492	0.00040133	Male-enhanced antigen 1	Mea1	-1.36834	ENSMUSG00000002768	Mea1	-0.947	2.81264e-12	No	Mea1
Arhgap6	3.26	1.77	2.61	4.34	0	0	0	0.75	-3.485	0.000499049	Deoxynucleotidyltransferase terminal-interacting protein 2	Dnttip2	-1.95227	ENSMUSG00000039756	Dnttip2	-0.926	1.54845e-26	No	Dnttip2
Epb41	22.82	42.53	19.99	29.68	0.88	5.43	1.82	2.26	-3.425	1.19076e-15	Sister chromatid cohesion protein PDS5 homolog B	Pds5b	-1.03199	ENSMUSG00000034021	Pds5b	-0.924	2.83243e-22	No	Pds5b
Gls2	4.08	1.77	0	3.62	0	1.81	0	0	-3.391	0.00623177	Bone marrow stromal antigen 2	Bst2	-1.58952	ENSMUSG00000046718	Bst2	-0.914	1.65764e-14	No	Bst2
Des	2.45	1.77	5.21	2.17	0	0	0	1.51	-3.363	0.00206172	CWF19-like protein 1	Cwf19l1	-2.11627	ENSMUSG00000025200	Cwf19l1	-0.899	0.00904893	No	Cwf19l1
Ifi207	9.78	11.52	13.91	11.58	1.76	0.91	0.61	0.75	-3.352	1.07463e-11	Bromodomain adjacent to zinc finger domain protein 1A	Baz1a	-1.28643	ENSMUSG00000035021	Baz1a	-0.887	1.08099e-27	No	Baz1a
Renbp	123.89	141.77	109.5	128.87	8.79	9.05	11.53	15.08	-3.34	1.10908e-80	Kinesin-like protein KIF15	Kif15	-1.18853	ENSMUSG00000036768	Kif15	-0.885	2.97165e-20	Renbp	Kif15
Isg15	318.69	357.97	325.9	318.55	30.78	35.3	28.51	25.64	-3.338	2.97082e-197	CCAAT/enhancer-binding protein zeta	Cebpz	-1.08161	ENSMUSG00000024081	Cebpz	-0.86	7.38595e-26	Isg15	Cebpz
Adamtsl1	4.89	1.77	0.87	3.62	0	0	0	2.26	-3.328	0.00349521	Cyclin-dependent kinase inhibitor 1B	Cdkn1b	2.49621	ENSMUSG00000003031	Cdkn1b	-0.856	1.70116e-12	No	Cdkn1b
Cadm4	1.63	2.66	3.48	1.45	0	0.91	0	0	-3.328	0.00364066	Probable ATP-dependent RNA helicase DDX58	Ddx58	-1.01696	ENSMUSG00000040296	Ddx58	-0.845	3.77785e-10	No	Ddx58
Immp2l	11.41	5.32	6.95	15.2	0.88	2.72	0.61	0	-3.323	6.37267e-07	RNA exonuclease 4	Rexo4	-1.30993	ENSMUSG00000052406	Rexo4	-0.841	1.38267e-12	No	Rexo4
5730508B09Rik	1.63	7.97	1.74	1.45	0	1.81	0	0	-3.299	0.00877086	Cyclin-T1	Ccnt1	-1.0015	ENSMUSG00000011960	Ccnt1	-0.839	9.78269e-14	No	Ccnt1
Spaca9	4.08	1.77	3.48	0	0	1.81	0	0	-3.298	0.0100744	Glycylpeptide N-tetradecanoyltransferase;Glycylpeptide N-tetradecanoyltransferase 2	Nmt2	-1.00265	ENSMUSG00000026643	Nmt2	-0.839	5.52511e-10	No	Nmt2
Kcnj4	14.67	14.18	10.43	21.72	0	1.81	1.21	2.26	-3.296	2.12544e-11	Pre-mRNA-splicing factor 38B	Prpf38b	-1.10963	ENSMUSG00000027881	Prpf38b	-0.838	3.00173e-17	No	Prpf38b
Slc24a3	145.08	164.81	160.78	156.38	18.47	12.67	15.17	12.07	-3.288	6.70317e-114	Epsilon-sarcoglycan	Sgce	1.49689	ENSMUSG00000004631	Sgce	-0.835	0.0221001	No	Sgce
Elovl4	38.31	47.85	35.63	34.03	2.64	8.15	4.25	1.51	-3.276	1.2115e-25	Probable ATP-dependent RNA helicase DDX10	Ddx10	-1.34484	ENSMUSG00000053289	Ddx10	-0.832	1.83524e-17	No	Ddx10
Gm29202	1.63	6.2	0.87	2.17	1.76	0	0	0	-3.273	0.00861677	Antigen peptide transporter 1	Tap1	-2.19754	ENSMUSG00000037321	Tap1	-0.827	6.83055e-07	No	Tap1
2310034G01Rik	2.45	4.43	4.35	0	0	0	0	1.51	-3.267	0.00714078	U3 small nucleolar ribonucleoprotein protein MPP10	Mphosph10	-1.16206	ENSMUSG00000030521	Mphosph10	-0.821	7.82428e-16	No	Mphosph10
Crip2	90.47	120.5	83.43	102.08	16.71	5.43	4.25	15.08	-3.236	2.47055e-38	Borealin	Cdca8	-1.16571	ENSMUSG00000028873	Cdca8	-0.82	7.60873e-15	Crip2	Cdca8
Itgb7	4.89	1.77	3.48	0.72	0	0	0	2.26	-3.235	0.00596757	LYR motif-containing protein 4	Lyrm4	-1.69956	ENSMUSG00000046573	Lyrm4	-0.802	9.88314e-06	No	Lyrm4
Nrp2	61.13	50.51	71.26	62.99	7.03	7.24	6.07	3.77	-3.221	2.15579e-42	Probable ATP-dependent RNA helicase DDX56	Ddx56	-1.26053	ENSMUSG00000004393	Ddx56	-0.799	3.26957e-08	Nrp2	Ddx56
5430416N02Rik	87.21	87.72	99.07	88.33	3.52	12.67	9.71	8.3	-3.197	3.20008e-65	Pre-mRNA-splicing factor SLU7	Slu7	-1.80643	ENSMUSG00000020409	Slu7	-0.799	1.57527e-15	No	Slu7
Hmga1-rs1	4.89	1.77	10.43	3.62	0	0.91	0.61	0	-3.163	0.000404637	ETS-related transcription factor Elf-2	Elf2	-1.12988	ENSMUSG00000037174	Elf2	-0.793	3.43755e-05	No	Elf2
Inca1	0.82	4.43	5.21	2.9	0	0	1.21	0	-3.163	0.00214793		Ddx31	-2.40255	ENSMUSG00000026806	Ddx31	-0.784	0.00838054	No	Ddx31
Map4k2	3.26	5.32	4.35	9.41	0	1.81	0.61	0	-3.157	8.10997e-05	Serine-protein kinase ATM	Atm	-1.50039	ENSMUSG00000034218	Atm	-0.778	4.01297e-11	No	Atm
Rad51c	19.56	13.29	22.6	21.72	2.64	1.81	1.82	1.51	-3.146	4.66498e-15	E1A-binding protein p400	Ep400	-2.25233	ENSMUSG00000029505	Ep400	-0.775	4.73547e-07	No	Ep400
Nrtn	4.08	1.77	2.61	2.17	0	0	0.61	0	-3.143	0.00163911	2-deoxynucleoside 5-phosphate N-hydrolase 1	Dnph1	-5.40448	ENSMUSG00000040658	Dnph1	-0.766	1.19477e-05	No	Dnph1
Nupr1	347.22	349.11	331.99	361.99	41.33	46.17	30.33	31.67	-3.14	5.89393e-194	ATR-interacting protein	Atrip	2.40242	ENSMUSG00000025646	Atrip	-0.759	0.00794034	No	Atrip
Hist2h3b	4.89	6.2	1.74	0.72	0	0	1.82	0	-3.137	0.00565819	Structural maintenance of chromosomes protein 6	Smc6	-1.73691	ENSMUSG00000020608	Smc6	-0.748	1.58362e-38	No	Smc6
H2-K1	758.83	695.56	835.18	646.51	84.42	81.47	63.69	75.41	-3.128	2.87493e-201	Protein IWS1 homolog	Iws1	-1.06694	ENSMUSG00000024384	Iws1	-0.729	9.46609e-10	H2-K1	Iws1
Apol9b	83.14	88.61	58.23	95.57	9.67	11.77	6.07	8.3	-3.123	9.44639e-42	DNA mismatch repair protein Msh3	Msh3	-2.21745	ENSMUSG00000014850	Msh3	-0.722	0.000752327	No	Msh3
Irgm2	27.71	20.38	36.5	26.06	2.64	0.91	6.07	2.26	-3.123	2.99597e-16	Endothelin-converting enzyme 1	Ece1	-1.03622	ENSMUSG00000057530	Ece1	-0.716	9.30103e-06	No	Ece1
Rorb	17.12	34.56	20.86	20.27	0	0.91	4.25	3.02	-3.123	1.02802e-12	Protein AATF	Aatf	-1.51027	ENSMUSG00000018697	Aatf	-0.711	0.00669579	No	Aatf
Rad9a	79.88	65.57	65.18	75.29	5.28	9.05	5.46	10.56	-3.115	2.69845e-49	CDK-activating kinase assembly factor MAT1	Mnat1	-1.15255	ENSMUSG00000021103	Mnat1	-0.697	6.93567e-10	Rad9a	Mnat1
Uchl1	53.79	47.85	48.67	49.95	7.03	8.15	4.25	2.26	-3.098	2.77369e-39	Transcription initiation factor IIA subunit 1;Transcription initiation factor IIA alpha chain;Transcription initiation factor IIA beta chain	Gtf2a1	-1.33173	ENSMUSG00000020962	Gtf2a1	-0.691	7.72585e-05	Uchl1	Gtf2a1
Gadd45a	108.4	121.39	112.98	102.08	11.43	8.15	15.77	10.56	-3.086	7.10142e-74	Signal transducer and activator of transcription;Signal transducer and activator of transcription 1	Stat1	-1.18284	ENSMUSG00000026104	Stat1	-0.687	0.000169425	No	Stat1
Erc2	3.26	7.09	2.61	7.96	0	1.81	0.61	0	-3.077	0.000187815	7SK snRNA methylphosphate capping enzyme	Mepce	-1.68467	ENSMUSG00000029726	Mepce	-0.681	0.00142989	No	Mepce
Klf5	293.43	295.06	256.38	273.66	26.38	30.78	33.97	28.66	-3.075	1.33655e-160	Protein phosphatase 1 regulatory subunit 12C	Ppp1r12c	1.73302	ENSMUSG00000019254	Ppp1r12c	-0.666	0.000862763	No	Ppp1r12c
Me3	4.08	7.09	12.17	9.41	5.28	0	1.21	0	-3.072	1.4597e-05	Transformation/transcription domain-associated protein	Trrap	-2.66134	ENSMUSG00000045482	Trrap	-0.653	0.000238849	No	Trrap
Ppp1r13b	13.86	6.2	19.99	10.14	0.88	0	1.21	4.52	-3.068	5.58437e-07	Zinc finger CCHC domain-containing protein 8	Zcchc8	-1.25508	ENSMUSG00000029427	Zcchc8	-0.648	0.0034906	No	Zcchc8
Coro2a	1.63	2.66	2.61	5.07	0	0	1.21	0	-3.065	0.00251058	Cyclin-H	Ccnh	-1.0406	ENSMUSG00000021548	Ccnh	-0.647	0.000881548	No	Ccnh
Afap1l1	2.45	1.77	1.74	1.45	0	0.91	0	0	-3.054	0.0103969	Replication factor C subunit 2	Rfc2	-1.03125	ENSMUSG00000023104	Rfc2	-0.627	0.000386476	No	Rfc2
Apol9a	124.71	129.36	108.63	149.86	14.07	18.1	12.13	12.82	-3.052	5.61305e-67	Neurofibromin	Nf1	-1.02246	ENSMUSG00000020716	Nf1	-0.612	5.6205e-05	Apol9a	Nf1
Rybp	21.19	14.18	12.17	12.31	2.64	2.72	1.21	0	-3.052	1.13352e-10	Basigin	Bsg	-2.33081	ENSMUSG00000023175	Bsg	-0.603	6.41272e-11	No	Bsg
Adap1	2.45	3.54	3.48	0	0	0	0	1.51	-3.043	0.0122754	U3 small nucleolar RNA-associated protein 6 homolog	Utp6	-1.18837	ENSMUSG00000035575	Utp6	-0.596	0.000317461	No	Utp6
Trib3	246.97	257.84	278.1	249.05	26.38	21.73	37.61	28.66	-3.037	5.06755e-140	RNA-binding protein 25	Rbm25	-1.04983	ENSMUSG00000010608	Rbm25	-0.569	1.61661e-18	No	Rbm25
Ifit3	29.34	27.47	45.19	36.92	3.52	1.81	10.92	3.02	-3.029	4.46027e-17	Ceramide synthase 5	Cers5	-1.16341	ENSMUSG00000023021	Cers5	-0.566	1.08796e-07	No	Cers5
Hist1h4j	7.34	1.77	6.95	4.34	0	6.34	0.61	0	-3.029	0.000430081		Actn1	2.89846	ENSMUSG00000015143	Actn1	-0.557	2.7305e-15	No	Actn1
BC022687	41.57	23.04	35.63	47.06	3.52	8.15	4.25	2.26	-3.026	7.74277e-19		Nsmce4a	-1.17285	ENSMUSG00000040331	Nsmce4a	-0.546	3.03883e-05	No	Nsmce4a
Rpl11	1103.61	1093.39	1244.52	1112.76	122.23	110.44	129.21	160.63	-3.023	6.56228e-305	Beta-2-microglobulin	B2m	-1.46848	ENSMUSG00000060802	B2m	-0.536	9.14638e-29	No	B2m
N4bp2l1	11.41	9.75	12.17	7.96	0	0.91	3.03	0.75	-3.015	2.83408e-08	Piezo-type mechanosensitive ion channel component;Piezo-type mechanosensitive ion channel component 1	Piezo1	1.48702	ENSMUSG00000014444	Piezo1	-0.529	3.99903e-05	No	Piezo1
Cercam	11.41	15.95	14.77	17.38	1.76	2.72	0	2.26	-2.997	1.52428e-11	Interferon regulatory factor 2-binding protein-like	Irf2bpl	-1.22787	ENSMUSG00000034168	Irf2bpl	-0.523	0.000263246	No	Irf2bpl
Lhx9	3.26	6.2	2.61	0.72	0	0	3.03	0	-2.983	0.00882943	Mediator of RNA polymerase II transcription subunit 12	Med12	-1.83005	ENSMUSG00000079487	Med12	-0.519	0.0152859	No	Med12
Brinp1	9.78	4.43	6.95	5.79	0.88	0	2.43	0	-2.982	2.03508e-05	Origin recognition complex subunit 6	Orc6	-1.28148	ENSMUSG00000031697	Orc6	-0.486	0.000575802	No	Orc6
Gsto2	4.89	3.54	1.74	1.45	0	0	1.21	0	-2.977	0.00430303	Putative RNA-binding protein 15B	Rbm15b	4.43778	ENSMUSG00000074102	Rbm15b	-0.478	0.0387211	No	Rbm15b
Cdkl5	3.26	8.86	6.95	7.96	0	0.91	3.03	0	-2.975	5.63233e-05	Lysine-specific histone demethylase 1A	Kdm1a	-1.0262	ENSMUSG00000036940	Kdm1a	-0.462	0.00121529	No	Kdm1a
Zc3h8	47.27	41.64	39.98	49.95	6.16	3.62	8.49	2.26	-2.967	1.03465e-28	14-3-3 protein beta/alpha;14-3-3 protein beta/alpha, N-terminally processed	Ywhab	1.90856	ENSMUSG00000018326	Ywhab	-0.446	5.70713e-17	No	Ywhab
Zfp184	1.63	5.32	6.95	5.79	1.76	0	0.61	0	-2.967	0.000290182	Collagen alpha-1(VIII) chain;Vastatin	Col8a1	-1.88719	ENSMUSG00000068196	Col8a1	-0.437	7.34424e-07	No	Col8a1
Slc7a1	392.87	395.18	364.14	330.14	43.09	45.26	40.04	46	-2.964	6.73863e-171	Renin receptor	Atp6ap2	-1.50631	ENSMUSG00000031007	Atp6ap2	-0.403	1.32085e-05	Slc7a1	Atp6ap2
Cdkl2	29.34	25.7	26.07	26.06	6.16	4.53	0	2.26	-2.964	4.80741e-18	1-acyl-sn-glycerol-3-phosphate acyltransferase alpha	Agpat1	-1.45301	ENSMUSG00000034254	Agpat1	-0.398	0.0180573	No	Agpat1
Stc2	39.94	36.33	30.42	31.13	0.88	4.53	7.89	3.02	-2.961	9.69117e-21	Transferrin receptor protein 1	Tfrc	-1.60395	ENSMUSG00000022797	Tfrc	-0.391	0.00159344	No	Tfrc
Bach2	30.97	23.04	30.42	31.13	2.64	0.91	3.64	6.03	-2.958	1.73334e-20	Transcription factor AP-1	Jun	-1.55881	ENSMUSG00000052684	Jun	-0.386	0.0005691	No	Jun
Nmb	4.08	5.32	1.74	0.72	0	0	1.82	0	-2.955	0.0086989	Dual specificity protein kinase TTK	Ttk	-3.77289	ENSMUSG00000038379	Ttk	-0.374	0.00138531	No	Ttk
Spry1	3.26	2.66	0	5.79	0	0	3.03	0	-2.955	0.0124199	Histone-lysine N-methyltransferase EZH2	Ezh2	-1.43738	ENSMUSG00000029687	Ezh2	-0.367	0.000116229	No	Ezh2
Pard6b	2.45	1.77	2.61	4.34	0	0	2.43	0	-2.954	0.0048593		Sptan1	-1.40147	ENSMUSG00000057738	Sptan1	-0.339	0.00126345	No	Sptan1
Timp3	2325.41	2365.77	2211.8	2273.3	270.84	281.53	268.12	264.7	-2.952	0	Mediator of RNA polymerase II transcription subunit 19	Med19	-1.21346	ENSMUSG00000027080	Med19	-0.337	0.00245095	No	Med19
Slc5a6	8.15	5.32	1.74	1.45	0	0.91	0.61	0	-2.95	0.00221938	Ribonucleoside-diphosphate reductase subunit M2	Rrm2	-1.23509	ENSMUSG00000020649	Rrm2	-0.327	0.0463118	No	Rrm2
Veph1	4.08	9.75	12.17	2.9	0.88	0.91	1.21	0	-2.944	0.000125916	Core histone macro-H2A.1	H2afy	-1.26144	ENSMUSG00000015937	H2afy	-0.325	0.000788917	No	H2afy
Ccdc28a	17.12	20.38	9.56	12.31	0.88	3.62	1.82	0.75	-2.943	1.32385e-09	Transcription elongation factor 1 homolog	Elof1	-1.82125	ENSMUSG00000013822	Elof1	-0.299	0.016666	No	Elof1
Psph	169.54	124.05	160.78	122.35	14.07	19.01	18.2	16.59	-2.942	3.99429e-63	ATP-dependent RNA helicase DDX24	Ddx24	-1.26058	ENSMUSG00000041645	Ddx24	-0.283	5.05558e-05	No	Ddx24
Lck	9.78	7.09	5.21	7.24	2.64	0.91	0.61	0	-2.933	2.04103e-06	Septin-8	Sept8	1.23748	ENSMUSG00000018398	Sept8	-0.266	0.00505732	No	Sept8
Prdm9	8.97	8.86	2.61	8.69	0.88	2.72	0.61	0	-2.93	2.37073e-05	Phosphoenolpyruvate carboxykinase [GTP], mitochondrial	Pck2	1.65746	ENSMUSG00000040618	Pck2	-0.218	0.0203393	No	Pck2
Fhdc1	32.6	34.56	11.3	24.62	0.88	1.81	6.07	3.77	-2.917	3.19487e-11	NADH dehydrogenase [ubiquinone] 1 alpha subcomplex subunit 7	Ndufa7	1.02233	ENSMUSG00000041881	Ndufa7	-0.207	0.0187195	No	Ndufa7
Enpp5	6.52	14.18	7.82	7.24	1.76	0.91	0	1.51	-2.902	1.71892e-06	Serpin H1	Serpinh1	1.05735	ENSMUSG00000070436	Serpinh1	0.192	0.047376	No	Serpinh1
Napb	25.27	18.61	16.51	17.38	0	0	3.64	5.28	-2.873	1.57501e-11	BTB/POZ domain-containing adapter for CUL3-mediated RhoA degradation protein 3	Kctd10	-1.55108	ENSMUSG00000001098	Kctd10	0.259	0.0317141	No	Kctd10
Npas3	4.08	7.97	7.82	1.45	0	0	0.61	2.26	-2.864	0.00114497	NADH dehydrogenase [ubiquinone] 1 beta subcomplex subunit 2, mitochondrial	Ndufb2	2.37093	ENSMUSG00000002416	Ndufb2	0.291	0.00423244	No	Ndufb2
Cbx7	8.15	4.43	11.3	3.62	1.76	0	0	1.51	-2.862	9.35691e-05	Peptidyl-prolyl cis-trans isomerase C	Ppic	1.18707	ENSMUSG00000024538	Ppic	0.31	0.00101689	No	Ppic
Tstd1	0.82	2.66	1.74	1.45	1.76	0	0	0	-2.861	0.0237859	MAP kinase-activated protein kinase 2	Mapkapk2	1.41115	ENSMUSG00000016528	Mapkapk2	0.312	0.0262184	No	Mapkapk2
Zbtb46	4.08	2.66	3.48	0.72	0	0	1.82	0	-2.859	0.00894168	Interleukin-6 receptor subunit beta	Il6st	1.62027	ENSMUSG00000021756	Il6st	0.333	0.000165987	No	Il6st
Erdr1	155.68	138.22	178.16	209.95	21.98	19.01	17.59	25.64	-2.858	1.14328e-63	LIM domain transcription factor LMO4	Lmo4	1.43905	ENSMUSG00000028266	Lmo4	0.333	9.22529e-06	No	Lmo4
Gm45051	3.26	5.32	0	2.17	0	0	1.21	0	-2.848	0.0126757	Wiskott-Aldrich syndrome protein family member 2	Wasf2	1.13604	ENSMUSG00000028868	Wasf2	0.386	7.57938e-05	No	Wasf2
Chmp4c	8.97	6.2	7.82	9.41	1.76	0.91	1.21	0	-2.847	1.78e-07	Autophagy-related protein 101	Atg101	1.38815	ENSMUSG00000037204	Atg101	0.387	0.00241126	No	Atg101
Zbed5	13.86	15.06	24.33	12.31	1.76	2.72	1.82	1.51	-2.836	2.47035e-10	Oncostatin-M-specific receptor subunit beta	Osmr	1.16411	ENSMUSG00000022146	Osmr	0.398	0.0104733	No	Osmr
Lpl	145.9	145.31	144.27	137.56	22.86	10.86	19.41	18.85	-2.805	2.73881e-92	GRIP and coiled-coil domain-containing protein 2	Gcc2	-1.99892	ENSMUSG00000038039	Gcc2	0.401	0.000294041	No	Gcc2
Tmem39b	11.41	12.4	11.3	14.48	1.76	2.72	1.82	0	-2.797	2.50587e-10	Protein enabled homolog	Enah	1.07965	ENSMUSG00000022995	Enah	0.411	6.71503e-09	No	Enah
H2-Q4	13.86	17.72	23.47	11.58	1.76	1.81	3.64	0.75	-2.79	6.108e-10	CCAAT/enhancer-binding protein beta	Cebpb	1.43856	ENSMUSG00000056501	Cebpb	0.435	0.000438828	No	Cebpb
F830016B08Rik	2.45	1.77	1.74	1.45	0	0	0	0.75	-2.783	0.0139237	6-phosphogluconolactonase	Pgls	1.05531	ENSMUSG00000031807	Pgls	0.454	3.36475e-06	No	Pgls
Zfp566	16.3	8.86	7.82	15.2	0.88	2.72	1.21	1.51	-2.782	4.59788e-08	UPF0769 protein C21orf59 homolog	1110004E09Rik	-1.08662	ENSMUSG00000022972	1110004E09Rik	0.464	0.0211528	No	1110004E09Rik
Ifit1	196.43	162.15	150.35	181	19.35	23.54	25.48	22.62	-2.777	1.03284e-83	Unconventional prefoldin RPB5 interactor	Uri1	1.74968	ENSMUSG00000030421	Uri1	0.465	5.12231e-06	Ifit1	Uri1
Zfp947	4.08	7.09	6.08	2.9	0.88	0.91	0	0.75	-2.777	0.000158017	Lamin-B1	Lmnb1	-2.70174	ENSMUSG00000024590	Lmnb1	0.476	0.000468428	No	Lmnb1
Gbp9	19.56	18.61	21.73	17.38	3.52	2.72	1.21	3.02	-2.773	2.31371e-15	Mortality factor 4-like protein 1	Morf4l1	-1.55656	ENSMUSG00000062270	Morf4l1	0.485	7.88222e-05	Gbp9	Morf4l1
Igfbp6	14.67	16.84	16.51	20.27	4.4	1.81	2.43	0.75	-2.766	1.33717e-12	DET1- and DDB1-associated protein 1	Dda1	1.80625	ENSMUSG00000074247	Dda1	0.525	0.000390964	No	Dda1
H2-D1	869.68	822.26	911.66	806.51	126.63	112.25	109.19	119.15	-2.741	3.13908e-298	Lysyl oxidase homolog 3	Loxl3	-2.0655	ENSMUSG00000000693	Loxl3	0.527	0.0129661	H2-D1	Loxl3
Slc9a3r2	17.93	30.13	20.86	23.17	3.52	0.91	3.03	4.52	-2.74	4.4467e-14	Guanylate kinase	Guk1	1.08965	ENSMUSG00000020444	Guk1	0.554	0.000183524	No	Guk1
Dkk2	4.08	1.77	1.74	2.17	0	0	2.43	0	-2.739	0.0122915	G patch domain and KOW motifs-containing protein	Gpkow	-1.16039	ENSMUSG00000031148	Gpkow	0.567	0.0359346	No	Gpkow
Mgme1	35.86	24.81	14.77	20.27	2.64	1.81	3.03	4.52	-2.737	1.67386e-11	Pterin-4-alpha-carbinolamine dehydratase 2	Pcbd2	3.05419	ENSMUSG00000021496	Pcbd2	0.581	0.00909085	No	Pcbd2
Enkur	4.08	1.77	0.87	2.9	0	0	1.82	0	-2.736	0.0129483	Nucleotide exchange factor SIL1	Sil1	1.09191	ENSMUSG00000024357	Sil1	0.598	0.0145995	No	Sil1
Taf4b	33.42	21.27	33.89	24.62	5.28	3.62	1.21	5.28	-2.733	2.26298e-15	Mitochondrial chaperone BCS1	Bcs1l	1.06914	ENSMUSG00000026172	Bcs1l	0.61	0.0273915	No	Bcs1l
Dtnb	11.41	9.75	8.69	4.34	0	2.72	0.61	1.51	-2.703	9.45871e-06	Flavin reductase (NADPH)	Blvrb	1.11241	ENSMUSG00000040466	Blvrb	0.623	0.00514965	No	Blvrb
AC124577.3	13.86	9.75	6.08	5.79	0.88	0.91	0.61	2.26	-2.698	7.45299e-06	Rho GTPase-activating protein 35	Arhgap35	2.13422	ENSMUSG00000058230	Arhgap35	0.627	0.00229434	No	Arhgap35
Apol10b	2.45	15.06	10.43	7.24	2.64	0.91	0.61	0.75	-2.689	0.00011163	Integral membrane protein 2B;BRI2, membrane form;BRI2 intracellular domain;BRI2C, soluble form;Bri23 peptide	Itm2b	1.10828	ENSMUSG00000022108	Itm2b	0.632	1.24954e-12	No	Itm2b
Pacs2	38.31	44.3	44.32	36.2	11.43	2.72	4.25	7.54	-2.676	3.27869e-23	FERM, RhoGEF and pleckstrin domain-containing protein 1	Farp1	1.14449	ENSMUSG00000025555	Farp1	0.634	7.9324e-05	No	Farp1
Mamdc2	1.63	0	1.74	2.17	0	2.72	0	0	-2.673	0.0442848	Leucine-rich repeat serine/threonine-protein kinase 2	Lrrk2	-1.12209	ENSMUSG00000036273	Lrrk2	0.655	0.0266182	No	Lrrk2
March9	6.52	4.43	13.91	8.69	0	0.91	2.43	0.75	-2.671	3.40082e-05	Serum paraoxonase/lactonase 3	Pon3	1.26364	ENSMUSG00000029759	Pon3	0.658	0.00805688	No	Pon3
Cmtr1	79.06	75.31	77.35	80.36	14.07	7.24	20.62	6.03	-2.669	3.70579e-38		Pkp2	5.05217	ENSMUSG00000041957	Pkp2	0.664	0.0388028	Cmtr1	Pkp2
Ccl7	153.23	161.26	156.43	125.25	16.71	23.54	21.23	24.13	-2.665	2.41273e-71	Sjoegren syndrome nuclear autoantigen 1 homolog	Ssna1	1.05873	ENSMUSG00000026966	Ssna1	0.666	5.51633e-05	No	Ssna1
Zc3h12c	20.38	7.97	4.35	7.24	0.88	3.62	1.21	0	-2.657	0.000186383	Urokinase plasminogen activator surface receptor	Plaur	1.18146	ENSMUSG00000046223	Plaur	0.67	0.0153893	No	Plaur
Zkscan14	6.52	1.77	10.43	5.07	0	1.81	0	1.51	-2.655	0.000705347	Serine palmitoyltransferase 1	Sptlc1	-1.32551	ENSMUSG00000021468	Sptlc1	0.67	0.000155952	No	Sptlc1
Cox6a2	53.79	34.56	39.11	41.27	11.43	5.43	4.25	6.03	-2.652	7.63678e-21	Probable aminopeptidase NPEPL1	Npepl1	3.0507	ENSMUSG00000039263	Npepl1	0.716	0.00729298	No	Npepl1
Zfp296	2.45	1.77	3.48	1.45	0	0	1.21	0	-2.649	0.0129483	Atlastin-3	Atl3	1.01059	ENSMUSG00000024759	Atl3	0.738	7.77083e-06	No	Atl3
Fam105a	0.82	2.66	4.35	1.45	0	0	1.21	0	-2.642	0.01775	Transforming growth factor beta receptor type 3	Tgfbr3	2.89997	ENSMUSG00000029287	Tgfbr3	0.748	6.69712e-05	No	Tgfbr3
Batf3	8.97	7.09	3.48	3.62	0.88	0	0.61	1.51	-2.637	0.000197249	Receptor expression-enhancing protein 4	Reep4	-1.33776	ENSMUSG00000033589	Reep4	0.753	0.000160565	No	Reep4
Slc7a3	57.06	55.82	55.62	55.75	14.07	5.43	7.28	9.05	-2.611	3.3562e-36		Mvp	1.10077	ENSMUSG00000030681	Mvp	0.758	0.000263681	No	Mvp
Hebp1	21.19	23.04	21.73	18.1	0.88	3.62	3.64	3.77	-2.602	4.55787e-15	Metalloproteinase inhibitor 2	Timp2	1.34274	ENSMUSG00000017466	Timp2	0.77	4.5803e-45	Hebp1	Timp2
Rpp40	61.13	62.91	44.32	75.29	4.4	14.48	11.53	6.79	-2.597	1.04796e-23	Protein prune homolog 2	Prune2	2.80747	ENSMUSG00000039126	Prune2	0.777	8.40885e-05	No	Prune2
AC163040.2	2.45	0.89	1.74	1.45	0	0	0	1.51	-2.597	0.03408	CD109 antigen	Cd109	-1.05948	ENSMUSG00000046186	Cd109	0.78	0.00103258	No	Cd109
Larp1b	85.58	96.58	82.56	71.67	9.67	11.77	11.53	23.38	-2.593	2.19345e-36	ATP-dependent DNA helicase Q1	Recql	-1.25124	ENSMUSG00000030243	Recql	0.781	0.00242723	No	Recql
Gm37233	0.82	1.77	1.74	4.34	0	0	1.21	0	-2.589	0.0218658	Clathrin light chain B	Cltb	1.31377	ENSMUSG00000047547	Cltb	0.784	9.8183e-07	No	Cltb
Zfp119b	0	1.77	4.35	2.9	0	0	1.82	0	-2.589	0.0305428	Dynein light chain Tctex-type 3	Dynlt3	-2.6077	ENSMUSG00000031176	Dynlt3	0.795	2.12927e-19	No	Dynlt3
Slc16a6	17.12	13.29	23.47	10.14	4.4	3.62	0.61	1.51	-2.586	5.34856e-08	Cathepsin L1;Cathepsin L1 heavy chain;Cathepsin L1 light chain	Ctsl	1.05452	ENSMUSG00000021477	Ctsl	0.823	1.25698e-27	No	Ctsl
Frmd3	10.6	7.09	12.17	1.45	0.88	1.81	1.21	0.75	-2.583	0.00025201	Pleckstrin homology domain-containing family O member 2	Plekho2	1.46274	ENSMUSG00000050721	Plekho2	0.825	8.69381e-05	No	Plekho2
Cdh2	68.47	62.02	70.4	65.16	12.31	11.77	7.28	10.56	-2.569	5.43081e-43		Pdia6	6.1739	ENSMUSG00000020571	Pdia6	0.842	2.05741e-28	Cdh2	Pdia6
Hist1h3a	8.97	4.43	2.61	5.79	0.88	0.91	0	1.51	-2.562	0.000373973	Disintegrin and metalloproteinase domain-containing protein 9	Adam9	1.36718	ENSMUSG00000031555	Adam9	0.845	0.00290855	No	Adam9
Oasl2	44.83	44.3	40.85	49.23	3.52	10.86	4.25	10.56	-2.56	5.40278e-25	Peptidyl-prolyl cis-trans isomerase FKBP11	Fkbp11	1.44684	ENSMUSG00000003355	Fkbp11	0.85	2.10641e-08	Oasl2	Fkbp11
AI606181	5.71	12.4	5.21	7.96	0.88	3.62	0.61	0.75	-2.56	5.5117e-05	Nicotinamide N-methyltransferase	Nnmt	1.98417	ENSMUSG00000032271	Nnmt	0.851	0.000176246	No	Nnmt
A930015D03Rik	12.23	7.09	10.43	11.58	0.88	2.72	2.43	0	-2.546	1.68438e-07	1,4-alpha-glucan-branching enzyme	Gbe1	-1.39682	ENSMUSG00000022707	Gbe1	0.857	0.00492066	No	Gbe1
Eif2b3	141.82	137.34	121.67	161.45	20.22	24.44	19.41	24.89	-2.539	7.67938e-63	Arpin	Arpin	1.59515	ENSMUSG00000039043	Arpin	0.875	0.00859711	No	Arpin
Tmem144	10.6	6.2	10.43	8.69	2.64	0	1.21	1.51	-2.534	5.59476e-07	EGF domain-specific O-linked N-acetylglucosamine transferase	Eogt	1.46863	ENSMUSG00000035245	Eogt	0.883	0.000288894	No	Eogt
Cd274	7.34	2.66	7.82	15.2	0.88	0.91	1.21	1.51	-2.517	0.000220261	Transmembrane emp24 domain-containing protein 3	Tmed3	1.13988	ENSMUSG00000032353	Tmed3	0.894	1.04821e-11	No	Tmed3
Acot2	489.04	492.65	435.41	555.29	81.78	81.47	84.32	48.26	-2.514	2.91509e-112	Ras-related protein R-Ras	Rras	1.18994	ENSMUSG00000038387	Rras	0.895	1.62956e-11	No	Rras
2700046G09Rik	0.82	2.66	3.48	1.45	0	0	1.21	0	-2.514	0.0241975	Carnitine O-palmitoyltransferase 1, liver isoform	Cpt1a	1.67492	ENSMUSG00000024900	Cpt1a	0.896	2.58459e-05	No	Cpt1a
Gm11273	30.97	32.78	38.24	29.68	4.4	7.24	4.85	4.52	-2.511	8.34687e-21	Pre-B-cell leukemia transcription factor-interacting protein 1	Pbxip1	2.77671	ENSMUSG00000042613	Pbxip1	0.898	3.42387e-18	No	Pbxip1
Flrt1	8.97	11.52	6.95	7.96	0.88	2.72	0.61	1.51	-2.501	8.91979e-07	Methylglutaconyl-CoA hydratase, mitochondrial	Auh	1.25364	ENSMUSG00000021460	Auh	0.903	0.000458604	No	Auh
Zfp956	4.89	9.75	6.95	13.03	0	1.81	1.82	1.51	-2.5	1.84303e-05	Amyloid-like protein 2	Aplp2	1.6598	ENSMUSG00000031996	Aplp2	0.906	6.05559e-33	No	Aplp2
Ifit3b	8.15	11.52	10.43	10.14	2.64	0.91	2.43	0	-2.485	1.41372e-07	Guanine nucleotide-binding protein G(I)/G(S)/G(O) subunit gamma-12	Gng12	1.17403	ENSMUSG00000036402	Gng12	0.909	7.66352e-25	No	Gng12
Tor3a	91.29	79.75	77.35	70.95	12.31	20.82	12.74	9.8	-2.482	4.54978e-38	GTP:AMP phosphotransferase AK3, mitochondrial	Ak3	1.08578	ENSMUSG00000024782	Ak3	0.911	4.53173e-11	Tor3a	Ak3
Zfp598	42.38	84.18	62.57	55.02	7.03	9.96	10.31	10.56	-2.473	1.50021e-21	Chondroitin sulfate proteoglycan 4	Cspg4	2.98428	ENSMUSG00000032911	Cspg4	0.915	0.00358759	No	Cspg4
Nudc	63.58	64.68	48.67	58.64	10.55	14.48	8.49	6.79	-2.471	1.0893e-29	Oligoribonuclease, mitochondrial	Rexo2	1.08843	ENSMUSG00000032026	Rexo2	0.918	6.34244e-37	No	Rexo2
Wbscr17	8.15	13.29	7.82	7.96	1.76	0	4.25	0.75	-2.469	1.26826e-05	TRIO and F-actin-binding protein	Triobp	1.06311	ENSMUSG00000033088	Triobp	0.92	3.32134e-05	No	Triobp
Usp18	100.25	99.24	87.78	94.84	13.19	15.39	16.38	17.34	-2.468	7.11171e-57	ATP-binding cassette sub-family G member 2	Abcg2	1.91952	ENSMUSG00000029802	Abcg2	0.925	6.29589e-08	Usp18	Abcg2
Kntc1	39.12	38.1	25.2	32.58	3.52	3.62	7.28	6.79	-2.46	1.52689e-17		Cald1	5.07598	ENSMUSG00000029761	Cald1	0.936	8.76901e-65	No	Cald1
Gm13205	12.23	3.54	9.56	4.34	0.88	1.81	1.21	0.75	-2.449	0.000248333	Golgi apparatus protein 1	Glg1	1.38687	ENSMUSG00000003316	Glg1	0.936	5.18175e-51	No	Glg1
Znrf3	7.34	8.86	11.3	10.86	1.76	1.81	1.21	1.51	-2.448	2.22668e-07	Myeloid-associated differentiation marker	Myadm	1.33465	ENSMUSG00000068566	Myadm	0.946	2.0905e-36	No	Myadm
Dhrs9	17.93	12.4	13.91	10.86	1.76	4.53	2.43	0.75	-2.447	1.45799e-08	BAG family molecular chaperone regulator 2	Bag2	1.19286	ENSMUSG00000042215	Bag2	0.957	0.0170682	No	Bag2
Cpsf4	50.53	37.21	59.97	42.71	8.79	7.24	5.46	10.56	-2.443	2.82908e-21		Ahnak2	1.33923	ENSMUSG00000072812	Ahnak2	0.974	4.74179e-25	No	Ahnak2
Gphn	32.6	32.78	25.2	29.68	3.52	4.53	6.07	5.28	-2.443	7.77367e-19	COX assembly mitochondrial protein 2 homolog	Cmc2	1.07279	ENSMUSG00000014633	Cmc2	0.98	1.00699e-09	Gphn	Cmc2
Igtp	62.76	43.42	48.67	62.99	8.79	9.96	5.46	12.82	-2.441	1.62439e-23	RUS1 family protein C16orf58 homolog	BC017158	3.01065	ENSMUSG00000030780	BC017158	0.996	0.00172721	Igtp	BC017158
Strbp	224.96	182.53	165.12	206.33	36.05	31.68	37.61	20.36	-2.44	7.14046e-61	Long-chain-fatty-acid--CoA ligase 1	Acsl1	1.40366	ENSMUSG00000018796	Acsl1	0.997	1.90666e-08	No	Acsl1
Xaf1	63.58	77.97	43.45	53.57	12.31	9.05	10.31	7.54	-2.432	2.08117e-22	Rho guanine nucleotide exchange factor 40	Arhgef40	1.32482	ENSMUSG00000004562	Arhgef40	0.997	9.42761e-05	Xaf1	Arhgef40
Chac1	171.98	165.69	146.87	153.48	29.02	12.67	27.9	30.16	-2.43	5.07503e-70	Protein PRRC1	Prrc1	1.32783	ENSMUSG00000024594	Prrc1	1.003	3.82043e-05	No	Prrc1
Dusp9	13.04	11.52	15.64	5.79	0	0.91	2.43	5.28	-2.43	1.36561e-05	Transmembrane protein 59	Tmem59	3.56784	ENSMUSG00000028618	Tmem59	1.03	2.90711e-23	Dusp9	Tmem59
Sp110	3.26	7.97	3.48	0.72	0	3.62	0.61	0	-2.429	0.0161814	Amine oxidase [flavin-containing] A	Maoa	1.15024	ENSMUSG00000025037	Maoa	1.037	5.30354e-12	No	Maoa
Gbp3	36.68	40.76	37.37	44.16	7.03	3.62	7.28	8.3	-2.426	4.39718e-24	Forkhead box protein P1	Foxp1	1.87972	ENSMUSG00000030067	Foxp1	1.043	3.11578e-51	No	Foxp1
U90926	123.89	143.54	148.61	132.49	28.14	23.54	24.26	12.82	-2.425	1.06205e-57	Lipoma-preferred partner homolog	Lpp	1.28701	ENSMUSG00000033306	Lpp	1.051	6.9012e-53	No	Lpp
Erlin1	53.79	54.05	58.23	52.13	8.79	8.15	9.1	10.56	-2.423	5.48126e-35	Matrix metalloproteinase-14	Mmp14	1.54109	ENSMUSG00000000957	Mmp14	1.052	2.5369e-38	No	Mmp14
Helq	17.12	10.63	14.77	8.69	1.76	2.72	2.43	1.51	-2.412	1.11872e-07	Ganglioside GM2 activator	Gm2a	1.38522	ENSMUSG00000000594	Gm2a	1.055	2.07922e-05	No	Gm2a
Gbp7	105.14	99.24	105.16	106.43	19.35	9.05	16.38	24.89	-2.407	5.89082e-52	Isovaleryl-CoA dehydrogenase, mitochondrial	Ivd	-2.01258	ENSMUSG00000027332	Ivd	1.059	0.00226763	Gbp7	Ivd
Mipol1	10.6	6.2	18.25	16.65	1.76	0.91	4.85	1.51	-2.406	5.95572e-06	Isochorismatase domain-containing protein 2A, mitochondrial	Isoc2a	1.81463	ENSMUSG00000086784	Isoc2a	1.063	4.73078e-05	No	Isoc2a
Atp8a1	4.89	1.77	6.95	5.79	0	1.81	0.61	0.75	-2.404	0.000804956	SEC14 domain and spectrin repeat-containing protein 1	Sestd1	2.6335	ENSMUSG00000042272	Sestd1	1.065	4.47424e-13	No	Sestd1
Chchd10	8.97	8.86	11.3	3.62	1.76	0	2.43	0.75	-2.395	8.7731e-05	Adipocyte enhancer-binding protein 1	Aebp1	2.24551	ENSMUSG00000020473	Aebp1	1.079	5.96073e-38	No	Aebp1
2310033P09Rik	90.47	97.47	97.34	97.01	9.67	16.29	18.81	18.85	-2.392	6.49286e-53	Vacuolar protein sorting-associated protein 4A	Vps4a	1.20655	ENSMUSG00000031913	Vps4a	1.089	1.27287e-06	No	Vps4a
E130308A19Rik	12.23	15.95	12.17	10.14	2.64	1.81	2.43	1.51	-2.386	1.47727e-08		Rab4b	1.52259	ENSMUSG00000053291	Rab4b	1.094	0.00545351	No	Rab4b
Gnaz	0.82	2.66	3.48	10.14	0.88	2.72	0	0	-2.377	0.0216035	Cysteine and glycine-rich protein 1	Csrp1	1.39868	ENSMUSG00000026421	Csrp1	1.107	3.70495e-36	No	Csrp1
Herc6	101.88	73.54	67.79	90.5	21.1	13.58	15.17	10.56	-2.376	1.14101e-29	5(3)-deoxyribonucleotidase, cytosolic type	Nt5c	1.28931	ENSMUSG00000020736	Nt5c	1.114	1.41911e-09	No	Nt5c
Ripor2	30.97	38.99	39.98	22.44	5.28	5.43	4.85	7.54	-2.376	1.08621e-14	FYVE and coiled-coil domain-containing protein 1	Fyco1	4.63223	ENSMUSG00000025241	Fyco1	1.128	8.82112e-08	No	Fyco1
Adat2	44.83	38.1	45.19	34.75	6.16	5.43	6.67	9.8	-2.372	2.99925e-22	Protein IMPACT	Impact	1.61	ENSMUSG00000024423	Impact	1.133	5.70402e-14	Adat2	Impact
Adrb3	2.45	0.89	2.61	1.45	0	0	1.21	0	-2.37	0.0354861	Succinyl-CoA:3-ketoacid coenzyme A transferase 1, mitochondrial;Succinyl-CoA:3-ketoacid-coenzyme A transferase	Oxct1	1.10711	ENSMUSG00000022186	Oxct1	1.136	3.76457e-55	No	Oxct1
Kcnab1	16.3	7.97	15.64	12.31	1.76	7.24	1.21	2.26	-2.363	6.48782e-07	GDH/6PGL endoplasmic bifunctional protein;Glucose 1-dehydrogenase;6-phosphogluconolactonase	H6pd	2.26813	ENSMUSG00000028980	H6pd	1.138	0.00540507	No	H6pd
Txnip	116.56	102.78	110.37	102.08	20.22	18.1	13.95	24.89	-2.359	6.8759e-53	Cytosolic phospholipase A2;Phospholipase A2;Lysophospholipase	Pla2g4a	1.25464	ENSMUSG00000056220	Pla2g4a	1.142	3.54662e-16	No	Pla2g4a
Slc16a3	170.35	183.41	159.91	168.69	29.9	28.97	41.25	21.87	-2.358	1.70012e-67	Tyrosine-protein kinase receptor;Insulin-like growth factor 1 receptor;Insulin-like growth factor 1 receptor alpha chain;Insulin-like growth factor 1 receptor beta chain	Igf1r	1.32613	ENSMUSG00000005533	Igf1r	1.144	8.30022e-36	No	Igf1r
Dus4l	35.86	24.81	27.81	26.79	2.64	5.43	4.25	8.3	-2.357	5.0166e-15	Cysteine and glycine-rich protein 2	Csrp2	1.15738	ENSMUSG00000020186	Csrp2	1.147	1.31908e-22	No	Csrp2
Gch1	22.82	15.06	20.86	15.93	1.76	4.53	4.25	2.26	-2.355	7.33207e-11	Enoyl-CoA hydratase, mitochondrial	Echs1	1.39146	ENSMUSG00000025465	Echs1	1.156	2.58459e-05	No	Echs1
Uhrf1bp1	42.38	47.85	34.76	39.82	8.79	8.15	6.67	6.03	-2.352	2.00597e-22	Vasodilator-stimulated phosphoprotein	Vasp	1.29461	ENSMUSG00000030403	Vasp	1.176	5.50793e-21	No	Vasp
Fam84b	21.19	14.18	12.17	18.1	3.52	2.72	1.82	3.77	-2.352	1.57942e-09	AMP deaminase 3	Ampd3	1.89932	ENSMUSG00000005686	Ampd3	1.177	0.0196526	No	Ampd3
Zfp867	5.71	5.32	4.35	3.62	0	0.91	1.21	0.75	-2.352	0.000416516	Receptor-interacting serine/threonine-protein kinase 2	Ripk2	1.3867	ENSMUSG00000041135	Ripk2	1.19	1.07347e-05	No	Ripk2
Slc13a5	3.26	2.66	0	1.45	0	0	1.21	0	-2.348	0.0463524	Collagen alpha-1(V) chain	Col5a1	2.11842	ENSMUSG00000026837	Col5a1	1.204	7.3894e-42	No	Col5a1
Retreg1	37.49	38.1	37.37	41.99	8.79	5.43	9.1	3.02	-2.345	7.32711e-22	Sorting nexin;Sorting nexin-18	Snx18	1.5716	ENSMUSG00000042364	Snx18	1.205	6.28586e-31	No	Snx18
Ptgs2os2	9.78	14.18	7.82	10.14	0	0.91	3.64	2.26	-2.341	2.46693e-06	Protein S100-A10	S100a10	1.24937	ENSMUSG00000041959	S100a10	1.207	9.2949e-45	No	S100a10
Raver1	1.63	4.43	3.48	2.9	0	1.81	0.61	0	-2.332	0.00686361	P2X purinoceptor;P2X purinoceptor 4	P2rx4	2.90861	ENSMUSG00000029470	P2rx4	1.214	3.44887e-08	No	P2rx4
Ddit3	502.09	458.98	422.37	463.35	89.69	86.9	86.75	72.4	-2.331	1.28321e-152	Glypican-1;Secreted glypican-1	Gpc1	1.3522	ENSMUSG00000034220	Gpc1	1.218	1.17343e-28	No	Gpc1
Lyz2	4.89	1.77	4.35	5.79	0.88	0	2.43	0	-2.328	0.00328653	Eyes absent homolog 4;Eyes absent homolog	Eya4	2.29073	ENSMUSG00000010461	Eya4	1.228	6.24221e-12	No	Eya4
Car7	4.89	3.54	1.74	2.17	0	2.72	0.61	0	-2.325	0.00983308	Fibrillin-1	Fbn1	1.06697	ENSMUSG00000027204	Fbn1	1.234	2.5189e-28	No	Fbn1
Ttc27	44.83	40.76	25.2	39.09	10.55	9.05	4.85	4.52	-2.315	2.0811e-15	Delta(3,5)-Delta(2,4)-dienoyl-CoA isomerase, mitochondrial	Ech1	2.2595	ENSMUSG00000053898	Ech1	1.235	4.08972e-13	No	Ech1
Mcm8	47.27	42.53	28.68	29.68	2.64	9.05	9.71	4.52	-2.312	8.68202e-14	Kinesin-like protein KIF23	Kif23	-2.80639	ENSMUSG00000032254	Kif23	1.236	1.26402e-16	No	Kif23
Itga7	12.23	3.54	1.74	9.41	0	2.72	0	2.26	-2.302	0.00554297	C-X-C motif chemokine 5;GCP-2(1-78);GCP-2(9-78)	Cxcl5	1.57943	ENSMUSG00000029371	Cxcl5	1.239	1.44193e-95	No	Cxcl5
Nop14	550.18	571.51	526.66	545.88	107.28	113.15	84.32	100.3	-2.298	2.34837e-171	Aldehyde dehydrogenase, mitochondrial	Aldh2	1.45612	ENSMUSG00000029455	Aldh2	1.242	2.07851e-34	Nop14	Aldh2
Ccl5	116.56	141.77	126.89	139	38.69	10.86	22.44	27.15	-2.297	3.63137e-42	CD81 antigen	Cd81	2.3019	ENSMUSG00000037706	Cd81	1.246	1.49044e-53	No	Cd81
Parp12	43.2	52.28	47.8	42.71	3.52	7.24	13.35	9.05	-2.292	5.35645e-21	Solute carrier family 12 member 2	Slc12a2	1.76649	ENSMUSG00000024597	Slc12a2	1.247	1.02627e-24	No	Slc12a2
Recql4	51.35	41.64	34.76	34.75	6.16	7.24	8.49	7.54	-2.292	6.12792e-19	Prostaglandin reductase 1	Ptgr1	1.01624	ENSMUSG00000028378	Ptgr1	1.268	1.10457e-08	No	Ptgr1
Mx1	2.45	1.77	2.61	2.9	0	0	0.61	0.75	-2.291	0.0112855	Fibronectin;Anastellin	Fn1	2.32503	ENSMUSG00000026193	Fn1	1.273	8.88914e-85	No	Fn1
Sh3bp2	5.71	3.54	4.35	4.34	0.88	0	0.61	1.51	-2.289	0.000694896	Caspase-3;Caspase-3 subunit p17;Caspase-3 subunit p12	Casp3	1.14938	ENSMUSG00000031628	Casp3	1.277	4.78129e-22	No	Casp3
Igsf9b	5.71	3.54	6.95	9.41	0	1.81	1.82	0.75	-2.285	0.000223489	Vacuolar protein sorting-associated protein 37C	Vps37c	1.41646	ENSMUSG00000048832	Vps37c	1.283	0.0246852	No	Vps37c
Acp6	28.53	26.58	26.94	33.3	7.91	4.53	4.85	4.52	-2.284	9.74172e-17	Integral membrane protein 2C;CT-BRI3	Itm2c	1.54321	ENSMUSG00000026223	Itm2c	1.29	6.64498e-19	Acp6	Itm2c
Gem	4.89	9.75	2.61	7.96	0	4.53	1.21	0.75	-2.284	0.00151579	Platelet-derived growth factor receptor beta	Pdgfrb	1.78346	ENSMUSG00000024620	Pdgfrb	1.297	9.78675e-06	No	Pdgfrb
Hist1h3c	13.04	14.18	7.82	15.2	3.52	2.72	1.82	1.51	-2.28	1.75969e-07		Abcc4	2.36677	ENSMUSG00000032849	Abcc4	1.316	2.38248e-06	No	Abcc4
Snx8	203.77	219.74	179.9	209.23	41.33	42.55	33.36	38.46	-2.27	9.20382e-81	Ornithine aminotransferase, mitochondrial	Oat	1.26468	ENSMUSG00000030934	Oat	1.342	1.4297e-27	Snx8	Oat
Ccl2	264.08	255.18	208.58	219.37	42.21	32.59	50.96	49.02	-2.265	8.70194e-73	Bifunctional 3-phosphoadenosine 5-phosphosulfate synthase 2;Sulfate adenylyltransferase;Adenylyl-sulfate kinase	Papss2	2.93545	ENSMUSG00000024899	Papss2	1.353	0.000946098	No	Papss2
Cry1	48.09	46.96	32.16	27.51	7.91	8.15	9.1	3.77	-2.261	5.37451e-14	Kinesin-like protein;Kinesin-like protein KIF21A	Kif21a	2.10465	ENSMUSG00000022629	Kif21a	1.357	4.60256e-16	No	Kif21a
Abcb6	8.15	8.86	4.35	10.14	0	0	3.64	2.26	-2.257	0.000177583	Inhibitor of nuclear factor kappa-B kinase-interacting protein	Ikbip	1.29335	ENSMUSG00000019975	Ikbip	1.366	4.43924e-33	No	Ikbip
Otub2	25.27	39.87	32.16	32.58	8.79	4.53	7.28	3.77	-2.255	4.06565e-15	N(4)-(beta-N-acetylglucosaminyl)-L-asparaginase;Glycosylasparaginase alpha chain;Glycosylasparaginase beta chain	Aga	1.17999	ENSMUSG00000031521	Aga	1.369	4.86229e-08	No	Aga
Pgm2l1	15.49	10.63	6.95	5.79	1.76	0.91	1.21	3.02	-2.253	5.349e-05	Cysteine sulfinic acid decarboxylase	Csad	1.08173	ENSMUSG00000023044	Csad	1.378	4.6713e-15	No	Csad
Gprc5a	55.43	75.31	58.23	67.33	9.67	11.77	22.44	9.8	-2.249	1.44661e-22	Superoxide dismutase [Mn], mitochondrial	Sod2	1.36287	ENSMUSG00000006818	Sod2	1.411	2.18288e-29	Gprc5a	Sod2
Trmo	6.52	2.66	1.74	2.9	0	0	0.61	1.51	-2.249	0.00876123	Mammalian ependymin-related protein 1	Epdr1	1.71212	ENSMUSG00000002808	Epdr1	1.417	7.13204e-08	No	Epdr1
Socs2	53.79	54.94	41.72	57.19	14.95	10.86	9.1	6.79	-2.248	4.86356e-23	Chitinase domain-containing protein 1	Chid1	1.04163	ENSMUSG00000025512	Chid1	1.42	7.1591e-09	No	Chid1
Rab6b	25.27	17.72	16.51	9.41	10.55	4.53	2.43	0.75	-2.245	5.94729e-06		Chd3	1.06973	ENSMUSG00000018474	Chd3	1.431	4.31547e-82	No	Chd3
Gdap1l1	3.26	2.66	2.61	2.9	0	5.43	0	0.75	-2.239	0.0120546	Natural resistance-associated macrophage protein 2	Slc11a2	2.37764	ENSMUSG00000023030	Slc11a2	1.431	4.41527e-20	No	Slc11a2
Fam213a	9.78	9.75	5.21	12.31	2.64	4.53	1.21	0	-2.232	5.16912e-05	Annexin A7	Anxa7	1.26216	ENSMUSG00000021814	Anxa7	1.434	1.12197e-09	No	Anxa7
Lonp1	220.89	246.32	237.26	233.85	43.09	43.45	47.32	48.26	-2.224	4.43512e-105	Kinesin-like protein;Kinesin-like protein KIF14	Kif14	2.00462	ENSMUSG00000041498	Kif14	1.44	2.92533e-19	No	Kif14
Zc3hav1	230.67	241.89	264.2	229.5	42.21	38.92	58.84	49.02	-2.212	1.74323e-86	Short/branched chain specific acyl-CoA dehydrogenase, mitochondrial	Acadsb	1.25622	ENSMUSG00000030861	Acadsb	1.441	6.32781e-21	No	Acadsb
Dqx1	4.08	5.32	3.48	2.9	0.88	0	1.82	0	-2.212	0.00314292	Acyl-CoA:lysophosphatidylglycerol acyltransferase 1	Lpgat1	1.72594	ENSMUSG00000026623	Lpgat1	1.452	8.78857e-37	No	Lpgat1
Gm29650	7.34	7.97	7.82	5.79	0	0	2.43	2.26	-2.21	2.99107e-05	TRPM8 channel-associated factor 2	Tcaf2	1.0385	ENSMUSG00000029851	Tcaf2	1.46	5.27387e-05	No	Tcaf2
Ern1	7.34	4.43	9.56	10.86	2.64	0	1.21	2.26	-2.21	6.51864e-05	S-formylglutathione hydrolase	Esd	1.39914	ENSMUSG00000021996	Esd	1.471	9.37235e-108	No	Esd
Wars	127.97	106.33	104.29	129.59	26.38	18.1	25.48	21.87	-2.208	5.94834e-47	Protein-tyrosine-phosphatase;Receptor-type tyrosine-protein phosphatase kappa	Ptprk	1.76269	ENSMUSG00000019889	Ptprk	1.475	4.49919e-15	No	Ptprk
Ms4a4d	23.64	19.49	13.91	21.72	2.64	4.53	2.43	6.03	-2.208	4.47062e-10	Kelch domain-containing protein 4	Klhdc4	1.45197	ENSMUSG00000040263	Klhdc4	1.476	7.3002e-19	No	Klhdc4
Ezr	20.38	12.4	13.91	14.48	0	9.96	4.85	0	-2.208	7.2915e-06	Prolow-density lipoprotein receptor-related protein 1;Low-density lipoprotein receptor-related protein 1 85 kDa subunit;Low-density lipoprotein receptor-related protein 1 515 kDa subunit;Low-density lipoprotein receptor-related protein 1 intracellular domain	Lrp1	1.13953	ENSMUSG00000040249	Lrp1	1.486	2.62737e-54	Ezr	Lrp1
Xrcc3	0.82	5.32	4.35	7.24	0	2.72	0.61	0.75	-2.207	0.0078498	TBC1 domain family member 2B	Tbc1d2b	1.7502	ENSMUSG00000037410	Tbc1d2b	1.508	2.96776e-09	No	Tbc1d2b
Phf10	264.9	216.2	292.01	282.35	46.61	60.65	52.17	53.54	-2.206	8.29593e-83	Prelamin-A/C;Lamin-A/C	Lmna	-1.12994	ENSMUSG00000028063	Lmna	1.519	2.84218e-96	No	Lmna
H2afy2	11.41	16.84	14.77	13.03	1.76	3.62	1.21	4.52	-2.205	2.89398e-08	Ephrin type-B receptor 3	Ephb3	1.11355	ENSMUSG00000005958	Ephb3	1.527	7.15184e-11	No	Ephb3
Arrb2	63.58	53.16	57.36	57.92	10.55	11.77	13.35	9.8	-2.198	1.22625e-31	Long-chain-fatty-acid--CoA ligase 4	Acsl4	1.21111	ENSMUSG00000031278	Acsl4	1.528	1.62987e-27	No	Acsl4
Gm4419	4.89	0.89	2.61	2.9	1.76	0	0	0.75	-2.193	0.0166982	Catalase	Cat	1.02373	ENSMUSG00000027187	Cat	1.535	6.29641e-12	No	Cat
Cnbd2	5.71	11.52	5.21	5.79	3.52	8.15	0	0	-2.191	0.0033749	Nucleolar protein 3	Nol3	1.76869	ENSMUSG00000014776	Nol3	1.542	4.68829e-08	No	Nol3
Wisp1	371.67	375.69	386.74	410.5	83.54	86.9	76.43	62.59	-2.178	2.0329e-126	Reticulocalbin-1	Rcn1	1.4018	ENSMUSG00000005973	Rcn1	1.548	6.98805e-46	No	Rcn1
Ddb2	3.26	0.89	3.48	5.07	0.88	0	0	4.52	-2.175	0.0196208	Receptor-interacting serine/threonine-protein kinase 3	Ripk3	1.40303	ENSMUSG00000022221	Ripk3	1.549	7.30486e-24	No	Ripk3
Fosb	4.89	3.54	9.56	5.79	1.76	3.62	0	0.75	-2.174	0.00149412	Kinesin-like protein KIF18B	Kif18b	-2.06732	ENSMUSG00000051378	Kif18b	1.565	0.0011248	No	Kif18b
Edn1	166.28	160.38	151.22	152.76	36.05	37.11	27.3	29.41	-2.173	6.22389e-73	Ferritin heavy chain;Ferritin heavy chain, N-terminally processed	Fth1	1.84018	ENSMUSG00000024661	Fth1	1.568	4.34804e-89	No	Fth1
Ppp1r15a	163.83	178.1	162.52	146.24	34.29	32.59	30.94	33.94	-2.173	1.04975e-67	Chondroitin sulfate synthase 1	Chsy1	1.18213	ENSMUSG00000032640	Chsy1	1.573	4.07611e-23	No	Chsy1
Foxq1	2.45	1.77	2.61	2.17	0.88	0	0	0.75	-2.17	0.0193613	BAG family molecular chaperone regulator 3	Bag3	1.13375	ENSMUSG00000030847	Bag3	1.579	1.66193e-24	No	Bag3
Limch1	9.78	15.06	15.64	14.48	0.88	0.91	3.64	6.03	-2.16	5.28493e-07	SH3 domain-containing protein 19	Sh3d19	1.37137	ENSMUSG00000028082	Sh3d19	1.604	4.9435e-21	No	Sh3d19
Smarca1	11.41	13.29	11.3	13.76	2.64	6.34	1.82	1.51	-2.158	1.82154e-07	Probable glutathione peroxidase 8	Gpx8	1.00549	ENSMUSG00000021760	Gpx8	1.61	3.70231e-32	No	Gpx8
Exoc6	3.26	7.97	6.95	2.17	1.76	0.91	1.21	0	-2.142	0.00390839	Collagen alpha-2(I) chain	Col1a2	1.0275	ENSMUSG00000029661	Col1a2	1.614	7.27085e-286	No	Col1a2
Tsc22d3	65.21	34.56	53.88	51.4	4.4	12.67	13.35	10.56	-2.132	1.47488e-16		Mndal	-3.73025	ENSMUSG00000090272	Mndal	1.621	1.16973e-20	No	Mndal
Mex3b	9.78	12.4	15.64	13.03	2.64	2.72	0.61	4.52	-2.129	5.50408e-07	Serine/threonine-protein kinase DCLK1	Dclk1	1.10169	ENSMUSG00000027797	Dclk1	1.634	5.11133e-39	No	Dclk1
Otud1	23.64	15.06	15.64	13.76	1.76	2.72	6.07	3.02	-2.123	7.64733e-08	PDZ and LIM domain protein 5	Pdlim5	1.54523	ENSMUSG00000028273	Pdlim5	1.639	7.42807e-27	No	Pdlim5
Setdb2	1.63	3.54	6.08	3.62	0	0	4.25	0.75	-2.12	0.0162403		Tpm1	1.30508	ENSMUSG00000032366	Tpm1	1.668	2.21859e-276	No	Tpm1
Abca5	25.27	28.35	26.07	37.65	6.16	5.43	6.67	6.03	-2.116	1.72839e-13	Mannose-1-phosphate guanyltransferase alpha	Gmppa	1.3248	ENSMUSG00000033021	Gmppa	1.672	9.7658e-11	No	Gmppa
Ifih1	74.17	54.05	52.14	47.78	9.67	11.77	10.31	15.08	-2.106	9.95943e-21	Glutathione peroxidase 7	Gpx7	2.00974	ENSMUSG00000028597	Gpx7	1.693	0.000134585	Ifih1	Gpx7
Tmem140	15.49	31.01	21.73	17.38	0.88	5.43	6.07	3.77	-2.106	4.79517e-08	Collagen alpha-1(I) chain	Col1a1	1.1891	ENSMUSG00000001506	Col1a1	1.695	4.65599e-170	No	Col1a1
Cx3cr1	9.78	15.06	8.69	8.69	0	3.62	2.43	2.26	-2.105	9.89886e-06	Lactoylglutathione lyase	Glo1	1.04264	ENSMUSG00000024026	Glo1	1.709	1.40717e-40	No	Glo1
P3h2	8.15	15.95	8.69	9.41	0.88	3.62	0.61	3.77	-2.104	3.2696e-05	Calcium/calmodulin-dependent protein kinase type II subunit gamma	Camk2g	1.27022	ENSMUSG00000021820	Camk2g	1.72	1.6674e-20	No	Camk2g
Mcam	13.04	21.27	13.04	16.65	6.16	0.91	1.21	6.79	-2.099	2.04226e-06	Vinexin	Sorbs3	2.28473	ENSMUSG00000022091	Sorbs3	1.729	0.00966735	Mcam	Sorbs3
Irf7	37.49	47.85	50.41	45.61	13.19	9.05	6.67	10.56	-2.094	8.40833e-20	Palladin	Palld	1.40058	ENSMUSG00000058056	Palld	1.748	1.39302e-173	No	Palld
Gm16845	5.71	1.77	1.74	2.9	0	0	1.21	0.75	-2.094	0.0160866	Pyroglutamyl-peptidase 1	Pgpep1	2.08083	ENSMUSG00000056204	Pgpep1	1.755	7.99351e-17	No	Pgpep1
Uck1	50.53	67.34	66.92	53.57	12.31	12.67	12.74	12.82	-2.091	1.25673e-24	Coiled-coil domain-containing protein 12	Ccdc12	-1.03851	ENSMUSG00000019659	Ccdc12	1.756	1.20602e-07	No	Ccdc12
Cdkn2b	7.34	7.97	6.95	11.58	1.76	2.72	2.43	0	-2.087	4.33676e-05	Heat shock protein beta-6	Hspb6	3.32803	ENSMUSG00000036854	Hspb6	1.761	1.37496e-39	No	Hspb6
Aunip	61.13	72.66	39.98	70.23	13.19	12.67	12.13	16.59	-2.079	3.06393e-20	Transgelin	Tagln	1.24891	ENSMUSG00000032085	Tagln	1.763	5.18621e-95	No	Tagln
Smpdl3b	13.04	7.09	9.56	13.76	2.64	3.62	1.21	2.26	-2.077	5.28767e-06		Vcam1	1.08872	ENSMUSG00000027962	Vcam1	1.769	1.81211e-133	No	Vcam1
Abraxas1	22.01	30.13	20.86	23.89	4.4	3.62	4.85	7.54	-2.075	9.24109e-12	Cadherin-11	Cdh11	1.59047	ENSMUSG00000031673	Cdh11	1.8	3.21502e-96	No	Cdh11
Prr5l	9.78	15.95	17.38	17.38	0.88	0.91	4.85	5.28	-2.073	6.79444e-07	Dehydrogenase/reductase SDR family member 4	Dhrs4	2.14408	ENSMUSG00000022210	Dhrs4	1.803	1.37031e-15	No	Dhrs4
Acrbp	2.45	6.2	4.35	5.79	1.76	0	1.82	0	-2.068	0.0027225	Follistatin-related protein 1	Fstl1	1.2373	ENSMUSG00000022816	Fstl1	1.806	1.60503e-225	No	Fstl1
Klc3	4.89	4.43	10.43	7.24	0.88	4.53	0.61	1.51	-2.062	0.000957961		Fat1	1.97017	ENSMUSG00000070047	Fat1	1.844	3.34693e-17	No	Fat1
Tprn	4.08	5.32	3.48	5.79	1.76	0	0.61	1.51	-2.062	0.00124633	Forkhead box protein C1	Foxc1	3.59214	ENSMUSG00000050295	Foxc1	1.875	3.72313e-37	No	Foxc1
2010015M23Rik	2.45	3.54	3.48	4.34	0.88	0	1.82	0	-2.055	0.00769172	Glutamine--fructose-6-phosphate aminotransferase [isomerizing] 2	Gfpt2	2.75864	ENSMUSG00000020363	Gfpt2	1.878	1.32912e-06	No	Gfpt2
H1f0	505.35	497.08	511.02	490.14	113.43	90.52	117.68	111.61	-2.053	1.25792e-166	Glyoxalase domain-containing protein 4	Glod4	1.34246	ENSMUSG00000017286	Glod4	1.886	2.96096e-18	No	Glod4
3300005D01Rik	16.3	9.75	13.04	12.31	3.52	1.81	1.21	5.28	-2.053	1.1263e-06	PDZ and LIM domain protein 2	Pdlim2	1.02274	ENSMUSG00000022090	Pdlim2	1.893	4.22324e-71	No	Pdlim2
Whrn	2.45	2.66	6.08	1.45	0.88	0	0	3.02	-2.047	0.031504	Xanthine dehydrogenase/oxidase;Xanthine dehydrogenase;Xanthine oxidase	Xdh	1.72622	ENSMUSG00000024066	Xdh	1.903	4.96732e-33	No	Xdh
Ly75	132.04	121.39	114.72	130.32	18.47	35.3	26.08	30.16	-2.046	2.05345e-48	Ribosyldihydronicotinamide dehydrogenase [quinone]	Nqo2	2.58861	ENSMUSG00000046949	Nqo2	1.932	9.25456e-20	Ly75	Nqo2
D730003I15Rik	3.26	7.97	8.69	13.03	2.64	5.43	1.21	0	-2.045	0.00177401	O-acetyl-ADP-ribose deacetylase MACROD1	Macrod1	2.8554	ENSMUSG00000036278	Macrod1	1.935	9.85484e-07	No	Macrod1
Hgh1	44.83	36.33	46.93	33.3	12.31	9.96	6.67	7.54	-2.04	1.78301e-16	Annexin A1	Anxa1	1.78813	ENSMUSG00000024659	Anxa1	1.939	3.29336e-51	No	Anxa1
Ercc2	44.83	33.67	31.29	26.79	7.03	2.72	7.89	10.56	-2.04	2.72168e-12	Protein-glutamine gamma-glutamyltransferase 2	Tgm2	5.23174	ENSMUSG00000037820	Tgm2	1.942	5.09166e-32	No	Tgm2
Pitpnm2	17.93	24.81	14.77	29.68	8.79	10.86	2.43	1.51	-2.039	4.56361e-06	Tubulin beta-3 chain	Tubb3	2.06206	ENSMUSG00000062380	Tubb3	1.949	2.33714e-22	No	Tubb3
Adar	54.61	36.33	38.24	44.16	8.79	7.24	10.31	11.31	-2.038	1.7327e-17	Reticulocalbin-3	Rcn3	1.7475	ENSMUSG00000019539	Rcn3	1.954	5.79052e-111	Adar	Rcn3
Oxsm	4.08	7.09	1.74	3.62	2.64	1.81	0	0	-2.036	0.0122491	Amyloid beta A4 precursor protein-binding family B member 1-interacting protein	Apbb1ip	1.6924	ENSMUSG00000026786	Apbb1ip	1.955	6.65695e-33	No	Apbb1ip
Mb21d1	172.8	193.16	189.46	150.59	42.21	44.36	37.61	34.69	-2.033	1.07201e-55	Sodium/potassium-transporting ATPase subunit beta-1	Atp1b1	2.34241	ENSMUSG00000026576	Atp1b1	1.957	5.8433e-25	No	Atp1b1
Cmss1	45.64	31.9	37.37	41.27	13.19	6.34	5.46	11.31	-2.033	2.26359e-15	Suppression of tumorigenicity 5 protein	St5	1.46763	ENSMUSG00000031024	St5	1.97	4.40936e-35	Cmss1	St5
Dhfr	197.25	181.64	158.17	188.24	34.29	66.08	44.28	33.94	-2.032	3.69048e-50	Glutathione S-transferase Mu 2	Gstm2	1.18471	ENSMUSG00000040562	Gstm2	1.973	1.34573e-47	No	Gstm2
Tctn1	8.15	6.2	4.35	10.86	0.88	2.72	0	3.02	-2.032	0.000732053	6-phosphogluconate dehydrogenase, decarboxylating	Pgd	1.00273	ENSMUSG00000028961	Pgd	1.974	7.54192e-73	No	Pgd
Hist1h4h	9.78	6.2	5.21	7.24	1.76	0	2.43	1.51	-2.03	0.00014856	Protein FAM3C	Fam3c	2.89826	ENSMUSG00000029672	Fam3c	1.978	2.34136e-42	No	Fam3c
Dhx58	14.67	14.18	6.95	7.24	3.52	3.62	1.21	1.51	-2.026	6.09431e-05	Nuclear factor of activated T-cells, cytoplasmic 4	Nfatc4	2.16141	ENSMUSG00000023411	Nfatc4	1.986	7.86686e-52	Dhx58	Nfatc4
Cdk5r1	10.6	15.06	6.08	7.96	2.64	2.72	2.43	0.75	-2.022	6.49911e-05	Complement C3;Complement C3 beta chain;C3-beta-c;Complement C3 alpha chain;C3a anaphylatoxin;Acylation stimulating protein;Complement C3b alpha chain;Complement C3c alpha chain fragment 1;Complement C3dg fragment;Complement C3g fragment;Complement C3d fragment;Complement C3f fragment;Complement C3c alpha chain fragment 2	C3	5.64524	ENSMUSG00000024164	C3	1.994	9.97641e-69	No	C3
Rrp9	94.55	78.86	76.48	81.81	23.74	19.92	18.2	13.57	-2.021	3.47039e-33	Protein-methionine sulfoxide oxidase MICAL2	Mical2	1.07087	ENSMUSG00000038244	Mical2	1.994	5.84847e-31	Rrp9	Mical2
Pms2	28.53	40.76	41.72	39.09	4.4	5.43	10.31	12.82	-2.015	5.92293e-14	Immunity-related GTPase family Q protein	Irgq	1.18561	ENSMUSG00000041037	Irgq	2.002	6.56082e-15	No	Irgq
Zcwpw1	30.16	19.49	31.29	27.51	4.4	7.24	10.31	2.26	-2.015	8.27008e-10	Aminopeptidase B	Rnpep	3.31815	ENSMUSG00000041926	Rnpep	2.014	2.09325e-14	No	Rnpep
Mtss1	19.56	16.84	13.04	8.69	3.52	1.81	5.46	1.51	-2.015	5.87122e-06	Tropomyosin beta chain	Tpm2	1.73213	ENSMUSG00000028464	Tpm2	2.014	5.44345e-164	No	Tpm2
Lrba	10.6	14.18	9.56	17.38	3.52	4.53	2.43	1.51	-2.011	2.15876e-06	Matrix-remodeling-associated protein 8	Mxra8	2.41972	ENSMUSG00000029070	Mxra8	2.02	1.7767e-54	No	Mxra8
Ifi205	0.82	4.43	4.35	2.17	0.88	0	0	2.26	-2.01	0.0320437	Golgi integral membrane protein 4	Golim4	1.13057	ENSMUSG00000034109	Golim4	2.037	4.38682e-63	No	Golim4
Slc9a9	9.78	17.72	5.21	6.52	2.64	0.91	0.61	3.77	-2.008	0.000835056	Anthrax toxin receptor 1	Antxr1	1.35598	ENSMUSG00000033420	Antxr1	2.04	1.19887e-24	No	Antxr1
Dmxl2	4.08	2.66	5.21	2.9	0	0.91	1.21	0.75	-2.008	0.0054776	Medium-chain specific acyl-CoA dehydrogenase, mitochondrial	Acadm	1.17712	ENSMUSG00000062908	Acadm	2.062	4.64288e-21	No	Acadm
1110002L01Rik	18.75	15.06	19.99	27.51	7.91	4.53	4.85	0.75	-2.007	1.44613e-07	Profilin-2	Pfn2	1.48267	ENSMUSG00000027805	Pfn2	2.065	2.294e-09	No	Pfn2
Cited2	430.36	366.83	444.1	389.5	94.97	114.96	90.99	80.69	-2.003	1.95247e-93	Glutathione S-transferase Mu 1	Gstm1	1.30958	ENSMUSG00000058135	Gstm1	2.076	2.87284e-65	No	Gstm1
Pkd2	152.42	168.35	185.11	188.24	30.78	42.55	45.5	37.71	-2.003	2.90998e-56	Pleckstrin homology-like domain family A member 3	Phlda3	1.81905	ENSMUSG00000041801	Phlda3	2.087	2.66604e-36	No	Phlda3
Ahcyl2	13.86	15.95	5.21	10.14	2.64	0	3.03	3.77	-1.996	7.93547e-05	Talin-2	Tln2	3.1864	ENSMUSG00000052698	Tln2	2.108	6.72309e-26	No	Tln2
Wdr25	3.26	2.66	2.61	9.41	0.88	3.62	0	0.75	-1.994	0.0209524	Na(+)/H(+) exchange regulatory cofactor NHE-RF1	Slc9a3r1	1.89774	ENSMUSG00000020733	Slc9a3r1	2.114	8.53995e-13	No	Slc9a3r1
Bard1	20.38	16.84	10.43	9.41	1.76	2.72	7.28	2.26	-1.992	3.0803e-05	Tyrosine-protein kinase;Tyrosine-protein kinase JAK2	Jak2	3.09661	ENSMUSG00000024789	Jak2	2.13	1.26201e-30	No	Jak2
Rad54b	29.34	22.15	26.94	32.58	4.4	5.43	13.35	5.28	-1.99	1.8601e-10	Protein bicaudal C homolog 1	Bicc1	2.18529	ENSMUSG00000014329	Bicc1	2.136	7.57173e-104	No	Bicc1
Eme2	8.15	2.66	5.21	4.34	3.52	0	1.21	0.75	-1.986	0.00431153	Estradiol 17-beta-dehydrogenase 11	Hsd17b11	1.15845	ENSMUSG00000029311	Hsd17b11	2.154	5.68436e-24	No	Hsd17b11
Ddx51	19.56	17.72	14.77	18.1	16.71	0.91	4.25	3.77	-1.984	2.44968e-07	Versican core protein	Vcan	2.85233	ENSMUSG00000021614	Vcan	2.163	2.35287e-213	Ddx51	Vcan
Zfp382	3.26	0.89	1.74	3.62	1.76	0	0	0.75	-1.982	0.0350992	Type 2 phosphatidylinositol 4,5-bisphosphate 4-phosphatase	Tmem55a	1.55918	ENSMUSG00000028221	Tmem55a	2.17	1.36271e-24	No	Tmem55a
Mlkl	31.79	36.33	46.93	34.03	10.55	3.62	12.13	6.03	-1.979	4.07122e-13	Carboxypeptidase E	Cpe	2.45372	ENSMUSG00000037852	Cpe	2.181	3.57124e-111	Mlkl	Cpe
AU020206	39.12	28.35	49.54	32.58	10.55	6.34	9.1	7.54	-1.978	2.47696e-13	Protein-lysine 6-oxidase	Lox	1.76389	ENSMUSG00000024529	Lox	2.184	1.47371e-243	No	Lox
Ciapin1	277.13	324.3	290.27	303.35	62.43	63.37	78.86	69.38	-1.976	1.04039e-90	Protein C19orf12 homolog	1600014C10Rik	3.49693	ENSMUSG00000054676	1600014C10Rik	2.189	1.31142e-09	No	1600014C10Rik
Shmt2	533.87	501.51	543.17	485.07	114.31	126.73	118.9	119.9	-1.974	3.14423e-153	Homeobox protein Meis2	Meis2	1.69694	ENSMUSG00000027210	Meis2	2.194	7.58129e-65	No	Meis2
Pwp2	44.01	62.02	68.66	57.92	11.43	13.58	13.95	15.08	-1.974	6.18423e-21	PRKC apoptosis WT1 regulator protein	Pawr	5.6888	ENSMUSG00000035873	Pawr	2.227	5.88352e-28	Pwp2	Pawr
Zfp131	246.97	204.68	229.44	220.81	44.85	61.56	43.07	61.08	-1.971	7.49335e-67	Annexin A6	Anxa6	1.44824	ENSMUSG00000018340	Anxa6	2.339	5.32387e-176	No	Anxa6
Fkbp5	30.16	28.35	33.02	28.24	5.28	8.15	4.85	9.8	-1.969	1.01668e-14	Copine-8	Cpne8	2.45696	ENSMUSG00000052560	Cpne8	2.346	4.28799e-20	No	Cpne8
Tcte2	4.89	2.66	5.21	2.17	0	2.72	1.21	0	-1.961	0.0123119	MAGUK p55 subfamily member 2	Mpp2	2.30256	ENSMUSG00000017314	Mpp2	2.357	5.14376e-10	No	Mpp2
Trim25	146.71	146.2	120.8	153.48	36.93	25.35	29.72	43.74	-1.959	8.19378e-42	Collagen alpha-1(XVIII) chain;Endostatin	Col18a1	2.08101	ENSMUSG00000001435	Col18a1	2.358	7.60873e-15	No	Col18a1
Taf8	8.15	14.18	6.08	7.24	2.64	1.81	1.82	1.51	-1.956	0.000159703	Farnesyl pyrophosphate synthase	Fdps	-1.01534	ENSMUSG00000059743	Fdps	2.359	1.30599e-24	No	Fdps
Naa40	17.12	14.18	20.86	14.48	6.16	5.43	2.43	2.26	-1.951	7.19656e-08	Fibronectin type-III domain-containing protein 3A	Fndc3a	1.83027	ENSMUSG00000033487	Fndc3a	2.367	1.55055e-63	No	Fndc3a
Dnmt3b	8.15	4.43	6.95	1.45	1.76	0	0.61	2.26	-1.951	0.009305	Paired mesoderm homeobox protein 1	Prrx1	2.00204	ENSMUSG00000026586	Prrx1	2.433	3.50198e-158	No	Prrx1
Gm4924	23.64	11.52	17.38	15.2	5.28	0.91	10.31	2.26	-1.95	1.62969e-05	Secernin-1	Scrn1	2.78109	ENSMUSG00000019124	Scrn1	2.434	3.08517e-17	No	Scrn1
Gnb1l	13.04	7.97	10.43	19.55	2.64	2.72	1.82	4.52	-1.95	2.2124e-05	Destrin	Dstn	1.00181	ENSMUSG00000015932	Dstn	2.442	7.20366e-248	No	Dstn
Lrp2	4.08	3.54	3.48	5.07	0	0.91	0.61	3.77	-1.949	0.00657282	ADP-ribosylation factor GTPase-activating protein 3	Arfgap3	1.08306	ENSMUSG00000054277	Arfgap3	2.444	1.38389e-51	No	Arfgap3
Paip2b	58.69	52.28	50.41	49.95	12.31	12.67	14.56	9.8	-1.946	3.6191e-24	BTB/POZ domain-containing protein KCTD15	Kctd15	2.00022	ENSMUSG00000030499	Kctd15	2.473	2.10756e-11	No	Kctd15
Sirt1	57.87	39.87	58.23	43.44	12.31	15.39	10.92	9.05	-1.946	2.34563e-17	Growth arrest-specific protein 1	Gas1	4.84248	ENSMUSG00000052957	Gas1	2.476	6.06632e-124	No	Gas1
Ribc1	3.26	5.32	6.08	2.9	0	0.91	1.82	0.75	-1.944	0.00457543	Transmembrane protein 176B	Tmem176b	3.15491	ENSMUSG00000029810	Tmem176b	2.485	6.953e-270	No	Tmem176b
AL603745.3	9.78	5.32	3.48	7.96	1.76	0	1.82	2.26	-1.943	0.00102995	Nexilin	Nexn	1.9932	ENSMUSG00000039103	Nexn	2.495	1.43582e-118	No	Nexn
Zfp420	6.52	4.43	5.21	7.24	1.76	2.72	1.21	0	-1.941	0.000563922	Platelet-derived growth factor receptor alpha	Pdgfra	1.29361	ENSMUSG00000029231	Pdgfra	2.499	2.44642e-25	No	Pdgfra
Yae1d1	15.49	17.72	15.64	19.55	5.28	4.53	3.64	3.02	-1.939	3.26659e-09	Heat shock protein beta-8	Hspb8	1.07937	ENSMUSG00000041548	Hspb8	2.504	3.19223e-46	No	Hspb8
Slc3a2	749.05	674.29	770.87	623.35	163.56	151.17	171.67	187.78	-1.935	1.94373e-118	Microtubule-associated protein 1A;MAP1A heavy chain;MAP1 light chain LC2	Map1a	1.9987	ENSMUSG00000027254	Map1a	2.544	9.32579e-60	No	Map1a
Akna	5.71	2.66	0	5.07	0	1.81	0.61	0.75	-1.934	0.0292954	Glutaredoxin-1	Glrx	1.13308	ENSMUSG00000021591	Glrx	2.593	1.10188e-26	No	Glrx
Ifi44	143.45	152.4	145.14	128.14	33.41	34.4	37.61	29.41	-1.932	4.14722e-53	Thrombospondin-1	Thbs1	1.8567	ENSMUSG00000040152	Thbs1	2.608	5.17174e-118	No	Thbs1
Psd	3.26	4.43	1.74	1.45	0.88	0	1.21	0	-1.928	0.027722	Phosphoinositide phospholipase C;1-phosphatidylinositol 4,5-bisphosphate phosphodiesterase delta-1	Plcd1	2.51017	ENSMUSG00000010660	Plcd1	2.617	2.84881e-14	No	Plcd1
Hspbap1	16.3	15.95	31.29	15.93	2.64	1.81	5.46	6.79	-1.922	9.69676e-07	Guanine nucleotide-binding protein G(o) subunit alpha	Gnao1	4.05712	ENSMUSG00000031748	Gnao1	2.619	1.86764e-53	No	Gnao1
Pla2g4c	3.26	3.54	2.61	4.34	1.76	1.81	0	0	-1.921	0.00983308	Aspartyl aminopeptidase	Dnpep	1.49095	ENSMUSG00000026209	Dnpep	2.633	1.28156e-58	No	Dnpep
Mapk12	22.01	20.38	26.07	21.72	5.28	4.53	4.85	6.79	-1.92	1.49734e-11		Serpinb9	2.23774	ENSMUSG00000045827	Serpinb9	2.641	1.81024e-26	No	Serpinb9
Gdap10	4.08	7.97	12.17	3.62	2.64	0	0.61	3.02	-1.919	0.00552003	Pre-B-cell leukemia transcription factor 1	Pbx1	2.00208	ENSMUSG00000052534	Pbx1	2.643	6.97749e-140	No	Pbx1
D930016D06Rik	31.79	23.04	28.68	18.1	9.67	1.81	9.1	1.51	-1.917	4.55737e-07	Peptidyl-prolyl cis-trans isomerase FKBP7	Fkbp7	2.07677	ENSMUSG00000002732	Fkbp7	2.66	5.37493e-51	No	Fkbp7
Atxn7l2	8.97	7.09	6.95	3.62	1.76	0	2.43	1.51	-1.916	0.000954876	EH domain-containing protein 2	Ehd2	1.23943	ENSMUSG00000074364	Ehd2	2.688	1.12715e-95	No	Ehd2
Ccdc137	83.95	78.86	79.09	69.5	21.1	16.29	20.02	17.34	-1.912	2.0104e-32	Transforming growth factor beta-1-induced transcript 1 protein	Tgfb1i1	1.41082	ENSMUSG00000030782	Tgfb1i1	2.714	1.19065e-51	No	Tgfb1i1
Runx3	99.44	119.62	108.63	135.38	28.14	27.16	27.3	29.41	-1.911	6.97014e-36	Zinc finger C2HC domain-containing protein 1A	Zc2hc1a	1.68171	ENSMUSG00000043542	Zc2hc1a	2.718	7.81822e-58	No	Zc2hc1a
Tro	11.41	3.54	10.43	4.34	0.88	3.62	1.21	1.51	-1.911	0.00244657		Ifi204	1.00406	ENSMUSG00000073489	Ifi204	2.727	5.04177e-46	No	Ifi204
Lrrc75a	18.75	20.38	13.04	21	1.76	6.34	4.85	4.52	-1.909	2.64423e-08	Lymphocyte antigen 6A-2/6E-1	Ly6a	3.63022	ENSMUSG00000075602	Ly6a	2.74	1.41016e-264	No	Ly6a
Helz2	16.3	25.7	16.51	13.76	4.4	1.81	6.07	3.77	-1.907	3.84035e-07	Carbonyl reductase [NADPH] 3	Cbr3	4.00449	ENSMUSG00000022947	Cbr3	2.75	4.62236e-22	Helz2	Cbr3
Ccdc85c	8.97	20.38	18.25	15.2	3.52	4.53	5.46	0	-1.906	1.54863e-05	Nidogen-1	Nid1	1.98753	ENSMUSG00000005397	Nid1	2.808	4.6917e-69	No	Nid1
Epb41l4aos	137.75	161.26	132.1	165.07	35.17	38.92	34.58	37.71	-1.902	9.68014e-47	Testin	Tes	1.04947	ENSMUSG00000029552	Tes	2.83	1.86698e-128	No	Tes
Efcab2	9.78	7.09	3.48	8.69	3.52	0.91	2.43	0	-1.902	0.00127459	Rho GDP-dissociation inhibitor 2	Arhgdib	2.37858	ENSMUSG00000030220	Arhgdib	2.889	4.42778e-130	No	Arhgdib
Irf1	108.4	118.73	114.72	125.25	30.78	19.01	33.36	27.15	-1.9	1.37219e-41	Alpha-crystallin B chain	Cryab	4.06651	ENSMUSG00000032060	Cryab	2.911	1.63062e-39	No	Cryab
Exosc2	48.09	45.19	74.74	60.09	14.07	11.77	10.31	19.61	-1.896	2.906e-15	Four and a half LIM domains protein 1	Fhl1	4.00324	ENSMUSG00000023092	Fhl1	2.924	7.95195e-20	No	Fhl1
Timm8a1	19.56	23.04	19.12	8.69	8.79	4.53	1.82	4.52	-1.895	1.50488e-05	Aminopeptidase N	Anpep	5.64223	ENSMUSG00000039062	Anpep	2.949	4.31107e-08	No	Anpep
Taco1os	2.45	2.66	1.74	2.17	1.76	0	0.61	0	-1.894	0.0396087	Delta(24)-sterol reductase	Dhcr24	-1.58497	ENSMUSG00000034926	Dhcr24	2.949	1.58771e-26	No	Dhcr24
Hacd2	36.68	33.67	26.07	26.79	8.79	9.05	6.07	6.79	-1.892	1.24584e-12	RNA-binding protein with multiple splicing	Rbpms	3.50304	ENSMUSG00000031586	Rbpms	2.973	5.76565e-41	No	Rbpms
Reps1	39.94	17.72	48.67	29.68	5.28	4.53	10.92	12.07	-1.891	3.63113e-08		Lrrc32	2.2415	ENSMUSG00000090958	Lrrc32	2.976	2.29078e-52	No	Lrrc32
Gm15050	4.89	4.43	6.08	10.86	2.64	1.81	1.82	0	-1.891	0.00214214	Ankyrin-3	Ank3	1.03351	ENSMUSG00000069601	Ank3	2.999	8.17253e-116	No	Ank3
Mlf1	18.75	13.29	18.25	18.82	5.28	6.34	3.64	2.26	-1.887	2.00235e-08	Latexin	Lxn	1.83646	ENSMUSG00000047557	Lxn	3	1.14084e-48	No	Lxn
Trit1	16.3	15.06	19.99	9.41	1.76	4.53	2.43	6.03	-1.886	4.88054e-06		2210016F16Rik	2.19514	ENSMUSG00000021550	2210016F16Rik	3.029	1.53147e-19	No	2210016F16Rik
Camk1d	30.16	30.13	19.12	26.06	5.28	6.34	9.1	4.52	-1.879	2.25397e-10	Neuropilin-1	Nrp1	1.32233	ENSMUSG00000025810	Nrp1	3.105	1.99212e-73	No	Nrp1
Iah1	48.9	41.64	53.01	68.78	8.79	20.82	15.17	9.8	-1.874	4.12754e-14	Prostaglandin G/H synthase 1	Ptgs1	3.96362	ENSMUSG00000047250	Ptgs1	3.145	1.05537e-50	No	Ptgs1
Gm15892	6.52	2.66	1.74	8.69	1.76	1.81	0	1.51	-1.873	0.0146936	Death-associated protein 1	Dap	1.39104	ENSMUSG00000039168	Dap	3.146	9.37006e-120	No	Dap
Chd1l	23.64	23.04	21.73	21.72	7.03	7.24	4.85	3.77	-1.87	2.44267e-11	Prolyl 4-hydroxylase subunit alpha-3	P4ha3	1.87254	ENSMUSG00000051048	P4ha3	3.15	5.37107e-30	No	P4ha3
Gar1	152.42	124.93	141.66	134.66	25.5	32.59	35.79	45.25	-1.869	8.12415e-44	Tumor necrosis factor receptor superfamily member 6	Fas	1.0705	ENSMUSG00000024778	Fas	3.202	5.07914e-22	No	Fas
Adgrg6	14.67	19.49	35.63	18.1	7.91	0	4.85	5.28	-1.869	6.09834e-06	L-xylulose reductase	Dcxr	4.82653	ENSMUSG00000039450	Dcxr	3.211	6.85042e-58	No	Dcxr
Ndrg1	156.49	171.01	153.83	133.21	29.9	37.11	41.25	43.74	-1.863	5.47015e-46	Calcium-transporting ATPase	Atp2b4	1.40412	ENSMUSG00000026463	Atp2b4	3.216	1.73967e-38	Ndrg1	Atp2b4
Adi1	49.72	31.9	60.84	35.48	14.95	4.53	10.31	12.07	-1.862	1.16116e-10	Tubulin beta-2A chain	Tubb2a	1.15897	ENSMUSG00000058672	Tubb2a	3.221	6.18114e-107	Adi1	Tubb2a
Nsl1	7.34	10.63	15.64	7.96	4.4	0.91	1.21	3.77	-1.86	0.000190694	Microsomal glutathione S-transferase 1	Mgst1	3.49167	ENSMUSG00000008540	Mgst1	3.227	2.06807e-22	No	Mgst1
D6Wsu163e	39.12	30.13	33.89	23.17	4.4	11.77	7.28	8.3	-1.859	8.13849e-11	72 kDa type IV collagenase;PEX	Mmp2	3.90798	ENSMUSG00000031740	Mmp2	3.268	9.59443e-135	No	Mmp2
Fbxl14	4.08	6.2	8.69	6.52	0.88	1.81	1.82	1.51	-1.857	0.000637678	Cytokine receptor-like factor 1	Crlf1	2.51338	ENSMUSG00000007888	Crlf1	3.322	9.60105e-137	No	Crlf1
Fbxo42	19.56	15.06	23.47	18.82	6.16	2.72	8.49	2.26	-1.856	1.78501e-07	Guanidinoacetate N-methyltransferase	Gamt	1.98702	ENSMUSG00000020150	Gamt	3.352	5.11434e-24	No	Gamt
Gpatch3	3.26	3.54	4.35	4.34	0.88	0.91	0	9.8	-1.856	0.0162795	Serine protease inhibitor A3G	Serpina3g	-6.33995	ENSMUSG00000041481	Serpina3g	3.359	3.84856e-55	No	Serpina3g
Dck	22.82	21.27	31.29	23.17	3.52	8.15	4.85	8.3	-1.855	5.52147e-10		Maged2	1.91889	ENSMUSG00000025268	Maged2	3.365	6.83091e-89	Dck	Maged2
Bend4	7.34	11.52	8.69	13.03	2.64	5.43	1.82	1.51	-1.852	7.30833e-05	Cytochrome b5	Cyb5a	1.71641	ENSMUSG00000024646	Cyb5a	3.445	4.86282e-160	No	Cyb5a
Trim56	183.39	217.97	168.6	165.79	43.09	52.5	44.89	42.23	-1.849	3.42124e-49	Paired mesoderm homeobox protein 2	Prrx2	3.07331	ENSMUSG00000039476	Prrx2	3.449	1.53328e-107	No	Prrx2
Sdad1	188.28	198.48	203.36	209.95	47.48	51.6	69.76	41.48	-1.846	5.80841e-54	Isocitrate dehydrogenase [NADP] cytoplasmic	Idh1	1.25922	ENSMUSG00000025950	Idh1	3.501	5.94184e-35	Sdad1	Idh1
Tmem68	14.67	12.4	13.04	13.76	0.88	6.34	0.61	11.31	-1.845	0.000125138	Protein phosphatase 1 regulatory subunit;Protein phosphatase 1 regulatory subunit 12B	Ppp1r12b	4.10664	ENSMUSG00000073557	Ppp1r12b	3.53	2.98848e-23	No	Ppp1r12b
H1fx	126.34	133.79	88.65	116.56	33.41	28.97	31.54	27.15	-1.842	4.01584e-32	Serum amyloid A-3 protein	Saa3	5.67843	ENSMUSG00000040026	Saa3	3.577	0	H1fx	Saa3
Tmem81	4.08	2.66	3.48	2.9	1.76	0	0.61	0.75	-1.842	0.0129314	Neutrophil gelatinase-associated lipocalin	Lcn2	4.04248	ENSMUSG00000026822	Lcn2	3.595	4.5677e-264	No	Lcn2
Atad3a	96.18	91.26	72.13	87.6	27.26	21.73	18.81	21.87	-1.84	9.51894e-29	Epidermal growth factor receptor	Egfr	3.92677	ENSMUSG00000020122	Egfr	3.6	7.07885e-49	No	Egfr
Rtp4	103.51	77.09	101.68	104.25	30.78	24.44	19.41	26.39	-1.839	4.22197e-29	Epoxide hydrolase 1	Ephx1	2.74287	ENSMUSG00000038776	Ephx1	3.606	3.29853e-94	Rtp4	Ephx1
Kdm6b	23.64	23.92	18.25	24.62	9.67	5.43	4.85	4.52	-1.839	8.79791e-10	Thymosin beta-4;Hematopoietic system regulatory peptide	Tmsb4x	1.59012	ENSMUSG00000049775	Tmsb4x	3.632	5.35334e-251	No	Tmsb4x
4632404H12Rik	1.63	6.2	6.95	4.34	1.76	0	1.82	0.75	-1.839	0.00887603		Mettl7a1	3.97038	ENSMUSG00000054619	Mettl7a1	3.65	1.69546e-08	No	Mettl7a1
Rnaset2a	135.3	123.16	179.9	145.52	32.54	24.44	38.82	47.51	-1.838	1.57277e-30	Sorbin and SH3 domain-containing protein 1	Sorbs1	3.50173	ENSMUSG00000025006	Sorbs1	3.737	2.11171e-50	No	Sorbs1
Pus7	90.47	85.06	94.73	94.84	25.5	31.68	21.84	18.1	-1.835	6.14479e-34	Delta-sarcoglycan	Sgcd	3.33206	ENSMUSG00000020354	Sgcd	3.762	3.14294e-11	Pus7	Sgcd
Pgam5	85.58	49.62	79.09	65.16	16.71	19.92	21.84	13.57	-1.834	4.30599e-18	PTB-containing, cubilin and LRP1-interacting protein	Pid1	2.72412	ENSMUSG00000045658	Pid1	3.792	3.67991e-22	Pgam5	Pid1
Fjx1	8.15	15.95	18.25	7.24	0.88	5.43	2.43	3.77	-1.83	0.000236537	BTB/POZ domain-containing protein KCTD12	Kctd12	3.88073	ENSMUSG00000098557	Kctd12	3.819	0.000126829	No	Kctd12
Fsd1	8.15	9.75	6.08	11.58	5.28	1.81	1.82	1.51	-1.828	0.000204092	Myosin regulatory light polypeptide 9	Myl9	3.36891	ENSMUSG00000067818	Myl9	3.861	1.39286e-244	No	Myl9
Cdt1	163.01	166.58	223.35	206.33	51	43.45	68.55	39.21	-1.827	3.57211e-32		Lmo7	3.8129	ENSMUSG00000033060	Lmo7	3.868	3.87667e-51	No	Lmo7
Pithd1	56.24	45.19	53.01	44.89	11.43	7.24	13.95	16.59	-1.827	2.71222e-18	Cysteine-rich protein 1	Crip1	1.37434	ENSMUSG00000006360	Crip1	3.917	5.99475e-26	No	Crip1
Qtrt1	44.01	52.28	54.75	49.95	16.71	9.96	10.31	15.08	-1.826	2.15461e-19	Protein Niban	Fam129a	6.56518	ENSMUSG00000026483	Fam129a	3.968	1.33176e-85	No	Fam129a
Plk3	26.08	10.63	26.94	23.89	7.91	8.15	4.25	3.77	-1.826	3.73877e-07	Synaptopodin	Synpo	4.44379	ENSMUSG00000043079	Synpo	3.97	7.04504e-65	No	Synpo
Ccdc112	83.95	91.26	91.25	101.36	21.98	23.54	21.23	28.66	-1.821	1.59798e-33	Ceruloplasmin	Cp	4.53578	ENSMUSG00000003617	Cp	4.161	7.37541e-112	No	Cp
Armc7	3.26	0.89	1.74	3.62	0	0	0.61	1.51	-1.819	0.0435397	Collagen alpha-1(III) chain	Col3a1	1.63917	ENSMUSG00000026043	Col3a1	4.177	0	No	Col3a1
A830080D01Rik	31.79	57.59	41.72	59.37	19.35	12.67	11.53	9.05	-1.818	2.91269e-11	Creatine kinase B-type	Ckb	3.82267	ENSMUSG00000001270	Ckb	4.205	5.02752e-13	No	Ckb
Acy3	10.6	13.29	11.3	4.34	1.76	4.53	3.03	0.75	-1.818	0.000503247	UPF0317 protein C14orf159 homolog, mitochondrial	9030617O03Rik	3.53914	ENSMUSG00000021185	9030617O03Rik	4.392	7.88608e-29	Acy3	9030617O03Rik
H2-Q7	2.45	3.54	2.61	10.14	0	0.91	1.21	1.51	-1.818	0.0230549	4-aminobutyrate aminotransferase, mitochondrial	Abat	1.19478	ENSMUSG00000057880	Abat	4.404	1.2052e-09	No	Abat
Ammecr1	67.65	91.26	92.99	94.12	22.86	25.35	18.2	25.64	-1.817	8.17358e-26	Stromal cell-derived factor 1	Cxcl12	4.81044	ENSMUSG00000061353	Cxcl12	4.446	0	No	Cxcl12
Zfp961	8.15	7.09	8.69	10.86	0.88	4.53	1.82	2.26	-1.817	8.95907e-05	Collagen alpha-1(XII) chain	Col12a1	3.54062	ENSMUSG00000032332	Col12a1	4.506	1.34262e-164	No	Col12a1
Elac2	42.38	38.99	34.76	43.44	9.67	8.15	12.74	9.8	-1.816	8.17399e-17	Endosialin	Cd248	3.03271	ENSMUSG00000056481	Cd248	4.546	3.63949e-76	No	Cd248
Wdr76	55.43	58.48	51.28	68.78	20.22	11.77	18.2	4.52	-1.814	2.22741e-15	Retinol-binding protein 1	Rbp1	5.18103	ENSMUSG00000046402	Rbp1	4.569	2.75649e-98	No	Rbp1
Bbs12	3.26	1.77	6.95	6.52	0.88	2.72	0	1.51	-1.814	0.0142918		Akr1c14	1.31229	ENSMUSG00000033715	Akr1c14	4.589	7.22289e-08	No	Akr1c14
Slc16a10	7.34	5.32	9.56	5.07	4.4	1.81	0.61	1.51	-1.813	0.00146033	Monocyte differentiation antigen CD14	Cd14	1.76012	ENSMUSG00000051439	Cd14	4.651	4.08168e-15	No	Cd14
Fam107b	29.34	32.78	14.77	20.27	4.4	12.67	7.89	2.26	-1.811	5.22881e-06	NAD(P)H dehydrogenase [quinone] 1	Nqo1	5.33163	ENSMUSG00000003849	Nqo1	4.715	1.88617e-61	Fam107b	Nqo1
Fmod	2.45	0.89	2.61	3.62	0	0.91	0	1.51	-1.808	0.0430873		Serpina3i	-5.89159	ENSMUSG00000079014	Serpina3i	4.758	7.41576e-07	No	Serpina3i
Coro7	16.3	7.97	10.43	13.03	4.4	1.81	1.82	4.52	-1.805	2.72343e-05	Latent-transforming growth factor beta-binding protein 2	Ltbp2	3.74299	ENSMUSG00000002020	Ltbp2	4.923	2.59598e-147	No	Ltbp2
Agrn	54.61	55.82	53.01	52.13	7.91	14.48	26.69	12.82	-1.804	1.83355e-16	L-lactate dehydrogenase B chain;L-lactate dehydrogenase	Ldhb	4.49522	ENSMUSG00000030246	Ldhb	4.943	3.59002e-28	No	Ldhb
4930579G24Rik	4.08	1.77	2.61	1.45	0.88	0.91	0	0.75	-1.8	0.0405388	Neprilysin	Mme	9.55247	ENSMUSG00000027820	Mme	5.065	3.21408e-152	No	Mme
Timm9	128.78	77.97	132.1	115.84	41.33	27.16	27.9	30.92	-1.799	6.34185e-25	Immunoglobulin superfamily member 10	Igsf10	-1.62624	ENSMUSG00000036334	Igsf10	5.146	7.87106e-73	No	Igsf10
Macrod2	1.63	3.54	7.82	2.17	0	2.72	1.21	0	-1.796	0.0429598	Carbonyl reductase [NADPH] 2	Cbr2	4.01514	ENSMUSG00000025150	Cbr2	5.188	0	No	Cbr2
Adat3	0.82	7.09	5.21	5.07	0	0.91	6.07	0.75	-1.795	0.0398706	Acyl-coenzyme A thioesterase 1	Acot1	2.80595	ENSMUSG00000072949	Acot1	5.269	5.3612e-29	No	Acot1
Anxa9	3.26	5.32	4.35	6.52	0.88	0.91	0.61	3.02	-1.792	0.00482705	Thy-1 membrane glycoprotein	Thy1	5.48668	ENSMUSG00000032011	Thy1	5.275	1.46551e-144	No	Thy1
Gemin2	15.49	18.61	15.64	16.65	5.28	4.53	1.82	6.03	-1.786	1.20602e-07	Metalloreductase STEAP4	Steap4	4.82293	ENSMUSG00000012428	Steap4	5.295	8.1789e-13	Gemin2	Steap4
Agap1	92.1	72.66	83.43	61.54	16.71	17.2	20.62	26.39	-1.785	6.54841e-21	Guanine nucleotide-binding protein subunit alpha-14	Gna14	1.1612	ENSMUSG00000024697	Gna14	5.561	9.05388e-07	No	Gna14
Rbm12b1	3.26	2.66	2.61	4.34	2.64	0.91	0	0.75	-1.784	0.0207267	Embigin	Emb	5.87162	ENSMUSG00000021728	Emb	5.642	1.49959e-171	No	Emb
Gpn3	12.23	7.97	13.04	20.27	1.76	3.62	4.85	3.02	-1.781	4.90142e-05	Fatty acid-binding protein, adipocyte	Fabp4	5.11205	ENSMUSG00000062515	Fabp4	5.756	1.89125e-59	No	Fabp4
Wnk3	4.08	7.09	0.87	5.79	5.28	0	1.21	0.75	-1.781	0.0282926	Heat shock protein beta-1	Hspb1	8.48905	ENSMUSG00000004951	Hspb1	6.006	2.11615e-112	No	Hspb1
Got1	97.81	95.69	94.73	128.14	24.62	29.87	32.15	21.12	-1.78	5.12674e-27	Interleukin-1 receptor antagonist protein	Il1rn	2.57939	ENSMUSG00000026981	Il1rn	6.065	1.57654e-80	No	Il1rn
Dnmt3a	48.9	53.16	39.98	58.64	14.95	17.2	8.49	13.57	-1.78	3.4655e-15	Aldehyde oxidase 1	Aox1	1.78253	ENSMUSG00000063558	Aox1	6.283	2.31449e-12	No	Aox1
Ecscr	8.97	3.54	1.74	1.45	0.88	0.91	1.21	0	-1.777	0.0468353	Musculoskeletal embryonic nuclear protein 1	Mustn1	3.48542	ENSMUSG00000042485	Mustn1	6.315	2.02646e-127	No	Mustn1
Trnau1ap	46.46	61.14	41.72	31.13	9.67	26.25	12.13	8.3	-1.776	1.90417e-09	Ras-related protein Rab-32	Rab32	3.06667	ENSMUSG00000019832	Rab32	6.801	7.41446e-31	No	Rab32
Kif5c	19.56	31.01	25.2	21.72	7.91	8.15	6.67	3.02	-1.775	1.00476e-08	Dimethylaniline monooxygenase [N-oxide-forming] 1	Fmo1	3.4584	ENSMUSG00000040181	Fmo1	6.878	3.82728e-14	No	Fmo1
Paqr3	8.97	11.52	21.73	13.76	4.4	6.34	3.03	0.75	-1.775	0.000121751	Prostatic acid phosphatase	Acpp	4.13896	ENSMUSG00000032561	Acpp	7.091	9.44038e-20	No	Acpp
BC005561	101.88	101.9	116.46	104.25	26.38	19.01	32.76	30.92	-1.771	8.86002e-36	1-phosphatidylinositol 4,5-bisphosphate phosphodiesterase beta-1	Plcb1	1.68087	ENSMUSG00000051177	Plcb1	7.117	7.65837e-68	No	Plcb1
Frrs1	109.22	125.82	119.93	117.28	15.83	47.07	31.54	32.43	-1.77	8.73972e-31	Cytochrome P450 1B1	Cyp1b1	3.41631	ENSMUSG00000024087	Cyp1b1	7.191	0	No	Cyp1b1
Fzd3	21.19	12.4	24.33	18.1	8.79	5.43	3.03	4.52	-1.77	1.04827e-06	Calponin-1	Cnn1	7.42698	ENSMUSG00000001349	Cnn1	7.576	9.25647e-105	No	Cnn1
Ung	39.12	53.16	54.75	37.65	7.91	15.39	12.74	12.82	-1.767	6.81478e-14	Collagen alpha-1(XIV) chain	Col14a1	1.20107	ENSMUSG00000022371	Col14a1	7.604	3.14553e-24	No	Col14a1
Gm4951	7.34	13.29	13.91	7.24	3.52	4.53	2.43	0.75	-1.767	0.000261638	GDNF family receptor alpha-2	Gfra2	2.26766	ENSMUSG00000022103	Gfra2	7.629	3.14516e-63	No	Gfra2
Tnnc1	0	7.97	6.08	3.62	0.88	1.81	1.82	0	-1.767	0.0422426	Leukocyte elastase inhibitor A	Serpinb1a	6.60587	ENSMUSG00000044734	Serpinb1a	7.725	5.22317e-62	No	Serpinb1a
Upf1	157.31	165.69	152.96	163.62	36.93	50.69	48.53	30.92	-1.764	6.12387e-48	Cytidine deaminase	Cda	1.97749	ENSMUSG00000028755	Cda	7.817	7.70718e-23	No	Cda
Vps13a	83.95	85.95	84.3	106.43	22.86	15.39	28.51	26.39	-1.763	1.12394e-25	Actin, gamma-enteric smooth muscle	Actg2	5.25658	ENSMUSG00000059430	Actg2	7.884	0	Vps13a	Actg2
Pqlc2	12.23	10.63	7.82	7.96	2.64	14.48	1.21	2.26	-1.759	0.000517869		Kank1	1.60139	ENSMUSG00000032702	Kank1	7.962	1.34308e-78	No	Kank1
Zfp661	2.45	5.32	2.61	2.17	0.88	0	1.21	0.75	-1.759	0.0252223		2200002D01Rik	1.70637	ENSMUSG00000030587	2200002D01Rik	8.757	1.97379e-58	No	2200002D01Rik
Myc	63.58	62.02	39.98	52.85	11.43	16.29	21.23	10.56	-1.758	8.13739e-14	Matrix Gla protein	Mgp	3.8682	ENSMUSG00000030218	Mgp	9.172	0	No	Mgp
Atp6v0e2	6.52	3.54	3.48	4.34	1.76	1.81	1.21	0	-1.756	0.00605223	Prostacyclin synthase	Ptgis	6.93536	ENSMUSG00000017969	Ptgis	9.287	2.63405e-73	No	Ptgis
Mrpl1	48.9	51.39	49.54	63.71	15.83	19.01	10.31	14.33	-1.755	3.29996e-17	Leiomodin-1	Lmod1	5.89981	ENSMUSG00000048096	Lmod1	9.368	2.80499e-141	No	Lmod1
Rrp12	70.91	51.39	37.37	61.54	20.22	17.2	12.13	12.82	-1.753	2.54668e-13	Collagen alpha-1(II) chain;Collagen alpha-1(II) chain;Chondrocalcin	Col2a1	4.34126	ENSMUSG00000022483	Col2a1	10.085	0	Rrp12	Col2a1
Slit3	7.34	7.09	6.08	5.79	0.88	2.72	0	5.28	-1.751	0.00276414	Glia-derived nexin	Serpine2	6.21114	ENSMUSG00000026249	Serpine2	10.575	0	No	Serpine2
Cyp4v3	16.3	11.52	14.77	9.41	2.64	5.43	4.25	1.51	-1.748	1.54549e-05								No	No
Lrr1	16.3	20.38	13.91	16.65	7.03	0	7.28	1.51	-1.746	1.4851e-05								No	No
BC052040	21.19	13.29	22.6	10.14	7.03	5.43	2.43	3.77	-1.746	2.53285e-05								No	No
Arfrp1	117.37	91.26	100.81	121.63	21.98	32.59	32.76	29.41	-1.745	3.85969e-30								No	No
Gpt2	132.86	98.35	107.77	108.6	47.48	28.97	24.26	32.43	-1.744	9.11338e-26								No	No
Csf1	629.24	583.03	555.34	527.78	156.52	167.47	162.57	139.51	-1.743	1.35984e-104								No	No
Noc4l	84.77	72.66	90.38	90.5	17.59	29.87	23.05	22.62	-1.742	9.40348e-28								Noc4l	No
Nup54	27.71	28.35	22.6	24.62	7.03	10.86	3.64	7.54	-1.738	9.42832e-10								No	No
Zfhx2	10.6	3.54	7.82	9.41	3.52	2.72	1.21	1.51	-1.732	0.00105432								No	No
Ltbp4	15.49	10.63	10.43	11.58	5.28	1.81	3.64	2.26	-1.73	1.11959e-05								No	No
Rcor1	150.79	146.2	131.23	133.21	32.54	38.92	40.04	42.23	-1.726	4.44346e-47								No	No
Nop58	1389.7	1540.85	1490.47	1516.02	415.05	429.08	417.96	368.76	-1.725	1.12446e-171								No	No
Pcgf2	35.05	62.91	40.85	32.58	7.03	10.86	10.31	15.08	-1.721	3.69201e-10								No	No
Mafk	34.23	46.96	34.76	25.34	8.79	11.77	7.28	10.56	-1.721	4.39013e-10								No	No
Ppm1l	48.09	41.64	38.24	28.24	14.07	10.86	10.92	7.54	-1.72	2.023e-11								No	No
Tecpr2	15.49	13.29	9.56	14.48	2.64	2.72	5.46	3.02	-1.716	5.56365e-06								No	No
Esf1	780.84	748.72	801.29	836.92	235.66	220.88	226.87	174.96	-1.713	2.92295e-116								Esf1	No
Cdan1	6.52	4.43	6.08	5.79	2.64	0	2.43	0.75	-1.712	0.00188117								No	No
Hells	523.28	520.12	495.37	490.14	138.94	134.88	152.87	135.74	-1.711	2.78794e-130								Hells	No
Jade1	101.88	112.53	116.46	99.91	36.05	22.63	27.3	33.94	-1.711	4.38466e-33								No	No
Stam	70.1	71.77	47.8	62.99	28.14	17.2	12.74	18.85	-1.711	5.31698e-15								No	No
Plekhf2	22.01	19.49	26.07	18.82	4.4	7.24	6.07	6.03	-1.71	4.38327e-09								No	No
Tsr1	195.62	188.73	236.39	173.03	36.05	63.37	49.14	64.85	-1.703	1.13101e-34								No	No
Rab39b	47.27	44.3	33.02	47.78	8.79	13.58	10.31	15.84	-1.702	9.16107e-14								No	No
Parp10	44.01	28.35	32.16	25.34	12.31	5.43	8.49	9.05	-1.702	1.74939e-09								Parp10	No
Cnnm4	8.97	6.2	9.56	3.62	2.64	0.91	3.64	0	-1.701	0.00536473								No	No
Fyn	158.94	169.24	163.39	164.34	43.09	54.31	39.43	49.77	-1.699	1.0461e-53								No	No
Akap8l	79.06	74.43	70.4	76.02	16.71	20.82	22.44	23.38	-1.699	3.9058e-29								Akap8l	No
Atr	34.23	42.53	39.11	36.2	11.43	16.29	6.67	10.56	-1.698	1.33263e-12								No	No
Mfsd12	17.12	24.81	12.17	15.2	4.4	7.24	5.46	1.51	-1.695	1.36561e-05								No	No
Ttc8	11.41	5.32	11.3	8.69	5.28	1.81	1.82	2.26	-1.695	0.00044718								No	No
1700031P21Rik	6.52	7.97	5.21	5.79	0.88	2.72	1.21	2.26	-1.695	0.00115625								No	No
Trdmt1	3.26	7.09	4.35	2.9	1.76	1.81	0.61	0.75	-1.692	0.0120132								No	No
Clcn6	3.26	2.66	12.17	9.41	1.76	0	3.03	2.26	-1.692	0.014657								No	No
Ubqln4	59.5	75.31	67.79	76.74	14.95	20.82	18.2	24.89	-1.69	3.44924e-21								No	No
Brms1l	24.45	27.47	15.64	26.06	12.31	5.43	4.85	6.79	-1.689	2.37673e-07								No	No
Smg8	12.23	10.63	7.82	5.79	2.64	0.91	4.85	1.51	-1.688	0.000911613								No	No
Nudt5	17.93	11.52	41.72	25.34	9.67	9.05	3.64	3.02	-1.686	0.000162245								No	No
Akap1	34.23	46.96	46.06	41.99	9.67	11.77	18.2	9.05	-1.684	1.89906e-12								No	No
Cln8	56.24	48.73	65.18	54.3	9.67	25.35	17.59	14.33	-1.683	5.09567e-16								No	No
Tex30	40.75	25.7	37.37	52.85	12.31	11.77	12.74	7.54	-1.68	6.85247e-10								Tex30	No
Onecut2	8.97	7.97	8.69	12.31	3.52	2.72	3.64	0	-1.68	0.000254032								No	No
3110082I17Rik	26.9	44.3	43.45	21	10.55	5.43	12.74	9.05	-1.679	1.5597e-07								No	No
Srp54b	14.67	3.54	2.61	5.79	1.76	0	3.03	0.75	-1.678	0.0269938								No	No
Exd2	3.26	7.09	5.21	1.45	0.88	0.91	3.64	0	-1.678	0.0424702								No	No
Rcc1	70.91	73.54	79.96	55.02	17.59	21.73	18.81	21.87	-1.677	5.73111e-20								No	No
Sesn2	82.32	82.4	47.8	66.61	19.35	20.82	20.02	21.87	-1.676	4.25328e-17								No	No
Fitm2	22.82	23.04	7.82	18.1	5.28	4.53	7.28	3.77	-1.675	1.28199e-05								No	No
Rbm19	60.32	51.39	53.88	41.99	14.07	12.67	14.56	17.34	-1.673	1.94227e-16								Rbm19	No
Txnrd3	42.38	41.64	59.1	48.51	16.71	10.86	10.31	17.34	-1.673	5.76015e-14								No	No
Cdc45	76.62	50.51	54.75	52.85	17.59	12.67	16.99	17.34	-1.669	3.33267e-16								No	No
Tbpl1	72.54	47.85	66.05	39.09	14.07	17.2	27.3	10.56	-1.664	1.24192e-09								No	No
Hist1h4b	6.52	5.32	6.95	8.69	1.76	8.15	1.82	0.75	-1.659	0.00240131								No	No
Wdr43	1012.32	1020.74	980.32	1039.64	312.17	275.19	313.01	269.22	-1.658	5.83634e-164								No	No
Eif2ak2	102.7	84.18	115.59	118.01	28.14	39.83	32.76	23.38	-1.658	7.17056e-24								Eif2ak2	No
Stau2	16.3	14.18	20.86	18.1	8.79	6.34	4.25	1.51	-1.657	3.66282e-06								No	No
Nxph4	2.45	7.97	5.21	2.17	0.88	0.91	0.61	2.26	-1.654	0.0265839								No	No
Tmem18	24.45	30.13	27.81	24.62	10.55	5.43	6.07	9.05	-1.653	3.07022e-10								No	No
Tnc	56.24	50.51	60.84	44.89	13.19	10.86	15.77	22.62	-1.652	3.46099e-15								No	No
Aldh1l2	219.25	256.96	258.99	267.87	75.62	58.84	70.37	92.76	-1.651	1.87002e-48								No	No
Ptprf	123.08	143.54	181.64	130.32	19.35	45.26	38.82	49.02	-1.651	1.28658e-22								No	No
Zfp945	34.23	38.1	56.49	45.61	14.95	11.77	15.17	7.54	-1.65	4.82679e-11								No	No
Pole	83.14	70.88	73.87	75.29	17.59	27.16	21.23	22.62	-1.649	2.09367e-26								No	No
Wdr4	64.39	62.02	48.67	49.23	14.95	15.39	27.3	12.07	-1.648	2.53014e-13								No	No
Klhdc8b	7.34	6.2	8.69	12.31	2.64	2.72	2.43	2.26	-1.648	0.000409623								No	No
Cyr61	171.98	198.48	156.43	145.52	36.93	38.02	58.24	58.07	-1.639	1.58654e-29								No	No
Ppp2r5b	31.79	32.78	38.24	46.33	11.43	11.77	8.49	12.82	-1.637	1.32894e-11								No	No
Nop2	152.42	144.43	139.05	136.83	32.54	44.36	47.92	41.48	-1.632	1.17121e-44								No	No
Nes	166.28	133.79	149.48	158.55	43.97	36.21	45.5	52.79	-1.629	4.25214e-41								Nes	No
Coa7	55.43	67.34	56.49	58.64	25.5	12.67	12.74	22.62	-1.628	1.42162e-15								No	No
Pcbp3	33.42	25.7	27.81	26.06	9.67	7.24	10.92	3.02	-1.628	3.76274e-09								No	No
0610009O20Rik	43.2	23.92	20.86	39.82	7.03	5.43	11.53	12.82	-1.628	4.55737e-07								No	No
Lyar	353.74	320.75	351.98	363.44	124.87	107.72	87.96	101.05	-1.627	1.15371e-67								No	No
Ccdc14	17.12	13.29	13.91	2.9	1.76	3.62	6.67	2.26	-1.627	0.00246987								No	No
Noc2l	138.56	155.95	156.43	133.21	69.47	40.74	40.04	41.48	-1.626	5.32862e-33								No	No
Morn4	6.52	7.09	10.43	7.96	2.64	0.91	2.43	3.02	-1.626	0.000405144								No	No
Rassf1	256.75	236.58	246.82	232.4	66.83	85.09	45.5	77.67	-1.625	1.20037e-46								Rassf1	No
Hspa9	1124.8	1135.93	1219.32	1138.1	314.8	336.74	351.23	361.22	-1.624	4.33714e-198								No	No
Sbds	135.3	116.07	102.55	133.21	24.62	47.07	37.61	35.44	-1.624	4.2767e-26								Sbds	No
Zfp93	5.71	0.89	6.08	5.07	1.76	0	0.61	3.77	-1.616	0.0346572								No	No
Arc	1.63	3.54	4.35	3.62	0.88	0.91	0	2.26	-1.615	0.0341724								No	No
Ctnnal1	10.6	12.4	17.38	13.03	3.52	0	9.71	3.77	-1.614	0.000376402								No	No
Eif1	964.23	856.82	921.22	887.6	247.09	257.08	276.62	307.68	-1.612	6.81482e-136								No	No
Nol10	101.88	119.62	127.75	112.22	36.93	38.02	33.36	30.16	-1.612	3.96818e-32								No	No
Ifi27	316.25	300.37	331.12	311.31	85.3	103.2	95.85	92.76	-1.608	9.0454e-83								No	No
Ptpn21	47.27	38.99	47.8	34.03	13.19	15.39	11.53	10.56	-1.607	7.23343e-13								Ptpn21	No
Grina	393.68	365.94	300.7	338.1	96.73	113.15	106.16	107.84	-1.606	1.20875e-63								No	No
Haus6	108.4	89.49	127.75	121.63	34.29	42.55	29.72	30.92	-1.606	7.38791e-25								Haus6	No
Khk	4.89	4.43	4.35	7.24	0.88	1.81	1.82	1.51	-1.606	0.00436915								No	No
Mettl13	39.94	35.44	29.55	31.13	9.67	9.96	9.71	11.31	-1.603	4.20814e-12								No	No
Arpc5l	220.07	216.2	204.23	191.85	82.66	51.6	59.45	67.12	-1.601	7.98321e-47								No	No
Jdp2	122.26	137.34	133.84	145.52	43.09	39.83	44.89	33.94	-1.601	8.08215e-38								No	No
Nup188	58.69	69.11	59.97	74.57	14.95	19.01	18.81	30.16	-1.601	1.01904e-16								No	No
Gga3	34.23	23.92	44.32	34.75	10.55	9.05	12.74	8.3	-1.601	1.04451e-09								No	No
Rpl7l1	258.38	301.26	275.5	270.77	74.74	93.24	74.61	92	-1.6	1.26644e-60								No	No
Mbnl3	16.3	22.15	12.17	16.65	6.16	6.34	4.25	3.77	-1.6	3.99112e-06								No	No
Zbtb39	5.71	3.54	1.74	4.34	4.4	0	1.21	0.75	-1.599	0.0318224								No	No
Maml1	10.6	12.4	6.08	18.1	3.52	7.24	3.64	0.75	-1.596	0.00154524								No	No
Pan2	8.97	3.54	11.3	10.86	9.67	2.72	1.21	2.26	-1.59	0.00501431								No	No
Alad	77.43	69.11	66.92	98.46	17.59	24.44	24.26	25.64	-1.588	3.00144e-18								Alad	No
Rad51ap1	146.71	116.96	142.53	136.83	39.57	34.4	43.68	46	-1.586	4.59313e-37								No	No
Blm	61.13	60.25	63.44	62.99	14.07	19.01	24.87	16.59	-1.586	4.08324e-20								No	No
Haus1	54.61	50.51	73	46.33	18.47	16.29	18.2	12.82	-1.584	5.42816e-14								Haus1	No
Fam198b	46.46	51.39	44.32	55.75	8.79	14.48	17.59	17.34	-1.583	4.42072e-15								No	No
Clcn3	115.74	82.4	86.91	88.33	21.1	38.02	30.33	24.89	-1.58	4.03011e-20								No	No
Dis3l	21.19	22.15	20.86	27.51	4.4	11.77	6.67	6.79	-1.576	6.72449e-08								No	No
Srfbp1	11.41	17.72	19.99	10.14	6.16	3.62	3.64	4.52	-1.576	6.04333e-05								Srfbp1	No
Nfrkb	46.46	37.21	29.55	28.96	7.91	9.05	11.53	13.57	-1.575	1.23377e-09								No	No
Sft2d2	32.6	27.47	31.29	27.51	14.07	4.53	5.46	15.08	-1.575	9.71118e-08								No	No
Btbd8	7.34	8.86	2.61	4.34	0.88	1.81	3.03	0.75	-1.573	0.0131959								No	No
Rnf138	25.27	19.49	30.42	29.68	12.31	4.53	10.92	3.77	-1.571	6.7269e-07								No	No
Lrrc8d	13.86	11.52	19.99	19.55	6.16	2.72	6.67	3.77	-1.57	1.36282e-05								No	No
Pkmyt1	68.47	82.4	70.4	87.6	26.38	25.35	22.44	21.87	-1.568	3.04657e-21								No	No
Zcchc3	60.32	68.23	59.97	67.33	15.83	18.1	22.44	21.12	-1.565	4.71101e-21								No	No
Hmces	61.95	46.07	53.01	52.13	14.07	14.48	20.62	15.08	-1.565	3.67671e-16								No	No
Dpf2	93.73	71.77	106.9	70.23	26.38	23.54	26.69	26.39	-1.564	4.28173e-18								No	No
Ormdl3	50.53	42.53	44.32	57.92	11.43	19.92	17.59	11.31	-1.564	1.59514e-13								No	No
Pag1	13.04	10.63	7.82	5.79	1.76	2.72	1.82	5.28	-1.564	0.00148172								No	No
Cep57	362.71	341.13	275.5	309.86	93.21	119.49	101.3	92.76	-1.563	1.05344e-50								No	No
Rnf213	101.07	90.38	101.68	107.87	27.26	17.2	36.4	34.69	-1.563	1.77541e-25								Rnf213	No
Pnpla7	14.67	15.95	10.43	21	4.4	5.43	4.85	4.52	-1.562	1.69265e-05								No	No
Apmap	24.45	29.24	34.76	29.68	12.31	11.77	6.07	7.54	-1.561	3.32892e-09								No	No
Abhd10	13.04	17.72	24.33	21.72	4.4	5.43	7.89	5.28	-1.557	3.25753e-06								No	No
Twistnb	199.69	188.73	196.41	191.85	48.36	69.7	67.94	53.54	-1.556	1.83818e-51								No	No
Cotl1	88.03	98.35	121.67	101.36	29.02	29.87	31.54	34.69	-1.556	2.28731e-25								Cotl1	No
Ccdc92	2.45	3.54	6.08	3.62	0.88	0.91	1.82	0.75	-1.555	0.0210841								No	No
Mib2	48.09	28.35	34.76	31.13	12.31	8.15	18.2	6.79	-1.554	1.20137e-07								No	No
Mybl2	21.19	13.29	24.33	25.34	6.16	7.24	9.1	3.02	-1.554	4.3683e-06								No	No
Nup43	62.76	37.21	40.85	48.51	11.43	19.01	15.17	12.07	-1.553	3.85053e-11								No	No
Btf3l4	10.6	19.49	19.99	14.48	5.28	9.05	4.85	1.51	-1.553	0.00011112								No	No
Ccdc43	42.38	39.87	38.24	56.47	10.55	16.29	10.31	18.1	-1.552	4.96224e-11								No	No
Mllt1	19.56	21.27	23.47	18.1	6.16	8.15	7.28	3.77	-1.551	9.34165e-08								No	No
Fgd3	22.82	24.81	19.99	17.38	4.4	8.15	10.92	3.02	-1.551	3.51368e-06								No	No
Cdh24	3.26	6.2	3.48	5.07	1.76	1.81	1.21	0.75	-1.551	0.0110846								No	No
Mdn1	227.41	217.97	207.71	194.03	68.59	73.32	50.96	67.87	-1.55	1.77982e-44								Mdn1	No
Cdkn1c	21.19	18.61	26.94	26.79	5.28	7.24	8.49	7.54	-1.55	3.51728e-08								No	No
Azin1	255.93	249.87	224.22	272.22	78.26	83.28	78.86	73.9	-1.548	1.31193e-56								No	No
Syt13	45.64	33.67	71.26	56.47	19.35	14.48	19.41	7.54	-1.547	1.83361e-08								No	No
Zfp664	123.08	93.04	73	100.63	43.97	16.29	26.08	36.2	-1.544	7.65653e-13								No	No
Gak	100.25	109.87	89.52	91.22	30.78	27.16	41.86	24.89	-1.541	3.85331e-22								No	No
Pdcd2	36.68	32.78	49.54	45.61	15.83	11.77	10.31	14.33	-1.541	2.8272e-11								No	No
Tbkbp1	8.97	4.43	6.08	4.34	0.88	0	3.64	2.26	-1.541	0.0111016								No	No
Ajuba	84.77	67.34	74.74	93.39	24.62	21.73	27.9	25.64	-1.54	1.20935e-20								No	No
Wipi2	202.14	181.64	175.55	185.34	64.19	47.07	53.38	70.89	-1.539	9.6715e-43								No	No
Cables2	12.23	16.84	13.91	10.86	4.4	2.72	7.28	2.26	-1.539	9.695e-05								No	No
Slc2a6	8.97	4.43	3.48	10.14	0	2.72	3.03	2.26	-1.538	0.00996864								No	No
Timm10	100.25	105.44	85.17	115.11	26.38	38.02	30.94	33.18	-1.536	1.84504e-24								No	No
Parp14	60.32	80.63	70.4	69.5	25.5	19.01	23.66	19.61	-1.536	3.73082e-19								Parp14	No
Mad2l2	42.38	20.38	27.81	35.48	10.55	12.67	10.31	6.79	-1.536	1.24745e-07								No	No
Slc35e2	1.63	5.32	8.69	6.52	1.76	0.91	3.03	0.75	-1.534	0.0210099								No	No
Tspan15	10.6	9.75	3.48	13.76	3.52	1.81	3.03	3.77	-1.532	0.00165364								No	No
Trim44	70.1	70.88	73	52.85	21.98	19.01	20.02	23.38	-1.53	1.29436e-17								No	No
C1qbp	339.89	318.98	370.23	320.72	98.49	104.1	101.3	139.51	-1.529	3.39131e-58								No	No
Zmynd19	70.91	101.01	80.82	77.47	23.74	28.06	30.94	18.85	-1.529	9.9719e-18								No	No
Mcm4	122.26	135.57	129.49	118.73	26.38	37.11	41.86	62.59	-1.528	4.44477e-25								No	No
Gm19426	5.71	1.77	4.35	2.9	0.88	2.72	0.61	0.75	-1.528	0.0351446								No	No
Pcna	152.42	155.95	146.01	127.42	44.85	42.55	41.86	55.05	-1.524	1.06988e-34								No	No
Kansl3	103.51	124.05	106.9	100.63	27.26	37.11	38.82	33.18	-1.523	1.15304e-27								No	No
Tchp	35.05	25.7	30.42	34.03	9.67	9.05	12.13	8.3	-1.522	1.43264e-10								No	No
Tnpo2	240.45	216.2	190.33	217.19	76.5	67.89	70.37	61.08	-1.521	3.0925e-46								No	No
Gabpb2	76.62	79.75	99.07	81.81	32.54	24.44	24.26	26.39	-1.521	7.27865e-22								No	No
Dtx3l	53.79	60.25	58.23	56.47	18.47	9.05	18.2	22.62	-1.521	8.30869e-17								Dtx3l	No
Lars2	16.3	15.95	20.86	18.1	3.52	2.72	6.67	11.31	-1.521	9.18292e-06								No	No
Ptx3	1126.43	969.35	1109.81	975.93	319.2	339.46	301.49	397.42	-1.516	1.11162e-77								No	No
Wdr77	100.25	124.05	119.06	117.28	30.78	40.74	40.64	33.94	-1.515	3.18569e-29								No	No
Dcp2	68.47	63.8	50.41	62.99	26.38	12.67	18.81	21.12	-1.514	3.35856e-15								No	No
Mcm10	110.04	119.62	106.9	109.32	34.29	41.64	38.22	24.89	-1.513	9.12085e-29								No	No
Klf16	30.16	40.76	24.33	27.51	10.55	5.43	10.92	10.56	-1.512	2.7108e-08								No	No
Tnfrsf12a	61.95	63.8	62.57	56.47	17.59	25.35	19.41	16.59	-1.51	3.16873e-19								No	No
Srrd	35.86	19.49	18.25	28.96	7.91	9.96	7.89	6.79	-1.509	1.62151e-06								No	No
Vti1a	37.49	22.15	24.33	24.62	6.16	6.34	8.49	16.59	-1.508	1.8712e-06								No	No
Jam3	32.6	23.92	39.11	33.3	9.67	9.05	12.13	9.8	-1.507	1.11778e-09								No	No
Dimt1	9.78	25.7	4.35	13.03	2.64	2.72	4.25	4.52	-1.506	0.00387415								Dimt1	No
Rbbp8	141.82	179.87	178.16	199.82	62.43	60.65	56.42	51.28	-1.505	3.70607e-33								No	No
Snhg20	96.18	81.52	86.04	68.78	31.66	31.68	23.05	21.87	-1.505	1.85397e-18								No	No
Gen1	38.31	59.37	47.8	62.26	12.31	10.86	19.41	26.39	-1.505	1.79076e-09								No	No
Pdlim1	230.67	185.19	213.79	194.75	69.47	47.98	63.09	87.48	-1.501	4.27853e-33								Pdlim1	No
Pla2g12a	110.04	109.87	102.55	110.05	32.54	41.64	37.61	27.9	-1.5	2.49645e-31								No	No
Asns	416.5	466.07	440.62	455.38	150.37	129.45	185.62	128.2	-1.499	4.06159e-58								No	No
Slc6a9	107.59	125.82	97.34	115.84	38.69	36.21	36.4	33.18	-1.499	8.63178e-28								No	No
Dennd4a	36.68	36.33	38.24	26.79	11.43	16.29	7.28	11.31	-1.498	3.18047e-09								No	No
Phgdh	122.26	101.9	132.1	98.46	39.57	28.97	33.97	44.49	-1.491	1.16709e-22								No	No
Mcrip2	19.56	2.66	13.91	8.69	0.88	4.53	4.25	4.52	-1.491	0.00714078								No	No
Ccl27a	9.78	13.29	4.35	10.86	4.4	3.62	1.21	3.77	-1.487	0.00232587								No	No
Ret	2.45	5.32	3.48	5.79	0	1.81	1.82	1.51	-1.487	0.0211738								No	No
Chek1	82.32	58.48	67.79	57.19	21.1	20.82	20.62	22.62	-1.485	5.02396e-16								No	No
Cnbp	438.51	376.57	455.4	424.25	131.9	124.02	149.23	146.3	-1.484	5.96109e-74								No	No
Fnip2	25.27	21.27	14.77	21	8.79	3.62	7.89	6.03	-1.482	1.91065e-06								No	No
Slc25a26	5.71	4.43	5.21	2.17	1.76	2.72	0.61	0.75	-1.482	0.023854								No	No
Myl12b	75.8	50.51	41.72	55.02	16.71	22.63	15.77	15.84	-1.479	3.80607e-11								No	No
Plekhh3	17.12	6.2	12.17	11.58	3.52	1.81	3.64	6.03	-1.479	0.000754386								No	No
Prkrip1	103.51	85.06	112.11	91.95	28.14	27.16	32.15	39.97	-1.477	7.58408e-23								No	No
2810001G20Rik	0.82	15.95	11.3	11.58	2.64	5.43	2.43	3.77	-1.476	0.00846267								No	No
Spg11	4.08	4.43	7.82	3.62	0	1.81	1.21	4.52	-1.476	0.0262638								No	No
Ankrd9	6.52	2.66	2.61	4.34	1.76	0.91	0	3.02	-1.475	0.0417273								No	No
Tmed5	172.8	167.46	154.7	147.69	51	52.5	50.35	57.31	-1.473	7.52062e-41								No	No
Zfp7	17.93	18.61	18.25	14.48	3.52	2.72	6.67	9.8	-1.473	1.10488e-05								No	No
1500011B03Rik	17.93	12.4	12.17	22.44	7.03	9.05	3.64	3.02	-1.473	0.000166896								No	No
Mars2	10.6	11.52	5.21	7.96	2.64	1.81	5.46	1.51	-1.473	0.00306912								No	No
Polr3h	114.11	163.92	133.84	122.35	28.14	49.79	39.43	50.53	-1.472	1.81536e-20								Polr3h	No
Relb	34.23	38.1	35.63	37.65	12.31	13.58	13.95	6.79	-1.468	2.47882e-11								No	No
Unc119	35.86	36.33	36.5	37.65	11.43	12.67	12.13	12.07	-1.464	8.85662e-13								No	No
Dzip3	138.56	139.11	132.97	131.76	55.4	43.45	40.64	44.49	-1.463	1.79964e-36								No	No
Arih2	96.18	95.69	91.25	68.78	23.74	26.25	32.15	33.94	-1.463	3.85786e-19								No	No
C030034I22Rik	7.34	6.2	6.08	2.17	1.76	1.81	2.43	0.75	-1.463	0.0167908								No	No
Utp18	114.11	109.87	96.47	84.71	29.02	45.26	30.33	33.94	-1.462	5.57255e-20								No	No
Rpp38	38.31	38.99	44.32	52.85	16.71	10.86	18.2	11.31	-1.46	4.85559e-11								No	No
Slc1a5	87.21	99.24	92.12	81.81	24.62	25.35	33.97	33.18	-1.458	2.30082e-23								No	No
Mettl14	48.9	51.39	59.1	47.06	14.07	17.2	16.38	20.36	-1.457	3.71058e-15								No	No
Gigyf1	42.38	31.9	31.29	27.51	10.55	13.58	9.71	10.56	-1.455	3.56032e-09								No	No
Arxes1	5.71	13.29	7.82	2.9	1.76	1.81	4.25	0.75	-1.455	0.0248584								No	No
Ncapg2	101.88	127.59	119.06	91.22	41.33	46.17	29.72	31.67	-1.454	2.35432e-18								Ncapg2	No
Zfp946	10.6	15.95	13.91	13.03	4.4	7.24	3.64	3.02	-1.454	6.10051e-05								No	No
Trub1	30.16	23.92	20.86	26.06	6.16	9.96	10.92	6.03	-1.451	1.00137e-07								No	No
Yars	184.21	174.55	194.67	215.75	51.88	68.8	71.58	63.35	-1.45	7.11981e-39								No	No
Pole2	18.75	6.2	16.51	9.41	4.4	5.43	0	6.03	-1.45	0.00626753								No	No
Gtpbp2	12.23	19.49	12.17	10.86	2.64	5.43	5.46	3.77	-1.448	0.000158055								No	No
Orc5	28.53	23.04	17.38	27.51	5.28	11.77	6.67	9.05	-1.447	8.65126e-07								No	No
C030037D09Rik	4.89	7.09	5.21	4.34	2.64	0.91	1.82	1.51	-1.446	0.00876123								No	No
Dnajc28	4.89	4.43	2.61	5.79	0.88	0	3.64	1.51	-1.446	0.0302594								No	No
Pola2	29.34	35.44	53.88	30.41	7.91	13.58	9.1	16.59	-1.444	2.84305e-07								No	No
Rars	456.44	435.05	451.05	398.91	123.99	162.04	133.46	166.66	-1.443	9.5486e-62								No	No
Pltp	15.49	16.84	23.47	15.2	11.43	6.34	2.43	6.03	-1.442	0.000109594								No	No
Naa50	273.86	265.82	315.48	260.63	94.97	85.09	101.3	88.23	-1.44	3.76714e-52								No	No
Gtpbp1	167.91	156.83	153.83	165.07	55.4	57.93	57.63	46	-1.44	1.86902e-42								No	No
Stk19	85.58	81.52	86.91	100.63	29.9	39.83	30.33	20.36	-1.439	1.12157e-18								No	No
Bcl7b	44.01	51.39	37.37	39.09	15.83	13.58	15.17	12.82	-1.439	5.76141e-12								No	No
Shb	24.45	21.27	19.99	15.93	6.16	4.53	6.07	12.82	-1.438	9.92967e-06								No	No
Eif1ad	154.86	136.45	174.68	166.52	54.52	57.93	50.35	52.03	-1.437	9.15302e-35								No	No
Gemin5	62.76	48.73	43.45	49.23	14.07	14.48	21.23	17.34	-1.437	1.16449e-12								No	No
Atg2b	42.38	23.04	26.07	18.82	8.79	4.53	10.31	9.8	-1.436	1.04624e-05								No	No
Gm15834	4.89	8.86	16.51	9.41	5.28	3.62	2.43	1.51	-1.436	0.00552637								No	No
Msl2	46.46	71.77	63.44	60.09	35.17	19.01	20.62	15.84	-1.435	5.33288e-11								No	No
Dld	120.63	116.96	105.16	105.7	30.78	40.74	45.5	32.43	-1.434	1.78002e-26								No	No
Slc7a11	84.77	85.95	112.98	72.4	22.86	19.92	33.97	38.46	-1.434	9.71123e-14								No	No
Grem2	20.38	26.58	15.64	28.24	6.16	8.15	7.28	9.05	-1.434	2.46485e-06								No	No
Pik3cb	15.49	23.04	27.81	15.2	5.28	7.24	10.92	3.77	-1.432	8.77811e-05								No	No
Zfp955a	13.86	4.43	4.35	8.69	0	4.53	3.64	1.51	-1.431	0.0209213								No	No
Bbs4	27.71	21.27	18.25	14.48	7.03	2.72	12.13	6.03	-1.43	0.000111242								No	No
Eif6	385.53	383.66	383.26	410.5	152.13	125.83	132.24	127.45	-1.429	1.27372e-74								No	No
2610301B20Rik	25.27	24.81	19.12	20.27	2.64	9.05	8.49	8.3	-1.428	7.73514e-07								No	No
Nmd3	78.25	92.15	66.05	74.57	26.38	38.02	20.02	27.15	-1.426	9.77445e-15								No	No
Mvb12b	55.43	35.44	44.32	36.2	25.5	7.24	17.59	11.31	-1.426	2.19093e-07								No	No
Dhx15	404.28	366.83	338.94	344.61	130.14	133.07	118.9	113.87	-1.425	2.89975e-60								No	No
Dnaja3	23.64	23.04	29.55	21	3.52	8.15	10.31	9.05	-1.425	4.05762e-07								No	No
Ncoa1	13.86	17.72	13.91	18.82	3.52	11.77	5.46	4.52	-1.422	5.04666e-05								No	No
Krt19	7.34	9.75	6.95	9.41	0	1.81	4.25	3.77	-1.422	0.00214881								No	No
Nbea	53.79	90.38	46.93	68.78	12.31	26.25	23.66	20.36	-1.421	2.53656e-09								No	No
Smg7	251.04	259.61	213.79	247.6	82.66	72.42	95.24	79.18	-1.42	9.25921e-45								No	No
Ccdc86	85.58	101.9	84.3	93.39	27.26	41.64	24.26	35.44	-1.42	6.13945e-19								No	No
2310061I04Rik	22.01	24.81	33.02	25.34	21.1	9.05	9.1	3.77	-1.42	1.07017e-05								No	No
Psmg3	66.02	69.11	94.73	56.47	29.02	15.39	18.81	32.43	-1.417	2.90726e-10								No	No
Nol6	72.54	39.87	55.62	57.19	22.86	13.58	20.02	20.36	-1.416	5.39077e-11								No	No
Get4	7.34	6.2	15.64	10.86	4.4	3.62	2.43	3.02	-1.414	0.00242772								No	No
Ero1l	110.85	132.91	103.42	108.6	41.33	33.49	33.36	47.51	-1.411	1.43901e-22								No	No
Afg1l	4.89	4.43	6.95	8.69	3.52	1.81	1.21	2.26	-1.411	0.00778931								No	No
Cldn12	50.53	38.99	55.62	43.44	15.83	18.1	12.13	19.61	-1.407	1.64766e-11								No	No
Zfp933	7.34	7.97	7.82	6.52	2.64	4.53	1.82	1.51	-1.407	0.00251069								No	No
Zfp213	8.97	5.32	13.04	5.79	3.52	3.62	1.82	2.26	-1.407	0.00555429								No	No
Ppid	211.92	231.26	249.43	254.12	84.42	87.81	74.61	82.2	-1.406	8.15137e-45								No	No
Shmt1	54.61	58.48	59.97	64.43	14.95	19.01	21.84	24.89	-1.405	2.05151e-16								No	No
Tlk2	382.27	371.26	311.13	351.85	123.11	155.7	114.04	117.64	-1.404	1.34573e-47								No	No
Smg5	82.32	54.05	57.36	57.92	23.74	21.73	23.66	12.82	-1.404	1.42528e-11								No	No
Zfhx4	92.92	92.15	86.04	66.61	29.02	19.92	40.64	27.9	-1.402	5.15977e-14								No	No
Nceh1	56.24	64.68	50.41	35.48	26.38	13.58	19.41	15.08	-1.402	5.98616e-09								No	No
Ifrd1	293.43	308.35	338.07	335.2	108.16	100.48	105.55	131.97	-1.401	2.95606e-52								Ifrd1	No
Tcn2	11.41	7.09	16.51	10.14	7.03	1.81	1.21	6.03	-1.401	0.00411522								No	No
Apba3	21.19	19.49	19.99	15.2	4.4	5.43	6.07	9.8	-1.4	4.77507e-06								Apba3	No
Sepsecs	9.78	4.43	13.04	15.93	4.4	0.91	4.85	4.52	-1.399	0.0034756								No	No
Gm26917	1652.97	1527.56	1609.53	1631.85	562.78	569.39	541.1	558.8	-1.397	5.43571e-204								No	No
Ube2g2	54.61	36.33	57.36	49.23	17.59	9.05	20.62	18.1	-1.397	2.16467e-10								No	No
Gk	30.16	23.04	21.73	21	7.03	10.86	7.89	7.54	-1.397	3.2711e-07								No	No
Parp9	52.16	80.63	57.36	75.29	20.22	20.82	27.3	22.62	-1.395	2.45782e-12								Parp9	No
Zdhhc18	21.19	23.04	27.81	29.68	6.16	9.96	7.89	11.31	-1.395	1.83836e-07								No	No
Tcof1	371.67	397.84	435.41	358.37	128.38	134.88	143.16	131.22	-1.393	3.42441e-61								No	No
6330408A02Rik	14.67	24.81	14.77	14.48	4.4	5.43	4.25	10.56	-1.392	0.000205073								No	No
Noct	31.79	39.87	39.98	30.41	13.19	9.05	14.56	11.31	-1.391	1.36865e-09								No	No
Slc39a6	294.24	264.93	255.51	280.9	87.93	130.35	101.91	80.69	-1.39	7.63966e-41								No	No
Trmt10c	30.16	36.33	34.76	26.06	11.43	19.92	10.31	7.54	-1.389	1.29208e-07								No	No
Clcn7	23.64	27.47	34.76	25.34	11.43	14.48	8.49	4.52	-1.388	1.42855e-06								No	No
Ppif	13.86	16.84	17.38	14.48	5.28	8.15	3.64	5.28	-1.388	1.81194e-05								Ppif	No
Slc25a16	14.67	7.97	7.82	7.24	0.88	3.62	8.49	2.26	-1.388	0.00959842								No	No
Hemk1	13.86	14.18	14.77	10.86	6.16	2.72	6.07	3.02	-1.387	9.22039e-05								No	No
Zfp850	12.23	8.86	4.35	11.58	0.88	1.81	4.25	5.28	-1.387	0.00550525								No	No
Rrp1b	103.51	142.66	150.35	128.14	51	55.22	43.07	38.46	-1.385	1.29253e-20								No	No
Mboat2	6.52	4.43	4.35	4.34	0.88	7.24	1.82	0.75	-1.384	0.0248584								No	No
Glce	60.32	69.11	79.09	68.78	24.62	26.25	18.2	28.66	-1.383	1.51625e-15								No	No
Lca5	10.6	10.63	13.91	7.24	9.67	1.81	4.85	1.51	-1.383	0.00346712								No	No
E2f2	22.82	16.84	13.04	5.07	4.4	6.34	6.07	3.77	-1.382	0.00207507								No	No
Nat10	39.94	28.35	31.29	50.68	13.19	10.86	11.53	15.84	-1.381	7.85929e-08								No	No
Lars	715.64	713.28	665.71	671.13	236.54	233.55	238.4	260.93	-1.38	2.47083e-111								No	No
Rnf167	10.6	6.2	8.69	6.52	1.76	0.91	3.03	6.03	-1.38	0.00553219								No	No
Pigw	8.97	11.52	13.04	6.52	4.4	0.91	5.46	2.26	-1.379	0.00270371								No	No
Wdr5	94.55	79.75	79.96	85.43	33.41	25.35	32.15	27.9	-1.377	5.30911e-22								No	No
Mettl5	10.6	22.15	30.42	22.44	0.88	11.77	6.07	9.8	-1.375	0.00089467								No	No
Tank	49.72	50.51	39.11	47.78	14.07	12.67	16.38	31.67	-1.374	6.5022e-10								No	No
Tarbp1	7.34	9.75	5.21	2.17	7.91	1.81	1.21	1.51	-1.374	0.047662								No	No
Usp36	187.47	261.39	195.54	200.54	81.78	66.08	78.86	53.54	-1.373	2.08985e-25								No	No
Pitpnb	100.25	73.54	89.52	84.71	28.14	28.97	27.9	37.71	-1.373	6.00599e-19								No	No
B230354K17Rik	80.69	96.58	92.12	111.49	36.93	38.92	32.76	27.15	-1.372	3.8009e-18								No	No
Timeless	126.34	131.14	119.93	115.84	53.64	31.68	43.68	44.49	-1.368	2.07645e-26								Timeless	No
Trmt10b	13.86	14.18	16.51	16.65	3.52	8.15	3.64	6.79	-1.368	3.24756e-05								No	No
Cfap43	43.2	27.47	32.16	34.75	10.55	7.24	15.77	13.57	-1.367	3.51728e-08								No	No
Tor2a	30.16	34.56	28.68	31.13	6.16	11.77	12.13	12.82	-1.364	2.97778e-09								No	No
Sh2b2	17.12	14.18	19.99	13.76	7.03	0.91	5.46	7.54	-1.364	8.56324e-05								No	No
Afdn	146.71	146.2	181.64	171.58	53.64	57.03	63.09	54.3	-1.363	3.39281e-31								No	No
Lin54	59.5	73.54	56.49	53.57	25.5	18.1	22.44	18.85	-1.363	1.39466e-13								No	No
Tyro3	15.49	21.27	26.94	23.89	10.55	6.34	4.85	9.8	-1.363	1.54241e-05								No	No
Zbtb11	110.85	118.73	106.03	127.42	51.88	37.11	37.61	42.23	-1.361	3.53961e-24								No	No
Med20	58.69	82.4	85.17	68.78	25.5	28.06	27.3	24.13	-1.361	5.77196e-15								No	No
Dkc1	1007.43	1105.8	831.71	1070.77	329.75	394.68	399.76	334.07	-1.36	4.94296e-54								No	No
Tex9	53.79	46.96	54.75	53.57	19.35	19.92	20.62	14.33	-1.36	8.98777e-15								No	No
Eci1	35.86	35.44	24.33	34.75	8.79	7.24	15.77	12.82	-1.36	8.35919e-08								No	No
Naa25	215.18	210.88	202.5	228.78	73.86	76.94	69.15	87.48	-1.357	5.17606e-44								No	No
Itga3	34.23	45.19	43.45	31.13	9.67	18.1	15.17	11.31	-1.356	1.0673e-08								Itga3	No
Donson	30.16	23.04	24.33	34.03	9.67	15.39	7.28	9.8	-1.356	6.6475e-07								No	No
H3f3b	906.36	835.55	1031.6	818.82	328.87	272.47	301.49	393.65	-1.355	9.82878e-46								No	No
Tapbp	294.24	284.42	223.35	283.08	87.05	105.91	117.08	77.67	-1.355	1.03626e-30								Tapbp	No
Ets1	52.16	55.82	41.72	55.75	13.19	18.1	20.62	20.36	-1.355	1.63179e-12								No	No
Kmt5a	289.35	298.6	312.87	266.42	106.4	96.86	105.55	106.33	-1.354	4.383e-54								No	No
Tomm70a	299.95	273.79	369.36	293.21	114.31	79.66	117.08	106.33	-1.354	4.15361e-36								No	No
Mif4gd	8.97	8.86	17.38	19.55	7.03	5.43	5.46	1.51	-1.345	0.00241475								No	No
Dclre1b	6.52	11.52	5.21	7.24	4.4	0.91	3.64	1.51	-1.345	0.00859711								No	No
Zbtb40	8.97	8.86	6.95	5.07	4.4	0.91	0.61	5.28	-1.345	0.0152791								No	No
Exosc1	115.74	126.71	114.72	117.28	30.78	43.45	44.28	48.26	-1.344	1.68234e-27								No	No
Poli	7.34	8.86	4.35	2.9	4.4	0	1.21	3.02	-1.344	0.0416467								No	No
Mtrr	49.72	52.28	56.49	39.09	12.31	21.73	15.77	21.12	-1.341	1.16445e-10								No	No
Zfp111	28.53	14.18	19.12	21.72	10.55	3.62	5.46	10.56	-1.341	0.000108133								No	No
Prtg	9.78	12.4	11.3	13.76	5.28	4.53	2.43	5.28	-1.341	0.000283455								No	No
Atrnl1	4.89	9.75	4.35	7.24	3.52	2.72	2.43	0.75	-1.341	0.0126965								No	No
Ttc39b	78.25	85.95	77.35	70.23	31.66	26.25	29.12	24.89	-1.34	3.59727e-19								Ttc39b	No
Paxbp1	93.73	102.78	87.78	94.12	34.29	32.59	35.79	33.18	-1.339	2.1197e-24								No	No
Mtmr3	36.68	30.13	24.33	34.03	11.43	11.77	12.13	9.8	-1.339	1.8937e-08								No	No
Snrnp35	6.52	13.29	8.69	6.52	0.88	3.62	4.85	2.26	-1.339	0.00669497								No	No
Cep162	113.3	112.53	115.59	131.04	47.48	45.26	44.28	34.69	-1.337	1.42863e-25								No	No
Spin4	5.71	8.86	16.51	6.52	0	3.62	6.67	2.26	-1.337	0.0244782								No	No
Rdm1	17.93	17.72	21.73	17.38	9.67	3.62	7.89	5.28	-1.333	8.74694e-06								No	No
Cdc6	67.65	77.97	83.43	60.09	23.74	24.44	26.69	28.66	-1.332	3.45834e-15								No	No
Zfp367	43.2	32.78	46.06	42.71	15.83	12.67	11.53	24.13	-1.332	9.12724e-09								No	No
Nsun5	14.67	14.18	5.21	31.13	5.28	9.05	3.64	3.77	-1.332	0.00802444								Nsun5	No
Atad5	125.52	130.25	131.23	89.77	44.85	49.79	44.89	38.46	-1.33	6.39069e-20								Atad5	No
Chchd4	70.1	61.14	69.53	57.92	27.26	19.01	21.84	25.64	-1.33	1.02971e-15								No	No
Pogz	39.94	26.58	60.84	40.54	20.22	12.67	15.17	10.56	-1.33	1.30959e-06								No	No
Usp39	121.45	116.96	133.84	100.63	51.88	28.97	50.35	35.44	-1.328	2.57314e-17								No	No
Rhebl1	51.35	66.45	72.13	64.43	21.98	16.29	23.05	39.21	-1.328	1.04799e-10								No	No
Rnf123	9.78	27.47	15.64	26.06	7.03	3.62	10.92	6.79	-1.327	0.000862763								No	No
Tmem251	13.86	11.52	5.21	13.03	4.4	4.53	2.43	5.28	-1.325	0.00188843								No	No
Setd6	18.75	24.81	32.16	26.06	9.67	10.86	9.1	7.54	-1.324	1.59165e-06								No	No
Slc30a1	13.04	14.18	12.17	12.31	7.91	4.53	1.21	5.28	-1.324	0.000600512								No	No
Mthfd2l	13.86	20.38	23.47	19.55	6.16	7.24	4.25	24.89	-1.322	0.000664362								No	No
Stat2	54.61	62.91	56.49	72.4	21.1	19.92	31.54	18.85	-1.321	1.07048e-11								No	No
Rabepk	69.28	77.09	60.84	62.26	17.59	29.87	23.66	27.15	-1.32	1.05555e-14								No	No
Tmem209	56.24	61.14	45.19	60.09	25.5	19.01	10.92	23.38	-1.317	7.61482e-10								Tmem209	No
Anapc16	96.99	102.78	99.07	120.9	36.93	35.3	49.74	33.18	-1.316	1.23619e-18								No	No
Sord	82.32	93.04	91.25	84.71	35.17	26.25	33.97	32.43	-1.313	1.037e-21								No	No
Ppie	16.3	8.86	22.6	16.65	4.4	8.15	4.85	6.79	-1.312	0.000350498								No	No
Socs7	58.69	38.1	66.92	40.54	19.35	14.48	20.02	18.85	-1.311	1.54844e-08								No	No
Ank2	67.65	86.83	80.82	58.64	25.5	27.16	32.76	21.12	-1.31	2.01795e-12								No	No
Ssh2	26.08	24.81	14.77	28.96	2.64	9.96	7.89	12.82	-1.309	7.96195e-05								No	No
Zfp949	9.78	5.32	4.35	8.69	5.28	2.72	1.21	2.26	-1.309	0.0149293								No	No
Dhx37	14.67	16.84	16.51	21	7.03	10.86	6.07	3.02	-1.306	0.00010228								Dhx37	No
Orc2	159.75	138.22	137.31	156.38	52.76	59.75	60.66	36.2	-1.305	5.40278e-25								Orc2	No
Itpa	90.47	80.63	112.98	78.19	27.26	22.63	37	40.72	-1.305	1.32158e-13								No	No
Polr1b	20.38	29.24	16.51	23.89	8.79	10.86	7.28	6.79	-1.304	1.18504e-05								Polr1b	No
Sfmbt1	48.9	32.78	45.19	38.37	8.79	16.29	17.59	16.59	-1.303	5.47659e-09								No	No
Trmt61a	43.2	40.76	39.11	28.96	9.67	14.48	15.17	15.84	-1.301	1.07425e-08								Trmt61a	No
Med31	24.45	25.7	20.86	24.62	10.55	10.86	7.89	6.79	-1.301	3.47092e-07								Med31	No
Cdca4	138.56	100.12	125.15	141.9	38.69	46.17	50.96	53.54	-1.3	1.98303e-21								No	No
Trip13	119	126.71	108.63	138.28	38.69	39.83	49.74	52.79	-1.299	5.14317e-23								No	No
Glrb	4.89	8.86	6.08	10.86	6.16	1.81	3.64	0.75	-1.298	0.0166538								No	No
Ss18l2	35.86	30.13	30.42	50.68	10.55	9.96	13.35	21.87	-1.297	2.65986e-06								No	No
Ncoa3	22.82	28.35	16.51	12.31	4.4	5.43	7.89	10.56	-1.297	0.000402584								No	No
Pnn	216.81	246.32	208.58	194.75	74.74	81.47	83.71	76.92	-1.296	2.81592e-36								No	No
Gtpbp6	36.68	43.42	44.32	57.19	14.07	13.58	20.62	17.34	-1.296	3.63184e-09								No	No
Dvl1	46.46	30.13	41.72	44.89	20.22	13.58	16.99	6.03	-1.296	2.96669e-07								No	No
Dcps	78.25	53.16	81.69	62.99	24.62	25.35	30.33	21.87	-1.293	2.94973e-12								No	No
Necap2	63.58	77.97	60.84	62.26	18.47	47.07	29.72	17.34	-1.293	1.45818e-09								No	No
Zfp113	26.08	21.27	17.38	20.27	8.79	7.24	5.46	10.56	-1.293	9.55485e-06								No	No
Polrmt	44.01	20.38	21.73	17.38	7.03	8.15	12.74	5.28	-1.293	0.000360048								No	No
Stx1a	8.15	14.18	5.21	10.14	6.16	4.53	1.82	2.26	-1.291	0.00913528								No	No
Pycr2	206.21	232.15	198.15	215.02	89.69	61.56	83.71	77.67	-1.288	1.00205e-34								No	No
Tap2	18.75	19.49	6.95	18.1	9.67	6.34	4.85	4.52	-1.288	0.000795907								Tap2	No
Rbl1	46.46	38.1	44.32	47.06	21.1	11.77	17.59	15.08	-1.287	5.19901e-11								No	No
Yrdc	37.49	44.3	56.49	42.71	19.35	19.01	12.13	18.1	-1.286	3.96013e-09								No	No
Ankrd24	23.64	38.1	26.07	34.75	10.55	9.05	13.35	12.07	-1.285	6.86444e-07								No	No
Mphosph9	27.71	31.01	13.04	23.17	8.79	9.05	10.92	7.54	-1.284	3.01158e-05								No	No
Ccnk	58.69	44.3	70.4	52.85	23.74	19.92	19.41	21.12	-1.283	3.9756e-11								No	No
Hsdl1	28.53	15.95	16.51	24.62	15.83	5.43	10.31	3.77	-1.283	0.000573291								No	No
Madd	7.34	13.29	5.21	5.79	1.76	2.72	3.03	3.02	-1.283	0.0125496								No	No
Dtl	98.62	116.07	105.16	104.25	31.66	38.92	44.89	41.48	-1.281	6.53186e-23								Dtl	No
Riox1	50.53	52.28	52.14	55.02	23.74	36.21	16.99	12.82	-1.281	1.26821e-09								No	No
Ssx2ip	39.94	46.07	38.24	36.2	19.35	11.77	12.13	17.34	-1.28	1.86327e-09								No	No
Gbp2	28.53	46.07	48.67	45.61	10.55	18.1	17.59	18.1	-1.28	2.46282e-08								Gbp2	No
Vps37d	11.41	13.29	6.95	1.45	4.4	5.43	1.82	1.51	-1.28	0.043717								No	No
Tada2b	17.12	23.04	13.91	9.41	4.4	7.24	3.03	9.05	-1.277	0.00198019								No	No
Taf1a	26.9	12.4	12.17	15.93	0.88	4.53	7.28	9.05	-1.277	0.00245227								No	No
Zscan26	4.89	7.97	6.08	7.96	2.64	0.91	2.43	3.77	-1.277	0.00844179								No	No
Mtm1	4.08	5.32	7.82	5.79	6.16	2.72	1.82	0	-1.276	0.0352313								No	No
Acot8	31.79	31.9	27.81	22.44	14.95	9.05	3.64	12.82	-1.275	2.09027e-05								No	No
Rif1	542.02	571.51	519.71	529.23	195.21	218.16	211.1	191.55	-1.274	3.2095e-78								No	No
Rfc4	47.27	44.3	53.01	54.3	20.22	17.2	16.38	21.87	-1.274	2.6422e-12								No	No
Polr3b	42.38	41.64	59.97	42.71	13.19	20.82	13.35	22.62	-1.271	1.28798e-08								No	No
Cdca7	61.13	54.94	66.05	47.06	22.86	28.97	18.81	18.1	-1.27	5.67942e-11								No	No
Pdzd8	208.66	172.78	205.1	205.61	68.59	79.66	73.4	79.94	-1.269	9.41369e-37								No	No
Prim2	42.38	50.51	56.49	47.78	14.07	17.2	27.9	17.34	-1.269	1.67962e-09								Prim2	No
Surf2	26.9	32.78	26.07	34.75	6.16	12.67	10.31	16.59	-1.269	9.60707e-07								No	No
Trim30a	167.09	157.72	142.53	145.52	66.83	62.46	52.17	53.54	-1.267	1.86951e-28								No	No
Pign	53.79	55.82	58.23	39.09	17.59	19.92	21.23	19.61	-1.267	8.62588e-11								No	No
Vps37b	33.42	42.53	33.89	27.51	10.55	16.29	9.71	15.84	-1.267	2.68189e-07								No	No
Mcm2	256.75	204.68	223.35	204.16	72.99	86	89.17	83.71	-1.266	1.31123e-34								No	No
Mapk8ip1	12.23	11.52	10.43	12.31	0.88	4.53	5.46	5.28	-1.264	0.000590713								No	No
Sgtb	14.67	14.18	13.91	15.93	5.28	6.34	5.46	5.28	-1.262	7.44269e-05								No	No
1810032O08Rik	8.97	9.75	6.08	7.96	3.52	3.62	3.64	1.51	-1.261	0.00350074								No	No
Ifi35	54.61	67.34	46.06	68.05	18.47	25.35	33.97	15.84	-1.26	2.5706e-08								No	No
Gprasp1	31.79	28.35	35.63	23.89	12.31	5.43	13.95	11.31	-1.259	1.1579e-06								No	No
Irgm1	23.64	16.84	22.6	20.27	7.91	7.24	13.95	3.77	-1.259	0.000116157								No	No
Cdv3	385.53	359.74	346.76	372.13	143.33	144.84	146.19	125.18	-1.258	1.60985e-59								No	No
Pick1	13.86	15.06	21.73	5.79	4.4	9.96	3.64	5.28	-1.258	0.0059848								No	No
Anxa3	584.41	525.43	590.97	584.98	228.63	224.5	205.64	218.69	-1.257	2.51691e-76								No	No
Igf2bp3	98.62	89.49	97.34	73.85	32.54	24.44	35.18	42.23	-1.257	4.77775e-15								No	No
AC163282.1	4.89	10.63	3.48	9.41	3.52	2.72	3.64	0.75	-1.257	0.026514								No	No
Slbp	30.16	24.81	24.33	19.55	7.03	11.77	12.13	6.03	-1.256	8.94157e-06								No	No
Tmem218	8.15	17.72	10.43	10.14	2.64	6.34	5.46	2.26	-1.256	0.00378668								No	No
Pom121	65.21	56.71	54.75	59.37	17.59	31.68	22.44	21.87	-1.255	4.73218e-13								No	No
Smpd4	13.04	21.27	16.51	18.1	8.79	4.53	4.85	8.3	-1.255	0.000124178								No	No
Usp30	16.3	17.72	14.77	12.31	12.31	5.43	6.07	3.02	-1.255	0.000498734								No	No
Esyt1	126.34	129.36	146.87	125.25	60.67	45.26	53.99	42.98	-1.254	5.65876e-24								No	No
Ikbkap	107.59	117.85	104.29	141.18	32.54	56.12	47.92	42.23	-1.253	2.96966e-16								No	No
Atf6	61.13	56.71	49.54	58.64	27.26	17.2	19.41	23.38	-1.251	9.86802e-13								No	No
Lrrc17	406.72	373.92	368.49	377.92	167.95	137.59	135.28	154.59	-1.25	2.56436e-54								No	No
Ints11	52.16	38.99	53.88	31.13	18.47	14.48	18.2	16.59	-1.25	6.48962e-08								No	No
Gramd1b	13.04	13.29	23.47	25.34	7.91	4.53	9.71	6.03	-1.25	0.000521823								No	No
Zfp428	83.14	72.66	91.25	90.5	24.62	36.21	48.53	27.15	-1.249	9.62767e-13								No	No
Zfp655	57.06	45.19	48.67	60.09	4.4	21.73	20.02	25.64	-1.249	1.0613e-08								No	No
Cryzl1	151.6	118.73	107.77	120.18	42.21	48.88	53.99	41.48	-1.248	2.92933e-19								No	No
Pask	8.15	9.75	9.56	10.14	3.52	4.53	0.61	5.28	-1.248	0.00418212								No	No
Ppil4	225.78	232.15	252.03	210.68	75.62	114.96	99.48	59.58	-1.246	1.34523e-22								Ppil4	No
Iqcb1	17.12	36.33	34.76	29.68	7.03	9.96	12.13	18.1	-1.246	4.37032e-05								No	No
Fam185a	15.49	9.75	11.3	13.76	6.16	1.81	3.64	8.3	-1.245	0.00144627								No	No
Lgmn	29.34	19.49	32.16	28.24	7.91	10.86	11.53	11.31	-1.244	1.15214e-06								Lgmn	No
Vkorc1l1	4.89	10.63	7.82	7.24	0.88	4.53	2.43	3.77	-1.242	0.0109231								No	No
Tcf19	72.54	77.97	79.09	74.57	23.74	34.4	30.94	27.9	-1.241	4.50327e-18								No	No
Prim1	110.04	116.07	125.15	128.87	52.76	49.79	45.5	39.21	-1.24	2.972e-23								Prim1	No
Cebpg	132.86	143.54	108.63	149.86	58.04	43.45	43.68	71.64	-1.24	1.64006e-15								No	No
Tmx2	102.7	114.3	78.22	123.08	43.09	40.74	47.32	33.94	-1.24	1.01184e-14								No	No
Scamp5	10.6	4.43	9.56	6.52	0	2.72	4.85	3.02	-1.24	0.0180102								No	No
Hinfp	42.38	37.21	41.72	27.51	9.67	17.2	18.81	10.56	-1.239	7.21992e-07								No	No
Dis3	222.52	259.61	246.82	245.43	90.57	113.15	97.06	82.2	-1.238	1.57816e-35								No	No
Rabggtb	137.75	143.54	147.74	148.42	43.09	75.13	51.56	62.59	-1.238	4.39718e-24								No	No
Cpsf3	95.36	96.58	118.19	103.53	36.93	42.55	44.89	34.69	-1.238	8.3678e-20								No	No
Rufy3	20.38	31.9	28.68	32.58	7.03	8.15	12.13	17.34	-1.238	1.42471e-05								No	No
Entpd5	8.15	13.29	15.64	18.82	2.64	3.62	6.07	9.8	-1.238	0.00309382								No	No
Foxj3	44.01	42.53	31.29	45.61	16.71	15.39	19.41	11.31	-1.236	1.86808e-08								No	No
Ttc17	27.71	34.56	21.73	27.51	13.19	11.77	11.53	6.79	-1.236	2.55904e-06								No	No
Rflnb	22.82	31.01	24.33	18.1	7.03	9.05	9.1	11.31	-1.236	1.32423e-05								No	No
Itfg2	18.75	23.04	20.86	31.86	11.43	9.05	6.07	10.56	-1.235	4.30568e-05								No	No
Sumf2	22.82	19.49	16.51	13.03	8.79	4.53	8.49	5.28	-1.235	0.000176194								No	No
Pcnx4	9.78	16.84	10.43	19.55	5.28	3.62	4.25	10.56	-1.235	0.00318402								No	No
Sars	1048.19	1112.89	1088.09	1056.29	420.32	450.8	404.61	400.44	-1.234	2.44647e-107								No	No
Taf15	125.52	108.1	108.63	129.59	52.76	38.92	40.04	52.79	-1.234	2.56835e-20								Taf15	No
Trub2	72.54	75.31	46.93	64.43	31.66	26.25	21.84	24.13	-1.233	1.12324e-10								No	No
Ralgapa2	13.04	21.27	23.47	21	7.91	5.43	9.1	7.54	-1.233	6.20741e-05								No	No
Rab10os	6.52	20.38	5.21	4.34	2.64	3.62	1.82	2.26	-1.233	0.0426111								No	No
Inip	53.79	44.3	52.14	48.51	23.74	13.58	24.87	12.82	-1.232	1.95463e-09								No	No
Selenoh	185.02	180.76	183.38	171.58	58.92	60.65	94.63	74.66	-1.231	5.29923e-27								No	No
Hdac8	26.9	27.47	16.51	25.34	6.16	12.67	12.74	5.28	-1.231	7.0675e-05								No	No
Rpap2	20.38	8.86	20.86	22.44	6.16	1.81	10.31	8.3	-1.231	0.00123699								No	No
Mad1l1	71.73	43.42	48.67	51.4	14.95	26.25	13.35	37.71	-1.23	4.999e-06								No	No
Mettl22	13.86	7.09	5.21	8.69	1.76	4.53	3.03	3.77	-1.229	0.0107545								No	No
Trmt6	125.52	138.22	158.17	133.21	74.74	62.46	47.92	44.49	-1.228	9.37827e-18								No	No
Pcgf6	25.27	27.47	33.02	28.24	12.31	25.35	6.67	10.56	-1.227	1.86894e-05								No	No
Ddx20	37.49	34.56	42.58	40.54	12.31	12.67	15.17	19.61	-1.226	1.80761e-09								No	No
Epha2	9.78	8.86	6.08	7.24	1.76	1.81	3.64	4.52	-1.226	0.00565722								No	No
Dhx32	7.34	4.43	13.91	11.58	2.64	2.72	4.25	4.52	-1.226	0.00994713								No	No
Dusp3	98.62	110.76	73.87	102.81	44.85	39.83	39.43	29.41	-1.225	3.64086e-14								No	No
Dhx33	57.06	31.9	34.76	47.06	11.43	6.34	20.62	23.38	-1.225	2.2446e-05								No	No
Tuba4a	66.84	55.82	41.72	65.88	10.55	25.35	29.72	19.61	-1.224	1.16019e-07								No	No
Zfp609	70.91	83.29	61.7	74.57	36.93	26.25	28.51	24.13	-1.223	4.22948e-13								No	No
Mrto4	117.37	99.24	118.19	128.87	49.24	38.92	50.96	41.48	-1.222	1.75513e-20								No	No
Samd4	97.81	93.04	102.55	115.84	38.69	47.07	43.07	26.39	-1.222	2.76655e-16								No	No
Dhrs13	20.38	28.35	24.33	25.34	7.91	9.96	9.71	10.56	-1.22	1.3996e-06								No	No
Fkbp3	327.66	300.37	294.62	312.76	114.31	130.35	110.4	132.72	-1.218	3.7549e-48								No	No
Ddx21	949.56	953.4	869.95	949.86	374.6	381.1	362.15	347.65	-1.217	2.72374e-95								No	No
Rsl24d1	62.76	71.77	69.53	68.05	23.74	23.54	25.48	34.69	-1.216	1.28304e-14								Rsl24d1	No
Pmf1	304.84	255.18	251.16	265.7	94.97	133.97	103.12	104.82	-1.214	7.64386e-34								No	No
Psmd9	65.21	64.68	63.44	62.99	36.93	22.63	24.26	23.38	-1.214	9.01486e-14								No	No
Pus1	30.97	30.13	26.94	21	8.79	14.48	4.25	13.57	-1.213	5.5159e-05								Pus1	No
Tdp2	21.19	25.7	25.2	12.31	4.4	4.53	10.92	12.07	-1.212	0.000795024								No	No
Cped1	14.67	23.04	16.51	18.1	6.16	14.48	7.89	3.77	-1.211	0.00046139								No	No
Tmcc3	13.86	13.29	21.73	10.86	2.64	5.43	5.46	11.31	-1.211	0.00282917								No	No
Arhgdig	4.89	7.97	9.56	3.62	0.88	1.81	3.03	3.77	-1.211	0.0301116								No	No
Pus3	46.46	48.73	38.24	47.06	19.35	13.58	20.02	17.34	-1.21	1.97898e-10								No	No
Siah2	20.38	31.9	21.73	32.58	9.67	7.24	10.31	14.33	-1.21	2.16235e-05								No	No
Pwwp2a	65.21	36.33	48.67	58.64	25.5	20.82	16.99	21.87	-1.209	2.48478e-08								No	No
Tube1	12.23	6.2	10.43	10.14	1.76	4.53	4.25	4.52	-1.208	0.00317865								No	No
Zfp101	18.75	17.72	9.56	25.34	7.91	4.53	12.74	4.52	-1.204	0.00289908								No	No
Erh	48.9	42.53	38.24	39.09	16.71	17.2	15.77	17.34	-1.203	5.71457e-10								No	No
Nol8	237.19	217.08	218.14	270.04	95.85	93.24	75.83	104.07	-1.201	1.70433e-27								No	No
Fam136a	28.53	23.92	36.5	29.68	15.83	18.1	7.89	8.3	-1.201	1.96797e-05								No	No
Casp7	17.93	13.29	8.69	14.48	6.16	7.24	4.85	3.77	-1.201	0.00108627								No	No
Tsr2	49.72	37.21	55.62	37.65	21.1	17.2	20.02	12.82	-1.2	6.04949e-08								No	No
Hyou1	26.08	33.67	27.81	15.93	10.55	11.77	9.1	10.56	-1.2	3.58387e-05								No	No
Flrt2	36.68	34.56	42.58	52.13	21.1	11.77	14.56	18.85	-1.197	1.60289e-07								No	No
Rce1	20.38	24.81	13.91	20.27	7.91	6.34	7.28	9.8	-1.197	6.90224e-05								No	No
Wdr62	17.93	12.4	26.07	15.93	6.16	7.24	6.07	8.3	-1.197	0.000352114								No	No
Slfn8	17.93	12.4	19.12	21.72	10.55	9.96	2.43	5.28	-1.197	0.00136471								No	No
Smox	13.04	10.63	9.56	13.03	5.28	2.72	5.46	4.52	-1.196	0.000846733								No	No
Cdc42ep3	117.37	102.78	122.54	84.71	39.57	45.26	50.35	35.44	-1.195	1.02918e-14								No	No
Rcc1l	25.27	38.1	39.98	22.44	9.67	10.86	20.62	10.56	-1.195	9.40623e-05								No	No
Ermp1	30.97	31.01	44.32	34.75	18.47	13.58	14.56	9.8	-1.194	4.35943e-07								Ermp1	No
Srm	351.3	336.7	338.94	327.24	140.69	127.64	149.23	117.64	-1.193	3.1054e-49								No	No
Rheb	98.62	105.44	106.03	89.05	32.54	43.45	38.82	43.74	-1.193	3.53645e-19								No	No
Gm340	14.67	12.4	12.17	19.55	8.79	0.91	6.07	6.03	-1.192	0.00144047								No	No
Snx30	46.46	50.51	51.28	39.09	19.35	20.82	11.53	21.87	-1.191	1.71468e-08								No	No
Gabpb1	35.05	32.78	33.02	36.92	13.19	14.48	9.1	20.36	-1.191	3.56967e-07								No	No
Primpol	15.49	9.75	22.6	8.69	4.4	7.24	4.25	5.28	-1.191	0.00463424								No	No
Ddx54	105.14	94.81	89.52	77.47	33.41	35.3	46.71	30.92	-1.19	7.18494e-14								Ddx54	No
Spata5	25.27	34.56	17.38	24.62	8.79	11.77	11.53	7.54	-1.189	4.5738e-05								No	No
Cyb5r1	330.92	311.89	326.77	351.13	128.38	141.22	141.95	116.89	-1.188	1.24081e-47								No	No
Mthfr	13.04	7.09	11.3	10.86	3.52	1.81	4.25	7.54	-1.188	0.00422126								No	No
Rsrp1	78.25	85.06	64.31	74.57	30.78	27.16	30.33	32.43	-1.187	6.92628e-15								No	No
Aldh18a1	52.16	61.14	71.26	53.57	25.5	20.82	26.08	21.87	-1.187	3.4911e-11								No	No
Oxnad1	27.71	27.47	21.73	21	7.91	7.24	12.74	9.8	-1.187	7.45299e-06								No	No
Rbm39	1536.42	1597.56	1589.54	1718.01	647.19	631.85	590.24	706.61	-1.185	7.52502e-81								No	No
Adamts1	161.38	159.49	211.19	204.16	68.59	71.51	69.15	86.72	-1.185	3.41155e-21								No	No
Kitl	96.99	98.35	92.99	110.05	43.09	20.82	46.1	38.46	-1.185	1.54588e-15								No	No
Nup160	34.23	27.47	35.63	31.13	15.83	19.92	10.92	7.54	-1.185	2.76951e-06								No	No
Spen	109.22	93.92	91.25	120.9	34.29	30.78	50.96	47.51	-1.184	6.85043e-14								No	No
Chka	60.32	77.97	79.09	68.05	28.14	19.01	33.36	30.16	-1.183	5.6135e-12								No	No
Wdtc1	16.3	28.35	33.02	19.55	8.79	10.86	13.35	4.52	-1.182	0.000535907								No	No
Ptpn4	11.41	9.75	11.3	6.52	5.28	3.62	4.25	2.26	-1.18	0.00444615								No	No
Lrrfip2	113.3	94.81	94.73	113.66	38.69	39.83	55.2	36.95	-1.179	7.90722e-16								No	No
Taf3	85.58	78.86	75.61	91.95	31.66	57.93	32.76	29.41	-1.178	4.23574e-13								No	No
Abtb2	8.97	14.18	20.86	18.1	10.55	3.62	2.43	9.05	-1.178	0.00758601								No	No
4933434E20Rik	149.16	147.97	134.71	149.14	44.85	53.41	62.48	73.15	-1.177	3.72874e-23								No	No
Fam216a	48.09	54.94	36.5	56.47	15.83	16.29	23.66	22.62	-1.177	1.46748e-08								No	No
Arhgap22	13.86	12.4	14.77	21	4.4	3.62	7.28	9.05	-1.177	0.000794625								No	No
9430015G10Rik	19.56	28.35	28.68	31.13	8.79	9.05	12.13	12.82	-1.175	6.27058e-06								No	No
Farp2	8.97	7.09	2.61	10.14	2.64	0	3.64	4.52	-1.175	0.0382574								Farp2	No
Rpa2	257.56	299.49	283.32	283.8	109.04	127.64	118.9	96.53	-1.174	2.37668e-36								No	No
Irf9	175.24	173.67	133.84	148.42	61.55	57.93	64.91	70.89	-1.174	1.43797e-22								Irf9	No
Urb2	15.49	11.52	8.69	13.76	4.4	7.24	3.64	5.28	-1.173	0.00147211								No	No
Pnkp	50.53	26.58	29.55	31.13	11.43	13.58	14.56	12.07	-1.172	5.68865e-06								No	No
Rabgap1l	25.27	31.01	25.2	23.17	13.19	8.15	13.35	6.79	-1.171	8.54403e-06								No	No
Palb2	4.08	3.54	6.08	7.24	1.76	1.81	3.03	1.51	-1.171	0.0336134								No	No
Nectin1	2.45	8.86	9.56	5.79	1.76	1.81	3.03	3.77	-1.17	0.0362029								No	No
Nop16	149.16	134.68	162.52	161.45	62.43	58.84	66.73	58.07	-1.169	1.54794e-26								No	No
Papd5	108.4	82.4	93.86	76.02	43.09	42.55	27.9	33.94	-1.169	9.50091e-12								No	No
Usp37	56.24	39.87	44.32	40.54	20.22	16.29	16.99	19.61	-1.167	6.80122e-09								No	No
Appbp2	69.28	88.61	70.4	79.64	27.26	44.36	30.94	28.66	-1.166	2.03439e-12								Appbp2	No
Sypl	81.51	104.55	107.77	104.25	24.62	31.68	47.32	53.54	-1.166	5.79324e-11								No	No
Tbrg4	71.73	82.4	77.35	98.46	39.57	27.16	23.05	44.49	-1.166	1.31927e-09								No	No
Nxt1	45.64	33.67	33.02	51.4	17.59	9.96	15.77	22.62	-1.165	2.02081e-06								No	No
Nampt	182.58	186.07	194.67	175.2	59.8	66.99	81.29	89.74	-1.162	7.74984e-28								Nampt	No
Tsfm	14.67	16.84	13.91	15.2	4.4	7.24	5.46	7.54	-1.162	0.000177007								No	No
Stard5	47.27	46.07	33.02	36.2	18.47	17.2	13.95	17.34	-1.16	6.88146e-08								No	No
Spire1	33.42	38.99	21.73	31.86	6.16	14.48	13.35	15.84	-1.16	1.47041e-05								No	No
Zfp592	20.38	20.38	19.99	25.34	5.28	11.77	10.31	7.54	-1.16	2.5537e-05								No	No
Ifit2	15.49	10.63	15.64	11.58	3.52	7.24	3.03	8.3	-1.16	0.00186973								Ifit2	No
Ppp1r8	112.48	97.47	126.89	97.01	40.45	47.07	53.38	24.89	-1.159	2.03518e-12								No	No
Exosc10	105.96	104.55	84.3	108.6	31.66	39.83	43.68	49.02	-1.158	3.98257e-16								No	No
Pycr1	70.1	107.21	85.17	99.91	38.69	47.98	27.3	36.95	-1.158	3.90216e-10								Pycr1	No
Exosc7	57.06	55.82	58.23	55.75	14.95	23.54	32.76	21.87	-1.158	4.61832e-10								No	No
Polr2h	41.57	22.15	29.55	26.06	8.79	9.05	12.13	24.89	-1.158	0.000207174								No	No
Ube2cbp	5.71	7.09	14.77	6.52	3.52	6.34	1.82	2.26	-1.158	0.030886								No	No
Xpot	128.78	107.21	153.83	131.76	41.33	56.12	59.45	54.3	-1.156	1.70221e-17								No	No
Scarb1	28.53	25.7	33.02	36.2	11.43	15.39	10.31	14.33	-1.156	9.09865e-07								Scarb1	No
Plcxd2	16.3	7.97	7.82	15.93	3.52	4.53	3.64	11.31	-1.156	0.0127283								No	No
Zfp704	64.39	62.91	58.23	68.78	27.26	22.63	21.84	44.49	-1.155	4.50402e-10								No	No
Nudt14	21.19	16.84	24.33	18.82	4.4	8.15	17.59	7.54	-1.155	0.000620211								Nudt14	No
3110009E18Rik	5.71	7.97	3.48	5.79	1.76	1.81	2.43	3.02	-1.155	0.0257626								No	No
Fkbp4	542.84	506.82	555.34	469.14	203.13	190.1	230.51	222.47	-1.154	2.40262e-51								No	No
Tab2	234.74	257.84	277.24	251.95	129.26	106.82	93.42	104.07	-1.154	1.54762e-30								No	No
Slc25a33	21.19	24.81	35.63	23.89	13.19	17.2	4.85	9.05	-1.154	0.000438793								No	No
Ncbp1	163.01	147.97	208.58	173.03	65.07	81.47	75.83	45.25	-1.153	4.3566e-16								No	No
Trim12c	57.87	40.76	38.24	43.44	21.98	25.35	12.74	15.84	-1.153	9.38164e-07								No	No
Haspin	26.9	19.49	15.64	17.38	8.79	2.72	7.89	11.31	-1.153	0.000521823								No	No
Prps2	35.86	38.99	41.72	34.75	18.47	10.86	12.13	23.38	-1.152	5.49399e-07								Prps2	No
Mcts2	28.53	31.9	45.19	30.41	10.55	20.82	12.13	13.57	-1.152	6.57289e-06								Mcts2	No
Tgfb1	8.15	7.09	13.91	18.82	3.52	5.43	6.67	3.02	-1.152	0.0111287								No	No
Eps15	60.32	38.1	66.92	52.13	26.38	17.2	25.48	21.12	-1.15	2.94687e-08								No	No
Gmeb2	22.01	19.49	19.12	25.34	4.4	11.77	10.92	7.54	-1.149	5.8142e-05								No	No
E2f7	54.61	58.48	67.79	44.89	22.86	17.2	26.08	24.89	-1.148	2.36063e-09								No	No
Nlk	67.65	75.31	45.19	35.48	22.86	22.63	21.84	24.89	-1.147	1.89531e-06								No	No
Ppm1g	180.13	165.69	170.34	165.79	63.31	78.75	63.69	77.67	-1.144	1.5703e-29								No	No
Noc3l	57.87	70.88	79.96	80.36	28.14	22.63	37	30.16	-1.141	6.88171e-11								No	No
Dgkh	51.35	44.3	39.11	44.89	16.71	18.1	17.59	21.87	-1.141	1.17366e-09								No	No
AU019823	79.06	86.83	88.65	98.46	33.41	29.87	42.46	38.46	-1.139	2.31593e-15								No	No
Etfa	38.31	59.37	40.85	44.89	21.98	23.54	15.77	14.33	-1.139	3.94337e-07								No	No
Fam45a	42.38	29.24	34.76	29.68	14.95	19.01	13.35	9.8	-1.139	2.13227e-06								No	No
Pknox1	73.36	74.43	47.8	76.02	23.74	33.49	33.36	24.89	-1.138	5.91365e-10								No	No
Tnfrsf10b	43.2	66.45	55.62	36.2	14.07	17.2	24.87	23.38	-1.138	2.32443e-06								No	No
Mid1ip1	38.31	28.35	31.29	29.68	9.67	18.1	15.17	9.8	-1.137	1.81172e-06								No	No
Qtrt2	17.93	15.95	16.51	13.76	6.16	9.96	2.43	7.54	-1.137	0.000969188								No	No
Elp6	8.97	8.86	26.94	15.2	10.55	3.62	3.03	6.79	-1.137	0.0198193								No	No
Nt5c2	25.27	46.07	26.94	39.09	14.07	17.2	15.17	9.8	-1.136	3.15729e-05								No	No
Dhx35	9.78	11.52	6.08	13.76	7.03	3.62	1.21	5.28	-1.136	0.0154904								No	No
Ptges3	404.28	318.98	355.45	423.53	174.11	165.66	129.21	154.59	-1.135	6.22307e-26								No	No
Zfp593	60.32	64.68	68.66	53.57	29.9	28.06	25.48	19.61	-1.135	4.60133e-11								No	No
Rnmt	105.14	91.26	76.48	79.64	56.28	31.68	41.25	27.9	-1.134	5.16861e-10								No	No
Fryl	19.56	24.81	27.81	20.27	6.16	9.05	20.02	8.3	-1.134	0.000426513								No	No
D8Ertd738e	387.16	406.7	388.48	378.64	141.57	144.84	200.79	174.2	-1.133	6.49298e-39								No	No
Tfam	103.51	99.24	100.81	88.33	46.61	26.25	45.5	37.71	-1.133	2.41813e-15								No	No
Mettl2	39.12	46.96	26.94	48.51	10.55	18.1	28.51	15.08	-1.133	4.10826e-05								No	No
Bcorl1	46.46	38.99	39.98	39.82	21.98	8.15	16.99	18.1	-1.132	6.7692e-08								No	No
Trmt10a	80.69	89.49	95.6	81.81	41.33	40.74	35.18	24.89	-1.131	1.1133e-13								No	No
Impdh2	157.31	153.29	161.65	162.17	65.95	55.22	64.91	84.46	-1.13	4.74179e-25								No	No
Nploc4	76.62	81.52	62.57	68.78	37.81	19.01	33.36	27.15	-1.13	1.15542e-10								No	No
Zbtb21	30.16	14.18	39.11	26.79	9.67	7.24	19.41	12.07	-1.129	0.000853627								No	No
2700097O09Rik	9.78	9.75	14.77	17.38	7.03	5.43	6.67	1.51	-1.129	0.00551813								No	No
Nol9	61.13	68.23	54.75	51.4	14.95	25.35	23.66	37.71	-1.128	4.19201e-08								No	No
Txnl4a	112.48	120.5	126.02	119.46	51.88	55.22	42.46	52.79	-1.127	2.12468e-21								Txnl4a	No
Micu1	96.18	96.58	108.63	97.74	58.04	44.36	34.58	40.72	-1.127	3.07797e-15								No	No
Zbp1	16.3	24.81	21.73	16.65	6.16	6.34	10.31	9.05	-1.126	0.000183129								No	No
Arhgap12	60.32	51.39	58.23	55.02	18.47	25.35	20.62	32.43	-1.125	2.88477e-10								No	No
Abhd17b	110.85	123.16	111.24	102.81	51	46.17	47.32	42.98	-1.124	4.66473e-20								Abhd17b	No
Echdc2	61.95	46.96	49.54	54.3	24.62	20.82	26.69	14.33	-1.124	6.34201e-09								Echdc2	No
Zmym1	60.32	51.39	59.97	29.68	19.35	23.54	17.59	27.9	-1.124	1.65101e-06								No	No
Timm13	186.65	176.33	185.11	154.21	74.74	76.94	69.76	73.9	-1.123	9.80492e-27								No	No
Timm22	88.03	86.83	99.94	94.84	38.69	45.26	37.61	34.69	-1.123	1.44055e-17								No	No
Tomm5	17.12	7.97	15.64	18.1	7.03	5.43	3.03	11.31	-1.123	0.00646066								No	No
Pola1	302.39	293.29	223.35	263.53	123.11	109.53	120.11	109.35	-1.122	9.13473e-29								No	No
Hspa4	676.51	690.24	693.52	651.58	286.66	284.24	279.65	288.83	-1.12	2.22776e-86								No	No
Tti2	17.93	7.09	19.99	21.72	9.67	1.81	9.71	6.03	-1.12	0.00586292								No	No
Upf2	96.18	101.9	107.77	110.05	43.09	50.69	46.1	33.18	-1.118	4.87029e-17								No	No
Fancm	43.2	56.71	46.06	51.4	26.38	26.25	15.77	16.59	-1.118	6.35536e-08								No	No
Ddah1	96.99	98.35	121.67	103.53	50.12	28.97	44.28	47.51	-1.117	8.26852e-15								No	No
Dym	41.57	30.13	28.68	26.79	16.71	24.44	10.31	9.05	-1.115	0.000106723								No	No
Acvr2a	33.42	9.75	15.64	22.44	11.43	6.34	7.89	6.79	-1.115	0.00428589								No	No
Aftph	123.08	124.05	105.16	104.25	46.61	37.11	54.6	50.53	-1.114	2.38861e-17								No	No
1700021F05Rik	43.2	50.51	36.5	35.48	9.67	21.73	17.59	18.85	-1.114	7.08538e-07								No	No
Zfp346	17.12	19.49	21.73	22.44	7.03	9.05	6.07	13.57	-1.114	0.000187317								No	No
Coq4	16.3	23.92	7.82	24.62	10.55	5.43	8.49	7.54	-1.114	0.00264904								No	No
Mlxip	13.86	8.86	13.91	7.96	3.52	7.24	3.03	5.28	-1.114	0.00633114								No	No
Slf2	92.1	135.57	93.86	79.64	40.45	51.6	36.4	33.94	-1.113	4.44485e-10								No	No
Prps1	176.87	210.88	201.63	188.24	74.74	81.47	85.53	85.22	-1.11	3.98896e-29								No	No
2510002D24Rik	15.49	7.09	14.77	16.65	4.4	3.62	10.31	5.28	-1.11	0.00673037								No	No
Nepro	17.12	22.15	21.73	30.41	10.55	9.05	7.89	11.31	-1.109	0.000140546								No	No
Tmem268	12.23	6.2	12.17	23.17	5.28	3.62	4.85	6.79	-1.109	0.012932								No	No
Dph6	72.54	57.59	59.1	62.26	21.98	34.4	20.02	31.67	-1.108	1.33282e-09								Dph6	No
AU040320	17.12	30.13	25.2	34.03	17.59	9.96	12.74	5.28	-1.108	0.000740774								No	No
Zfp932	8.97	7.97	10.43	12.31	1.76	2.72	4.85	6.79	-1.108	0.00685051								No	No
Dcun1d4	9.78	10.63	8.69	11.58	7.03	6.34	1.21	3.02	-1.108	0.0105773								No	No
Rcc2	217.62	239.24	235.52	211.4	117.83	103.2	88.57	85.97	-1.107	1.24621e-26								No	No
Eml4	79.88	81.52	79.09	79.64	25.5	40.74	28.51	44.49	-1.106	1.43542e-12								No	No
Osgin2	14.67	20.38	21.73	18.82	7.03	8.15	11.53	4.52	-1.105	0.000418933								No	No
Dync1h1	468.67	432.4	457.13	485.79	207.52	190.1	193.51	194.56	-1.104	1.42761e-57								No	No
Btaf1	91.29	107.21	108.63	99.19	41.33	48.88	36.4	47.51	-1.104	2.23301e-16								No	No
Wdr92	18.75	20.38	13.91	24.62	8.79	12.67	4.85	8.3	-1.104	0.000791002								No	No
Ppp1r2	72.54	81.52	92.99	73.85	29.02	32.59	40.64	31.67	-1.103	8.15386e-13								No	No
Adipor2	60.32	48.73	52.14	62.99	17.59	26.25	21.23	32.43	-1.103	5.66574e-09								No	No
B230307C23Rik	8.15	8.86	10.43	12.31	5.28	4.53	4.85	2.26	-1.102	0.0050845								No	No
Zbtb2	16.3	10.63	30.42	12.31	8.79	1.81	6.67	7.54	-1.101	0.00931841								No	No
Gdpd1	70.1	73.54	79.96	57.92	27.26	35.3	33.97	19.61	-1.099	1.44883e-09								No	No
Taf6	43.2	38.99	44.32	31.13	13.19	18.1	16.99	18.1	-1.099	1.87791e-07								No	No
Gm32856	7.34	10.63	4.35	12.31	6.16	3.62	2.43	3.02	-1.099	0.0247187								No	No
Fmc1	82.32	54.94	105.16	75.29	25.5	30.78	42.46	33.18	-1.098	3.51728e-08								No	No
Mbd6	30.97	19.49	23.47	23.17	10.55	10.86	11.53	8.3	-1.097	3.25682e-05								No	No
Urb1	5.71	7.09	13.04	4.34	1.76	3.62	3.03	3.02	-1.097	0.0396234								No	No
Strap	277.13	251.64	252.9	283.08	134.54	113.15	101.91	116.89	-1.095	2.54907e-31								No	No
Mettl16	159.75	172.78	179.9	176.65	72.11	68.8	79.47	72.4	-1.094	1.0793e-28								No	No
Ccdc107	44.83	62.91	46.93	54.3	21.98	25.35	21.84	20.36	-1.094	5.50877e-09								No	No
2410131K14Rik	20.38	15.06	19.12	15.93	8.79	9.05	6.07	6.79	-1.094	0.000183067								No	No
Cluh	155.68	123.16	139.05	111.49	51.88	43.45	77.65	58.82	-1.093	1.56254e-12								No	No
Cdc7	30.16	17.72	22.6	11.58	7.91	6.34	9.71	9.8	-1.093	0.00175164								No	No
Carm1	108.4	107.21	94.73	107.15	35.17	44.36	49.14	48.26	-1.092	2.69555e-18								No	No
Pold2	60.32	77.97	61.7	72.4	29.9	33.49	29.72	24.13	-1.091	4.21374e-11								No	No
Llph	66.84	76.2	84.3	91.22	35.17	26.25	43.07	30.92	-1.09	1.00017e-10								No	No
Tpst2	73.36	54.05	59.1	54.3	27.26	19.92	27.9	26.39	-1.09	6.93567e-10								Tpst2	No
Ier2	93.73	52.28	77.35	76.02	18.47	38.02	30.33	39.97	-1.089	1.0832e-07								No	No
Ghitm	367.6	350.88	423.24	388.05	190.82	156.6	165.61	153.84	-1.088	2.84501e-36								No	No
Morc3	57.87	50.51	66.05	79.64	27.26	27.16	26.08	27.15	-1.088	3.20995e-09								Morc3	No
Wwc1	31.79	38.1	43.45	38.37	21.1	19.01	8.49	15.08	-1.088	7.292e-06								No	No
Atxn7l1	17.12	22.15	19.99	29.68	10.55	6.34	12.13	8.3	-1.088	0.000290256								No	No
Pnpla2	18.75	20.38	15.64	13.76	7.91	2.72	13.95	6.03	-1.088	0.00318869								No	No
Sbno1	511.05	443.03	483.21	450.32	195.21	218.16	212.92	184.76	-1.087	7.41195e-48								Sbno1	No
Sf1	225.78	172.78	195.54	191.13	88.81	83.28	69.76	93.51	-1.087	1.48728e-21								No	No
Dctpp1	121.45	138.22	135.58	151.31	65.95	64.27	56.42	50.53	-1.087	5.62775e-19								Dctpp1	No
Tsr3	108.4	86.83	99.07	89.05	23.74	40.74	44.28	46.76	-1.087	3.35522e-13								No	No
Suz12	312.99	291.51	268.55	288.14	134.54	124.92	128	113.12	-1.085	5.63777e-37								Suz12	No
Tlk1	110.85	117.85	126.02	87.6	64.19	42.55	43.07	49.77	-1.085	3.60073e-12								No	No
Xrcc6	74.17	65.57	65.18	60.81	35.17	12.67	33.97	23.38	-1.085	1.148e-08								No	No
Ensa	27.71	30.13	27.81	16.65	9.67	10.86	12.74	10.56	-1.085	6.9842e-05								No	No
Ets2	224.15	252.53	232.04	270.04	104.64	104.1	117.68	94.26	-1.083	2.50307e-28								No	No
Prdm4	14.67	27.47	19.99	25.34	4.4	9.96	12.13	9.8	-1.083	0.000672067								No	No
Ubtf	166.28	185.19	188.59	154.21	87.05	75.13	71.58	67.87	-1.082	1.23504e-21								No	No
Pin1	118.19	139.11	123.41	141.9	55.4	50.69	52.17	74.66	-1.081	1.35677e-16								No	No
Zfp942	20.38	28.35	25.2	24.62	8.79	16.29	12.13	6.03	-1.081	0.000116151								No	No
Med26	20.38	12.4	24.33	13.03	4.4	9.05	6.07	10.56	-1.081	0.00265278								No	No
Gtpbp8	17.12	28.35	36.5	18.82	7.91	9.96	10.92	12.07	-1.08	0.000641196								No	No
Prpsap2	22.82	10.63	15.64	16.65	5.28	9.96	7.89	5.28	-1.08	0.00182519								No	No
Eif2s1	178.5	199.36	194.67	192.58	80.02	67.89	90.39	87.48	-1.079	6.26155e-28								No	No
Cdyl	44.83	28.35	24.33	39.09	12.31	19.01	15.17	12.82	-1.079	3.37427e-05								No	No
Prelid2	23.64	19.49	33.89	20.27	8.79	3.62	13.35	12.07	-1.078	0.000651218								No	No
Tnrc6c	53.79	48.73	50.41	65.88	22.86	19.92	25.48	25.64	-1.077	2.30125e-09								No	No
Mboat1	9.78	15.95	14.77	8.69	3.52	8.15	3.03	6.79	-1.076	0.0086989								No	No
Exosc3	12.23	7.97	6.08	3.62	1.76	2.72	3.03	4.52	-1.076	0.0464445								No	No
Snx5	229.85	248.98	253.77	230.95	75.62	126.73	104.34	107.08	-1.075	1.18353e-25								No	No
Chaf1a	134.49	122.28	113.85	144.8	58.04	59.75	52.17	55.8	-1.074	8.72457e-19								Chaf1a	No
Fam126a	55.43	54.05	43.45	67.33	25.5	18.1	24.26	27.15	-1.074	2.8913e-08								No	No
Gatad2b	334.18	304.8	292.01	320	115.19	154.79	133.46	142.53	-1.073	5.20184e-36								No	No
Peli2	19.56	20.38	17.38	15.93	8.79	6.34	6.07	10.56	-1.073	0.000220435								No	No
Bri3	17.93	23.04	23.47	17.38	8.79	7.24	12.13	6.03	-1.073	0.000267018								No	No
Npat	102.7	116.07	115.59	124.52	43.09	55.22	46.1	55.8	-1.072	1.3405e-17								No	No
Iigp1	70.91	63.8	86.04	82.53	35.17	28.06	40.64	26.39	-1.072	2.05537e-10								Iigp1	No
Mier3	85.58	77.09	76.48	68.78	36.05	29.87	32.76	34.69	-1.071	9.27615e-14								No	No
Mios	28.53	26.58	15.64	22.44	11.43	16.29	8.49	6.79	-1.071	0.000596069								No	No
Traf2	35.05	20.38	24.33	37.65	5.28	8.15	16.38	18.85	-1.071	0.00101047								No	No
Mcm3	504.53	496.19	448.44	517.65	200.49	231.74	203.22	223.97	-1.07	8.40738e-48								No	No
H2afz	382.27	381	366.75	409.05	164.44	167.47	185.62	135.74	-1.07	2.03488e-37								No	No
Mis12	60.32	76.2	62.57	70.95	35.17	47.07	23.05	24.13	-1.07	5.09579e-08								No	No
Mthfd2	638.2	569.73	571.85	605.25	261.16	281.53	237.19	261.68	-1.069	8.30349e-53								No	No
Sco1	27.71	31.9	36.5	36.2	14.07	18.1	15.17	10.56	-1.069	1.80618e-06								No	No
Limk1	16.3	13.29	10.43	16.65	2.64	2.72	8.49	10.56	-1.069	0.00688113								No	No
Prkci	57.87	35.44	53.01	39.09	16.71	21.73	18.81	23.38	-1.067	9.90459e-07								Prkci	No
Srsf9	249.41	255.18	296.36	234.57	109.04	115.87	95.24	125.94	-1.065	7.78502e-25								No	No
Lrrc1	13.86	6.2	11.3	12.31	3.52	3.62	6.07	5.28	-1.065	0.00693956								No	No
Nomo1	162.2	177.21	131.23	176.65	61.55	82.38	75.22	68.62	-1.064	1.27152e-18								No	No
Rnf114	35.86	27.47	37.37	34.75	12.31	10.86	15.17	23.38	-1.064	7.42613e-06								No	No
Mrpl20	134.49	142.66	172.95	161.45	55.4	81.47	69.76	63.35	-1.063	1.46009e-17								No	No
B4galt3	31.79	22.15	29.55	27.51	14.07	23.54	9.1	9.8	-1.063	0.000110133								No	No
Slc12a9	9.78	20.38	16.51	7.24	7.91	5.43	4.85	4.52	-1.063	0.014227								No	No
Psmb8	58.69	61.14	81.69	70.23	27.26	28.97	34.58	26.39	-1.062	4.15331e-10								Psmb8	No
Sqstm1	1093.83	1029.6	1049.85	1085.97	479.24	464.38	462.24	461.52	-1.061	4.02342e-109								No	No
Snx16	52.16	47.85	56.49	45.61	21.1	19.01	24.87	21.87	-1.061	1.01503e-09								No	No
Cep95	28.53	25.7	16.51	23.89	11.43	10.86	9.1	10.56	-1.061	8.78902e-05								No	No
Mrps31	89.66	65.57	98.21	76.02	37.81	39.83	38.82	27.15	-1.06	4.50402e-10								No	No
Cep170b	94.55	70	60.84	71.67	33.41	31.68	21.84	39.21	-1.06	4.32881e-08								No	No
Polr1a	125.52	125.82	133.84	112.22	51	55.22	66.73	41.48	-1.058	1.8371e-15								No	No
Abcb1b	61.13	86.83	66.05	65.16	25.5	38.02	28.51	28.66	-1.058	1.48686e-09								No	No
Wac	114.11	122.28	125.15	106.43	48.36	51.6	53.38	50.53	-1.057	1.13532e-19								No	No
Pigl	6.52	15.06	9.56	12.31	0.88	4.53	5.46	6.79	-1.057	0.016893								No	No
Fam220a	14.67	18.61	17.38	21.72	5.28	8.15	12.13	6.03	-1.056	0.000968058								No	No
Gpatch2l	13.86	13.29	13.04	15.2	2.64	6.34	9.1	5.28	-1.056	0.00192771								No	No
Nolc1	338.26	349.99	271.15	335.2	132.78	152.08	145.59	150.07	-1.055	2.44286e-33								No	No
Ap1b1	67.65	73.54	88.65	76.74	36.93	38.92	30.33	30.16	-1.054	9.71803e-12								No	No
Rrm2b	21.19	22.15	15.64	15.2	9.67	9.96	8.49	4.52	-1.054	0.000696716								No	No
Ttll4	19.56	18.61	20.86	13.76	6.16	6.34	7.28	12.07	-1.053	0.000722013								No	No
Trip6	286.91	230.37	273.76	249.05	131.9	94.14	104.34	128.95	-1.052	1.43439e-22								No	No
Bud31	170.35	157.72	205.97	156.38	80.02	65.18	66.12	87.48	-1.052	1.49937e-17								Bud31	No
Rab11fip3	35.05	38.99	41.72	36.2	11.43	20.82	19.41	14.33	-1.052	3.57297e-07								No	No
Gmeb1	44.83	50.51	27.81	45.61	18.47	17.2	17.59	23.38	-1.051	1.6229e-06								No	No
Tbc1d12	39.94	24.81	32.16	27.51	13.19	11.77	14.56	14.33	-1.051	1.2077e-05								No	No
Pdcd11	119.82	108.99	110.37	103.53	34.29	56.12	46.71	54.3	-1.05	5.36365e-16								Pdcd11	No
Eef1e1	28.53	29.24	20.86	21.72	10.55	5.43	19.41	10.56	-1.05	0.000656385								No	No
Pisd	11.41	15.95	24.33	22.44	6.16	9.05	11.53	5.28	-1.05	0.00316946								No	No
Aimp2	219.25	252.53	218.14	254.84	91.45	125.83	115.26	89.74	-1.049	9.18078e-22								No	No
Hdac4	58.69	38.99	52.14	64.43	22.86	27.16	23.66	23.38	-1.048	5.00392e-08								No	No
Emx2	31.79	23.04	36.5	33.3	14.07	11.77	15.77	12.82	-1.048	6.74238e-06								No	No
Rptor	27.71	15.06	20.86	24.62	11.43	8.15	13.35	3.77	-1.048	0.0014693								No	No
Tmem38b	6.52	6.2	5.21	6.52	5.28	2.72	0.61	3.02	-1.048	0.0445732								No	No
Fam104a	388.79	323.41	342.42	351.13	142.45	163.85	145.59	171.18	-1.047	2.69224e-36								No	No
Ypel5	83.95	93.04	121.67	99.19	54.52	36.21	41.86	42.98	-1.047	2.59611e-11								No	No
Farsb	468.67	417.33	396.3	439.46	186.42	165.66	204.43	199.84	-1.046	9.44701e-41								No	No
Set	938.15	844.41	845.61	810.13	363.17	441.75	327.57	395.91	-1.045	1.86243e-38								No	No
Zw10	46.46	43.42	53.88	67.33	19.35	18.1	27.3	25.64	-1.045	3.79981e-07								No	No
Pmpca	60.32	66.45	70.4	70.23	32.54	24.44	36.4	23.38	-1.044	2.48243e-10								No	No
Ankrd11	849.31	878.97	858.65	910.77	358.77	409.16	400.97	380.83	-1.043	8.36772e-79								No	No
Rsl1d1	590.11	514.8	639.64	532.13	247.09	236.26	235.97	291.84	-1.043	3.72226e-34								No	No
Ing3	29.34	29.24	24.33	32.58	23.74	12.67	12.74	9.05	-1.043	5.71709e-05								No	No
Nr2c2ap	30.97	26.58	25.2	24.62	9.67	13.58	15.77	6.79	-1.043	5.82472e-05								No	No
Smg9	22.01	15.06	5.21	20.27	5.28	7.24	7.28	9.8	-1.043	0.00728988								No	No
Crcp	38.31	31.9	52.14	37.65	23.74	11.77	23.05	8.3	-1.042	0.000176062								No	No
Pim3	155.68	132.91	167.73	131.04	54.52	57.93	76.43	67.87	-1.041	1.14974e-16								No	No
Arid1a	90.47	64.68	75.61	75.29	33.41	33.49	29.72	39.97	-1.041	3.74128e-11								Arid1a	No
Acer3	26.9	22.15	30.42	25.34	8.79	18.1	13.95	4.52	-1.041	0.000365766								No	No
Uqcrq	803.66	725.68	781.3	807.24	355.25	348.51	322.11	362.73	-1.04	6.61263e-64								No	No
Gmps	217.62	217.97	238.13	220.81	109.04	112.25	88.57	92	-1.038	4.9315e-27								No	No
Ogfod3	14.67	5.32	13.04	8.69	4.4	6.34	4.25	3.77	-1.037	0.0160459								No	No
Slk	336.63	362.4	351.98	339.55	165.32	157.51	143.16	156.1	-1.036	1.15683e-41								No	No
Cpsf7	48.09	42.53	59.1	58.64	33.41	13.58	24.26	22.62	-1.036	1.28275e-06								No	No
Gnb4	70.91	73.54	78.22	82.53	16.71	39.83	32.76	38.46	-1.035	1.76765e-10								No	No
Zmym4	65.21	48.73	51.28	48.51	17.59	20.82	24.87	31.67	-1.035	1.00497e-07								No	No
Gtf2ird2	17.93	23.92	14.77	12.31	4.4	9.05	6.67	9.8	-1.034	0.0026485								No	No
Vcpkmt	8.97	12.4	9.56	13.76	10.55	3.62	6.07	2.26	-1.034	0.0139079								No	No
Nars	985.42	973.78	997.7	994.75	413.29	455.33	438.58	457.75	-1.032	5.47041e-106								No	No
Atxn2	133.67	116.07	99.07	124.52	58.92	50.69	55.81	47.51	-1.032	1.66964e-15								No	No
Srprb	86.4	59.37	67.79	79.64	42.21	30.78	33.36	27.15	-1.032	3.72017e-09								No	No
Fstl3	103.51	93.04	84.3	88.33	43.09	44.36	43.68	33.94	-1.031	4.22624e-14								No	No
Dgat2	46.46	25.7	40.85	33.3	17.59	10.86	19.41	16.59	-1.031	2.6259e-05								No	No
Egfl7	23.64	18.61	22.6	13.03	10.55	17.2	7.28	4.52	-1.031	0.00467144								No	No
Gltp	35.86	33.67	31.29	37.65	20.22	10.86	17.59	12.82	-1.03	1.92933e-06								Gltp	No
Brf1	30.97	38.1	25.2	24.62	27.26	12.67	13.35	9.05	-1.029	0.000377968								No	No
Lactb	41.57	38.99	42.58	39.82	13.19	18.1	18.2	22.62	-1.028	5.09209e-08								No	No
Ncapd3	57.06	85.95	73.87	72.4	28.14	36.21	23.05	46	-1.028	4.78431e-07								Ncapd3	No
Paxip1	25.27	22.15	24.33	21	4.4	15.39	8.49	12.82	-1.028	0.000282491								No	No
Sf3b6	114.93	113.42	128.62	128.14	59.8	47.98	44.89	75.41	-1.027	2.41074e-13								No	No
Ythdf2	90.47	93.92	88.65	81.09	51.88	29.87	30.33	51.28	-1.027	3.41375e-09								No	No
Zdhhc21	58.69	62.02	49.54	56.47	25.5	26.25	20.02	30.92	-1.027	4.29644e-09								No	No
Camsap1	83.14	78.86	86.04	71.67	34.29	34.4	30.94	45.25	-1.026	6.29641e-12								No	No
Dsn1	16.3	23.92	24.33	21.72	0.88	10.86	8.49	18.1	-1.026	0.00430426								Dsn1	No
Yy1	264.08	260.5	221.61	249.05	102.88	125.83	94.63	122.17	-1.025	5.00428e-24								No	No
Saal1	39.12	23.04	27.81	26.79	12.31	10.86	10.92	17.34	-1.025	9.04395e-05								No	No
Cpeb1	13.04	13.29	16.51	18.1	11.43	7.24	4.85	6.03	-1.025	0.00239071								No	No
Kin	83.95	112.53	93.86	103.53	43.09	44.36	38.22	52.03	-1.024	2.22364e-12								No	No
Glmn	41.57	31.9	33.02	40.54	18.47	5.43	20.02	15.84	-1.024	1.4808e-05								No	No
Naf1	106.77	104.55	106.03	119.46	34.29	55.22	44.89	58.82	-1.023	5.47668e-14								Naf1	No
Tcea1	107.59	99.24	109.5	102.08	31.66	38.92	58.24	52.79	-1.023	7.35557e-13								No	No
Gpr107	96.18	93.04	95.6	73.12	39.57	48.88	41.25	30.16	-1.023	8.50861e-11								No	No
4933404O12Rik	34.23	32.78	19.12	28.24	14.07	16.29	9.1	13.57	-1.023	0.00013833								No	No
Arfgap2	12.23	15.95	10.43	13.03	5.28	6.34	5.46	6.03	-1.023	0.00218165								No	No
Tmem186	17.93	9.75	13.04	10.14	8.79	0.91	4.25	7.54	-1.023	0.0159701								No	No
Tuft1	10.6	8.86	7.82	15.93	6.16	1.81	9.71	3.02	-1.022	0.0321025								No	No
Desi1	119.82	105.44	105.16	108.6	62.43	47.98	49.14	43.74	-1.02	6.96093e-16								No	No
Atad1	111.67	88.61	98.21	91.22	48.36	46.17	35.18	46.76	-1.02	6.63924e-13								No	No
Utp15	55.43	55.82	55.62	47.06	29.9	21.73	24.87	19.61	-1.02	5.24128e-09								No	No
Chaf1b	70.91	71.77	73	87.6	26.38	41.64	34.58	34.69	-1.018	4.59266e-11								No	No
Mtbp	54.61	55.82	50.41	44.16	35.17	18.1	25.48	18.85	-1.018	3.28715e-07								No	No
Ppm1a	271.42	303.03	244.21	241.09	116.07	107.72	124.96	119.9	-1.015	2.19717e-26								No	No
Tbc1d31	52.16	63.8	58.23	55.75	32.54	28.97	24.26	15.08	-1.015	9.23582e-08								No	No
Cers6	61.95	43.42	67.79	57.92	29.02	19.01	31.54	24.13	-1.014	1.44283e-07								No	No
Pter	6.52	11.52	17.38	8.69	0.88	7.24	4.85	5.28	-1.014	0.0315007								No	No
Zbtb44	73.36	60.25	65.18	73.12	38.69	19.01	33.36	28.66	-1.013	3.13938e-09								No	No
Cul2	42.38	40.76	63.44	39.09	19.35	16.29	22.44	20.36	-1.013	1.90949e-06								No	No
Surf6	29.34	38.1	33.89	36.2	10.55	21.73	15.17	15.84	-1.013	5.75495e-06								No	No
Pum2	156.49	130.25	148.61	150.59	65.95	62.46	78.25	57.31	-1.012	9.3897e-19								No	No
Uxt	19.56	14.18	6.95	11.58	6.16	2.72	13.95	4.52	-1.012	0.0343294								No	No
Dusp8	24.45	25.7	19.12	22.44	13.19	7.24	10.31	10.56	-1.011	8.58447e-05								No	No
Wdcp	12.23	12.4	14.77	8.69	4.4	3.62	7.28	5.28	-1.011	0.00591029								No	No
Stoml2	44.83	56.71	51.28	39.09	14.95	23.54	23.66	23.38	-1.01	4.48243e-07								No	No
Ddost	110.85	129.36	136.45	131.76	64.19	47.07	58.24	60.33	-1.009	1.02227e-16								No	No
Rhbdd1	26.9	32.78	19.12	31.86	7.03	26.25	14.56	10.56	-1.009	0.0011431								No	No
Taf1b	10.6	13.29	21.73	20.27	8.79	5.43	7.89	7.54	-1.009	0.00360764								No	No
Tmem126a	113.3	101.9	108.63	106.43	44.85	46.17	51.56	51.28	-1.008	9.13661e-19								No	No
Mrpl24	96.99	77.97	103.42	93.39	39.57	50.69	45.5	22.62	-1.008	1.22528e-09								No	No
Oip5	30.16	40.76	43.45	32.58	18.47	18.1	13.35	17.34	-1.008	6.27572e-06								No	No
Nfkb2	79.06	85.06	86.91	73.85	34.29	35.3	41.25	34.69	-1.007	2.60593e-13								No	No
Limd1	97.81	86.83	112.98	96.29	45.73	39.83	39.43	57.31	-1.006	3.67512e-12								No	No
Dpp7	46.46	45.19	48.67	75.29	19.35	28.97	28.51	13.57	-1.006	3.36745e-05								Dpp7	No
Cse1l	139.38	152.4	171.21	149.86	75.62	75.13	63.69	66.36	-1.005	2.07704e-19								No	No
Rbmx2	43.2	49.62	46.06	41.27	20.22	17.2	28.51	16.59	-1.005	6.66813e-07								No	No
Crlf2	28.53	40.76	34.76	31.13	15.83	19.92	15.77	6.79	-1.005	7.07743e-05								No	No
Znhit6	164.65	141.77	146.87	157.1	72.99	86.9	61.27	66.36	-1.004	1.8231e-18								No	No
Neu1	30.97	18.61	20.86	30.41	11.43	10.86	9.1	15.08	-1.004	0.000337549								No	No
Xpo7	166.28	144.43	127.75	116.56	66.83	68.8	62.48	52.03	-1.003	2.57577e-13								No	No
Eif2b1	22.82	36.33	26.07	31.13	18.47	10.86	9.71	15.08	-1.002	0.000179412								Eif2b1	No
Ccnl1	342.33	321.64	296.36	327.24	138.94	188.29	138.91	147.81	-1.001	1.08078e-29								No	No
Wdr3	220.07	210.88	194.67	165.79	74.74	88.71	101.3	96.53	-1.001	5.66415e-19								No	No
Taf5	21.19	26.58	23.47	27.51	8.79	7.24	13.35	14.33	-1	0.000101523								No	No
Kat14	18.75	16.84	6.95	17.38	4.4	10.86	6.67	6.79	-0.999	0.00726654								No	No
Lmbr1l	16.3	9.75	13.04	22.44	5.28	8.15	4.85	9.8	-0.999	0.00848612								No	No
Rnaseh2a	58.69	67.34	73	57.92	26.38	24.44	33.97	30.16	-0.998	1.20012e-09								No	No
Ltv1	66.84	45.19	69.53	62.99	29.02	23.54	31.54	28.66	-0.998	1.24697e-08								No	No
D030056L22Rik	57.87	40.76	59.97	33.3	16.71	18.1	27.9	24.13	-0.996	3.08248e-05								No	No
Plpp2	70.91	104.55	105.16	84.71	36.05	41.64	48.53	41.48	-0.994	6.52868e-10								No	No
Hps4	14.67	15.95	15.64	15.93	6.16	9.96	6.67	6.03	-0.994	0.000897381								No	No
Eaf1	10.6	17.72	8.69	5.79	6.16	4.53	2.43	5.28	-0.994	0.037324								No	No
Ppp6r3	156.49	161.26	185.11	129.59	65.95	73.32	64.91	101.05	-0.993	2.54507e-12								No	No
Herc4	47.27	60.25	64.31	47.06	29.02	17.2	21.84	31.67	-0.993	1.15214e-06								No	No
Mttp	4.08	10.63	7.82	14.48	4.4	5.43	3.64	3.77	-0.993	0.0381128								No	No
Rhob	213.55	226.83	215.53	178.82	94.09	85.09	97.67	107.08	-0.991	5.45082e-22								No	No
Srsf4	17.12	26.58	18.25	21	13.19	9.96	6.07	9.8	-0.99	0.00101708								No	No
Cpsf2	154.05	160.38	177.29	173.03	73.86	75.13	85.53	69.38	-0.989	9.9711e-22								Cpsf2	No
Ddx55	39.94	38.1	52.14	41.99	15.83	22.63	27.9	9.8	-0.989	5.53842e-05								Ddx55	No
Zfp386	28.53	33.67	26.94	44.16	21.1	16.29	9.71	15.08	-0.989	0.000281909								No	No
Aifm2	20.38	10.63	25.2	16.65	6.16	9.05	7.89	10.56	-0.989	0.00299608								No	No
Cers2	158.94	167.46	182.51	145.52	73.86	65.18	72.19	93.51	-0.988	5.347e-17								No	No
Mrpl49	79.88	65.57	71.26	81.09	31.66	39.83	29.72	37.71	-0.988	5.39968e-11								No	No
Pelo	11.41	15.06	8.69	20.27	5.28	12.67	7.28	3.02	-0.988	0.0220489								No	No
Bcat1	191.54	198.48	206.84	218.64	104.64	95.05	95.85	74.66	-0.987	8.22901e-22								Bcat1	No
Imp4	99.44	89.49	101.68	93.39	42.21	53.41	46.1	33.18	-0.987	5.1681e-13								No	No
Cycs	69.28	84.18	74.74	76.02	57.16	31.68	26.08	39.21	-0.987	5.78171e-08								No	No
Etnk1	35.86	29.24	37.37	42.71	13.19	14.48	20.02	18.1	-0.987	5.14914e-06								No	No
Rtel1	34.23	21.27	39.11	26.79	10.55	11.77	14.56	18.1	-0.987	0.000179412								No	No
Erbb2	18.75	14.18	15.64	16.65	9.67	9.05	4.85	7.54	-0.987	0.0012076								No	No
Tmem62	9.78	7.09	10.43	5.07	2.64	1.81	3.64	6.79	-0.987	0.0413463								No	No
Wrnip1	22.01	21.27	19.12	23.89	8.79	9.96	12.13	8.3	-0.986	0.000117822								No	No
Cth	38.31	28.35	44.32	21.72	7.91	16.29	24.26	13.57	-0.986	0.00178054								Cth	No
Arl4a	6.52	6.2	10.43	7.24	1.76	4.53	4.25	3.02	-0.986	0.0269972								No	No
Rps19bp1	225.78	219.74	249.43	215.75	93.21	120.4	112.22	94.26	-0.985	2.11902e-24								Rps19bp1	No
Drg2	70.1	77.09	59.1	68.78	25.5	28.97	44.89	30.92	-0.984	2.22359e-08								No	No
Eno2	22.01	31.01	20.86	21.72	7.91	9.96	10.31	15.08	-0.984	0.000339731								No	No
Ttc13	96.99	99.24	88.65	78.91	52.76	28.06	41.86	42.98	-0.983	2.8069e-10								No	No
Nip7	95.36	97.47	110.37	83.26	44.85	25.35	44.28	53.54	-0.983	4.79074e-10								No	No
Rbbp5	74.99	59.37	66.05	66.61	32.54	38.92	26.08	28.66	-0.983	1.24324e-09								No	No
Pa2g4	1136.21	1136.81	1081.13	1202.53	521.45	525.94	548.38	509.78	-0.982	1.45755e-78								No	No
Tmem11	91.29	89.49	93.86	82.53	39.57	39.83	43.07	41.48	-0.981	5.688e-15								No	No
Utp20	85.58	117.85	85.17	104.25	46.61	34.4	43.07	68.62	-0.981	3.49693e-08								Utp20	No
Cdsn	90.47	91.26	77.35	78.91	48.36	40.74	36.4	33.94	-0.98	1.92131e-11								No	No
Tbl3	53.79	53.16	64.31	64.43	25.5	24.44	32.15	25.64	-0.98	4.20512e-09								No	No
Sclt1	42.38	43.42	40.85	45.61	23.74	15.39	17.59	23.38	-0.98	1.50634e-07								No	No
Wdr54	17.12	9.75	17.38	9.41	7.03	4.53	6.07	6.79	-0.98	0.00833279								No	No
Kras	316.25	319.87	309.39	338.1	131.02	158.41	154.69	150.07	-0.979	1.04996e-36								No	No
Osbpl2	32.6	41.64	53.88	49.23	24.62	18.1	24.87	13.57	-0.979	2.87874e-05								Osbpl2	No
Fam204a	48.9	54.94	71.26	58.64	29.9	28.97	18.2	30.16	-0.978	7.87696e-07								No	No
Umps	86.4	93.04	97.34	82.53	50.12	41.64	37	39.97	-0.977	1.53123e-12								No	No
Riox2	31.79	19.49	23.47	31.13	6.16	10.86	15.77	14.33	-0.977	0.000528525								No	No
Pcnx	14.67	14.18	12.17	12.31	4.4	4.53	6.07	9.05	-0.977	0.00311634								No	No
Mrnip	15.49	7.97	8.69	15.2	4.4	3.62	6.67	6.79	-0.977	0.0129958								No	No
Xpc	27.71	22.15	12.17	15.2	9.67	2.72	13.95	7.54	-0.977	0.013686								No	No
Ddit4	181.76	150.63	191.2	157.83	80.9	75.13	76.43	83.71	-0.976	2.18992e-19								No	No
Gpatch8	80.69	86.83	88.65	76.74	38.69	36.21	40.64	37.71	-0.975	1.85531e-13								No	No
Dbr1	57.06	85.95	71.26	91.22	34.29	35.3	38.22	36.95	-0.975	1.02116e-08								No	No
Bcl7a	26.9	17.72	18.25	29.68	9.67	15.39	8.49	10.56	-0.975	0.000988301								No	No
Ddx18	114.93	96.58	152.96	131.76	55.4	61.56	43.68	67.12	-0.974	1.60097e-09								No	No
Rrs1	102.7	93.92	126.02	99.91	37.81	47.98	57.63	48.26	-0.973	7.48841e-12								No	No
Btbd19	14.67	17.72	18.25	13.03	6.16	11.77	5.46	7.54	-0.973	0.00269499								No	No
Pdss2	20.38	8.86	9.56	15.93	14.95	0.91	5.46	7.54	-0.973	0.0447566								No	No
Ppan	60.32	103.67	89.52	72.4	35.17	34.4	40.04	39.21	-0.971	5.99546e-08								Ppan	No
Asf1b	72.54	68.23	76.48	62.26	37.81	32.59	30.94	29.41	-0.97	1.194e-10								No	No
Mcoln1	27.71	24.81	31.29	28.24	13.19	13.58	13.35	12.07	-0.97	9.78675e-06								No	No
Foxred1	20.38	24.81	13.91	20.27	2.64	9.96	8.49	14.33	-0.97	0.00459516								No	No
Casc3	94.55	108.99	86.91	80.36	45.73	34.4	38.82	52.79	-0.969	4.56877e-10								No	No
Btbd9	74.17	54.05	38.24	51.4	25.5	19.92	30.33	21.87	-0.969	1.1789e-05								No	No
Cdk18	5.71	15.95	8.69	10.14	3.52	2.72	7.28	3.77	-0.968	0.039578								No	No
Taf7	31.79	28.35	38.24	23.89	10.55	18.1	16.38	11.31	-0.967	0.000112992								No	No
Lama5	8.15	10.63	8.69	13.03	5.28	5.43	6.07	0.75	-0.967	0.0230003								No	No
Ythdc1	167.91	155.95	151.22	145.52	89.69	71.51	58.84	75.41	-0.965	7.11133e-16								No	No
Cdk2ap2	51.35	48.73	53.01	52.13	22.86	29.87	20.02	24.89	-0.965	1.18741e-08								No	No
Zfpm2	48.09	66.45	53.01	68.78	24.62	28.97	32.15	24.13	-0.965	2.14964e-07								No	No
Tmem131	12.23	11.52	19.99	15.93	7.91	6.34	4.25	9.8	-0.965	0.00642529								No	No
Atpaf2	19.56	8.86	13.91	14.48	7.03	10.86	4.85	5.28	-0.965	0.010145								No	No
Ankrd1	542.02	571.51	670.06	632.76	284.03	292.39	279.04	279.78	-0.964	3.19597e-37								No	No
Fam13b	90.47	93.04	98.21	83.98	25.5	32.59	51.56	51.28	-0.964	3.36155e-09								No	No
Ric1	40.75	29.24	34.76	38.37	21.98	11.77	21.23	10.56	-0.964	7.99495e-05								No	No
Dnajc11	35.86	23.92	30.42	43.44	10.55	14.48	21.23	15.08	-0.964	0.000242584								No	No
Ddx27	163.01	164.81	159.04	162.9	57.16	98.67	73.4	81.44	-0.963	1.46227e-17								Ddx27	No
Gins2	92.92	100.12	117.33	86.88	42.21	39.83	52.17	47.51	-0.963	1.08898e-11								No	No
Rfc3	122.26	101.9	116.46	70.95	38.69	49.79	49.14	61.08	-0.963	1.27826e-08								No	No
Wdr82	44.83	58.48	62.57	76.02	34.29	28.97	26.69	24.89	-0.963	1.13407e-06								No	No
Lamb2	143.45	147.09	170.34	176.65	65.95	100.48	82.5	56.56	-0.962	4.72929e-12								No	No
Timm29	36.68	23.92	38.24	30.41	12.31	15.39	15.77	16.59	-0.962	3.02763e-05								No	No
Wdr46	57.06	58.48	72.13	61.54	37.81	25.35	32.76	18.1	-0.961	4.37611e-07								Wdr46	No
Aasdhppt	48.09	42.53	63.44	54.3	19.35	22.63	23.66	32.43	-0.961	1.14633e-06								No	No
Atp2a2	189.91	170.12	189.46	172.31	70.35	85.09	99.48	82.2	-0.96	1.7287e-20								No	No
Eif2b2	121.45	137.34	123.41	138.28	59.8	60.65	52.17	95.77	-0.959	4.68386e-12								No	No
Ift46	79.06	76.2	106.03	61.54	37.81	36.21	33.36	38.46	-0.959	4.29836e-08								No	No
Nt5m	18.75	29.24	17.38	15.93	10.55	8.15	9.71	7.54	-0.959	0.00193628								No	No
Prmt3	88.03	88.61	101.68	82.53	43.09	33.49	45.5	45.25	-0.958	2.17998e-12								Prmt3	No
Wdr45	28.53	23.04	23.47	18.1	9.67	8.15	14.56	9.8	-0.958	0.000524063								No	No
Mgea5	198.88	171.01	211.19	205.61	92.33	88.71	90.99	99.54	-0.957	8.77655e-23								No	No
Gtf3a	98.62	104.55	59.97	70.23	35.17	48.88	40.64	33.18	-0.957	1.15308e-06								No	No
Mtf1	17.93	18.61	26.07	19.55	7.91	9.96	7.89	12.82	-0.957	0.000715101								No	No
Chchd7	17.12	24.81	30.42	40.54	13.19	15.39	13.35	10.56	-0.957	0.00129524								No	No
Zcchc14	15.49	15.95	13.04	17.38	5.28	8.15	9.71	5.28	-0.957	0.00217102								No	No
Dnajb9	13.04	10.63	25.2	25.34	5.28	9.96	9.71	9.8	-0.957	0.00981266								No	No
Dot1l	52.98	47.85	54.75	52.85	24.62	24.44	23.66	25.64	-0.956	2.16419e-09								No	No
Lrrc8b	8.97	9.75	13.91	8.69	3.52	2.72	4.85	8.3	-0.956	0.020179								No	No
Brip1os	352.93	382.78	338.07	428.6	177.63	200.96	174.1	142.53	-0.955	1.85684e-20								No	No
Snrpf	62.76	69.11	50.41	62.99	27.26	27.16	32.15	27.9	-0.955	6.87139e-09								No	No
Tfdp2	60.32	75.31	79.09	73.85	30.78	21.73	35.79	55.8	-0.955	8.57878e-07								No	No
Ddrgk1	120.63	120.5	118.19	118.73	56.28	59.75	59.45	49.77	-0.954	1.69532e-18								No	No
Map2k1	39.12	36.33	36.5	41.99	20.22	16.29	21.23	14.33	-0.954	1.18099e-06								No	No
Nif3l1	45.64	48.73	53.01	53.57	31.66	19.92	24.87	20.36	-0.953	1.41676e-07								No	No
Zfp959	13.86	15.06	6.08	11.58	6.16	5.43	4.85	6.03	-0.952	0.0130642								No	No
Grwd1	73.36	58.48	62.57	56.47	21.98	21.73	36.4	35.44	-0.951	2.12592e-07								No	No
Dmtf1	45.64	46.07	59.97	39.09	21.1	28.06	16.99	24.13	-0.951	6.47406e-06								No	No
Hexdc	10.6	7.97	6.95	7.24	1.76	2.72	4.25	6.03	-0.951	0.0289689								No	No
Slc1a4	83.14	64.68	69.53	75.29	33.41	23.54	41.25	35.44	-0.95	3.17618e-09								Slc1a4	No
Kbtbd2	39.12	38.1	49.54	32.58	22.86	19.01	17.59	15.84	-0.95	9.88262e-06								No	No
Zdhhc16	26.08	34.56	52.14	47.78	17.59	23.54	16.99	20.36	-0.95	0.000120443								No	No
Cinp	24.45	48.73	33.89	41.99	19.35	14.48	21.23	15.84	-0.95	0.000153763								No	No
Prep	88.84	67.34	107.77	73.12	34.29	34.4	41.86	42.23	-0.949	1.72711e-08								No	No
Mrpl50	47.27	40.76	44.32	45.61	20.22	19.92	24.26	18.85	-0.949	7.19656e-08								No	No
Cyth3	50.53	59.37	47.8	53.57	21.98	37.11	23.66	23.38	-0.949	2.34749e-07								No	No
Mier2	39.12	22.15	49.54	31.13	13.19	12.67	20.02	18.85	-0.949	0.000459912								No	No
Sowahc	15.49	14.18	9.56	14.48	7.91	6.34	4.25	7.54	-0.949	0.00555036								No	No
Zfp142	21.19	15.95	7.82	17.38	7.91	5.43	10.31	6.03	-0.949	0.00925071								No	No
Slc25a39	339.07	297.72	269.41	291.04	136.3	139.41	149.83	134.99	-0.948	2.56037e-27								No	No
Nhlrc2	39.12	59.37	51.28	49.23	13.19	22.63	33.36	23.38	-0.948	3.36349e-05								No	No
Mir17hg	17.12	10.63	14.77	13.03	5.28	9.05	4.25	8.3	-0.948	0.00611659								No	No
Scrn2	12.23	7.09	12.17	15.93	1.76	6.34	6.67	6.79	-0.948	0.0175464								No	No
Mcm7	652.06	645.94	546.65	645.07	287.54	309.59	314.83	282.04	-0.947	2.8171e-41								No	No
Mea1	105.14	85.95	93.86	115.84	45.73	45.26	50.96	47.51	-0.947	2.81264e-12								Mea1	No
Usp42	31.79	19.49	39.11	38.37	15.83	21.73	11.53	15.08	-0.947	0.000441346								No	No
Slc35d2	8.97	7.97	5.21	8.69	2.64	3.62	3.64	4.52	-0.947	0.0268316								No	No
Cep135	14.67	33.67	35.63	27.51	14.07	19.01	11.53	11.31	-0.945	0.00142796								No	No
Arhgap5	383.9	388.09	413.68	385.88	192.58	164.75	189.26	196.83	-0.944	1.26377e-39								No	No
Kat7	102.7	102.78	113.85	110.77	44.85	49.79	60.66	46.76	-0.944	2.12001e-14								No	No
Arl14ep	139.38	109.87	85.17	110.77	51.88	61.56	52.17	46	-0.944	7.60182e-10								No	No
Trim26	51.35	61.14	46.06	41.27	20.22	23.54	32.76	18.85	-0.944	1.03995e-05								No	No
Anp32b	959.34	1051.75	1007.26	1013.57	477.48	576.63	461.63	461.52	-0.942	5.71562e-45								No	No
Etf1	425.47	457.21	441.49	423.53	199.61	224.5	199.58	209.65	-0.941	3.3842e-42								No	No
Hsf2	67.65	64.68	72.13	52.85	23.74	32.59	32.15	32.43	-0.941	1.42082e-08								No	No
Trp53bp2	12.23	13.29	14.77	21.72	2.64	8.15	6.67	14.33	-0.941	0.0180819								No	No
Wsb1	70.1	85.95	85.17	74.57	49.24	30.78	37	36.95	-0.94	1.34578e-09								No	No
Mdc1	63.58	62.02	57.36	73.12	30.78	29.87	36.4	24.13	-0.94	1.41875e-08								No	No
Gars	621.09	622.01	613.57	592.22	308.65	268.85	301.49	285.06	-0.939	2.58934e-54								No	No
Baz1b	394.5	489.99	418.03	485.07	199.61	229.02	229.3	197.58	-0.939	2.94112e-25								No	No
Gm15706	8.15	7.97	9.56	13.76	2.64	16.29	4.85	3.77	-0.939	0.0446357								No	No
Tspan9	28.53	38.1	30.42	34.03	12.31	13.58	23.05	14.33	-0.938	9.59242e-05								No	No
Rpusd1	22.82	27.47	29.55	25.34	10.55	20.82	10.92	12.07	-0.938	0.000215292								No	No
Cox10	106.77	92.15	77.35	94.12	40.45	39.83	58.24	40.72	-0.936	2.02454e-09								No	No
Tnk2	71.73	52.28	69.53	66.61	33.41	34.4	27.9	30.16	-0.936	7.82361e-09								No	No
Rnf139	30.97	22.15	39.98	29.68	19.35	10.86	15.77	12.07	-0.936	0.000281292								No	No
Phf12	79.88	74.43	69.53	81.81	36.93	32.59	35.79	40.72	-0.935	1.41958e-11								No	No
Eif4enif1	50.53	46.96	50.41	58.64	19.35	19.01	30.33	27.9	-0.934	3.51254e-07								No	No
Trim32	25.27	23.92	24.33	23.17	14.07	13.58	9.71	9.8	-0.934	9.64725e-05								No	No
Ubap1	50.53	55.82	41.72	48.51	19.35	33.49	21.23	24.13	-0.933	1.30332e-06								No	No
Zfp513	21.19	24.81	15.64	20.27	11.43	5.43	10.92	10.56	-0.933	0.00107001								No	No
Anapc7	55.43	55.82	61.7	58.64	34.29	31.68	25.48	21.12	-0.932	3.99443e-08								No	No
Nudcd3	154.86	142.66	139.05	143.35	74.74	72.42	60.05	73.15	-0.93	3.75191e-18								No	No
Dyrk2	81.51	98.35	96.47	99.19	30.78	46.17	47.32	50.53	-0.93	6.00328e-11								No	No
Atp6v0b	431.17	414.67	413.68	466.97	189.06	204.58	234.15	199.84	-0.929	8.63616e-34								No	No
Rab35	46.46	40.76	50.41	55.75	21.1	18.1	27.3	24.89	-0.929	6.58886e-07								No	No
Dtymk	65.21	69.11	67.79	55.02	22.86	23.54	35.18	49.77	-0.929	2.29229e-06								No	No
Dgkd	40.75	32.78	33.89	58.64	21.1	16.29	21.84	15.84	-0.929	0.000108835								No	No
Upf3b	141.82	139.11	142.53	140.45	68.59	78.75	63.09	63.35	-0.928	3.84493e-19								No	No
Gtf2h1	131.23	140.88	128.62	153.48	61.55	73.32	49.74	76.92	-0.928	1.0852e-12								No	No
Scarf2	18.75	20.38	20.86	18.1	8.79	11.77	10.92	5.28	-0.928	0.000924107								No	No
Cdk8	13.86	20.38	17.38	16.65	8.79	9.96	4.25	9.8	-0.928	0.00392079								No	No
Top3a	7.34	17.72	9.56	12.31	6.16	6.34	4.85	4.52	-0.928	0.021765								No	No
Cct8	803.66	828.46	776.09	834.03	400.98	406.45	382.77	371.03	-0.927	2.50942e-58								No	No
D10Wsu102e	123.08	127.59	115.59	126.7	61.55	61.56	59.45	55.05	-0.927	1.28418e-17								No	No
Ppp1r10	105.14	97.47	115.59	81.81	49.24	52.5	46.71	45.25	-0.927	4.5897e-11								No	No
Ints7	57.87	65.57	54.75	65.88	25.5	28.97	36.4	24.89	-0.927	3.79228e-08								No	No
Dnttip2	312.99	313.66	298.09	286.7	165.32	129.45	157.11	132.72	-0.926	1.54845e-26								Dnttip2	No
Emp2	149.16	168.35	164.26	150.59	62.43	88.71	77.65	75.41	-0.926	7.42245e-18								No	No
Ammecr1l	122.26	119.62	128.62	161.45	51	54.31	67.94	77.67	-0.926	5.19901e-11								No	No
Ptrh2	74.99	94.81	92.99	89.77	45.73	29.87	49.74	39.21	-0.926	1.45818e-09								No	No
Mbd1	25.27	28.35	26.94	23.89	14.95	11.77	10.92	12.82	-0.926	5.70311e-05								No	No
Carhsp1	136.93	140.88	143.4	118.73	42.21	61.56	72.79	70.13	-0.925	3.58775e-13								No	No
Inpp5b	17.93	16.84	20.86	30.41	11.43	5.43	9.1	14.33	-0.925	0.00435047								No	No
Prkdc	14.67	19.49	28.68	12.31	17.59	6.34	4.25	11.31	-0.925	0.0311878								No	No
Pds5b	199.69	202.91	204.23	215.02	104.64	102.29	85.53	104.07	-0.924	2.83243e-22								Pds5b	No
Ndufa12	312.99	352.65	298.96	357.65	184.66	171.09	151.65	132.72	-0.924	3.30541e-19								No	No
Zfp397	21.19	32.78	26.94	37.65	7.91	22.63	13.95	15.08	-0.924	0.0014073								No	No
Isg20l2	26.9	22.15	21.73	13.03	14.95	8.15	8.49	9.8	-0.924	0.00388303								No	No
Utp4	121.45	117.85	130.36	129.59	51.88	66.08	56.42	67.12	-0.922	1.88472e-16								No	No
Sart3	89.66	87.72	106.03	83.98	36.05	52.5	42.46	46	-0.922	4.42711e-11								No	No
Thoc6	43.2	49.62	53.01	52.13	33.41	24.44	20.62	21.87	-0.922	9.88733e-07								No	No
Ankib1	35.05	14.18	26.07	31.13	21.98	12.67	11.53	11.31	-0.921	0.00288837								No	No
Nfs1	13.86	12.4	20.86	10.86	6.16	3.62	6.67	15.84	-0.921	0.0247636								No	No
Ptpn11	175.24	223.29	191.2	185.34	89.69	105.91	81.89	95.02	-0.917	7.2815e-17								No	No
Enpp4	19.56	19.49	13.91	23.89	12.31	7.24	5.46	12.82	-0.917	0.0053135								No	No
Tmem181a	16.3	22.15	13.04	18.1	4.4	7.24	9.71	11.31	-0.916	0.00421658								No	No
Zfp628	17.93	12.4	20.86	7.96	2.64	8.15	6.07	11.31	-0.916	0.0324543								No	No
Snrpb	352.11	353.54	351.11	312.76	172.35	149.36	171.67	166.66	-0.915	8.24595e-32								No	No
Agfg1	135.3	120.5	127.75	144.8	61.55	70.61	57.02	69.38	-0.915	1.42323e-15								No	No
Pdap1	829.75	817.83	779.56	833.3	371.08	421.84	380.95	409.49	-0.914	3.91653e-59								No	No
Bst2	145.9	171.9	172.95	199.09	94.97	84.19	83.71	73.9	-0.914	1.65764e-14								Bst2	No
Poc1b	44.01	34.56	39.98	35.48	21.98	19.92	18.2	15.08	-0.914	4.41992e-06								No	No
Nhlrc3	12.23	22.15	14.77	15.93	7.91	10.86	3.64	9.05	-0.914	0.0113043								No	No
Ruvbl2	33.42	33.67	35.63	41.27	23.74	9.05	12.74	23.38	-0.913	0.000332473								No	No
Hs1bp3	28.53	23.92	12.17	15.93	7.03	9.05	16.99	7.54	-0.913	0.0157002								No	No
Chd1	262.45	249.87	241.6	259.91	107.28	132.16	133.46	117.64	-0.912	1.48568e-26								No	No
Cbll1	55.43	42.53	47.8	49.23	19.35	19.01	26.08	28.66	-0.912	5.10844e-07								No	No
Tmem238	16.3	23.92	6.08	17.38	3.52	6.34	11.53	9.8	-0.912	0.0296083								No	No
Qk	158.94	172.78	161.65	179.55	72.99	82.38	77.65	94.26	-0.911	7.76636e-19								No	No
Atp6v1g1	83.14	76.2	120.8	94.12	39.57	47.07	45.5	42.23	-0.911	5.27474e-09								No	No
Rela	154.05	124.05	138.18	125.25	69.47	63.37	57.63	73.9	-0.91	2.9475e-14								No	No
Prpf39	79.88	73.54	76.48	74.57	37.81	31.68	35.79	42.23	-0.91	1.53134e-11								No	No
Tet3	35.86	42.53	32.16	32.58	16.71	12.67	16.38	25.64	-0.91	7.05357e-05								No	No
Zwilch	45.64	58.48	63.44	57.92	31.66	22.63	29.12	25.64	-0.908	2.75778e-07								No	No
E130311K13Rik	14.67	7.97	15.64	10.86	6.16	5.43	6.07	6.03	-0.907	0.0114543								No	No
Rab8b	31.79	51.39	38.24	30.41	19.35	13.58	17.59	19.61	-0.906	0.000122015								No	No
Taf1d	362.71	349.11	393.69	356.92	171.47	159.32	179.56	199.84	-0.905	5.09166e-32								No	No
Fsbp	13.04	10.63	13.91	10.14	7.91	5.43	5.46	4.52	-0.905	0.00902987								No	No
Eif5	625.16	624.67	590.97	590.04	257.65	285.15	326.97	305.42	-0.904	5.2491e-42								No	No
Aff1	74.99	75.31	53.01	88.33	26.38	31.68	39.43	50.53	-0.904	4.83827e-06								No	No
Ubxn7	52.98	40.76	33.02	36.92	13.19	16.29	22.44	25.64	-0.904	0.000102841								No	No
Ormdl2	25.27	22.15	35.63	18.1	14.07	7.24	16.38	9.05	-0.904	0.00396332								No	No
Letm1	78.25	75.31	80.82	86.88	35.17	41.64	35.18	46	-0.903	6.06525e-11								No	No
Crkl	80.69	77.97	96.47	91.95	40.45	41.64	49.14	36.95	-0.903	1.38479e-10								No	No
E4f1	8.97	20.38	17.38	8.69	6.16	5.43	5.46	9.05	-0.903	0.0291951								No	No
Mpp6	128.78	134.68	89.52	135.38	62.43	56.12	57.63	71.64	-0.901	5.01157e-11								No	No
Atp6v1c1	141.82	116.96	122.54	131.04	59.8	79.66	45.5	66.36	-0.901	8.34791e-11								No	No
Wdr48	112.48	96.58	108.63	79.64	51	36.21	51.56	53.54	-0.901	2.16635e-09								No	No
Meaf6	26.9	27.47	22.6	26.06	11.43	14.48	15.77	4.52	-0.901	0.000810957								No	No
Wdr47	7.34	14.18	11.3	10.14	2.64	6.34	4.85	6.79	-0.901	0.0220449								No	No
Nfxl1	8.97	21.27	16.51	23.89	12.31	11.77	4.25	7.54	-0.901	0.0245897								No	No
Atg5	87.21	99.24	88.65	87.6	49.24	38.92	44.89	43.74	-0.9	2.09066e-12								No	No
Mettl1	92.1	102.78	99.94	80.36	53.64	51.6	35.18	42.98	-0.9	6.20457e-09								No	No
Aim2	12.23	18.61	21.73	12.31	7.03	13.58	3.64	9.05	-0.9	0.0223814								No	No
Cwf19l1	21.19	29.24	15.64	15.2	5.28	9.05	13.95	9.05	-0.899	0.00904893								Cwf19l1	No
Tmem94	13.86	13.29	9.56	14.48	5.28	6.34	4.25	12.07	-0.899	0.0171609								No	No
Hmgn1	1235.65	1160.74	1281.02	1202.53	583.88	630.94	579.92	599.52	-0.898	3.22943e-71								No	No
Arhgap11a	92.1	83.29	74.74	83.26	40.45	52.5	32.76	42.23	-0.898	3.13664e-09								No	No
Diaph2	80.69	61.14	73	65.16	31.66	38.02	37.61	29.41	-0.898	8.91172e-09								No	No
Mcmbp	149.16	94.81	123.41	99.91	51.88	68.8	59.45	36.2	-0.897	4.8567e-07								No	No
Zfp777	29.34	25.7	26.94	21	9.67	9.96	18.81	12.07	-0.897	0.000810448								No	No
BC030867	17.93	18.61	19.99	21.72	7.03	13.58	7.89	10.56	-0.896	0.00114653								No	No
Pde12	25.27	27.47	34.76	21.72	13.19	13.58	10.31	16.59	-0.895	0.000503346								No	No
Dync1li1	155.68	153.29	167.73	167.24	61.55	70.61	94.03	85.22	-0.894	1.88312e-15								No	No
Diablo	52.98	38.99	65.18	52.85	27.26	23.54	23.66	29.41	-0.894	3.38419e-06								No	No
Mob2	35.05	38.1	45.19	54.3	22.86	18.1	22.44	20.36	-0.894	1.99515e-05								No	No
Fam219b	23.64	16.84	6.08	21	7.91	8.15	10.92	8.3	-0.894	0.0126712								No	No
Atad2	602.34	591	587.5	581.36	268.2	300.54	298.45	292.6	-0.893	1.01774e-55								No	No
Psip1	489.86	505.94	446.71	528.51	250.61	240.79	241.43	242.07	-0.893	6.83177e-36								No	No
Fam135a	51.35	60.25	45.19	52.85	19.35	20.82	33.36	27.9	-0.893	2.99793e-06								No	No
Med22	47.27	38.99	39.98	35.48	14.07	16.29	33.36	21.12	-0.893	0.000150905								No	No
Mdh2	634.13	598.09	590.97	666.79	327.11	324.07	300.27	248.11	-0.891	1.00951e-28								No	No
Fbln5	171.17	167.46	193.8	186.79	87.93	89.62	98.88	69.38	-0.891	1.15458e-16								No	No
Zswim8	77.43	108.1	83.43	94.12	43.97	47.07	47.92	37.71	-0.891	3.00077e-09								No	No
Rnf216	78.25	62.91	40.85	53.57	24.62	27.16	33.36	28.66	-0.891	1.70689e-05								No	No
Gps2	106.77	104.55	116.46	131.76	65.95	50.69	57.63	52.79	-0.89	4.60692e-12								No	No
Gadd45b	29.34	46.96	45.19	41.27	21.98	17.2	20.62	21.12	-0.89	2.14385e-05								No	No
Lsm1	34.23	31.9	25.2	32.58	13.19	10.86	15.77	20.36	-0.889	0.000106303								No	No
Nol11	212.73	227.72	221.61	219.37	107.28	87.81	121.93	108.59	-0.888	2.37314e-21								No	No
Armc8	27.71	18.61	29.55	20.27	14.07	13.58	7.89	12.82	-0.888	0.00159985								No	No
Pcgf5	49.72	28.35	26.94	31.86	20.22	12.67	10.92	21.12	-0.888	0.00168926								No	No
Baz1a	251.86	264.93	277.24	262.81	118.71	136.69	133.46	131.97	-0.887	1.08099e-27								Baz1a	No
Kmt2a	266.53	281.77	300.7	319.28	140.69	133.07	140.13	162.89	-0.887	1.23244e-23								No	No
Pip5k1a	453.18	448.35	560.56	426.42	218.96	195.53	233.55	252.63	-0.887	2.62593e-23								No	No
Utp11	156.49	163.92	201.63	159.28	93.21	66.08	80.07	88.99	-0.887	1.00822e-13								No	No
Ptpn23	39.12	43.42	30.42	46.33	21.1	20.82	18.2	19.61	-0.887	1.74263e-05								No	No
Coa4	11.41	13.29	12.17	23.89	4.4	13.58	8.49	4.52	-0.887	0.0339122								No	No
Haus3	60.32	57.59	59.97	68.78	40.45	26.25	32.76	25.64	-0.886	1.44283e-07								No	No
Kif15	183.39	208.22	199.89	191.13	86.18	89.62	108.58	98.04	-0.885	2.97165e-20								Kif15	No
Nsd2	142.64	159.49	147.74	169.41	77.38	67.89	88.57	70.13	-0.885	2.57415e-15								No	No
Rbm22	128.78	140.88	111.24	120.18	71.23	53.41	63.69	58.82	-0.885	5.82782e-13								No	No
Tmem245	32.6	38.99	66.92	45.61	21.98	17.2	17.59	29.41	-0.884	0.000513615								No	No
Mcu	95.36	93.04	61.7	75.29	34.29	37.11	42.46	48.26	-0.883	1.66713e-07								No	No
Ppm1f	22.01	35.44	32.16	39.09	10.55	16.29	24.26	14.33	-0.883	0.00142306								No	No
Myg1	150.79	143.54	97.34	148.42	62.43	93.24	61.27	73.15	-0.881	2.65077e-09								No	No
Rbpj	198.88	161.26	190.33	147.69	69.47	84.19	94.63	95.77	-0.88	4.27851e-13								No	No
Chmp6	27.71	31.9	24.33	22.44	22.86	5.43	9.71	17.34	-0.88	0.0052545								No	No
Ascc2	50.53	42.53	34.76	46.33	26.38	20.82	23.05	16.59	-0.879	1.34e-05								No	No
Zfp60	13.86	13.29	11.3	7.24	5.28	5.43	4.85	6.79	-0.879	0.019466								No	No
Daam1	52.16	64.68	60.84	48.51	20.22	36.21	30.33	25.64	-0.876	2.67086e-06								No	No
Sec61a2	41.57	31.01	39.98	31.86	17.59	10.86	22.44	18.1	-0.876	9.94487e-05								No	No
Kif5b	967.49	929.47	923.83	981.72	459.02	486.11	474.98	475.09	-0.875	1.0925e-73								No	No
Timm50	106.77	98.35	124.28	131.04	47.48	59.75	63.69	57.31	-0.875	3.84167e-11								No	No
Xpo4	48.9	53.16	46.93	57.92	16.71	23.54	27.3	34.69	-0.875	5.06854e-06								No	No
Zfp740	61.95	38.1	59.97	39.82	21.98	30.78	24.87	21.87	-0.875	6.86544e-05								No	No
Zfp622	235.56	202.91	197.28	175.2	91.45	97.76	100.09	109.35	-0.874	1.33561e-16								No	No
Mrps10	67.65	57.59	66.92	63.71	25.5	39.83	32.15	30.92	-0.874	1.45799e-08								No	No
Krr1	86.4	124.05	99.07	87.6	62.43	41.64	44.28	49.02	-0.873	6.35536e-08								No	No
Rnd1	40.75	38.1	53.88	48.51	21.98	21.73	22.44	24.13	-0.873	3.69182e-06								No	No
Gtf3c6	111.67	111.64	111.24	132.49	70.35	63.37	55.81	47.51	-0.871	6.52931e-11								No	No
Rps6ka5	17.93	28.35	34.76	19.55	5.28	18.1	10.92	14.33	-0.871	0.0090336								No	No
Hax1	6.52	10.63	15.64	11.58	2.64	4.53	7.89	6.03	-0.871	0.0373778								No	No
Rbm28	301.58	287.97	269.41	299	124.87	162.94	152.87	138.76	-0.869	9.70069e-25								No	No
Psma3	137.75	112.53	139.92	129.59	64.19	58.84	65.51	70.89	-0.867	1.33212e-14								No	No
Magi3	82.32	82.4	70.4	83.98	45.73	33.49	32.76	49.02	-0.867	2.14373e-08								No	No
Ccdc136	35.86	33.67	27.81	28.96	21.1	17.2	15.17	8.3	-0.867	0.000422266								No	No
Rabgef1	22.82	23.92	27.81	21	5.28	15.39	12.74	12.07	-0.867	0.00110555								No	No
Prmt1	574.63	578.6	467.56	529.95	268.2	292.39	282.68	217.94	-0.866	2.00405e-21								No	No
Mnd1	17.93	21.27	13.91	18.82	8.79	9.05	11.53	6.03	-0.866	0.00352179								No	No
Neurl4	13.86	15.95	15.64	15.93	5.28	8.15	7.89	9.05	-0.864	0.00363351								No	No
Wdr75	109.22	101.01	82.56	94.84	43.09	59.75	41.86	52.79	-0.863	2.69409e-09								No	No
Zfp26	35.86	42.53	28.68	22.44	10.55	15.39	26.69	15.08	-0.863	0.0037459								No	No
Lats1	35.05	41.64	33.02	32.58	16.71	12.67	19.41	21.12	-0.862	3.94392e-05								No	No
Mllt6	39.94	32.78	39.11	47.78	31.66	20.82	20.02	14.33	-0.862	0.000174156								No	No
Plekhm2	43.2	38.1	25.2	36.2	34.29	12.67	12.74	22.62	-0.862	0.00288837								No	No
Mthfd1	30.97	42.53	38.24	49.23	17.59	21.73	19.41	22.62	-0.861	5.26984e-05								No	No
Brap	35.86	39.87	28.68	21.72	23.74	25.35	8.49	9.8	-0.861	0.0149192								No	No
Cebpz	312.17	344.68	325.9	373.57	171.47	172.9	163.79	174.96	-0.86	7.38595e-26								Cebpz	No
Zfp800	94.55	116.07	79.96	117.28	52.76	66.99	50.96	41.48	-0.859	2.56232e-07								No	No
Rpain	20.38	19.49	18.25	20.27	6.16	14.48	12.13	6.79	-0.859	0.00288837								No	No
Polr2e	311.36	304.8	351.98	332.31	175.87	147.55	161.97	169.68	-0.858	1.50838e-26								No	No
Tob2	66.84	57.59	53.88	59.37	30.78	20.82	31.54	33.94	-0.858	2.03605e-07								No	No
Mfap1b	70.1	54.94	78.22	48.51	32.54	26.25	26.69	52.03	-0.858	0.000117069								No	No
Coq10b	44.01	21.27	25.2	24.62	16.71	15.39	9.71	12.82	-0.858	0.0033809								No	No
Reep3	142.64	139.11	130.36	147.69	65.95	58.84	72.79	88.23	-0.857	7.68666e-14								No	No
Rfc5	109.22	102.78	92.12	92.67	43.97	48.88	46.71	69.38	-0.857	1.37938e-09								No	No
Mms22l	26.08	32.78	43.45	27.51	16.71	9.96	23.66	14.33	-0.857	0.00197103								No	No
Cdkn1b	167.91	166.58	217.27	160	87.93	75.13	82.5	104.82	-0.856	1.70116e-12								Cdkn1b	No
Ralgapa1	38.31	52.28	64.31	60.81	22.86	34.4	30.94	22.62	-0.856	3.51971e-05								No	No
Simc1	22.82	34.56	34.76	28.24	12.31	9.96	16.38	21.12	-0.856	0.00089292								No	No
Kdm4a	79.06	84.18	116.46	65.16	37.81	38.02	44.89	42.23	-0.855	8.05598e-07								No	No
Mbtd1	61.13	73.54	78.22	62.26	29.02	48.88	29.12	38.46	-0.855	1.53186e-06								No	No
Sf3b4	70.1	61.14	74.74	84.71	37.81	28.97	40.04	39.21	-0.854	5.64438e-08								No	No
Sf3a2	42.38	57.59	51.28	54.3	29.02	28.97	26.08	20.36	-0.854	3.1908e-06								No	No
Heatr1	78.25	71.77	109.5	100.63	41.33	49.79	32.76	56.56	-0.854	4.79777e-06								No	No
Fntb	28.53	24.81	24.33	33.3	15.83	9.05	12.13	19.61	-0.854	0.00080867								No	No
Smndc1	240.45	233.03	254.64	244.71	116.07	128.54	126.18	120.66	-0.853	5.46448e-25								No	No
Brip1	104.33	102.78	106.9	105.7	44.85	52.5	51.56	62.59	-0.853	3.7539e-13								No	No
Jmy	39.94	38.99	53.01	46.33	18.47	20.82	27.3	21.87	-0.853	1.1035e-05								No	No
Btbd10	22.82	24.81	20.86	23.89	9.67	13.58	7.89	20.36	-0.853	0.00296721								No	No
Cops6	114.11	134.68	137.31	108.6	57.16	62.46	69.15	58.82	-0.852	8.26639e-12								No	No
Vps26a	81.51	72.66	95.6	86.88	39.57	53.41	41.86	38.46	-0.852	5.54318e-09								No	No
Exosc4	73.36	57.59	63.44	69.5	58.04	26.25	36.4	29.41	-0.852	4.05111e-06								No	No
Mapk7	26.08	18.61	26.94	25.34	18.47	9.05	5.46	15.84	-0.852	0.00745064								No	No
Psmg2	58.69	46.07	63.44	41.27	27.26	16.29	27.3	31.67	-0.851	5.32013e-05								No	No
Golm1	56.24	56.71	59.1	60.09	25.5	29.87	26.08	36.95	-0.85	1.12064e-07								No	No
Fbxo45	26.08	22.15	22.6	19.55	15.83	6.34	8.49	15.08	-0.85	0.00316447								No	No
Zfyve26	17.93	27.47	16.51	11.58	9.67	9.05	7.89	8.3	-0.85	0.0122563								No	No
Cbx6	387.16	338.47	353.71	427.15	210.16	169.28	203.82	174.2	-0.849	1.58428e-19								No	No
Mthfd1l	129.6	116.96	117.33	150.59	59.8	63.37	59.45	76.92	-0.849	2.88353e-11								No	No
Asf1a	91.29	76.2	73.87	90.5	26.38	44.36	51.56	39.21	-0.849	1.81521e-07								No	No
Ccp110	8.97	7.09	8.69	8.69	3.52	3.62	4.85	4.52	-0.849	0.0371661								No	No
Dyrk1a	89.66	107.21	111.24	86.88	52.76	37.11	53.99	52.03	-0.848	3.96013e-09								No	No
Scrib	35.86	51.39	33.89	46.33	29.02	15.39	18.2	24.13	-0.848	0.000267406								No	No
Znrf2	6.52	12.4	16.51	17.38	2.64	7.24	10.31	6.03	-0.847	0.0464656								No	No
Glrx5	180.95	159.49	192.07	171.58	90.57	64.27	99.48	89.74	-0.846	8.00344e-15								No	No
Sel1l	174.43	163.03	159.04	178.82	82.66	93.24	87.96	80.69	-0.845	1.59429e-18								No	No
Eif3b	229.04	191.39	199.89	208.51	111.68	92.33	100.09	117.64	-0.845	5.0413e-18								No	No
Adh5	122.26	103.67	119.06	123.08	69.47	49.79	61.87	57.31	-0.845	2.22504e-12								No	No
Polr2g	126.34	105.44	101.68	111.49	42.21	66.08	58.84	56.56	-0.845	8.28086e-11								No	No
Ddx58	122.26	116.07	145.14	140.45	69.47	48.88	80.07	61.84	-0.845	3.77785e-10								Ddx58	No
Hoxa7	36.68	47.85	30.42	40.54	12.31	19.01	29.72	19.61	-0.844	0.000681262								No	No
Ctage5	116.56	93.92	106.03	110.05	61.55	43.45	62.48	48.26	-0.842	2.69225e-10								No	No
Dock11	44.01	38.99	34.76	42.71	16.71	22.63	21.84	20.36	-0.842	7.97348e-06								No	No
Tle3	41.57	43.42	45.19	34.75	18.47	17.2	23.05	23.38	-0.842	1.13455e-05								No	No
Psmf1	51.35	61.14	28.68	48.51	29.9	12.67	27.9	24.89	-0.842	0.000683316								No	No
Rexo4	122.26	127.59	100.81	127.42	63.31	57.03	62.48	62.59	-0.841	1.38267e-12								Rexo4	No
Cpeb4	25.27	25.7	5.21	22.44	7.91	11.77	11.53	12.82	-0.841	0.014671								No	No
Xylt2	16.3	8.86	19.99	13.76	4.4	10.86	7.89	6.79	-0.841	0.0198017								No	No
Plk2	137.75	119.62	142.53	141.9	60.67	73.32	64.91	78.43	-0.84	5.75928e-14								No	No
Cpox	101.88	97.47	96.47	85.43	55.4	49.79	38.22	50.53	-0.84	1.53672e-09								No	No
Slc15a4	31.79	31.9	42.58	29.68	22.86	16.29	15.77	15.08	-0.84	0.000219423								No	No
Fancd2	42.38	16.84	24.33	34.03	12.31	13.58	22.44	12.07	-0.84	0.00853697								No	No
Ccnt1	198.88	237.46	210.32	238.19	115.19	150.27	111.01	98.04	-0.839	9.78269e-14								Ccnt1	No
Nmt2	94.55	95.69	111.24	106.43	65.95	44.36	47.92	55.8	-0.839	5.52511e-10								Nmt2	No
Rrp15	64.39	66.45	59.1	74.57	19.35	43.45	33.97	34.69	-0.839	1.8562e-06								No	No
Arhgef2	215.99	196.7	247.69	207.78	100.24	111.34	111.01	115.38	-0.838	1.72231e-18								No	No
Prpf38b	255.93	302.15	239	297.56	135.42	146.65	151.65	126.69	-0.838	3.00173e-17								Prpf38b	No
Bmper	78.25	98.35	89.52	60.81	43.97	37.11	47.92	39.21	-0.838	7.52212e-07								No	No
Asxl2	57.06	62.02	61.7	46.33	22.86	34.4	25.48	33.18	-0.838	3.59304e-06								No	No
Sun1	45.64	25.7	65.18	21	15.83	22.63	21.23	12.82	-0.838	0.0126941								No	No
Slc25a28	28.53	38.99	26.07	19.55	16.71	11.77	7.89	19.61	-0.837	0.00800755								No	No
Mtdh	1198.16	1143.9	1215.84	1194.57	593.55	631.85	613.89	595.75	-0.835	1.05105e-79								No	No
Gnl3	489.86	529.86	501.46	519.82	247.97	250.75	266.3	277.52	-0.835	1.18064e-39								No	No
Lsm4	247.78	248.1	232.04	246.88	106.4	145.74	138.31	111.61	-0.835	1.3053e-18								No	No
Ogfr	115.74	102.78	76.48	102.08	45.73	52.5	60.66	46.76	-0.835	1.50856e-08								No	No
Sgce	16.3	7.09	13.91	13.03	4.4	6.34	6.67	8.3	-0.835	0.0221001								Sgce	No
Smc4	1223.43	1321.11	1319.26	1390.04	676.21	686.16	646.05	693.79	-0.834	3.07799e-51								No	No
Rassf7	29.34	23.04	21.73	28.24	13.19	21.73	13.35	5.28	-0.834	0.0047265								No	No
Ssrp1	758.83	687.58	700.48	720.36	371.08	349.42	371.86	376.31	-0.833	2.68392e-51								No	No
Vps29	124.71	109.87	140.79	120.18	58.92	59.75	69.15	64.1	-0.833	7.84695e-13								No	No
Cbl	135.3	131.14	138.18	110.77	67.71	57.03	73.4	63.35	-0.833	2.61676e-12								No	No
Pcmt1	89.66	130.25	145.14	107.15	63.31	66.08	57.63	57.31	-0.833	4.19393e-08								No	No
Rad51	74.17	86.83	66.05	89.77	28.14	35.3	46.1	49.02	-0.833	1.04603e-06								No	No
Rap1gds1	60.32	56.71	65.18	47.06	35.17	21.73	33.36	25.64	-0.833	6.39575e-06								No	No
Ddx10	186.65	197.59	213.79	199.09	93.21	118.58	107.37	92	-0.832	1.83524e-17								Ddx10	No
Gnl2	154.86	132.91	137.31	146.24	63.31	84.19	72.79	73.9	-0.832	6.04077e-15								No	No
Coro1c	272.23	208.22	290.27	212.85	120.47	133.07	120.11	122.92	-0.832	1.64651e-13								No	No
Igf2bp1	94.55	123.16	136.45	103.53	67.71	58.84	48.53	59.58	-0.832	3.79395e-08								No	No
L3mbtl2	41.57	41.64	36.5	50.68	17.59	20.82	31.54	19.61	-0.832	0.000119993								No	No
Wdr36	102.7	94.81	99.07	107.87	46.61	47.07	55.81	56.56	-0.831	2.72917e-12								No	No
Nfyb	191.54	144.43	142.53	132.49	70.35	74.23	68.55	89.74	-0.831	1.52131e-10								No	No
Pno1	66.02	61.14	82.56	48.51	36.05	27.16	25.48	43.74	-0.831	9.83905e-05								No	No
Yeats2	30.97	37.21	45.19	35.48	19.35	18.1	13.95	33.18	-0.831	0.000896831								No	No
Ywhag	411.61	376.57	400.64	402.53	206.64	219.97	194.72	200.6	-0.83	1.08625e-32								No	No
Coq5	67.65	70.88	70.4	78.19	37.81	37.11	40.04	32.43	-0.83	3.96013e-09								No	No
Pwp1	192.36	165.69	127.75	160.72	72.99	96.86	92.21	74.66	-0.829	2.19605e-10								No	No
Asb3	23.64	23.92	19.12	28.96	8.79	9.05	13.35	20.36	-0.829	0.00373391								No	No
Zmiz2	14.67	8.86	12.17	15.93	13.19	4.53	4.25	8.3	-0.829	0.0375826								No	No
Zfp106	459.7	502.39	486.68	499.55	228.63	289.67	250.53	249.61	-0.828	1.58663e-30								No	No
En1	96.99	92.15	97.34	91.95	46.61	45.26	44.89	58.07	-0.828	2.56265e-11								No	No
Rrn3	120.63	150.63	116.46	119.46	65.07	44.36	71.58	65.61	-0.828	7.79874e-10								No	No
Zfp871	154.05	153.29	145.14	135.38	73.86	87.81	73.4	69.38	-0.827	8.79443e-15								No	No
Tap1	59.5	51.39	45.19	52.13	24.62	28.06	27.3	27.15	-0.827	6.83055e-07								Tap1	No
Mrm3	13.86	23.92	13.04	10.86	7.03	6.34	8.49	6.79	-0.827	0.0210698								No	No
Cct4	317.06	303.92	332.86	336.65	142.45	144.84	183.2	214.17	-0.826	1.18763e-17								No	No
Slc16a1	185.02	202.02	177.29	224.43	89.69	120.4	112.22	83.71	-0.826	5.69701e-12								No	No
Fpgs	11.41	19.49	22.6	23.17	12.31	12.67	7.89	8.3	-0.826	0.00985007								No	No
Ncl	3907.47	4026.25	3865.66	3793.66	2047.98	2053.06	2002.44	1929.04	-0.825	3.73976e-83								No	No
Tom1l1	10.6	7.97	10.43	7.24	6.16	4.53	3.03	5.28	-0.825	0.0397698								No	No
Rab40c	44.01	43.42	44.32	44.89	29.9	19.01	14.56	27.15	-0.824	8.32421e-05								No	No
Prkar2a	295.06	294.17	274.63	308.42	141.57	174.71	146.8	150.82	-0.823	2.72781e-23								No	No
Mybbp1a	274.68	250.75	254.64	272.22	135.42	150.27	137.7	122.17	-0.823	1.58913e-22								No	No
Hn1l	56.24	88.61	72.13	74.57	31.66	46.17	32.15	42.23	-0.823	5.4113e-06								No	No
Atxn2l	44.83	50.51	51.28	49.23	16.71	25.35	32.15	24.13	-0.823	1.001e-05								No	No
Sap130	30.97	23.04	24.33	26.06	13.19	23.54	13.95	4.52	-0.822	0.00621926								No	No
Mphosph10	202.95	229.49	199.02	251.22	106.4	118.58	107.98	121.41	-0.821	7.82428e-16								Mphosph10	No
Chchd3	119	108.1	119.93	112.22	59.8	76.94	53.99	56.56	-0.821	1.43732e-11								No	No
Bcap29	47.27	42.53	33.89	37.65	21.98	16.29	24.87	18.85	-0.821	5.44545e-05								No	No
Rmnd5a	22.01	8.86	17.38	23.89	5.28	11.77	12.13	9.05	-0.821	0.0195526								No	No
Cdca8	145.08	134.68	145.14	143.35	62.43	87.81	72.19	75.41	-0.82	7.60873e-15								Cdca8	No
Otud4	125.52	126.71	98.21	127.42	61.55	58.84	67.94	61.08	-0.82	1.16084e-11								No	No
Hist3h2a	44.83	43.42	55.62	51.4	19.35	29.87	27.9	23.38	-0.82	6.36932e-06								No	No
Rep15	8.15	13.29	15.64	13.76	3.52	10.86	6.67	6.03	-0.82	0.0303421								No	No
Zfp644	202.95	211.77	205.1	225.16	129.26	116.77	97.06	105.58	-0.819	3.04179e-16								No	No
Ppat	66.84	70	59.97	59.37	26.38	36.21	37	31.67	-0.817	1.17394e-07								No	No
Fbxw11	66.02	67.34	75.61	78.19	44.85	25.35	42.46	32.43	-0.817	6.69269e-07								No	No
Pam16	64.39	65.57	73	82.53	38.69	38.92	40.64	30.16	-0.816	1.7245e-07								No	No
Tbcel	83.14	72.66	79.09	112.22	43.09	48.88	47.92	32.43	-0.816	2.29656e-06								No	No
L3mbtl3	22.82	12.4	14.77	16.65	7.91	12.67	9.1	5.28	-0.816	0.0148277								No	No
Rnf6	234.74	191.39	194.67	224.43	97.61	127.64	106.16	111.61	-0.815	1.58013e-15								No	No
Sap18	35.86	37.21	45.19	52.85	24.62	18.1	18.81	27.9	-0.815	0.000155579								No	No
Ints5	58.69	39.87	66.05	43.44	22.86	35.3	21.84	28.66	-0.815	0.000219068								No	No
Trmt13	30.16	39.87	26.94	26.06	20.22	9.05	15.77	16.59	-0.815	0.00131859								No	No
Slit2	176.06	145.31	189.46	178.1	79.14	92.33	87.96	101.05	-0.814	2.08533e-14								No	No
Tstd2	89.66	80.63	99.07	73.85	65.07	49.79	40.04	36.2	-0.814	2.05833e-06								No	No
Uqcr10	380.64	351.76	304.18	375.75	174.11	182.86	206.86	177.22	-0.813	1.80971e-21								No	No
Mrpl2	140.19	150.63	112.98	143.35	80.9	70.61	74.61	61.84	-0.813	3.29555e-11								No	No
Pfas	40.75	52.28	57.36	54.3	32.54	28.97	26.08	15.84	-0.813	8.11741e-05								No	No
Mtpap	29.34	30.13	25.2	22.44	15.83	12.67	12.74	14.33	-0.813	0.000490873								No	No
Il1rl1	30.16	32.78	32.16	22.44	17.59	17.2	8.49	16.59	-0.813	0.00195165								No	No
Lrrc20	17.12	35.44	23.47	25.34	10.55	12.67	16.99	9.8	-0.813	0.00647179								No	No
Ftsj3	393.68	457.21	387.61	415.57	228.63	207.3	212.92	205.87	-0.812	1.44843e-25								No	No
Tom1l2	49.72	62.91	69.53	57.19	30.78	27.16	32.76	32.43	-0.812	1.21588e-06								No	No
Pop5	30.16	25.7	22.6	37.65	23.74	10.86	16.99	12.07	-0.812	0.00340892								No	No
Larp1	238.82	279.99	284.19	268.6	143.33	146.65	130.42	141.77	-0.811	3.74475e-20								No	No
Lrrc58	185.02	194.05	185.98	167.24	94.97	98.67	86.75	101.81	-0.811	8.66942e-17								No	No
Cactin	66.84	57.59	59.1	57.92	29.02	31.68	35.18	28.66	-0.811	9.85298e-08								No	No
Rps6ka3	40.75	37.21	38.24	30.41	17.59	15.39	18.2	24.13	-0.811	9.94146e-05								No	No
Aup1	114.11	114.3	119.06	125.25	78.26	65.18	59.45	52.79	-0.81	4.83049e-11								No	No
Psme3	86.4	97.47	106.9	74.57	43.09	42.55	52.17	50.53	-0.81	5.24145e-08								No	No
Psmb10	53.79	54.05	47.8	56.47	29.02	29.87	22.44	30.92	-0.81	1.42449e-06								No	No
Trim33	29.34	42.53	39.98	49.23	17.59	18.1	29.72	19.61	-0.81	0.000633451								No	No
Mynn	15.49	15.95	19.99	15.2	13.19	4.53	10.92	6.03	-0.81	0.013775								No	No
Crtc1	13.86	22.15	10.43	13.03	6.16	4.53	7.28	11.31	-0.81	0.030685								No	No
Apex1	91.29	104.55	88.65	115.11	51.88	45.26	47.92	75.41	-0.809	2.44081e-07								No	No
Psen1	68.47	54.94	75.61	78.91	33.41	53.41	29.72	38.46	-0.809	1.1468e-05								No	No
Pigf	13.86	20.38	18.25	19.55	6.16	7.24	10.92	12.07	-0.809	0.00638484								No	No
Cnot6l	105.96	91.26	83.43	101.36	44.85	49.79	52.17	52.03	-0.808	3.58995e-10								No	No
Ptprm	11.41	17.72	19.12	16.65	8.79	5.43	10.31	8.3	-0.808	0.0100468								No	No
Zfp944	11.41	9.75	8.69	13.76	3.52	9.96	6.07	4.52	-0.808	0.0369026								No	No
Ppp4r3a	96.18	91.26	55.62	78.19	38.69	41.64	43.07	49.77	-0.807	1.41273e-06								No	No
Nr1d2	58.69	54.05	51.28	80.36	26.38	28.97	33.36	33.18	-0.807	1.31158e-05								No	No
Ubxn2a	26.08	34.56	38.24	32.58	19.35	9.05	17.59	19.61	-0.807	0.000622894								No	No
Ythdc2	10.6	16.84	11.3	12.31	18.47	5.43	6.07	5.28	-0.807	0.0425525								No	No
Eea1	383.08	335.82	307.65	427.87	175.87	185.57	211.1	177.22	-0.806	9.95547e-16								No	No
Comtd1	28.53	30.13	26.07	39.82	10.55	20.82	21.84	11.31	-0.806	0.00286242								No	No
Vgll3	159.75	175.44	170.34	184.62	105.52	92.33	83.71	85.97	-0.805	1.13612e-14								No	No
Pex11a	35.86	28.35	9.56	26.06	13.19	17.2	11.53	15.08	-0.805	0.0101095								No	No
Nup85	101.88	85.06	85.17	79.64	44.85	39.83	47.32	50.53	-0.804	3.82752e-09								No	No
Kpna6	13.04	12.4	19.12	21.72	10.55	9.96	9.71	3.77	-0.804	0.02265								No	No
Nsmaf	18.75	15.95	19.12	13.76	5.28	6.34	9.71	24.89	-0.804	0.0305937								No	No
Ube2d2a	236.37	233.03	251.16	236.02	126.63	119.49	125.57	128.2	-0.803	1.74144e-22								No	No
Rfc1	376.56	426.19	385.87	445.25	198.73	229.93	234.76	184.76	-0.803	2.78018e-19								No	No
Stambpl1	39.94	30.13	20.86	22.44	14.07	19.92	12.74	11.31	-0.803	0.0053622								No	No
Fastkd2	22.82	16.84	28.68	17.38	15.83	6.34	9.1	13.57	-0.803	0.0112371								No	No
Nhp2	156.49	173.67	164.26	204.89	79.14	101.39	106.16	67.12	-0.802	2.45028e-09								No	No
Lyrm4	55.43	53.16	43.45	65.16	26.38	30.78	26.08	31.67	-0.802	9.88314e-06								Lyrm4	No
Cstf2	204.58	147.97	187.72	194.03	95.85	108.63	103.12	85.22	-0.801	5.40814e-13								No	No
Cd3eap	113.3	131.14	110.37	107.15	48.36	66.08	62.48	63.35	-0.801	7.2791e-11								No	No
Msh2	70.1	77.97	61.7	48.51	29.9	38.92	32.76	35.44	-0.801	8.62544e-06								No	No
Plin2	431.99	402.27	387.61	451.04	204.89	230.83	243.86	177.97	-0.8	1.5025e-19								No	No
Eif4h	161.38	140	181.64	169.41	84.42	54.31	85.53	101.05	-0.8	3.38643e-10								No	No
Slu7	208.66	204.68	222.48	178.1	97.61	96.86	118.29	110.86	-0.799	1.57527e-15								Slu7	No
Casp8ap2	207.84	213.54	204.23	241.09	107.28	143.93	107.98	113.12	-0.799	5.79595e-15								No	No
Ddx56	69.28	77.97	76.48	81.81	50.12	36.21	38.82	38.46	-0.799	3.26957e-08								Ddx56	No
Ccm2	52.16	53.16	55.62	57.92	26.38	34.4	27.3	27.9	-0.799	4.0881e-07								No	No
Eif3j1	215.18	192.27	222.48	202.71	124.87	96.86	100.09	119.15	-0.798	8.10791e-16								No	No
Mcrip1	87.21	82.4	69.53	80.36	58.92	37.11	41.86	39.21	-0.798	1.70766e-07								No	No
Soga1	35.05	22.15	33.02	13.76	15.83	10.86	16.99	12.07	-0.798	0.0108412								No	No
Zfp746	10.6	7.97	6.95	10.86	6.16	4.53	3.64	5.28	-0.798	0.0427236								No	No
Rexo1	53.79	80.63	65.18	55.02	34.29	26.25	28.51	41.48	-0.797	3.77896e-05								No	No
Ttc7	8.97	13.29	17.38	12.31	2.64	6.34	7.89	9.05	-0.797	0.0337202								No	No
Rmdn3	54.61	43.42	53.01	47.06	31.66	18.1	31.54	21.12	-0.796	4.33538e-05								No	No
Zfp334	25.27	27.47	31.29	34.75	14.95	8.15	15.77	24.89	-0.796	0.00271314								No	No
Arel1	19.56	16.84	16.51	15.93	10.55	9.05	10.31	6.03	-0.796	0.00515404								No	No
Ccdc47	195.62	203.79	185.11	188.24	110.8	116.77	84.93	94.26	-0.795	6.1321e-14								No	No
Ifrd2	21.19	29.24	23.47	27.51	14.07	9.96	10.92	25.64	-0.795	0.00555344								No	No
Elf2	43.2	47.85	36.5	47.78	21.1	24.44	27.3	18.85	-0.793	3.43755e-05								Elf2	No
Rnf166	39.12	45.19	26.07	26.79	16.71	10.86	29.72	18.1	-0.793	0.00735836								No	No
Etv3	13.04	14.18	8.69	12.31	7.91	6.34	5.46	6.03	-0.793	0.0207834								No	No
Cbx1	424.65	461.64	471.91	421.36	219.84	247.13	235.97	234.53	-0.792	1.25968e-29								No	No
BC003965	55.43	44.3	39.11	37.65	24.62	20.82	25.48	20.36	-0.792	7.72428e-05								No	No
Thop1	23.64	31.9	26.94	31.86	17.59	11.77	20.02	9.05	-0.792	0.00259533								No	No
Larp7	359.45	357.97	366.75	410.5	212.8	191.91	206.25	177.97	-0.791	1.38695e-22								No	No
Ing5	66.02	56.71	53.88	59.37	31.66	33.49	23.66	36.2	-0.791	3.30256e-06								No	No
Wdr73	25.27	26.58	33.89	23.89	11.43	16.29	16.38	12.82	-0.791	0.000889689								No	No
AI314180	108.4	98.35	108.63	94.12	48.36	47.98	56.42	61.08	-0.79	8.56537e-11								No	No
Cyc1	201.32	223.29	161.65	227.33	114.31	108.63	103.12	116.89	-0.789	3.82045e-13								No	No
Abcf2	74.99	98.35	55.62	78.91	47.48	42.55	29.72	42.23	-0.789	5.24335e-05								No	No
Zbtb10	27.71	35.44	40.85	41.27	17.59	25.35	18.2	16.59	-0.788	0.000398723								No	No
Tma16	160.57	171.01	140.79	170.14	83.54	87.81	84.32	85.97	-0.787	1.69709e-14								No	No
Gpatch1	12.23	12.4	11.3	15.93	3.52	2.72	9.71	9.8	-0.787	0.0400467								No	No
Casp2	44.01	45.19	47.8	57.92	21.98	20.82	30.33	28.66	-0.786	2.54826e-05								No	No
Nop56	458.07	494.42	459.74	456.11	284.03	281.53	225.05	221.71	-0.785	4.42019e-18								No	No
Hprt	139.38	112.53	137.31	117.28	72.99	52.5	66.73	73.15	-0.785	2.33237e-10								No	No
Plekhj1	43.2	41.64	50.41	47.06	20.22	29.87	25.48	21.12	-0.785	1.22546e-05								No	No
Pcnx3	26.08	28.35	32.16	21	27.26	9.96	15.17	12.07	-0.785	0.00541687								No	No
D11Wsu47e	9.78	9.75	13.91	7.96	6.16	8.15	3.64	4.52	-0.785	0.048306								No	No
Cnppd1	113.3	126.71	138.18	122.35	67.71	53.41	78.25	62.59	-0.784	2.56979e-10								No	No
Evi5	115.74	117.85	119.06	81.81	53.64	49.79	59.45	71.64	-0.784	9.72585e-08								No	No
Gins3	44.83	49.62	41.72	58.64	26.38	20.82	30.94	24.13	-0.784	4.21392e-05								No	No
Sat1	14.67	15.06	18.25	15.93	7.91	9.05	9.1	7.54	-0.784	0.00659906								No	No
Ddx31	23.64	15.06	16.51	18.1	8.79	7.24	12.74	9.05	-0.784	0.00838054								Ddx31	No
Chtop	207.03	182.53	204.23	209.95	110.8	103.2	106.76	107.08	-0.782	3.98109e-18								No	No
Wdr12	162.2	141.77	178.16	173.03	80.9	90.52	94.03	82.2	-0.782	8.06382e-14								No	No
Ak2	158.94	137.34	130.36	113.66	61.55	80.57	68.55	74.66	-0.782	8.73061e-10								No	No
Spns1	20.38	28.35	21.73	28.96	14.07	12.67	7.89	18.1	-0.781	0.00600561								No	No
Cep152	11.41	15.95	16.51	13.03	9.67	4.53	4.85	13.57	-0.781	0.0385918								No	No
Dcbld2	141.01	132.02	123.41	120.18	72.11	74.23	62.48	67.87	-0.78	2.67188e-12								No	No
Acap2	55.43	49.62	55.62	53.57	20.22	30.78	30.33	30.92	-0.78	1.6782e-06								No	No
Cenpi	13.86	28.35	29.55	34.75	15.83	17.2	14.56	12.82	-0.779	0.00508523								No	No
Zfp472	20.38	12.4	13.91	10.86	9.67	6.34	5.46	9.05	-0.779	0.0288239								No	No
Phf5a	471.11	404.04	477.12	480.72	240.06	230.83	244.47	267.71	-0.778	2.14999e-26								No	No
Atm	153.23	157.72	172.08	175.93	129.26	85.09	80.07	88.23	-0.778	4.01297e-11								Atm	No
Slc35c2	61.95	56.71	36.5	57.19	25.5	30.78	33.36	26.39	-0.778	3.97499e-05								No	No
Orc1	24.45	23.04	13.91	18.82	12.31	18.1	8.49	7.54	-0.778	0.0170144								No	No
Strn3	389.61	348.22	361.54	309.86	196.97	184.67	172.28	202.1	-0.777	3.56985e-19								No	No
Snu13	115.74	116.96	106.03	90.5	51.88	66.08	41.25	64.85	-0.777	3.75825e-07								No	No
Slc7a6os	83.14	70	49.54	72.4	52.76	29.87	31.54	42.23	-0.777	0.00011129								No	No
Stxbp4	20.38	17.72	18.25	17.38	12.31	9.96	10.92	5.28	-0.777	0.00670852								No	No
Cog1	26.08	14.18	13.91	21.72	5.28	14.48	10.31	10.56	-0.777	0.0212466								No	No
Tapt1	29.34	21.27	22.6	13.03	10.55	9.05	9.71	20.36	-0.777	0.0241975								No	No
Unc119b	9.78	10.63	8.69	8.69	4.4	3.62	6.07	5.28	-0.777	0.0413786								No	No
Prrc2b	70.1	76.2	75.61	84.71	45.73	33.49	43.68	39.97	-0.776	4.53431e-08								No	No
Tmem60	12.23	13.29	13.91	10.14	6.16	5.43	6.67	7.54	-0.776	0.0191291								No	No
Atf4	1438.61	1579.84	1427.89	1434.93	811.63	777.59	810.44	691.53	-0.775	3.28301e-35								No	No
Ep400	61.95	73.54	71.26	80.36	32.54	44.36	35.18	42.23	-0.775	4.73547e-07								Ep400	No
Stx2	53.79	46.07	59.1	49.95	29.02	25.35	23.66	33.94	-0.775	9.71202e-06								No	No
Ift57	39.12	28.35	32.16	31.13	19.35	14.48	16.38	19.61	-0.775	0.000273195								No	No
Atxn3	19.56	28.35	25.2	28.24	7.03	12.67	18.2	13.57	-0.775	0.00445599								No	No
Fam118b	17.12	20.38	22.6	14.48	13.19	11.77	8.49	6.79	-0.775	0.011242								No	No
Rpl5	286.91	246.32	344.15	272.94	152.13	155.7	135.88	156.1	-0.774	4.49919e-15								No	No
Adamtsl5	19.56	22.15	23.47	18.82	10.55	11.77	10.92	11.31	-0.774	0.00198177								No	No
Gdnf	55.43	55.82	67.79	68.05	29.9	31.68	37.61	31.67	-0.773	1.17147e-06								No	No
Pip4k2c	35.86	33.67	63.44	47.78	13.19	25.35	25.48	25.64	-0.773	0.00181395								No	No
Man1b1	56.24	46.07	40.85	46.33	20.22	35.3	21.84	27.9	-0.772	0.000103596								No	No
Bms1	219.25	240.12	246.82	239.64	121.35	105.01	131.64	141.02	-0.771	3.33394e-17								No	No
Otub1	104.33	114.3	105.16	98.46	54.52	49.79	66.12	52.03	-0.771	5.18964e-10								No	No
Zbtb18	19.56	24.81	31.29	25.34	8.79	18.1	11.53	15.84	-0.771	0.00406488								No	No
Med1	153.23	187.84	174.68	199.82	92.33	108.63	94.03	93.51	-0.77	1.23063e-12								No	No
Gatc	28.53	20.38	33.89	38.37	20.22	10.86	16.99	17.34	-0.77	0.00299415								No	No
Manbal	23.64	37.21	53.01	44.16	14.95	23.54	19.41	29.41	-0.77	0.00351721								No	No
Zbtb5	17.93	18.61	14.77	13.76	7.91	8.15	8.49	9.8	-0.77	0.00770866								No	No
Nr3c1	69.28	76.2	64.31	84.71	38.69	37.11	41.86	39.97	-0.769	1.92593e-07								No	No
Tmem259	61.95	56.71	62.57	71.67	36.05	40.74	31.54	29.41	-0.769	1.60279e-06								No	No
Kctd9	59.5	86.83	74.74	78.19	32.54	36.21	45.5	45.25	-0.769	2.41706e-06								No	No
Afg3l2	25.27	28.35	24.33	30.41	10.55	14.48	15.17	17.34	-0.769	0.000777855								No	No
Cnot9	31.79	45.19	59.97	47.06	19.35	21.73	32.76	24.13	-0.769	0.00090685								No	No
Pdrg1	191.54	215.31	266.81	204.16	113.43	114.96	128.6	95.02	-0.768	2.97676e-11								No	No
Trim37	143.45	130.25	119.93	125.97	78.26	79.66	52.78	64.85	-0.768	4.96491e-09								No	No
Usp24	47.27	84.18	68.66	73.12	28.14	39.83	36.4	46	-0.768	6.09603e-05								No	No
Slc19a1	57.87	46.96	37.37	57.19	29.02	23.54	31.54	23.38	-0.768	9.73598e-05								No	No
Ngf	11.41	12.4	15.64	14.48	3.52	4.53	10.31	9.05	-0.768	0.03049								No	No
Riok1	178.5	186.07	186.85	183.17	110.8	95.95	86.14	103.31	-0.767	4.65745e-15								No	No
Parl	128.78	140	172.95	130.32	81.78	57.93	75.22	80.69	-0.767	2.40045e-09								No	No
Chchd6	32.6	32.78	37.37	39.09	21.1	16.29	24.26	12.07	-0.767	0.000638768								No	No
Dnph1	56.24	55.82	43.45	58.64	28.14	22.63	32.76	30.16	-0.766	1.19477e-05								Dnph1	No
Ngrn	40.75	44.3	44.32	39.09	20.22	27.16	12.74	27.15	-0.766	0.000380176								No	No
Mlh1	11.41	11.52	17.38	11.58	8.79	4.53	7.28	6.79	-0.766	0.025409								No	No
Adsl	68.47	60.25	67.79	71.67	32.54	19.01	44.89	37.71	-0.765	1.04346e-05								No	No
Kmt5b	49.72	41.64	27.81	44.16	19.35	35.3	23.05	18.1	-0.765	0.00141155								No	No
Mob1b	38.31	26.58	18.25	24.62	9.67	15.39	11.53	24.13	-0.765	0.0166911								No	No
Phf2	33.42	34.56	33.89	37.65	22.86	18.1	20.62	12.82	-0.764	0.000252928								No	No
Cep85l	31.79	23.92	28.68	21.72	15.83	13.58	15.17	12.07	-0.764	0.00147902								No	No
Aars	368.41	372.14	405.86	338.82	198.73	182.86	223.23	188.53	-0.763	1.81536e-20								No	No
Nsun2	382.27	362.4	350.24	380.81	185.54	211.82	219.59	129.71	-0.762	3.43909e-15								No	No
Zfand2a	14.67	8.86	16.51	17.38	9.67	6.34	3.64	11.31	-0.762	0.0491163								No	No
Cops4	113.3	132.02	86.91	97.01	52.76	57.93	58.24	55.8	-0.761	1.03797e-07								No	No
Prmt7	44.83	57.59	58.23	62.26	16.71	18.1	38.22	46.76	-0.761	0.00306692								No	No
Bid	50.53	32.78	37.37	45.61	21.1	17.2	24.26	26.39	-0.76	0.000256328								No	No
Atrip	29.34	40.76	14.77	29.68	15.83	19.01	13.35	15.84	-0.759	0.00794034								Atrip	No
Hist1h4d	16.3	14.18	15.64	15.2	11.43	4.53	6.67	10.56	-0.759	0.0152859								No	No
Arhgap10	116.56	118.73	103.42	91.22	58.92	30.78	70.37	55.05	-0.757	2.68575e-06								No	No
4921524J17Rik	47.27	45.19	57.36	62.99	30.78	38.92	25.48	24.13	-0.757	0.000120601								No	No
Ncdn	35.05	39.87	24.33	39.82	19.35	20.82	22.44	12.82	-0.757	0.00159344								No	No
[truncated: 4,615 more rows]

## Sheet: match
EnsemblGeneID	Symbol	wt1_unique	wt2_unique	wt3_unique	wt4_unique	ko1_unique	ko2_unique	ko3_unique	ko4_unique	logFC_KOvsWT	FDR_KOvsWT	Student's T-test Difference KO_WT	KO1	KO2	KO3	KO4	WT1	WT2	WT3	WT4	Student's T-test Difference KOvsWT	Gene names
ENSMUSG00000022972	1110004E09Rik	30.16	29.24	30.42	38.37	53.64	38.02	41.86	33.94	0.464	0.0211528	-1.08662	33.2351	31.6137	31.4511	32.6309	22.1838	24.4892	21.7369	22.3109	9.55247	Mme	1110004E09Rik	Mme
ENSMUSG00000054676	1600014C10Rik	3.26	4.43	3.48	2.17	14.07	10.86	15.77	14.33	2.189	1.31142e-09	3.49693	32.8012	33.46	33.1187	33.0013	25.2342	25.0601	23.6822	22.6616	8.93576	Sqrdl	1600014C10Rik	No
ENSMUSG00000030587	2200002D01Rik	0	0	0	0	39.57	38.92	38.22	46.76	8.757	1.97379e-58	1.70637	31.622	31.6504	31.6092	31.7224	24.223	22.7211	22.3511	23.3525	8.48905	Hspb1	2200002D01Rik	Hspb1
ENSMUSG00000021550	2210016F16Rik	4.08	3.54	3.48	1.45	23.74	20.82	21.23	28.66	3.029	1.53147e-19	2.19514	30.4936	30.7133	32.0762	32.0546	23.38	25.622	22.9334	23.6942	7.42698	Cnn1	2210016F16Rik	Cnn1
ENSMUSG00000021185	9030617O03Rik	1.63	0.89	0.87	2.17	21.1	28.06	36.4	30.16	4.392	7.88608e-29	3.53914	31.2166	31.9968	31.48	31.711	24.895	24.583	24.3022	23.3308	7.32337	Enpep	9030617O03Rik	No
ENSMUSG00000018697	Aatf	39.94	52.28	25.2	28.24	19.35	19.01	16.38	21.87	-0.711	0.00669579	-1.51027	30.7853	31.429	30.6438	31.0888	24.9997	23.0892	23.3813	24.0492	7.10691	Cth	Aatf	Cth
ENSMUSG00000057880	Abat	0.82	0	0.87	0	5.28	7.24	10.92	17.34	4.404	1.2052e-09	1.19478	31.8553	30.9633	30.7231	30.862	24.8051	26.2589	23.8579	21.7405	6.93536	Ptgis	Abat	Ptgis
ENSMUSG00000032849	Abcc4	16.3	14.18	6.08	10.86	32.54	21.73	23.66	33.18	1.316	2.38248e-06	2.36677	31.6851	31.3778	29.7469	31.0298	25.5238	23.5875	23.0162	25.2886	6.60587	Serpinb1a	Abcc4	Serpinb1a
ENSMUSG00000029802	Abcg2	56.24	47.85	32.16	31.13	65.07	66.08	71.58	73.9	0.925	6.29589e-08	1.91952	31.4977	33.3189	31.4146	31.5264	25.4667	25.3345	26.9683	23.7274	6.56518	Fam129a	Abcg2	Fam129a
ENSMUSG00000047368	Abhd17b	110.85	123.16	111.24	102.81	51	46.17	47.32	42.98	-1.124	4.66473e-20	-1.20121	30.2562	30.3072	30.3726	30.3187	23.5421	24.9474	23.7398	24.1809	6.21114	Serpine2	Abhd17b	Serpine2
ENSMUSG00000062908	Acadm	13.86	14.18	12.17	15.93	52.76	64.27	57.02	38.46	2.062	4.64288e-21	1.17712	29.5475	30.466	29.9773	30.0069	24.2509	24.0659	22.7048	24.2806	6.1739	Pdia6	Acadm	Pdia6
ENSMUSG00000030861	Acadsb	27.71	33.67	26.07	31.86	72.99	84.19	75.22	65.61	1.441	6.32781e-21	1.25622	31.6397	28.7343	28.8029	31.8124	23.9655	23.8928	24.8772	24.6546	5.89981	Lmod1	Acadsb	Lmod1
ENSMUSG00000072949	Acot1	0	0.89	3.48	0	21.1	22.63	24.87	23.38	5.269	5.3612e-29	2.80595	29.5561	29.6612	29.917	29.9915	23.0904	23.8659	23.9141	24.7688	5.87162	Emb	Acot1	Emb
ENSMUSG00000028093	Acp6	28.53	26.58	26.94	33.3	7.91	4.53	4.85	4.52	-2.284	9.74172e-17	-2.52817	29.8074	29.5144	29.3672	29.7482	24.9299	23.937	23.2548	23.5603	5.6888	Pawr	Acp6	Pawr
ENSMUSG00000032561	Acpp	0	0	0	0	13.19	9.96	13.95	13.57	7.091	9.44038e-20	4.13896	29.7382	30.3348	30.215	30.2141	23.5537	24.6787	24.7193	24.8367	5.67843	Saa3	Acpp	Saa3
ENSMUSG00000018796	Acsl1	44.01	30.13	31.29	46.33	59.8	60.65	85.53	71.64	0.997	1.90666e-08	1.40366	30.3601	30.5434	30.3324	30.444	25.8862	23.8974	24.7784	24.537	5.64524	C3	Acsl1	C3
ENSMUSG00000031278	Acsl4	37.49	40.76	46.06	48.51	90.57	117.68	112.83	131.97	1.528	1.62987e-27	1.21111	30.7097	30.4331	29.9982	30.7205	26.2355	23.3076	24.7277	25.0218	5.64223	Anpep	Acsl4	Anpep
ENSMUSG00000059430	Actg2	2.45	0.89	0	2.9	376.36	372.05	385.81	372.53	7.884	0	5.25658	30.2888	29.7054	29.8317	30.2164	23.8136	24.774	24.3475	25.1604	5.48668	Thy1	Actg2	Thy1
ENSMUSG00000015143	Actn1	911.25	891.37	955.12	765.97	561.9	521.41	535.03	598.02	-0.557	2.7305e-15	2.89846	32.5619	32.4582	32.3195	31.9421	26.6235	26.3265	27.3716	27.6334	5.33163	Nqo1	Actn1	Nqo1
ENSMUSG00000024866	Acy3	10.6	13.29	11.3	4.34	1.76	4.53	3.03	0.75	-1.818	0.000503247	-1.89393	28.2761	28.0298	28.9229	28.7161	23.9132	23.0107	22.9221	23.0725	5.25658	Actg2	Acy3	Actg2
ENSMUSG00000031555	Adam9	11.41	13.29	10.43	10.86	23.74	21.73	16.99	14.33	0.845	0.00290855	1.36718	31.1062	30.8522	31.6802	31.6993	25.8666	26.4797	25.8385	26.2262	5.23174	Tgm2	Adam9	Tgm2
ENSMUSG00000027951	Adar	54.61	36.33	38.24	44.16	8.79	7.24	10.31	11.31	-2.038	1.7327e-17	-1.17491	31.9874	32.3001	31.8907	31.9673	26.6181	27.059	26.6873	27.057	5.18103	Rbp1	Adar	Rbp1
ENSMUSG00000019808	Adat2	44.83	38.1	45.19	34.75	6.16	5.43	6.67	9.8	-2.372	2.99925e-22	-2.09859	30.1892	30.6203	30.3485	29.9801	28.1863	24.9875	23.6237	23.8923	5.11205	Fabp4	Adat2	Fabp4
ENSMUSG00000055301	Adh7	231.48	263.16	261.59	228.05	0	0	0.61	1.51	-8.426	1.21022e-246	-3.15677	28.7569	28.8051	28.4044	28.5386	22.165	23.1092	24.3025	24.6244	5.07598	Cald1	Adh7	Cald1
ENSMUSG00000020629	Adi1	49.72	31.9	60.84	35.48	14.95	4.53	10.31	12.07	-1.862	1.16116e-10	-1.4051	28.4381	29.2278	28.9769	29.3584	23.7043	23.1582	24.0064	24.9236	5.05217	Pkp2	Adi1	Pkp2
ENSMUSG00000020473	Aebp1	363.52	445.69	338.07	378.64	677.09	794.79	747.35	663.62	1.079	5.96073e-38	2.24551	29.1357	28.906	28.0661	28.6287	23.3094	24.9886	23.2757	23.0108	5.03797	Ugt1a6;Ugt1a6b;Ugt1a6a;Ugt1a10;Ugt1a7c;Ugt1a5;Ugt1a8;Ugt1a9;Ugt1a2;Ugt1a1	Aebp1	No
ENSMUSG00000031521	Aga	7.34	18.61	33.02	28.24	49.24	65.18	64.3	45.25	1.369	4.86229e-08	1.17999	29.2139	29.2266	28.0629	29.5117	24.3168	24.0426	24.8985	23.3873	4.84248	Gas1	Aga	Gas1
ENSMUSG00000034254	Agpat1	53.79	69.11	56.49	52.85	32.54	44.36	44.28	37.71	-0.398	0.0180573	-1.45301	28.6158	28.9582	26.7879	28.599	23.246	24.2893	22.9839	23.1356	4.82653	Dcxr	Agpat1	Dcxr
ENSMUSG00000072812	Ahnak2	86.4	88.61	95.6	92.67	166.2	164.75	155.29	168.17	0.974	4.74179e-25	1.33923	29.1209	29.4517	27.9763	28.3673	25.0798	23.0996	24.4938	22.9514	4.82293	Steap4	Ahnak2	Steap4
ENSMUSG00000024782	Ak3	48.09	46.96	33.02	41.99	72.11	77.85	72.19	73.15	0.911	4.53173e-11	1.08578	28.1838	28.6473	28.5071	28.2008	24.4836	22.62	23.6643	23.5293	4.81044	Cxcl12	Ak3	Cxcl12
ENSMUSG00000002625	Akap8l	79.06	74.43	70.4	76.02	16.71	20.82	22.44	23.38	-1.699	3.9058e-29	-1.79281	30.119	29.1853	27.7922	29.0319	23.1416	22.9195	28.2755	23.2628	4.63223	Fyco1	Akap8l	Fyco1
ENSMUSG00000033715	Akr1c14	0	0.89	0	0	5.28	5.43	6.07	4.52	4.589	7.22289e-08	1.31229	27.9105	27.7155	27.7634	28.066	21.9965	23.1724	23.6861	24.4573	4.53578	Cp	Akr1c14	Cp
ENSMUSG00000028393	Alad	77.43	69.11	66.92	98.46	17.59	24.44	24.26	25.64	-1.588	3.00144e-18	-1.26241	30.5158	31.1385	30.4529	30.9422	25.5937	23.8773	27.864	27.689	4.50635	Ifi205a	Alad	No
ENSMUSG00000022636	Alcam	136.93	142.66	190.33	141.18	4.4	3.62	4.25	1.51	-5.255	2.57135e-116	-4.15978	31.8506	31.9486	31.5434	31.2668	27.1472	27.7277	27.3576	26.3961	4.49522	Ldhb	Alcam	Ldhb
ENSMUSG00000029455	Aldh2	93.73	101.01	90.38	105.7	180.26	219.07	236.58	205.12	1.242	2.07851e-34	1.45612	28.2046	27.9439	28.289	28.4082	24.0915	22.9517	23.7633	24.264	4.44379	Synpo	Aldh2	Synpo
ENSMUSG00000005686	Ampd3	6.52	5.32	1.74	0.72	8.79	6.34	7.89	6.03	1.177	0.0196526	1.89932	27.5307	29.2128	30.2655	28.1935	23.9097	23.9929	25.7014	23.8474	4.43778	Rbm15b	Ampd3	Rbm15b
ENSMUSG00000069601	Ank3	22.82	27.47	20.86	22.44	181.14	175.61	171.07	157.61	2.999	8.17253e-116	1.03351	28.095	27.8477	28.038	28.8506	23.3777	22.5996	24.0564	25.4325	4.34126	Col2a1	Ank3	Col2a1
ENSMUSG00000039062	Anpep	1.63	1.77	0	0.72	7.03	6.34	8.49	9.05	2.949	4.31107e-08	5.64223	28.4822	27.6488	27.3142	27.3899	22.7711	23.3004	23.9744	24.072	4.17931	Tpm1	Anpep	Tpm1
ENSMUSG00000033420	Antxr1	17.12	11.52	18.25	21	49.24	67.89	75.83	63.35	2.04	1.19887e-24	1.35598	27.7235	27.7965	27.5746	27.7689	23.7509	22.7849	24.6025	23.1695	4.13896	Acpp	Antxr1	Acpp
ENSMUSG00000024659	Anxa1	66.02	83.29	77.35	56.47	187.3	245.32	288.75	249.61	1.939	3.29336e-51	1.78813	27.3469	27.3525	27.4751	27.6321	23.5933	24.5342	22.8935	22.3592	4.10664	Ppp1r12b	Anxa1	Ppp1r12b
ENSMUSG00000018340	Anxa6	154.86	160.38	140.79	151.31	701.71	736.86	721.87	588.21	2.339	5.32387e-176	1.44824	31.1967	31.2626	31.1834	31.3612	27.8266	26.9793	26.7701	27.0446	4.09579	Bcat1	Anxa6	Bcat1
ENSMUSG00000021814	Anxa7	14.67	16.84	22.6	9.41	32.54	38.02	36.4	46.76	1.434	1.12197e-09	1.26216	29.1162	28.5729	28.3009	28.9129	24.3291	24.5662	23.8641	25.8774	4.06651	Cryab	Anxa7	Cryab
ENSMUSG00000063558	Aox1	0	0	0	0	7.03	5.43	8.49	7.54	6.283	2.31449e-12	1.78253	30.9883	31.288	31.0609	31.374	27.3853	27.4926	26.7873	26.8175	4.05712	Gnao1	Aox1	Gnao1
ENSMUSG00000004931	Apba3	21.19	19.49	19.99	15.2	4.4	5.43	6.07	9.8	-1.4	4.77507e-06	-1.55067	27.5707	28.1388	27.8708	27.9527	24.3522	23.5816	24.3588	23.0704	4.04248	Lcn2	Apba3	Lcn2
ENSMUSG00000026786	Apbb1ip	35.86	38.1	34.76	25.34	116.95	96.86	117.08	153.84	1.955	6.65695e-33	1.6924	32.4473	32.9489	32.4881	32.6196	28.7596	28.5145	28.692	28.4774	4.01514	Cbr2	Apbb1ip	Cbr2
ENSMUSG00000031996	Aplp2	215.99	196.7	194.67	229.5	328.87	381.1	355.48	371.78	0.906	6.05559e-33	1.6598	29.5243	30.4557	29.9183	30.0392	26.5569	24.998	26.5271	25.8375	4.00449	Cbr3	Aplp2	Cbr3
ENSMUSG00000057346	Apol9a	124.71	129.36	108.63	149.86	14.07	18.1	12.13	12.82	-3.052	5.61305e-67	-3.28768	31.2054	31.3032	31.8554	31.5863	27.4924	27.8069	26.7864	27.8516	4.00324	Fhl1	Apol9a	Fhl1
ENSMUSG00000018481	Appbp2	69.28	88.61	70.4	79.64	27.26	44.36	30.94	28.66	-1.166	2.03439e-12	-1.15938	27.6559	27.039	26.7125	27.3324	22.7553	22.9413	23.5257	23.6361	3.97038	Mettl7a1	Appbp2	Mettl7a1
ENSMUSG00000054277	Arfgap3	16.3	13.29	17.38	20.27	93.21	81.47	83.71	81.44	2.444	1.38389e-51	1.08306	28.6261	28.6114	29.2388	28.3924	26.8614	23.4532	24.832	23.8677	3.96362	Ptgs1	Arfgap3	Ptgs1
ENSMUSG00000058230	Arhgap35	26.08	27.47	36.5	37.65	43.09	52.5	34.58	51.28	0.627	0.00229434	2.13422	29.3961	28.7592	27.9423	29.7924	23.7474	25.0482	25.3828	26.0045	3.92677	Egfr	Arhgap35	Egfr
ENSMUSG00000030220	Arhgdib	37.49	32.78	19.99	28.96	202.25	218.16	212.32	200.6	2.889	4.42778e-130	2.37858	27.0331	27.1471	27.1997	27.3937	23.027	24.0582	22.7197	23.3367	3.90798	Mmp2	Arhgdib	Mmp2
ENSMUSG00000004562	Arhgef40	13.04	30.13	19.12	18.1	43.09	27.16	37	29.41	0.997	9.42761e-05	1.32482	27.6982	28.2452	27.3046	27.9737	22.7733	24.6387	23.9913	24.2954	3.88073	Kctd12	Arhgef40	Kctd12
ENSMUSG00000007880	Arid1a	90.47	64.68	75.61	75.29	33.41	33.49	29.72	39.97	-1.041	3.74128e-11	-1.98454	27.4872	27.3997	27.1326	27.4218	23.7023	23.9395	23.5207	22.806	3.8682	Mgp	Arid1a	Mgp
ENSMUSG00000039043	Arpin	8.15	9.75	14.77	4.34	14.95	14.48	13.95	15.84	0.875	0.00859711	1.59515	27.6049	27.7355	27.3671	27.3498	22.9935	24.1963	23.3735	24.1851	3.82724	Dak	Arpin	No
ENSMUSG00000017550	Atad5	125.52	130.25	131.23	89.77	44.85	49.79	44.89	38.46	-1.33	6.39069e-20	-1.79846	29.4734	29.8562	28.818	29.3219	24.1609	26.2543	25.7924	25.9711	3.82267	Ckb	Atad5	Ckb
ENSMUSG00000037204	Atg101	109.22	77.09	94.73	82.53	91.45	118.58	109.19	109.35	0.387	0.00241126	1.38815	30.418	27.9151	28.0471	28.2738	25.6565	22.6888	25.9183	25.1387	3.8129	Lmo7	Atg101	Lmo7
ENSMUSG00000024759	Atl3	34.23	34.56	39.11	25.34	51.88	47.98	49.74	52.79	0.738	7.77083e-06	1.01059	27.3793	27.865	27.7995	27.3297	24.5652	23.8444	22.8151	24.1767	3.74299	Ltbp2	Atl3	Ltbp2
ENSMUSG00000034218	Atm	153.23	157.72	172.08	175.93	129.26	85.09	80.07	88.23	-0.778	4.01297e-11	-1.50039	28.2987	28.1408	27.3564	28.6686	24.8502	23.4257	25.2629	24.4048	3.63022	Ly6a	Atm	Ly6a
ENSMUSG00000026576	Atp1b1	21.19	16.84	15.64	22.44	73.86	49.79	75.83	67.87	1.957	5.8433e-25	2.34241	26.8954	26.9007	26.414	27.3102	22.51	23.3261	23.098	24.2175	3.59214	Foxc1	Atp1b1	Foxc1
ENSMUSG00000026463	Atp2b4	8.97	15.95	6.08	7.96	78.26	66.99	66.73	105.58	3.216	1.73967e-38	1.40412	27.4556	27.2443	27.2036	28.1278	23.0697	25.6375	24.7331	22.3197	3.56784	Tmem59	Atp2b4	Tmem59
ENSMUSG00000031007	Atp6ap2	185.02	201.14	203.36	222.99	144.21	134.88	136.49	147.05	-0.403	1.32085e-05	-1.50631	27.6662	28.5053	29.2603	28.2293	27.4062	25.4993	22.8332	23.7422	3.54506	Il1f10	Atp6ap2	No
ENSMUSG00000025646	Atrip	29.34	40.76	14.77	29.68	15.83	19.01	13.35	15.84	-0.759	0.00794034	2.40242	32.8052	33.0998	32.9846	33.2484	29.454	29.7578	30.084	28.6798	3.54062	Col12a1	Atrip	Col12a1
ENSMUSG00000021460	Auh	14.67	10.63	25.2	27.51	31.66	40.74	29.72	35.44	0.903	0.000458604	1.25364	27.252	27.5541	27.4049	27.3736	24.319	23.6122	23.1021	24.3946	3.53914	9030617O03Rik	Auh	9030617O03Rik
ENSMUSG00000060802	B2m	1648.08	1643.64	1697.31	1650.68	1020.03	1066.36	1097.97	950.19	-0.536	9.14638e-29	-1.46848	28.4492	26.5364	27.2135	26.7493	23.2027	24.1546	24.1678	23.4112	3.50304	Rbpms	B2m	Rbpms
ENSMUSG00000042215	Bag2	2.45	8.86	8.69	13.03	14.07	8.15	18.2	21.12	0.957	0.0170682	1.19286	30.2127	29.4791	29.6602	30.1218	26.8258	26.8146	26.7729	25.0536	3.50173	Sorbs1	Bag2	Sorbs1
ENSMUSG00000030847	Bag3	29.34	29.24	28.68	24.62	80.9	68.8	70.37	85.22	1.579	1.66193e-24	1.13375	26.8457	26.9162	26.6047	26.5136	24.2033	23.9576	22.5973	22.1342	3.49693	1600014C10Rik	Bag3	1600014C10Rik
ENSMUSG00000035021	Baz1a	251.86	264.93	277.24	262.81	118.71	136.69	133.46	131.97	-0.887	1.08099e-27	-1.28643	28.1229	28.2227	27.8803	26.5995	24.1077	25.6176	23.7193	23.4141	3.49167	Mgst1	Baz1a	Mgst1
ENSMUSG00000030780	BC017158	4.08	10.63	7.82	10.14	14.95	11.77	17.59	15.84	0.996	0.00172721	3.01065	28.3985	29.6171	29.6259	28.4488	26.0531	23.2819	26.3866	26.4271	3.48542	Mustn1	BC017158	Mustn1
ENSMUSG00000030268	Bcat1	191.54	198.48	206.84	218.64	104.64	95.05	95.85	74.66	-0.987	8.22901e-22	4.09579	29.1759	28.4157	27.463	28.3791	23.4153	24.1943	26.2175	25.7729	3.4584	Fmo1	Bcat1	Fmo1
ENSMUSG00000026172	Bcs1l	12.23	23.04	15.64	18.82	22.86	17.2	24.26	33.18	0.61	0.0273915	1.06914	28.1113	26.9499	26.6803	26.8404	23.2065	23.3493	25.559	22.8019	3.41631	Cyp1b1	Bcs1l	Cyp1b1
ENSMUSG00000014329	Bicc1	52.16	64.68	84.3	83.26	282.27	290.58	310.59	303.91	2.136	7.57173e-104	2.18529	31.1851	31.205	30.5122	31.5493	27.3797	28.5189	28.2447	26.8327	3.36891	Myl9	Bicc1	Myl9
ENSMUSG00000040466	Blvrb	17.93	23.92	27.81	21	25.5	26.25	35.79	37.71	0.623	0.00514965	1.11241	27.4126	27.0106	27.3154	27.4753	24.4544	23.4641	24.3697	23.5973	3.33206	Sgcd	Blvrb	Sgcd
ENSMUSG00000023175	Bsg	332.55	288.85	322.43	274.39	202.25	158.41	175.31	196.07	-0.603	6.41272e-11	-2.33081	27.0587	26.9477	25.5592	26.7356	23.1168	22.4237	23.845	23.6035	3.32803	Hspb6	Bsg	Hspb6
ENSMUSG00000046718	Bst2	145.9	171.9	172.95	199.09	94.97	84.19	83.71	73.9	-0.914	1.65764e-14	-1.58952	30.2037	30.158	29.7461	30.3555	26.2452	27.6103	27.7055	25.6297	3.31815	Rnpep	Bst2	Rnpep
ENSMUSG00000038722	Bud31	170.35	157.72	205.97	156.38	80.02	65.18	66.12	87.48	-1.052	1.49937e-17	-1.16719	29.85	30.4113	29.399	30.5277	26.1253	27.1554	27.9838	26.178	3.1864	Tln2	Bud31	Tln2
ENSMUSG00000024164	C3	36.68	48.73	49.54	55.75	172.35	190.1	178.34	168.92	1.994	9.97641e-69	5.64524	29.0979	28.2396	27.8258	28.7803	25.3042	25.4233	26.0649	24.5315	3.15491	Tmem176b	C3	Tmem176b
ENSMUSG00000029761	Cald1	1367.69	1351.24	1417.47	1555.83	2416.43	2613.39	2435.56	2402.62	0.936	8.76901e-65	5.07598	28.8704	28.9346	28.8905	29.1769	26.7988	23.9202	26.1851	26.3681	3.15004		Cald1	No
ENSMUSG00000021820	Camk2g	22.01	20.38	17.38	30.41	65.07	64.27	78.86	58.82	1.72	1.6674e-20	1.27022	26.2713	26.1381	25.8992	26.4467	23.1556	21.677	23.9061	23.63	3.09661	Jak2	Camk2g	Jak2
ENSMUSG00000031628	Casp3	48.09	56.71	48.67	38.37	114.31	93.24	104.34	110.1	1.277	4.78129e-22	1.14938	27.4989	27.355	26.9002	27.23	23.6328	23.8481	23.7292	25.4807	3.07331	Prrx2	Casp3	Prrx2
ENSMUSG00000027187	Cat	13.04	9.75	20.86	15.2	40.45	30.78	42.46	38.46	1.535	6.29641e-12	1.02373	26.8714	27.0261	25.9603	26.9437	22.4931	24.0913	23.9862	23.9641	3.06667	Rab32	Cat	Rab32
ENSMUSG00000025150	Cbr2	38.31	25.7	18.25	41.27	1126.44	1149.64	1070.07	981.86	5.188	0	4.01514	26.724	26.6334	26.2539	26.4703	23.6232	24.1121	23.9296	22.1999	3.05419	Pcbd2	Cbr2	Pcbd2
ENSMUSG00000022947	Cbr3	5.71	3.54	4.35	7.24	28.14	28.06	33.97	41.48	2.75	4.62236e-22	4.00449	26.6231	27.7542	26.8295	27.3442	24.1193	23.1954	24.1774	24.8562	3.0507	Npepl1	Cbr3	Npepl1
ENSMUSG00000019659	Ccdc12	8.15	6.2	6.08	2.17	17.59	17.2	15.17	21.87	1.756	1.20602e-07	-1.03851	26.3676	26.7439	26.013	26.0639	22.7942	23.325	23.4562	23.4823	3.03271	Cd248	Ccdc12	Cd248
ENSMUSG00000021548	Ccnh	44.83	54.05	56.49	47.06	22.86	31.68	26.08	41.48	-0.647	0.000881548	-1.0406	29.7148	28.3427	27.9974	28.6959	25.6074	25.728	25.6098	25.7208	3.02122	Gpc4	Ccnh	No
ENSMUSG00000011960	Ccnt1	198.88	237.46	210.32	238.19	115.19	150.27	111.01	98.04	-0.839	9.78269e-14	-1.0015	26.0283	25.8547	25.9925	26.0187	22.7155	24.7927	22.898	21.4454	3.01065	BC017158	Ccnt1	BC017158
ENSMUSG00000046186	Cd109	17.93	15.06	16.51	17.38	27.26	34.4	24.87	21.12	0.78	0.00103258	-1.05948	28.9053	27.9781	28.5843	27.9484	25.3607	26.1198	26.3942	23.6041	2.98428	Cspg4	Cd109	Cspg4
ENSMUSG00000051439	Cd14	2.45	0	0.87	0	11.43	16.29	22.44	12.82	4.651	4.08168e-15	1.76012	29.0879	28.8805	27.7618	28.6675	26.2286	24.7525	25.1341	26.4719	2.95264	Ppap2b	Cd14	No
ENSMUSG00000056481	Cd248	4.08	8.86	2.61	3.62	110.8	81.47	95.24	86.72	4.546	3.63949e-76	3.03271	27.7621	28.4778	28.17	28.4527	25.7977	23.7117	25.7365	25.8749	2.93545	Papss2	Cd248	Papss2
ENSMUSG00000037706	Cd81	122.26	124.05	114.72	116.56	244.46	263.42	266.3	258.66	1.246	1.49044e-53	2.3019	28.8375	28.366	27.4743	28.8464	25.7529	25.5944	26.5387	24.0037	2.90861	P2rx4	Cd81	P2rx4
ENSMUSG00000028755	Cda	0	0	0	0	15.83	28.06	14.56	27.15	7.817	7.70718e-23	1.97749	26.6777	26.3871	26.5383	27.5707	22.624	24.6626	25.827	22.4604	2.89997	Tgfbr3	Cda	Tgfbr3
ENSMUSG00000028873	Cdca8	145.08	134.68	145.14	143.35	62.43	87.81	72.19	75.41	-0.82	7.60873e-15	-1.16571	26.7839	25.7629	25.7782	26.5594	23.3264	22.0868	23.7497	24.1278	2.89846	Actn1	Cdca8	Actn1
ENSMUSG00000031673	Cdh11	107.59	99.24	107.77	122.35	309.53	343.08	361.54	378.57	1.8	3.21502e-96	1.59047	30.2991	30.3382	29.6936	30.6213	28.1387	25.6466	28.0935	27.4804	2.89826	Fam3c	Cdh11	Fam3c
ENSMUSG00000024304	Cdh2	68.47	62.02	70.4	65.16	12.31	11.77	7.28	10.56	-2.569	5.43081e-43	-2.9487	26.2298	27.3465	26.6278	26.9797	23.4818	24.4171	25.7136	22.1499	2.8554	Macrod1	Cdh2	Macrod1
ENSMUSG00000003031	Cdkn1b	167.91	166.58	217.27	160	87.93	75.13	82.5	104.82	-0.856	1.70116e-12	2.49621	27.7207	27.6915	28.267	28.494	24.9179	23.8824	26.3185	25.6451	2.85233	Vcan	Cdkn1b	Vcan
ENSMUSG00000044303	Cdkn2a	561.59	557.33	603.14	555.29	21.1	13.58	10.31	20.36	-4.963	0	-5.67928	27.3544	27.5814	27.6158	27.8635	25.3644	24.9449	24.2027	24.6731	2.80747	Prune2	Cdkn2a	Prune2
ENSMUSG00000056501	Cebpb	136.12	93.92	107.77	97.74	117.83	119.49	148.62	131.22	0.435	0.000438828	1.43856	26.9418	27.0728	26.7212	26.5261	23.5879	24.0201	24.2366	24.1935	2.80595	Acot1	Cebpb	Acot1
ENSMUSG00000024081	Cebpz	312.17	344.68	325.9	373.57	171.47	172.9	163.79	174.96	-0.86	7.38595e-26	-1.08161	27.2683	27.7788	27.1624	27.3319	23.5763	24.9157	25.6915	24.2335	2.78109	Scrn1	Cebpz	Scrn1
ENSMUSG00000023021	Cers5	147.53	158.6	123.41	150.59	92.33	89.62	90.39	88.99	-0.566	1.08796e-07	-1.16341	28.7992	28.9293	27.8974	28.0631	25.6107	25.9554	25.8656	25.1504	2.77671	Pbxip1	Cers5	Pbxip1
ENSMUSG00000002835	Chaf1a	134.49	122.28	113.85	144.8	58.04	59.75	52.17	55.8	-1.074	8.72457e-19	-1.13587	27.1308	27.2428	26.9586	27.1351	24.9395	24.0831	23.5109	24.8992	2.75864	Gfpt2	Chaf1a	Gfpt2
ENSMUSG00000018474	Chd3	140.19	167.46	147.74	149.14	348.22	383.82	378.53	374.8	1.431	4.31547e-82	1.06973	32.5554	32.5533	32.3698	32.2802	29.8514	29.5201	29.6964	29.7192	2.74287	Ephx1	Chd3	Ephx1
ENSMUSG00000025512	Chid1	16.3	8.86	14.77	21.72	29.9	33.49	47.32	41.48	1.42	7.1591e-09	1.04163	26.0635	25.8539	25.6034	25.8816	22.9399	23.8963	22.4993	23.1703	2.72412	Pid1	Chid1	Pid1
ENSMUSG00000032640	Chsy1	20.38	19.49	22.6	22.44	58.92	53.41	58.84	60.33	1.573	4.07611e-23	1.18213	26.3426	25.4369	25.4071	25.7762	23.0017	24.6047	22.4714	21.9963	2.72219	Slc44a2	Chsy1	No
ENSMUSG00000001270	Ckb	0.82	0.89	0	0.72	18.47	9.96	10.31	11.31	4.205	5.02752e-13	3.82267	30.1354	30.6931	30.0069	30.858	27.8475	27.6723	28.8173	26.6468	2.67739	Leprel2;P3h3	Ckb	No
ENSMUSG00000047547	Cltb	33.42	38.99	41.72	40.54	72.11	62.46	58.24	53.54	0.784	9.8183e-07	1.31377	28.9403	29.5093	29.5635	29.4392	26.9877	26.1976	26.8193	26.8657	2.64548	Prkcdbp	Cltb	No
ENSMUSG00000014633	Cmc2	44.83	40.76	33.89	32.58	65.07	84.19	63.09	66.36	0.98	1.00699e-09	1.07279	28.745	27.476	27.175	27.4503	25.5932	23.3155	25.3482	26.0554	2.6335	Sestd1	Cmc2	Sestd1
ENSMUSG00000022748	Cmss1	45.64	31.9	37.37	41.27	13.19	6.34	5.46	11.31	-2.033	2.26359e-15	-3.0689	28.1538	28.2711	26.8515	28.9471	25.6845	24.8296	25.8245	25.3925	2.62311	Aarsd1;Gm27029	Cmss1	No
ENSMUSG00000024019	Cmtr1	79.06	75.31	77.35	80.36	14.07	7.24	20.62	6.03	-2.669	3.70579e-38	-1.07045	28.7906	29.2125	28.6433	30.9211	26.8247	26.6656	26.7129	27.0099	2.58861	Nqo2	Cmtr1	Nqo2
ENSMUSG00000001349	Cnn1	0	4.43	0.87	0	108.16	129.45	119.5	94.26	7.576	9.25647e-105	7.42698	27.3539	26.9356	26.1309	27.2263	25.3602	24.8323	23.209	23.9277	2.57939	Il1rn	Cnn1	Il1rn
ENSMUSG00000032332	Col12a1	8.97	7.09	10.43	2.17	155.64	162.04	162.57	157.61	4.506	1.34262e-164	3.54062	29.416	29.1352	28.8795	29.3054	26.5786	26.8679	26.9051	26.331	2.51338	Crlf1	Col12a1	Crlf1
ENSMUSG00000022371	Col14a1	0	0	0	0	18.47	17.2	14.56	23.38	7.604	3.14553e-24	1.20107	29.277	28.8958	28.8156	28.9981	26.5318	26.6016	26.5224	26.29	2.51017	Plcd1	Col14a1	Plcd1
ENSMUSG00000001435	Col18a1	0.82	4.43	6.95	9.41	30.78	23.54	28.51	27.15	2.358	7.60873e-15	2.08101	26.47	26.3198	25.7577	26.6393	23.59	23.225	24.9177	23.4693	2.49621	Cdkn1b	Col18a1	Cdkn1b
ENSMUSG00000001506	Col1a1	802.85	863.91	842.14	815.93	2498.21	2299.28	2746.75	2344.56	1.695	4.65599e-170	1.1891	26.4628	26.3434	26.5097	26.9247	23.7	25.0936	24.7463	22.8431	2.46439		Col1a1	No
ENSMUSG00000029661	Col1a2	1182.67	1205.04	1214.97	1141.72	3428.55	3238	3367.32	3220.84	1.614	7.27085e-286	1.0275	25.4774	25.3153	25.5566	26.0411	24.4476	21.97	21.9018	24.2433	2.45696	Cpne8	Col1a2	Cpne8
ENSMUSG00000022483	Col2a1	0	0	0	0.72	295.46	292.39	314.23	310.7	10.085	0	4.34126	27.3083	27.306	26.6933	27.4417	24.2145	25.0454	25.1496	24.525	2.45372	Cpe	Col2a1	Cpe
ENSMUSG00000026043	Col3a1	43.2	53.16	24.33	41.99	750.08	640.9	720.66	693.04	4.177	0	1.63917	25.2686	26.3304	25.6995	25.7523	23.5458	23.9524	22.6103	23.256	2.42155	C1s1;C1sa	Col3a1	No
ENSMUSG00000026837	Col5a1	112.48	118.73	122.54	105.7	242.7	252.56	247.5	221.71	1.204	7.3894e-42	2.11842	26.6285	27.6134	26.9369	27.3962	23.1498	25.6604	26.0708	24.0151	2.41972	Mxra8	Col5a1	Mxra8
ENSMUSG00000068196	Col8a1	216.81	214.43	195.54	195.47	127.5	143.03	145.59	136.5	-0.437	7.34424e-07	-1.88719	27.1792	27.0097	26.6223	26.1747	24.6751	23.1442	24.7814	24.7381	2.41175	Adgrg2;Gpr64	Col8a1	No
ENSMUSG00000031827	Cotl1	88.03	98.35	121.67	101.36	29.02	29.87	31.54	34.69	-1.556	2.28731e-25	-1.95393	26.556	26.6188	26.1131	26.6363	22.9387	22.6207	25.2758	25.4632	2.40643	Selo	Cotl1	No
ENSMUSG00000003617	Cp	3.26	8.86	9.56	15.2	166.2	162.04	150.44	141.02	4.161	7.37541e-112	4.53578	26.7552	24.6402	25.7084	26.3188	22.5723	25.6512	22.8282	22.7613	2.40242	Atrip	Cp	Atrip
ENSMUSG00000037852	Cpe	85.58	74.43	81.69	109.32	367.56	319.55	354.26	371.03	2.181	3.57124e-111	2.45372	32.1264	32.3364	32.2331	32.3395	29.8265	29.572	30.0802	30.0423	2.37858	Arhgdib	Cpe	Arhgdib
ENSMUSG00000052560	Cpne8	16.3	4.43	13.91	7.24	44.85	60.65	43.07	47.51	2.346	4.28799e-20	2.45696	26.3088	25.6044	25.941	25.5874	25.0519	24.0319	22.5218	22.3256	2.37764	Slc11a2	Cpne8	Slc11a2
ENSMUSG00000041781	Cpsf2	154.05	160.38	177.29	173.03	73.86	75.13	85.53	69.38	-0.989	9.9711e-22	-1.11984	26.6369	26.9104	26.1826	26.6461	23.8381	24.7343	24.3125	23.994	2.3743	Prcp	Cpsf2	No
ENSMUSG00000024900	Cpt1a	27.71	21.27	19.12	20.27	24.62	40.74	41.86	39.21	0.896	2.58459e-05	1.67492	27.0175	26.9502	26.2413	27.2365	25.5071	23.2309	26.0686	23.1552	2.37093	Ndufb2	Cpt1a	Ndufb2
ENSMUSG00000032291	Crabp1	385.53	374.8	407.6	364.16	4.4	7.24	2.43	7.54	-6.007	0	-11.8529	27.3644	27.4906	26.6767	27.4622	25.3029	24.7992	25.3956	24.0292	2.36677	Abcc4	Crabp1	Abcc4
ENSMUSG00000006360	Crip1	2.45	3.54	0.87	1.45	32.54	19.01	33.36	30.92	3.917	5.99475e-26	1.37434	28.2407	28.4996	28.5929	28.3688	26.1515	26.7783	26.6123	24.7686	2.34784	A2m	Crip1	No
ENSMUSG00000006356	Crip2	90.47	120.5	83.43	102.08	16.71	5.43	4.25	15.08	-3.236	2.47055e-38	-5.69303	26.8059	26.9604	27.2024	26.8002	24.8172	24.5796	24.6177	24.3846	2.34241	Atp1b1	Crip2	Atp1b1
ENSMUSG00000007888	Crlf1	22.82	13.29	28.68	15.93	174.11	170.18	181.38	176.46	3.322	9.60105e-137	2.51338	32.4775	32.4284	32.3621	32.3449	30.1116	30.1245	30.2192	29.8575	2.32503	Fn1	Crlf1	Fn1
ENSMUSG00000032060	Cryab	11.41	13.29	13.04	12.31	72.11	60.65	103.73	100.3	2.911	1.63062e-39	4.06651	25.9461	26.5303	28.6173	25.8736	24.4762	24.0903	25.7105	23.4239	2.31657	Emc4	Cryab	No
ENSMUSG00000023044	Csad	26.9	28.35	24.33	22.44	48.36	59.75	71.58	59.58	1.378	4.6713e-15	1.08173	26.6581	26.6592	26.64	26.45	24.3049	22.9229	25.2846	24.6848	2.30256	Mpp2	Csad	Mpp2
ENSMUSG00000032911	Cspg4	8.97	8.86	7.82	6.52	14.95	16.29	10.92	14.33	0.915	0.00358759	2.98428	28.081	27.4598	26.2887	27.533	25.3266	23.8062	26.3815	24.6406	2.3019	Cd81	Cspg4	Cd81
ENSMUSG00000026421	Csrp1	127.15	148.86	144.27	147.69	247.97	298.73	269.94	301.65	1.107	3.70495e-36	1.39868	27.3272	27.0809	27.3509	27.8674	24.453	25.776	24.8847	25.3498	2.29073	Eya4	Csrp1	Eya4
ENSMUSG00000020186	Csrp2	47.27	50.51	56.49	55.75	113.43	106.82	102.52	104.82	1.147	1.31908e-22	1.15738	26.5468	27.3495	26.1808	27.2141	24.758	24.2442	24.995	24.1551	2.28473	Sorbs3	Csrp2	Sorbs3
ENSMUSG00000028179	Cth	38.31	28.35	44.32	21.72	7.91	16.29	24.26	13.57	-0.986	0.00178054	7.10691	30.3801	30.7148	30.3092	30.8023	28.1585	28.6187	28.2691	28.0876	2.26813	H6pd	Cth	H6pd
ENSMUSG00000021477	Ctsl	231.48	213.54	212.92	229.5	314.8	354.85	391.87	365.75	0.823	1.25698e-27	1.05452	25.5754	25.9442	26.4782	25.4685	22.9301	23.9306	24.004	23.531	2.26766	Gfra2	Ctsl	Gfra2
ENSMUSG00000025200	Cwf19l1	21.19	29.24	15.64	15.2	5.28	9.05	13.95	9.05	-0.899	0.00904893	-2.11627	27.8394	28.4868	28.1556	28.333	26.6232	25.7205	25.9486	25.4844	2.2595	Ech1	Cwf19l1	Ech1
ENSMUSG00000061353	Cxcl12	52.98	55.82	40.85	45.61	881.98	954.11	994.24	1051.24	4.446	0	4.81044	26.6836	26.6671	26.6591	26.8735	23.5982	23.5611	24.4484	26.2676	2.25201	Akr1e1;Akr1e2	Cxcl12	No
ENSMUSG00000029371	Cxcl5	501.27	507.71	604.88	500.99	1096.54	1060.93	1181.08	1112.33	1.239	1.44193e-95	1.57943	29.2425	28.254	27.3707	28.8352	26.5353	25.4084	26.8077	25.969	2.24551	Aebp1	Cxcl5	Aebp1
ENSMUSG00000024646	Cyb5a	24.45	15.95	19.99	26.06	199.61	214.54	217.17	241.32	3.445	4.86282e-160	1.71641	27.6638	27.9588	28.1809	28.2375	25.8917	26.5711	26.8081	23.7956	2.24361	Mid1	Cyb5a	No
ENSMUSG00000024087	Cyp1b1	0.82	3.54	1.74	2.9	301.61	341.27	311.19	303.91	7.191	0	3.41631	25.4686	25.6051	25.2719	25.2577	21.8943	25.1394	22.5753	23.0283	2.2415	Lrrc32	Cyp1b1	Lrrc32
ENSMUSG00000039168	Dap	33.42	30.13	61.7	28.96	243.58	241.7	287.54	302.4	3.146	9.37006e-120	1.39104	29.4967	29.4118	28.8423	29.1121	26.3117	26.7652	27.4009	27.434	2.23774	Serpinb9	Dap	Serpinb9
ENSMUSG00000029366	Dck	22.82	21.27	31.29	23.17	3.52	8.15	4.85	8.3	-1.855	5.52147e-10	-1.59276	27.8726	27.9406	26.5208	26.961	24.9349	25.3794	25.6059	24.5943	2.19514	2210016F16Rik	Dck	2210016F16Rik
ENSMUSG00000027797	Dclk1	70.1	51.39	49.54	62.26	177.63	161.13	145.59	181.74	1.634	5.11133e-39	1.10169	26.3984	26.3134	26.3503	26.6387	24.5699	24.9365	23.5499	23.9032	2.18529	Bicc1	Dclk1	Bicc1
ENSMUSG00000042462	Dctpp1	121.45	138.22	135.58	151.31	65.95	64.27	56.42	50.53	-1.087	5.62775e-19	-1.3441	27.1106	27.3894	26.8104	26.7439	25.9476	24.1592	25.2027	24.0991	2.16141	Nfatc4	Dctpp1	Nfatc4
ENSMUSG00000039450	Dcxr	10.6	12.4	4.35	11.58	86.18	81.47	100.7	78.43	3.211	6.85042e-58	4.82653	27.9425	28.1662	27.7946	28.6744	25.9039	26.5878	25.6076	25.8424	2.15902	Nit1	Dcxr	No
ENSMUSG00000074247	Dda1	71.73	51.39	68.66	55.02	80.9	64.27	90.39	84.46	0.525	0.000390964	1.80625	28.8509	29.0193	29.5382	28.3066	27.6822	26.4328	26.8056	26.2181	2.14408	Dhrs4	Dda1	Dhrs4
ENSMUSG00000053289	Ddx10	186.65	197.59	213.79	199.09	93.21	118.58	107.37	92	-0.832	1.83524e-17	-1.34484	26.894	26.5598	26.9158	26.5176	23.3051	25.6922	23.2106	26.1423	2.13422	Arhgap35	Ddx10	Arhgap35
ENSMUSG00000041645	Ddx24	434.43	401.38	393.69	432.22	306.89	298.73	339.1	299.39	-0.283	5.05558e-05	-1.26058	26.5466	27.2325	27.2897	27.1892	25.2075	25.5677	23.4922	25.5171	2.11842	Col5a1	Ddx24	Col5a1
ENSMUSG00000017999	Ddx27	163.01	164.81	159.04	162.9	57.16	98.67	73.4	81.44	-0.963	1.46227e-17	-1.01255	26.4217	26.4167	26.6181	26.9061	23.204	24.8143	24.5453	25.3804	2.10465	Kif21a	Ddx27	Kif21a
ENSMUSG00000026806	Ddx31	23.64	15.06	16.51	18.1	8.79	7.24	12.74	9.05	-0.784	0.00838054	-2.40255	29.5177	29.5978	29.9354	29.5103	27.9522	27.6806	27.1881	27.3811	2.08977	Nenf	Ddx31	No
ENSMUSG00000029504	Ddx51	19.56	17.72	14.77	18.1	16.71	0.91	4.25	3.77	-1.984	2.44968e-07	-1.18508	26.2156	26.4488	26.6171	26.239	24.6193	24.6099	23.1106	24.8566	2.08101	Col18a1	Ddx51	Col18a1
ENSMUSG00000029599	Ddx54	105.14	94.81	89.52	77.47	33.41	35.3	46.71	30.92	-1.19	7.18494e-14	-1.05763	28.3733	28.792	28.0812	28.3698	25.9674	26.2553	26.2389	26.8313	2.08083	Pgpep1	Ddx54	Pgpep1
ENSMUSG00000029389	Ddx55	39.94	38.1	52.14	41.99	15.83	22.63	27.9	9.8	-0.989	5.53842e-05	-1.76567	30.3242	30.3026	30.2458	30.3494	27.7849	28.3756	28.7913	27.9632	2.07677	Fkbp7	Ddx55	Fkbp7
ENSMUSG00000004393	Ddx56	69.28	77.97	76.48	81.81	50.12	36.21	38.82	38.46	-0.799	3.26957e-08	-1.26053	30.2321	30.2865	30.3474	30.2181	27.9799	28.1615	28.2077	28.4867	2.06206	Tubb3	Ddx56	Tubb3
ENSMUSG00000040296	Ddx58	122.26	116.07	145.14	140.45	69.47	48.88	80.07	61.84	-0.845	3.77785e-10	-1.01696	24.9287	25.1355	24.8543	25.1039	22.8762	24.0391	22.4647	22.5439	2.02464	N6amt1	Ddx58	No
ENSMUSG00000034926	Dhcr24	5.71	2.66	5.21	4.34	35.17	27.16	31.54	35.44	2.949	1.58771e-26	-1.58497	26.6683	27.2471	27.0179	27.17	25.4507	24.104	25.2965	25.2132	2.00974	Gpx7	Dhcr24	Gpx7
ENSMUSG00000022210	Dhrs4	9.78	11.52	17.38	16.65	48.36	48.88	46.71	33.94	1.803	1.37031e-15	2.14408	27.0868	26.9888	27.1263	27.3965	24.9622	23.3826	26.2116	26.0235	2.00462	Kif14	Dhrs4	Kif14
ENSMUSG00000029480	Dhx37	14.67	16.84	16.51	21	7.03	10.86	6.07	3.02	-1.306	0.00010228	-1.85086	26.0582	26.7696	25.84	26.8566	24.7576	24.5736	23.4885	24.6965	2.00208	Pbx1	Dhx37	Pbx1
ENSMUSG00000017830	Dhx58	14.67	14.18	6.95	7.24	3.52	3.62	1.21	1.51	-2.026	6.09431e-05	-2.77067	29.5791	29.4409	29.4697	29.6724	27.7763	27.6641	27.8994	26.8142	2.00204	Prrx1	Dhx58	Prrx1
ENSMUSG00000021692	Dimt1	9.78	25.7	4.35	13.03	2.64	2.72	4.25	4.52	-1.506	0.00387415	-1.04091	25.3698	25.3811	25.0751	25.2303	23.7668	24.1484	22.2421	22.8981	2.00022	Kctd15	Dimt1	Kctd15
ENSMUSG00000026209	Dnpep	26.9	22.15	26.07	28.96	119.59	161.13	182.59	135.74	2.633	1.28156e-58	1.49095	28.3689	28.0386	27.6586	27.8181	26.7138	23.8936	26.3449	26.9372	1.9987	Map1a	Dnpep	Map1a
ENSMUSG00000040658	Dnph1	56.24	55.82	43.45	58.64	28.14	22.63	32.76	30.16	-0.766	1.19477e-05	-5.40448	26.2022	25.8893	26.2589	27.1299	24.1176	24.3787	25.0617	23.9494	1.9932	Nexn	Dnph1	Nexn
ENSMUSG00000039756	Dnttip2	312.99	313.66	298.09	286.7	165.32	129.45	157.11	132.72	-0.926	1.54845e-26	-1.95227	26.4423	26.2174	23.7549	25.9561	24.1041	24.343	23.7515	22.2046	1.99188	H2-K1	Dnttip2	H2-K1
ENSMUSG00000057147	Dph6	72.54	57.59	59.1	62.26	21.98	34.4	20.02	31.67	-1.108	1.33282e-09	-2.93984	27.1598	26.5361	26.8603	26.6381	25.2833	23.4902	25.3274	25.1433	1.98753	Nid1	Dph6	Nid1
ENSMUSG00000026958	Dpp7	46.46	45.19	48.67	75.29	19.35	28.97	28.51	13.57	-1.006	3.36745e-05	-1.62469	25.4406	26.5133	25.5395	25.7907	25.1251	23.1602	23.7903	23.2605	1.98702	Gamt	Dpp7	Gamt
ENSMUSG00000027635	Dsn1	16.3	23.92	24.33	21.72	0.88	10.86	8.49	18.1	-1.026	0.00430426	-1.46141	28.5968	28.3776	27.5152	28.2353	25.3178	27.0914	26.4278	25.9511	1.98417	Nnmt	Dsn1	Nnmt
ENSMUSG00000015932	Dstn	293.43	243.67	234.65	304.07	1289.11	1414.87	1312.72	1338.56	2.442	7.20366e-248	1.00181	25.5875	25.9432	25.7255	25.911	25.0964	23.0364	23.0773	24.0472	1.97749	Cda	Dstn	Cda
ENSMUSG00000037474	Dtl	98.62	116.07	105.16	104.25	31.66	38.92	44.89	41.48	-1.281	6.53186e-23	-1.57777	30.4233	30.047	30.1	30.7537	28.2667	28.3206	28.9949	27.8611	1.97017	Fat1	Dtl	Fat1
ENSMUSG00000049502	Dtx3l	53.79	60.25	58.23	56.47	18.47	9.05	18.2	22.62	-1.521	8.30869e-17	-1.17672	24.9376	25.2172	25.2153	24.9121	24.0296	22.3847	23.3424	22.7631	1.94056	Nbr1	Dtx3l	No
ENSMUSG00000031383	Dusp9	13.04	11.52	15.64	5.79	0	0.91	2.43	5.28	-2.43	1.36561e-05	-1.8034	24.8745	25.2295	24.6837	24.711	22.8606	22.0693	23.2662	23.555	1.93692	Atg4b	Dusp9	No
ENSMUSG00000031176	Dynlt3	223.33	178.1	216.4	209.23	357.01	346.7	306.34	309.94	0.795	2.12927e-19	-2.6077	27.281	26.3451	26.8523	27.6581	23.5985	26.0494	26.0384	24.7504	1.92495	Ly6c1;Ly6c2	Dynlt3	No
ENSMUSG00000057530	Ece1	106.77	80.63	99.07	97.01	52.76	52.5	44.28	82.2	-0.716	9.30103e-06	-1.03622	27.9534	27.4782	26.8714	27.6308	25.7017	25.2358	26.7641	24.5541	1.91952	Abcg2	Ece1	Abcg2
ENSMUSG00000053898	Ech1	24.45	38.99	25.2	26.79	61.55	58.84	54.6	64.1	1.235	4.08972e-13	2.2595	28.3141	28.0605	26.4534	28.697	25.1774	26.0261	26.8516	25.7942	1.91889	Maged2	Ech1	Maged2
ENSMUSG00000028601	Echdc2	61.95	46.96	49.54	54.3	24.62	20.82	26.69	14.33	-1.124	6.34201e-09	-1.08157	25.5677	26.3018	26.7695	25.7458	23.753	23.2736	25.3281	24.3959	1.90856	Ywhab	Echdc2	Ywhab
ENSMUSG00000025465	Echs1	20.38	21.27	11.3	19.55	41.33	63.37	30.94	29.41	1.156	2.58459e-05	1.39146	26.7484	27.0859	26.0566	27.0393	25.7043	24.47	26.2319	22.9267	1.89932	Ampd3	Echs1	Ampd3
ENSMUSG00000020122	Egfr	8.15	2.66	11.3	3.62	59.8	76.04	66.12	58.82	3.6	7.07885e-49	3.92677	29.7615	30.123	29.9408	29.8508	27.8966	28.0085	27.9875	28.1925	1.89774	Slc9a3r1	Egfr	Slc9a3r1
ENSMUSG00000074364	Ehd2	38.31	43.42	51.28	49.95	247.09	324.98	290.57	233.02	2.688	1.12715e-95	1.23943	26.6248	26.4547	27.8039	26.4364	25.8392	23.3768	24.7855	25.7994	1.87972	Foxp1	Ehd2	Foxp1
ENSMUSG00000024079	Eif2ak2	102.7	84.18	115.59	118.01	28.14	39.83	32.76	23.38	-1.658	7.17056e-24	-1.22919	25.7043	25.8446	25.3472	25.5077	23.4375	23.9456	23.7708	23.7598	1.87254	P4ha3	Eif2ak2	P4ha3
ENSMUSG00000029388	Eif2b1	22.82	36.33	26.07	31.13	18.47	10.86	9.71	15.08	-1.002	0.000179412	-1.07897	25.0424	25.2226	24.2339	25.4243	21.8793	23.3114	23.9826	23.2963	1.86339	Mndal	Eif2b1	Mndal
ENSMUSG00000037174	Elf2	43.2	47.85	36.5	47.78	21.1	24.44	27.3	18.85	-0.793	3.43755e-05	-1.12988	31.9399	32.1746	32.1652	32.0951	30.4933	29.8472	30.4199	30.1875	1.8567	Thbs1	Elf2	Thbs1
ENSMUSG00000013822	Elof1	117.37	134.68	126.02	110.77	88.81	80.57	108.58	84.46	-0.299	0.016666	-1.82125	32.116	32.1924	32.3277	32.1373	30.4619	30.3047	30.4409	30.2051	1.84018	Fth1	Elof1	Fth1
ENSMUSG00000021728	Emb	4.89	5.32	1.74	1.45	133.66	162.94	158.93	159.12	5.642	1.49959e-171	5.87162	30.5933	30.6191	30.3358	30.2808	28.6916	27.71	29.0434	29.0382	1.83646	Lxn	Emb	Lxn
ENSMUSG00000022995	Enah	343.15	287.08	300.7	288.87	371.08	368.43	370.04	358.21	0.411	6.71503e-09	1.07965	28.2404	28.5532	28.4136	28.5121	26.3997	26.4111	26.6919	26.8955	1.83027	Fndc3a	Enah	Fndc3a
ENSMUSG00000035245	Eogt	18.75	15.95	19.99	18.82	21.98	41.64	35.79	26.39	0.883	0.000288894	1.46863	31.1301	31.291	31.1913	31.1702	29.3204	29.19	29.5335	29.4435	1.8238	Pycr1	Eogt	Pycr1
ENSMUSG00000029505	Ep400	61.95	73.54	71.26	80.36	32.54	44.36	35.18	42.23	-0.775	4.73547e-07	-2.25233	25.1292	25.0825	24.7077	25.088	23.6131	22.9963	22.5038	23.6179	1.81905	Phlda3	Ep400	Phlda3
ENSMUSG00000002808	Epdr1	6.52	7.97	13.04	12.31	26.38	28.06	23.66	21.12	1.417	7.13204e-08	1.71212	27.9288	28.1371	27.9387	27.8235	24.2648	26.4533	27.0589	26.7925	1.81463	Isoc2a	Epdr1	Isoc2a
ENSMUSG00000005958	Ephb3	26.08	11.52	27.81	12.31	52.76	51.6	43.07	53.54	1.527	7.15184e-11	1.11355	24.5034	25.5798	25.8326	25.2771	23.4556	24.905	23.4515	22.1265	1.81359		Ephb3	No
ENSMUSG00000038776	Ephx1	9.78	8.86	5.21	10.86	89.69	96.86	104.34	102.56	3.606	3.29853e-94	2.74287	27.3063	27.0688	27.4862	27.2681	26.2205	23.3687	25.8096	26.4784	1.81304	Palld	Ephx1	Palld
ENSMUSG00000046324	Ermp1	30.97	31.01	44.32	34.75	18.47	13.58	14.56	9.8	-1.194	4.35943e-07	-1.6392	25.3665	25.1837	25.4699	25.1118	23.3994	24.8723	22.2647	23.3705	1.80625	Dda1	Ermp1	Dda1
ENSMUSG00000021996	Esd	227.41	195.82	233.78	230.95	538.16	557.62	559.3	602.54	1.471	9.37235e-108	1.39914	36.5053	35.7898	36.6017	36.548	35.1047	34.6298	34.2443	34.3133	1.78813	Anxa1	Esd	Anxa1
ENSMUSG00000045624	Esf1	780.84	748.72	801.29	836.92	235.66	220.88	226.87	174.96	-1.713	2.92295e-116	-2.12024	26.6527	26.1648	25.7235	27.2521	23.9257	25.3846	24.4846	24.8634	1.78368	Hdgfrp3	Esf1	No
ENSMUSG00000010461	Eya4	27.71	35.44	21.73	29.68	47.48	66.99	60.66	70.13	1.228	6.24221e-12	2.29073	31.6151	31.308	30.87	31.5297	29.4388	29.3443	29.9712	29.4348	1.78346	Pdgfrb	Eya4	Pdgfrb
ENSMUSG00000029687	Ezh2	200.51	217.08	247.69	211.4	155.64	159.32	162.57	138.76	-0.367	0.000116229	-1.43738	27.5472	27.4788	26.269	27.6201	24.3296	26.5914	26.0925	24.7715	1.78253	Aox1	Ezh2	Aox1
ENSMUSG00000052397	Ezr	20.38	12.4	13.91	14.48	0	9.96	4.85	0	-2.208	7.2915e-06	-2.09149	27.8175	27.659	26.6334	27.8766	25.247	26.008	26.0235	25.6333	1.76869	Nol3	Ezr	Nol3
ENSMUSG00000038235	F11r	44.83	66.45	36.5	41.27	0	0	3.03	2.26	-4.746	1.45203e-33	-1.41755	29.2493	29.4209	29.4616	29.8662	27.4559	27.4659	28.1308	27.8794	1.76649	Slc12a2	F11r	Slc12a2
ENSMUSG00000062515	Fabp4	0.82	0	0.87	2.17	51	54.31	48.53	68.62	5.756	1.89125e-59	5.11205	28.064	27.888	28.125	28.4411	27.0967	24.6268	26.5533	27.1762	1.76631	Gcdh	Fabp4	No
ENSMUSG00000026655	Fam107b	29.34	32.78	14.77	20.27	4.4	12.67	7.89	2.26	-1.811	5.22881e-06	-1.805	30.8737	30.8459	30.8218	30.9671	28.981	29.1004	29.15	29.2214	1.76389	Lox	Fam107b	Lox
ENSMUSG00000026483	Fam129a	10.6	8.86	4.35	6.52	109.04	130.35	105.55	98.04	3.968	1.33176e-85	6.56518	24.9172	25.23	26.1662	25.1192	24.4297	23.1571	24.0075	22.7875	1.76269	Ptprk	Fam129a	Ptprk
ENSMUSG00000029672	Fam3c	35.05	33.67	55.62	34.75	109.92	144.84	145.59	133.48	1.978	2.34136e-42	2.89826	25.9315	25.5382	23.9673	25.5895	23.8571	22.8192	23.3335	23.9763	1.76012	Cd14	Fam3c	Cd14
ENSMUSG00000025555	Farp1	36.68	31.9	38.24	39.09	43.97	47.07	55.81	58.82	0.634	7.9324e-05	1.14449	24.922	25.5494	24.9211	25.8408	24.0308	24.0439	21.8899	24.268	1.7502	Tbc1d2b	Farp1	Tbc1d2b
ENSMUSG00000034066	Farp2	8.97	7.09	2.61	10.14	2.64	0	3.64	4.52	-1.175	0.0382574	-1.81425	26.2614	25.8812	25.8982	26.3055	24.8716	23.4149	25.2973	23.7637	1.74968	Uri1	Farp2	Uri1
ENSMUSG00000024778	Fas	4.89	5.32	4.35	1.45	27.26	42.55	26.69	39.21	3.202	5.07914e-22	1.0705	33.1159	32.8166	32.1647	33.0843	30.7853	31.3602	31.3315	30.7146	1.7475	Rcn3	Fas	Rcn3
ENSMUSG00000070047	Fat1	16.3	15.95	23.47	15.2	48.36	80.57	50.35	63.35	1.844	3.34693e-17	1.97017	25.917	25.9374	25.4449	25.8152	23.7154	23.2834	24.2307	24.918	1.74175	Arsa	Fat1	No
ENSMUSG00000027204	Fbn1	83.14	98.35	96.47	81.81	171.47	175.61	229.91	199.84	1.234	2.5189e-28	1.06697	25.3471	25.5226	25.5546	25.1699	23.7751	22.7444	22.7715	25.3711	1.73302	Ppp1r12c	Fbn1	Ppp1r12c
ENSMUSG00000059743	Fdps	13.86	13.29	10.43	18.82	74.74	57.03	83.71	51.28	2.359	1.30599e-24	-1.01534	34.0996	33.8641	34.0905	34.1869	32.4127	32.1023	32.5282	32.2693	1.73213	Tpm2	Fdps	Tpm2
ENSMUSG00000023092	Fhl1	4.89	3.54	10.43	4.34	50.12	26.25	38.82	35.44	2.924	7.95195e-20	4.00324	31.88	32.1146	31.8113	31.9832	30.0424	30.3245	30.1665	30.3508	1.72622	Xdh	Fhl1	Xdh
ENSMUSG00000003355	Fkbp11	43.2	38.1	34.76	44.16	65.07	68.8	74.01	56.56	0.85	2.10641e-08	1.44684	27.7988	27.6521	27.4607	27.7834	25.7543	26.4249	26.0192	25.5929	1.72594	Lpgat1	Fkbp11	Lpgat1
ENSMUSG00000002732	Fkbp7	14.67	13.29	19.12	24.62	100.24	108.63	114.04	86.72	2.66	5.37493e-51	2.07677	32.4993	32.5372	32.4851	32.6366	30.9063	30.9373	31.0572	30.3917	1.71641	Cyb5a	Fkbp7	Cyb5a
ENSMUSG00000040181	Fmo1	0	0	0	0	7.03	17.2	11.53	9.05	6.878	3.82728e-14	3.4584	27.8787	27.6546	27.4542	27.9475	25.7542	26.2383	26.3389	25.7552	1.71212	Epdr1	Fmo1	Epdr1
ENSMUSG00000026193	Fn1	370.86	347.33	352.85	387.33	840.65	829.19	803.16	743.56	1.273	8.88914e-85	2.32503	26.2221	25.2126	24.9633	26.2341	23.7805	23.9899	24.7542	23.2821	1.70637	2200002D01Rik	Fn1	2200002D01Rik
ENSMUSG00000033487	Fndc3a	27.71	21.27	33.89	35.48	148.61	122.21	155.29	139.51	2.367	1.55055e-63	1.83027	25.6989	26.3332	25.8967	26.2029	24.9374	25.633	22.811	23.9314	1.70468	Tsen15	Fndc3a	No
ENSMUSG00000050295	Foxc1	27.71	31.01	22.6	35.48	93.21	88.71	99.48	112.36	1.875	3.72313e-37	3.59214	25.5669	25.4138	25.0263	25.4744	23.8367	23.706	22.1759	24.9751	1.69694	Meis2	Foxc1	Meis2
ENSMUSG00000030067	Foxp1	277.13	259.61	258.99	257.74	484.52	493.35	539.89	459.26	1.043	3.11578e-51	1.87972	29.2684	28.7719	29.2846	29.5559	27.1284	27.3118	27.7285	27.9425	1.6924	Apbb1ip	Foxp1	Apbb1ip
ENSMUSG00000022816	Fstl1	357	394.3	389.35	351.13	1192.39	1147.83	1166.52	1247.31	1.806	1.60503e-225	1.2373	25.6585	26.0416	23.8834	26.4452	23.6329	24.0709	24.4495	23.1099	1.6914		Fstl1	No
ENSMUSG00000024661	Fth1	748.24	589.23	716.12	621.9	1705.92	1695.49	1827.13	2086.65	1.568	4.34804e-89	1.84018	29.4129	28.3078	28.5439	28.6728	27.3551	27.3541	27.0285	26.4549	1.68618	Erbb2ip	Fth1	No
ENSMUSG00000025241	Fyco1	10.6	19.49	19.12	23.17	35.17	38.02	35.79	42.23	1.128	8.82112e-08	4.63223	28.8592	28.9216	29.0385	28.7332	27.3572	26.9668	27.2942	27.2076	1.68171	Zc2hc1a	Fyco1	Zc2hc1a
ENSMUSG00000020150	Gamt	2.45	2.66	2.61	2.17	23.74	27.16	21.84	23.38	3.352	5.11434e-24	1.98702	24.8363	25.1649	24.8072	25.2308	22.8818	24.468	22.1612	23.8047	1.68087	Plcb1	Gamt	Plcb1
ENSMUSG00000052957	Gas1	51.35	45.19	50.41	53.57	225.11	276.09	262.06	260.17	2.476	6.06632e-124	4.84248	25.0215	25.8453	25.8074	25.8526	23.6666	23.464	23.6462	25.0282	1.68049	Mvp	Gas1	Mvp
ENSMUSG00000022707	Gbe1	9.78	12.4	8.69	18.1	22.86	13.58	23.66	18.85	0.857	0.00492066	-1.39682	26.9963	26.6403	26.2674	26.2408	24.5885	25.3647	24.8797	24.6122	1.67492	Cpt1a	Gbe1	Cpt1a
ENSMUSG00000028270	Gbp2	28.53	46.07	48.67	45.61	10.55	18.1	17.59	18.1	-1.28	2.46282e-08	-1.24377	36.618	36.5844	36.6614	36.8102	34.8443	35.2562	35.0008	34.9295	1.66084	Actc1;Acta1	Gbp2	No
ENSMUSG00000040253	Gbp7	105.14	99.24	105.16	106.43	19.35	9.05	16.38	24.89	-2.407	5.89082e-52	-3.13548	26.8787	26.9917	27.05	27.3001	25.3002	24.6149	26.0237	25.6424	1.6598	Aplp2	Gbp7	Aplp2
ENSMUSG00000029298	Gbp9	19.56	18.61	21.73	17.38	3.52	2.72	1.21	3.02	-2.773	2.31371e-15	-1.41772	33.9765	34.3471	33.8465	34.1072	32.4164	32.2984	32.49	32.4426	1.65746	Pck2	Gbp9	Pck2
ENSMUSG00000038039	Gcc2	118.19	93.92	100.81	94.84	119.59	121.3	134.06	113.12	0.401	0.000294041	-1.99892	29.3771	29.6232	29.6136	29.431	27.9256	27.6255	28.1427	27.7925	1.63962	Leprel4	Gcc2	No
ENSMUSG00000060121	Gemin2	15.49	18.61	15.64	16.65	5.28	4.53	1.82	6.03	-1.786	1.20602e-07	-1.12749	29.9591	30.3847	30.3224	30.3907	28.972	28.4156	28.6971	28.4154	1.63917	Col3a1	Gemin2	Col3a1
ENSMUSG00000020363	Gfpt2	4.08	4.43	9.56	1.45	15.83	12.67	15.77	12.07	1.878	1.32912e-06	2.75864	26.6471	27.5117	26.7274	27.1547	25.611	25.0975	25.2332	25.5742	1.63125	Cr1l	Gfpt2	No
ENSMUSG00000022103	Gfra2	0	0	1.74	0	43.97	45.26	47.32	49.02	7.629	3.14516e-63	2.26766	29.2669	29.3618	29.4398	29.4098	27.8811	28.0913	27.591	27.4337	1.62027	Il6st	Gfra2	Il6st
ENSMUSG00000003316	Glg1	424.65	436.83	407.6	365.61	738.65	695.22	717.02	717.92	0.936	5.18175e-51	1.38687	25.0967	25.5877	26.2456	25.347	23.7823	23.6636	23.9679	24.4097	1.61338	Taf15	Glg1	Taf15
ENSMUSG00000024026	Glo1	39.12	37.21	55.62	36.92	124.87	124.92	119.5	115.38	1.709	1.40717e-40	1.04264	27.8771	27.2476	27.751	27.88	26.1794	26.2903	25.7213	26.1181	1.61166	Tpm1	Glo1	Tpm1
ENSMUSG00000017286	Glod4	14.67	15.95	22.6	6.52	53.64	51.6	53.38	46	1.886	2.96096e-18	1.34246	29.3321	29.4674	29.189	29.0735	27.7528	27.196	27.8617	27.8115	1.61	Impact	Glod4	Impact
ENSMUSG00000021591	Glrx	9.78	8.86	8.69	8.69	47.48	73.32	46.71	46	2.593	1.10188e-26	1.13308	24.2829	25.8886	25.3988	24.9105	22.564	23.9864	24.8326	22.6924	1.60139	Kank1	Glrx	Kank1
ENSMUSG00000011884	Gltp	35.86	33.67	31.29	37.65	20.22	10.86	17.59	12.82	-1.03	1.92933e-06	-1.00633	27.2434	26.7864	26.3912	26.8946	25.3646	25.1039	25.4124	25.0436	1.59775	Eif4g3	Gltp	No
ENSMUSG00000000594	Gm2a	13.86	15.95	13.04	13.03	29.02	16.29	27.3	30.16	1.055	2.07922e-05	1.38522	28.7093	28.8093	28.0715	27.1032	26.6442	26.0649	27.0537	26.5499	1.59515	Arpin	Gm2a	Arpin
ENSMUSG00000033021	Gmppa	15.49	7.97	12.17	11.58	35.17	47.98	33.36	27.15	1.672	9.7658e-11	1.3248	31.2072	31.0916	30.8744	31.2891	29.4055	29.7541	29.6415	29.2993	1.59047	Cdh11	Gmppa	Cdh11
ENSMUSG00000024697	Gna14	0	0	0	0	3.52	2.72	4.25	6.79	5.561	9.05388e-07	1.1612	32.4283	32.5045	32.5924	32.9269	30.7701	31.0309	30.9143	31.3763	1.59012	Tmsb4x	Gna14	Tmsb4x
ENSMUSG00000031748	Gnao1	14.67	16.84	13.91	22.44	79.14	105.01	103.12	96.53	2.619	1.86764e-53	4.05712	25.2753	25.3173	25.4058	25.5293	23.8744	24.0801	22.6621	24.5934	1.57943	Cxcl5	Gnao1	Cxcl5
ENSMUSG00000036402	Gng12	126.34	129.36	151.22	133.21	220.71	239.89	218.38	248.11	0.909	7.66352e-25	1.17403	31.0799	31.0552	30.9399	31.2177	29.6542	29.6424	29.3783	29.3313	1.5716	Snx18	Gng12	Snx18
ENSMUSG00000034109	Golim4	62.76	84.18	51.28	59.37	272.6	224.5	222.63	220.96	2.037	4.38682e-63	1.13057	28.8732	29.2945	28.9473	29.0708	27.5868	27.0642	27.8043	27.4936	1.55918	Tmem55a	Golim4	Tmem55a
ENSMUSG00000034220	Gpc1	61.13	71.77	67.79	65.88	148.61	145.74	145.59	126.69	1.218	1.17343e-28	1.3522	33.207	33.2531	33.1131	33.4431	31.7059	31.6132	31.8529	31.6632	1.54523	Pdlim5	Gpc1	Pdlim5
ENSMUSG00000047454	Gphn	32.6	32.78	25.2	29.68	3.52	4.53	6.07	5.28	-2.443	7.77367e-19	-3.74486	25.868	25.4234	25.1497	25.9132	23.1831	23.2892	25.1194	24.5873	1.5438	Rps10	Gphn	No
ENSMUSG00000031148	Gpkow	14.67	20.38	13.04	19.55	23.74	17.2	20.62	30.92	0.567	0.0359346	-1.16039	25.7926	25.7827	25.8267	26.0623	24.3734	24.2179	24.885	23.8151	1.54321	Itm2c	Gpkow	Itm2c
ENSMUSG00000046733	Gprc5a	55.43	75.31	58.23	67.33	9.67	11.77	22.44	9.8	-2.249	1.44661e-22	-2.20771	30.1225	30.5638	30.3968	30.3969	29.1936	28.5142	28.7849	28.823	1.54109	Mmp14	Gprc5a	Mmp14
ENSMUSG00000028597	Gpx7	2.45	3.54	0.87	5.07	10.55	11.77	7.89	7.54	1.693	0.000134585	2.00974	25.7878	25.1626	25.6473	25.5958	24.182	24.7142	23.4728	23.7342	1.52259	Rab4b	Gpx7	Rab4b
ENSMUSG00000021760	Gpx8	49.72	32.78	53.01	36.92	102	125.83	126.18	124.43	1.61	3.70231e-32	1.00549	26.7904	26.4137	26.4787	26.7137	25.0306	25.4198	24.4578	25.4081	1.52005	Cxadr	Gpx8	No
ENSMUSG00000058135	Gstm1	39.12	45.19	46.06	46.33	154.76	172.9	160.75	197.58	2.076	2.87284e-65	1.30958	25.6302	26.0453	25.5306	25.7595	25.1846	23.3173	23.5224	24.8789	1.51561	Tpd52l2	Gstm1	No
ENSMUSG00000040562	Gstm2	30.16	49.62	38.24	41.27	127.5	155.7	154.69	131.22	1.973	1.34573e-47	1.18471	26.6678	27.0594	26.5134	26.9119	25.1253	25.7679	25.0414	25.2304	1.49689	Sgce	Gstm2	Sgce
ENSMUSG00000020962	Gtf2a1	61.13	73.54	66.92	57.19	34.29	53.41	37	30.16	-0.691	7.72585e-05	-1.33173	29.4192	29.2467	29.1335	29.3855	27.8367	27.9615	27.8165	27.5872	1.4958	Ca13	Gtf2a1	No
ENSMUSG00000020444	Guk1	67.65	55.82	68.66	68.05	82.66	86	114.04	76.17	0.554	0.000183524	1.08965	31.6045	31.7601	31.5098	31.7535	30.1953	30.2003	30.0816	30.187	1.49095	Dnpep	Guk1	Dnpep
ENSMUSG00000044927	H1fx	126.34	133.79	88.65	116.56	33.41	28.97	31.54	27.15	-1.842	4.01584e-32	-1.14367	27.3514	28.1108	27.8086	28.4047	26.8606	26.2413	26.3429	26.2742	1.48914	Zadh2	H1fx	No
ENSMUSG00000073411	H2-D1	869.68	822.26	911.66	806.51	126.63	112.25	109.19	119.15	-2.741	3.13908e-298	-2.85141	26.2801	26.1924	25.5609	26.3629	24.3409	23.5929	25.6796	24.8348	1.48702	Piezo1	H2-D1	Piezo1
ENSMUSG00000061232	H2-K1	758.83	695.56	835.18	646.51	84.42	81.47	63.69	75.41	-3.128	2.87493e-201	-3.77952	27.585	27.5773	26.8529	27.5962	26.0159	25.5927	25.9081	26.164	1.48267	Pfn2	H2-K1	Pfn2
ENSMUSG00000015937	H2afy	250.23	219.74	190.33	235.29	160.92	164.75	156.51	180.99	-0.325	0.000788917	-1.26144	33.5818	33.5635	33.865	33.5733	32.3523	32.4358	31.8281	32.0797	1.47194	Acta2;Actg2	H2afy	No
ENSMUSG00000028980	H6pd	4.08	4.43	11.3	18.82	14.95	16.29	12.74	21.87	1.138	0.00540507	2.26813	26.4275	26.8941	26.2078	26.7058	26.047	23.4195	25.4128	25.4815	1.46863	Eogt	H6pd	Eogt
ENSMUSG00000041840	Haus1	54.61	50.51	73	46.33	18.47	16.29	18.2	12.82	-1.584	5.42816e-14	-1.49824	27.1395	26.7915	27.1049	27.0668	26.0282	26.2763	23.942	25.9857	1.46763	St5	Haus1	St5
ENSMUSG00000038047	Haus6	108.4	89.49	127.75	121.63	34.29	42.55	29.72	30.92	-1.606	7.38791e-25	-1.46403	28.3243	27.7194	27.1435	28.3012	26.6518	26.3203	26.5058	26.1595	1.46274	Plekho2	Haus6	Plekho2
ENSMUSG00000042770	Hebp1	21.19	23.04	21.73	18.1	0.88	3.62	3.64	3.77	-2.602	4.55787e-15	-2.96414	28.1244	28.6754	28.0954	28.8928	27.5528	25.9976	27.6937	26.7094	1.4586	App	Hebp1	No
ENSMUSG00000025001	Hells	523.28	520.12	495.37	490.14	138.94	134.88	152.87	135.74	-1.711	2.78794e-130	-2.1389	33.1472	33.3027	33.014	33.2459	31.767	31.7867	31.7383	31.5933	1.45612	Aldh2	Hells	Aldh2
ENSMUSG00000027580	Helz2	16.3	25.7	16.51	13.76	4.4	1.81	6.07	3.77	-1.907	3.84035e-07	-1.21665	28.6625	28.7071	28.9472	28.7466	27.6576	27.4869	26.897	27.214	1.45197	Klhdc4	Helz2	Klhdc4
ENSMUSG00000029311	Hsd17b11	9.78	15.06	20.86	11.58	52.76	57.03	64.3	47.51	2.154	5.68436e-24	1.15845	34.9044	34.0983	34.9349	34.9289	33.989	33.2439	32.6143	33.2263	1.44824	Anxa6	Hsd17b11	Anxa6
ENSMUSG00000004951	Hspb1	0	0	6.08	3.62	121.35	122.21	119.5	151.58	6.006	2.11615e-112	8.48905	30.1382	30.0581	30.3731	30.6834	28.579	29.4858	29.6264	27.7744	1.44684	Fkbp11	Hspb1	Fkbp11
ENSMUSG00000036854	Hspb6	35.86	37.21	47.8	31.13	111.68	124.92	118.29	106.33	1.761	1.37496e-39	3.32803	28.0401	27.3398	26.0522	27.6834	25.375	26.6512	26.3115	24.9927	1.44627	Cd99	Hspb6	No
ENSMUSG00000041548	Hspb8	19.56	15.95	33.02	23.89	115.19	115.87	130.42	93.51	2.504	3.19223e-46	1.07937	25.7005	25.645	25.9752	25.7555	23.3121	25.0635	23.6993	25.2452	1.43905	Lmo4	Hspb8	Lmo4
ENSMUSG00000025950	Idh1	10.6	5.32	6.08	2.9	61.55	47.07	55.81	81.44	3.501	5.94184e-35	1.25922	26.6939	26.8497	26.7135	26.5838	24.428	25.3958	25.716	25.5467	1.43856	Cebpb	Idh1	Cebpb
ENSMUSG00000073489	Ifi204	13.04	12.4	13.91	18.82	89.69	86	106.16	73.9	2.727	5.04177e-46	1.00406	30.0342	29.617	28.7675	29.8758	27.4577	28.7064	28.3847	27.9994	1.43656	Mri1	Ifi204	No
ENSMUSG00000026896	Ifih1	74.17	54.05	52.14	47.78	9.67	11.77	10.31	15.08	-2.106	9.95943e-21	-3.40303	26.3875	25.3294	25.491	26.1113	24.0623	24.6946	24.564	24.3325	1.41646	Vps37c	Ifih1	Vps37c
ENSMUSG00000034459	Ifit1	196.43	162.15	150.35	181	19.35	23.54	25.48	22.62	-2.777	1.03284e-83	-2.73805	26.8401	26.9764	26.5727	26.9054	24.3173	24.738	26.263	26.3318	1.41115	Mapkapk2	Ifit1	Mapkapk2
ENSMUSG00000045932	Ifit2	15.49	10.63	15.64	11.58	3.52	7.24	3.03	8.3	-1.16	0.00186973	-2.32495	30.8193	30.5246	30.5003	30.8052	29.2514	29.2211	29.1219	29.4118	1.41082	Tgfb1i1	Ifit2	Tgfb1i1
ENSMUSG00000001627	Ifrd1	293.43	308.35	338.07	335.2	108.16	100.48	105.55	131.97	-1.401	2.95606e-52	-3.85421	24.2192	24.7593	24.0279	24.4853	22.6872	23.661	22.8953	22.6196	1.40715	Ptprs	Ifrd1	No
ENSMUSG00000005533	Igf1r	148.34	145.31	165.99	132.49	321.84	263.42	317.26	286.57	1.144	8.30022e-36	1.32613	25.4347	26.3606	25.7324	25.7349	25.2243	24.9247	23.8775	23.6195	1.40412	Atp2b4	Igf1r	Atp2b4
ENSMUSG00000036334	Igsf10	2.45	5.32	1.74	1.45	77.38	109.53	77.65	79.18	5.146	7.87106e-73	-1.62624	29.3866	29.7274	29.7721	29.5397	28.6117	28.0116	28.2278	27.9602	1.40366	Acsl1	Igsf10	Acsl1
ENSMUSG00000078853	Igtp	62.76	43.42	48.67	62.99	8.79	9.96	5.46	12.82	-2.441	1.62439e-23	-4.38111	31.8788	31.8828	31.3006	31.9583	30.2761	30.2107	30.6484	30.2732	1.40303	Ripk3	Igtp	Ripk3
ENSMUSG00000054072	Iigp1	70.91	63.8	86.04	82.53	35.17	28.06	40.64	26.39	-1.072	2.05537e-10	-3.32237	31.7971	31.982	31.3537	31.9888	30.7449	30.0839	30.34	30.3456	1.4018	Rcn1	Iigp1	Rcn1
ENSMUSG00000019975	Ikbip	79.06	76.2	79.09	81.09	173.23	209.11	197.15	150.82	1.366	4.43924e-33	1.29335	33.4111	33.5099	33.4006	33.5257	32.1687	31.8624	32.0893	32.1247	1.40058	Palld	Ikbip	Palld
ENSMUSG00000026981	Il1rn	0	1.77	0	3.62	72.99	63.37	72.19	67.12	6.065	1.57654e-80	2.57939	34.3907	34.4722	34.4254	34.4575	32.9337	33.0617	32.9855	33.1684	1.39914	Esd	Il1rn	Esd
ENSMUSG00000021756	Il6st	234.74	194.05	221.61	243.26	253.25	237.17	287.54	251.88	0.333	0.000165987	1.62027	32.7327	32.768	32.8738	32.7405	31.383	31.3134	31.2882	31.5357	1.39868	Csrp1	Il6st	Csrp1
ENSMUSG00000024423	Impact	46.46	31.9	45.19	34.03	74.74	69.7	89.78	78.43	1.133	5.70402e-14	1.61	26.1372	26.5149	25.683	26.7554	25.0499	24.9407	25.3638	24.1494	1.39666	Amdhd2	Impact	No
ENSMUSG00000034168	Irf2bpl	81.51	86.83	85.17	85.43	58.92	39.83	49.14	64.85	-0.523	0.000263246	-1.22787	24.5124	25.2643	24.4382	25.0628	24.0464	23.9983	23.6032	22.0499	1.39498	Adgra2;Gpr124	Irf2bpl	No
ENSMUSG00000002325	Irf9	175.24	173.67	133.84	148.42	61.55	57.93	64.91	70.89	-1.174	1.43797e-22	-1.05943	31.0826	31.2446	30.9412	30.9173	29.588	29.5002	29.8314	29.7003	1.39146	Echs1	Irf9	Echs1
ENSMUSG00000041037	Irgq	4.89	7.09	14.77	8.69	27.26	29.87	29.72	32.43	2.002	6.56082e-15	1.18561	28.6976	28.7652	27.6357	28.3105	27.4996	26.3736	27.4108	26.5609	1.39104	Dap	Irgq	Dap
ENSMUSG00000035692	Isg15	318.69	357.97	325.9	318.55	30.78	35.3	28.51	25.64	-3.338	2.97082e-197	-2.27479	24.9728	24.624	23.997	24.7301	23.4373	22.8606	24.2535	22.2199	1.38815	Atg101	Isg15	Atg101
ENSMUSG00000086784	Isoc2a	15.49	21.27	6.95	12.31	27.26	28.06	23.66	27.15	1.063	4.73078e-05	1.81463	32.4922	32.6414	32.4898	32.6466	31.2145	31.1681	31.3653	30.9747	1.38687	Glg1	Isoc2a	Glg1
ENSMUSG00000019139	Isyna1	42.38	41.64	39.11	49.95	2.64	4.53	3.03	3.02	-3.571	2.01096e-37	-4.86017	26.9394	26.6151	26.509	27.0577	25.2662	25.5505	25.4422	25.3155	1.3867	Ripk2	Isyna1	Ripk2
ENSMUSG00000001507	Itga3	34.23	45.19	43.45	31.13	9.67	18.1	15.17	11.31	-1.356	1.0673e-08	-1.36326	27.5053	28.1304	27.4554	27.7743	26.8311	26.0771	25.9421	26.4742	1.38522	Gm2a	Itga3	Gm2a
ENSMUSG00000022108	Itm2b	139.38	193.16	174.68	195.47	252.37	248.94	262.66	262.43	0.632	1.24954e-12	1.10828	29.3864	29.9389	29.513	28.8205	28.4092	26.9495	28.3382	28.4645	1.37434	Crip1	Itm2b	Crip1
ENSMUSG00000026223	Itm2c	44.01	70.88	47.8	47.78	115.19	94.14	107.37	126.69	1.29	6.64498e-19	1.54321	26.0471	25.5271	25.3528	25.8523	24.5974	22.8916	24.8773	24.9274	1.37137	Sh3d19	Itm2c	Sh3d19
ENSMUSG00000027332	Ivd	5.71	13.29	6.08	7.96	9.67	19.01	14.56	16.59	1.059	0.00226763	-2.01258	25.5483	25.4905	25.2104	24.8176	23.4817	23.6948	24.9217	23.4966	1.36802	Tgfbr2	Ivd	No
ENSMUSG00000024384	Iws1	145.9	165.69	152.96	173.76	88.81	122.21	83.11	80.69	-0.729	9.46609e-10	-1.06694	28.5755	28.5261	28.4458	28.6694	27.3136	27.0017	27.184	27.2486	1.36718	Adam9	Iws1	Adam9
ENSMUSG00000024789	Jak2	13.86	13.29	13.04	18.82	53.64	59.75	57.63	68.62	2.13	1.26201e-30	3.09661	29.2412	29.436	29.5551	29.6057	28.6731	27.3556	27.5407	28.8138	1.36371	Palm2;Pakap	Jak2	No
ENSMUSG00000052684	Jun	256.75	194.93	169.47	211.4	139.82	140.31	137.1	155.35	-0.386	0.0005691	-1.55881	32.2918	32.501	31.9498	32.2305	30.7863	31.0051	31.0328	30.6974	1.36287	Sod2	Jun	Sod2
ENSMUSG00000032702	Kank1	0	0	0.87	0	51.88	64.27	57.02	59.58	7.962	1.34308e-78	1.60139	26.0165	25.4284	27.119	26.4001	25.0984	25.0861	24.8823	24.4731	1.35598	Antxr1	Kank1	Antxr1
ENSMUSG00000001098	Kctd10	87.21	68.23	91.25	83.98	91.45	89.62	94.03	88.23	0.259	0.0317141	-1.55108	28.0271	27.5749	26.6027	27.3835	25.9362	26.5124	25.7213	26.0095	1.3522	Gpc1	Kctd10	Gpc1
ENSMUSG00000098557	Kctd12	0	0	0	2.17	3.52	7.24	2.43	3.77	3.819	0.000126829	3.88073	25.4908	25.574	25.2242	25.7162	24.9733	23.4348	24.8565	23.3696	1.34274	Timp2	Kctd12	Timp2
ENSMUSG00000030499	Kctd15	4.08	2.66	3.48	3.62	25.5	13.58	18.2	16.59	2.473	2.10756e-11	2.00022	30.6217	30.5056	30.3575	30.4142	28.9114	29.2089	29.19	29.2189	1.34246	Glod4	Kctd15	Glod4
ENSMUSG00000036940	Kdm1a	83.14	72.66	95.6	98.46	51	66.08	61.87	53.54	-0.462	0.00121529	-1.0262	28.3611	28.276	28.2184	28.2668	27.3034	27.0571	27.2732	26.1317	1.33923	Ahnak2	Kdm1a	Ahnak2
ENSMUSG00000041498	Kif14	20.38	28.35	27.81	28.24	72.11	62.46	60.66	66.36	1.44	2.92533e-19	2.00462	31.8886	31.5861	31.6064	31.7472	30.2112	30.6137	30.4926	30.1688	1.33552	Hspa1b	Kif14	No
ENSMUSG00000036768	Kif15	183.39	208.22	199.89	191.13	86.18	89.62	108.58	98.04	-0.885	2.97165e-20	-1.18853	28.435	27.053	27.0624	28.3421	25.9455	26.7529	26.6302	26.2253	1.33465	Myadm	Kif15	Myadm
ENSMUSG00000051378	Kif18b	4.08	8.86	0.87	2.9	8.79	5.43	11.53	11.31	1.565	0.0011248	-2.06732	29.3573	29.0824	29.1802	29.468	27.8446	28.1756	27.8453	27.911	1.32783	Prrc1	Kif18b	Prrc1
ENSMUSG00000022629	Kif21a	40.75	50.51	41.72	20.27	94.97	95.95	84.93	106.33	1.357	4.60256e-16	2.10465	27.6008	27.9344	27.8093	28.333	27.2028	26.4183	26.1053	26.6465	1.32613	Igf1r	Kif21a	Igf1r
ENSMUSG00000032254	Kif23	39.94	36.33	44.32	32.58	69.47	91.43	77.04	91.25	1.236	1.26402e-16	-2.80639	27.7701	27.0835	27.566	28.152	26.3796	25.5208	26.8382	26.5337	1.32482	Arhgef40	Kif23	Arhgef40
ENSMUSG00000040263	Klhdc4	26.08	27.47	19.12	20.27	61.55	61.56	54.6	59.58	1.476	7.3002e-19	1.45197	28.758	28.7844	28.4368	28.706	27.2521	27.2889	27.4473	27.3977	1.3248	Gmppa	Klhdc4	Gmppa
ENSMUSG00000026822	Lcn2	34.23	30.13	30.42	39.09	393.94	354.85	370.64	374.04	3.595	4.5677e-264	4.04248	28.6702	28.5216	29.1185	28.9087	27.5649	27.6096	27.6312	27.1239	1.32233	Nrp1	Lcn2	Nrp1
ENSMUSG00000030246	Ldhb	6.52	0	0.87	0.72	27.26	22.63	31.54	35.44	4.943	3.59002e-28	4.49522	29.1258	29.2025	29.4457	29.511	27.8923	27.8592	28.1188	28.1595	1.31377	Cltb	Ldhb	Cltb
ENSMUSG00000050335	Lgals3	392.05	419.99	369.36	419.91	9.67	10.86	15.17	5.28	-5.088	5.91001e-282	-7.75989	25.715	25.6175	24.9793	25.1588	24.0528	23.5221	23.9886	24.6579	1.31229	Akr1c14	Lgals3	Akr1c14
ENSMUSG00000021190	Lgmn	29.34	19.49	32.16	28.24	7.91	10.86	11.53	11.31	-1.244	1.15214e-06	-2.00183	32.2253	32.3803	31.8615	32.108	30.8421	30.8754	30.7431	30.8761	1.30958	Gstm1	Lgmn	Gstm1
ENSMUSG00000028063	Lmna	305.65	323.41	308.52	314.93	794.04	822.85	897.79	700.58	1.519	2.84218e-96	-1.12994	25.3328	25.8979	25.3823	26.0918	25.2834	23.2139	24.6607	24.3264	1.30508	Tpm1	Lmna	Tpm1
ENSMUSG00000024590	Lmnb1	141.01	109.87	106.03	87.6	114.31	131.26	157.72	142.53	0.476	0.000468428	-2.70174	30.4605	30.6876	30.2061	30.8777	29.1306	29.6039	29.3497	28.9693	1.29461	Vasp	Lmnb1	Vasp
ENSMUSG00000028266	Lmo4	308.1	325.18	284.19	289.59	362.29	355.75	348.2	322.76	0.333	9.22529e-06	1.43905	24.6622	25.1515	25.2514	24.7084	22.9509	24.1201	24.1025	23.4253	1.29361	Pdgfra	Lmo4	Pdgfra
ENSMUSG00000033060	Lmo7	4.89	6.2	6.08	5.79	82.66	101.39	73.4	61.08	3.868	3.87667e-51	3.8129	29.846	29.6895	29.4703	29.7681	28.0984	28.4283	28.8529	28.2208	1.29335	Ikbip	Lmo7	Ikbip
ENSMUSG00000048096	Lmod1	0	0.89	0	0	151.25	142.12	179.56	128.2	9.368	2.80499e-141	5.89981	28.3008	28.2169	28.2409	28.325	27.0059	27.2256	26.8274	26.8634	1.29033	Serpinf1	Lmod1	No
ENSMUSG00000024529	Lox	373.3	365.06	346.76	408.33	1564.35	1526.21	1657.88	1424.53	2.184	1.47371e-243	1.76389	29.651	29.9496	29.6518	29.683	28.762	27.7959	28.6241	28.5962	1.28931	Nt5c	Lox	Nt5c
ENSMUSG00000000693	Loxl3	22.01	24.81	29.55	40.54	36.93	33.49	35.79	41.48	0.527	0.0129661	-2.0655	25.268	25.3403	25.1809	25.0587	23.0311	24.6822	24.4309	23.5556	1.28702	Lemd2	Loxl3	No
ENSMUSG00000026623	Lpgat1	48.09	61.14	56.49	57.19	131.02	132.16	155.29	134.99	1.452	8.78857e-37	1.72594	33.3455	33.2891	33.0913	33.407	31.9416	31.8909	32.0478	32.1045	1.28701	Lpp	Lpgat1	Lpp
ENSMUSG00000033306	Lpp	314.62	302.15	329.38	357.65	571.57	639.09	660	594.25	1.051	6.9012e-53	1.28701	30.5201	30.559	30.543	30.584	29.2679	29.4379	29.4103	29.0091	1.27022	Camk2g	Lpp	Camk2g
ENSMUSG00000040249	Lrp1	77.43	76.2	79.09	78.19	213.68	183.76	199.58	199.09	1.486	2.62737e-54	1.13953	34.187	34.4102	34.316	34.4277	33.0332	33.1331	33.0643	33.0517	1.26468	Oat	Lrp1	Oat
ENSMUSG00000090958	Lrrc32	13.86	6.2	13.91	5.79	72.11	65.18	73.4	76.92	2.976	2.29078e-52	2.2415	29.2885	29.7624	29.5449	29.1511	27.9715	27.8108	28.2541	28.6558	1.26364	Pon3	Lrrc32	Pon3
ENSMUSG00000036273	Lrrk2	8.97	12.4	10.43	7.96	15.83	15.39	12.74	13.57	0.655	0.0266182	-1.12209	31.9699	31.2292	31.8109	31.8932	30.5148	30.8211	30.6224	29.8963	1.26216	Anxa7	Lrrk2	Anxa7
ENSMUSG00000002020	Ltbp2	8.15	4.43	4.35	12.31	196.09	190.1	217.77	166.66	4.923	2.59598e-147	3.74299	31.8786	31.9547	31.5035	31.8555	30.4195	30.5028	30.7234	30.5098	1.25922	Idh1	Ltbp2	Idh1
ENSMUSG00000047557	Lxn	13.86	8.86	14.77	7.96	81.78	66.99	98.27	82.2	3	1.14084e-48	1.83646	30.1316	30.4325	30.281	30.4628	29.1168	29.2372	28.9658	28.9632	1.25622	Acadsb	Lxn	Acadsb
ENSMUSG00000075602	Ly6a	97.81	107.21	102.55	87.6	558.38	584.78	648.47	603.3	2.74	1.41016e-264	3.63022	31.2794	31.1696	31.0304	31.2651	29.8797	30.0743	29.9598	29.8122	1.25464	Pla2g4a	Ly6a	Pla2g4a
ENSMUSG00000026980	Ly75	132.04	121.39	114.72	130.32	18.47	35.3	26.08	30.16	-2.046	2.05345e-48	-2.86124	26.5926	27.247	27.0601	26.9596	25.6199	25.8144	25.9609	25.4496	1.25364	Auh	Ly75	Auh
ENSMUSG00000046573	Lyrm4	55.43	53.16	43.45	65.16	26.38	30.78	26.08	31.67	-0.802	9.88314e-06	-1.69956	33.159	32.3132	33.1095	33.0045	31.8645	31.2124	31.5907	31.921	1.24937	S100a10	Lyrm4	S100a10
ENSMUSG00000036278	Macrod1	3.26	5.32	0.87	4.34	11.43	9.05	13.35	15.84	1.935	9.85484e-07	2.8554	35.5458	35.7507	35.6774	35.7597	34.3093	34.3178	34.4843	34.6265	1.24891	Tagln	Macrod1	Tagln
ENSMUSG00000025268	Maged2	15.49	14.18	14.77	18.82	177.63	134.88	162.57	134.23	3.365	6.83091e-89	1.91889	26.7929	27.137	26.6651	26.7468	25.3474	25.4372	25.9175	25.6629	1.2442	Vwa8	Maged2	No
ENSMUSG00000025037	Maoa	105.14	72.66	53.01	76.74	111.68	143.93	160.75	143.28	1.037	5.30354e-12	1.15024	32.5359	32.5516	32.3146	32.6919	31.1638	31.343	31.3683	31.2611	1.23943	Ehd2	Maoa	Ehd2
ENSMUSG00000027254	Map1a	18.75	17.72	22.6	27.51	124.87	121.3	121.32	100.3	2.544	9.32579e-60	1.9987	30.1155	29.9852	30.5206	30.5382	29.1539	29.1513	29.2349	28.6694	1.23748	2019-09-08	Map1a	No
ENSMUSG00000016528	Mapkapk2	67.65	77.97	74.74	92.67	98.49	76.04	84.93	95.02	0.312	0.0262184	1.41115	29.3649	29.3495	28.8321	29.3612	27.708	28.4081	28.0642	27.7782	1.2373	Fstl1	Mapkapk2	Fstl1
ENSMUSG00000032135	Mcam	13.04	21.27	13.04	16.65	6.16	0.91	1.21	6.79	-2.099	2.04226e-06	-2.10443	26.0173	25.9092	25.3995	25.8472	24.4558	24.1351	24.8479	24.827	1.22685	Tdrd3	Mcam	No
ENSMUSG00000042814	Mcts2	28.53	31.9	45.19	30.41	10.55	20.82	12.13	13.57	-1.152	6.57289e-06	-1.13263	25.0086	24.3213	25.3035	25.1964	24.6035	23.1947	24.0168	23.1142	1.22517	Dars2	Mcts2	No
ENSMUSG00000058006	Mdn1	227.41	217.97	207.71	194.03	68.59	73.32	50.96	67.87	-1.55	1.77982e-44	-1.33032	27.883	27.5128	27.6357	27.8323	26.3516	26.3425	26.6305	26.6788	1.21509	Bphl	Mdn1	No
ENSMUSG00000002768	Mea1	105.14	85.95	93.86	115.84	45.73	45.26	50.96	47.51	-0.947	2.81264e-12	-1.36834	30.6494	30.7151	30.6499	30.7379	29.4045	29.522	29.4975	29.4839	1.21111	Acsl4	Mea1	Acsl4
ENSMUSG00000079487	Med12	32.6	33.67	35.63	29.68	13.19	21.73	24.87	21.12	-0.519	0.0152859	-1.83005	28.4198	28.1988	28.469	28.2886	27.1677	26.8209	27.158	27.4033	1.20655	Vps4a	Med12	Vps4a
ENSMUSG00000027080	Med19	114.11	118.73	108.63	107.15	90.57	78.75	78.25	77.67	-0.337	0.00245095	-1.21346	27.2673	27.9188	27.5699	27.3522	26.8861	26.2526	26.0944	26.0693	1.20148	Aldh6a1	Med19	No
ENSMUSG00000020801	Med31	24.45	25.7	20.86	24.62	10.55	10.86	7.89	6.79	-1.301	3.47092e-07	-1.9234	24.8947	24.8018	25.1939	25.4144	24.5083	22.7652	24.3989	23.8282	1.20107	Col14a1	Med31	Col14a1
ENSMUSG00000027210	Meis2	26.9	23.04	29.55	32.58	122.23	111.34	121.93	116.89	2.194	7.58129e-65	1.69694	25.4792	25.3998	26.0386	25.4622	24.5903	24.4146	24.3671	24.2287	1.19478	Abat	Meis2	Abat
ENSMUSG00000029726	Mepce	33.42	37.21	43.45	37.65	14.07	29.87	22.44	21.12	-0.681	0.00142989	-1.68467	29.5043	29.4785	29.7074	29.4902	28.5021	28.7895	28.2846	27.8327	1.19286	Bag2	Mepce	Bag2
ENSMUSG00000054619	Mettl7a1	0.82	0	0	1.45	7.03	9.05	5.46	11.31	3.65	1.69546e-08	3.97038	28.0658	28.6401	28.7187	28.6995	27.4741	27.2204	27.2482	27.4217	1.18994	Rras	Mettl7a1	Rras
ENSMUSG00000030218	Mgp	1.63	4.43	2.61	2.17	1455.31	1356.03	1444.35	1561.78	9.172	0	3.8682	34.93	34.6818	34.2386	34.9896	33.2511	33.7036	33.9667	33.1621	1.1891	Col1a1	Mgp	Col1a1
ENSMUSG00000008540	Mgst1	4.89	4.43	3.48	4.34	29.02	27.16	43.07	52.79	3.227	2.06807e-22	3.49167	31.7978	31.9126	32.0019	32.0192	30.6916	30.7382	30.8433	30.71	1.18707	Ppic	Mgst1	Ppic
ENSMUSG00000038244	Mical2	16.3	19.49	26.94	18.1	73.86	73.32	64.91	78.43	1.994	5.84847e-31	1.07087	26.293	25.5762	25.4576	25.3846	23.5977	24.8454	24.7681	24.7578	1.18561	Irgq	Mical2	Irgq
ENSMUSG00000012519	Mlkl	31.79	36.33	46.93	34.03	10.55	3.62	12.13	6.03	-1.979	4.07122e-13	-2.0772	32.6788	32.8222	32.3231	32.5806	31.5752	31.2997	31.2144	31.5766	1.18471	Gstm2	Mlkl	Gstm2
ENSMUSG00000027820	Mme	3.26	7.97	4.35	7.96	203.13	186.48	157.11	188.53	5.065	3.21408e-152	9.55247	24.4883	24.4925	25.0498	24.4408	22.4567	23.408	23.7267	24.1516	1.18213	Chsy1	Mme	Chsy1
ENSMUSG00000000957	Mmp14	141.01	147.97	152.96	141.18	279.63	273.38	259.02	293.35	1.052	2.5369e-38	1.54109	25.5049	24.8166	24.8845	25.5593	23.1509	23.58	24.5691	24.7393	1.18146	Plaur	Mmp14	Plaur
ENSMUSG00000031740	Mmp2	39.12	29.24	19.99	28.96	251.49	233.55	256.6	298.63	3.268	9.59443e-135	3.90798	28.9417	29.0057	28.6167	28.6861	27.5996	27.5921	27.601	27.7376	1.17999	Aga	Mmp2	Aga
ENSMUSG00000021103	Mnat1	149.97	177.21	161.65	170.14	65.07	105.01	96.45	92.76	-0.697	6.93567e-10	-1.15255	30.6778	30.7962	30.5281	30.6597	29.4275	29.6682	29.4897	29.3681	1.17712	Acadm	Mnat1	Acadm
ENSMUSG00000090272	Mndal	17.93	27.47	19.12	20.27	52.76	61.56	56.42	65.61	1.621	1.16973e-20	-3.73025	32.5148	32.6952	32.4054	32.7509	31.1687	31.5535	31.4531	31.4846	1.17658	Pnp	Mndal	No
ENSMUSG00000039456	Morc3	57.87	50.51	66.05	79.64	27.26	27.16	26.08	27.15	-1.088	3.20995e-09	-1.02122	31.1618	31.1783	30.9332	31.3253	30.1159	29.7668	30.189	29.8308	1.17403	Gng12	Morc3	Gng12
ENSMUSG00000062270	Morf4l1	88.84	95.69	69.53	104.98	107.28	130.35	119.5	114.63	0.485	7.88222e-05	-1.55656	24.5369	24.5734	24.7451	25.0736	24.2976	23.2902	23.7007	22.9788	1.16543	Slc1a4	Morf4l1	Slc1a4
ENSMUSG00000030521	Mphosph10	202.95	229.49	199.02	251.22	106.4	118.58	107.98	121.41	-0.821	7.82428e-16	-1.16206	27.5292	27.5657	27.646	27.6179	26.1349	26.2103	26.4147	26.9423	1.16411	Osmr	Mphosph10	Osmr
ENSMUSG00000017314	Mpp2	0	5.32	3.48	2.9	14.95	13.58	16.99	13.57	2.357	5.14376e-10	2.30256	27.5301	27.6777	28.0609	27.9264	26.9266	26.312	26.4062	26.9056	1.1612	Gna14	Mpp2	Gna14
ENSMUSG00000057440	Mpp7	35.86	41.64	27.81	31.13	0	0	0	3.02	-6.887	4.77166e-33	-1.25263	30.3023	30.6757	30.3285	30.3416	29.0717	29.2662	29.2973	29.377	1.15897	Tubb2a	Mpp7	Tubb2a
ENSMUSG00000014850	Msh3	39.12	53.16	45.19	55.02	28.14	30.78	28.51	14.33	-0.722	0.000752327	-2.21745	28.8774	28.6386	28.5214	28.6579	27.7627	27.411	27.5319	27.3558	1.15845	Hsd17b11	Msh3	Hsd17b11
ENSMUSG00000042485	Mustn1	0.82	0.89	1.74	2.17	124.87	102.29	114.65	104.07	6.315	2.02646e-127	3.48542	30.1354	30.5142	30.5366	30.508	29.3145	28.7648	29.4791	29.5063	1.15738	Csrp2	Mustn1	Csrp2
ENSMUSG00000030681	Mvp	19.56	20.38	16.51	19.55	27.26	24.44	31.54	33.18	0.758	0.000263681	1.10077	31.9479	31.8109	31.9033	31.9297	30.8261	30.8265	30.7139	30.6244	1.15024	Maoa	Mvp	Maoa
ENSMUSG00000029070	Mxra8	37.49	31.9	42.58	36.2	148.61	138.5	123.14	142.53	2.02	1.7767e-54	2.41972	30.9357	31.2765	31.1454	31.3052	29.9909	29.8291	30.1376	30.1076	1.14938	Casp3	Mxra8	Casp3
ENSMUSG00000068566	Myadm	196.43	193.16	165.12	170.14	317.44	307.78	325.75	321.25	0.946	2.0905e-36	1.33465	31.8414	31.9044	31.7421	31.8932	30.7889	30.5708	30.8244	30.619	1.14449	Farp1	Myadm	Farp1
ENSMUSG00000067818	Myl9	20.38	18.61	22.6	22.44	280.51	266.14	286.32	288.83	3.861	1.39286e-244	3.36891	28.0368	27.5195	27.729	27.8627	26.6009	26.9707	26.6299	26.387	1.13988	Tmed3	Myl9	Tmed3
ENSMUSG00000014907	Naf1	106.77	104.55	106.03	119.46	34.29	55.22	44.89	58.82	-1.023	5.47668e-14	-1.51938	33.9153	33.8206	33.5808	33.9525	32.6836	32.6683	32.8601	32.4991	1.13953	Lrp1	Naf1	Lrp1
ENSMUSG00000020572	Nampt	182.58	186.07	194.67	175.2	59.8	66.99	81.29	89.74	-1.162	7.74984e-28	-1.16106	25.3881	25.6427	25.3107	25.2441	24.2873	24.1692	24.6368	23.9442	1.13702	Athl1	Nampt	No
ENSMUSG00000035024	Ncapd3	57.06	85.95	73.87	72.4	28.14	36.21	23.05	46	-1.028	4.78431e-07	-1.69545	27.5223	27.6176	27.0562	27.5298	25.7364	26.0969	26.7015	26.6471	1.13604	Wasf2	Ncapd3	Wasf2
ENSMUSG00000042029	Ncapg2	101.88	127.59	119.06	91.22	41.33	46.17	29.72	31.67	-1.454	2.35432e-18	-1.30931	30.3855	30.3787	30.2395	30.5766	29.2757	29.0871	29.5146	29.1678	1.13375	Bag3	Ncapg2	Bag3
ENSMUSG00000005125	Ndrg1	156.49	171.01	153.83	133.21	29.9	37.11	41.25	43.74	-1.863	5.47015e-46	-1.08589	29.5994	30.0186	29.338	30.2502	28.5002	29.3339	28.499	28.3408	1.13308	Glrx	Ndrg1	Glrx
ENSMUSG00000041881	Ndufa7	238.82	253.41	212.05	238.91	179.39	192.81	178.95	196.83	-0.207	0.0187195	1.02233	29.7375	29.7084	29.4927	29.8063	28.5122	28.2645	28.7839	28.6621	1.13057	Golim4	Ndufa7	Golim4
ENSMUSG00000002416	Ndufb2	115.74	112.53	113.85	130.32	133.66	139.41	124.96	134.23	0.291	0.00423244	2.37093	27.6124	28.2507	28.0056	27.6457	27.0507	26.1995	26.7988	26.9738	1.12289	Pacsin1	Ndufb2	No
ENSMUSG00000004891	Nes	166.28	133.79	149.48	158.55	43.97	36.21	45.5	52.79	-1.629	4.25214e-41	-1.53126	26.642	26.7167	26.5876	27.0339	25.7828	25.7214	25.9181	25.0984	1.11489	Tm9sf1	Nes	No
ENSMUSG00000039103	Nexn	50.53	39.87	45.19	55.02	261.16	229.02	261.45	236.79	2.495	1.43582e-118	1.9932	25.9729	24.7554	24.4023	25.6486	24.5961	24.1257	24.1866	23.4166	1.11355	Ephb3	Nexn	Ephb3
ENSMUSG00000020716	Nf1	78.25	74.43	70.4	78.19	28.14	41.64	52.78	48.26	-0.612	5.6205e-05	-1.02246	29.3202	29.5619	29.1372	29.3122	28.0009	28.1464	28.3642	28.3704	1.11241	Blvrb	Nf1	Blvrb
ENSMUSG00000023411	Nfatc4	42.38	47.85	38.24	43.44	145.09	174.71	166.82	131.97	1.986	7.86686e-52	2.16141	27.7988	27.8701	27.4891	28.0371	26.5848	27.3213	26.7893	26.0668	1.10828	Itm2b	Nfatc4	Itm2b
ENSMUSG00000005397	Nid1	17.12	29.24	12.17	35.48	132.78	158.41	149.23	156.1	2.808	4.6917e-69	1.98753	32.389	32.7332	32.4272	32.4566	31.3587	31.4529	31.3529	31.4129	1.10711	Oxct1	Nid1	Oxct1
ENSMUSG00000026643	Nmt2	94.55	95.69	111.24	106.43	65.95	44.36	47.92	55.8	-0.839	5.52511e-10	-1.00265	25.1781	24.9094	24.6505	24.9569	23.9385	23.946	23.9577	23.4406	1.10301	Slc25a46	Nmt2	No
ENSMUSG00000032271	Nnmt	44.83	20.38	37.37	22.44	44.85	40.74	50.96	58.07	0.851	0.000176246	1.98417	29.6387	29.782	29.7949	29.5819	28.476	28.75	28.582	28.5827	1.10169	Dclk1	Nnmt	Dclk1
ENSMUSG00000033294	Noc4l	84.77	72.66	90.38	90.5	17.59	29.87	23.05	22.62	-1.742	9.40348e-28	-1.84757	31.6621	31.6375	31.5933	31.6927	30.3968	30.8358	30.536	30.4138	1.10077	Mvp	Noc4l	Mvp
ENSMUSG00000014776	Nol3	15.49	10.63	14.77	4.34	33.41	32.59	37.61	23.38	1.542	4.68829e-08	1.76869	29.3209	29.2339	29.3683	29.5116	28.3519	28.3233	28.0999	28.2666	1.09822	Zak	Nol3	No
ENSMUSG00000031311	Nono	119.82	93.04	116.46	107.87	0	0	0	0	-10.046	8.86749e-121	-4.9411	29.0032	29.1667	29.127	29.215	27.8339	28.0938	28.2936	27.9051	1.0964	Carkd	Nono	No
ENSMUSG00000036693	Nop14	550.18	571.51	526.66	545.88	107.28	113.15	84.32	100.3	-2.298	2.34837e-171	-1.10141	26.3523	27.1437	26.8895	26.1406	25.5084	25.5575	25.6054	25.4872	1.09191	Sil1	Nop14	Sil1
ENSMUSG00000039263	Npepl1	13.86	7.09	15.64	15.2	17.59	20.82	18.81	23.38	0.716	0.00729298	3.0507	27.2476	27.1578	26.9413	27.2653	26.0807	25.4361	26.3221	26.4146	1.08965	Guk1	Npepl1	Guk1
ENSMUSG00000003849	Nqo1	1.63	4.43	3.48	2.9	76.5	57.03	74.61	95.77	4.715	1.88617e-61	5.33163	31.4633	31.5725	31.5177	31.5468	30.423	30.3265	30.4705	30.5254	1.08872	Vcam1	Nqo1	Vcam1
ENSMUSG00000046949	Nqo2	17.12	9.75	14.77	10.86	54.52	42.55	43.68	43.74	1.932	9.25456e-20	2.58861	30.4866	30.7296	30.4375	30.5114	29.2725	29.3106	29.4385	29.79	1.08843	Rexo2	Nqo2	Rexo2
ENSMUSG00000025810	Nrp1	18.75	25.7	10.43	10.86	111.68	112.25	129.82	111.61	3.105	1.99212e-73	1.32233	30.8021	30.8857	30.4727	30.5607	29.4144	29.4476	29.5588	29.9546	1.08641	Serpinc1	Nrp1	No
ENSMUSG00000025969	Nrp2	61.13	50.51	71.26	62.99	7.03	7.24	6.07	3.77	-3.221	2.15579e-42	-1.95213	29.824	29.9166	29.6487	29.8091	28.9254	28.3755	28.7951	28.7592	1.08578	Ak3	Nrp2	Ak3
ENSMUSG00000040331	Nsmce4a	79.06	84.18	92.99	76.02	47.48	52.5	50.35	56.56	-0.546	3.03883e-05	-1.17285	29.6402	29.6915	29.1123	29.7827	28.1545	28.4159	28.6917	28.6323	1.08306	Arfgap3	Nsmce4a	Arfgap3
ENSMUSG00000000916	Nsun5	14.67	14.18	5.21	31.13	5.28	9.05	3.64	3.77	-1.332	0.00802444	-3.52516	26.1131	26.3935	26.5631	26.4399	25.2411	25.2924	25.2175	25.4317	1.08173	Csad	Nsun5	Csad
ENSMUSG00000020736	Nt5c	17.93	27.47	20.86	20.27	42.21	43.45	39.43	46	1.114	1.41911e-09	1.28931	30.3796	30.046	29.7709	30.2552	28.9651	28.9303	29.3038	28.9339	1.07965	Enah	Nt5c	Enah
ENSMUSG00000002804	Nudt14	21.19	16.84	24.33	18.82	4.4	8.15	17.59	7.54	-1.155	0.000620211	-1.40134	28.6441	28.2216	27.4321	28.63	26.8304	27.5217	27.4055	26.8527	1.07937	Hspb8	Nudt14	Hspb8
ENSMUSG00000029561	Oasl2	44.83	44.3	40.85	49.23	3.52	10.86	4.25	10.56	-2.56	5.40278e-25	-2.86588	29.587	29.8539	29.5764	29.5533	28.4925	28.5893	28.48	28.7098	1.07473	Gnpnat1	Oasl2	No
ENSMUSG00000030934	Oat	45.64	55.82	53.01	48.51	104.64	105.91	128.6	125.94	1.342	1.4297e-27	1.26468	26.4898	27.3222	26.7655	27.5568	26.5688	25.8928	25.8506	25.5307	1.07279	Cmc2	Oat	Cmc2
ENSMUSG00000026037	Orc2	159.75	138.22	137.31	156.38	52.76	59.75	60.66	36.2	-1.305	5.40278e-25	-1.4155	28.3201	28.241	28.2936	28.2214	27.516	27.0001	27.5889	26.6875	1.07087	Mical2	Orc2	Mical2
ENSMUSG00000031697	Orc6	114.11	91.26	78.22	86.88	52.76	58.84	63.69	59.58	-0.486	0.000575802	-1.28148	26.4049	26.1907	26.4557	26.5496	25.3325	25.3437	24.8837	25.7591	1.0705	Fas	Orc6	Fas
ENSMUSG00000039050	Osbpl2	32.6	41.64	53.88	49.23	24.62	18.1	24.87	13.57	-0.979	2.87874e-05	1.03891	27.0609	27.2014	27.5436	27.46	26.5594	25.9191	26.4122	26.0963	1.06973	Chd3	Osbpl2	Chd3
ENSMUSG00000022146	Osmr	64.39	57.59	52.14	62.99	76.5	81.47	70.37	54.3	0.398	0.0104733	1.16411	25.2672	25.6447	25.5438	25.4551	24.2212	24.4097	24.1491	24.8542	1.06914	Bcs1l	Osmr	Bcs1l
ENSMUSG00000022186	Oxct1	339.07	403.16	348.5	396.74	703.47	754.96	814.68	710.38	1.136	3.76457e-55	1.10711	28.6741	28.5436	28.3583	28.6883	27.7541	27.6601	27.3801	27.2021	1.06697	Fbn1	Oxct1	Fbn1
ENSMUSG00000029470	P2rx4	17.93	38.99	30.42	20.27	65.95	47.98	49.14	51.28	1.214	3.44887e-08	2.90861	27.13	26.7032	26.6055	26.9763	25.5584	25.2153	26.0117	26.3706	1.06476	Atg4b	P2rx4	No
ENSMUSG00000051048	P4ha3	8.15	4.43	9.56	3.62	60.67	42.55	43.07	63.35	3.15	5.37107e-30	1.87254	29.7884	29.7354	28.8538	29.6482	27.6886	28.3367	29.2578	28.4902	1.06311	Triobp	P4ha3	Triobp
ENSMUSG00000058056	Palld	200.51	216.2	219.01	204.89	597.07	646.33	664.24	662.87	1.748	1.39302e-173	1.40058	24.5718	25.1961	25.1176	24.7716	24.3752	23.8744	22.827	24.3444	1.05903	Pik3ca	Palld	No
ENSMUSG00000024899	Papss2	4.89	5.32	6.08	2.9	9.67	9.96	9.1	18.1	1.353	0.000946098	2.93545	25.5635	26.5498	26.7572	26.4964	25.4719	25.2977	25.1679	25.1945	1.05873	Ssna1	Papss2	Ssna1
ENSMUSG00000063268	Parp10	44.01	28.35	32.16	25.34	12.31	5.43	8.49	9.05	-1.702	1.74939e-09	-4.06583	37.1154	37.3378	37.3647	37.3054	36.2931	36.1462	36.2084	36.2461	1.05735	Serpinh1	Parp10	Serpinh1
ENSMUSG00000034422	Parp14	60.32	80.63	70.4	69.5	25.5	19.01	23.66	19.61	-1.536	3.73082e-19	-1.05059	31.7792	31.9434	31.4621	31.7722	30.2331	30.8431	30.8444	30.8151	1.05531	Pgls	Parp14	Pgls
ENSMUSG00000022906	Parp9	52.16	80.63	57.36	75.29	20.22	20.82	27.3	22.62	-1.395	2.45782e-12	-2.41779	30.2458	30.7838	30.5623	30.6757	29.4435	29.6067	29.4699	29.5294	1.05452	Ctsl	Parp9	Ctsl
ENSMUSG00000035873	Pawr	14.67	17.72	20.86	11.58	73.86	66.08	78.86	54.3	2.227	5.88352e-28	5.6888	30.7466	30.8724	30.5936	30.8835	29.6966	29.5575	29.8395	29.8046	1.04947	Tes	Pawr	Tes
ENSMUSG00000052534	Pbx1	53.79	49.62	53.88	41.99	268.2	309.59	268.12	289.58	2.643	6.97749e-140	2.00208	30.9457	30.8559	31.1515	31.1225	30.0299	30.045	29.8872	29.9303	1.04576	P3h1;Lepre1	Pbx1	No
ENSMUSG00000042613	Pbxip1	117.37	129.36	124.28	156.38	243.58	201.87	230.51	208.14	0.898	3.42387e-18	2.77671	31.7951	31.9941	31.7058	31.7426	30.6649	30.6968	30.7146	30.9907	1.04264	Glo1	Pbxip1	Glo1
ENSMUSG00000021496	Pcbd2	20.38	25.7	29.55	18.82	22.86	33.49	35.79	34.69	0.581	0.00909085	3.05419	26.4472	26.7693	26.721	26.8989	25.6926	25.8035	25.4655	25.7083	1.04163	Chid1	Pcbd2	Chid1
ENSMUSG00000040618	Pck2	191.54	166.58	185.98	199.82	138.94	142.12	147.41	156.1	-0.218	0.0203393	1.65746	26.7993	27.5956	27.4642	27.457	26.7066	25.4441	26.5677	26.4338	1.04098	Ccdc134	Pck2	No
ENSMUSG00000025047	Pdcd11	119.82	108.99	110.37	103.53	34.29	56.12	46.71	54.3	-1.05	5.36365e-16	-1.05489	25.9186	26.1767	26.5328	26.3608	25.5058	25.663	25.6313	24.0331	1.03891	Osbpl2	Pdcd11	Osbpl2
ENSMUSG00000029231	Pdgfra	13.04	6.2	6.95	8.69	53.64	45.26	40.04	42.98	2.499	2.44642e-25	1.29361	27.0441	26.9207	26.7828	27.1009	25.9919	26.1929	25.9462	25.5634	1.0385	Tcaf2	Pdgfra	Tcaf2
ENSMUSG00000024620	Pdgfrb	13.86	9.75	12.17	18.82	21.98	25.35	34.58	50.53	1.297	9.78675e-06	1.78346	33.5925	33.4343	33.5199	33.6909	32.4717	32.4966	32.5879	32.5358	1.03639	Ctps1	Pdgfrb	No
ENSMUSG00000020571	Pdia6	184.21	193.16	199.89	190.41	282.27	310.49	316.65	343.88	0.842	2.05741e-28	6.1739	27.8127	27.2337	27.3065	27.6493	26.4857	26.7351	26.6494	25.9981	1.03351	Ank3	Pdia6	Ank3
ENSMUSG00000055044	Pdlim1	230.67	185.19	213.79	194.75	69.47	47.98	63.09	87.48	-1.501	4.27853e-33	-1.46412	28.4338	29.1711	28.6431	28.9743	27.8065	27.6179	27.4815	28.1912	1.0313	Prmt3	Pdlim1	Prmt3
ENSMUSG00000022090	Pdlim2	52.16	39.87	54.75	54.3	177.63	171.09	168.64	173.45	1.893	4.22324e-71	1.02274	33.217	32.8759	32.4746	33.1122	31.5892	31.9062	32.3713	31.7029	1.0275	Col1a2	Pdlim2	Col1a2
ENSMUSG00000028273	Pdlim5	52.16	36.33	56.49	37.65	122.23	145.74	107.37	141.02	1.639	7.42807e-27	1.54523	30.6104	30.8326	30.7789	30.8584	29.832	29.7188	29.7969	29.6376	1.02373	Cat	Pdlim5	Cat
ENSMUSG00000034021	Pds5b	199.69	202.91	204.23	215.02	104.64	102.29	85.53	104.07	-0.924	2.83243e-22	-1.03199	27.3993	27.6841	27.6198	27.6308	26.4186	26.5086	26.5689	26.7469	1.02274	Pdlim2	Pds5b	Pdlim2
ENSMUSG00000027805	Pfn2	12.23	7.97	3.48	4.34	28.14	20.82	30.94	18.1	2.065	2.294e-09	1.48267	29.1264	29.2231	29.7476	29.2017	28.6418	27.7289	28.3453	28.4934	1.02233	Ndufa7	Pfn2	Ndufa7
ENSMUSG00000029500	Pgam5	85.58	49.62	79.09	65.16	16.71	19.92	21.84	13.57	-1.834	4.30599e-18	-1.39842	27.2212	27.4587	27.103	27.083	26.4936	26.0416	26.4332	25.8198	1.01942	Rab11fip5	Pgam5	No
ENSMUSG00000028961	Pgd	59.5	42.53	47.8	58.64	198.73	172.9	189.87	192.3	1.974	7.54192e-73	1.00273	28.8111	28.5598	28.4857	28.7786	27.2183	27.3307	28.3068	27.705	1.01862		Pgd	No
ENSMUSG00000031807	Pgls	197.25	172.78	154.7	202.71	217.2	238.98	252.35	210.4	0.454	3.36475e-06	1.05531	31.2037	31.2686	30.8047	31.2276	29.9204	30.1906	30.1821	30.1466	1.01624	Ptgr1	Pgls	Ptgr1
ENSMUSG00000056204	Pgpep1	9.78	11.52	11.3	14.48	33.41	39.83	35.18	39.21	1.755	7.99351e-17	2.08083	31.1272	31.0103	30.8108	31.1424	30.0911	29.9365	30.1535	29.8673	1.01059	Atl3	Pgpep1	Atl3
ENSMUSG00000041801	Phlda3	22.01	21.27	32.16	17.38	74.74	94.14	90.99	82.95	2.087	2.66604e-36	1.81905	29.1471	29.0389	29.4151	29.1788	28.5033	28.0277	28.1694	28.0575	1.00549	Gpx8	Phlda3	Gpx8
ENSMUSG00000045658	Pid1	1.63	0.89	0.87	2.17	20.22	16.29	21.23	18.85	3.792	3.67991e-22	2.72412	31.115	31.5094	31.0741	31.6574	30.276	29.7506	30.8426	30.4704	1.00406	Ifi204	Pid1	Ifi204
ENSMUSG00000014444	Piezo1	139.38	116.96	164.26	131.04	74.74	93.24	77.65	99.54	-0.529	3.99903e-05	1.48702	33.5321	33.5768	33.3396	33.3976	32.4552	32.4681	32.3644	32.5475	1.00273	Pgd	Piezo1	Pgd
ENSMUSG00000041957	Pkp2	11.41	14.18	10.43	15.2	16.71	25.35	20.62	9.8	0.664	0.0388028	5.05217	33.6946	33.7447	33.7831	33.7706	32.6858	32.9864	32.5527	32.7608	1.00181	Dstn	Pkp2	Dstn
ENSMUSG00000056220	Pla2g4a	54.61	58.48	36.5	49.23	96.73	104.1	92.81	116.13	1.142	3.54662e-16	1.25464	29.4017	29.2595	29.5424	29.2464	30.3004	30.7094	30.1399	30.3018	-1.00035	Kif11	Pla2g4a	No
ENSMUSG00000046223	Plaur	10.6	13.29	11.3	11.58	12.31	18.1	20.02	16.59	0.67	0.0153893	1.18146	25.5064	24.6712	25.1103	25.9035	26.1293	26.5849	26.2438	26.2395	-1.0015	Ccnt1	Plaur	Ccnt1
ENSMUSG00000051177	Plcb1	0.82	0	0.87	0	67.71	84.19	57.02	57.31	7.117	7.65837e-68	1.68087	26.187	26.4833	26.1666	26.113	26.6939	27.6029	27.5787	27.085	-1.00265	Nmt2	Plcb1	Nmt2
ENSMUSG00000010660	Plcd1	4.08	4.43	1.74	2.9	19.35	22.63	16.38	18.1	2.617	2.84881e-14	2.51017	26.2457	25.8653	25.5719	26.5474	27.1673	26.6263	27.2955	27.1664	-1.00633	Gltp	Plcd1	Gltp
ENSMUSG00000050721	Plekho2	15.49	31.01	21.73	31.86	41.33	35.3	46.1	44.49	0.825	8.69381e-05	1.46274	28.6796	28.9961	28.6329	28.735	29.7696	29.9255	29.6296	29.7557	-1.00922	Sbds	Plekho2	Sbds
ENSMUSG00000027395	Polr1b	20.38	29.24	16.51	23.89	8.79	10.86	7.28	6.79	-1.304	1.18504e-05	-3.19367	29.0416	28.3923	29.0099	28.9422	30.1894	29.7954	29.9977	29.4537	-1.01255	Ddx27	Polr1b	Ddx27
ENSMUSG00000022476	Polr3h	114.11	163.92	133.84	122.35	28.14	49.79	39.43	50.53	-1.472	1.81536e-20	-1.14586	30.0116	30.2906	30.5039	30.2371	31.3092	31.2317	31.1798	31.3838	-1.01534	Fdps	Polr3h	Fdps
ENSMUSG00000029759	Pon3	17.93	31.01	14.77	23.17	35.17	23.54	28.51	33.18	0.658	0.00805688	1.26364	27.5868	27.2883	27.0663	27.2631	28.3231	28.137	28.3911	28.4192	-1.01647	Phax	Pon3	No
ENSMUSG00000004100	Ppan	60.32	103.67	89.52	72.4	35.17	34.4	40.04	39.21	-0.971	5.99546e-08	-1.29542	30.0254	30.0166	29.5457	29.8801	30.7392	30.9998	30.898	30.8987	-1.01696	Ddx58	Ppan	Ddx58
ENSMUSG00000024538	Ppic	159.75	170.12	154.7	147.69	192.58	179.24	180.16	163.64	0.31	0.00101689	1.18707	26.6638	26.7619	26.8448	26.9029	27.8389	27.418	27.9299	28.0693	-1.02066	Polr1d	Ppic	No
ENSMUSG00000021868	Ppif	13.86	16.84	17.38	14.48	5.28	8.15	3.64	5.28	-1.388	1.81194e-05	-1.2847	25.2855	23.886	25.0357	24.6741	25.7494	25.5194	25.8501	25.8471	-1.02122	Morc3	Ppif	Morc3
ENSMUSG00000015757	Ppil4	225.78	232.15	252.03	210.68	75.62	114.96	99.48	59.58	-1.246	1.34523e-22	-2.36927	27.0307	26.5865	26.6569	27.2112	27.9321	27.9916	28.0714	27.5774	-1.02182	Cirh1a	Ppil4	No
ENSMUSG00000073557	Ppp1r12b	2.45	0.89	1.74	6.52	26.38	27.16	23.66	29.41	3.53	2.98848e-23	4.10664	25.3306	24.3259	24.4973	24.4343	25.9336	26.0577	25.2642	25.4225	-1.02246	Nf1	Ppp1r12b	Nf1
ENSMUSG00000019254	Ppp1r12c	49.72	38.99	44.32	34.75	18.47	21.73	26.69	27.9	-0.666	0.000862763	1.73302	28.7099	28.0702	27.8072	28.5056	29.4896	29.0415	29.3911	29.2701	-1.02486	Txnl4a	Ppp1r12c	Txnl4a
ENSMUSG00000025395	Prim1	110.04	116.07	125.15	128.87	52.76	49.79	45.5	39.21	-1.24	2.972e-23	-1.17255	28.1957	28.0692	27.274	28.5264	28.8817	29.5895	29.0095	28.6894	-1.0262	Kdm1a	Prim1	Kdm1a
ENSMUSG00000026134	Prim2	42.38	50.51	56.49	47.78	14.07	17.2	27.9	17.34	-1.269	1.67962e-09	-1.02769	28.3955	27.7005	27.8602	27.7043	28.824	29.1485	29.0158	28.783	-1.02769	Prim2	Prim2	Prim2
ENSMUSG00000037643	Prkci	57.87	35.44	53.01	39.09	16.71	21.73	18.81	23.38	-1.067	9.90459e-07	-1.04539	29.0907	28.6943	28.5836	28.9331	29.7364	30.0245	30.0868	29.5682	-1.02853	Cherp	Prkci	No
ENSMUSG00000030505	Prmt3	88.03	88.61	101.68	82.53	43.09	33.49	45.5	45.25	-0.958	2.17998e-12	1.0313	27.3861	26.7594	26.6414	27.2141	27.9587	28.3181	27.8263	28.0162	-1.02956	Kti12	Prmt3	No
ENSMUSG00000027881	Prpf38b	255.93	302.15	239	297.56	135.42	146.65	151.65	126.69	-0.838	3.00173e-17	-1.10963	29.0312	29.1517	29.1321	29.4161	30.2877	30.2116	30.2317	30.1252	-1.03125	Rfc2	Prpf38b	Rfc2
ENSMUSG00000025742	Prps2	35.86	38.99	41.72	34.75	18.47	10.86	12.13	23.38	-1.152	5.49399e-07	-1.5769	30.5909	30.4695	30.5701	30.6224	31.5482	31.6713	31.6498	31.5116	-1.03199	Pds5b	Prps2	Pds5b
ENSMUSG00000024594	Prrc1	32.6	25.7	19.12	20.27	59.8	27.16	43.68	46.76	1.003	3.82043e-05	1.32783	25.4912	24.8112	24.154	23.8142	25.7938	25.6373	25.5817	25.386	-1.03205	Kri1	Prrc1	No
ENSMUSG00000026586	Prrx1	130.41	100.12	103.42	94.12	521.45	455.33	521.69	549	2.433	3.50198e-158	2.00204	28.7618	28.6906	28.6444	28.9265	29.8365	29.8971	29.881	29.5536	-1.03622	Ece1	Prrx1	Ece1
ENSMUSG00000039476	Prrx2	19.56	17.72	35.63	23.89	231.27	179.24	221.41	258.66	3.449	1.53328e-107	3.07331	25.4727	26.0613	26.3455	25.7125	27.0015	26.3566	26.814	27.5739	-1.03851	Ccdc12	Prrx2	Ccdc12
ENSMUSG00000039126	Prune2	26.9	39.87	24.33	21.72	45.73	40.74	39.43	39.97	0.777	8.40885e-05	2.80747	27.9594	27.5233	27.0264	26.6079	28.1468	28.2036	28.5214	28.4077	-1.0406	Ccnh	Prune2	Ccnh
ENSMUSG00000024338	Psmb8	58.69	61.14	81.69	70.23	27.26	28.97	34.58	26.39	-1.062	4.15331e-10	-1.40948	28.3052	27.8808	28.7445	28.7341	29.7391	29.4004	29.4079	29.2809	-1.04091	Dimt1	Psmb8	Dimt1
ENSMUSG00000017969	Ptgis	0	0	0	0	69.47	59.75	55.2	52.79	9.287	2.63405e-73	6.93536	26.3313	26.0155	26.3596	26.4563	27.6759	27.3241	27.117	27.2127	-1.04176	Bod1l	Ptgis	No
ENSMUSG00000028378	Ptgr1	34.23	18.61	30.42	21	49.24	41.64	63.69	73.15	1.268	1.10457e-08	1.01624	27.1074	25.9537	26.3775	25.9098	26.8721	27.8024	27.2986	27.5469	-1.04293	Cobll1	Ptgr1	No
ENSMUSG00000047250	Ptgs1	15.49	7.09	15.64	11.58	109.92	105.91	110.4	69.38	3.145	1.05537e-50	3.96362	27.8647	27.9231	26.9271	28.2929	28.4822	29.49	28.7981	28.419	-1.04539	Prkci	Ptgs1	Prkci
ENSMUSG00000021009	Ptpn21	47.27	38.99	47.8	34.03	13.19	15.39	11.53	10.56	-1.607	7.23343e-13	-1.68414	29.6915	28.7276	28.9999	29.358	30.3283	30.4709	30.3187	29.8585	-1.04983	Rbm25	Ptpn21	Rbm25
ENSMUSG00000019889	Ptprk	23.64	22.15	37.37	26.06	68.59	79.66	55.81	67.12	1.475	4.49919e-15	1.76269	25.9836	25.8744	25.7387	25.8578	27.0091	26.7605	26.7455	27.1417	-1.05059	Parp14	Ptprk	Parp14
ENSMUSG00000029507	Pus1	30.97	30.13	26.94	21	8.79	14.48	4.25	13.57	-1.213	5.5159e-05	-1.48581	27.1637	27.128	27.2495	26.7189	27.8824	28.1946	27.9991	28.3953	-1.0528	Msto1	Pus1	No
ENSMUSG00000057541	Pus7	90.47	85.06	94.73	94.84	25.5	31.68	21.84	18.1	-1.835	6.14479e-34	-1.30874	26.8014	26.612	26.7401	26.51	27.637	27.9322	27.6898	27.621	-1.0541	Suz12	Pus7	Suz12
ENSMUSG00000032834	Pwp2	44.01	62.02	68.66	57.92	11.43	13.58	13.95	15.08	-1.974	6.18423e-21	-1.40533	30.6318	30.3235	30.9408	30.7186	31.8799	31.8931	31.678	31.3833	-1.05489	Pdcd11	Pwp2	Pdcd11
ENSMUSG00000025140	Pycr1	70.1	107.21	85.17	99.91	38.69	47.98	27.3	36.95	-1.158	3.90216e-10	1.8238	27.892	27.3289	28.0807	27.7723	28.8446	29.102	28.9385	28.4194	-1.05763	Ddx54	Pycr1	Ddx54
ENSMUSG00000019832	Rab32	0	0	0	0.72	18.47	41.64	27.3	36.95	6.801	7.41446e-31	3.06667	25.9286	25.6028	26.1533	26.988	27.5379	27.3913	26.7898	27.1885	-1.0587	Fam195b	Rab32	No
ENSMUSG00000053291	Rab4b	8.97	5.32	7.82	5.79	12.31	9.05	13.35	27.15	1.094	0.00545351	1.52259	26.1957	26.1346	25.6916	26.4794	27.0528	27.3054	27.2795	27.1013	-1.05943	Irf9	Rab4b	Irf9
ENSMUSG00000024824	Rad9a	79.88	65.57	65.18	75.29	5.28	9.05	5.46	10.56	-3.115	2.69845e-49	-1.34675	28.6658	28.1987	28.0781	28.5516	29.739	29.5009	29.5296	28.9627	-1.05948	Cd109	Rad9a	Cd109
ENSMUSG00000010067	Rassf1	256.75	236.58	246.82	232.4	66.83	85.09	45.5	77.67	-1.625	1.20037e-46	-1.2159	27.7365	27.2506	27.5981	27.5012	28.6173	28.7626	28.3498	28.6246	-1.06694	Iws1	Rassf1	Iws1
ENSMUSG00000074102	Rbm15b	29.34	30.13	33.89	41.99	19.35	31.68	20.02	21.87	-0.478	0.0387211	4.43778	28.9722	29.004	28.8543	29.058	30.1002	30.0052	30.0017	30.0632	-1.07045	Cmtr1	Rbm15b	Cmtr1
ENSMUSG00000029594	Rbm19	60.32	51.39	53.88	41.99	14.07	12.67	14.56	17.34	-1.673	1.94227e-16	-1.64697	23.9625	24.3614	24.5446	23.8506	25.4025	25.4917	24.8711	25.2425	-1.07216	Sipa1l1	Rbm19	No
ENSMUSG00000010608	Rbm25	781.66	761.12	759.57	756.56	476.6	503.31	468.91	397.42	-0.569	1.61661e-18	-1.04983	23.5248	24.21	24.1681	24.1448	25.1876	25.0787	24.9816	25.0887	-1.07224	Znhit3	Rbm25	No
ENSMUSG00000046402	Rbp1	2.45	10.63	5.21	6.52	116.95	134.88	115.26	150.07	4.569	2.75649e-98	5.18103	27.5612	27.2382	26.8941	27.5351	28.4866	28.4551	28.3018	28.2856	-1.0751	Smek1	Rbp1	No
ENSMUSG00000031586	Rbpms	8.97	7.09	9.56	6.52	63.31	51.6	64.3	51.28	2.973	5.76565e-41	3.50304	29.089	29.0763	29.0725	29.1863	30.2969	30.3584	29.8252	30.2596	-1.07897	Eif2b1	Rbpms	Eif2b1
ENSMUSG00000005973	Rcn1	58.69	73.54	96.47	79.64	189.06	213.63	205.04	215.68	1.548	6.98805e-46	1.4018	28.7156	28.8556	28.819	28.4663	29.7401	29.6474	29.9053	29.8901	-1.08157	Echdc2	Rcn1	Echdc2
ENSMUSG00000019539	Rcn3	81.51	84.18	79.09	80.36	282.27	268.85	303.91	291.84	1.954	5.79052e-111	1.7475	28.538	28.0626	28.5512	28.0245	29.5613	29.6063	29.3303	29.0049	-1.08161	Cebpz	Rcn3	Cebpz
ENSMUSG00000030243	Recql	12.23	17.72	10.43	18.1	20.22	27.16	25.48	19.61	0.781	0.00242723	-1.25124	25.9544	26.9347	26.9915	26.6808	27.6179	28.1081	27.3894	27.7799	-1.08347	Polr2d	Recql	No
ENSMUSG00000033589	Reep4	24.45	23.92	34.76	25.34	34.29	38.02	50.96	40.72	0.753	0.000160565	-1.33776	26.8557	26.627	27.9483	27.2588	28.2566	28.3305	28.2679	28.176	-1.08534	Yars2	Reep4	No
ENSMUSG00000031387	Renbp	123.89	141.77	109.5	128.87	8.79	9.05	11.53	15.08	-3.34	1.10908e-80	-3.70877	27.1368	26.514	26.5843	26.3481	27.8381	27.744	27.8347	27.5095	-1.08575	Heatr5b	Renbp	No
ENSMUSG00000032026	Rexo2	294.24	312.78	353.71	303.35	570.69	530.46	555.05	507.52	0.918	6.34244e-37	1.08843	29.3249	29.4304	29.1169	29.434	30.2247	30.4642	30.6124	30.3486	-1.08589	Ndrg1	Rexo2	Ndrg1
ENSMUSG00000052406	Rexo4	122.26	127.59	100.81	127.42	63.31	57.03	62.48	62.59	-0.841	1.38267e-12	-1.30993	26.9082	26.6392	26.8249	27.3992	27.8332	28.8391	27.7833	27.6599	-1.08603	Arglu1	Rexo4	No
ENSMUSG00000023104	Rfc2	78.25	67.34	61.7	85.43	50.12	45.26	44.89	27.9	-0.627	0.000386476	-1.03125	23.0165	22.9079	22.8438	23.3333	24.3019	23.9957	24.0748	24.0756	-1.08662	1110004E09Rik	Rfc2	1110004E09Rik
ENSMUSG00000041135	Ripk2	12.23	21.27	10.43	20.27	32.54	41.64	37	22.62	1.19	1.07347e-05	1.3867	26.8223	26.4516	26.4194	26.7859	27.7718	28.0203	27.7681	27.3187	-1.09992	Rps19bp1	Ripk2	Rps19bp1
ENSMUSG00000022221	Ripk3	39.94	30.13	37.37	33.3	91.45	93.24	111.01	79.18	1.549	7.30486e-24	1.40303	27.8028	27.2744	28.156	27.9311	29.3549	28.9199	28.8719	28.4233	-1.10141	Nop14	Ripk3	Nop14
ENSMUSG00000070327	Rnf213	101.07	90.38	101.68	107.87	27.26	17.2	36.4	34.69	-1.563	1.77541e-25	-1.39195	22.8844	23.1055	23.1221	22.455	24.2742	23.4816	24.6496	23.589	-1.10686		Rnf213	No
ENSMUSG00000041926	Rnpep	8.15	9.75	6.95	13.76	50.12	31.68	37	31.67	2.014	2.09325e-14	3.31815	24.5914	24.4989	24.2989	24.6216	25.4432	25.6067	25.5006	25.8987	-1.10963	Prpf38b	Rnpep	Prpf38b
ENSMUSG00000051518	Rps19bp1	225.78	219.74	249.43	215.75	93.21	120.4	112.22	94.26	-0.985	2.11902e-24	-1.09992	30.5288	30.3289	30.3051	30.4482	31.5696	31.4075	31.5327	31.5427	-1.11038	Rrp12	Rps19bp1	Rrp12
ENSMUSG00000038387	Rras	54.61	44.3	61.7	57.19	80.02	92.33	91.6	106.33	0.895	1.62956e-11	1.18994	28.6145	28.1297	28.0977	28.6053	29.1029	29.6935	29.5903	29.5399	-1.11984	Cpsf2	Rras	Cpsf2
ENSMUSG00000020649	Rrm2	80.69	56.71	66.92	78.19	58.92	46.17	56.42	44.49	-0.327	0.0463118	-1.23509	24.8971	24.3074	24.4231	24.7778	25.7783	25.3663	25.9447	25.7974	-1.12033	Med27	Rrm2	No
ENSMUSG00000035049	Rrp12	70.91	51.39	37.37	61.54	20.22	17.2	12.13	12.82	-1.753	2.54668e-13	-1.11038	24.4137	23.6557	23.8233	24.7041	25.3117	25.963	24.8536	24.9569	-1.12209	Lrrk2	Rrp12	Lrrk2
ENSMUSG00000041506	Rrp9	94.55	78.86	76.48	81.81	23.74	19.92	18.2	13.57	-2.021	3.47039e-33	-1.33684	24.4917	25.1047	24.2181	24.7358	26.1501	25.4946	25.4993	25.9159	-1.12738	Ttc39b	Rrp9	Ttc39b
ENSMUSG00000032215	Rsl24d1	62.76	71.77	69.53	68.05	23.74	23.54	25.48	34.69	-1.216	1.28304e-14	-1.54666	25.3605	25.5361	25.8203	25.129	25.8962	27.7419	26.4569	26.2607	-1.12749	Gemin2	Rsl24d1	Gemin2
ENSMUSG00000033355	Rtp4	103.51	77.09	101.68	104.25	30.78	24.44	19.41	26.39	-1.839	4.22197e-29	-1.96658	23.8814	24.1761	23.8235	23.81	24.8306	25.0245	24.8507	25.5015	-1.12907	Psmb9	Rtp4	No
ENSMUSG00000041959	S100a10	158.12	175.44	188.59	164.34	418.57	335.84	363.97	355.19	1.207	9.2949e-45	1.24937	23.577	25.0069	23.0255	24.0828	25.2919	24.946	24.9211	25.0527	-1.12988	Elf2	S100a10	Elf2
ENSMUSG00000040026	Saa3	661.84	686.69	702.21	603.08	7502.53	6822.7	7010.05	7589.45	3.577	0	5.67843	33.0947	33.063	33.138	32.8548	34.3139	33.9846	34.5645	33.8072	-1.12994	Lmna	Saa3	Lmna
ENSMUSG00000025337	Sbds	135.3	116.07	102.55	133.21	24.62	47.07	37.61	35.44	-1.624	4.2767e-26	-1.00922	25.2913	25.1478	23.6824	25.567	26.2769	26.1929	25.8631	25.8861	-1.13263	Mcts2	Sbds	Mcts2
ENSMUSG00000038095	Sbno1	511.05	443.03	483.21	450.32	195.21	218.16	212.92	184.76	-1.087	7.41195e-48	-2.06317	26.6573	26.3907	26.3645	26.6333	27.4884	27.7182	27.649	27.7336	-1.13587	Chaf1a	Sbno1	Chaf1a
ENSMUSG00000037936	Scarb1	28.53	25.7	33.02	36.2	11.43	15.39	10.31	14.33	-1.156	9.09865e-07	-2.6078	26.2051	26.1541	26.1647	26.6711	27.8385	27.5701	27.6662	26.695	-1.14367	H1fx	Scarb1	H1fx
ENSMUSG00000019124	Scrn1	5.71	5.32	3.48	6.52	32.54	23.54	26.69	24.13	2.434	3.08517e-17	2.78109	24.4829	23.407	24.6764	24.2655	25.0365	25.8177	25.565	24.9961	-1.14586	Polr3h	Scrn1	Polr3h
ENSMUSG00000029415	Sdad1	188.28	198.48	203.36	209.95	47.48	51.6	69.76	41.48	-1.846	5.80841e-54	-2.42196	26.9997	27.7406	27.8634	27.2703	28.722	28.1454	28.8043	28.7988	-1.14911	Paf	Sdad1	No
ENSMUSG00000018398	Sept8	174.43	184.3	168.6	175.2	145.97	132.16	129.21	128.2	-0.266	0.00505732	1.23748	26.679	26.7804	26.9091	26.8406	28.0262	27.2531	28.2657	28.2743	-1.15255	Mnat1	No	Mnat1
ENSMUSG00000041481	Serpina3g	10.6	7.09	10.43	7.96	60.67	95.05	93.42	84.46	3.359	3.84856e-55	-6.33995	24.1149	24.1508	25.1313	23.9509	25.2457	24.5904	26.0606	26.0701	-1.1547	Spdl1	Serpina3g	No
ENSMUSG00000079014	Serpina3i	0	0	0.87	0	3.52	4.53	13.35	6.03	4.758	7.41576e-07	-5.89159	22.5511	22.9277	23.5286	22.9717	24.3003	24.2363	23.8442	24.2313	-1.15826	Kdm3a	Serpina3i	No
ENSMUSG00000044734	Serpinb1a	0	0	0	1.45	56.28	78.75	59.45	53.54	7.725	5.22317e-62	6.60587	23.5431	23.2613	23.431	23.7502	24.4769	25.0389	24.6459	24.4614	-1.15938	Appbp2	Serpinb1a	Appbp2
ENSMUSG00000045827	Serpinb9	6.52	7.09	1.74	8.69	34.29	38.92	40.04	36.2	2.641	1.81024e-26	2.23774	24.2558	23.7169	23.6693	23.4239	24.4368	25.2112	25.8891	24.1704	-1.16039	Gpkow	Serpinb9	Gpkow
ENSMUSG00000026249	Serpine2	0	0	0	0.72	400.1	414.59	420.38	472.08	10.575	0	6.21114	29.8535	30.1835	29.7605	29.942	30.9747	31.1362	31.1032	31.1696	-1.16106	Nampt	Serpine2	Nampt
ENSMUSG00000070436	Serpinh1	668.36	636.19	621.39	611.76	682.37	592.02	628.45	951.7	0.192	0.047376	1.05735	26.6006	26.5073	26.1954	26.7455	27.8941	28.0914	27.5769	27.1347	-1.16206	Mphosph10	Serpinh1	Mphosph10
ENSMUSG00000042272	Sestd1	31.79	31.01	28.68	34.03	53.64	64.27	62.48	60.33	1.065	4.47424e-13	2.6335	23.0732	22.1489	24.2678	22.8152	24.2111	24.3254	24.1096	24.311	-1.163	Mettl15	Sestd1	No
ENSMUSG00000020354	Sgcd	1.63	1.77	0	0	10.55	9.96	15.77	8.3	3.762	3.14294e-11	3.33206	27.5169	27.5517	26.7488	26.856	28.9564	28.4776	28.4749	27.4181	-1.16341	Cers5	Sgcd	Cers5
ENSMUSG00000004631	Sgce	16.3	7.09	13.91	13.03	4.4	6.34	6.67	8.3	-0.835	0.0221001	1.49689	25.2934	24.1401	25.5188	23.7774	25.9081	25.3276	26.0029	26.154	-1.16571	Cdca8	Sgce	Cdca8
ENSMUSG00000028082	Sh3d19	26.9	31.01	19.99	23.17	83.54	66.08	66.12	67.87	1.604	4.9435e-21	1.37137	28.5911	28.5053	28.8372	28.6659	29.5693	30.1772	29.7072	29.8145	-1.16719	Bud31	Sh3d19	Bud31
ENSMUSG00000024357	Sil1	19.56	17.72	26.94	35.48	31.66	38.02	27.3	36.95	0.598	0.0145995	1.09191	29.5479	29.1768	29.994	29.5526	30.92	30.8951	30.6133	30.5229	-1.17	Kiaa0020	Sil1	No
ENSMUSG00000023030	Slc11a2	31.79	44.3	42.58	57.92	104.64	97.76	101.91	127.45	1.431	4.41527e-20	2.37764	28.867	28.4038	28.4683	28.7238	29.6733	29.8285	29.8519	29.7994	-1.17255	Prim1	Slc11a2	Prim1
ENSMUSG00000024597	Slc12a2	76.62	76.2	69.53	63.71	150.37	155.7	132.85	180.23	1.247	1.02627e-24	1.76649	24.7717	25.2047	24.758	25.3868	26.3812	26.6453	25.8568	25.9293	-1.17285	Nsmce4a	Slc12a2	Nsmce4a
ENSMUSG00000020142	Slc1a4	83.14	64.68	69.53	75.29	33.41	23.54	41.25	35.44	-0.95	3.17618e-09	1.16543	24.2532	24.1635	24.1424	24.8551	25.0554	26.1276	26.0046	24.9188	-1.17305	Znf593	Slc1a4	No
ENSMUSG00000041313	Slc7a1	392.87	395.18	364.14	330.14	43.09	45.26	40.04	46	-2.964	6.73863e-171	-1.72169	27.8333	27.6042	27.5707	27.4159	28.9333	28.9892	28.655	28.5464	-1.17491	Adar	Slc7a1	Adar
ENSMUSG00000020733	Slc9a3r1	8.97	8.86	9.56	4.34	25.5	32.59	41.86	24.89	2.114	8.53995e-13	1.89774	28.5048	28.1156	28.3921	28.78	29.8505	30.3899	29.8017	28.4515	-1.17527	H3f3a;H3f3c	Slc9a3r1	No
ENSMUSG00000020409	Slu7	208.66	204.68	222.48	178.1	97.61	96.86	118.29	110.86	-0.799	1.57527e-15	-1.80643	26.8208	27.028	26.5192	26.8114	27.9988	27.6507	28.1537	28.0831	-1.17672	Dtx3l	Slu7	Dtx3l
ENSMUSG00000020608	Smc6	575.44	577.71	597.93	616.83	318.32	329.5	325.75	315.22	-0.748	1.58362e-38	-1.73691	29.9632	30.1637	29.6725	29.8522	31.2049	31.0737	31.0037	31.1008	-1.18284	Stat1	Smc6	Stat1
ENSMUSG00000042364	Snx18	102.7	112.53	109.5	104.98	206.64	213.63	226.87	296.37	1.205	6.28586e-31	1.5716	27.3902	27.1848	27.2633	27.6916	28.7504	28.6632	28.1222	28.7344	-1.18508	Ddx51	Snx18	Ddx51
ENSMUSG00000029560	Snx8	203.77	219.74	179.9	209.23	41.33	42.55	33.36	38.46	-2.27	9.20382e-81	-3.33228	23.4999	25.1157	25.4831	25.281	26.2025	25.8529	25.8696	26.2005	-1.18644	Sap30	Snx8	No
ENSMUSG00000006818	Sod2	63.58	46.96	69.53	58.64	138.94	129.45	145.59	172.69	1.411	2.18288e-29	1.36287	27.364	26.9439	28.6374	28.0859	29.2273	29.0677	29.0452	28.4445	-1.18837	Utp6	Sod2	Utp6
ENSMUSG00000025006	Sorbs1	8.15	7.97	11.3	3.62	66.83	115.87	110.4	84.46	3.737	2.11171e-50	3.50173	27.1519	26.529	27.2392	27.7103	28.39	28.3583	28.398	28.2383	-1.18853	Kif15	Sorbs1	Kif15
ENSMUSG00000022091	Sorbs3	1.63	8.86	3.48	0.72	9.67	4.53	16.99	4.52	1.729	0.00966735	2.28473	24.6252	25.3701	25.7621	25.4827	26.9403	26.7428	25.8717	26.4901	-1.20121	Abhd17b	Sorbs3	Abhd17b
ENSMUSG00000057738	Sptan1	171.17	204.68	161.65	181	125.75	134.88	138.31	114.63	-0.339	0.00126345	-1.40147	25.1715	23.4215	24.0255	25.2315	25.7816	26.0754	25.5024	25.3426	-1.213	Tox4	Sptan1	No
ENSMUSG00000021468	Sptlc1	50.53	44.3	31.29	38.37	58.04	59.75	50.96	71.64	0.67	0.000155952	-1.32551	25.7989	25.4662	25.7618	25.5934	26.7196	27.333	26.8085	26.6132	-1.21346	Med19	Sptlc1	Med19
ENSMUSG00000024528	Srfbp1	11.41	17.72	19.99	10.14	6.16	3.62	3.64	4.52	-1.576	6.04333e-05	-2.21445	26.235	26.3285	26.4475	25.7489	27.4592	27.1257	27.3768	27.6617	-1.2159	Rassf1	Srfbp1	Rassf1
ENSMUSG00000026966	Ssna1	40.75	38.99	39.98	29.68	57.16	45.26	52.78	59.58	0.666	5.51633e-05	1.05873	26.8002	26.7441	26.0196	26.4738	27.7826	28.0194	27.6961	27.4061	-1.21665	Helz2	Ssna1	Helz2
ENSMUSG00000031024	St5	22.82	36.33	19.12	22.44	85.3	89.62	80.68	82.2	1.97	4.40936e-35	1.46763	27.6898	27.5934	26.3563	27.1882	28.2645	28.5603	28.659	28.2553	-1.22787	Irf2bpl	St5	Irf2bpl
ENSMUSG00000026104	Stat1	69.28	56.71	49.54	49.95	23.74	33.49	31.54	37.71	-0.687	0.000169425	-1.18284	28.8097	28.7225	28.8657	29.171	30.2181	30.4161	29.9709	29.8804	-1.22919	Eif2ak2	Stat1	Eif2ak2
ENSMUSG00000012428	Steap4	0	0	0	0.72	13.19	5.43	14.56	9.8	5.295	8.1789e-13	4.82293	26.76	27.7116	27.891	27.3442	28.2258	28.6308	29.2325	28.544	-1.23156	Phldb1	Steap4	No
ENSMUSG00000017548	Suz12	312.99	291.51	268.55	288.14	134.54	124.92	128	113.12	-1.085	5.63777e-37	-1.0541	29.5756	29.7035	29.6053	29.6146	30.6751	30.9799	30.937	30.8473	-1.23509	Rrm2	Suz12	Rrm2
ENSMUSG00000043079	Synpo	4.89	5.32	5.21	7.96	93.21	76.94	100.7	72.4	3.97	7.04504e-65	4.44379	24.9244	23.3895	24.8305	24.5921	25.8062	25.8295	25.2816	25.765	-1.23647	Ankrd52	Synpo	No
ENSMUSG00000020680	Taf15	125.52	108.1	108.63	129.59	52.76	38.92	40.04	52.79	-1.234	2.56835e-20	1.61338	25.0172	24.0148	25.299	25.3298	26.1898	26.4067	25.9417	26.0843	-1.24042	Aen	Taf15	No
ENSMUSG00000032085	Tagln	146.71	163.92	117.33	136.11	443.19	442.66	411.29	450.21	1.763	5.18621e-95	1.24891	28.8987	29.1941	28.4494	28.8847	30.326	30.2484	29.8752	29.9523	-1.24377	Gbp2	Tagln	Gbp2
ENSMUSG00000037321	Tap1	59.5	51.39	45.19	52.13	24.62	28.06	27.3	27.15	-0.827	6.83055e-07	-2.19754	25.2929	25.3504	25.4156	26.2163	26.6227	27.7653	26.871	26.0212	-1.25124	Recql	Tap1	Recql
ENSMUSG00000024339	Tap2	18.75	19.49	6.95	18.1	9.67	6.34	4.85	4.52	-1.288	0.000795907	-2.21277	24.4345	23.3082	24.907	23.1532	25.5182	25.1069	24.8448	25.3436	-1.25263	Mpp7	Tap2	Mpp7
ENSMUSG00000024308	Tapbp	294.24	284.42	223.35	283.08	87.05	105.91	117.08	77.67	-1.355	1.03626e-30	-2.11642	27.024	26.9838	26.9994	26.5633	27.9426	27.8587	28.3503	28.4392	-1.25508	Zcchc8	Tapbp	Zcchc8
ENSMUSG00000037410	Tbc1d2b	20.38	7.97	10.43	12.31	36.05	27.16	28.51	33.18	1.508	2.96776e-09	1.7502	28.1588	28.8307	28.4862	27.9085	29.1353	29.5598	29.7372	29.9807	-1.25721	Eno3	Tbc1d2b	No
ENSMUSG00000029851	Tcaf2	4.08	3.54	7.82	6.52	11.43	12.67	18.81	12.07	1.46	5.27387e-05	1.0385	25.1689	25.1958	23.0582	24.6594	25.6114	25.7412	26.0615	25.7027	-1.25865	Xylb	Tcaf2	No
ENSMUSG00000029552	Tes	27.71	27.47	26.07	25.34	174.99	175.61	175.92	167.41	2.83	1.86698e-128	1.04947	28.8664	28.3582	29.1038	28.4462	30.1527	29.8582	29.9432	29.8627	-1.26053	Ddx56	Tes	Ddx56
ENSMUSG00000026049	Tex30	40.75	25.7	37.37	52.85	12.31	11.77	12.74	7.54	-1.68	6.85247e-10	-1.42979	28.3078	28.1057	28.7101	28.4873	29.8782	29.5552	29.6485	29.5713	-1.26058	Ddx24	Tex30	Ddx24
ENSMUSG00000022797	Tfrc	131.23	111.64	159.04	121.63	88.81	93.24	94.03	79.18	-0.391	0.00159344	-1.60395	24.0674	23.6564	24.8294	24.9628	26.1002	26.0455	25.2902	25.1253	-1.26127	Ndnl2;1700020D05Rik	Tfrc	No
ENSMUSG00000030782	Tgfb1i1	27.71	13.29	12.17	17.38	93.21	102.29	88.57	108.59	2.714	1.19065e-51	1.41082	23.2435	21.7026	23.3173	23.0612	24.2558	23.5142	24.3307	24.2696	-1.26144	H2afy	Tgfb1i1	H2afy
ENSMUSG00000029287	Tgfbr3	30.16	31.9	33.89	22.44	46.61	53.41	40.64	41.48	0.748	6.69712e-05	2.89997	30.0554	29.9661	29.6702	29.8761	30.8934	31.49	31.1047	31.1294	-1.26241	Alad	Tgfbr3	Alad
ENSMUSG00000037820	Tgm2	24.45	15.95	18.25	21	75.62	62.46	74.61	68.62	1.942	5.09166e-32	5.23174	27.1932	27.4001	26.2806	27.2896	28.5186	28.6965	27.9658	28.087	-1.27614	Tmem209	Tgm2	Tmem209
ENSMUSG00000040152	Thbs1	56.24	33.67	58.23	52.13	269.08	306.87	271.16	317.48	2.608	5.17174e-118	1.8567	26.3011	26.3653	24.4649	26.3627	27.1596	27.3409	26.8374	27.2671	-1.27777	Slc4a1ap	Thbs1	No
ENSMUSG00000032011	Thy1	4.08	4.43	5.21	2.9	138.06	171.09	151.65	135.74	5.275	1.46551e-144	5.48668	24.2869	24.3726	22.9221	23.6803	25.3515	25.0408	25.0069	24.9886	-1.28148	Orc6	Thy1	Orc6
ENSMUSG00000039994	Timeless	126.34	131.14	119.93	115.84	53.64	31.68	43.68	44.49	-1.368	2.07645e-26	-2.48114	27.4515	26.4457	26.8193	27.3124	28.4845	28.4134	27.8262	28.4436	-1.2847	Ppif	Timeless	Ppif
ENSMUSG00000017466	Timp2	1142.73	1063.27	1024.64	1058.46	1609.19	1740.75	1748.87	1549.71	0.77	4.5803e-45	1.34274	26.1598	26.2864	26.3991	26.5148	27.2818	27.8203	28.1581	27.2456	-1.28643	Baz1a	Timp2	Baz1a
ENSMUSG00000052698	Tln2	33.42	15.06	19.99	23.17	92.33	76.04	104.34	71.64	2.108	6.72309e-26	3.1864	28.3106	28.0776	28.5301	28.3241	29.8333	29.6697	29.445	29.4759	-1.29542	Ppan	Tln2	Ppan
ENSMUSG00000032353	Tmed3	53.79	40.76	42.58	52.85	76.5	87.81	80.07	81.44	0.894	1.04821e-11	1.13988	27.7285	26.9666	27.2243	25.9881	28.7171	28.3217	27.9261	28.1256	-1.29574	Morc2a	Tmed3	No
ENSMUSG00000029810	Tmem176b	120.63	107.21	124.28	131.04	626.97	589.3	627.24	634.21	2.485	6.953e-270	3.15491	28.588	28.514	28.6985	28.5494	29.9248	29.8695	29.7314	30.0592	-1.30874	Pus7	Tmem176b	Pus7
ENSMUSG00000029782	Tmem209	56.24	61.14	45.19	60.09	25.5	19.01	10.92	23.38	-1.317	7.61482e-10	-1.27614	25.7091	25.8675	25.7622	25.4342	27.5045	27.0425	26.8291	26.6344	-1.30931	Ncapg2	Tmem209	Ncapg2
ENSMUSG00000028221	Tmem55a	13.04	20.38	9.56	13.03	52.76	48.88	52.78	67.12	2.17	1.36271e-24	1.55918	26.8131	26.7881	27.6837	26.8464	28.3837	28.5245	28.2147	28.248	-1.30993	Rexo4	Tmem55a	Rexo4
ENSMUSG00000028618	Tmem59	123.89	103.67	100.81	87.6	206.64	181.05	188.05	188.53	1.03	2.90711e-23	3.56784	25.6695	25.6897	26.2796	26.0683	27.7535	27.8181	27.0437	26.3939	-1.32551	Sptlc1	Tmem59	Sptlc1
ENSMUSG00000049775	Tmsb4x	48.9	47.85	53.88	44.89	488.03	545.85	559.3	671.92	3.632	5.35334e-251	1.59012	26.4489	26.2236	25.0517	26.5269	27.4277	27.6032	27.424	27.1134	-1.32931	Trmt61a	Tmsb4x	Trmt61a
ENSMUSG00000060519	Tor3a	91.29	79.75	77.35	70.95	12.31	20.82	12.74	9.8	-2.482	4.54978e-38	-4.18235	28.7403	28.0359	28.4053	28.191	29.51	29.9636	29.7441	29.4761	-1.33032	Mdn1	Tor3a	Mdn1
ENSMUSG00000032366	Tpm1	756.39	705.3	688.31	700.81	2006.65	2098.32	2004.86	2162.81	1.668	2.21859e-276	1.30508	28.7304	28.0928	26.8906	28.7695	29.3521	29.5017	29.8758	29.0788	-1.33125	Lamc1	Tpm1	No
ENSMUSG00000028464	Tpm2	163.01	174.55	165.12	215.75	602.35	650.86	658.78	658.35	2.014	5.44345e-164	1.73213	23.2952	23.803	23.175	22.8236	24.1496	24.9598	24.7126	24.6017	-1.33173	Gtf2a1	Tpm2	Gtf2a1
ENSMUSG00000029344	Tpst2	73.36	54.05	59.1	54.3	27.26	19.92	27.9	26.39	-1.09	6.93567e-10	-1.3429	23.6555	22.8491	23.754	23.4705	24.4576	24.5414	25.1865	24.888	-1.33613	Pdss1	Tpst2	No
ENSMUSG00000033088	Triobp	28.53	47.85	20.86	40.54	72.99	46.17	63.09	56.56	0.92	3.32134e-05	1.06311	27.5813	26.2911	26.3739	26.4312	28.3761	28.2323	27.664	27.7524	-1.33684	Rrp9	Triobp	Rrp9
ENSMUSG00000060950	Trmt61a	43.2	40.76	39.11	28.96	9.67	14.48	15.17	15.84	-1.301	1.07425e-08	-1.32931	24.0457	23.031	23.4481	23.5398	24.7203	25.7896	24.5194	24.3863	-1.33776	Reep4	Trmt61a	Reep4
ENSMUSG00000045482	Trrap	73.36	52.28	53.01	58.64	26.38	39.83	38.22	31.67	-0.653	0.000238849	-2.66134	28.1746	27.5198	27.5298	28.0484	29.3184	29.4789	29.3339	28.4927	-1.33786	Utp20	Trrap	Utp20
ENSMUSG00000038172	Ttc39b	78.25	85.95	77.35	70.23	31.66	26.25	29.12	24.89	-1.34	3.59727e-19	-1.12738	28.0593	28.2606	28.6481	28.617	29.6452	29.2519	29.7058	30.3536	-1.3429	Tpst2	Ttc39b	Tpst2
ENSMUSG00000038379	Ttk	145.9	190.5	144.27	141.18	101.12	93.24	106.76	119.15	-0.374	0.00138531	-3.77289	26.8657	26.1605	26.6046	26.5948	28.1005	28.1337	27.7059	27.6619	-1.3441	Dctpp1	Ttk	Dctpp1
ENSMUSG00000058672	Tubb2a	17.93	15.95	13.04	22.44	138.06	145.74	147.41	169.68	3.221	6.18114e-107	1.15897	25.0781	24.8414	24.672	24.8658	26.6027	26.3102	26.3864	25.5373	-1.34484	Ddx10	Tubb2a	Ddx10
ENSMUSG00000062380	Tubb3	15.49	18.61	16.51	15.2	69.47	49.79	63.09	49.77	1.949	2.33714e-22	2.06206	24.0108	24.0437	22.7084	23.9524	25.0407	25.295	24.5837	25.1828	-1.34675	Rad9a	Tubb3	Rad9a
ENSMUSG00000057130	Txnl4a	112.48	120.5	126.02	119.46	51.88	55.22	42.46	52.79	-1.127	2.12468e-21	-1.02486	23.2054	23.7076	23.4548	23.7246	25.118	24.9602	24.0062	25.4313	-1.35583	Fignl1	Txnl4a	No
ENSMUSG00000029223	Uchl1	53.79	47.85	48.67	49.95	7.03	8.15	4.25	2.26	-3.098	2.77369e-39	-3.87598	25.0994	23.642	24.0571	23.2723	25.1103	25.2174	25.8303	25.3576	-1.3612	Isg20	Uchl1	No
ENSMUSG00000030421	Uri1	116.56	102.78	103.42	114.39	153.88	132.16	134.67	134.99	0.465	5.12231e-06	1.74968	26.4909	27.2135	27.5395	27.1637	28.3893	28.6434	28.2951	28.5329	-1.36326	Itga3	Uri1	Itga3
ENSMUSG00000030107	Usp18	100.25	99.24	87.78	94.84	13.19	15.39	16.38	17.34	-2.468	7.11171e-57	-2.42719	23.8465	23.3473	23.6424	25.2717	25.9979	25.2673	25.196	25.12	-1.36834	Mea1	Usp18	Mea1
ENSMUSG00000004356	Utp20	85.58	117.85	85.17	104.25	46.61	34.4	43.07	68.62	-0.981	3.49693e-08	-1.33786	25.4145	24.9869	25.4362	25.5888	26.6023	26.9626	26.5546	26.8601	-1.3883	Taf9;Taf9b	Utp20	No
ENSMUSG00000035575	Utp6	80.69	73.54	99.94	78.19	34.29	58.84	45.5	58.07	-0.596	0.000317461	-1.18837	31.7994	31.7439	31.5272	31.6229	33.0457	33.0945	33.0908	33.0302	-1.39195	Rnf213	Utp6	Rnf213
ENSMUSG00000030403	Vasp	49.72	74.43	60.84	56.47	125.75	129.45	121.32	110.86	1.176	5.50793e-21	1.29461	24.7662	24.9794	23.0997	23.7203	25.472	25.8598	25.7563	25.0602	-1.39564	Capn6	Vasp	No
ENSMUSG00000027962	Vcam1	125.52	128.48	125.15	133.21	400.1	388.34	403.4	404.21	1.769	1.81211e-133	1.08872	25.97	26.0808	26.0693	26.1061	27.3394	27.539	27.5004	27.4347	-1.39682	Gbe1	Vcam1	Gbe1
ENSMUSG00000021614	Vcan	284.46	231.26	263.33	270.77	1056.97	1079.94	1163.49	999.21	2.163	2.35287e-213	2.85233	24.5938	24.3452	23.5708	23.157	26.0206	24.8971	25.1532	25.1851	-1.39731	Immt	Vcan	No
ENSMUSG00000046230	Vps13a	83.95	85.95	84.3	106.43	22.86	15.39	28.51	26.39	-1.763	1.12394e-25	-2.62276	27.3988	27.3213	27.4296	27.0554	29.0403	28.5553	28.6424	28.5607	-1.39842	Pgam5	Vps13a	Pgam5
ENSMUSG00000048832	Vps37c	2.45	3.54	0.87	2.17	5.28	1.81	6.67	6.03	1.283	0.0246852	1.41646	25.7339	25.5422	24.8217	23.4098	26.1677	26.4153	26.2455	26.2828	-1.40094	Noa1	Vps37c	No
ENSMUSG00000031913	Vps4a	41.57	20.38	43.45	23.17	60.67	69.7	49.14	70.89	1.089	1.27287e-06	1.20655	25.0064	23.727	23.0325	23.2142	26.0856	24.8711	24.898	24.7308	-1.40134	Nudt14	Vps4a	Nudt14
ENSMUSG00000028868	Wasf2	139.38	135.57	146.01	136.11	157.4	162.94	189.26	153.84	0.386	7.57938e-05	1.13604	23.5869	23.9056	23.7952	23.7487	25.8614	25.3624	23.9851	25.4335	-1.40147	Sptan1	Wasf2	Sptan1
ENSMUSG00000024312	Wdr46	57.06	58.48	72.13	61.54	37.81	25.35	32.76	18.1	-0.961	4.37611e-07	-1.89468	26.4333	25.722	26.0577	26.2421	27.5256	27.4253	27.3743	27.7503	-1.4051	Adi1	Wdr46	Adi1
ENSMUSG00000040483	Xaf1	63.58	77.97	43.45	53.57	12.31	9.05	10.31	7.54	-2.432	2.08117e-22	-2.54859	26.4629	25.447	26.9768	26.3972	27.9609	27.5436	28.0423	27.3583	-1.40533	Pwp2	Xaf1	Pwp2
ENSMUSG00000024066	Xdh	39.12	36.33	40.85	45.61	128.38	146.65	162.57	94.26	1.903	4.96732e-33	1.72622	27.7074	28.1198	27.5701	28.0611	29.065	29.4959	29.3405	29.195	-1.40948	Psmb8	Xdh	Psmb8
ENSMUSG00000018326	Ywhab	851.75	806.31	770.87	856.47	546.95	549.47	564.15	542.97	-0.446	5.70713e-17	1.90856	23.6409	24.0556	24.4526	23.8109	25.6496	25.5341	25.4145	25.0054	-1.41093	Med23	Ywhab	No
ENSMUSG00000043542	Zc2hc1a	22.82	15.95	18.25	21.72	101.12	138.5	107.37	132.72	2.718	7.81822e-58	1.68171	26.8736	26.9523	26.872	27.0031	28.6085	27.7629	28.4067	28.5701	-1.41179		Zc2hc1a	No
ENSMUSG00000029427	Zcchc8	30.97	23.92	38.24	30.41	16.71	16.29	19.41	18.85	-0.648	0.0034906	-1.25508	24.8663	23.2922	24.4574	24.407	26.1311	25.1786	25.6454	25.7297	-1.4155	Orc2	Zcchc8	Orc2
													22.8114	23.9761	23.6967	24.9165	25.4464	25.4829	24.9665	25.1752	-1.41755	F11r	No	F11r
													24.973	23.9714	23.073	24.8731	25.4125	25.3289	26.0148	25.8051	-1.41772	Gbp9	No	Gbp9
													26.2528	26.5015	26.4555	26.9171	28.3164	27.7918	27.7869	27.9508	-1.42979	Tex30	No	Tex30
													25.4934	25.234	25.3886	25.5841	27.0304	27.0318	26.6195	26.7679	-1.43738	Ezh2	No	Ezh2
													27.8685	27.7506	27.5637	27.5432	29.005	29.3563	29.0651	29.0719	-1.44309	Diaph3;Diap3	No	No
													23.4849	25.4282	25.0666	23.8006	25.8624	26.1099	25.8099	25.8071	-1.45226	LRWD1;Lrwd1	No	No
													23.5811	23.3634	23.5964	23.1453	25.0912	24.7575	25.1221	24.5275	-1.45301	Agpat1	No	Agpat1
													23.9457	23.8206	25.4527	25.7337	26.2618	26.1975	25.8086	26.5305	-1.46141	Dsn1	No	Dsn1
													24.7283	25.5098	24.5747	26.0359	26.0348	26.9045	26.3024	27.463	-1.46403	Haus6	No	Haus6
													31.4499	31.3048	31.516	31.6066	32.9839	33.0325	33.0031	32.7144	-1.46412	Pdlim1	No	Pdlim1
													28.8646	28.729	28.0035	28.8433	30.1076	29.9562	30.1529	30.0976	-1.46848	B2m	No	B2m
													23.1851	23.6843	23.1135	25.3502	25.4335	25.0275	25.7346	25.0476	-1.47752		No	No
													26.6129	25.9505	26.6036	25.9532	28.3451	27.663	27.6159	27.4092	-1.47823	Cdk7	No	No
													24.6711	24.3645	23.4922	23.3798	25.849	25.3811	24.8962	25.7162	-1.4837	Synj1	No	No
													27.3198	27.0013	26.9905	27.4561	28.6171	28.833	28.8217	28.4392	-1.48581	Pus1	No	Pus1
													24.2682	23.7363	24.1053	25.103	25.9451	26.1136	25.2227	25.9242	-1.49824	Haus1	No	Haus1
													24.5493	23.5008	22.8692	24.0517	25.0826	25.0074	25.2222	25.6604	-1.50039	Atm	No	Atm
													25.5827	25.4997	25.5841	25.333	26.9741	27.2147	26.7675	27.045	-1.50044	Ddx49	No	No
													24.4145	23.2663	24.7738	24.4212	25.582	25.6005	25.7803	25.9152	-1.50057	Skp2	No	No
													25.8838	24.8181	25.1709	25.1679	27.3697	27.4018	25.5892	26.7053	-1.50631	Atp6ap2	No	Atp6ap2
													27.9768	27.5419	27.9196	28.0328	29.5719	29.3711	29.4004	29.1689	-1.51027	Aatf	No	Aatf
													26.8019	24.775	25.8351	26.5571	27.2511	27.5825	27.5123	27.7007	-1.51938	Naf1	No	Naf1
													29.4322	29.8662	29.2237	29.8182	30.9454	31.374	31.3708	30.7751	-1.53126	Nes	No	Nes
													24.46	23.0168	23.672	22.1837	25.0893	24.414	25.071	24.9294	-1.54278	Ubxn4	No	No
													25.9249	23.7966	24.6267	25.9082	26.543	27.4454	26.2994	26.1553	-1.54666	Rsl24d1	No	Rsl24d1
													22.8511	23.7816	23.5128	23.1029	25.476	25.1553	24.6654	24.1544	-1.55067	Apba3	No	Apba3
													24.5991	24.3311	23.977	22.631	25.6183	24.8885	25.9761	25.2595	-1.55108	Kctd10	No	Kctd10
													27.5275	26.9893	27.1789	27.4078	28.3532	29.1805	28.8836	28.9124	-1.55656	Morf4l1	No	Morf4l1
													22.6648	22.9029	25.1506	24.4652	25.3485	25.7321	25.0293	25.3015	-1.55697	Ctgf	No	No
													25.7425	25.7291	24.1041	25.6683	26.7327	26.4522	27.0746	27.2155	-1.55772	Gbp10;Gbp6	No	No
													23.6886	22.8459	23.7535	22.8278	23.8639	25.4168	25.0456	25.0248	-1.55881	Jun	No	Jun
													25.5403	23.7332	25.802	23.4818	26.0028	26.3376	26.1087	26.3564	-1.56206	Ccna2	No	No
													23.4314	22.5541	23.4905	23.4205	24.9266	25.2972	24.8798	24.065	-1.568	Met	No	No
													26.7334	27.5862	26.8501	27.0771	28.727	29.0388	28.6745	28.1141	-1.5769	Prps2	No	Prps2
													23.5511	24.92	22.2583	23.6498	25.1095	24.5334	26.0479	24.9995	-1.57777	Dtl	No	Dtl
													22.4237	24.7387	23.5483	23.273	25.4704	25.1195	25.0844	24.6492	-1.58497	Dhcr24	No	Dhcr24
													29.2201	29.137	28.0568	27.7582	30.3166	30.0443	30.4144	29.755	-1.58952	Bst2	No	Bst2
													25.3083	25.4058	25.3736	25.4277	26.7585	26.7356	27.1966	27.1958	-1.59276	Dck	No	Dck
													31.1475	31.2847	31.1756	31.2778	32.9958	32.7448	32.7675	32.7934	-1.60395	Tfrc	No	Tfrc
													26.4777	26.4592	26.2862	26.1336	28.1547	27.872	27.7701	28.0199	-1.61501	Tacc3	No	No
													26.5852	26.7338	26.4379	26.8307	28.1078	28.5844	28.3365	28.0577	-1.62469	Dpp7	No	Dpp7
													22.1623	23.4253	23.64	23.1677	25.1999	24.7187	24.5253	24.4565	-1.62624	Igsf10	No	Igsf10
													25.4221	25.2776	25.5875	25.8516	26.6301	27.5549	27.5163	26.9944	-1.6392	Ermp1	No	Ermp1
													27.8246	27.7743	28.3571	27.9222	29.6243	29.518	29.6959	29.6279	-1.64697	Rbm19	No	Rbm19
													24.0477	24.0652	23.3071	22.6855	25.1338	25.7734	24.8746	24.9546	-1.65773	Abhd6	No	No
													24.4453	23.749	23.1873	22.5704	25.9164	24.9607	24.9865	24.721	-1.65817	Hyal2	No	No
													23.4144	25.3254	22.8965	23.8987	25.0923	25.7599	25.5049	25.8872	-1.67734	Bub1b	No	No
													24.4718	24.442	24.0294	24.0109	25.6044	26.1148	25.8589	26.1127	-1.68414	Ptpn21	No	Ptpn21
													26.8242	27.0467	25.6546	26.8241	28.1675	28.2991	28.6349	27.9867	-1.68467	Mepce	No	Mepce
													27.2277	26.7081	27.0027	27.016	28.6987	28.739	28.6419	28.6566	-1.69545	Ncapd3	No	Ncapd3
													23.9237	23.4308	24.9898	24.056	25.683	25.6607	26.109	25.7339	-1.6966	Ddx41	No	No
													24.3324	22.5709	24.5662	23.2524	25.3665	25.5409	25.6951	24.9177	-1.69956	Lyrm4	No	Lyrm4
													25.4028	25.0549	24.5133	24.8427	26.9285	26.6858	26.0397	26.986	-1.70656	Tgtp1	No	No
													25.1164	26.4734	24.482	24.3886	26.6316	26.9808	26.9362	26.7987	-1.72169	Slc7a1	No	Slc7a1
													26.2273	25.2325	25.9303	25.6124	27.3196	27.9445	27.4519	27.2341	-1.73691	Smc6	No	Smc6
													28.2863	28.2065	27.8497	27.7813	29.8583	29.6754	30.0381	29.5876	-1.75887	Oas1a;Oas1g	No	No
													27.5727	27.3366	26.7354	27.983	29.7979	28.7495	29.2804	28.852	-1.76301	Chchd2;Zbed5	No	No
													25.9678	24.4219	25.479	25.8767	28.217	27.1372	27.3387	26.1137	-1.7653	Ngdn	No	No
													25.5204	25.0612	24.4237	24.8852	26.7563	27.0866	26.7822	26.328	-1.76567	Ddx55	No	Ddx55
													25.4601	25.5902	23.5935	25.9887	26.7817	26.8425	27.0482	27.0628	-1.77569	Rprd1a	No	No
													26.1639	26.4338	26.0699	23.6347	27.3518	27.6136	27.2654	27.2354	-1.79102	Polr2f	No	No
													24.4863	24.3812	23.8075	23.0257	24.9795	25.9271	25.9973	25.9681	-1.79281	Akap8l	No	Akap8l
													25.2016	24.5865	24.6591	23.3346	26.5884	25.2101	26.4358	26.7414	-1.79846	Atad5	No	Atad5
													25.7775	25.6025	24.9831	25.3384	27.131	26.903	27.6611	27.2199	-1.8034	Dusp9	No	Dusp9
													26.5869	27.0567	26.7723	26.4297	28.4262	28.3246	28.4827	28.8322	-1.805	Fam107b	No	Fam107b
													24.9441	23.27	23.6172	24.176	25.7015	26.2655	25.7587	25.5072	-1.80643	Slu7	No	Slu7
													26.172	24.9876	25.4341	26.0437	27.8604	27.5194	27.0422	27.4724	-1.81425	Farp2	No	Farp2
													24.2031	25.1436	23.273	25.1799	26.2774	26.7922	26.0452	25.9699	-1.82125	Elof1	No	Elof1
													25.0263	23.5751	23.1299	24.9397	25.6314	26.5247	26.4496	25.3855	-1.83005	Med12	No	Med12
													26.944	25.3282	27.295	26.8225	29.0088	28.1988	29.0131	27.5592	-1.84757	Noc4l	No	Noc4l
													27.4553	26.94	27.1962	26.7887	29.0339	29.4736	28.6345	28.6415	-1.85086	Dhx37	No	Dhx37
													22.0311	24.082	23.737	23.6965	25.5895	25.9707	24.7403	24.705	-1.86474	Mum1	No	No
													23.5162	24.3559	24.1327	25.4176	25.6589	26.7735	25.7036	26.7679	-1.87037	Ube2s	No	No
													26.2368	25.9249	26.1102	26.4059	28.0699	28.0091	28.1571	27.9904	-1.88719	Col8a1	No	Col8a1
													23.903	23.6213	24.244	25.2373	25.9084	26.4277	25.9213	26.3173	-1.89224	Gvin1	No	No
													21.7153	22.5487	23.8254	22.6567	23.4403	24.0768	25.8293	24.9754	-1.89393	Acy3	No	Acy3
													26.2126	26.3873	25.7403	25.2033	28.2813	28.0024	27.9039	26.9346	-1.89468	Wdr46	No	Wdr46
													23.7576	24.1029	22.9263	22.4071	25.3638	25.4432	25.2992	24.7093	-1.9054	Ska2	No	No
													27.2108	27.1433	26.5939	27.741	29.085	28.8222	29.5262	28.8923	-1.90919	Mllt4	No	No
													25.9936	24.9458	25.7582	22.9008	27.0318	26.5038	26.6651	27.0913	-1.9234	Med31	No	Med31
													22.8872	23.1242	23.1551	24.839	25.5036	25.591	25.1307	25.5886	-1.95213	Nrp2	No	Nrp2
													25.8264	25.7895	26.1036	26.835	28.9102	27.8683	28.203	27.3821	-1.95227	Dnttip2	No	Dnttip2
													28.3567	28.5173	28.4531	28.2747	29.9704	30.7535	30.3971	30.2965	-1.95393	Cotl1	No	Cotl1
													24.6973	23.6307	24.2052	23.9131	25.2918	27.5161	25.9107	25.594	-1.96658	Rtp4	No	Rtp4
													30.1244	27.1128	29.1229	28.2395	30.9419	30.217	30.1339	31.2449	-1.98454	Arid1a	No	Arid1a
													24.4946	24.6406	23.5301	25.2865	26.9919	26.0804	26.7502	26.0797	-1.9876	Whsc1	No	No
													22.7635	24.6295	23.9781	23.9506	25.9407	25.6521	26.1072	25.6141	-1.99811	I830012O16Rik;Ifit3	No	No
													25.8519	26.0678	23.5617	26.6391	27.277	28.1866	27.3582	27.2944	-1.99892	Gcc2	No	Gcc2
													27.4462	26.9428	25.7176	27.2342	28.8445	29.0377	29.1662	28.2996	-2.00183	Lgmn	No	Lgmn
													27.8909	27.8767	27.4912	27.2924	29.379	29.6328	30.0997	29.49	-2.01258	Ivd	No	Ivd
													23.4855	24.9269	24.9303	25.4478	27.2324	26.1746	26.7686	26.7045	-2.02243	Kif20b	No	No
													22.8998	22.6982	23.5559	24.5922	25.8042	25.9695	24.7875	25.3387	-2.03842	Tdp1	No	No
													25.1765	23.7318	23.883	25.6146	25.942	26.1923	27.117	27.3233	-2.0422	Aldoc	No	No
													25.1793	23.1297	22.7529	24.4835	26.2442	25.3309	25.994	26.2232	-2.06169	Myo6	No	No
													27.0661	26.9809	27.0839	26.7695	28.9251	29.3862	28.7784	29.0633	-2.06317	Sbno1	No	Sbno1
													23.4827	22.5822	23.9064	24.632	25.6264	26.1431	25.5761	25.5197	-2.0655	Loxl3	No	Loxl3
													24.1257	23.2507	23.497	23.5191	25.5995	25.8683	25.8174	25.3766	-2.06732	Kif18b	No	Kif18b
													27.4369	27.6889	26.3264	27.586	29.2957	29.4309	29.2442	29.3762	-2.0772	Mlkl	No	Mlkl
													25.6039	25.3136	24.3017	24.2895	27.5313	25.9268	26.7035	27.7071	-2.09	Cmpk2	No	No
													23.8159	23.6403	22.6291	24.0866	25.6667	25.6752	25.1631	26.0329	-2.09149	Ezr	No	Ezr
													24.2411	25.0793	25.0894	24.7481	27.1536	26.8923	26.2469	27.2594	-2.09859	Adat2	No	Adat2
													24.6367	23.7273	24.6305	25.0238	26.6878	26.7951	26.7093	26.2408	-2.10366	Bckdhb	No	No
													26.4798	26.464	23.4087	26.6707	27.0546	28.2411	28.6022	27.543	-2.10443	Mcam	No	Mcam
													26.2102	24.5921	25.0835	25.712	26.7986	28.0032	28.08	27.181	-2.11627	Cwf19l1	No	Cwf19l1
													27.6845	27.6558	26.7878	27.919	29.1947	29.909	30.161	29.248	-2.11642	Tapbp	No	Tapbp
													26.2743	26.3102	26.405	26.8251	28.4192	29.2804	28.3006	28.2954	-2.12024	Esf1	No	Esf1
													28.7918	28.2492	28.9667	28.6996	30.9547	31.0254	30.4929	30.7899	-2.1389	Hells	No	Hells
[truncated: 83 more rows]

## Sheet: heatmap_common_572
EnsemblGeneID	Symbol	wt1_unique	wt2_unique	wt3_unique	wt4_unique	ko1_unique	ko2_unique	ko3_unique	ko4_unique	logFC_KOvsWT	FDR_KOvsWT	KO1	KO2	KO3	KO4	WT1	WT2	WT3	WT4	Student's T-test Difference KOvsWT
[truncated: 572 more rows]

[truncated: 7 more sheets: upup_317, GO_KEGG_upup_317, upup_317_BP_PLOT_top15, dwdw_213, GO_KEGG_dwdw_213, dwdw_213_BP_PLOT_top15, opposite_42]
