# Supplementary material for: Ezrin defines TSC complex activation at endosomal compartments through EGFR–AKT signaling
Source: eLife. 2025 Feb 12;13:RP98523. doi: 10.7554/eLife.98523 (PMC11820125; doi:10.7554/eLife.98523)
Supplement: Supplementary file 2. [file elife-98523-supp2.xlsx]

## Sheet: common_573
Protein names	Gene names	Student's T-test Difference KO_WT	EnsemblGeneID	Symbol	logFC_EXP1vsCTR1	FDR_EXP1vsCTR1
UPF0769 protein C21orf59 homolog	1110004E09Rik	-1.08662	ENSMUSG00000022972	1110004E09Rik	0.464	0.0211528
Protein C19orf12 homolog	1600014C10Rik	3.49693	ENSMUSG00000054676	1600014C10Rik	2.189	1.31142e-09
	2200002D01Rik	1.70637	ENSMUSG00000030587	2200002D01Rik	8.757	1.97379e-58
	2210016F16Rik	2.19514	ENSMUSG00000021550	2210016F16Rik	3.029	1.53147e-19
UPF0317 protein C14orf159 homolog, mitochondrial	9030617O03Rik	3.53914	ENSMUSG00000021185	9030617O03Rik	4.392	7.88608e-29
Protein AATF	Aatf	-1.51027	ENSMUSG00000018697	Aatf	-0.711	0.00669579
4-aminobutyrate aminotransferase, mitochondrial	Abat	1.19478	ENSMUSG00000057880	Abat	4.404	1.2052e-09
	Abcc4	2.36677	ENSMUSG00000032849	Abcc4	1.316	2.38248e-06
ATP-binding cassette sub-family G member 2	Abcg2	1.91952	ENSMUSG00000029802	Abcg2	0.925	6.29589e-08
Alpha/beta hydrolase domain-containing protein 17B	Abhd17b	-1.20121	ENSMUSG00000047368	Abhd17b	-1.124	4.66473e-20
Medium-chain specific acyl-CoA dehydrogenase, mitochondrial	Acadm	1.17712	ENSMUSG00000062908	Acadm	2.062	4.64288e-21
Short/branched chain specific acyl-CoA dehydrogenase, mitochondrial	Acadsb	1.25622	ENSMUSG00000030861	Acadsb	1.441	6.32781e-21
Acyl-coenzyme A thioesterase 1	Acot1	2.80595	ENSMUSG00000072949	Acot1	5.269	5.3612e-29
Lysophosphatidic acid phosphatase type 6	Acp6	-2.52817	ENSMUSG00000028093	Acp6	-2.284	9.74172e-17
Prostatic acid phosphatase	Acpp	4.13896	ENSMUSG00000032561	Acpp	7.091	9.44038e-20
Long-chain-fatty-acid--CoA ligase 1	Acsl1	1.40366	ENSMUSG00000018796	Acsl1	0.997	1.90666e-08
Long-chain-fatty-acid--CoA ligase 4	Acsl4	1.21111	ENSMUSG00000031278	Acsl4	1.528	1.62987e-27
Actin, gamma-enteric smooth muscle	Actg2	5.25658	ENSMUSG00000059430	Actg2	7.884	0
	Actn1	2.89846	ENSMUSG00000015143	Actn1	-0.557	2.7305e-15
N-acyl-aromatic-L-amino acid amidohydrolase (carboxylate-forming)	Acy3	-1.89393	ENSMUSG00000024866	Acy3	-1.818	0.000503247
Disintegrin and metalloproteinase domain-containing protein 9	Adam9	1.36718	ENSMUSG00000031555	Adam9	0.845	0.00290855
Double-stranded RNA-specific adenosine deaminase	Adar	-1.17491	ENSMUSG00000027951	Adar	-2.038	1.7327e-17
tRNA-specific adenosine deaminase 2	Adat2	-2.09859	ENSMUSG00000019808	Adat2	-2.372	2.99925e-22
Alcohol dehydrogenase class 4 mu/sigma chain	Adh7	-3.15677	ENSMUSG00000055301	Adh7	-8.426	1.21022e-246
1,2-dihydroxy-3-keto-5-methylthiopentene dioxygenase	Adi1	-1.4051	ENSMUSG00000020629	Adi1	-1.862	1.16116e-10
Adipocyte enhancer-binding protein 1	Aebp1	2.24551	ENSMUSG00000020473	Aebp1	1.079	5.96073e-38
N(4)-(beta-N-acetylglucosaminyl)-L-asparaginase;Glycosylasparaginase alpha chain;Glycosylasparaginase beta chain	Aga	1.17999	ENSMUSG00000031521	Aga	1.369	4.86229e-08
1-acyl-sn-glycerol-3-phosphate acyltransferase alpha	Agpat1	-1.45301	ENSMUSG00000034254	Agpat1	-0.398	0.0180573
	Ahnak2	1.33923	ENSMUSG00000072812	Ahnak2	0.974	4.74179e-25
GTP:AMP phosphotransferase AK3, mitochondrial	Ak3	1.08578	ENSMUSG00000024782	Ak3	0.911	4.53173e-11
A-kinase anchor protein 8-like	Akap8l	-1.79281	ENSMUSG00000002625	Akap8l	-1.699	3.9058e-29
	Akr1c14	1.31229	ENSMUSG00000033715	Akr1c14	4.589	7.22289e-08
Delta-aminolevulinic acid dehydratase	Alad	-1.26241	ENSMUSG00000028393	Alad	-1.588	3.00144e-18
CD166 antigen	Alcam	-4.15978	ENSMUSG00000022636	Alcam	-5.255	2.57135e-116
Aldehyde dehydrogenase, mitochondrial	Aldh2	1.45612	ENSMUSG00000029455	Aldh2	1.242	2.07851e-34
AMP deaminase 3	Ampd3	1.89932	ENSMUSG00000005686	Ampd3	1.177	0.0196526
Ankyrin-3	Ank3	1.03351	ENSMUSG00000069601	Ank3	2.999	8.17253e-116
Aminopeptidase N	Anpep	5.64223	ENSMUSG00000039062	Anpep	2.949	4.31107e-08
Anthrax toxin receptor 1	Antxr1	1.35598	ENSMUSG00000033420	Antxr1	2.04	1.19887e-24
Annexin A1	Anxa1	1.78813	ENSMUSG00000024659	Anxa1	1.939	3.29336e-51
Annexin A6	Anxa6	1.44824	ENSMUSG00000018340	Anxa6	2.339	5.32387e-176
Annexin A7	Anxa7	1.26216	ENSMUSG00000021814	Anxa7	1.434	1.12197e-09
Aldehyde oxidase 1	Aox1	1.78253	ENSMUSG00000063558	Aox1	6.283	2.31449e-12
Amyloid beta A4 precursor protein-binding family A member 3	Apba3	-1.55067	ENSMUSG00000004931	Apba3	-1.4	4.77507e-06
Amyloid beta A4 precursor protein-binding family B member 1-interacting protein	Apbb1ip	1.6924	ENSMUSG00000026786	Apbb1ip	1.955	6.65695e-33
Amyloid-like protein 2	Aplp2	1.6598	ENSMUSG00000031996	Aplp2	0.906	6.05559e-33
	Apol9a	-3.28768	ENSMUSG00000057346	Apol9a	-3.052	5.61305e-67
Amyloid protein-binding protein 2	Appbp2	-1.15938	ENSMUSG00000018481	Appbp2	-1.166	2.03439e-12
ADP-ribosylation factor GTPase-activating protein 3	Arfgap3	1.08306	ENSMUSG00000054277	Arfgap3	2.444	1.38389e-51
Rho GTPase-activating protein 35	Arhgap35	2.13422	ENSMUSG00000058230	Arhgap35	0.627	0.00229434
Rho GDP-dissociation inhibitor 2	Arhgdib	2.37858	ENSMUSG00000030220	Arhgdib	2.889	4.42778e-130
Rho guanine nucleotide exchange factor 40	Arhgef40	1.32482	ENSMUSG00000004562	Arhgef40	0.997	9.42761e-05
AT-rich interactive domain-containing protein 1A	Arid1a	-1.98454	ENSMUSG00000007880	Arid1a	-1.041	3.74128e-11
Arpin	Arpin	1.59515	ENSMUSG00000039043	Arpin	0.875	0.00859711
ATPase family AAA domain-containing protein 5	Atad5	-1.79846	ENSMUSG00000017550	Atad5	-1.33	6.39069e-20
Autophagy-related protein 101	Atg101	1.38815	ENSMUSG00000037204	Atg101	0.387	0.00241126
Atlastin-3	Atl3	1.01059	ENSMUSG00000024759	Atl3	0.738	7.77083e-06
Serine-protein kinase ATM	Atm	-1.50039	ENSMUSG00000034218	Atm	-0.778	4.01297e-11
Sodium/potassium-transporting ATPase subunit beta-1	Atp1b1	2.34241	ENSMUSG00000026576	Atp1b1	1.957	5.8433e-25
Calcium-transporting ATPase	Atp2b4	1.40412	ENSMUSG00000026463	Atp2b4	3.216	1.73967e-38
Renin receptor	Atp6ap2	-1.50631	ENSMUSG00000031007	Atp6ap2	-0.403	1.32085e-05
ATR-interacting protein	Atrip	2.40242	ENSMUSG00000025646	Atrip	-0.759	0.00794034
Methylglutaconyl-CoA hydratase, mitochondrial	Auh	1.25364	ENSMUSG00000021460	Auh	0.903	0.000458604
Beta-2-microglobulin	B2m	-1.46848	ENSMUSG00000060802	B2m	-0.536	9.14638e-29
BAG family molecular chaperone regulator 2	Bag2	1.19286	ENSMUSG00000042215	Bag2	0.957	0.0170682
BAG family molecular chaperone regulator 3	Bag3	1.13375	ENSMUSG00000030847	Bag3	1.579	1.66193e-24
Bromodomain adjacent to zinc finger domain protein 1A	Baz1a	-1.28643	ENSMUSG00000035021	Baz1a	-0.887	1.08099e-27
RUS1 family protein C16orf58 homolog	BC017158	3.01065	ENSMUSG00000030780	BC017158	0.996	0.00172721
Branched-chain-amino-acid aminotransferase, cytosolic;Branched-chain-amino-acid aminotransferase	Bcat1	4.09579	ENSMUSG00000030268	Bcat1	-0.987	8.22901e-22
Mitochondrial chaperone BCS1	Bcs1l	1.06914	ENSMUSG00000026172	Bcs1l	0.61	0.0273915
Protein bicaudal C homolog 1	Bicc1	2.18529	ENSMUSG00000014329	Bicc1	2.136	7.57173e-104
Flavin reductase (NADPH)	Blvrb	1.11241	ENSMUSG00000040466	Blvrb	0.623	0.00514965
Basigin	Bsg	-2.33081	ENSMUSG00000023175	Bsg	-0.603	6.41272e-11
Bone marrow stromal antigen 2	Bst2	-1.58952	ENSMUSG00000046718	Bst2	-0.914	1.65764e-14
Protein BUD31 homolog	Bud31	-1.16719	ENSMUSG00000038722	Bud31	-1.052	1.49937e-17
Complement C3;Complement C3 beta chain;C3-beta-c;Complement C3 alpha chain;C3a anaphylatoxin;Acylation stimulating protein;Complement C3b alpha chain;Complement C3c alpha chain fragment 1;Complement C3dg fragment;Complement C3g fragment;Complement C3d fragment;Complement C3f fragment;Complement C3c alpha chain fragment 2	C3	5.64524	ENSMUSG00000024164	C3	1.994	9.97641e-69
	Cald1	5.07598	ENSMUSG00000029761	Cald1	0.936	8.76901e-65
Calcium/calmodulin-dependent protein kinase type II subunit gamma	Camk2g	1.27022	ENSMUSG00000021820	Camk2g	1.72	1.6674e-20
Caspase-3;Caspase-3 subunit p17;Caspase-3 subunit p12	Casp3	1.14938	ENSMUSG00000031628	Casp3	1.277	4.78129e-22
Catalase	Cat	1.02373	ENSMUSG00000027187	Cat	1.535	6.29641e-12
Carbonyl reductase [NADPH] 2	Cbr2	4.01514	ENSMUSG00000025150	Cbr2	5.188	0
Carbonyl reductase [NADPH] 3	Cbr3	4.00449	ENSMUSG00000022947	Cbr3	2.75	4.62236e-22
Coiled-coil domain-containing protein 12	Ccdc12	-1.03851	ENSMUSG00000019659	Ccdc12	1.756	1.20602e-07
Cyclin-H	Ccnh	-1.0406	ENSMUSG00000021548	Ccnh	-0.647	0.000881548
Cyclin-T1	Ccnt1	-1.0015	ENSMUSG00000011960	Ccnt1	-0.839	9.78269e-14
CD109 antigen	Cd109	-1.05948	ENSMUSG00000046186	Cd109	0.78	0.00103258
Monocyte differentiation antigen CD14	Cd14	1.76012	ENSMUSG00000051439	Cd14	4.651	4.08168e-15
Endosialin	Cd248	3.03271	ENSMUSG00000056481	Cd248	4.546	3.63949e-76
CD81 antigen	Cd81	2.3019	ENSMUSG00000037706	Cd81	1.246	1.49044e-53
Cytidine deaminase	Cda	1.97749	ENSMUSG00000028755	Cda	7.817	7.70718e-23
Borealin	Cdca8	-1.16571	ENSMUSG00000028873	Cdca8	-0.82	7.60873e-15
Cadherin-11	Cdh11	1.59047	ENSMUSG00000031673	Cdh11	1.8	3.21502e-96
Cadherin-2	Cdh2	-2.9487	ENSMUSG00000024304	Cdh2	-2.569	5.43081e-43
Cyclin-dependent kinase inhibitor 1B	Cdkn1b	2.49621	ENSMUSG00000003031	Cdkn1b	-0.856	1.70116e-12
Tumor suppressor ARF	Cdkn2a	-5.67928	ENSMUSG00000044303	Cdkn2a	-4.963	0
CCAAT/enhancer-binding protein beta	Cebpb	1.43856	ENSMUSG00000056501	Cebpb	0.435	0.000438828
CCAAT/enhancer-binding protein zeta	Cebpz	-1.08161	ENSMUSG00000024081	Cebpz	-0.86	7.38595e-26
Ceramide synthase 5	Cers5	-1.16341	ENSMUSG00000023021	Cers5	-0.566	1.08796e-07
Chromatin assembly factor 1 subunit A	Chaf1a	-1.13587	ENSMUSG00000002835	Chaf1a	-1.074	8.72457e-19
	Chd3	1.06973	ENSMUSG00000018474	Chd3	1.431	4.31547e-82
Chitinase domain-containing protein 1	Chid1	1.04163	ENSMUSG00000025512	Chid1	1.42	7.1591e-09
Chondroitin sulfate synthase 1	Chsy1	1.18213	ENSMUSG00000032640	Chsy1	1.573	4.07611e-23
Creatine kinase B-type	Ckb	3.82267	ENSMUSG00000001270	Ckb	4.205	5.02752e-13
Clathrin light chain B	Cltb	1.31377	ENSMUSG00000047547	Cltb	0.784	9.8183e-07
COX assembly mitochondrial protein 2 homolog	Cmc2	1.07279	ENSMUSG00000014633	Cmc2	0.98	1.00699e-09
Protein CMSS1	Cmss1	-3.0689	ENSMUSG00000022748	Cmss1	-2.033	2.26359e-15
Cap-specific mRNA (nucleoside-2-O-)-methyltransferase 1	Cmtr1	-1.07045	ENSMUSG00000024019	Cmtr1	-2.669	3.70579e-38
Calponin-1	Cnn1	7.42698	ENSMUSG00000001349	Cnn1	7.576	9.25647e-105
Collagen alpha-1(XII) chain	Col12a1	3.54062	ENSMUSG00000032332	Col12a1	4.506	1.34262e-164
Collagen alpha-1(XIV) chain	Col14a1	1.20107	ENSMUSG00000022371	Col14a1	7.604	3.14553e-24
Collagen alpha-1(XVIII) chain;Endostatin	Col18a1	2.08101	ENSMUSG00000001435	Col18a1	2.358	7.60873e-15
Collagen alpha-1(I) chain	Col1a1	1.1891	ENSMUSG00000001506	Col1a1	1.695	4.65599e-170
Collagen alpha-2(I) chain	Col1a2	1.0275	ENSMUSG00000029661	Col1a2	1.614	7.27085e-286
Collagen alpha-1(II) chain;Collagen alpha-1(II) chain;Chondrocalcin	Col2a1	4.34126	ENSMUSG00000022483	Col2a1	10.085	0
Collagen alpha-1(III) chain	Col3a1	1.63917	ENSMUSG00000026043	Col3a1	4.177	0
Collagen alpha-1(V) chain	Col5a1	2.11842	ENSMUSG00000026837	Col5a1	1.204	7.3894e-42
Collagen alpha-1(VIII) chain;Vastatin	Col8a1	-1.88719	ENSMUSG00000068196	Col8a1	-0.437	7.34424e-07
Coactosin-like protein	Cotl1	-1.95393	ENSMUSG00000031827	Cotl1	-1.556	2.28731e-25
Ceruloplasmin	Cp	4.53578	ENSMUSG00000003617	Cp	4.161	7.37541e-112
Carboxypeptidase E	Cpe	2.45372	ENSMUSG00000037852	Cpe	2.181	3.57124e-111
Copine-8	Cpne8	2.45696	ENSMUSG00000052560	Cpne8	2.346	4.28799e-20
Cleavage and polyadenylation specificity factor subunit 2	Cpsf2	-1.11984	ENSMUSG00000041781	Cpsf2	-0.989	9.9711e-22
Carnitine O-palmitoyltransferase 1, liver isoform	Cpt1a	1.67492	ENSMUSG00000024900	Cpt1a	0.896	2.58459e-05
Cellular retinoic acid-binding protein 1	Crabp1	-11.8529	ENSMUSG00000032291	Crabp1	-6.007	0
Cysteine-rich protein 1	Crip1	1.37434	ENSMUSG00000006360	Crip1	3.917	5.99475e-26
Cysteine-rich protein 2	Crip2	-5.69303	ENSMUSG00000006356	Crip2	-3.236	2.47055e-38
Cytokine receptor-like factor 1	Crlf1	2.51338	ENSMUSG00000007888	Crlf1	3.322	9.60105e-137
Alpha-crystallin B chain	Cryab	4.06651	ENSMUSG00000032060	Cryab	2.911	1.63062e-39
Cysteine sulfinic acid decarboxylase	Csad	1.08173	ENSMUSG00000023044	Csad	1.378	4.6713e-15
Chondroitin sulfate proteoglycan 4	Cspg4	2.98428	ENSMUSG00000032911	Cspg4	0.915	0.00358759
Cysteine and glycine-rich protein 1	Csrp1	1.39868	ENSMUSG00000026421	Csrp1	1.107	3.70495e-36
Cysteine and glycine-rich protein 2	Csrp2	1.15738	ENSMUSG00000020186	Csrp2	1.147	1.31908e-22
Cystathionine gamma-lyase	Cth	7.10691	ENSMUSG00000028179	Cth	-0.986	0.00178054
Cathepsin L1;Cathepsin L1 heavy chain;Cathepsin L1 light chain	Ctsl	1.05452	ENSMUSG00000021477	Ctsl	0.823	1.25698e-27
CWF19-like protein 1	Cwf19l1	-2.11627	ENSMUSG00000025200	Cwf19l1	-0.899	0.00904893
Stromal cell-derived factor 1	Cxcl12	4.81044	ENSMUSG00000061353	Cxcl12	4.446	0
C-X-C motif chemokine 5;GCP-2(1-78);GCP-2(9-78)	Cxcl5	1.57943	ENSMUSG00000029371	Cxcl5	1.239	1.44193e-95
Cytochrome b5	Cyb5a	1.71641	ENSMUSG00000024646	Cyb5a	3.445	4.86282e-160
Cytochrome P450 1B1	Cyp1b1	3.41631	ENSMUSG00000024087	Cyp1b1	7.191	0
Death-associated protein 1	Dap	1.39104	ENSMUSG00000039168	Dap	3.146	9.37006e-120
Deoxycytidine kinase	Dck	-1.59276	ENSMUSG00000029366	Dck	-1.855	5.52147e-10
Serine/threonine-protein kinase DCLK1	Dclk1	1.10169	ENSMUSG00000027797	Dclk1	1.634	5.11133e-39
dCTP pyrophosphatase 1	Dctpp1	-1.3441	ENSMUSG00000042462	Dctpp1	-1.087	5.62775e-19
L-xylulose reductase	Dcxr	4.82653	ENSMUSG00000039450	Dcxr	3.211	6.85042e-58
DET1- and DDB1-associated protein 1	Dda1	1.80625	ENSMUSG00000074247	Dda1	0.525	0.000390964
Probable ATP-dependent RNA helicase DDX10	Ddx10	-1.34484	ENSMUSG00000053289	Ddx10	-0.832	1.83524e-17
ATP-dependent RNA helicase DDX24	Ddx24	-1.26058	ENSMUSG00000041645	Ddx24	-0.283	5.05558e-05
Probable ATP-dependent RNA helicase DDX27	Ddx27	-1.01255	ENSMUSG00000017999	Ddx27	-0.963	1.46227e-17
	Ddx31	-2.40255	ENSMUSG00000026806	Ddx31	-0.784	0.00838054
ATP-dependent RNA helicase DDX51	Ddx51	-1.18508	ENSMUSG00000029504	Ddx51	-1.984	2.44968e-07
ATP-dependent RNA helicase DDX54	Ddx54	-1.05763	ENSMUSG00000029599	Ddx54	-1.19	7.18494e-14
ATP-dependent RNA helicase DDX55	Ddx55	-1.76567	ENSMUSG00000029389	Ddx55	-0.989	5.53842e-05
Probable ATP-dependent RNA helicase DDX56	Ddx56	-1.26053	ENSMUSG00000004393	Ddx56	-0.799	3.26957e-08
Probable ATP-dependent RNA helicase DDX58	Ddx58	-1.01696	ENSMUSG00000040296	Ddx58	-0.845	3.77785e-10
Delta(24)-sterol reductase	Dhcr24	-1.58497	ENSMUSG00000034926	Dhcr24	2.949	1.58771e-26
Dehydrogenase/reductase SDR family member 4	Dhrs4	2.14408	ENSMUSG00000022210	Dhrs4	1.803	1.37031e-15
	Dhx37	-1.85086	ENSMUSG00000029480	Dhx37	-1.306	0.00010228
Probable ATP-dependent RNA helicase DHX58	Dhx58	-2.77067	ENSMUSG00000017830	Dhx58	-2.026	6.09431e-05
Probable dimethyladenosine transferase	Dimt1	-1.04091	ENSMUSG00000021692	Dimt1	-1.506	0.00387415
Aspartyl aminopeptidase	Dnpep	1.49095	ENSMUSG00000026209	Dnpep	2.633	1.28156e-58
2-deoxynucleoside 5-phosphate N-hydrolase 1	Dnph1	-5.40448	ENSMUSG00000040658	Dnph1	-0.766	1.19477e-05
Deoxynucleotidyltransferase terminal-interacting protein 2	Dnttip2	-1.95227	ENSMUSG00000039756	Dnttip2	-0.926	1.54845e-26
Diphthine--ammonia ligase	Dph6	-2.93984	ENSMUSG00000057147	Dph6	-1.108	1.33282e-09
Dipeptidyl peptidase 2	Dpp7	-1.62469	ENSMUSG00000026958	Dpp7	-1.006	3.36745e-05
Kinetochore-associated protein DSN1 homolog	Dsn1	-1.46141	ENSMUSG00000027635	Dsn1	-1.026	0.00430426
Destrin	Dstn	1.00181	ENSMUSG00000015932	Dstn	2.442	7.20366e-248
Denticleless protein homolog	Dtl	-1.57777	ENSMUSG00000037474	Dtl	-1.281	6.53186e-23
E3 ubiquitin-protein ligase DTX3L	Dtx3l	-1.17672	ENSMUSG00000049502	Dtx3l	-1.521	8.30869e-17
	Dusp9	-1.8034	ENSMUSG00000031383	Dusp9	-2.43	1.36561e-05
Dynein light chain Tctex-type 3	Dynlt3	-2.6077	ENSMUSG00000031176	Dynlt3	0.795	2.12927e-19
Endothelin-converting enzyme 1	Ece1	-1.03622	ENSMUSG00000057530	Ece1	-0.716	9.30103e-06
Delta(3,5)-Delta(2,4)-dienoyl-CoA isomerase, mitochondrial	Ech1	2.2595	ENSMUSG00000053898	Ech1	1.235	4.08972e-13
Enoyl-CoA hydratase domain-containing protein 2, mitochondrial	Echdc2	-1.08157	ENSMUSG00000028601	Echdc2	-1.124	6.34201e-09
Enoyl-CoA hydratase, mitochondrial	Echs1	1.39146	ENSMUSG00000025465	Echs1	1.156	2.58459e-05
Epidermal growth factor receptor	Egfr	3.92677	ENSMUSG00000020122	Egfr	3.6	7.07885e-49
EH domain-containing protein 2	Ehd2	1.23943	ENSMUSG00000074364	Ehd2	2.688	1.12715e-95
Interferon-induced, double-stranded RNA-activated protein kinase	Eif2ak2	-1.22919	ENSMUSG00000024079	Eif2ak2	-1.658	7.17056e-24
Translation initiation factor eIF-2B subunit alpha	Eif2b1	-1.07897	ENSMUSG00000029388	Eif2b1	-1.002	0.000179412
ETS-related transcription factor Elf-2	Elf2	-1.12988	ENSMUSG00000037174	Elf2	-0.793	3.43755e-05
Transcription elongation factor 1 homolog	Elof1	-1.82125	ENSMUSG00000013822	Elof1	-0.299	0.016666
Embigin	Emb	5.87162	ENSMUSG00000021728	Emb	5.642	1.49959e-171
Protein enabled homolog	Enah	1.07965	ENSMUSG00000022995	Enah	0.411	6.71503e-09
EGF domain-specific O-linked N-acetylglucosamine transferase	Eogt	1.46863	ENSMUSG00000035245	Eogt	0.883	0.000288894
E1A-binding protein p400	Ep400	-2.25233	ENSMUSG00000029505	Ep400	-0.775	4.73547e-07
Mammalian ependymin-related protein 1	Epdr1	1.71212	ENSMUSG00000002808	Epdr1	1.417	7.13204e-08
Ephrin type-B receptor 3	Ephb3	1.11355	ENSMUSG00000005958	Ephb3	1.527	7.15184e-11
Epoxide hydrolase 1	Ephx1	2.74287	ENSMUSG00000038776	Ephx1	3.606	3.29853e-94
Endoplasmic reticulum metallopeptidase 1	Ermp1	-1.6392	ENSMUSG00000046324	Ermp1	-1.194	4.35943e-07
S-formylglutathione hydrolase	Esd	1.39914	ENSMUSG00000021996	Esd	1.471	9.37235e-108
ESF1 homolog	Esf1	-2.12024	ENSMUSG00000045624	Esf1	-1.713	2.92295e-116
Eyes absent homolog 4;Eyes absent homolog	Eya4	2.29073	ENSMUSG00000010461	Eya4	1.228	6.24221e-12
Histone-lysine N-methyltransferase EZH2	Ezh2	-1.43738	ENSMUSG00000029687	Ezh2	-0.367	0.000116229
Ezrin	Ezr	-2.09149	ENSMUSG00000052397	Ezr	-2.208	7.2915e-06
Junctional adhesion molecule A	F11r	-1.41755	ENSMUSG00000038235	F11r	-4.746	1.45203e-33
Fatty acid-binding protein, adipocyte	Fabp4	5.11205	ENSMUSG00000062515	Fabp4	5.756	1.89125e-59
Protein FAM107B	Fam107b	-1.805	ENSMUSG00000026655	Fam107b	-1.811	5.22881e-06
Protein Niban	Fam129a	6.56518	ENSMUSG00000026483	Fam129a	3.968	1.33176e-85
Protein FAM3C	Fam3c	2.89826	ENSMUSG00000029672	Fam3c	1.978	2.34136e-42
FERM, RhoGEF and pleckstrin domain-containing protein 1	Farp1	1.14449	ENSMUSG00000025555	Farp1	0.634	7.9324e-05
FERM, RhoGEF and pleckstrin domain-containing protein 2	Farp2	-1.81425	ENSMUSG00000034066	Farp2	-1.175	0.0382574
Tumor necrosis factor receptor superfamily member 6	Fas	1.0705	ENSMUSG00000024778	Fas	3.202	5.07914e-22
	Fat1	1.97017	ENSMUSG00000070047	Fat1	1.844	3.34693e-17
Fibrillin-1	Fbn1	1.06697	ENSMUSG00000027204	Fbn1	1.234	2.5189e-28
Farnesyl pyrophosphate synthase	Fdps	-1.01534	ENSMUSG00000059743	Fdps	2.359	1.30599e-24
Four and a half LIM domains protein 1	Fhl1	4.00324	ENSMUSG00000023092	Fhl1	2.924	7.95195e-20
Peptidyl-prolyl cis-trans isomerase FKBP11	Fkbp11	1.44684	ENSMUSG00000003355	Fkbp11	0.85	2.10641e-08
Peptidyl-prolyl cis-trans isomerase FKBP7	Fkbp7	2.07677	ENSMUSG00000002732	Fkbp7	2.66	5.37493e-51
Dimethylaniline monooxygenase [N-oxide-forming] 1	Fmo1	3.4584	ENSMUSG00000040181	Fmo1	6.878	3.82728e-14
Fibronectin;Anastellin	Fn1	2.32503	ENSMUSG00000026193	Fn1	1.273	8.88914e-85
Fibronectin type-III domain-containing protein 3A	Fndc3a	1.83027	ENSMUSG00000033487	Fndc3a	2.367	1.55055e-63
Forkhead box protein C1	Foxc1	3.59214	ENSMUSG00000050295	Foxc1	1.875	3.72313e-37
Forkhead box protein P1	Foxp1	1.87972	ENSMUSG00000030067	Foxp1	1.043	3.11578e-51
Follistatin-related protein 1	Fstl1	1.2373	ENSMUSG00000022816	Fstl1	1.806	1.60503e-225
Ferritin heavy chain;Ferritin heavy chain, N-terminally processed	Fth1	1.84018	ENSMUSG00000024661	Fth1	1.568	4.34804e-89
FYVE and coiled-coil domain-containing protein 1	Fyco1	4.63223	ENSMUSG00000025241	Fyco1	1.128	8.82112e-08
Guanidinoacetate N-methyltransferase	Gamt	1.98702	ENSMUSG00000020150	Gamt	3.352	5.11434e-24
Growth arrest-specific protein 1	Gas1	4.84248	ENSMUSG00000052957	Gas1	2.476	6.06632e-124
1,4-alpha-glucan-branching enzyme	Gbe1	-1.39682	ENSMUSG00000022707	Gbe1	0.857	0.00492066
Interferon-induced guanylate-binding protein 2	Gbp2	-1.24377	ENSMUSG00000028270	Gbp2	-1.28	2.46282e-08
	Gbp7	-3.13548	ENSMUSG00000040253	Gbp7	-2.407	5.89082e-52
	Gbp9	-1.41772	ENSMUSG00000029298	Gbp9	-2.773	2.31371e-15
GRIP and coiled-coil domain-containing protein 2	Gcc2	-1.99892	ENSMUSG00000038039	Gcc2	0.401	0.000294041
Gem-associated protein 2	Gemin2	-1.12749	ENSMUSG00000060121	Gemin2	-1.786	1.20602e-07
Glutamine--fructose-6-phosphate aminotransferase [isomerizing] 2	Gfpt2	2.75864	ENSMUSG00000020363	Gfpt2	1.878	1.32912e-06
GDNF family receptor alpha-2	Gfra2	2.26766	ENSMUSG00000022103	Gfra2	7.629	3.14516e-63
Golgi apparatus protein 1	Glg1	1.38687	ENSMUSG00000003316	Glg1	0.936	5.18175e-51
Lactoylglutathione lyase	Glo1	1.04264	ENSMUSG00000024026	Glo1	1.709	1.40717e-40
Glyoxalase domain-containing protein 4	Glod4	1.34246	ENSMUSG00000017286	Glod4	1.886	2.96096e-18
Glutaredoxin-1	Glrx	1.13308	ENSMUSG00000021591	Glrx	2.593	1.10188e-26
Glycolipid transfer protein	Gltp	-1.00633	ENSMUSG00000011884	Gltp	-1.03	1.92933e-06
Ganglioside GM2 activator	Gm2a	1.38522	ENSMUSG00000000594	Gm2a	1.055	2.07922e-05
Mannose-1-phosphate guanyltransferase alpha	Gmppa	1.3248	ENSMUSG00000033021	Gmppa	1.672	9.7658e-11
Guanine nucleotide-binding protein subunit alpha-14	Gna14	1.1612	ENSMUSG00000024697	Gna14	5.561	9.05388e-07
Guanine nucleotide-binding protein G(o) subunit alpha	Gnao1	4.05712	ENSMUSG00000031748	Gnao1	2.619	1.86764e-53
Guanine nucleotide-binding protein G(I)/G(S)/G(O) subunit gamma-12	Gng12	1.17403	ENSMUSG00000036402	Gng12	0.909	7.66352e-25
Golgi integral membrane protein 4	Golim4	1.13057	ENSMUSG00000034109	Golim4	2.037	4.38682e-63
Glypican-1;Secreted glypican-1	Gpc1	1.3522	ENSMUSG00000034220	Gpc1	1.218	1.17343e-28
Gephyrin;Molybdopterin adenylyltransferase;Molybdopterin molybdenumtransferase	Gphn	-3.74486	ENSMUSG00000047454	Gphn	-2.443	7.77367e-19
G patch domain and KOW motifs-containing protein	Gpkow	-1.16039	ENSMUSG00000031148	Gpkow	0.567	0.0359346
Retinoic acid-induced protein 3	Gprc5a	-2.20771	ENSMUSG00000046733	Gprc5a	-2.249	1.44661e-22
Glutathione peroxidase 7	Gpx7	2.00974	ENSMUSG00000028597	Gpx7	1.693	0.000134585
Probable glutathione peroxidase 8	Gpx8	1.00549	ENSMUSG00000021760	Gpx8	1.61	3.70231e-32
Glutathione S-transferase Mu 1	Gstm1	1.30958	ENSMUSG00000058135	Gstm1	2.076	2.87284e-65
Glutathione S-transferase Mu 2	Gstm2	1.18471	ENSMUSG00000040562	Gstm2	1.973	1.34573e-47
Transcription initiation factor IIA subunit 1;Transcription initiation factor IIA alpha chain;Transcription initiation factor IIA beta chain	Gtf2a1	-1.33173	ENSMUSG00000020962	Gtf2a1	-0.691	7.72585e-05
Guanylate kinase	Guk1	1.08965	ENSMUSG00000020444	Guk1	0.554	0.000183524
	H1fx	-1.14367	ENSMUSG00000044927	H1fx	-1.842	4.01584e-32
H-2 class I histocompatibility antigen, D-B alpha chain	H2-D1	-2.85141	ENSMUSG00000073411	H2-D1	-2.741	3.13908e-298
H-2 class I histocompatibility antigen, K-D alpha chain	H2-K1	-3.77952	ENSMUSG00000061232	H2-K1	-3.128	2.87493e-201
Core histone macro-H2A.1	H2afy	-1.26144	ENSMUSG00000015937	H2afy	-0.325	0.000788917
GDH/6PGL endoplasmic bifunctional protein;Glucose 1-dehydrogenase;6-phosphogluconolactonase	H6pd	2.26813	ENSMUSG00000028980	H6pd	1.138	0.00540507
HAUS augmin-like complex subunit 1	Haus1	-1.49824	ENSMUSG00000041840	Haus1	-1.584	5.42816e-14
	Haus6	-1.46403	ENSMUSG00000038047	Haus6	-1.606	7.38791e-25
Heme-binding protein 1	Hebp1	-2.96414	ENSMUSG00000042770	Hebp1	-2.602	4.55787e-15
Lymphocyte-specific helicase	Hells	-2.1389	ENSMUSG00000025001	Hells	-1.711	2.78794e-130
Helicase with zinc finger domain 2	Helz2	-1.21665	ENSMUSG00000027580	Helz2	-1.907	3.84035e-07
Estradiol 17-beta-dehydrogenase 11	Hsd17b11	1.15845	ENSMUSG00000029311	Hsd17b11	2.154	5.68436e-24
Heat shock protein beta-1	Hspb1	8.48905	ENSMUSG00000004951	Hspb1	6.006	2.11615e-112
Heat shock protein beta-6	Hspb6	3.32803	ENSMUSG00000036854	Hspb6	1.761	1.37496e-39
Heat shock protein beta-8	Hspb8	1.07937	ENSMUSG00000041548	Hspb8	2.504	3.19223e-46
Isocitrate dehydrogenase [NADP] cytoplasmic	Idh1	1.25922	ENSMUSG00000025950	Idh1	3.501	5.94184e-35
	Ifi204	1.00406	ENSMUSG00000073489	Ifi204	2.727	5.04177e-46
Interferon-induced helicase C domain-containing protein 1	Ifih1	-3.40303	ENSMUSG00000026896	Ifih1	-2.106	9.95943e-21
Interferon-induced protein with tetratricopeptide repeats 1	Ifit1	-2.73805	ENSMUSG00000034459	Ifit1	-2.777	1.03284e-83
Interferon-induced protein with tetratricopeptide repeats 2	Ifit2	-2.32495	ENSMUSG00000045932	Ifit2	-1.16	0.00186973
Interferon-related developmental regulator 1	Ifrd1	-3.85421	ENSMUSG00000001627	Ifrd1	-1.401	2.95606e-52
Tyrosine-protein kinase receptor;Insulin-like growth factor 1 receptor;Insulin-like growth factor 1 receptor alpha chain;Insulin-like growth factor 1 receptor beta chain	Igf1r	1.32613	ENSMUSG00000005533	Igf1r	1.144	8.30022e-36
Immunoglobulin superfamily member 10	Igsf10	-1.62624	ENSMUSG00000036334	Igsf10	5.146	7.87106e-73
	Igtp	-4.38111	ENSMUSG00000078853	Igtp	-2.441	1.62439e-23
Interferon-inducible GTPase 1	Iigp1	-3.32237	ENSMUSG00000054072	Iigp1	-1.072	2.05537e-10
Inhibitor of nuclear factor kappa-B kinase-interacting protein	Ikbip	1.29335	ENSMUSG00000019975	Ikbip	1.366	4.43924e-33
Interleukin-1 receptor antagonist protein	Il1rn	2.57939	ENSMUSG00000026981	Il1rn	6.065	1.57654e-80
Interleukin-6 receptor subunit beta	Il6st	1.62027	ENSMUSG00000021756	Il6st	0.333	0.000165987
Protein IMPACT	Impact	1.61	ENSMUSG00000024423	Impact	1.133	5.70402e-14
Interferon regulatory factor 2-binding protein-like	Irf2bpl	-1.22787	ENSMUSG00000034168	Irf2bpl	-0.523	0.000263246
Interferon regulatory factor 9	Irf9	-1.05943	ENSMUSG00000002325	Irf9	-1.174	1.43797e-22
Immunity-related GTPase family Q protein	Irgq	1.18561	ENSMUSG00000041037	Irgq	2.002	6.56082e-15
Ubiquitin-like protein ISG15	Isg15	-2.27479	ENSMUSG00000035692	Isg15	-3.338	2.97082e-197
Isochorismatase domain-containing protein 2A, mitochondrial	Isoc2a	1.81463	ENSMUSG00000086784	Isoc2a	1.063	4.73078e-05
Inositol-3-phosphate synthase 1	Isyna1	-4.86017	ENSMUSG00000019139	Isyna1	-3.571	2.01096e-37
Integrin alpha-3;Integrin alpha-3 heavy chain;Integrin alpha-3 light chain	Itga3	-1.36326	ENSMUSG00000001507	Itga3	-1.356	1.0673e-08
Integral membrane protein 2B;BRI2, membrane form;BRI2 intracellular domain;BRI2C, soluble form;Bri23 peptide	Itm2b	1.10828	ENSMUSG00000022108	Itm2b	0.632	1.24954e-12
Integral membrane protein 2C;CT-BRI3	Itm2c	1.54321	ENSMUSG00000026223	Itm2c	1.29	6.64498e-19
Isovaleryl-CoA dehydrogenase, mitochondrial	Ivd	-2.01258	ENSMUSG00000027332	Ivd	1.059	0.00226763
Protein IWS1 homolog	Iws1	-1.06694	ENSMUSG00000024384	Iws1	-0.729	9.46609e-10
Tyrosine-protein kinase;Tyrosine-protein kinase JAK2	Jak2	3.09661	ENSMUSG00000024789	Jak2	2.13	1.26201e-30
Transcription factor AP-1	Jun	-1.55881	ENSMUSG00000052684	Jun	-0.386	0.0005691
	Kank1	1.60139	ENSMUSG00000032702	Kank1	7.962	1.34308e-78
BTB/POZ domain-containing adapter for CUL3-mediated RhoA degradation protein 3	Kctd10	-1.55108	ENSMUSG00000001098	Kctd10	0.259	0.0317141
BTB/POZ domain-containing protein KCTD12	Kctd12	3.88073	ENSMUSG00000098557	Kctd12	3.819	0.000126829
BTB/POZ domain-containing protein KCTD15	Kctd15	2.00022	ENSMUSG00000030499	Kctd15	2.473	2.10756e-11
Lysine-specific histone demethylase 1A	Kdm1a	-1.0262	ENSMUSG00000036940	Kdm1a	-0.462	0.00121529
Kinesin-like protein;Kinesin-like protein KIF14	Kif14	2.00462	ENSMUSG00000041498	Kif14	1.44	2.92533e-19
Kinesin-like protein KIF15	Kif15	-1.18853	ENSMUSG00000036768	Kif15	-0.885	2.97165e-20
Kinesin-like protein KIF18B	Kif18b	-2.06732	ENSMUSG00000051378	Kif18b	1.565	0.0011248
Kinesin-like protein;Kinesin-like protein KIF21A	Kif21a	2.10465	ENSMUSG00000022629	Kif21a	1.357	4.60256e-16
Kinesin-like protein KIF23	Kif23	-2.80639	ENSMUSG00000032254	Kif23	1.236	1.26402e-16
Kelch domain-containing protein 4	Klhdc4	1.45197	ENSMUSG00000040263	Klhdc4	1.476	7.3002e-19
Neutrophil gelatinase-associated lipocalin	Lcn2	4.04248	ENSMUSG00000026822	Lcn2	3.595	4.5677e-264
L-lactate dehydrogenase B chain;L-lactate dehydrogenase	Ldhb	4.49522	ENSMUSG00000030246	Ldhb	4.943	3.59002e-28
Galectin;Galectin-3	Lgals3	-7.75989	ENSMUSG00000050335	Lgals3	-5.088	5.91001e-282
Legumain	Lgmn	-2.00183	ENSMUSG00000021190	Lgmn	-1.244	1.15214e-06
Prelamin-A/C;Lamin-A/C	Lmna	-1.12994	ENSMUSG00000028063	Lmna	1.519	2.84218e-96
Lamin-B1	Lmnb1	-2.70174	ENSMUSG00000024590	Lmnb1	0.476	0.000468428
LIM domain transcription factor LMO4	Lmo4	1.43905	ENSMUSG00000028266	Lmo4	0.333	9.22529e-06
	Lmo7	3.8129	ENSMUSG00000033060	Lmo7	3.868	3.87667e-51
Leiomodin-1	Lmod1	5.89981	ENSMUSG00000048096	Lmod1	9.368	2.80499e-141
Protein-lysine 6-oxidase	Lox	1.76389	ENSMUSG00000024529	Lox	2.184	1.47371e-243
Lysyl oxidase homolog 3	Loxl3	-2.0655	ENSMUSG00000000693	Loxl3	0.527	0.0129661
Acyl-CoA:lysophosphatidylglycerol acyltransferase 1	Lpgat1	1.72594	ENSMUSG00000026623	Lpgat1	1.452	8.78857e-37
Lipoma-preferred partner homolog	Lpp	1.28701	ENSMUSG00000033306	Lpp	1.051	6.9012e-53
Prolow-density lipoprotein receptor-related protein 1;Low-density lipoprotein receptor-related protein 1 85 kDa subunit;Low-density lipoprotein receptor-related protein 1 515 kDa subunit;Low-density lipoprotein receptor-related protein 1 intracellular domain	Lrp1	1.13953	ENSMUSG00000040249	Lrp1	1.486	2.62737e-54
	Lrrc32	2.2415	ENSMUSG00000090958	Lrrc32	2.976	2.29078e-52
Leucine-rich repeat serine/threonine-protein kinase 2	Lrrk2	-1.12209	ENSMUSG00000036273	Lrrk2	0.655	0.0266182
Latent-transforming growth factor beta-binding protein 2	Ltbp2	3.74299	ENSMUSG00000002020	Ltbp2	4.923	2.59598e-147
Latexin	Lxn	1.83646	ENSMUSG00000047557	Lxn	3	1.14084e-48
Lymphocyte antigen 6A-2/6E-1	Ly6a	3.63022	ENSMUSG00000075602	Ly6a	2.74	1.41016e-264
Lymphocyte antigen 75	Ly75	-2.86124	ENSMUSG00000026980	Ly75	-2.046	2.05345e-48
LYR motif-containing protein 4	Lyrm4	-1.69956	ENSMUSG00000046573	Lyrm4	-0.802	9.88314e-06
O-acetyl-ADP-ribose deacetylase MACROD1	Macrod1	2.8554	ENSMUSG00000036278	Macrod1	1.935	9.85484e-07
	Maged2	1.91889	ENSMUSG00000025268	Maged2	3.365	6.83091e-89
Amine oxidase [flavin-containing] A	Maoa	1.15024	ENSMUSG00000025037	Maoa	1.037	5.30354e-12
Microtubule-associated protein 1A;MAP1A heavy chain;MAP1 light chain LC2	Map1a	1.9987	ENSMUSG00000027254	Map1a	2.544	9.32579e-60
MAP kinase-activated protein kinase 2	Mapkapk2	1.41115	ENSMUSG00000016528	Mapkapk2	0.312	0.0262184
Cell surface glycoprotein MUC18	Mcam	-2.10443	ENSMUSG00000032135	Mcam	-2.099	2.04226e-06
Malignant T-cell-amplified sequence 2	Mcts2	-1.13263	ENSMUSG00000042814	Mcts2	-1.152	6.57289e-06
	Mdn1	-1.33032	ENSMUSG00000058006	Mdn1	-1.55	1.77982e-44
Male-enhanced antigen 1	Mea1	-1.36834	ENSMUSG00000002768	Mea1	-0.947	2.81264e-12
Mediator of RNA polymerase II transcription subunit 12	Med12	-1.83005	ENSMUSG00000079487	Med12	-0.519	0.0152859
Mediator of RNA polymerase II transcription subunit 19	Med19	-1.21346	ENSMUSG00000027080	Med19	-0.337	0.00245095
Mediator of RNA polymerase II transcription subunit 31	Med31	-1.9234	ENSMUSG00000020801	Med31	-1.301	3.47092e-07
Homeobox protein Meis2	Meis2	1.69694	ENSMUSG00000027210	Meis2	2.194	7.58129e-65
7SK snRNA methylphosphate capping enzyme	Mepce	-1.68467	ENSMUSG00000029726	Mepce	-0.681	0.00142989
	Mettl7a1	3.97038	ENSMUSG00000054619	Mettl7a1	3.65	1.69546e-08
Matrix Gla protein	Mgp	3.8682	ENSMUSG00000030218	Mgp	9.172	0
Microsomal glutathione S-transferase 1	Mgst1	3.49167	ENSMUSG00000008540	Mgst1	3.227	2.06807e-22
Protein-methionine sulfoxide oxidase MICAL2	Mical2	1.07087	ENSMUSG00000038244	Mical2	1.994	5.84847e-31
Mixed lineage kinase domain-like protein	Mlkl	-2.0772	ENSMUSG00000012519	Mlkl	-1.979	4.07122e-13
Neprilysin	Mme	9.55247	ENSMUSG00000027820	Mme	5.065	3.21408e-152
Matrix metalloproteinase-14	Mmp14	1.54109	ENSMUSG00000000957	Mmp14	1.052	2.5369e-38
72 kDa type IV collagenase;PEX	Mmp2	3.90798	ENSMUSG00000031740	Mmp2	3.268	9.59443e-135
CDK-activating kinase assembly factor MAT1	Mnat1	-1.15255	ENSMUSG00000021103	Mnat1	-0.697	6.93567e-10
	Mndal	-3.73025	ENSMUSG00000090272	Mndal	1.621	1.16973e-20
	Morc3	-1.02122	ENSMUSG00000039456	Morc3	-1.088	3.20995e-09
Mortality factor 4-like protein 1	Morf4l1	-1.55656	ENSMUSG00000062270	Morf4l1	0.485	7.88222e-05
U3 small nucleolar ribonucleoprotein protein MPP10	Mphosph10	-1.16206	ENSMUSG00000030521	Mphosph10	-0.821	7.82428e-16
MAGUK p55 subfamily member 2	Mpp2	2.30256	ENSMUSG00000017314	Mpp2	2.357	5.14376e-10
MAGUK p55 subfamily member 7	Mpp7	-1.25263	ENSMUSG00000057440	Mpp7	-6.887	4.77166e-33
DNA mismatch repair protein Msh3	Msh3	-2.21745	ENSMUSG00000014850	Msh3	-0.722	0.000752327
Musculoskeletal embryonic nuclear protein 1	Mustn1	3.48542	ENSMUSG00000042485	Mustn1	6.315	2.02646e-127
	Mvp	1.10077	ENSMUSG00000030681	Mvp	0.758	0.000263681
Matrix-remodeling-associated protein 8	Mxra8	2.41972	ENSMUSG00000029070	Mxra8	2.02	1.7767e-54
Myeloid-associated differentiation marker	Myadm	1.33465	ENSMUSG00000068566	Myadm	0.946	2.0905e-36
Myosin regulatory light polypeptide 9	Myl9	3.36891	ENSMUSG00000067818	Myl9	3.861	1.39286e-244
H/ACA ribonucleoprotein complex non-core subunit NAF1	Naf1	-1.51938	ENSMUSG00000014907	Naf1	-1.023	5.47668e-14
Nicotinamide phosphoribosyltransferase	Nampt	-1.16106	ENSMUSG00000020572	Nampt	-1.162	7.74984e-28
Condensin-2 complex subunit D3	Ncapd3	-1.69545	ENSMUSG00000035024	Ncapd3	-1.028	4.78431e-07
Condensin-2 complex subunit G2	Ncapg2	-1.30931	ENSMUSG00000042029	Ncapg2	-1.454	2.35432e-18
Protein NDRG1	Ndrg1	-1.08589	ENSMUSG00000005125	Ndrg1	-1.863	5.47015e-46
NADH dehydrogenase [ubiquinone] 1 alpha subcomplex subunit 7	Ndufa7	1.02233	ENSMUSG00000041881	Ndufa7	-0.207	0.0187195
NADH dehydrogenase [ubiquinone] 1 beta subcomplex subunit 2, mitochondrial	Ndufb2	2.37093	ENSMUSG00000002416	Ndufb2	0.291	0.00423244
Nestin	Nes	-1.53126	ENSMUSG00000004891	Nes	-1.629	4.25214e-41
Nexilin	Nexn	1.9932	ENSMUSG00000039103	Nexn	2.495	1.43582e-118
Neurofibromin	Nf1	-1.02246	ENSMUSG00000020716	Nf1	-0.612	5.6205e-05
Nuclear factor of activated T-cells, cytoplasmic 4	Nfatc4	2.16141	ENSMUSG00000023411	Nfatc4	1.986	7.86686e-52
Nidogen-1	Nid1	1.98753	ENSMUSG00000005397	Nid1	2.808	4.6917e-69
Glycylpeptide N-tetradecanoyltransferase;Glycylpeptide N-tetradecanoyltransferase 2	Nmt2	-1.00265	ENSMUSG00000026643	Nmt2	-0.839	5.52511e-10
Nicotinamide N-methyltransferase	Nnmt	1.98417	ENSMUSG00000032271	Nnmt	0.851	0.000176246
Nucleolar complex protein 4 homolog	Noc4l	-1.84757	ENSMUSG00000033294	Noc4l	-1.742	9.40348e-28
Nucleolar protein 3	Nol3	1.76869	ENSMUSG00000014776	Nol3	1.542	4.68829e-08
Non-POU domain-containing octamer-binding protein	Nono	-4.9411	ENSMUSG00000031311	Nono	-10.046	8.86749e-121
Nucleolar protein 14	Nop14	-1.10141	ENSMUSG00000036693	Nop14	-2.298	2.34837e-171
Probable aminopeptidase NPEPL1	Npepl1	3.0507	ENSMUSG00000039263	Npepl1	0.716	0.00729298
NAD(P)H dehydrogenase [quinone] 1	Nqo1	5.33163	ENSMUSG00000003849	Nqo1	4.715	1.88617e-61
Ribosyldihydronicotinamide dehydrogenase [quinone]	Nqo2	2.58861	ENSMUSG00000046949	Nqo2	1.932	9.25456e-20
Neuropilin-1	Nrp1	1.32233	ENSMUSG00000025810	Nrp1	3.105	1.99212e-73
Neuropilin-2	Nrp2	-1.95213	ENSMUSG00000025969	Nrp2	-3.221	2.15579e-42
	Nsmce4a	-1.17285	ENSMUSG00000040331	Nsmce4a	-0.546	3.03883e-05
Probable 28S rRNA (cytosine-C(5))-methyltransferase	Nsun5	-3.52516	ENSMUSG00000000916	Nsun5	-1.332	0.00802444
5(3)-deoxyribonucleotidase, cytosolic type	Nt5c	1.28931	ENSMUSG00000020736	Nt5c	1.114	1.41911e-09
Uridine diphosphate glucose pyrophosphatase	Nudt14	-1.40134	ENSMUSG00000002804	Nudt14	-1.155	0.000620211
2-5-oligoadenylate synthase-like protein 2	Oasl2	-2.86588	ENSMUSG00000029561	Oasl2	-2.56	5.40278e-25
Ornithine aminotransferase, mitochondrial	Oat	1.26468	ENSMUSG00000030934	Oat	1.342	1.4297e-27
Origin recognition complex subunit 2	Orc2	-1.4155	ENSMUSG00000026037	Orc2	-1.305	5.40278e-25
Origin recognition complex subunit 6	Orc6	-1.28148	ENSMUSG00000031697	Orc6	-0.486	0.000575802
Oxysterol-binding protein-related protein 2	Osbpl2	1.03891	ENSMUSG00000039050	Osbpl2	-0.979	2.87874e-05
Oncostatin-M-specific receptor subunit beta	Osmr	1.16411	ENSMUSG00000022146	Osmr	0.398	0.0104733
Succinyl-CoA:3-ketoacid coenzyme A transferase 1, mitochondrial;Succinyl-CoA:3-ketoacid-coenzyme A transferase	Oxct1	1.10711	ENSMUSG00000022186	Oxct1	1.136	3.76457e-55
P2X purinoceptor;P2X purinoceptor 4	P2rx4	2.90861	ENSMUSG00000029470	P2rx4	1.214	3.44887e-08
Prolyl 4-hydroxylase subunit alpha-3	P4ha3	1.87254	ENSMUSG00000051048	P4ha3	3.15	5.37107e-30
Palladin	Palld	1.40058	ENSMUSG00000058056	Palld	1.748	1.39302e-173
Bifunctional 3-phosphoadenosine 5-phosphosulfate synthase 2;Sulfate adenylyltransferase;Adenylyl-sulfate kinase	Papss2	2.93545	ENSMUSG00000024899	Papss2	1.353	0.000946098
	Parp10	-4.06583	ENSMUSG00000063268	Parp10	-1.702	1.74939e-09
Poly [ADP-ribose] polymerase 14	Parp14	-1.05059	ENSMUSG00000034422	Parp14	-1.536	3.73082e-19
Poly [ADP-ribose] polymerase 9	Parp9	-2.41779	ENSMUSG00000022906	Parp9	-1.395	2.45782e-12
PRKC apoptosis WT1 regulator protein	Pawr	5.6888	ENSMUSG00000035873	Pawr	2.227	5.88352e-28
Pre-B-cell leukemia transcription factor 1	Pbx1	2.00208	ENSMUSG00000052534	Pbx1	2.643	6.97749e-140
Pre-B-cell leukemia transcription factor-interacting protein 1	Pbxip1	2.77671	ENSMUSG00000042613	Pbxip1	0.898	3.42387e-18
Pterin-4-alpha-carbinolamine dehydratase 2	Pcbd2	3.05419	ENSMUSG00000021496	Pcbd2	0.581	0.00909085
Phosphoenolpyruvate carboxykinase [GTP], mitochondrial	Pck2	1.65746	ENSMUSG00000040618	Pck2	-0.218	0.0203393
Protein RRP5 homolog	Pdcd11	-1.05489	ENSMUSG00000025047	Pdcd11	-1.05	5.36365e-16
Platelet-derived growth factor receptor alpha	Pdgfra	1.29361	ENSMUSG00000029231	Pdgfra	2.499	2.44642e-25
Platelet-derived growth factor receptor beta	Pdgfrb	1.78346	ENSMUSG00000024620	Pdgfrb	1.297	9.78675e-06
	Pdia6	6.1739	ENSMUSG00000020571	Pdia6	0.842	2.05741e-28
PDZ and LIM domain protein 1	Pdlim1	-1.46412	ENSMUSG00000055044	Pdlim1	-1.501	4.27853e-33
PDZ and LIM domain protein 2	Pdlim2	1.02274	ENSMUSG00000022090	Pdlim2	1.893	4.22324e-71
PDZ and LIM domain protein 5	Pdlim5	1.54523	ENSMUSG00000028273	Pdlim5	1.639	7.42807e-27
Sister chromatid cohesion protein PDS5 homolog B	Pds5b	-1.03199	ENSMUSG00000034021	Pds5b	-0.924	2.83243e-22
Profilin-2	Pfn2	1.48267	ENSMUSG00000027805	Pfn2	2.065	2.294e-09
Serine/threonine-protein phosphatase PGAM5, mitochondrial	Pgam5	-1.39842	ENSMUSG00000029500	Pgam5	-1.834	4.30599e-18
6-phosphogluconate dehydrogenase, decarboxylating	Pgd	1.00273	ENSMUSG00000028961	Pgd	1.974	7.54192e-73
6-phosphogluconolactonase	Pgls	1.05531	ENSMUSG00000031807	Pgls	0.454	3.36475e-06
Pyroglutamyl-peptidase 1	Pgpep1	2.08083	ENSMUSG00000056204	Pgpep1	1.755	7.99351e-17
Pleckstrin homology-like domain family A member 3	Phlda3	1.81905	ENSMUSG00000041801	Phlda3	2.087	2.66604e-36
PTB-containing, cubilin and LRP1-interacting protein	Pid1	2.72412	ENSMUSG00000045658	Pid1	3.792	3.67991e-22
Piezo-type mechanosensitive ion channel component;Piezo-type mechanosensitive ion channel component 1	Piezo1	1.48702	ENSMUSG00000014444	Piezo1	-0.529	3.99903e-05
	Pkp2	5.05217	ENSMUSG00000041957	Pkp2	0.664	0.0388028
Cytosolic phospholipase A2;Phospholipase A2;Lysophospholipase	Pla2g4a	1.25464	ENSMUSG00000056220	Pla2g4a	1.142	3.54662e-16
Urokinase plasminogen activator surface receptor	Plaur	1.18146	ENSMUSG00000046223	Plaur	0.67	0.0153893
1-phosphatidylinositol 4,5-bisphosphate phosphodiesterase beta-1	Plcb1	1.68087	ENSMUSG00000051177	Plcb1	7.117	7.65837e-68
Phosphoinositide phospholipase C;1-phosphatidylinositol 4,5-bisphosphate phosphodiesterase delta-1	Plcd1	2.51017	ENSMUSG00000010660	Plcd1	2.617	2.84881e-14
Pleckstrin homology domain-containing family O member 2	Plekho2	1.46274	ENSMUSG00000050721	Plekho2	0.825	8.69381e-05
DNA-directed RNA polymerase I subunit RPA2	Polr1b	-3.19367	ENSMUSG00000027395	Polr1b	-1.304	1.18504e-05
DNA-directed RNA polymerase III subunit RPC8	Polr3h	-1.14586	ENSMUSG00000022476	Polr3h	-1.472	1.81536e-20
Serum paraoxonase/lactonase 3	Pon3	1.26364	ENSMUSG00000029759	Pon3	0.658	0.00805688
Suppressor of SWI4 1 homolog	Ppan	-1.29542	ENSMUSG00000004100	Ppan	-0.971	5.99546e-08
Peptidyl-prolyl cis-trans isomerase C	Ppic	1.18707	ENSMUSG00000024538	Ppic	0.31	0.00101689
Peptidyl-prolyl cis-trans isomerase F, mitochondrial	Ppif	-1.2847	ENSMUSG00000021868	Ppif	-1.388	1.81194e-05
Peptidyl-prolyl cis-trans isomerase-like 4	Ppil4	-2.36927	ENSMUSG00000015757	Ppil4	-1.246	1.34523e-22
Protein phosphatase 1 regulatory subunit;Protein phosphatase 1 regulatory subunit 12B	Ppp1r12b	4.10664	ENSMUSG00000073557	Ppp1r12b	3.53	2.98848e-23
Protein phosphatase 1 regulatory subunit 12C	Ppp1r12c	1.73302	ENSMUSG00000019254	Ppp1r12c	-0.666	0.000862763
DNA primase small subunit;DNA primase	Prim1	-1.17255	ENSMUSG00000025395	Prim1	-1.24	2.972e-23
DNA primase large subunit	Prim2	-1.02769	ENSMUSG00000026134	Prim2	-1.269	1.67962e-09
Protein kinase C iota type	Prkci	-1.04539	ENSMUSG00000037643	Prkci	-1.067	9.90459e-07
Protein arginine N-methyltransferase 3	Prmt3	1.0313	ENSMUSG00000030505	Prmt3	-0.958	2.17998e-12
Pre-mRNA-splicing factor 38B	Prpf38b	-1.10963	ENSMUSG00000027881	Prpf38b	-0.838	3.00173e-17
Ribose-phosphate pyrophosphokinase 2	Prps2	-1.5769	ENSMUSG00000025742	Prps2	-1.152	5.49399e-07
Protein PRRC1	Prrc1	1.32783	ENSMUSG00000024594	Prrc1	1.003	3.82043e-05
Paired mesoderm homeobox protein 1	Prrx1	2.00204	ENSMUSG00000026586	Prrx1	2.433	3.50198e-158
Paired mesoderm homeobox protein 2	Prrx2	3.07331	ENSMUSG00000039476	Prrx2	3.449	1.53328e-107
Protein prune homolog 2	Prune2	2.80747	ENSMUSG00000039126	Prune2	0.777	8.40885e-05
Proteasome subunit beta type-8;Proteasome subunit beta type	Psmb8	-1.40948	ENSMUSG00000024338	Psmb8	-1.062	4.15331e-10
Prostacyclin synthase	Ptgis	6.93536	ENSMUSG00000017969	Ptgis	9.287	2.63405e-73
Prostaglandin reductase 1	Ptgr1	1.01624	ENSMUSG00000028378	Ptgr1	1.268	1.10457e-08
Prostaglandin G/H synthase 1	Ptgs1	3.96362	ENSMUSG00000047250	Ptgs1	3.145	1.05537e-50
Protein-tyrosine-phosphatase;Tyrosine-protein phosphatase non-receptor type 21	Ptpn21	-1.68414	ENSMUSG00000021009	Ptpn21	-1.607	7.23343e-13
Protein-tyrosine-phosphatase;Receptor-type tyrosine-protein phosphatase kappa	Ptprk	1.76269	ENSMUSG00000019889	Ptprk	1.475	4.49919e-15
tRNA pseudouridine synthase A, mitochondrial;tRNA pseudouridine synthase	Pus1	-1.48581	ENSMUSG00000029507	Pus1	-1.213	5.5159e-05
	Pus7	-1.30874	ENSMUSG00000057541	Pus7	-1.835	6.14479e-34
Periodic tryptophan protein 2 homolog	Pwp2	-1.40533	ENSMUSG00000032834	Pwp2	-1.974	6.18423e-21
Pyrroline-5-carboxylate reductase 1, mitochondrial	Pycr1	1.8238	ENSMUSG00000025140	Pycr1	-1.158	3.90216e-10
Ras-related protein Rab-32	Rab32	3.06667	ENSMUSG00000019832	Rab32	6.801	7.41446e-31
	Rab4b	1.52259	ENSMUSG00000053291	Rab4b	1.094	0.00545351
Cell cycle checkpoint control protein RAD9A	Rad9a	-1.34675	ENSMUSG00000024824	Rad9a	-3.115	2.69845e-49
Ras association domain-containing protein 1	Rassf1	-1.2159	ENSMUSG00000010067	Rassf1	-1.625	1.20037e-46
Putative RNA-binding protein 15B	Rbm15b	4.43778	ENSMUSG00000074102	Rbm15b	-0.478	0.0387211
Probable RNA-binding protein 19	Rbm19	-1.64697	ENSMUSG00000029594	Rbm19	-1.673	1.94227e-16
RNA-binding protein 25	Rbm25	-1.04983	ENSMUSG00000010608	Rbm25	-0.569	1.61661e-18
Retinol-binding protein 1	Rbp1	5.18103	ENSMUSG00000046402	Rbp1	4.569	2.75649e-98
RNA-binding protein with multiple splicing	Rbpms	3.50304	ENSMUSG00000031586	Rbpms	2.973	5.76565e-41
Reticulocalbin-1	Rcn1	1.4018	ENSMUSG00000005973	Rcn1	1.548	6.98805e-46
Reticulocalbin-3	Rcn3	1.7475	ENSMUSG00000019539	Rcn3	1.954	5.79052e-111
ATP-dependent DNA helicase Q1	Recql	-1.25124	ENSMUSG00000030243	Recql	0.781	0.00242723
Receptor expression-enhancing protein 4	Reep4	-1.33776	ENSMUSG00000033589	Reep4	0.753	0.000160565
N-acylglucosamine 2-epimerase	Renbp	-3.70877	ENSMUSG00000031387	Renbp	-3.34	1.10908e-80
Oligoribonuclease, mitochondrial	Rexo2	1.08843	ENSMUSG00000032026	Rexo2	0.918	6.34244e-37
RNA exonuclease 4	Rexo4	-1.30993	ENSMUSG00000052406	Rexo4	-0.841	1.38267e-12
Replication factor C subunit 2	Rfc2	-1.03125	ENSMUSG00000023104	Rfc2	-0.627	0.000386476
Receptor-interacting serine/threonine-protein kinase 2	Ripk2	1.3867	ENSMUSG00000041135	Ripk2	1.19	1.07347e-05
Receptor-interacting serine/threonine-protein kinase 3	Ripk3	1.40303	ENSMUSG00000022221	Ripk3	1.549	7.30486e-24
E3 ubiquitin-protein ligase RNF213	Rnf213	-1.39195	ENSMUSG00000070327	Rnf213	-1.563	1.77541e-25
Aminopeptidase B	Rnpep	3.31815	ENSMUSG00000041926	Rnpep	2.014	2.09325e-14
Active regulator of SIRT1	Rps19bp1	-1.09992	ENSMUSG00000051518	Rps19bp1	-0.985	2.11902e-24
Ras-related protein R-Ras	Rras	1.18994	ENSMUSG00000038387	Rras	0.895	1.62956e-11
Ribonucleoside-diphosphate reductase subunit M2	Rrm2	-1.23509	ENSMUSG00000020649	Rrm2	-0.327	0.0463118
RRP12-like protein	Rrp12	-1.11038	ENSMUSG00000035049	Rrp12	-1.753	2.54668e-13
U3 small nucleolar RNA-interacting protein 2	Rrp9	-1.33684	ENSMUSG00000041506	Rrp9	-2.021	3.47039e-33
Probable ribosome biogenesis protein RLP24	Rsl24d1	-1.54666	ENSMUSG00000032215	Rsl24d1	-1.216	1.28304e-14
Receptor-transporting protein 4	Rtp4	-1.96658	ENSMUSG00000033355	Rtp4	-1.839	4.22197e-29
Protein S100-A10	S100a10	1.24937	ENSMUSG00000041959	S100a10	1.207	9.2949e-45
Serum amyloid A-3 protein	Saa3	5.67843	ENSMUSG00000040026	Saa3	3.577	0
Ribosome maturation protein SBDS	Sbds	-1.00922	ENSMUSG00000025337	Sbds	-1.624	4.2767e-26
Protein strawberry notch homolog 1	Sbno1	-2.06317	ENSMUSG00000038095	Sbno1	-1.087	7.41195e-48
Scavenger receptor class B member 1	Scarb1	-2.6078	ENSMUSG00000037936	Scarb1	-1.156	9.09865e-07
Secernin-1	Scrn1	2.78109	ENSMUSG00000019124	Scrn1	2.434	3.08517e-17
Protein SDA1 homolog	Sdad1	-2.42196	ENSMUSG00000029415	Sdad1	-1.846	5.80841e-54
Septin-8	Sept8	1.23748	ENSMUSG00000018398	Sept8	-0.266	0.00505732
Serine protease inhibitor A3G	Serpina3g	-6.33995	ENSMUSG00000041481	Serpina3g	3.359	3.84856e-55
	Serpina3i	-5.89159	ENSMUSG00000079014	Serpina3i	4.758	7.41576e-07
Leukocyte elastase inhibitor A	Serpinb1a	6.60587	ENSMUSG00000044734	Serpinb1a	7.725	5.22317e-62
	Serpinb9	2.23774	ENSMUSG00000045827	Serpinb9	2.641	1.81024e-26
Glia-derived nexin	Serpine2	6.21114	ENSMUSG00000026249	Serpine2	10.575	0
Serpin H1	Serpinh1	1.05735	ENSMUSG00000070436	Serpinh1	0.192	0.047376
SEC14 domain and spectrin repeat-containing protein 1	Sestd1	2.6335	ENSMUSG00000042272	Sestd1	1.065	4.47424e-13
Delta-sarcoglycan	Sgcd	3.33206	ENSMUSG00000020354	Sgcd	3.762	3.14294e-11
Epsilon-sarcoglycan	Sgce	1.49689	ENSMUSG00000004631	Sgce	-0.835	0.0221001
SH3 domain-containing protein 19	Sh3d19	1.37137	ENSMUSG00000028082	Sh3d19	1.604	4.9435e-21
Nucleotide exchange factor SIL1	Sil1	1.09191	ENSMUSG00000024357	Sil1	0.598	0.0145995
Natural resistance-associated macrophage protein 2	Slc11a2	2.37764	ENSMUSG00000023030	Slc11a2	1.431	4.41527e-20
Solute carrier family 12 member 2	Slc12a2	1.76649	ENSMUSG00000024597	Slc12a2	1.247	1.02627e-24
Amino acid transporter;Neutral amino acid transporter A	Slc1a4	1.16543	ENSMUSG00000020142	Slc1a4	-0.95	3.17618e-09
High affinity cationic amino acid transporter 1	Slc7a1	-1.72169	ENSMUSG00000041313	Slc7a1	-2.964	6.73863e-171
Na(+)/H(+) exchange regulatory cofactor NHE-RF1	Slc9a3r1	1.89774	ENSMUSG00000020733	Slc9a3r1	2.114	8.53995e-13
Pre-mRNA-splicing factor SLU7	Slu7	-1.80643	ENSMUSG00000020409	Slu7	-0.799	1.57527e-15
Structural maintenance of chromosomes protein 6	Smc6	-1.73691	ENSMUSG00000020608	Smc6	-0.748	1.58362e-38
Sorting nexin;Sorting nexin-18	Snx18	1.5716	ENSMUSG00000042364	Snx18	1.205	6.28586e-31
Sorting nexin-8	Snx8	-3.33228	ENSMUSG00000029560	Snx8	-2.27	9.20382e-81
Superoxide dismutase [Mn], mitochondrial	Sod2	1.36287	ENSMUSG00000006818	Sod2	1.411	2.18288e-29
Sorbin and SH3 domain-containing protein 1	Sorbs1	3.50173	ENSMUSG00000025006	Sorbs1	3.737	2.11171e-50
Vinexin	Sorbs3	2.28473	ENSMUSG00000022091	Sorbs3	1.729	0.00966735
	Sptan1	-1.40147	ENSMUSG00000057738	Sptan1	-0.339	0.00126345
Serine palmitoyltransferase 1	Sptlc1	-1.32551	ENSMUSG00000021468	Sptlc1	0.67	0.000155952
Serum response factor-binding protein 1	Srfbp1	-2.21445	ENSMUSG00000024528	Srfbp1	-1.576	6.04333e-05
Sjoegren syndrome nuclear autoantigen 1 homolog	Ssna1	1.05873	ENSMUSG00000026966	Ssna1	0.666	5.51633e-05
Suppression of tumorigenicity 5 protein	St5	1.46763	ENSMUSG00000031024	St5	1.97	4.40936e-35
Signal transducer and activator of transcription;Signal transducer and activator of transcription 1	Stat1	-1.18284	ENSMUSG00000026104	Stat1	-0.687	0.000169425
Metalloreductase STEAP4	Steap4	4.82293	ENSMUSG00000012428	Steap4	5.295	8.1789e-13
Polycomb protein Suz12	Suz12	-1.0541	ENSMUSG00000017548	Suz12	-1.085	5.63777e-37
Synaptopodin	Synpo	4.44379	ENSMUSG00000043079	Synpo	3.97	7.04504e-65
	Taf15	1.61338	ENSMUSG00000020680	Taf15	-1.234	2.56835e-20
Transgelin	Tagln	1.24891	ENSMUSG00000032085	Tagln	1.763	5.18621e-95
Antigen peptide transporter 1	Tap1	-2.19754	ENSMUSG00000037321	Tap1	-0.827	6.83055e-07
Antigen peptide transporter 2	Tap2	-2.21277	ENSMUSG00000024339	Tap2	-1.288	0.000795907
Tapasin	Tapbp	-2.11642	ENSMUSG00000024308	Tapbp	-1.355	1.03626e-30
TBC1 domain family member 2B	Tbc1d2b	1.7502	ENSMUSG00000037410	Tbc1d2b	1.508	2.96776e-09
TRPM8 channel-associated factor 2	Tcaf2	1.0385	ENSMUSG00000029851	Tcaf2	1.46	5.27387e-05
Testin	Tes	1.04947	ENSMUSG00000029552	Tes	2.83	1.86698e-128
Testis-expressed sequence 30 protein	Tex30	-1.42979	ENSMUSG00000026049	Tex30	-1.68	6.85247e-10
Transferrin receptor protein 1	Tfrc	-1.60395	ENSMUSG00000022797	Tfrc	-0.391	0.00159344
Transforming growth factor beta-1-induced transcript 1 protein	Tgfb1i1	1.41082	ENSMUSG00000030782	Tgfb1i1	2.714	1.19065e-51
Transforming growth factor beta receptor type 3	Tgfbr3	2.89997	ENSMUSG00000029287	Tgfbr3	0.748	6.69712e-05
Protein-glutamine gamma-glutamyltransferase 2	Tgm2	5.23174	ENSMUSG00000037820	Tgm2	1.942	5.09166e-32
Thrombospondin-1	Thbs1	1.8567	ENSMUSG00000040152	Thbs1	2.608	5.17174e-118
Thy-1 membrane glycoprotein	Thy1	5.48668	ENSMUSG00000032011	Thy1	5.275	1.46551e-144
Protein timeless homolog	Timeless	-2.48114	ENSMUSG00000039994	Timeless	-1.368	2.07645e-26
Metalloproteinase inhibitor 2	Timp2	1.34274	ENSMUSG00000017466	Timp2	0.77	4.5803e-45
Talin-2	Tln2	3.1864	ENSMUSG00000052698	Tln2	2.108	6.72309e-26
Transmembrane emp24 domain-containing protein 3	Tmed3	1.13988	ENSMUSG00000032353	Tmed3	0.894	1.04821e-11
Transmembrane protein 176B	Tmem176b	3.15491	ENSMUSG00000029810	Tmem176b	2.485	6.953e-270
Transmembrane protein 209	Tmem209	-1.27614	ENSMUSG00000029782	Tmem209	-1.317	7.61482e-10
Type 2 phosphatidylinositol 4,5-bisphosphate 4-phosphatase	Tmem55a	1.55918	ENSMUSG00000028221	Tmem55a	2.17	1.36271e-24
Transmembrane protein 59	Tmem59	3.56784	ENSMUSG00000028618	Tmem59	1.03	2.90711e-23
Thymosin beta-4;Hematopoietic system regulatory peptide	Tmsb4x	1.59012	ENSMUSG00000049775	Tmsb4x	3.632	5.35334e-251
Torsin-3A	Tor3a	-4.18235	ENSMUSG00000060519	Tor3a	-2.482	4.54978e-38
	Tpm1	1.30508	ENSMUSG00000032366	Tpm1	1.668	2.21859e-276
Tropomyosin beta chain	Tpm2	1.73213	ENSMUSG00000028464	Tpm2	2.014	5.44345e-164
Protein-tyrosine sulfotransferase 2	Tpst2	-1.3429	ENSMUSG00000029344	Tpst2	-1.09	6.93567e-10
TRIO and F-actin-binding protein	Triobp	1.06311	ENSMUSG00000033088	Triobp	0.92	3.32134e-05
tRNA (adenine(58)-N(1))-methyltransferase catalytic subunit TRMT61A	Trmt61a	-1.32931	ENSMUSG00000060950	Trmt61a	-1.301	1.07425e-08
Transformation/transcription domain-associated protein	Trrap	-2.66134	ENSMUSG00000045482	Trrap	-0.653	0.000238849
Tetratricopeptide repeat protein 39B	Ttc39b	-1.12738	ENSMUSG00000038172	Ttc39b	-1.34	3.59727e-19
Dual specificity protein kinase TTK	Ttk	-3.77289	ENSMUSG00000038379	Ttk	-0.374	0.00138531
Tubulin beta-2A chain	Tubb2a	1.15897	ENSMUSG00000058672	Tubb2a	3.221	6.18114e-107
Tubulin beta-3 chain	Tubb3	2.06206	ENSMUSG00000062380	Tubb3	1.949	2.33714e-22
Thioredoxin-like protein 4A	Txnl4a	-1.02486	ENSMUSG00000057130	Txnl4a	-1.127	2.12468e-21
Ubiquitin carboxyl-terminal hydrolase isozyme L1	Uchl1	-3.87598	ENSMUSG00000029223	Uchl1	-3.098	2.77369e-39
Unconventional prefoldin RPB5 interactor	Uri1	1.74968	ENSMUSG00000030421	Uri1	0.465	5.12231e-06
Ubl carboxyl-terminal hydrolase 18	Usp18	-2.42719	ENSMUSG00000030107	Usp18	-2.468	7.11171e-57
Small subunit processome component 20 homolog	Utp20	-1.33786	ENSMUSG00000004356	Utp20	-0.981	3.49693e-08
U3 small nucleolar RNA-associated protein 6 homolog	Utp6	-1.18837	ENSMUSG00000035575	Utp6	-0.596	0.000317461
Vasodilator-stimulated phosphoprotein	Vasp	1.29461	ENSMUSG00000030403	Vasp	1.176	5.50793e-21
	Vcam1	1.08872	ENSMUSG00000027962	Vcam1	1.769	1.81211e-133
Versican core protein	Vcan	2.85233	ENSMUSG00000021614	Vcan	2.163	2.35287e-213
Vacuolar protein sorting-associated protein 13A	Vps13a	-2.62276	ENSMUSG00000046230	Vps13a	-1.763	1.12394e-25
Vacuolar protein sorting-associated protein 37C	Vps37c	1.41646	ENSMUSG00000048832	Vps37c	1.283	0.0246852
Vacuolar protein sorting-associated protein 4A	Vps4a	1.20655	ENSMUSG00000031913	Vps4a	1.089	1.27287e-06
Wiskott-Aldrich syndrome protein family member 2	Wasf2	1.13604	ENSMUSG00000028868	Wasf2	0.386	7.57938e-05
WD repeat-containing protein 46	Wdr46	-1.89468	ENSMUSG00000024312	Wdr46	-0.961	4.37611e-07
XIAP-associated factor 1	Xaf1	-2.54859	ENSMUSG00000040483	Xaf1	-2.432	2.08117e-22
Xanthine dehydrogenase/oxidase;Xanthine dehydrogenase;Xanthine oxidase	Xdh	1.72622	ENSMUSG00000024066	Xdh	1.903	4.96732e-33
14-3-3 protein beta/alpha;14-3-3 protein beta/alpha, N-terminally processed	Ywhab	1.90856	ENSMUSG00000018326	Ywhab	-0.446	5.70713e-17
Zinc finger C2HC domain-containing protein 1A	Zc2hc1a	1.68171	ENSMUSG00000043542	Zc2hc1a	2.718	7.81822e-58
Zinc finger CCHC domain-containing protein 8	Zcchc8	-1.25508	ENSMUSG00000029427	Zcchc8	-0.648	0.0034906

## Sheet: opposite_43
Protein names	Gene names	Student's T-test Difference KO_WT	EnsemblGeneID	Symbol	logFC_EXP1vsCTR1	FDR_EXP1vsCTR1
	Taf15	1.61338	ENSMUSG00000020680	Taf15	-1.234	2.56835e-20
Pyrroline-5-carboxylate reductase 1, mitochondrial	Pycr1	1.8238	ENSMUSG00000025140	Pycr1	-1.158	3.90216e-10
Branched-chain-amino-acid aminotransferase, cytosolic;Branched-chain-amino-acid aminotransferase	Bcat1	4.09579	ENSMUSG00000030268	Bcat1	-0.987	8.22901e-22
Cystathionine gamma-lyase	Cth	7.10691	ENSMUSG00000028179	Cth	-0.986	0.00178054
Oxysterol-binding protein-related protein 2	Osbpl2	1.03891	ENSMUSG00000039050	Osbpl2	-0.979	2.87874e-05
Protein arginine N-methyltransferase 3	Prmt3	1.0313	ENSMUSG00000030505	Prmt3	-0.958	2.17998e-12
Amino acid transporter;Neutral amino acid transporter A	Slc1a4	1.16543	ENSMUSG00000020142	Slc1a4	-0.95	3.17618e-09
Cyclin-dependent kinase inhibitor 1B	Cdkn1b	2.49621	ENSMUSG00000003031	Cdkn1b	-0.856	1.70116e-12
Epsilon-sarcoglycan	Sgce	1.49689	ENSMUSG00000004631	Sgce	-0.835	0.0221001
ATR-interacting protein	Atrip	2.40242	ENSMUSG00000025646	Atrip	-0.759	0.00794034
Protein phosphatase 1 regulatory subunit 12C	Ppp1r12c	1.73302	ENSMUSG00000019254	Ppp1r12c	-0.666	0.000862763
	Actn1	2.89846	ENSMUSG00000015143	Actn1	-0.557	2.7305e-15
Piezo-type mechanosensitive ion channel component;Piezo-type mechanosensitive ion channel component 1	Piezo1	1.48702	ENSMUSG00000014444	Piezo1	-0.529	3.99903e-05
Putative RNA-binding protein 15B	Rbm15b	4.43778	ENSMUSG00000074102	Rbm15b	-0.478	0.0387211
14-3-3 protein beta/alpha;14-3-3 protein beta/alpha, N-terminally processed	Ywhab	1.90856	ENSMUSG00000018326	Ywhab	-0.446	5.70713e-17
Septin-8	Sept8	1.23748	ENSMUSG00000018398	Sept8	-0.266	0.00505732
Phosphoenolpyruvate carboxykinase [GTP], mitochondrial	Pck2	1.65746	ENSMUSG00000040618	Pck2	-0.218	0.0203393
NADH dehydrogenase [ubiquinone] 1 alpha subcomplex subunit 7	Ndufa7	1.02233	ENSMUSG00000041881	Ndufa7	-0.207	0.0187195
BTB/POZ domain-containing adapter for CUL3-mediated RhoA degradation protein 3	Kctd10	-1.55108	ENSMUSG00000001098	Kctd10	0.259	0.0317141
GRIP and coiled-coil domain-containing protein 2	Gcc2	-1.99892	ENSMUSG00000038039	Gcc2	0.401	0.000294041
UPF0769 protein C21orf59 homolog	1110004E09Rik	-1.08662	ENSMUSG00000022972	1110004E09Rik	0.464	0.0211528
Lamin-B1	Lmnb1	-2.70174	ENSMUSG00000024590	Lmnb1	0.476	0.000468428
Mortality factor 4-like protein 1	Morf4l1	-1.55656	ENSMUSG00000062270	Morf4l1	0.485	7.88222e-05
Lysyl oxidase homolog 3	Loxl3	-2.0655	ENSMUSG00000000693	Loxl3	0.527	0.0129661
G patch domain and KOW motifs-containing protein	Gpkow	-1.16039	ENSMUSG00000031148	Gpkow	0.567	0.0359346
Leucine-rich repeat serine/threonine-protein kinase 2	Lrrk2	-1.12209	ENSMUSG00000036273	Lrrk2	0.655	0.0266182
Serine palmitoyltransferase 1	Sptlc1	-1.32551	ENSMUSG00000021468	Sptlc1	0.67	0.000155952
Receptor expression-enhancing protein 4	Reep4	-1.33776	ENSMUSG00000033589	Reep4	0.753	0.000160565
CD109 antigen	Cd109	-1.05948	ENSMUSG00000046186	Cd109	0.78	0.00103258
ATP-dependent DNA helicase Q1	Recql	-1.25124	ENSMUSG00000030243	Recql	0.781	0.00242723
Dynein light chain Tctex-type 3	Dynlt3	-2.6077	ENSMUSG00000031176	Dynlt3	0.795	2.12927e-19
1,4-alpha-glucan-branching enzyme	Gbe1	-1.39682	ENSMUSG00000022707	Gbe1	0.857	0.00492066
Isovaleryl-CoA dehydrogenase, mitochondrial	Ivd	-2.01258	ENSMUSG00000027332	Ivd	1.059	0.00226763
Kinesin-like protein KIF23	Kif23	-2.80639	ENSMUSG00000032254	Kif23	1.236	1.26402e-16
Prelamin-A/C;Lamin-A/C	Lmna	-1.12994	ENSMUSG00000028063	Lmna	1.519	2.84218e-96
Kinesin-like protein KIF18B	Kif18b	-2.06732	ENSMUSG00000051378	Kif18b	1.565	0.0011248
	Mndal	-3.73025	ENSMUSG00000090272	Mndal	1.621	1.16973e-20
Coiled-coil domain-containing protein 12	Ccdc12	-1.03851	ENSMUSG00000019659	Ccdc12	1.756	1.20602e-07
Farnesyl pyrophosphate synthase	Fdps	-1.01534	ENSMUSG00000059743	Fdps	2.359	1.30599e-24
Delta(24)-sterol reductase	Dhcr24	-1.58497	ENSMUSG00000034926	Dhcr24	2.949	1.58771e-26
Serine protease inhibitor A3G	Serpina3g	-6.33995	ENSMUSG00000041481	Serpina3g	3.359	3.84856e-55
	Serpina3i	-5.89159	ENSMUSG00000079014	Serpina3i	4.758	7.41576e-07
Immunoglobulin superfamily member 10	Igsf10	-1.62624	ENSMUSG00000036334	Igsf10	5.146	7.87106e-73

## Sheet: UPUP_316
Protein names	Gene names	Student's T-test Difference KO_WT	EnsemblGeneID	Symbol	logFC_EXP1vsCTR1	FDR_EXP1vsCTR1
Serpin H1	Serpinh1	1.05735	ENSMUSG00000070436	Serpinh1	0.192	0.047376
NADH dehydrogenase [ubiquinone] 1 beta subcomplex subunit 2, mitochondrial	Ndufb2	2.37093	ENSMUSG00000002416	Ndufb2	0.291	0.00423244
Peptidyl-prolyl cis-trans isomerase C	Ppic	1.18707	ENSMUSG00000024538	Ppic	0.31	0.00101689
MAP kinase-activated protein kinase 2	Mapkapk2	1.41115	ENSMUSG00000016528	Mapkapk2	0.312	0.0262184
Interleukin-6 receptor subunit beta	Il6st	1.62027	ENSMUSG00000021756	Il6st	0.333	0.000165987
LIM domain transcription factor LMO4	Lmo4	1.43905	ENSMUSG00000028266	Lmo4	0.333	9.22529e-06
Wiskott-Aldrich syndrome protein family member 2	Wasf2	1.13604	ENSMUSG00000028868	Wasf2	0.386	7.57938e-05
Autophagy-related protein 101	Atg101	1.38815	ENSMUSG00000037204	Atg101	0.387	0.00241126
Oncostatin-M-specific receptor subunit beta	Osmr	1.16411	ENSMUSG00000022146	Osmr	0.398	0.0104733
Protein enabled homolog	Enah	1.07965	ENSMUSG00000022995	Enah	0.411	6.71503e-09
CCAAT/enhancer-binding protein beta	Cebpb	1.43856	ENSMUSG00000056501	Cebpb	0.435	0.000438828
6-phosphogluconolactonase	Pgls	1.05531	ENSMUSG00000031807	Pgls	0.454	3.36475e-06
Unconventional prefoldin RPB5 interactor	Uri1	1.74968	ENSMUSG00000030421	Uri1	0.465	5.12231e-06
DET1- and DDB1-associated protein 1	Dda1	1.80625	ENSMUSG00000074247	Dda1	0.525	0.000390964
Guanylate kinase	Guk1	1.08965	ENSMUSG00000020444	Guk1	0.554	0.000183524
Pterin-4-alpha-carbinolamine dehydratase 2	Pcbd2	3.05419	ENSMUSG00000021496	Pcbd2	0.581	0.00909085
Nucleotide exchange factor SIL1	Sil1	1.09191	ENSMUSG00000024357	Sil1	0.598	0.0145995
Mitochondrial chaperone BCS1	Bcs1l	1.06914	ENSMUSG00000026172	Bcs1l	0.61	0.0273915
Flavin reductase (NADPH)	Blvrb	1.11241	ENSMUSG00000040466	Blvrb	0.623	0.00514965
Rho GTPase-activating protein 35	Arhgap35	2.13422	ENSMUSG00000058230	Arhgap35	0.627	0.00229434
Integral membrane protein 2B;BRI2, membrane form;BRI2 intracellular domain;BRI2C, soluble form;Bri23 peptide	Itm2b	1.10828	ENSMUSG00000022108	Itm2b	0.632	1.24954e-12
FERM, RhoGEF and pleckstrin domain-containing protein 1	Farp1	1.14449	ENSMUSG00000025555	Farp1	0.634	7.9324e-05
Serum paraoxonase/lactonase 3	Pon3	1.26364	ENSMUSG00000029759	Pon3	0.658	0.00805688
	Pkp2	5.05217	ENSMUSG00000041957	Pkp2	0.664	0.0388028
Sjoegren syndrome nuclear autoantigen 1 homolog	Ssna1	1.05873	ENSMUSG00000026966	Ssna1	0.666	5.51633e-05
Urokinase plasminogen activator surface receptor	Plaur	1.18146	ENSMUSG00000046223	Plaur	0.67	0.0153893
Probable aminopeptidase NPEPL1	Npepl1	3.0507	ENSMUSG00000039263	Npepl1	0.716	0.00729298
Atlastin-3	Atl3	1.01059	ENSMUSG00000024759	Atl3	0.738	7.77083e-06
Transforming growth factor beta receptor type 3	Tgfbr3	2.89997	ENSMUSG00000029287	Tgfbr3	0.748	6.69712e-05
	Mvp	1.10077	ENSMUSG00000030681	Mvp	0.758	0.000263681
Metalloproteinase inhibitor 2	Timp2	1.34274	ENSMUSG00000017466	Timp2	0.77	4.5803e-45
Protein prune homolog 2	Prune2	2.80747	ENSMUSG00000039126	Prune2	0.777	8.40885e-05
Clathrin light chain B	Cltb	1.31377	ENSMUSG00000047547	Cltb	0.784	9.8183e-07
Cathepsin L1;Cathepsin L1 heavy chain;Cathepsin L1 light chain	Ctsl	1.05452	ENSMUSG00000021477	Ctsl	0.823	1.25698e-27
Pleckstrin homology domain-containing family O member 2	Plekho2	1.46274	ENSMUSG00000050721	Plekho2	0.825	8.69381e-05
	Pdia6	6.1739	ENSMUSG00000020571	Pdia6	0.842	2.05741e-28
Disintegrin and metalloproteinase domain-containing protein 9	Adam9	1.36718	ENSMUSG00000031555	Adam9	0.845	0.00290855
Peptidyl-prolyl cis-trans isomerase FKBP11	Fkbp11	1.44684	ENSMUSG00000003355	Fkbp11	0.85	2.10641e-08
Nicotinamide N-methyltransferase	Nnmt	1.98417	ENSMUSG00000032271	Nnmt	0.851	0.000176246
Arpin	Arpin	1.59515	ENSMUSG00000039043	Arpin	0.875	0.00859711
EGF domain-specific O-linked N-acetylglucosamine transferase	Eogt	1.46863	ENSMUSG00000035245	Eogt	0.883	0.000288894
Transmembrane emp24 domain-containing protein 3	Tmed3	1.13988	ENSMUSG00000032353	Tmed3	0.894	1.04821e-11
Ras-related protein R-Ras	Rras	1.18994	ENSMUSG00000038387	Rras	0.895	1.62956e-11
Carnitine O-palmitoyltransferase 1, liver isoform	Cpt1a	1.67492	ENSMUSG00000024900	Cpt1a	0.896	2.58459e-05
Pre-B-cell leukemia transcription factor-interacting protein 1	Pbxip1	2.77671	ENSMUSG00000042613	Pbxip1	0.898	3.42387e-18
Methylglutaconyl-CoA hydratase, mitochondrial	Auh	1.25364	ENSMUSG00000021460	Auh	0.903	0.000458604
Amyloid-like protein 2	Aplp2	1.6598	ENSMUSG00000031996	Aplp2	0.906	6.05559e-33
Guanine nucleotide-binding protein G(I)/G(S)/G(O) subunit gamma-12	Gng12	1.17403	ENSMUSG00000036402	Gng12	0.909	7.66352e-25
GTP:AMP phosphotransferase AK3, mitochondrial	Ak3	1.08578	ENSMUSG00000024782	Ak3	0.911	4.53173e-11
Chondroitin sulfate proteoglycan 4	Cspg4	2.98428	ENSMUSG00000032911	Cspg4	0.915	0.00358759
Oligoribonuclease, mitochondrial	Rexo2	1.08843	ENSMUSG00000032026	Rexo2	0.918	6.34244e-37
TRIO and F-actin-binding protein	Triobp	1.06311	ENSMUSG00000033088	Triobp	0.92	3.32134e-05
ATP-binding cassette sub-family G member 2	Abcg2	1.91952	ENSMUSG00000029802	Abcg2	0.925	6.29589e-08
	Cald1	5.07598	ENSMUSG00000029761	Cald1	0.936	8.76901e-65
Golgi apparatus protein 1	Glg1	1.38687	ENSMUSG00000003316	Glg1	0.936	5.18175e-51
Myeloid-associated differentiation marker	Myadm	1.33465	ENSMUSG00000068566	Myadm	0.946	2.0905e-36
BAG family molecular chaperone regulator 2	Bag2	1.19286	ENSMUSG00000042215	Bag2	0.957	0.0170682
	Ahnak2	1.33923	ENSMUSG00000072812	Ahnak2	0.974	4.74179e-25
COX assembly mitochondrial protein 2 homolog	Cmc2	1.07279	ENSMUSG00000014633	Cmc2	0.98	1.00699e-09
RUS1 family protein C16orf58 homolog	BC017158	3.01065	ENSMUSG00000030780	BC017158	0.996	0.00172721
Long-chain-fatty-acid--CoA ligase 1	Acsl1	1.40366	ENSMUSG00000018796	Acsl1	0.997	1.90666e-08
Rho guanine nucleotide exchange factor 40	Arhgef40	1.32482	ENSMUSG00000004562	Arhgef40	0.997	9.42761e-05
Protein PRRC1	Prrc1	1.32783	ENSMUSG00000024594	Prrc1	1.003	3.82043e-05
Transmembrane protein 59	Tmem59	3.56784	ENSMUSG00000028618	Tmem59	1.03	2.90711e-23
Amine oxidase [flavin-containing] A	Maoa	1.15024	ENSMUSG00000025037	Maoa	1.037	5.30354e-12
Forkhead box protein P1	Foxp1	1.87972	ENSMUSG00000030067	Foxp1	1.043	3.11578e-51
Lipoma-preferred partner homolog	Lpp	1.28701	ENSMUSG00000033306	Lpp	1.051	6.9012e-53
Matrix metalloproteinase-14	Mmp14	1.54109	ENSMUSG00000000957	Mmp14	1.052	2.5369e-38
Ganglioside GM2 activator	Gm2a	1.38522	ENSMUSG00000000594	Gm2a	1.055	2.07922e-05
Isochorismatase domain-containing protein 2A, mitochondrial	Isoc2a	1.81463	ENSMUSG00000086784	Isoc2a	1.063	4.73078e-05
SEC14 domain and spectrin repeat-containing protein 1	Sestd1	2.6335	ENSMUSG00000042272	Sestd1	1.065	4.47424e-13
Adipocyte enhancer-binding protein 1	Aebp1	2.24551	ENSMUSG00000020473	Aebp1	1.079	5.96073e-38
Vacuolar protein sorting-associated protein 4A	Vps4a	1.20655	ENSMUSG00000031913	Vps4a	1.089	1.27287e-06
	Rab4b	1.52259	ENSMUSG00000053291	Rab4b	1.094	0.00545351
Cysteine and glycine-rich protein 1	Csrp1	1.39868	ENSMUSG00000026421	Csrp1	1.107	3.70495e-36
5(3)-deoxyribonucleotidase, cytosolic type	Nt5c	1.28931	ENSMUSG00000020736	Nt5c	1.114	1.41911e-09
FYVE and coiled-coil domain-containing protein 1	Fyco1	4.63223	ENSMUSG00000025241	Fyco1	1.128	8.82112e-08
Protein IMPACT	Impact	1.61	ENSMUSG00000024423	Impact	1.133	5.70402e-14
Succinyl-CoA:3-ketoacid coenzyme A transferase 1, mitochondrial;Succinyl-CoA:3-ketoacid-coenzyme A transferase	Oxct1	1.10711	ENSMUSG00000022186	Oxct1	1.136	3.76457e-55
GDH/6PGL endoplasmic bifunctional protein;Glucose 1-dehydrogenase;6-phosphogluconolactonase	H6pd	2.26813	ENSMUSG00000028980	H6pd	1.138	0.00540507
Cytosolic phospholipase A2;Phospholipase A2;Lysophospholipase	Pla2g4a	1.25464	ENSMUSG00000056220	Pla2g4a	1.142	3.54662e-16
Tyrosine-protein kinase receptor;Insulin-like growth factor 1 receptor;Insulin-like growth factor 1 receptor alpha chain;Insulin-like growth factor 1 receptor beta chain	Igf1r	1.32613	ENSMUSG00000005533	Igf1r	1.144	8.30022e-36
Cysteine and glycine-rich protein 2	Csrp2	1.15738	ENSMUSG00000020186	Csrp2	1.147	1.31908e-22
Enoyl-CoA hydratase, mitochondrial	Echs1	1.39146	ENSMUSG00000025465	Echs1	1.156	2.58459e-05
Vasodilator-stimulated phosphoprotein	Vasp	1.29461	ENSMUSG00000030403	Vasp	1.176	5.50793e-21
AMP deaminase 3	Ampd3	1.89932	ENSMUSG00000005686	Ampd3	1.177	0.0196526
Receptor-interacting serine/threonine-protein kinase 2	Ripk2	1.3867	ENSMUSG00000041135	Ripk2	1.19	1.07347e-05
Collagen alpha-1(V) chain	Col5a1	2.11842	ENSMUSG00000026837	Col5a1	1.204	7.3894e-42
Sorting nexin;Sorting nexin-18	Snx18	1.5716	ENSMUSG00000042364	Snx18	1.205	6.28586e-31
Protein S100-A10	S100a10	1.24937	ENSMUSG00000041959	S100a10	1.207	9.2949e-45
P2X purinoceptor;P2X purinoceptor 4	P2rx4	2.90861	ENSMUSG00000029470	P2rx4	1.214	3.44887e-08
Glypican-1;Secreted glypican-1	Gpc1	1.3522	ENSMUSG00000034220	Gpc1	1.218	1.17343e-28
Eyes absent homolog 4;Eyes absent homolog	Eya4	2.29073	ENSMUSG00000010461	Eya4	1.228	6.24221e-12
Fibrillin-1	Fbn1	1.06697	ENSMUSG00000027204	Fbn1	1.234	2.5189e-28
Delta(3,5)-Delta(2,4)-dienoyl-CoA isomerase, mitochondrial	Ech1	2.2595	ENSMUSG00000053898	Ech1	1.235	4.08972e-13
C-X-C motif chemokine 5;GCP-2(1-78);GCP-2(9-78)	Cxcl5	1.57943	ENSMUSG00000029371	Cxcl5	1.239	1.44193e-95
Aldehyde dehydrogenase, mitochondrial	Aldh2	1.45612	ENSMUSG00000029455	Aldh2	1.242	2.07851e-34
CD81 antigen	Cd81	2.3019	ENSMUSG00000037706	Cd81	1.246	1.49044e-53
Solute carrier family 12 member 2	Slc12a2	1.76649	ENSMUSG00000024597	Slc12a2	1.247	1.02627e-24
Prostaglandin reductase 1	Ptgr1	1.01624	ENSMUSG00000028378	Ptgr1	1.268	1.10457e-08
Fibronectin;Anastellin	Fn1	2.32503	ENSMUSG00000026193	Fn1	1.273	8.88914e-85
Caspase-3;Caspase-3 subunit p17;Caspase-3 subunit p12	Casp3	1.14938	ENSMUSG00000031628	Casp3	1.277	4.78129e-22
Vacuolar protein sorting-associated protein 37C	Vps37c	1.41646	ENSMUSG00000048832	Vps37c	1.283	0.0246852
Integral membrane protein 2C;CT-BRI3	Itm2c	1.54321	ENSMUSG00000026223	Itm2c	1.29	6.64498e-19
Platelet-derived growth factor receptor beta	Pdgfrb	1.78346	ENSMUSG00000024620	Pdgfrb	1.297	9.78675e-06
	Abcc4	2.36677	ENSMUSG00000032849	Abcc4	1.316	2.38248e-06
Ornithine aminotransferase, mitochondrial	Oat	1.26468	ENSMUSG00000030934	Oat	1.342	1.4297e-27
Bifunctional 3-phosphoadenosine 5-phosphosulfate synthase 2;Sulfate adenylyltransferase;Adenylyl-sulfate kinase	Papss2	2.93545	ENSMUSG00000024899	Papss2	1.353	0.000946098
Kinesin-like protein;Kinesin-like protein KIF21A	Kif21a	2.10465	ENSMUSG00000022629	Kif21a	1.357	4.60256e-16
Inhibitor of nuclear factor kappa-B kinase-interacting protein	Ikbip	1.29335	ENSMUSG00000019975	Ikbip	1.366	4.43924e-33
N(4)-(beta-N-acetylglucosaminyl)-L-asparaginase;Glycosylasparaginase alpha chain;Glycosylasparaginase beta chain	Aga	1.17999	ENSMUSG00000031521	Aga	1.369	4.86229e-08
Cysteine sulfinic acid decarboxylase	Csad	1.08173	ENSMUSG00000023044	Csad	1.378	4.6713e-15
Superoxide dismutase [Mn], mitochondrial	Sod2	1.36287	ENSMUSG00000006818	Sod2	1.411	2.18288e-29
Mammalian ependymin-related protein 1	Epdr1	1.71212	ENSMUSG00000002808	Epdr1	1.417	7.13204e-08
Chitinase domain-containing protein 1	Chid1	1.04163	ENSMUSG00000025512	Chid1	1.42	7.1591e-09
	Chd3	1.06973	ENSMUSG00000018474	Chd3	1.431	4.31547e-82
Natural resistance-associated macrophage protein 2	Slc11a2	2.37764	ENSMUSG00000023030	Slc11a2	1.431	4.41527e-20
Annexin A7	Anxa7	1.26216	ENSMUSG00000021814	Anxa7	1.434	1.12197e-09
Kinesin-like protein;Kinesin-like protein KIF14	Kif14	2.00462	ENSMUSG00000041498	Kif14	1.44	2.92533e-19
Short/branched chain specific acyl-CoA dehydrogenase, mitochondrial	Acadsb	1.25622	ENSMUSG00000030861	Acadsb	1.441	6.32781e-21
Acyl-CoA:lysophosphatidylglycerol acyltransferase 1	Lpgat1	1.72594	ENSMUSG00000026623	Lpgat1	1.452	8.78857e-37
TRPM8 channel-associated factor 2	Tcaf2	1.0385	ENSMUSG00000029851	Tcaf2	1.46	5.27387e-05
S-formylglutathione hydrolase	Esd	1.39914	ENSMUSG00000021996	Esd	1.471	9.37235e-108
Protein-tyrosine-phosphatase;Receptor-type tyrosine-protein phosphatase kappa	Ptprk	1.76269	ENSMUSG00000019889	Ptprk	1.475	4.49919e-15
Kelch domain-containing protein 4	Klhdc4	1.45197	ENSMUSG00000040263	Klhdc4	1.476	7.3002e-19
Prolow-density lipoprotein receptor-related protein 1;Low-density lipoprotein receptor-related protein 1 85 kDa subunit;Low-density lipoprotein receptor-related protein 1 515 kDa subunit;Low-density lipoprotein receptor-related protein 1 intracellular domain	Lrp1	1.13953	ENSMUSG00000040249	Lrp1	1.486	2.62737e-54
TBC1 domain family member 2B	Tbc1d2b	1.7502	ENSMUSG00000037410	Tbc1d2b	1.508	2.96776e-09
Ephrin type-B receptor 3	Ephb3	1.11355	ENSMUSG00000005958	Ephb3	1.527	7.15184e-11
Long-chain-fatty-acid--CoA ligase 4	Acsl4	1.21111	ENSMUSG00000031278	Acsl4	1.528	1.62987e-27
Catalase	Cat	1.02373	ENSMUSG00000027187	Cat	1.535	6.29641e-12
Nucleolar protein 3	Nol3	1.76869	ENSMUSG00000014776	Nol3	1.542	4.68829e-08
Reticulocalbin-1	Rcn1	1.4018	ENSMUSG00000005973	Rcn1	1.548	6.98805e-46
Receptor-interacting serine/threonine-protein kinase 3	Ripk3	1.40303	ENSMUSG00000022221	Ripk3	1.549	7.30486e-24
Ferritin heavy chain;Ferritin heavy chain, N-terminally processed	Fth1	1.84018	ENSMUSG00000024661	Fth1	1.568	4.34804e-89
Chondroitin sulfate synthase 1	Chsy1	1.18213	ENSMUSG00000032640	Chsy1	1.573	4.07611e-23
BAG family molecular chaperone regulator 3	Bag3	1.13375	ENSMUSG00000030847	Bag3	1.579	1.66193e-24
SH3 domain-containing protein 19	Sh3d19	1.37137	ENSMUSG00000028082	Sh3d19	1.604	4.9435e-21
Probable glutathione peroxidase 8	Gpx8	1.00549	ENSMUSG00000021760	Gpx8	1.61	3.70231e-32
Collagen alpha-2(I) chain	Col1a2	1.0275	ENSMUSG00000029661	Col1a2	1.614	7.27085e-286
Serine/threonine-protein kinase DCLK1	Dclk1	1.10169	ENSMUSG00000027797	Dclk1	1.634	5.11133e-39
PDZ and LIM domain protein 5	Pdlim5	1.54523	ENSMUSG00000028273	Pdlim5	1.639	7.42807e-27
	Tpm1	1.30508	ENSMUSG00000032366	Tpm1	1.668	2.21859e-276
Mannose-1-phosphate guanyltransferase alpha	Gmppa	1.3248	ENSMUSG00000033021	Gmppa	1.672	9.7658e-11
Glutathione peroxidase 7	Gpx7	2.00974	ENSMUSG00000028597	Gpx7	1.693	0.000134585
Collagen alpha-1(I) chain	Col1a1	1.1891	ENSMUSG00000001506	Col1a1	1.695	4.65599e-170
Lactoylglutathione lyase	Glo1	1.04264	ENSMUSG00000024026	Glo1	1.709	1.40717e-40
Calcium/calmodulin-dependent protein kinase type II subunit gamma	Camk2g	1.27022	ENSMUSG00000021820	Camk2g	1.72	1.6674e-20
Vinexin	Sorbs3	2.28473	ENSMUSG00000022091	Sorbs3	1.729	0.00966735
Palladin	Palld	1.40058	ENSMUSG00000058056	Palld	1.748	1.39302e-173
Pyroglutamyl-peptidase 1	Pgpep1	2.08083	ENSMUSG00000056204	Pgpep1	1.755	7.99351e-17
Heat shock protein beta-6	Hspb6	3.32803	ENSMUSG00000036854	Hspb6	1.761	1.37496e-39
Transgelin	Tagln	1.24891	ENSMUSG00000032085	Tagln	1.763	5.18621e-95
	Vcam1	1.08872	ENSMUSG00000027962	Vcam1	1.769	1.81211e-133
Cadherin-11	Cdh11	1.59047	ENSMUSG00000031673	Cdh11	1.8	3.21502e-96
Dehydrogenase/reductase SDR family member 4	Dhrs4	2.14408	ENSMUSG00000022210	Dhrs4	1.803	1.37031e-15
Follistatin-related protein 1	Fstl1	1.2373	ENSMUSG00000022816	Fstl1	1.806	1.60503e-225
	Fat1	1.97017	ENSMUSG00000070047	Fat1	1.844	3.34693e-17
Forkhead box protein C1	Foxc1	3.59214	ENSMUSG00000050295	Foxc1	1.875	3.72313e-37
Glutamine--fructose-6-phosphate aminotransferase [isomerizing] 2	Gfpt2	2.75864	ENSMUSG00000020363	Gfpt2	1.878	1.32912e-06
Glyoxalase domain-containing protein 4	Glod4	1.34246	ENSMUSG00000017286	Glod4	1.886	2.96096e-18
PDZ and LIM domain protein 2	Pdlim2	1.02274	ENSMUSG00000022090	Pdlim2	1.893	4.22324e-71
Xanthine dehydrogenase/oxidase;Xanthine dehydrogenase;Xanthine oxidase	Xdh	1.72622	ENSMUSG00000024066	Xdh	1.903	4.96732e-33
Ribosyldihydronicotinamide dehydrogenase [quinone]	Nqo2	2.58861	ENSMUSG00000046949	Nqo2	1.932	9.25456e-20
O-acetyl-ADP-ribose deacetylase MACROD1	Macrod1	2.8554	ENSMUSG00000036278	Macrod1	1.935	9.85484e-07
Annexin A1	Anxa1	1.78813	ENSMUSG00000024659	Anxa1	1.939	3.29336e-51
Protein-glutamine gamma-glutamyltransferase 2	Tgm2	5.23174	ENSMUSG00000037820	Tgm2	1.942	5.09166e-32
Tubulin beta-3 chain	Tubb3	2.06206	ENSMUSG00000062380	Tubb3	1.949	2.33714e-22
Reticulocalbin-3	Rcn3	1.7475	ENSMUSG00000019539	Rcn3	1.954	5.79052e-111
Amyloid beta A4 precursor protein-binding family B member 1-interacting protein	Apbb1ip	1.6924	ENSMUSG00000026786	Apbb1ip	1.955	6.65695e-33
Sodium/potassium-transporting ATPase subunit beta-1	Atp1b1	2.34241	ENSMUSG00000026576	Atp1b1	1.957	5.8433e-25
Suppression of tumorigenicity 5 protein	St5	1.46763	ENSMUSG00000031024	St5	1.97	4.40936e-35
Glutathione S-transferase Mu 2	Gstm2	1.18471	ENSMUSG00000040562	Gstm2	1.973	1.34573e-47
6-phosphogluconate dehydrogenase, decarboxylating	Pgd	1.00273	ENSMUSG00000028961	Pgd	1.974	7.54192e-73
Protein FAM3C	Fam3c	2.89826	ENSMUSG00000029672	Fam3c	1.978	2.34136e-42
Nuclear factor of activated T-cells, cytoplasmic 4	Nfatc4	2.16141	ENSMUSG00000023411	Nfatc4	1.986	7.86686e-52
Complement C3;Complement C3 beta chain;C3-beta-c;Complement C3 alpha chain;C3a anaphylatoxin;Acylation stimulating protein;Complement C3b alpha chain;Complement C3c alpha chain fragment 1;Complement C3dg fragment;Complement C3g fragment;Complement C3d fragment;Complement C3f fragment;Complement C3c alpha chain fragment 2	C3	5.64524	ENSMUSG00000024164	C3	1.994	9.97641e-69
Protein-methionine sulfoxide oxidase MICAL2	Mical2	1.07087	ENSMUSG00000038244	Mical2	1.994	5.84847e-31
Immunity-related GTPase family Q protein	Irgq	1.18561	ENSMUSG00000041037	Irgq	2.002	6.56082e-15
Aminopeptidase B	Rnpep	3.31815	ENSMUSG00000041926	Rnpep	2.014	2.09325e-14
Tropomyosin beta chain	Tpm2	1.73213	ENSMUSG00000028464	Tpm2	2.014	5.44345e-164
Matrix-remodeling-associated protein 8	Mxra8	2.41972	ENSMUSG00000029070	Mxra8	2.02	1.7767e-54
Golgi integral membrane protein 4	Golim4	1.13057	ENSMUSG00000034109	Golim4	2.037	4.38682e-63
Anthrax toxin receptor 1	Antxr1	1.35598	ENSMUSG00000033420	Antxr1	2.04	1.19887e-24
Medium-chain specific acyl-CoA dehydrogenase, mitochondrial	Acadm	1.17712	ENSMUSG00000062908	Acadm	2.062	4.64288e-21
Profilin-2	Pfn2	1.48267	ENSMUSG00000027805	Pfn2	2.065	2.294e-09
Glutathione S-transferase Mu 1	Gstm1	1.30958	ENSMUSG00000058135	Gstm1	2.076	2.87284e-65
Pleckstrin homology-like domain family A member 3	Phlda3	1.81905	ENSMUSG00000041801	Phlda3	2.087	2.66604e-36
Talin-2	Tln2	3.1864	ENSMUSG00000052698	Tln2	2.108	6.72309e-26
Na(+)/H(+) exchange regulatory cofactor NHE-RF1	Slc9a3r1	1.89774	ENSMUSG00000020733	Slc9a3r1	2.114	8.53995e-13
Tyrosine-protein kinase;Tyrosine-protein kinase JAK2	Jak2	3.09661	ENSMUSG00000024789	Jak2	2.13	1.26201e-30
Protein bicaudal C homolog 1	Bicc1	2.18529	ENSMUSG00000014329	Bicc1	2.136	7.57173e-104
Estradiol 17-beta-dehydrogenase 11	Hsd17b11	1.15845	ENSMUSG00000029311	Hsd17b11	2.154	5.68436e-24
Versican core protein	Vcan	2.85233	ENSMUSG00000021614	Vcan	2.163	2.35287e-213
Type 2 phosphatidylinositol 4,5-bisphosphate 4-phosphatase	Tmem55a	1.55918	ENSMUSG00000028221	Tmem55a	2.17	1.36271e-24
Carboxypeptidase E	Cpe	2.45372	ENSMUSG00000037852	Cpe	2.181	3.57124e-111
Protein-lysine 6-oxidase	Lox	1.76389	ENSMUSG00000024529	Lox	2.184	1.47371e-243
Protein C19orf12 homolog	1600014C10Rik	3.49693	ENSMUSG00000054676	1600014C10Rik	2.189	1.31142e-09
Homeobox protein Meis2	Meis2	1.69694	ENSMUSG00000027210	Meis2	2.194	7.58129e-65
PRKC apoptosis WT1 regulator protein	Pawr	5.6888	ENSMUSG00000035873	Pawr	2.227	5.88352e-28
Annexin A6	Anxa6	1.44824	ENSMUSG00000018340	Anxa6	2.339	5.32387e-176
Copine-8	Cpne8	2.45696	ENSMUSG00000052560	Cpne8	2.346	4.28799e-20
MAGUK p55 subfamily member 2	Mpp2	2.30256	ENSMUSG00000017314	Mpp2	2.357	5.14376e-10
Collagen alpha-1(XVIII) chain;Endostatin	Col18a1	2.08101	ENSMUSG00000001435	Col18a1	2.358	7.60873e-15
Fibronectin type-III domain-containing protein 3A	Fndc3a	1.83027	ENSMUSG00000033487	Fndc3a	2.367	1.55055e-63
Paired mesoderm homeobox protein 1	Prrx1	2.00204	ENSMUSG00000026586	Prrx1	2.433	3.50198e-158
Secernin-1	Scrn1	2.78109	ENSMUSG00000019124	Scrn1	2.434	3.08517e-17
Destrin	Dstn	1.00181	ENSMUSG00000015932	Dstn	2.442	7.20366e-248
ADP-ribosylation factor GTPase-activating protein 3	Arfgap3	1.08306	ENSMUSG00000054277	Arfgap3	2.444	1.38389e-51
BTB/POZ domain-containing protein KCTD15	Kctd15	2.00022	ENSMUSG00000030499	Kctd15	2.473	2.10756e-11
Growth arrest-specific protein 1	Gas1	4.84248	ENSMUSG00000052957	Gas1	2.476	6.06632e-124
Transmembrane protein 176B	Tmem176b	3.15491	ENSMUSG00000029810	Tmem176b	2.485	6.953e-270
Nexilin	Nexn	1.9932	ENSMUSG00000039103	Nexn	2.495	1.43582e-118
Platelet-derived growth factor receptor alpha	Pdgfra	1.29361	ENSMUSG00000029231	Pdgfra	2.499	2.44642e-25
Heat shock protein beta-8	Hspb8	1.07937	ENSMUSG00000041548	Hspb8	2.504	3.19223e-46
Microtubule-associated protein 1A;MAP1A heavy chain;MAP1 light chain LC2	Map1a	1.9987	ENSMUSG00000027254	Map1a	2.544	9.32579e-60
Glutaredoxin-1	Glrx	1.13308	ENSMUSG00000021591	Glrx	2.593	1.10188e-26
Thrombospondin-1	Thbs1	1.8567	ENSMUSG00000040152	Thbs1	2.608	5.17174e-118
Phosphoinositide phospholipase C;1-phosphatidylinositol 4,5-bisphosphate phosphodiesterase delta-1	Plcd1	2.51017	ENSMUSG00000010660	Plcd1	2.617	2.84881e-14
Guanine nucleotide-binding protein G(o) subunit alpha	Gnao1	4.05712	ENSMUSG00000031748	Gnao1	2.619	1.86764e-53
Aspartyl aminopeptidase	Dnpep	1.49095	ENSMUSG00000026209	Dnpep	2.633	1.28156e-58
	Serpinb9	2.23774	ENSMUSG00000045827	Serpinb9	2.641	1.81024e-26
Pre-B-cell leukemia transcription factor 1	Pbx1	2.00208	ENSMUSG00000052534	Pbx1	2.643	6.97749e-140
Peptidyl-prolyl cis-trans isomerase FKBP7	Fkbp7	2.07677	ENSMUSG00000002732	Fkbp7	2.66	5.37493e-51
EH domain-containing protein 2	Ehd2	1.23943	ENSMUSG00000074364	Ehd2	2.688	1.12715e-95
Transforming growth factor beta-1-induced transcript 1 protein	Tgfb1i1	1.41082	ENSMUSG00000030782	Tgfb1i1	2.714	1.19065e-51
Zinc finger C2HC domain-containing protein 1A	Zc2hc1a	1.68171	ENSMUSG00000043542	Zc2hc1a	2.718	7.81822e-58
	Ifi204	1.00406	ENSMUSG00000073489	Ifi204	2.727	5.04177e-46
Lymphocyte antigen 6A-2/6E-1	Ly6a	3.63022	ENSMUSG00000075602	Ly6a	2.74	1.41016e-264
Carbonyl reductase [NADPH] 3	Cbr3	4.00449	ENSMUSG00000022947	Cbr3	2.75	4.62236e-22
Nidogen-1	Nid1	1.98753	ENSMUSG00000005397	Nid1	2.808	4.6917e-69
Testin	Tes	1.04947	ENSMUSG00000029552	Tes	2.83	1.86698e-128
Rho GDP-dissociation inhibitor 2	Arhgdib	2.37858	ENSMUSG00000030220	Arhgdib	2.889	4.42778e-130
Alpha-crystallin B chain	Cryab	4.06651	ENSMUSG00000032060	Cryab	2.911	1.63062e-39
Four and a half LIM domains protein 1	Fhl1	4.00324	ENSMUSG00000023092	Fhl1	2.924	7.95195e-20
Aminopeptidase N	Anpep	5.64223	ENSMUSG00000039062	Anpep	2.949	4.31107e-08
RNA-binding protein with multiple splicing	Rbpms	3.50304	ENSMUSG00000031586	Rbpms	2.973	5.76565e-41
	Lrrc32	2.2415	ENSMUSG00000090958	Lrrc32	2.976	2.29078e-52
Ankyrin-3	Ank3	1.03351	ENSMUSG00000069601	Ank3	2.999	8.17253e-116
Latexin	Lxn	1.83646	ENSMUSG00000047557	Lxn	3	1.14084e-48
	2210016F16Rik	2.19514	ENSMUSG00000021550	2210016F16Rik	3.029	1.53147e-19
Neuropilin-1	Nrp1	1.32233	ENSMUSG00000025810	Nrp1	3.105	1.99212e-73
Prostaglandin G/H synthase 1	Ptgs1	3.96362	ENSMUSG00000047250	Ptgs1	3.145	1.05537e-50
Death-associated protein 1	Dap	1.39104	ENSMUSG00000039168	Dap	3.146	9.37006e-120
Prolyl 4-hydroxylase subunit alpha-3	P4ha3	1.87254	ENSMUSG00000051048	P4ha3	3.15	5.37107e-30
Tumor necrosis factor receptor superfamily member 6	Fas	1.0705	ENSMUSG00000024778	Fas	3.202	5.07914e-22
L-xylulose reductase	Dcxr	4.82653	ENSMUSG00000039450	Dcxr	3.211	6.85042e-58
Calcium-transporting ATPase	Atp2b4	1.40412	ENSMUSG00000026463	Atp2b4	3.216	1.73967e-38
Tubulin beta-2A chain	Tubb2a	1.15897	ENSMUSG00000058672	Tubb2a	3.221	6.18114e-107
Microsomal glutathione S-transferase 1	Mgst1	3.49167	ENSMUSG00000008540	Mgst1	3.227	2.06807e-22
72 kDa type IV collagenase;PEX	Mmp2	3.90798	ENSMUSG00000031740	Mmp2	3.268	9.59443e-135
Cytokine receptor-like factor 1	Crlf1	2.51338	ENSMUSG00000007888	Crlf1	3.322	9.60105e-137
Guanidinoacetate N-methyltransferase	Gamt	1.98702	ENSMUSG00000020150	Gamt	3.352	5.11434e-24
	Maged2	1.91889	ENSMUSG00000025268	Maged2	3.365	6.83091e-89
Cytochrome b5	Cyb5a	1.71641	ENSMUSG00000024646	Cyb5a	3.445	4.86282e-160
Paired mesoderm homeobox protein 2	Prrx2	3.07331	ENSMUSG00000039476	Prrx2	3.449	1.53328e-107
Isocitrate dehydrogenase [NADP] cytoplasmic	Idh1	1.25922	ENSMUSG00000025950	Idh1	3.501	5.94184e-35
Protein phosphatase 1 regulatory subunit;Protein phosphatase 1 regulatory subunit 12B	Ppp1r12b	4.10664	ENSMUSG00000073557	Ppp1r12b	3.53	2.98848e-23
Serum amyloid A-3 protein	Saa3	5.67843	ENSMUSG00000040026	Saa3	3.577	0
Neutrophil gelatinase-associated lipocalin	Lcn2	4.04248	ENSMUSG00000026822	Lcn2	3.595	4.5677e-264
Epidermal growth factor receptor	Egfr	3.92677	ENSMUSG00000020122	Egfr	3.6	7.07885e-49
Epoxide hydrolase 1	Ephx1	2.74287	ENSMUSG00000038776	Ephx1	3.606	3.29853e-94
Thymosin beta-4;Hematopoietic system regulatory peptide	Tmsb4x	1.59012	ENSMUSG00000049775	Tmsb4x	3.632	5.35334e-251
	Mettl7a1	3.97038	ENSMUSG00000054619	Mettl7a1	3.65	1.69546e-08
Sorbin and SH3 domain-containing protein 1	Sorbs1	3.50173	ENSMUSG00000025006	Sorbs1	3.737	2.11171e-50
Delta-sarcoglycan	Sgcd	3.33206	ENSMUSG00000020354	Sgcd	3.762	3.14294e-11
PTB-containing, cubilin and LRP1-interacting protein	Pid1	2.72412	ENSMUSG00000045658	Pid1	3.792	3.67991e-22
BTB/POZ domain-containing protein KCTD12	Kctd12	3.88073	ENSMUSG00000098557	Kctd12	3.819	0.000126829
Myosin regulatory light polypeptide 9	Myl9	3.36891	ENSMUSG00000067818	Myl9	3.861	1.39286e-244
	Lmo7	3.8129	ENSMUSG00000033060	Lmo7	3.868	3.87667e-51
Cysteine-rich protein 1	Crip1	1.37434	ENSMUSG00000006360	Crip1	3.917	5.99475e-26
Protein Niban	Fam129a	6.56518	ENSMUSG00000026483	Fam129a	3.968	1.33176e-85
Synaptopodin	Synpo	4.44379	ENSMUSG00000043079	Synpo	3.97	7.04504e-65
Ceruloplasmin	Cp	4.53578	ENSMUSG00000003617	Cp	4.161	7.37541e-112
Collagen alpha-1(III) chain	Col3a1	1.63917	ENSMUSG00000026043	Col3a1	4.177	0
Creatine kinase B-type	Ckb	3.82267	ENSMUSG00000001270	Ckb	4.205	5.02752e-13
UPF0317 protein C14orf159 homolog, mitochondrial	9030617O03Rik	3.53914	ENSMUSG00000021185	9030617O03Rik	4.392	7.88608e-29
4-aminobutyrate aminotransferase, mitochondrial	Abat	1.19478	ENSMUSG00000057880	Abat	4.404	1.2052e-09
Stromal cell-derived factor 1	Cxcl12	4.81044	ENSMUSG00000061353	Cxcl12	4.446	0
Collagen alpha-1(XII) chain	Col12a1	3.54062	ENSMUSG00000032332	Col12a1	4.506	1.34262e-164
Endosialin	Cd248	3.03271	ENSMUSG00000056481	Cd248	4.546	3.63949e-76
Retinol-binding protein 1	Rbp1	5.18103	ENSMUSG00000046402	Rbp1	4.569	2.75649e-98
	Akr1c14	1.31229	ENSMUSG00000033715	Akr1c14	4.589	7.22289e-08
Monocyte differentiation antigen CD14	Cd14	1.76012	ENSMUSG00000051439	Cd14	4.651	4.08168e-15
NAD(P)H dehydrogenase [quinone] 1	Nqo1	5.33163	ENSMUSG00000003849	Nqo1	4.715	1.88617e-61
Latent-transforming growth factor beta-binding protein 2	Ltbp2	3.74299	ENSMUSG00000002020	Ltbp2	4.923	2.59598e-147
L-lactate dehydrogenase B chain;L-lactate dehydrogenase	Ldhb	4.49522	ENSMUSG00000030246	Ldhb	4.943	3.59002e-28
Neprilysin	Mme	9.55247	ENSMUSG00000027820	Mme	5.065	3.21408e-152
Carbonyl reductase [NADPH] 2	Cbr2	4.01514	ENSMUSG00000025150	Cbr2	5.188	0
Acyl-coenzyme A thioesterase 1	Acot1	2.80595	ENSMUSG00000072949	Acot1	5.269	5.3612e-29
Thy-1 membrane glycoprotein	Thy1	5.48668	ENSMUSG00000032011	Thy1	5.275	1.46551e-144
Metalloreductase STEAP4	Steap4	4.82293	ENSMUSG00000012428	Steap4	5.295	8.1789e-13
Guanine nucleotide-binding protein subunit alpha-14	Gna14	1.1612	ENSMUSG00000024697	Gna14	5.561	9.05388e-07
Embigin	Emb	5.87162	ENSMUSG00000021728	Emb	5.642	1.49959e-171
Fatty acid-binding protein, adipocyte	Fabp4	5.11205	ENSMUSG00000062515	Fabp4	5.756	1.89125e-59
Heat shock protein beta-1	Hspb1	8.48905	ENSMUSG00000004951	Hspb1	6.006	2.11615e-112
Interleukin-1 receptor antagonist protein	Il1rn	2.57939	ENSMUSG00000026981	Il1rn	6.065	1.57654e-80
Aldehyde oxidase 1	Aox1	1.78253	ENSMUSG00000063558	Aox1	6.283	2.31449e-12
Musculoskeletal embryonic nuclear protein 1	Mustn1	3.48542	ENSMUSG00000042485	Mustn1	6.315	2.02646e-127
Ras-related protein Rab-32	Rab32	3.06667	ENSMUSG00000019832	Rab32	6.801	7.41446e-31
Dimethylaniline monooxygenase [N-oxide-forming] 1	Fmo1	3.4584	ENSMUSG00000040181	Fmo1	6.878	3.82728e-14
Prostatic acid phosphatase	Acpp	4.13896	ENSMUSG00000032561	Acpp	7.091	9.44038e-20
1-phosphatidylinositol 4,5-bisphosphate phosphodiesterase beta-1	Plcb1	1.68087	ENSMUSG00000051177	Plcb1	7.117	7.65837e-68
Cytochrome P450 1B1	Cyp1b1	3.41631	ENSMUSG00000024087	Cyp1b1	7.191	0
Calponin-1	Cnn1	7.42698	ENSMUSG00000001349	Cnn1	7.576	9.25647e-105
Collagen alpha-1(XIV) chain	Col14a1	1.20107	ENSMUSG00000022371	Col14a1	7.604	3.14553e-24
GDNF family receptor alpha-2	Gfra2	2.26766	ENSMUSG00000022103	Gfra2	7.629	3.14516e-63
Leukocyte elastase inhibitor A	Serpinb1a	6.60587	ENSMUSG00000044734	Serpinb1a	7.725	5.22317e-62
Cytidine deaminase	Cda	1.97749	ENSMUSG00000028755	Cda	7.817	7.70718e-23
Actin, gamma-enteric smooth muscle	Actg2	5.25658	ENSMUSG00000059430	Actg2	7.884	0
	Kank1	1.60139	ENSMUSG00000032702	Kank1	7.962	1.34308e-78
	2200002D01Rik	1.70637	ENSMUSG00000030587	2200002D01Rik	8.757	1.97379e-58
Matrix Gla protein	Mgp	3.8682	ENSMUSG00000030218	Mgp	9.172	0
Prostacyclin synthase	Ptgis	6.93536	ENSMUSG00000017969	Ptgis	9.287	2.63405e-73
Leiomodin-1	Lmod1	5.89981	ENSMUSG00000048096	Lmod1	9.368	2.80499e-141
Collagen alpha-1(II) chain;Collagen alpha-1(II) chain;Chondrocalcin	Col2a1	4.34126	ENSMUSG00000022483	Col2a1	10.085	0
Glia-derived nexin	Serpine2	6.21114	ENSMUSG00000026249	Serpine2	10.575	0

## Sheet: GO_KEGG_UPUP_316
Annotation Cluster 1	Enrichment Score: 8.096897527490908
Category	Term	Count	Genes	FDR
GOTERM_BP_FAT	GO:0030334~regulation of cell migration	42	CYP1B1, CXCL5, IL6ST, LMO4, COL3A1, PAWR, CXCL12, TPM1, MMP2, KANK1, IGF1R, PFN2, RRAS, THBS1, PLCB1, ADAM9, FN1, ARHGDIB, EGFR, COL18A1, KIF14, PTPRK, IL1RN, ANXA1, ARPIN, SLC9A3R1, NEXN, MMP14, MYADM, FOXP1, THY1, LRP1, PKP2, PDGFRA, RIPK3, PDGFRB, TGFBR3, TCAF2, HSPB1, TMSB4X, JAK2, COL1A1	1.47214e-08
GOTERM_BP_FAT	GO:2000145~regulation of cell motility	43	CYP1B1, CXCL5, IL6ST, LMO4, COL3A1, PAWR, CXCL12, TPM1, MMP2, KANK1, IGF1R, PFN2, RRAS, THBS1, PLCB1, ADAM9, FN1, ARHGDIB, EGFR, KIF14, COL18A1, PTPRK, IL1RN, ANXA1, ARPIN, SLC9A3R1, NEXN, MMP14, MYADM, FOXP1, THY1, LRP1, PKP2, CD81, PDGFRA, RIPK3, PDGFRB, TGFBR3, TCAF2, HSPB1, TMSB4X, JAK2, COL1A1	1.97745e-08
GOTERM_BP_FAT	GO:0040012~regulation of locomotion	44	NRP1, CYP1B1, CXCL5, IL6ST, LMO4, COL3A1, PAWR, CXCL12, TPM1, MMP2, KANK1, IGF1R, PFN2, RRAS, THBS1, PLCB1, ADAM9, FN1, ARHGDIB, EGFR, KIF14, COL18A1, PTPRK, IL1RN, ANXA1, ARPIN, SLC9A3R1, NEXN, MMP14, MYADM, FOXP1, THY1, LRP1, PKP2, CD81, PDGFRA, RIPK3, PDGFRB, TGFBR3, TCAF2, HSPB1, TMSB4X, JAK2, COL1A1	2.26191e-08
GOTERM_BP_FAT	GO:0051270~regulation of cellular component movement	44	NRP1, CYP1B1, CXCL5, IL6ST, LMO4, COL3A1, PAWR, CXCL12, TPM1, MMP2, KANK1, IGF1R, PFN2, RRAS, THBS1, PLCB1, ADAM9, FN1, ARHGDIB, EGFR, KIF14, COL18A1, PTPRK, IL1RN, ANXA1, ARPIN, SLC9A3R1, NEXN, MMP14, MYADM, FOXP1, THY1, LRP1, PKP2, CD81, PDGFRA, RIPK3, PDGFRB, TGFBR3, TCAF2, HSPB1, TMSB4X, JAK2, COL1A1	6.52288e-08
GOTERM_BP_FAT	GO:0040011~locomotion	62	ENAH, NRP1, IL6ST, LMO4, WASF2, CSPG4, PAWR, CXCL12, MMP2, KANK1, ATP2B4, ANK3, RRAS, PLCB1, TUBB3, ADAM9, EGFR, KIF14, PTPRK, SAA3, ARPIN, SLC9A3R1, PALLD, NEXN, MMP14, MYADM, VASP, THY1, CD81, RIPK3, PDGFRA, HSPB1, PDGFRB, TMSB4X, FOXC1, COL1A1, CYP1B1, CXCL5, CD248, COL3A1, ARHGAP35, EPHB3, TPM1, VCAM1, IGF1R, PFN2, FAT1, THBS1, DCLK1, ARHGDIB, FN1, COL18A1, IL1RN, ANXA1, GAS1, FOXP1, COL5A1, …	8.41832e-08
GOTERM_BP_FAT	GO:0006928~movement of cell or subcellular component	66	ENAH, NRP1, IL6ST, LMO4, WASF2, CSPG4, PAWR, MMP2, CXCL12, KANK1, DSTN, ATP2B4, ANK3, RRAS, PLCB1, TUBB3, ADAM9, EGFR, KIF14, PTPRK, SAA3, ARPIN, SLC9A3R1, MMP14, PALLD, NEXN, MYADM, VASP, THY1, CD81, RIPK3, PDGFRA, HSPB1, PDGFRB, TMSB4X, FOXC1, COL1A1, CYP1B1, CXCL5, CD248, COL3A1, ARHGAP35, EPHB3, TPM1, VCAM1, IGF1R, PFN2, FAT1, THBS1, KIF21A, FYCO1, DCLK1, ARHGDIB, FN1, COL18A1, IL1RN, ANXA1, …	1.87872e-07
GOTERM_BP_FAT	GO:0051674~localization of cell	56	NRP1, IL6ST, LMO4, WASF2, CSPG4, PAWR, CXCL12, MMP2, KANK1, ATP2B4, RRAS, PLCB1, ADAM9, EGFR, KIF14, PTPRK, SAA3, ARPIN, SLC9A3R1, PALLD, NEXN, MMP14, MYADM, THY1, RIPK3, PDGFRA, HSPB1, PDGFRB, FOXC1, TMSB4X, COL1A1, CYP1B1, CXCL5, CD248, COL3A1, ARHGAP35, EPHB3, TPM1, VCAM1, IGF1R, PFN2, FAT1, THBS1, DCLK1, FN1, ARHGDIB, COL18A1, IL1RN, ANXA1, FOXP1, COL5A1, LRP1, PKP2, TGFBR3, TCAF2, JAK2	4.0762e-07
GOTERM_BP_FAT	GO:0048870~cell motility	56	NRP1, IL6ST, LMO4, WASF2, CSPG4, PAWR, CXCL12, MMP2, KANK1, ATP2B4, RRAS, PLCB1, ADAM9, EGFR, KIF14, PTPRK, SAA3, ARPIN, SLC9A3R1, PALLD, NEXN, MMP14, MYADM, THY1, RIPK3, PDGFRA, HSPB1, PDGFRB, FOXC1, TMSB4X, COL1A1, CYP1B1, CXCL5, CD248, COL3A1, ARHGAP35, EPHB3, TPM1, VCAM1, IGF1R, PFN2, FAT1, THBS1, DCLK1, FN1, ARHGDIB, COL18A1, IL1RN, ANXA1, FOXP1, COL5A1, LRP1, PKP2, TGFBR3, TCAF2, JAK2	4.0762e-07
GOTERM_BP_FAT	GO:0016477~cell migration	52	NRP1, IL6ST, WASF2, CSPG4, PAWR, CXCL12, MMP2, KANK1, RRAS, PLCB1, ADAM9, EGFR, PTPRK, SAA3, ARPIN, SLC9A3R1, PALLD, MMP14, MYADM, THY1, RIPK3, PDGFRA, HSPB1, PDGFRB, FOXC1, TMSB4X, COL1A1, CYP1B1, CXCL5, CD248, COL3A1, ARHGAP35, EPHB3, TPM1, VCAM1, IGF1R, PFN2, FAT1, THBS1, DCLK1, FN1, ARHGDIB, COL18A1, IL1RN, ANXA1, FOXP1, COL5A1, LRP1, PKP2, TGFBR3, TCAF2, JAK2	4.97082e-07
GOTERM_BP_FAT	GO:0030336~negative regulation of cell migration	18	PTPRK, CYP1B1, COL3A1, IL1RN, ARPIN, SLC9A3R1, TPM1, CXCL12, KANK1, THY1, PFN2, LRP1, PKP2, TGFBR3, RRAS, THBS1, PLCB1, ARHGDIB	0.000377059
GOTERM_BP_FAT	GO:2000146~negative regulation of cell motility	18	PTPRK, CYP1B1, COL3A1, IL1RN, ARPIN, SLC9A3R1, TPM1, CXCL12, KANK1, THY1, PFN2, LRP1, PKP2, TGFBR3, RRAS, THBS1, PLCB1, ARHGDIB	0.000786463
GOTERM_BP_FAT	GO:0051271~negative regulation of cellular component movement	19	PTPRK, CYP1B1, NRP1, COL3A1, IL1RN, ARPIN, SLC9A3R1, CXCL12, TPM1, KANK1, THY1, PFN2, LRP1, PKP2, TGFBR3, RRAS, THBS1, PLCB1, ARHGDIB	0.000938792
GOTERM_BP_FAT	GO:0040013~negative regulation of locomotion	19	PTPRK, CYP1B1, NRP1, COL3A1, IL1RN, ARPIN, SLC9A3R1, CXCL12, TPM1, KANK1, THY1, PFN2, LRP1, PKP2, TGFBR3, RRAS, THBS1, PLCB1, ARHGDIB	0.00104651
GOTERM_BP_FAT	GO:0051272~positive regulation of cellular component movement	23	COL18A1, EGFR, CYP1B1, NRP1, CXCL5, IL6ST, PAWR, MMP14, CXCL12, MMP2, MYADM, FOXP1, IGF1R, PDGFRA, TCAF2, PDGFRB, HSPB1, JAK2, TMSB4X, COL1A1, THBS1, ADAM9, FN1	0.0212727
GOTERM_BP_FAT	GO:0040017~positive regulation of locomotion	23	COL18A1, EGFR, CYP1B1, NRP1, CXCL5, IL6ST, PAWR, MMP14, CXCL12, MMP2, MYADM, FOXP1, IGF1R, PDGFRA, TCAF2, PDGFRB, HSPB1, JAK2, TMSB4X, COL1A1, THBS1, ADAM9, FN1	0.0228951
GOTERM_BP_FAT	GO:0030335~positive regulation of cell migration	22	EGFR, COL18A1, CYP1B1, CXCL5, IL6ST, PAWR, MMP14, CXCL12, MMP2, MYADM, FOXP1, IGF1R, PDGFRA, TCAF2, PDGFRB, HSPB1, JAK2, TMSB4X, COL1A1, THBS1, ADAM9, FN1	0.0290664
GOTERM_BP_FAT	GO:2000147~positive regulation of cell motility	22	EGFR, COL18A1, CYP1B1, CXCL5, IL6ST, PAWR, MMP14, CXCL12, MMP2, MYADM, FOXP1, IGF1R, PDGFRA, TCAF2, PDGFRB, HSPB1, JAK2, TMSB4X, COL1A1, THBS1, ADAM9, FN1	0.0473804
Annotation Cluster 2	Enrichment Score: 7.709268008048346
Category	Term	Count	Genes	FDR
GOTERM_BP_FAT	GO:0072359~circulatory system development	53	NRP1, LMO4, PDLIM5, WASF2, PRRX1, CSPG4, ANPEP, PRRX2, CXCL12, MMP2, CASP3, PTGIS, RRAS, LOX, EGFR, ACADM, MICAL2, NEXN, MMP14, THY1, CPE, PDGFRA, COL1A2, HSPB1, SGCD, PDGFRB, FOXC1, VCAN, COL1A1, XDH, CYP1B1, C3, COL3A1, COL2A1, BICC1, EPHB3, TPM1, VCAM1, OXCT1, PLCD1, NFATC4, THBS1, FN1, COL18A1, FBN1, FOXP1, COL5A1, SOD2, COL14A1, LRP1, PKP2, TGFBR3, ANTXR1	1.71795e-09
GOTERM_BP_FAT	GO:0072358~cardiovascular system development	53	NRP1, LMO4, PDLIM5, WASF2, PRRX1, CSPG4, ANPEP, PRRX2, CXCL12, MMP2, CASP3, PTGIS, RRAS, LOX, EGFR, ACADM, MICAL2, NEXN, MMP14, THY1, CPE, PDGFRA, COL1A2, HSPB1, SGCD, PDGFRB, FOXC1, VCAN, COL1A1, XDH, CYP1B1, C3, COL3A1, COL2A1, BICC1, EPHB3, TPM1, VCAM1, OXCT1, PLCD1, NFATC4, THBS1, FN1, COL18A1, FBN1, FOXP1, COL5A1, SOD2, COL14A1, LRP1, PKP2, TGFBR3, ANTXR1	1.71795e-09
GOTERM_BP_FAT	GO:0001568~blood vessel development	33	XDH, NRP1, CYP1B1, C3, WASF2, COL3A1, PRRX1, CSPG4, ANPEP, PRRX2, EPHB3, CXCL12, MMP2, PTGIS, RRAS, NFATC4, PLCD1, LOX, THBS1, FN1, COL18A1, MMP14, COL5A1, THY1, LRP1, PDGFRA, COL1A2, PDGFRB, TGFBR3, HSPB1, FOXC1, ANTXR1, COL1A1	4.03998e-05
GOTERM_BP_FAT	GO:0001944~vasculature development	33	XDH, NRP1, CYP1B1, C3, WASF2, COL3A1, PRRX1, CSPG4, ANPEP, PRRX2, EPHB3, CXCL12, MMP2, PTGIS, RRAS, NFATC4, PLCD1, LOX, THBS1, FN1, COL18A1, MMP14, COL5A1, THY1, LRP1, PDGFRA, COL1A2, PDGFRB, TGFBR3, HSPB1, FOXC1, ANTXR1, COL1A1	0.000143189
GOTERM_BP_FAT	GO:0048514~blood vessel morphogenesis	28	XDH, CYP1B1, NRP1, C3, WASF2, COL3A1, PRRX1, CSPG4, ANPEP, PRRX2, EPHB3, MMP2, CXCL12, PTGIS, RRAS, NFATC4, PLCD1, THBS1, FN1, COL18A1, MMP14, THY1, LRP1, PDGFRA, PDGFRB, TGFBR3, HSPB1, FOXC1	0.000533402
GOTERM_BP_FAT	GO:0001525~angiogenesis	22	COL18A1, CYP1B1, NRP1, C3, WASF2, CSPG4, ANPEP, EPHB3, MMP14, CXCL12, MMP2, THY1, PTGIS, PDGFRA, PDGFRB, HSPB1, RRAS, NFATC4, FOXC1, PLCD1, THBS1, FN1	0.027047
GOTERM_BP_FAT	GO:0048646~anatomical structure formation involved in morphogenesis	39	ENAH, NRP1, CYP1B1, C3, LMO4, WASF2, CSPG4, ARHGAP35, ANPEP, COL2A1, EPHB3, CXCL12, MMP2, TPM1, PTGIS, TGM2, COL12A1, RRAS, PLCD1, NFATC4, LMOD1, THBS1, EHD2, GPC1, ADAM9, FN1, COL18A1, MMP14, COL5A1, FOXP1, VASP, THY1, PDGFRA, PDGFRB, ABCC4, TGFBR3, HSPB1, FOXC1, COL1A1	0.374093
Annotation Cluster 3	Enrichment Score: 7.049041879998264
Category	Term	Count	Genes	FDR
GOTERM_BP_FAT	GO:0030199~collagen fibril organization	10	COL14A1, CYP1B1, COL3A1, COL1A2, FOXC1, COL2A1, COL1A1, LOX, SERPINH1, COL5A1	2.45467e-05
GOTERM_BP_FAT	GO:0030198~extracellular matrix organization	18	COL18A1, CYP1B1, LTBP2, COL3A1, COL2A1, NID1, SERPINH1, COL5A1, APLP2, COL14A1, PDGFRA, RIPK3, COL1A2, FOXC1, LOX, COL1A1, ANTXR1, FN1	0.000427782
GOTERM_BP_FAT	GO:0043062~extracellular structure organization	18	COL18A1, CYP1B1, LTBP2, COL3A1, COL2A1, NID1, SERPINH1, COL5A1, APLP2, COL14A1, PDGFRA, RIPK3, COL1A2, FOXC1, LOX, COL1A1, ANTXR1, FN1	0.000455885
Annotation Cluster 4	Enrichment Score: 5.585577865554147
Category	Term	Count	Genes	FDR
GOTERM_BP_FAT	GO:0071822~protein complex subunit organization	56	LMO4, IMPACT, ATL3, KANK1, DSTN, VPS4A, LMOD1, CAT, LOX, FAS, KIF14, ACADM, NOL3, PCBD2, CRYAB, MICAL2, MGP, ARPIN, PALLD, MYADM, VASP, DHRS4, COL1A2, RIPK3, TMSB4X, FOXC1, COL1A1, OAT, CYP1B1, CAMK2G, COL3A1, COL2A1, TPM1, SERPINH1, ANXA6, IGF1R, PFN2, CBR2, TGM2, CDA, FN1, MAP1A, AK3, S100A10, BCS1L, CPT1A, COL5A1, SOD2, LCN2, P2RX4, COL14A1, TGFBR3, KCTD15, DCXR, MGST1, KCTD12	2.37134e-06
GOTERM_BP_FAT	GO:0051259~protein oligomerization	29	CAMK2G, ATL3, ANXA6, IGF1R, CBR2, TGM2, CDA, FAS, CAT, ACADM, NOL3, PCBD2, CRYAB, AK3, S100A10, CPT1A, VASP, SOD2, LCN2, P2RX4, DHRS4, RIPK3, COL1A2, KCTD15, COL1A1, OAT, DCXR, MGST1, KCTD12	7.93628e-05
GOTERM_BP_FAT	GO:0051260~protein homooligomerization	20	ACADM, PCBD2, CRYAB, ATL3, AK3, CPT1A, VASP, SOD2, ANXA6, LCN2, P2RX4, TGM2, RIPK3, CDA, KCTD15, CAT, FAS, DCXR, MGST1, KCTD12	0.00099731
GOTERM_BP_FAT	GO:0022607~cellular component assembly	69	IMPACT, LMO4, ATG101, WASF2, ATL3, PAWR, KANK1, ANK3, VPS4A, LMOD1, CAT, LOX, FAS, GPC1, KIF14, PTPRK, ACADM, NOL3, PCBD2, CRYAB, MGP, ARPIN, SLC9A3R1, MMP14, PALLD, MYADM, FARP1, VASP, THY1, DHRS4, COL1A2, RIPK3, PDGFRA, PDGFRB, TMSB4X, COL1A1, OAT, CALD1, CAMK2G, ARHGAP35, EPHB3, TPM1, ANXA6, IGF1R, SORBS3, PFN2, CBR2, SORBS1, TGM2, CDA, SYNPO, FN1, AK3, S100A10, BCS1L, CPT1A, FOXP1, SOD2, LCN2…	0.00731517
GOTERM_BP_FAT	GO:0006461~protein complex assembly	44	LMO4, CAMK2G, IMPACT, ATL3, TPM1, KANK1, ANXA6, IGF1R, PFN2, CBR2, TGM2, CDA, LMOD1, CAT, FAS, FN1, KIF14, ACADM, NOL3, PCBD2, CRYAB, AK3, S100A10, MGP, BCS1L, ARPIN, PALLD, MYADM, VASP, CPT1A, SOD2, LCN2, P2RX4, DHRS4, COL1A2, RIPK3, TGFBR3, TMSB4X, KCTD15, COL1A1, OAT, DCXR, MGST1, KCTD12	0.00929731
GOTERM_BP_FAT	GO:0070271~protein complex biogenesis	44	LMO4, CAMK2G, IMPACT, ATL3, TPM1, KANK1, ANXA6, IGF1R, PFN2, CBR2, TGM2, CDA, LMOD1, CAT, FAS, FN1, KIF14, ACADM, NOL3, PCBD2, CRYAB, AK3, S100A10, MGP, BCS1L, ARPIN, PALLD, MYADM, VASP, CPT1A, SOD2, LCN2, P2RX4, DHRS4, COL1A2, RIPK3, TGFBR3, TMSB4X, KCTD15, COL1A1, OAT, DCXR, MGST1, KCTD12	0.00943068
GOTERM_BP_FAT	GO:0044085~cellular component biogenesis	71	IMPACT, PDLIM5, LMO4, ATG101, WASF2, ATL3, PAWR, KANK1, SERPINE2, ANK3, VPS4A, LMOD1, CAT, LOX, FAS, GPC1, KIF14, PTPRK, ACADM, NOL3, PCBD2, CRYAB, MGP, ARPIN, SLC9A3R1, MMP14, PALLD, MYADM, FARP1, VASP, THY1, DHRS4, COL1A2, RIPK3, PDGFRA, PDGFRB, TMSB4X, COL1A1, OAT, CALD1, CAMK2G, ARHGAP35, EPHB3, TPM1, ANXA6, IGF1R, SORBS3, PFN2, CBR2, SORBS1, TGM2, CDA, SYNPO, FN1, AK3, S100A10, BCS1L, CPT1A,…	0.0459195
GOTERM_BP_FAT	GO:0043933~macromolecular complex subunit organization	59	LMO4, IMPACT, ATL3, KANK1, DSTN, VPS4A, LMOD1, CAT, LOX, FAS, KIF14, ACADM, NOL3, PCBD2, CRYAB, MICAL2, MGP, ARPIN, PALLD, MYADM, VASP, EYA4, DHRS4, COL1A2, RIPK3, TMSB4X, FOXC1, COL1A1, OAT, CYP1B1, CAMK2G, COL3A1, COL2A1, TPM1, SERPINH1, ANXA6, IGF1R, PFN2, CBR2, TGM2, CDA, FN1, CHD3, MAP1A, AK3, S100A10, BCS1L, CPT1A, COL5A1, SOD2, LCN2, P2RX4, COL14A1, TGFBR3, JAK2, KCTD15, DCXR, MGST1, KCTD12	0.394119
GOTERM_BP_FAT	GO:0065003~macromolecular complex assembly	44	LMO4, CAMK2G, IMPACT, ATL3, TPM1, KANK1, ANXA6, IGF1R, PFN2, CBR2, TGM2, CDA, LMOD1, CAT, FAS, FN1, KIF14, ACADM, NOL3, PCBD2, CRYAB, AK3, S100A10, MGP, BCS1L, ARPIN, PALLD, MYADM, VASP, CPT1A, SOD2, LCN2, P2RX4, DHRS4, COL1A2, RIPK3, TGFBR3, TMSB4X, KCTD15, COL1A1, OAT, DCXR, MGST1, KCTD12	0.742529
Annotation Cluster 5	Enrichment Score: 5.439314499472814
Category	Term	Count	Genes	FDR
GOTERM_BP_FAT	GO:0097190~apoptotic signaling pathway	31	CYP1B1, NRP1, COL2A1, PAWR, ITM2B, CXCL12, ITM2C, ANXA6, CASP3, PTGIS, BAG3, NFATC4, FAS, DAP, THBS1, PHLDA3, CRIP1, CEBPB, NOL3, GAS1, SLC9A3R1, SOD2, PLAUR, LCN2, P2RX4, EYA4, RIPK3, HSPB1, JAK2, URI1, IFI204	5.67092e-05
GOTERM_BP_FAT	GO:0006915~apoptotic process	59	NRP1, 1600014C10RIK, PAWR, CXCL12, MMP2, CASP3, PTGIS, BAG3, DAP, FAS, CAT, NQO1, NQO2, EGFR, KIF14, NOL3, CRYAB, SLC9A3R1, PLAUR, EYA4, SERPINB9, RIPK3, HSPB1, PDGFRB, RIPK2, FOXC1, XDH, CYP1B1, CD248, CRLF1, COL2A1, ITM2B, ITM2C, ANXA6, PRUNE2, IGF1R, TGM2, GLO1, NFATC4, THBS1, PHLDA3, FN1, COL18A1, CRIP1, CEBPB, IL1RN, ANXA1, GAS1, FOXP1, SOD2, LCN2, P2RX4, PLA2G4A, LRP1, ALDH2, TGFBR3, JAK2, …	0.000435198
GOTERM_BP_FAT	GO:0012501~programmed cell death	61	NRP1, 1600014C10RIK, PAWR, CXCL12, MMP2, CASP3, PTGIS, BAG3, DAP, FAS, CAT, NQO1, NQO2, EGFR, KIF14, NOL3, CRYAB, SLC9A3R1, PLAUR, EYA4, CTSL, SERPINB9, RIPK3, HSPB1, PDGFRB, RIPK2, FOXC1, XDH, CYP1B1, CD248, CRLF1, COL2A1, ITM2B, ITM2C, ANXA6, PRUNE2, IGF1R, TGM2, GLO1, NFATC4, THBS1, PHLDA3, GLRX, FN1, COL18A1, CRIP1, CEBPB, IL1RN, ANXA1, GAS1, FOXP1, SOD2, LCN2, P2RX4, PLA2G4A, LRP1, ALDH2, TG…	0.000444629
GOTERM_BP_FAT	GO:0043067~regulation of programmed cell death	52	NRP1, PAWR, CXCL12, MMP2, CASP3, PTGIS, BAG3, DAP, FAS, CAT, NQO1, NQO2, KIF14, EGFR, NOL3, CRYAB, SLC9A3R1, PLAUR, SERPINB9, EYA4, RIPK3, HSPB1, PDGFRB, RIPK2, FOXC1, XDH, CYP1B1, CD248, CRLF1, COL2A1, ITM2C, IGF1R, TGM2, NFATC4, GLO1, THBS1, PHLDA3, FN1, GLRX, COL18A1, CEBPB, IL1RN, ANXA1, GAS1, FOXP1, SOD2, PLA2G4A, LRP1, ALDH2, TGFBR3, JAK2, URI1	0.000755207
GOTERM_BP_FAT	GO:0042981~regulation of apoptotic process	51	NRP1, PAWR, CXCL12, MMP2, CASP3, PTGIS, BAG3, DAP, FAS, CAT, NQO1, NQO2, KIF14, EGFR, NOL3, CRYAB, SLC9A3R1, PLAUR, SERPINB9, EYA4, RIPK3, HSPB1, PDGFRB, RIPK2, FOXC1, XDH, CYP1B1, CD248, CRLF1, COL2A1, ITM2C, IGF1R, TGM2, NFATC4, GLO1, THBS1, PHLDA3, FN1, COL18A1, CEBPB, IL1RN, ANXA1, GAS1, FOXP1, SOD2, PLA2G4A, LRP1, ALDH2, TGFBR3, JAK2, URI1	0.00129489
GOTERM_BP_FAT	GO:0008219~cell death	62	NRP1, IMPACT, 1600014C10RIK, PAWR, CXCL12, MMP2, CASP3, PTGIS, BAG3, DAP, FAS, CAT, NQO1, NQO2, EGFR, KIF14, NOL3, CRYAB, SLC9A3R1, PLAUR, EYA4, CTSL, SERPINB9, RIPK3, HSPB1, PDGFRB, RIPK2, FOXC1, XDH, CYP1B1, CD248, CRLF1, COL2A1, ITM2B, ITM2C, ANXA6, PRUNE2, IGF1R, TGM2, GLO1, NFATC4, THBS1, PHLDA3, GLRX, FN1, COL18A1, CRIP1, CEBPB, IL1RN, ANXA1, GAS1, FOXP1, SOD2, LCN2, P2RX4, PLA2G4A, LRP1, A…	0.00205343
GOTERM_BP_FAT	GO:0010941~regulation of cell death	53	NRP1, IMPACT, PAWR, CXCL12, MMP2, CASP3, PTGIS, BAG3, DAP, FAS, CAT, NQO1, NQO2, KIF14, EGFR, NOL3, CRYAB, SLC9A3R1, PLAUR, SERPINB9, EYA4, RIPK3, HSPB1, PDGFRB, RIPK2, FOXC1, XDH, CYP1B1, CD248, CRLF1, COL2A1, ITM2C, IGF1R, TGM2, NFATC4, GLO1, THBS1, PHLDA3, GLRX, FN1, COL18A1, CEBPB, IL1RN, ANXA1, GAS1, FOXP1, SOD2, PLA2G4A, LRP1, ALDH2, TGFBR3, JAK2, URI1	0.0033296
GOTERM_BP_FAT	GO:0043065~positive regulation of apoptotic process	25	XDH, CYP1B1, CD248, PAWR, ITM2C, MMP2, CASP3, PTGIS, TGM2, NFATC4, FAS, DAP, NQO1, THBS1, PHLDA3, NQO2, COL18A1, ANXA1, SLC9A3R1, PLAUR, PLA2G4A, RIPK3, RIPK2, PDGFRB, JAK2	0.0551608
GOTERM_BP_FAT	GO:0043068~positive regulation of programmed cell death	25	XDH, CYP1B1, CD248, PAWR, ITM2C, MMP2, CASP3, PTGIS, TGM2, NFATC4, FAS, DAP, NQO1, THBS1, PHLDA3, NQO2, COL18A1, ANXA1, SLC9A3R1, PLAUR, PLA2G4A, RIPK3, RIPK2, PDGFRB, JAK2	0.0632202
GOTERM_BP_FAT	GO:0043069~negative regulation of programmed cell death	34	NRP1, CRLF1, COL2A1, CXCL12, IGF1R, CASP3, BAG3, GLO1, FAS, CAT, THBS1, NQO1, GLRX, FN1, EGFR, KIF14, CEBPB, NOL3, CRYAB, IL1RN, GAS1, FOXP1, SOD2, PLAUR, SERPINB9, EYA4, LRP1, ALDH2, PDGFRB, TGFBR3, HSPB1, FOXC1, JAK2, URI1	0.0722489
GOTERM_BP_FAT	GO:0043066~negative regulation of apoptotic process	33	NRP1, CRLF1, COL2A1, CXCL12, IGF1R, CASP3, BAG3, GLO1, FAS, CAT, THBS1, NQO1, FN1, EGFR, KIF14, CEBPB, NOL3, CRYAB, IL1RN, GAS1, FOXP1, SOD2, PLAUR, SERPINB9, EYA4, LRP1, ALDH2, PDGFRB, TGFBR3, HSPB1, FOXC1, JAK2, URI1	0.126458
GOTERM_BP_FAT	GO:0010942~positive regulation of cell death	25	XDH, CYP1B1, CD248, PAWR, ITM2C, MMP2, CASP3, PTGIS, TGM2, NFATC4, FAS, DAP, NQO1, THBS1, PHLDA3, NQO2, COL18A1, ANXA1, SLC9A3R1, PLAUR, PLA2G4A, RIPK3, RIPK2, PDGFRB, JAK2	0.17012
GOTERM_BP_FAT	GO:0060548~negative regulation of cell death	35	NRP1, IMPACT, CRLF1, COL2A1, CXCL12, IGF1R, CASP3, BAG3, GLO1, FAS, CAT, THBS1, NQO1, GLRX, FN1, EGFR, KIF14, CEBPB, NOL3, CRYAB, IL1RN, GAS1, FOXP1, SOD2, PLAUR, SERPINB9, EYA4, LRP1, ALDH2, PDGFRB, TGFBR3, HSPB1, FOXC1, JAK2, URI1	0.187286
Annotation Cluster 6	Enrichment Score: 5.251561346747239
Category	Term	Count	Genes	FDR
GOTERM_BP_FAT	GO:0009966~regulation of signal transduction	77	NRP1, IL6ST, PRRX1, CSPG4, PRRX2, PAWR, CXCL12, KANK1, ATP2B4, PTGIS, SERPINE2, ARHGEF40, RRAS, CAT, FAS, PLCB1, GPC1, ADAM9, NQO2, EGFR, PID1, KIF14, NOL3, SLC9A3R1, MMP14, MYADM, FARP1, PLAUR, THY1, EYA4, RBPMS, CD81, RIPK3, PDGFRA, ABAT, RIPK2, HSPB1, PDGFRB, CHSY1, COL1A1, TGFB1I1, XDH, GLG1, CYP1B1, CXCL5, C3, COL3A1, CRLF1, COL2A1, ARHGAP35, BICC1, TIMP2, ITM2C, APLP2, IGF1R, SORBS3, TGM2, …	3.73117e-05
GOTERM_BP_FAT	GO:0023051~regulation of signaling	84	NRP1, IL6ST, PTGS1, PRRX1, CSPG4, LMO7, PAWR, PRRX2, CXCL12, KANK1, ATP2B4, PTGIS, SERPINE2, RRAS, ARHGEF40, CAT, FAS, PLCB1, GPC1, ADAM9, NQO2, EGFR, PID1, KIF14, NOL3, SLC9A3R1, MMP14, MYADM, FARP1, PLAUR, THY1, EYA4, RBPMS, CD81, RIPK3, PDGFRA, ABAT, RIPK2, HSPB1, PDGFRB, CHSY1, COL1A1, TGFB1I1, MVP, XDH, GLG1, CYP1B1, CXCL5, C3, COL3A1, CRLF1, COL2A1, ARHGAP35, BICC1, TIMP2, ITM2C, APLP2, IGF…	4.22501e-05
GOTERM_BP_FAT	GO:0010646~regulation of cell communication	83	NRP1, IL6ST, PTGS1, PRRX1, CSPG4, PAWR, PRRX2, CXCL12, KANK1, ATP2B4, PTGIS, SERPINE2, ANK3, RRAS, ARHGEF40, CAT, FAS, PLCB1, GPC1, ADAM9, NQO2, EGFR, PID1, KIF14, NOL3, SLC9A3R1, MMP14, MYADM, FARP1, PLAUR, THY1, EYA4, RBPMS, CD81, RIPK3, PDGFRA, ABAT, RIPK2, HSPB1, PDGFRB, CHSY1, COL1A1, TGFB1I1, XDH, GLG1, CYP1B1, CXCL5, C3, COL3A1, CRLF1, COL2A1, ARHGAP35, BICC1, TIMP2, ITM2C, APLP2, IGF1R, S…	6.36438e-05
GOTERM_BP_FAT	GO:0009968~negative regulation of signal transduction	36	XDH, GLG1, NRP1, ARHGAP35, COL2A1, PAWR, BICC1, TIMP2, CXCL12, KANK1, IGF1R, ATP2B4, SERPINE2, NFATC4, THBS1, GPC1, PHLDA3, GLRX, PID1, NOL3, IL1RN, FBN1, GAS1, SLC9A3R1, MMP14, MYADM, FOXP1, THY1, SOD2, PLAUR, EYA4, LRP1, TGFBR3, HSPB1, TGFB1I1, URI1	0.0579165
GOTERM_BP_FAT	GO:0048585~negative regulation of response to stimulus	43	XDH, GLG1, NRP1, COL3A1, ARHGAP35, COL2A1, BICC1, PAWR, TIMP2, CXCL12, KANK1, IGF1R, PTGIS, ATP2B4, SERPINE2, NFATC4, THBS1, PHLDA3, GPC1, GLRX, PID1, NOL3, IL1RN, FBN1, ANXA1, GAS1, SLC9A3R1, MMP14, MYADM, FOXP1, THY1, PLAUR, SOD2, SERPINB9, EYA4, LRP1, CHID1, PDGFRA, ABAT, TGFBR3, HSPB1, TGFB1I1, URI1	0.0788795
GOTERM_BP_FAT	GO:0023057~negative regulation of signaling	38	XDH, GLG1, NRP1, PTGS1, ARHGAP35, COL2A1, BICC1, PAWR, TIMP2, CXCL12, KANK1, IGF1R, ATP2B4, SERPINE2, NFATC4, THBS1, GPC1, PHLDA3, GLRX, PID1, NOL3, IL1RN, FBN1, GAS1, SLC9A3R1, MMP14, MYADM, FOXP1, THY1, SOD2, PLAUR, EYA4, LRP1, TGFBR3, HSPB1, TGFB1I1, URI1, MVP	0.152653
GOTERM_BP_FAT	GO:0010648~negative regulation of cell communication	37	XDH, GLG1, NRP1, PTGS1, ARHGAP35, COL2A1, PAWR, BICC1, TIMP2, CXCL12, KANK1, IGF1R, ATP2B4, SERPINE2, NFATC4, THBS1, GPC1, PHLDA3, GLRX, PID1, NOL3, IL1RN, FBN1, GAS1, SLC9A3R1, MMP14, MYADM, FOXP1, THY1, SOD2, PLAUR, EYA4, LRP1, TGFBR3, HSPB1, TGFB1I1, URI1	0.310945
GOTERM_BP_FAT	GO:1902532~negative regulation of intracellular signal transduction	17	XDH, NOL3, ARHGAP35, TIMP2, SLC9A3R1, MYADM, CXCL12, KANK1, SOD2, PLAUR, IGF1R, ATP2B4, SERPINE2, HSPB1, THBS1, URI1, PHLDA3	6.91679
Annotation Cluster 7	Enrichment Score: 4.9699681667140325
Category	Term	Count	Genes	FDR
GOTERM_BP_FAT	GO:0042127~regulation of cell proliferation	54	OSMR, IL6ST, PTGS1, PRRX1, PRRX2, PAWR, CXCL12, MMP2, CASP3, SERPINE2, FAS, NQO2, KIF14, PID1, EGFR, PTPRK, SLC9A3R1, CTSL, CD81, RIPK3, PDGFRA, PDGFRB, RIPK2, XDH, CYP1B1, CXCL5, LRRC32, CD248, CRLF1, TIMP2, TPM1, FTH1, VCAM1, IGF1R, TGM2, PLCD1, CNN1, THBS1, FN1, TES, COL18A1, CEBPB, ANXA1, GAS1, MUSTN1, FOXP1, SOD2, PLA2G4A, PKP2, FABP4, ABCC4, TGFBR3, PBX1, JAK2	0.00219291
GOTERM_BP_FAT	GO:0008283~cell proliferation	57	OSMR, IL6ST, PRRX1, CSPG4, PRRX2, PAWR, CXCL12, MMP2, CASP3, SERPINE2, NQO2, EGFR, KIF14, PID1, PTPRK, NOL3, SLC9A3R1, MMP14, CTSL, CD81, RIPK3, PDGFRA, PDGFRB, RIPK2, FOXC1, MVP, XDH, CYP1B1, LRRC32, CD248, CRLF1, TIMP2, TPM1, FTH1, VCAM1, ANXA7, IGF1R, TGM2, CNN1, THBS1, FN1, TES, COL18A1, CEBPB, ANXA1, GAS1, MUSTN1, FOXP1, SOD2, PLA2G4A, LRP1, PKP2, FABP4, ABCC4, TGFBR3, PBX1, JAK2	0.0111737
GOTERM_BP_FAT	GO:0008284~positive regulation of cell proliferation	32	IL6ST, OSMR, CD248, CRLF1, PRRX1, PRRX2, CXCL12, MMP2, VCAM1, IGF1R, TGM2, THBS1, NQO2, FN1, EGFR, COL18A1, KIF14, PID1, ANXA1, MUSTN1, GAS1, FOXP1, PLA2G4A, CD81, PDGFRA, FABP4, PDGFRB, ABCC4, TGFBR3, RIPK2, JAK2, PBX1	0.336788
Annotation Cluster 8	Enrichment Score: 4.824081267294947
Category	Term	Count	Genes	FDR
GOTERM_BP_FAT	GO:0045595~regulation of cell differentiation	57	NRP1, IL6ST, LMO4, PDLIM5, IMPACT, PRRX1, CSPG4, PAWR, CXCL12, KANK1, SERPINE2, FAS, PLCB1, GPC1, EGFR, KIF14, MMP14, MYADM, THY1, PDGFRA, HSPB1, RIPK2, FOXC1, TMSB4X, COL1A1, TGFB1I1, XDH, GLG1, TRIOBP, RBP1, CXCL5, COL3A1, ARHGAP35, EPHB3, TIMP2, ITM2C, IGF1R, MEIS2, NFATC4, EHD2, FN1, CEBPB, FBN1, ANXA1, S100A10, MUSTN1, FOXP1, COL5A1, SOD2, LRP1, COL14A1, PKP2, TGFBR3, PBX1, JAK2, TMEM176B, I…	0.00338231
GOTERM_BP_FAT	GO:2000026~regulation of multicellular organismal development	58	NRP1, IL6ST, PDLIM5, IMPACT, PRRX1, CSPG4, PAWR, CXCL12, KANK1, PTGIS, SERPINE2, RRAS, FAS, PLCB1, GPC1, EGFR, KIF14, MGP, MMP14, MYADM, THY1, CPE, PDGFRA, HSPB1, PDGFRB, RIPK2, FOXC1, COL1A1, TGFB1I1, XDH, GLG1, CYP1B1, CXCL5, RBP1, C3, COL3A1, ARHGAP35, TIMP2, EPHB3, ITM2C, IGF1R, MEIS2, NFATC4, THBS1, ARHGDIB, FN1, CEBPB, FBN1, IL1RN, ANXA1, MUSTN1, FOXP1, COL5A1, LRP1, COL14A1, TGFBR3, PBX1, …	0.00660552
GOTERM_BP_FAT	GO:0060284~regulation of cell development	32	TRIOBP, NRP1, CXCL5, IL6ST, PDLIM5, IMPACT, COL3A1, PRRX1, CSPG4, ARHGAP35, PAWR, TIMP2, EPHB3, CXCL12, ITM2C, KANK1, IGF1R, SERPINE2, NFATC4, FN1, KIF14, FBN1, S100A10, MYADM, THY1, COL14A1, LRP1, TGFBR3, HSPB1, PBX1, TGFB1I1, COL1A1	1.00863
Annotation Cluster 9	Enrichment Score: 4.367361941929066
Category	Term	Count	Genes	FDR
GOTERM_BP_FAT	GO:0035924~cellular response to vascular endothelial growth factor stimulus	9	XDH, VCAM1, NRP1, PDGFRA, PDGFRB, HSPB1, FOXC1, MAPKAPK2, GAS1	0.000348413
GOTERM_BP_FAT	GO:0038084~vascular endothelial growth factor signaling pathway	6	XDH, NRP1, PDGFRA, PDGFRB, HSPB1, FOXC1	0.0205787
GOTERM_BP_FAT	GO:0048010~vascular endothelial growth factor receptor signaling pathway	4	NRP1, HSPB1, FOXC1, MAPKAPK2	53.0215
Annotation Cluster 10	Enrichment Score: 4.135551880116539
Category	Term	Count	Genes	FDR
GOTERM_BP_FAT	GO:0048659~smooth muscle cell proliferation	13	EGFR, NOL3, TPM1, MMP2, FOXP1, IGF1R, TGM2, PDGFRB, ABCC4, JAK2, CNN1, THBS1, NQO2	0.00538326
GOTERM_BP_FAT	GO:0033002~muscle cell proliferation	15	EGFR, NOL3, TPM1, MMP2, FOXP1, IGF1R, TGM2, PDGFRB, TGFBR3, ABCC4, JAK2, FOXC1, CNN1, THBS1, NQO2	0.00657794
GOTERM_BP_FAT	GO:0048661~positive regulation of smooth muscle cell proliferation	10	EGFR, IGF1R, TGM2, PDGFRB, ABCC4, JAK2, THBS1, MMP2, FOXP1, NQO2	0.0370819
GOTERM_BP_FAT	GO:0048660~regulation of smooth muscle cell proliferation	12	EGFR, IGF1R, TGM2, PDGFRB, ABCC4, JAK2, CNN1, THBS1, MMP2, TPM1, FOXP1, NQO2	0.0448131
GOTERM_BP_FAT	GO:1990874~vascular smooth muscle cell proliferation	5	JAK2, CNN1, MMP2, TPM1, NQO2	0.634082
GOTERM_BP_FAT	GO:1904705~regulation of vascular smooth muscle cell proliferation	5	JAK2, CNN1, MMP2, TPM1, NQO2	0.634082
GOTERM_BP_FAT	GO:1904707~positive regulation of vascular smooth muscle cell proliferation	3	JAK2, MMP2, NQO2	33.4071
Annotation Cluster 11	Enrichment Score: 3.9458197772594943
Category	Term	Count	Genes	FDR
GOTERM_BP_FAT	GO:0006979~response to oxidative stress	33	CYP1B1, IMPACT, CAMK2G, PTGS1, 1600014C10RIK, PAWR, MMP2, TPM1, CASP3, IDH1, GPX8, GPX7, CAT, THBS1, NQO1, ADAM9, GLRX, EGFR, PTPRK, GNAO1, NOL3, CRYAB, ANXA1, MMP14, SOD2, LCN2, RBPMS, PDGFRA, PDGFRB, HSPB1, JAK2, COL1A1, MGST1	6.31373e-10
GOTERM_BP_FAT	GO:0000302~response to reactive oxygen species	20	PTPRK, GNAO1, NOL3, CYP1B1, CRYAB, IMPACT, ANXA1, PAWR, TPM1, MMP2, SOD2, LCN2, CASP3, PDGFRA, PDGFRB, CAT, COL1A1, THBS1, ADAM9, GLRX	4.37781e-06
GOTERM_BP_FAT	GO:0042542~response to hydrogen peroxide	16	GNAO1, NOL3, CYP1B1, CRYAB, IMPACT, ANXA1, PAWR, MMP2, SOD2, LCN2, CASP3, PDGFRB, CAT, COL1A1, GLRX, ADAM9	1.01219e-05
GOTERM_BP_FAT	GO:0034614~cellular response to reactive oxygen species	12	LCN2, PTPRK, NOL3, CYP1B1, IMPACT, PDGFRA, ANXA1, PAWR, THBS1, TPM1, SOD2, GLRX	0.0260676
GOTERM_BP_FAT	GO:0034599~cellular response to oxidative stress	15	PTPRK, NOL3, CYP1B1, IMPACT, ANXA1, PAWR, TPM1, SOD2, LCN2, PDGFRA, HSPB1, JAK2, THBS1, MGST1, GLRX	0.0897674
GOTERM_BP_FAT	GO:0036473~cell death in response to oxidative stress	7	NOL3, CYP1B1, HSPB1, JAK2, PAWR, SOD2, GLRX	4.16548
GOTERM_BP_FAT	GO:0070301~cellular response to hydrogen peroxide	7	LCN2, NOL3, CYP1B1, IMPACT, ANXA1, PAWR, GLRX	4.42404
GOTERM_BP_FAT	GO:1903201~regulation of oxidative stress-induced cell death	5	NOL3, HSPB1, PAWR, SOD2, GLRX	35.4062
GOTERM_BP_FAT	GO:1900407~regulation of cellular response to oxidative stress	5	NOL3, HSPB1, PAWR, SOD2, GLRX	48.442
GOTERM_BP_FAT	GO:1902882~regulation of response to oxidative stress	5	NOL3, HSPB1, PAWR, SOD2, GLRX	55.655
GOTERM_BP_FAT	GO:1903205~regulation of hydrogen peroxide-induced cell death	3	NOL3, PAWR, GLRX	81.6729
GOTERM_BP_FAT	GO:0036474~cell death in response to hydrogen peroxide	3	NOL3, PAWR, GLRX	81.6729
GOTERM_BP_FAT	GO:1901031~regulation of response to reactive oxygen species	3	NOL3, PAWR, GLRX	94.0594
Annotation Cluster 12	Enrichment Score: 3.872166241114921
Category	Term	Count	Genes	FDR
GOTERM_BP_FAT	GO:0000904~cell morphogenesis involved in differentiation	33	TRIOBP, ENAH, NRP1, PDLIM5, ARHGAP35, PAWR, EPHB3, CXCL12, KANK1, SLC11A2, IGF1R, ANK3, FAT1, NFATC4, TUBB3, DCLK1, FN1, COL18A1, KIF14, S100A10, GAS1, SLC9A3R1, PALLD, MYADM, FARP1, FOXP1, VASP, THY1, TGFBR3, COL1A1, TGFB1I1, ANTXR1, CDH11	0.00602474
GOTERM_BP_FAT	GO:0022604~regulation of cell morphogenesis	22	TRIOBP, NRP1, PDLIM5, ANXA1, S100A10, ARHGAP35, ARPIN, PAWR, EPHB3, SLC9A3R1, CXCL12, TPM1, MYADM, KANK1, THY1, ANXA7, TGFBR3, NFATC4, SH3D19, COL1A1, TGFB1I1, FN1	1.14956
GOTERM_BP_FAT	GO:0010769~regulation of cell morphogenesis involved in differentiation	16	TRIOBP, NRP1, PDLIM5, S100A10, ARHGAP35, PAWR, EPHB3, MYADM, CXCL12, KANK1, THY1, TGFBR3, NFATC4, COL1A1, TGFB1I1, FN1	2.30703
Annotation Cluster 13	Enrichment Score: 3.528069690933968
Category	Term	Count	Genes	FDR
GOTERM_BP_FAT	GO:0009966~regulation of signal transduction	77	NRP1, IL6ST, PRRX1, CSPG4, PRRX2, PAWR, CXCL12, KANK1, ATP2B4, PTGIS, SERPINE2, ARHGEF40, RRAS, CAT, FAS, PLCB1, GPC1, ADAM9, NQO2, EGFR, PID1, KIF14, NOL3, SLC9A3R1, MMP14, MYADM, FARP1, PLAUR, THY1, EYA4, RBPMS, CD81, RIPK3, PDGFRA, ABAT, RIPK2, HSPB1, PDGFRB, CHSY1, COL1A1, TGFB1I1, XDH, GLG1, CYP1B1, CXCL5, C3, COL3A1, CRLF1, COL2A1, ARHGAP35, BICC1, TIMP2, ITM2C, APLP2, IGF1R, SORBS3, TGM2, …	3.73117e-05
GOTERM_BP_FAT	GO:0023051~regulation of signaling	84	NRP1, IL6ST, PTGS1, PRRX1, CSPG4, LMO7, PAWR, PRRX2, CXCL12, KANK1, ATP2B4, PTGIS, SERPINE2, RRAS, ARHGEF40, CAT, FAS, PLCB1, GPC1, ADAM9, NQO2, EGFR, PID1, KIF14, NOL3, SLC9A3R1, MMP14, MYADM, FARP1, PLAUR, THY1, EYA4, RBPMS, CD81, RIPK3, PDGFRA, ABAT, RIPK2, HSPB1, PDGFRB, CHSY1, COL1A1, TGFB1I1, MVP, XDH, GLG1, CYP1B1, CXCL5, C3, COL3A1, CRLF1, COL2A1, ARHGAP35, BICC1, TIMP2, ITM2C, APLP2, IGF…	4.22501e-05
GOTERM_BP_FAT	GO:0010646~regulation of cell communication	83	NRP1, IL6ST, PTGS1, PRRX1, CSPG4, PAWR, PRRX2, CXCL12, KANK1, ATP2B4, PTGIS, SERPINE2, ANK3, RRAS, ARHGEF40, CAT, FAS, PLCB1, GPC1, ADAM9, NQO2, EGFR, PID1, KIF14, NOL3, SLC9A3R1, MMP14, MYADM, FARP1, PLAUR, THY1, EYA4, RBPMS, CD81, RIPK3, PDGFRA, ABAT, RIPK2, HSPB1, PDGFRB, CHSY1, COL1A1, TGFB1I1, XDH, GLG1, CYP1B1, CXCL5, C3, COL3A1, CRLF1, COL2A1, ARHGAP35, BICC1, TIMP2, ITM2C, APLP2, IGF1R, S…	6.36438e-05
GOTERM_BP_FAT	GO:0007166~cell surface receptor signaling pathway	72	ENAH, NRP1, OSMR, IL6ST, PRRX1, CSPG4, PRRX2, PAWR, CXCL12, KANK1, CASP3, SERPINE2, BAG3, FAS, PLCB1, GPC1, ADAM9, EGFR, PID1, PTPRK, NOL3, SLC9A3R1, MMP14, VASP, PLAUR, THY1, EYA4, RBPMS, CPE, CD81, COL1A2, PDGFRA, ABAT, HSPB1, PDGFRB, RIPK2, CHSY1, FOXC1, COL1A1, TGFB1I1, MVP, XDH, GLG1, CXCL5, COL3A1, COL2A1, ARHGAP35, BICC1, MAPKAPK2, EPHB3, ITM2B, ITM2C, APLP2, IGF1R, ACSL1, SORBS1, NFATC4, …	7.95466e-05
GOTERM_BP_FAT	GO:0048584~positive regulation of response to stimulus	61	ENAH, NRP1, IL6ST, PRRX1, CSPG4, PRRX2, PAWR, CXCL12, MMP2, KANK1, PTGIS, CAT, FAS, PLCB1, ADAM9, NQO2, EGFR, SLC9A3R1, VASP, THY1, PLAUR, EYA4, RBPMS, CD81, RIPK3, PDGFRA, ABAT, PDGFRB, HSPB1, RIPK2, CHSY1, COL1A1, TGFB1I1, XDH, CYP1B1, CXCL5, C3, CRLF1, COL3A1, MAPKAPK2, TIMP2, ITM2C, IGF1R, SORBS3, OXCT1, TGM2, NFATC4, THBS1, GLRX, FN1, IL1RN, ANXA1, GAS1, ACPP, P2RX4, PLA2G4A, FABP4, TGFBR3, …	0.000226295
GOTERM_BP_FAT	GO:0050790~regulation of catalytic activity	56	ATP1B1, GM2A, LXN, LMO4, CSPG4, PAWR, CASP3, ATP2B4, SERPINE2, FAS, DAP, NQO1, ADAM9, EGFR, KIF14, NOL3, CRYAB, SLC9A3R1, FARP1, THY1, PLAUR, SERPINB9, CD81, RIPK3, PDGFRA, HSPB1, PDGFRB, RIPK2, VCAN, MVP, XDH, SNX18, SERPINB1A, ARHGAP35, EPHB3, TIMP2, TPM2, TPM1, APLP2, IGF1R, PFN2, ACSL1, PLCD1, THBS1, TBC1D2B, GNAO1, FBN1, IL1RN, ANXA1, S100A10, SOD2, LRP1, FABP4, JAK2, ANTXR1, URI1	0.000595448
GOTERM_BP_FAT	GO:0065009~regulation of molecular function	67	ATP1B1, GM2A, LXN, LMO4, CSPG4, PAWR, CASP3, ATP2B4, PTGIS, SERPINE2, ANK3, CAT, FAS, DAP, PLCB1, NQO1, ADAM9, EGFR, KIF14, NOL3, CRYAB, SLC9A3R1, FARP1, PLAUR, THY1, SERPINB9, CD81, RIPK3, PDGFRA, RIPK2, HSPB1, PDGFRB, VCAN, MVP, XDH, SNX18, CYP1B1, FHL1, CALD1, SERPINB1A, ARHGAP35, EPHB3, TIMP2, TPM2, TPM1, APLP2, IGF1R, PFN2, ACSL1, PLCD1, NFATC4, THBS1, GLRX, TBC1D2B, GNAO1, FBN1, IL1RN, ANXA…	0.00114095
GOTERM_BP_FAT	GO:0051336~regulation of hydrolase activity	37	XDH, SNX18, ATP1B1, GM2A, LXN, SERPINB1A, ARHGAP35, PAWR, TPM2, EPHB3, TIMP2, TPM1, PFN2, SERPINE2, PLCD1, DAP, FAS, THBS1, TBC1D2B, GNAO1, NOL3, CRYAB, ANXA1, S100A10, FARP1, THY1, PLAUR, SERPINB9, LRP1, PDGFRA, RIPK3, PDGFRB, RIPK2, JAK2, VCAN, ANTXR1, URI1	0.0011449
GOTERM_BP_FAT	GO:0006796~phosphate-containing compound metabolic process	80	LDHB, ATP1B1, NRP1, IL6ST, IMPACT, LMO4, PGD, CSPG4, PAWR, CKB, CASP3, ATP2B4, RRAS, FAS, PLCB1, FAM129A, ADAM9, NQO2, NT5C, EGFR, PID1, KIF14, PTPRK, LPGAT1, CRYAB, SAA3, SLC9A3R1, MYADM, FARP1, PLAUR, THY1, EYA4, RBPMS, PGLS, H6PD, CD81, RIPK3, PDGFRA, RIPK2, HSPB1, PDGFRB, VCAN, MVP, XDH, C3, CAMK2G, CRLF1, MAPKAPK2, EPHB3, TIMP2, APLP2, IGF1R, SORBS3, PFN2, CBR2, ACSL1, FMO1, CDA, IDH1, PLCD1…	0.00206343
GOTERM_BP_FAT	GO:0006793~phosphorus metabolic process	80	LDHB, ATP1B1, NRP1, IL6ST, IMPACT, LMO4, PGD, CSPG4, PAWR, CKB, CASP3, ATP2B4, RRAS, FAS, PLCB1, FAM129A, ADAM9, NQO2, NT5C, EGFR, PID1, KIF14, PTPRK, LPGAT1, CRYAB, SAA3, SLC9A3R1, MYADM, FARP1, PLAUR, THY1, EYA4, RBPMS, PGLS, H6PD, CD81, RIPK3, PDGFRA, RIPK2, HSPB1, PDGFRB, VCAN, MVP, XDH, C3, CAMK2G, CRLF1, MAPKAPK2, EPHB3, TIMP2, APLP2, IGF1R, SORBS3, PFN2, CBR2, ACSL1, FMO1, CDA, IDH1, PLCD1…	0.00218204
GOTERM_BP_FAT	GO:0010647~positive regulation of cell communication	50	NRP1, IL6ST, PRRX1, CSPG4, PRRX2, PAWR, KANK1, PTGIS, SERPINE2, ANK3, FAS, CAT, PLCB1, ADAM9, NQO2, EGFR, SLC9A3R1, PLAUR, RBPMS, CD81, PDGFRA, RIPK3, PDGFRB, RIPK2, ABAT, CHSY1, TGFB1I1, COL1A1, XDH, CYP1B1, CXCL5, C3, CRLF1, COL3A1, TIMP2, ITM2C, IGF1R, SORBS3, OXCT1, TGM2, NFATC4, THBS1, GLRX, IL1RN, GAS1, ACPP, P2RX4, TGFBR3, JAK2, ST5	0.00356348
GOTERM_BP_FAT	GO:0019220~regulation of phosphate metabolic process	53	NRP1, IL6ST, LMO4, IMPACT, CSPG4, PAWR, CASP3, ATP2B4, RRAS, FAS, FAM129A, PLCB1, ADAM9, NQO2, KIF14, PID1, EGFR, SLC9A3R1, MYADM, FARP1, THY1, PLAUR, RBPMS, CD81, RIPK3, PDGFRA, HSPB1, PDGFRB, RIPK2, VCAN, MVP, XDH, C3, CRLF1, TIMP2, APLP2, IGF1R, PFN2, SORBS3, ACSL1, IDH1, CDA, PLCD1, THBS1, FN1, FBN1, IL1RN, FABP4, TGFBR3, JAK2, URI1, ST5, GFRA2	0.00413797
GOTERM_BP_FAT	GO:0051174~regulation of phosphorus metabolic process	53	NRP1, IL6ST, LMO4, IMPACT, CSPG4, PAWR, CASP3, ATP2B4, RRAS, FAS, FAM129A, PLCB1, ADAM9, NQO2, KIF14, PID1, EGFR, SLC9A3R1, MYADM, FARP1, THY1, PLAUR, RBPMS, CD81, RIPK3, PDGFRA, HSPB1, PDGFRB, RIPK2, VCAN, MVP, XDH, C3, CRLF1, TIMP2, APLP2, IGF1R, PFN2, SORBS3, ACSL1, IDH1, CDA, PLCD1, THBS1, FN1, FBN1, IL1RN, FABP4, TGFBR3, JAK2, URI1, ST5, GFRA2	0.00421303
GOTERM_BP_FAT	GO:0009967~positive regulation of signal transduction	46	XDH, NRP1, CYP1B1, CXCL5, IL6ST, C3, CRLF1, COL3A1, PRRX1, CSPG4, PRRX2, TIMP2, ITM2C, KANK1, IGF1R, SORBS3, PTGIS, TGM2, NFATC4, FAS, CAT, THBS1, PLCB1, ADAM9, GLRX, NQO2, EGFR, IL1RN, GAS1, SLC9A3R1, ACPP, PLAUR, P2RX4, RBPMS, CD81, PDGFRA, RIPK3, PDGFRB, ABAT, TGFBR3, RIPK2, CHSY1, JAK2, COL1A1, TGFB1I1, ST5	0.0045427
GOTERM_BP_FAT	GO:1902531~regulation of intracellular signal transduction	51	NRP1, IL6ST, CSPG4, CXCL12, KANK1, ATP2B4, SERPINE2, RRAS, ARHGEF40, FAS, CAT, PLCB1, NQO2, ADAM9, KIF14, EGFR, NOL3, SLC9A3R1, MYADM, FARP1, PLAUR, CD81, PDGFRA, RIPK3, RIPK2, HSPB1, PDGFRB, XDH, CYP1B1, CXCL5, C3, CRLF1, COL3A1, ARHGAP35, TIMP2, IGF1R, SORBS3, TGM2, THBS1, PHLDA3, ARHGDIB, FN1, GLRX, IL1RN, SOD2, P2RX4, TGFBR3, JAK2, URI1, ST5, GFRA2	0.00494307
GOTERM_BP_FAT	GO:0001932~regulation of protein phosphorylation	45	XDH, NRP1, IL6ST, C3, IMPACT, CRLF1, CSPG4, TIMP2, APLP2, IGF1R, CASP3, PFN2, SORBS3, ATP2B4, ACSL1, RRAS, FAS, THBS1, PLCB1, FAM129A, ADAM9, FN1, NQO2, EGFR, KIF14, PID1, IL1RN, FBN1, SLC9A3R1, MYADM, THY1, PLAUR, RBPMS, CD81, PDGFRA, RIPK3, FABP4, PDGFRB, HSPB1, TGFBR3, RIPK2, JAK2, ST5, GFRA2, MVP	0.00738601
GOTERM_BP_FAT	GO:0035556~intracellular signal transduction	68	ATP1B1, NRP1, IL6ST, WASF2, CSPG4, CXCL12, KANK1, CASP3, ATP2B4, SERPINE2, ARHGEF40, RRAS, CAT, FAS, PLCB1, ADAM9, NQO2, EGFR, KIF14, NOL3, CRYAB, RAB4B, SAA3, SLC9A3R1, MYADM, FARP1, PLAUR, CD81, COL1A2, RIPK3, PDGFRA, RIPK2, HSPB1, PDGFRB, XDH, CYP1B1, CXCL5, C3, COL3A1, CRLF1, ARHGAP35, MAPKAPK2, TIMP2, VCAM1, IGF1R, SORBS3, TGM2, PLCD1, NFATC4, THBS1, PHLDA3, DCLK1, GLRX, ARHGDIB, FN1, CRIP1,…	0.00851555
GOTERM_BP_FAT	GO:0023056~positive regulation of signaling	49	XDH, NRP1, CYP1B1, CXCL5, IL6ST, C3, CRLF1, COL3A1, PRRX1, CSPG4, PAWR, PRRX2, TIMP2, ITM2C, KANK1, IGF1R, SORBS3, PTGIS, SERPINE2, OXCT1, TGM2, NFATC4, CAT, FAS, THBS1, PLCB1, ADAM9, GLRX, NQO2, EGFR, IL1RN, GAS1, SLC9A3R1, ACPP, PLAUR, P2RX4, RBPMS, CD81, PDGFRA, RIPK3, PDGFRB, ABAT, TGFBR3, RIPK2, CHSY1, JAK2, COL1A1, TGFB1I1, ST5	0.00924976
GOTERM_BP_FAT	GO:0042325~regulation of phosphorylation	46	XDH, NRP1, IL6ST, C3, LMO4, IMPACT, CRLF1, CSPG4, TIMP2, APLP2, IGF1R, CASP3, PFN2, SORBS3, ATP2B4, ACSL1, RRAS, FAS, THBS1, PLCB1, FAM129A, ADAM9, FN1, NQO2, EGFR, KIF14, PID1, IL1RN, FBN1, SLC9A3R1, MYADM, THY1, PLAUR, RBPMS, CD81, PDGFRA, RIPK3, FABP4, PDGFRB, HSPB1, TGFBR3, RIPK2, JAK2, ST5, GFRA2, MVP	0.0203859
GOTERM_BP_FAT	GO:0045937~positive regulation of phosphate metabolic process	36	XDH, NRP1, IL6ST, C3, LMO4, CRLF1, CSPG4, PAWR, TIMP2, IGF1R, PFN2, SORBS3, ATP2B4, ACSL1, PLCD1, FAS, THBS1, FAM129A, PLCB1, ADAM9, NQO2, EGFR, KIF14, PID1, IL1RN, FBN1, PLAUR, RBPMS, CD81, PDGFRA, RIPK3, PDGFRB, RIPK2, JAK2, ST5, GFRA2	0.0988018
GOTERM_BP_FAT	GO:0010562~positive regulation of phosphorus metabolic process	36	XDH, NRP1, IL6ST, C3, LMO4, CRLF1, CSPG4, PAWR, TIMP2, IGF1R, PFN2, SORBS3, ATP2B4, ACSL1, PLCD1, FAS, THBS1, FAM129A, PLCB1, ADAM9, NQO2, EGFR, KIF14, PID1, IL1RN, FBN1, PLAUR, RBPMS, CD81, PDGFRA, RIPK3, PDGFRB, RIPK2, JAK2, ST5, GFRA2	0.0988018
GOTERM_BP_FAT	GO:0006468~protein phosphorylation	51	NRP1, IL6ST, IMPACT, CSPG4, CASP3, ATP2B4, RRAS, FAS, FAM129A, PLCB1, ADAM9, NQO2, KIF14, PID1, EGFR, CRYAB, SAA3, SLC9A3R1, MYADM, THY1, PLAUR, RBPMS, CD81, RIPK3, PDGFRA, HSPB1, PDGFRB, RIPK2, MVP, XDH, C3, CAMK2G, CRLF1, MAPKAPK2, TIMP2, EPHB3, APLP2, IGF1R, PFN2, SORBS3, ACSL1, THBS1, DCLK1, FN1, IL1RN, FBN1, FABP4, TGFBR3, JAK2, ST5, GFRA2	0.102908
GOTERM_BP_FAT	GO:0042327~positive regulation of phosphorylation	33	XDH, NRP1, IL6ST, C3, LMO4, CRLF1, CSPG4, TIMP2, IGF1R, PFN2, SORBS3, ATP2B4, ACSL1, FAS, THBS1, FAM129A, PLCB1, ADAM9, NQO2, KIF14, EGFR, IL1RN, FBN1, PLAUR, RBPMS, CD81, PDGFRA, RIPK3, PDGFRB, RIPK2, JAK2, ST5, GFRA2	0.121453
GOTERM_BP_FAT	GO:0001934~positive regulation of protein phosphorylation	32	XDH, NRP1, IL6ST, C3, CRLF1, CSPG4, TIMP2, IGF1R, PFN2, SORBS3, ATP2B4, ACSL1, FAS, THBS1, FAM129A, PLCB1, ADAM9, NQO2, KIF14, EGFR, IL1RN, FBN1, PLAUR, RBPMS, CD81, PDGFRA, RIPK3, PDGFRB, RIPK2, JAK2, ST5, GFRA2	0.122282
GOTERM_BP_FAT	GO:0031399~regulation of protein modification process	48	XDH, NRP1, IL6ST, C3, IMPACT, CRLF1, CSPG4, PAWR, TIMP2, APLP2, IGF1R, CASP3, PFN2, SORBS3, ACSL1, ATP2B4, TMEM59, RRAS, FAS, THBS1, PLCB1, FAM129A, ADAM9, FN1, NQO2, EGFR, KIF14, PID1, IL1RN, FBN1, SLC9A3R1, MYADM, THY1, PLAUR, RBPMS, CD81, PDGFRA, RIPK3, FABP4, PDGFRB, HSPB1, TGFBR3, RIPK2, JAK2, VCAN, ST5, GFRA2, MVP	0.143436
GOTERM_BP_FAT	GO:0051246~regulation of protein metabolic process	65	NRP1, LXN, IL6ST, IMPACT, CSPG4, PAWR, CASP3, ATP2B4, SERPINE2, TMEM59, RRAS, DDA1, DAP, FAS, PLCB1, FAM129A, ADAM9, NQO2, EGFR, KIF14, PID1, NOL3, CRYAB, SLC9A3R1, MYADM, PLAUR, THY1, SERPINB9, RBPMS, CD81, RIPK3, PDGFRA, HSPB1, PDGFRB, RIPK2, VCAN, MVP, XDH, GLG1, CYP1B1, C3, CRLF1, SERPINB1A, MAPKAPK2, TIMP2, ITM2B, ITM2C, APLP2, IGF1R, SORBS3, PFN2, ACSL1, THBS1, FN1, CEBPB, FBN1, IL1RN, GAS1…	0.224606
GOTERM_BP_FAT	GO:0032268~regulation of cellular protein metabolic process	61	NRP1, LXN, IL6ST, IMPACT, CSPG4, PAWR, CASP3, ATP2B4, SERPINE2, TMEM59, RRAS, DDA1, DAP, FAS, PLCB1, FAM129A, ADAM9, NQO2, EGFR, KIF14, PID1, NOL3, CRYAB, SLC9A3R1, MYADM, PLAUR, THY1, SERPINB9, RBPMS, CD81, RIPK3, PDGFRA, HSPB1, PDGFRB, RIPK2, VCAN, MVP, XDH, GLG1, CYP1B1, C3, CRLF1, SERPINB1A, TIMP2, APLP2, IGF1R, PFN2, SORBS3, ACSL1, THBS1, FN1, FBN1, IL1RN, GAS1, FABP4, TGFBR3, JAK2, SH3D19, …	0.272025
GOTERM_BP_FAT	GO:0016310~phosphorylation	56	NRP1, IL6ST, LMO4, IMPACT, CSPG4, CKB, CASP3, ATP2B4, RRAS, FAS, PLCB1, FAM129A, ADAM9, NQO2, EGFR, KIF14, PID1, CRYAB, SAA3, SLC9A3R1, MYADM, PLAUR, THY1, RBPMS, CD81, RIPK3, PDGFRA, HSPB1, PDGFRB, RIPK2, MVP, XDH, C3, CAMK2G, CRLF1, MAPKAPK2, EPHB3, TIMP2, APLP2, IGF1R, PFN2, SORBS3, ACSL1, THBS1, PAPSS2, DCLK1, FN1, FBN1, IL1RN, AK3, FABP4, TGFBR3, JAK2, GUK1, ST5, GFRA2	0.321151
GOTERM_BP_FAT	GO:0000165~MAPK cascade	26	XDH, EGFR, NRP1, C3, CRYAB, IL1RN, CSPG4, MAPKAPK2, SLC9A3R1, TIMP2, IGF1R, SORBS3, CD81, PDGFRA, PDGFRB, TGFBR3, RRAS, RIPK2, JAK2, FAS, THBS1, PLCB1, ST5, ADAM9, FN1, NQO2	0.346846
GOTERM_BP_FAT	GO:1902533~positive regulation of intracellular signal transduction	31	XDH, CYP1B1, NRP1, CXCL5, IL6ST, C3, CRLF1, COL3A1, CSPG4, TIMP2, IGF1R, SORBS3, TGM2, FAS, CAT, THBS1, PLCB1, ADAM9, NQO2, GLRX, EGFR, IL1RN, SLC9A3R1, P2RX4, CD81, PDGFRA, RIPK3, PDGFRB, RIPK2, JAK2, ST5	0.36952
GOTERM_BP_FAT	GO:0023014~signal transduction by protein phosphorylation	26	XDH, EGFR, NRP1, C3, CRYAB, IL1RN, CSPG4, MAPKAPK2, SLC9A3R1, TIMP2, IGF1R, SORBS3, CD81, PDGFRA, PDGFRB, TGFBR3, RRAS, RIPK2, JAK2, FAS, THBS1, PLCB1, ST5, ADAM9, FN1, NQO2	0.380413
GOTERM_BP_FAT	GO:0044093~positive regulation of molecular function	39	XDH, SNX18, ATP1B1, GM2A, CALD1, LMO4, CSPG4, ARHGAP35, PAWR, TIMP2, TPM1, PFN2, ATP2B4, ACSL1, ANK3, DAP, FAS, CAT, THBS1, PLCB1, ADAM9, GLRX, KIF14, EGFR, TBC1D2B, GNAO1, IL1RN, FBN1, S100A10, THY1, PLAUR, CD81, PDGFRA, RIPK3, PDGFRB, TGFBR3, RIPK2, JAK2, ANTXR1	0.419243
GOTERM_BP_FAT	GO:0043410~positive regulation of MAPK cascade	20	EGFR, XDH, NRP1, C3, IL1RN, CSPG4, TIMP2, IGF1R, SORBS3, CD81, PDGFRA, PDGFRB, RIPK2, JAK2, FAS, THBS1, PLCB1, ST5, ADAM9, NQO2	0.497439
GOTERM_BP_FAT	GO:0043085~positive regulation of catalytic activity	31	XDH, SNX18, ATP1B1, GM2A, LMO4, CSPG4, ARHGAP35, PAWR, TIMP2, TPM1, PFN2, ATP2B4, ACSL1, FAS, DAP, THBS1, ADAM9, KIF14, EGFR, TBC1D2B, GNAO1, IL1RN, FBN1, S100A10, THY1, CD81, PDGFRA, RIPK3, PDGFRB, JAK2, ANTXR1	1.08283
GOTERM_BP_FAT	GO:0051345~positive regulation of hydrolase activity	19	XDH, SNX18, ATP1B1, TBC1D2B, GNAO1, GM2A, S100A10, ARHGAP35, PAWR, TPM1, THY1, PFN2, PDGFRA, RIPK3, PDGFRB, JAK2, ANTXR1, FAS, DAP	1.28941
GOTERM_BP_FAT	GO:0043408~regulation of MAPK cascade	24	EGFR, XDH, NRP1, C3, IL1RN, CSPG4, TIMP2, SLC9A3R1, IGF1R, SORBS3, CD81, PDGFRA, PDGFRB, TGFBR3, RRAS, RIPK2, JAK2, FAS, THBS1, PLCB1, ST5, ADAM9, NQO2, FN1	1.44672
GOTERM_BP_FAT	GO:0031401~positive regulation of protein modification process	33	XDH, NRP1, IL6ST, C3, CRLF1, CSPG4, PAWR, TIMP2, IGF1R, PFN2, SORBS3, ATP2B4, ACSL1, FAS, THBS1, FAM129A, PLCB1, ADAM9, NQO2, KIF14, EGFR, IL1RN, FBN1, PLAUR, RBPMS, CD81, PDGFRA, RIPK3, PDGFRB, RIPK2, JAK2, ST5, GFRA2	1.63294
GOTERM_BP_FAT	GO:0051247~positive regulation of protein metabolic process	40	XDH, NRP1, CYP1B1, IL6ST, C3, IMPACT, CRLF1, CSPG4, MAPKAPK2, PAWR, TIMP2, IGF1R, PFN2, SORBS3, ATP2B4, ACSL1, DAP, FAS, THBS1, PLCB1, FAM129A, ADAM9, NQO2, EGFR, KIF14, IL1RN, FBN1, PLAUR, RBPMS, CD81, PDGFRA, RIPK3, PDGFRB, HSPB1, RIPK2, JAK2, SH3D19, ANTXR1, ST5, GFRA2	2.01288
GOTERM_BP_FAT	GO:0032270~positive regulation of cellular protein metabolic process	38	XDH, NRP1, CYP1B1, IL6ST, C3, IMPACT, CRLF1, CSPG4, PAWR, TIMP2, IGF1R, PFN2, SORBS3, ATP2B4, ACSL1, DAP, FAS, THBS1, PLCB1, FAM129A, ADAM9, NQO2, EGFR, KIF14, IL1RN, FBN1, PLAUR, RBPMS, CD81, PDGFRA, RIPK3, PDGFRB, RIPK2, JAK2, SH3D19, ANTXR1, ST5, GFRA2	2.0825
GOTERM_BP_FAT	GO:0043549~regulation of kinase activity	23	KIF14, EGFR, LMO4, IL1RN, FBN1, CSPG4, SLC9A3R1, APLP2, THY1, IGF1R, CASP3, ACSL1, ATP2B4, CD81, PDGFRA, RIPK3, FABP4, PDGFRB, HSPB1, JAK2, THBS1, ADAM9, MVP	3.17699
GOTERM_BP_FAT	GO:0009893~positive regulation of metabolic process	69	NRP1, IL6ST, IMPACT, LMO4, PRRX1, CSPG4, PAWR, ACTG2, ATP2B4, ANK3, FAS, DAP, PLCB1, FAM129A, ADAM9, NQO2, EGFR, KIF14, PID1, PCBD2, MICAL2, PLAUR, EYA4, SERPINB9, RBPMS, CD81, RIPK3, PDGFRA, ABAT, HSPB1, PDGFRB, RIPK2, FOXC1, TMSB4X, COL1A1, TGFB1I1, XDH, CYP1B1, LRRC32, C3, CRLF1, MAPKAPK2, TIMP2, IGF1R, SORBS3, PFN2, ACSL1, MEIS2, SORBS1, PLCD1, NFATC4, THBS1, FN1, CEBPB, FBN1, IL1RN, ANXA1, M…	4.8768
GOTERM_BP_FAT	GO:0045859~regulation of protein kinase activity	21	KIF14, EGFR, IL1RN, FBN1, CSPG4, SLC9A3R1, APLP2, THY1, IGF1R, CASP3, ACSL1, ATP2B4, CD81, RIPK3, FABP4, PDGFRB, HSPB1, JAK2, THBS1, ADAM9, MVP	5.26274
GOTERM_BP_FAT	GO:0031325~positive regulation of cellular metabolic process	63	NRP1, IL6ST, LMO4, IMPACT, PRRX1, CSPG4, PAWR, ATP2B4, DAP, FAS, PLCB1, FAM129A, ADAM9, NQO2, EGFR, KIF14, PID1, PCBD2, MICAL2, PLAUR, EYA4, RBPMS, CD81, RIPK3, PDGFRA, ABAT, HSPB1, PDGFRB, RIPK2, FOXC1, TMSB4X, COL1A1, TGFB1I1, XDH, CYP1B1, C3, CRLF1, MAPKAPK2, TIMP2, IGF1R, PFN2, SORBS3, ACSL1, MEIS2, SORBS1, PLCD1, NFATC4, THBS1, CEBPB, FBN1, IL1RN, ANXA1, MUSTN1, FOXP1, CPT1A, SOD2, PLA2G4A, …	9.75435
GOTERM_BP_FAT	GO:0070372~regulation of ERK1 and ERK2 cascade	12	EGFR, NRP1, C3, PDGFRA, PDGFRB, TGFBR3, RIPK2, RRAS, SLC9A3R1, ST5, NQO2, FN1	10.1321
GOTERM_BP_FAT	GO:0010604~positive regulation of macromolecule metabolic process	63	NRP1, IL6ST, IMPACT, LMO4, PRRX1, CSPG4, PAWR, ACTG2, ATP2B4, ANK3, DAP, FAS, PLCB1, FAM129A, ADAM9, NQO2, EGFR, KIF14, PID1, PCBD2, MICAL2, PLAUR, EYA4, SERPINB9, RBPMS, CD81, RIPK3, PDGFRA, HSPB1, PDGFRB, RIPK2, FOXC1, TMSB4X, COL1A1, TGFB1I1, XDH, CYP1B1, LRRC32, C3, CRLF1, MAPKAPK2, TIMP2, IGF1R, PFN2, SORBS3, ACSL1, MEIS2, SORBS1, NFATC4, THBS1, FN1, CEBPB, FBN1, IL1RN, MUSTN1, FOXP1, LCN2, …	11.7581
GOTERM_BP_FAT	GO:0051338~regulation of transferase activity	23	KIF14, EGFR, LMO4, IL1RN, FBN1, CSPG4, SLC9A3R1, APLP2, THY1, IGF1R, CASP3, ACSL1, ATP2B4, CD81, PDGFRA, RIPK3, FABP4, PDGFRB, HSPB1, JAK2, THBS1, ADAM9, MVP	14.5638
GOTERM_BP_FAT	GO:0033674~positive regulation of kinase activity	15	KIF14, EGFR, LMO4, IL1RN, FBN1, CSPG4, ACSL1, ATP2B4, CD81, PDGFRA, RIPK3, PDGFRB, JAK2, THBS1, ADAM9	17.5322
GOTERM_BP_FAT	GO:0032147~activation of protein kinase activity	9	EGFR, KIF14, FBN1, CD81, RIPK3, CSPG4, JAK2, THBS1, ADAM9	33.6334
GOTERM_BP_FAT	GO:0045860~positive regulation of protein kinase activity	13	EGFR, KIF14, FBN1, IL1RN, CSPG4, ATP2B4, ACSL1, CD81, RIPK3, PDGFRB, JAK2, THBS1, ADAM9	39.78
GOTERM_BP_FAT	GO:0051347~positive regulation of transferase activity	15	KIF14, EGFR, LMO4, IL1RN, FBN1, CSPG4, ACSL1, ATP2B4, CD81, PDGFRA, RIPK3, PDGFRB, JAK2, THBS1, ADAM9	47.277
GOTERM_BP_FAT	GO:0070374~positive regulation of ERK1 and ERK2 cascade	8	EGFR, NRP1, C3, PDGFRA, PDGFRB, RIPK2, ST5, NQO2	51.0747
GOTERM_BP_FAT	GO:0070371~ERK1 and ERK2 cascade	9	EGFR, NRP1, C3, PDGFRA, PDGFRB, RIPK2, SLC9A3R1, ST5, NQO2	74.3583
GOTERM_BP_FAT	GO:0071900~regulation of protein serine/threonine kinase activity	12	EGFR, IGF1R, CASP3, ACSL1, ATP2B4, IL1RN, CD81, CSPG4, PDGFRB, JAK2, THBS1, ADAM9	74.8336
GOTERM_BP_FAT	GO:0043405~regulation of MAP kinase activity	9	EGFR, IGF1R, IL1RN, CD81, CSPG4, PDGFRB, JAK2, THBS1, ADAM9	83.2403
GOTERM_BP_FAT	GO:0071902~positive regulation of protein serine/threonine kinase activity	8	EGFR, ACSL1, ATP2B4, IL1RN, CD81, CSPG4, PDGFRB, THBS1	93.4412
GOTERM_BP_FAT	GO:0043406~positive regulation of MAP kinase activity	6	EGFR, IL1RN, CD81, CSPG4, PDGFRB, THBS1	97.7307
GOTERM_BP_FAT	GO:0036211~protein modification process	63	NRP1, IL6ST, IMPACT, CSPG4, PAWR, CASP3, ATP2B4, TMEM59, RRAS, FAS, PLCB1, FAM129A, ADAM9, NQO2, EGFR, KIF14, PID1, PTPRK, CRYAB, SAA3, SLC9A3R1, MYADM, PLAUR, THY1, EYA4, RBPMS, CD81, RIPK3, PDGFRA, HSPB1, PDGFRB, RIPK2, VCAN, MVP, XDH, C3, CAMK2G, COL3A1, CRLF1, MAPKAPK2, EPHB3, TIMP2, APLP2, IGF1R, PFN2, SORBS3, ACSL1, EOGT, TGM2, THBS1, DCLK1, FN1, AGA, FBN1, IL1RN, ANXA1, MACROD1, PPIC, FABP…	99.4493
GOTERM_BP_FAT	GO:0006464~cellular protein modification process	63	NRP1, IL6ST, IMPACT, CSPG4, PAWR, CASP3, ATP2B4, TMEM59, RRAS, FAS, PLCB1, FAM129A, ADAM9, NQO2, EGFR, KIF14, PID1, PTPRK, CRYAB, SAA3, SLC9A3R1, MYADM, PLAUR, THY1, EYA4, RBPMS, CD81, RIPK3, PDGFRA, HSPB1, PDGFRB, RIPK2, VCAN, MVP, XDH, C3, CAMK2G, COL3A1, CRLF1, MAPKAPK2, EPHB3, TIMP2, APLP2, IGF1R, PFN2, SORBS3, ACSL1, EOGT, TGM2, THBS1, DCLK1, FN1, AGA, FBN1, IL1RN, ANXA1, MACROD1, PPIC, FABP…	99.4493
GOTERM_BP_FAT	GO:0000187~activation of MAPK activity	3	CD81, CSPG4, THBS1	99.9999
GOTERM_BP_FAT	GO:0010556~regulation of macromolecule biosynthetic process	55	AEBP1, LMO4, IMPACT, PRRX1, PRRX2, PAWR, PTGIS, ATP2B4, PBXIP1, TMEM59, DAP, CAT, PLCB1, FAM129A, EGFR, PID1, PTPRK, PCBD2, MICAL2, EYA4, RBPMS, CD81, RIPK3, PDGFRA, HSPB1, PDGFRB, RIPK2, FOXC1, TMSB4X, COL1A1, TGFB1I1, CYP1B1, ARHGAP35, MAPKAPK2, ITM2B, ITM2C, IGF1R, SORBS3, MEIS2, SORBS1, NFATC4, GLO1, THBS1, CHD3, CEBPB, FBN1, MUSTN1, FOXP1, SOD2, FABP4, TGFBR3, PBX1, JAK2, URI1, IFI204	100
GOTERM_BP_FAT	GO:2000112~regulation of cellular macromolecule biosynthetic process	53	AEBP1, LMO4, IMPACT, PRRX1, PRRX2, PAWR, PTGIS, ATP2B4, PBXIP1, TMEM59, DAP, CAT, FAM129A, PLCB1, PID1, EGFR, PTPRK, PCBD2, MICAL2, EYA4, RBPMS, CD81, RIPK3, PDGFRA, PDGFRB, RIPK2, FOXC1, TMSB4X, COL1A1, TGFB1I1, CYP1B1, ARHGAP35, ITM2B, ITM2C, IGF1R, SORBS3, MEIS2, SORBS1, NFATC4, GLO1, THBS1, CHD3, CEBPB, FBN1, MUSTN1, FOXP1, SOD2, FABP4, TGFBR3, PBX1, JAK2, URI1, IFI204	100
GOTERM_BP_FAT	GO:0019219~regulation of nucleobase-containing compound metabolic process	49	AEBP1, CYP1B1, LMO4, IMPACT, PRRX1, ARHGAP35, PAWR, PRRX2, TIMP2, IGF1R, SORBS3, PTGIS, ATP2B4, MEIS2, PBXIP1, CDA, NFATC4, GLO1, DAP, CAT, THBS1, PLCB1, CHD3, EGFR, PID1, PTPRK, CEBPB, PCBD2, MICAL2, FBN1, FOXP1, SOD2, EYA4, RBPMS, CD81, PDGFRA, RIPK3, FABP4, PDGFRB, TGFBR3, RIPK2, FOXC1, TMSB4X, JAK2, PBX1, COL1A1, TGFB1I1, URI1, IFI204	100
GOTERM_BP_FAT	GO:0051171~regulation of nitrogen compound metabolic process	51	AEBP1, LMO4, IMPACT, PRRX1, PRRX2, PAWR, PTGIS, ATP2B4, PBXIP1, DAP, CAT, FAM129A, PLCB1, PID1, EGFR, PTPRK, PCBD2, MICAL2, EYA4, RBPMS, CD81, RIPK3, PDGFRA, PDGFRB, RIPK2, ABAT, FOXC1, TMSB4X, COL1A1, TGFB1I1, CYP1B1, ARHGAP35, TIMP2, IGF1R, SORBS3, MEIS2, CDA, NFATC4, GLO1, THBS1, CHD3, CEBPB, FBN1, FOXP1, SOD2, FABP4, TGFBR3, PBX1, JAK2, URI1, IFI204	100
Annotation Cluster 14	Enrichment Score: 3.4150213290906013
Category	Term	Count	Genes	FDR
GOTERM_BP_FAT	GO:0060429~epithelium development	47	XDH, ENAH, NRP1, LMO4, PTGS1, CRLF1, ARHGAP35, COL2A1, CXCL12, MMP2, VCAM1, ANXA7, IGF1R, CASP3, SERPINE2, FAT1, TGM2, NFATC4, CAT, FNDC3A, ADAM9, EGFR, COL18A1, CEBPB, SLC12A2, MICAL2, ANXA1, MGP, GAS1, SLC9A3R1, PALLD, MMP14, MYADM, VASP, FOXP1, COL5A1, CPT1A, PLAUR, CTSL, TAGLN, PDGFRA, TGFBR3, FOXC1, JAK2, PBX1, VCAN, TGFB1I1	3.48477e-05
GOTERM_BP_FAT	GO:0048729~tissue morphogenesis	27	ENAH, NRP1, LMO4, COL3A1, ARHGAP35, MMP2, TPM1, CXCL12, ACTG2, IGF1R, TGM2, NFATC4, EGFR, SLC12A2, MICAL2, MGP, SLC9A3R1, MMP14, COL5A1, VASP, CTSL, PKP2, PDGFRA, TGFBR3, PBX1, FOXC1, TGFB1I1	0.0457936
GOTERM_BP_FAT	GO:0035295~tube development	27	ENAH, NRP1, LMO4, COL3A1, CRLF1, ARHGAP35, EPHB3, CXCL12, SERPINE2, TGM2, NFATC4, LOX, CAT, EGFR, SLC12A2, MICAL2, MGP, GAS1, MMP14, FOXP1, VASP, CTSL, PDGFRA, PDGFRB, PBX1, VCAN, FOXC1	0.177875
GOTERM_BP_FAT	GO:0002009~morphogenesis of an epithelium	21	EGFR, ENAH, NRP1, SLC12A2, MICAL2, LMO4, MGP, ARHGAP35, SLC9A3R1, MMP14, MMP2, CXCL12, COL5A1, VASP, IGF1R, CTSL, PDGFRA, TGM2, PBX1, NFATC4, TGFB1I1	1.08434
GOTERM_BP_FAT	GO:0035239~tube morphogenesis	17	EGFR, ENAH, NRP1, SLC12A2, MICAL2, LMO4, MGP, ARHGAP35, EPHB3, MMP14, CXCL12, VASP, CTSL, PDGFRA, TGM2, PBX1, NFATC4	2.48156
GOTERM_BP_FAT	GO:0001763~morphogenesis of a branching structure	11	CTSL, NRP1, CPE, SLC12A2, PDGFRA, TGM2, MGP, NFATC4, PBX1, MMP14, CXCL12	11.5955
GOTERM_BP_FAT	GO:0060562~epithelial tube morphogenesis	14	CTSL, ENAH, NRP1, SLC12A2, MICAL2, LMO4, PDGFRA, MGP, ARHGAP35, NFATC4, PBX1, MMP14, CXCL12, VASP	14.451
GOTERM_BP_FAT	GO:0061138~morphogenesis of a branching epithelium	10	CTSL, NRP1, SLC12A2, PDGFRA, TGM2, MGP, NFATC4, PBX1, MMP14, CXCL12	16.6115
GOTERM_BP_FAT	GO:0048754~branching morphogenesis of an epithelial tube	9	CTSL, NRP1, SLC12A2, PDGFRA, MGP, NFATC4, PBX1, MMP14, CXCL12	18.85
Annotation Cluster 15	Enrichment Score: 3.3762193651980668
Category	Term	Count	Genes	FDR
GOTERM_BP_FAT	GO:0006082~organic acid metabolic process	31	LDHB, ACADSB, CYP1B1, ECH1, RBP1, C3, PTGS1, PGD, ECHS1, ACOT1, AUH, PTGIS, ATP2B4, ACSL1, CSAD, FMO1, IDH1, GLO1, ACSL4, ACADM, ANXA1, CYB5A, CPT1A, ABCG2, PLA2G4A, GFPT2, FABP4, ABAT, GAMT, OAT, PON3	0.217599
GOTERM_BP_FAT	GO:0032787~monocarboxylic acid metabolic process	23	LDHB, ACADSB, ACADM, CYP1B1, ECH1, RBP1, C3, PTGS1, PGD, ANXA1, ECHS1, ACOT1, CYB5A, CPT1A, AUH, PLA2G4A, ACSL1, PTGIS, FABP4, IDH1, GLO1, ACSL4, PON3	0.226989
GOTERM_BP_FAT	GO:0006629~lipid metabolic process	38	HSD17B11, ACADSB, CYP1B1, ECH1, GM2A, RBP1, IL6ST, C3, PTGS1, ACOT1, ECHS1, APLP2, AUH, IGF1R, PTGIS, ACSL1, SORBS1, IDH1, PLCD1, CAT, PLCB1, ACSL4, EGFR, ACADM, LPGAT1, IL1RN, ANXA1, CYB5A, CPT1A, TMEM55A, PLA2G4A, LRP1, DHRS4, CD81, PDGFRA, FABP4, PDGFRB, PBX1	0.373384
GOTERM_BP_FAT	GO:0019752~carboxylic acid metabolic process	28	LDHB, ACADSB, CYP1B1, ECH1, RBP1, C3, PTGS1, PGD, ECHS1, ACOT1, AUH, ATP2B4, ACSL1, PTGIS, CSAD, IDH1, GLO1, ACSL4, ACADM, ANXA1, CYB5A, CPT1A, PLA2G4A, GFPT2, FABP4, ABAT, OAT, PON3	0.488043
GOTERM_BP_FAT	GO:0043436~oxoacid metabolic process	28	LDHB, ACADSB, CYP1B1, ECH1, RBP1, C3, PTGS1, PGD, ECHS1, ACOT1, AUH, ATP2B4, ACSL1, PTGIS, CSAD, IDH1, GLO1, ACSL4, ACADM, ANXA1, CYB5A, CPT1A, PLA2G4A, GFPT2, FABP4, ABAT, OAT, PON3	0.555391
GOTERM_BP_FAT	GO:0006631~fatty acid metabolic process	17	ACADSB, CYP1B1, ECH1, ACADM, C3, PTGS1, ANXA1, ACOT1, ECHS1, CYB5A, CPT1A, AUH, PLA2G4A, ACSL1, PTGIS, FABP4, ACSL4	0.806189
GOTERM_BP_FAT	GO:0046395~carboxylic acid catabolic process	11	ACADSB, ECH1, ACADM, ATP2B4, CSAD, ABAT, ECHS1, OAT, PON3, CPT1A, AUH	0.899902
GOTERM_BP_FAT	GO:0044255~cellular lipid metabolic process	30	ACADSB, CYP1B1, ECH1, RBP1, GM2A, IL6ST, C3, PTGS1, ACOT1, ECHS1, AUH, PTGIS, ACSL1, IDH1, CAT, ACSL4, PLCB1, EGFR, ACADM, LPGAT1, ANXA1, CYB5A, CPT1A, TMEM55A, PLA2G4A, DHRS4, CD81, PDGFRA, FABP4, PDGFRB	0.976542
GOTERM_BP_FAT	GO:0016054~organic acid catabolic process	11	ACADSB, ECH1, ACADM, ATP2B4, CSAD, ABAT, ECHS1, OAT, PON3, CPT1A, AUH	2.28757
GOTERM_BP_FAT	GO:0016042~lipid catabolic process	12	PLA2G4A, ACADSB, ECH1, ACADM, CYP1B1, GM2A, ECHS1, IDH1, PLCD1, PLCB1, CPT1A, AUH	11.177
Annotation Cluster 16	Enrichment Score: 3.35111918865663
Category	Term	Count	Genes	FDR
GOTERM_BP_FAT	GO:0010033~response to organic substance	85	NRP1, IL6ST, OSMR, IMPACT, MMP2, CXCL12, KANK1, CASP3, ATP2B4, PTGIS, CAT, FAS, LOX, PLCB1, NQO1, GPC1, ADAM9, EGFR, PID1, PTPRK, NOL3, CRYAB, SAA3, MMP14, CTSL, H6PD, CD81, COL1A2, PDGFRA, ABAT, RIPK2, HSPB1, PDGFRB, FOXC1, COL1A1, TGFB1I1, XDH, GLG1, CYP1B1, RBP1, CXCL5, CALD1, COL3A1, MME, COL2A1, GNG12, MAPKAPK2, TIMP2, VCAM1, ANXA7, IGF1R, MEIS2, ACSL1, SORBS1, FMO1, OXCT1, IDH1, PLCD1, ACSL…	0.000256148
GOTERM_BP_FAT	GO:0070887~cellular response to chemical stimulus	74	NRP1, OSMR, IL6ST, IMPACT, PAWR, MMP2, CXCL12, KANK1, GSTM1, GSTM2, CASP3, ATP2B4, PTGIS, ANK3, CAT, FAS, PLCB1, GPC1, ADAM9, EGFR, PID1, PTPRK, NOL3, SAA3, CD81, COL1A2, PDGFRA, RIPK2, HSPB1, PDGFRB, FOXC1, COL1A1, TGFB1I1, XDH, GLG1, CYP1B1, CXCL5, COL3A1, MME, COL2A1, MAPKAPK2, TIMP2, TPM1, VCAM1, IGF1R, ACSL1, SORBS1, OXCT1, NFATC4, THBS1, GLRX, FN1, CRIP1, CEBPB, FBN1, IL1RN, ANXA1, S100A10,…	0.00332696
GOTERM_BP_FAT	GO:1901700~response to oxygen-containing compound	54	IMPACT, PAWR, CXCL12, MMP2, KANK1, CASP3, ATP2B4, FAS, CAT, NQO1, PLCB1, ADAM9, PID1, EGFR, PTPRK, NOL3, CRYAB, CTSL, H6PD, COL1A2, PDGFRA, PDGFRB, RIPK2, ABAT, COL1A1, CYP1B1, CXCL5, COL3A1, GNG12, MAPKAPK2, TPM1, VCAM1, IGF1R, ACSL1, SORBS1, FMO1, OXCT1, PLCD1, THBS1, GLRX, COL18A1, CEBPB, GNAO1, ANXA1, FOXP1, CPT1A, SOD2, ABCG2, LCN2, P2RX4, TGFBR3, JAK2, MGST1, CD14	0.0036466
GOTERM_BP_FAT	GO:0071310~cellular response to organic substance	62	NRP1, OSMR, IL6ST, IMPACT, CXCL12, MMP2, KANK1, CASP3, ATP2B4, PTGIS, CAT, PLCB1, GPC1, ADAM9, EGFR, PID1, PTPRK, NOL3, SAA3, CD81, COL1A2, PDGFRA, HSPB1, PDGFRB, RIPK2, FOXC1, COL1A1, TGFB1I1, XDH, GLG1, CYP1B1, CXCL5, COL3A1, MME, COL2A1, MAPKAPK2, TIMP2, VCAM1, IGF1R, ACSL1, SORBS1, OXCT1, THBS1, GLRX, FN1, CEBPB, FBN1, IL1RN, ANXA1, GAS1, FOXP1, CPT1A, SOD2, ABCG2, LCN2, P2RX4, FABP4, TGFBR3,…	0.010078
GOTERM_BP_FAT	GO:0009719~response to endogenous stimulus	50	GLG1, IMPACT, CALD1, COL3A1, COL2A1, TIMP2, MMP2, CXCL12, KANK1, VCAM1, IGF1R, ACSL1, ATP2B4, SORBS1, OXCT1, IDH1, PLCD1, CAT, LOX, FAS, PLCB1, THBS1, GPC1, ADAM9, EGFR, PID1, PTPRK, GNAO1, CEBPB, FBN1, IL1RN, ANXA1, MMP14, FOXP1, ABCG2, P2RX4, CTSL, CD81, COL1A2, PDGFRA, ABAT, RIPK2, TGFBR3, ABCC4, JAK2, COL1A1, TGFB1I1, URI1, MGST1, NNMT	0.0286179
GOTERM_BP_FAT	GO:0014070~response to organic cyclic compound	36	CYP1B1, IMPACT, MMP2, VCAM1, ANXA7, ATP2B4, ACSL1, IDH1, FAS, LOX, CAT, THBS1, NQO1, ADAM9, GLRX, EGFR, GNAO1, CEBPB, CRYAB, IL1RN, SAA3, ANXA1, EPHX1, MMP14, CPT1A, FOXP1, ABCG2, P2RX4, CTSL, PDGFRB, ABCC4, ABAT, RIPK2, JAK2, COL1A1, URI1	0.0384598
GOTERM_BP_FAT	GO:0033993~response to lipid	35	CXCL5, RBP1, MAPKAPK2, GNG12, MMP2, VCAM1, ACSL1, FMO1, IDH1, LOX, FAS, CAT, THBS1, NQO1, ADAM9, GLRX, EGFR, PID1, CEBPB, CRYAB, IL1RN, ANXA1, CPT1A, FOXP1, ABCG2, SOD2, LCN2, CTSL, PDGFRB, RIPK2, JAK2, COL1A1, URI1, CD14, MGST1	0.0687385
GOTERM_BP_FAT	GO:1901701~cellular response to oxygen-containing compound	34	CYP1B1, IMPACT, COL3A1, PAWR, MMP2, TPM1, KANK1, VCAM1, IGF1R, ATP2B4, SORBS1, OXCT1, THBS1, PLCB1, ADAM9, GLRX, PID1, EGFR, PTPRK, CEBPB, NOL3, ANXA1, CPT1A, ABCG2, SOD2, LCN2, P2RX4, PDGFRA, COL1A2, RIPK2, JAK2, COL1A1, CD14, MGST1	0.582187
GOTERM_BP_FAT	GO:0010243~response to organonitrogen compound	28	IMPACT, COL3A1, MMP2, CXCL12, KANK1, VCAM1, IGF1R, ATP2B4, SORBS1, PLCD1, CAT, PLCB1, PID1, EGFR, GNAO1, CEBPB, ANXA1, ABCG2, P2RX4, PDGFRA, COL1A2, ABCC4, RIPK2, ABAT, JAK2, COL1A1, MGST1, NNMT	2.36139
GOTERM_BP_FAT	GO:0001101~response to acid chemical	16	EGFR, COL18A1, PID1, CEBPB, COL3A1, S100A10, MMP2, CPT1A, SOD2, ABCG2, ATP2B4, PDGFRA, COL1A2, PDGFRB, CAT, COL1A1	3.63973
GOTERM_BP_FAT	GO:1901698~response to nitrogen compound	30	IMPACT, COL3A1, MMP2, CXCL12, KANK1, VCAM1, GSTM2, IGF1R, ATP2B4, SORBS1, PLCD1, CAT, THBS1, PLCB1, PID1, EGFR, GNAO1, CEBPB, ANXA1, ABCG2, P2RX4, PDGFRA, COL1A2, ABCC4, RIPK2, ABAT, JAK2, COL1A1, MGST1, NNMT	4.0027
GOTERM_BP_FAT	GO:0071495~cellular response to endogenous stimulus	32	GLG1, IMPACT, COL3A1, COL2A1, MMP2, KANK1, IGF1R, ATP2B4, ACSL1, SORBS1, THBS1, PLCB1, GPC1, ADAM9, PID1, EGFR, PTPRK, CEBPB, FBN1, ANXA1, FOXP1, ABCG2, P2RX4, CD81, PDGFRA, COL1A2, RIPK2, TGFBR3, JAK2, COL1A1, TGFB1I1, URI1	12.3209
GOTERM_BP_FAT	GO:0071417~cellular response to organonitrogen compound	17	EGFR, PID1, CEBPB, IMPACT, COL3A1, MMP2, KANK1, P2RX4, IGF1R, ATP2B4, SORBS1, PDGFRA, COL1A2, RIPK2, JAK2, COL1A1, PLCB1	21.6133
GOTERM_BP_FAT	GO:1901699~cellular response to nitrogen compound	18	EGFR, PID1, CEBPB, IMPACT, COL3A1, MMP2, KANK1, P2RX4, IGF1R, ATP2B4, SORBS1, PDGFRA, COL1A2, RIPK2, JAK2, COL1A1, THBS1, PLCB1	34.8421
GOTERM_BP_FAT	GO:0071229~cellular response to acid chemical	10	EGFR, PID1, CEBPB, COL3A1, COL1A2, PDGFRA, S100A10, COL1A1, MMP2, CPT1A	35.9653
GOTERM_BP_FAT	GO:0071230~cellular response to amino acid stimulus	7	EGFR, CEBPB, COL3A1, COL1A2, PDGFRA, COL1A1, MMP2	45.0382
GOTERM_BP_FAT	GO:1901652~response to peptide	12	PID1, IGF1R, SORBS1, ANXA1, RIPK2, PLCD1, JAK2, COL1A1, CAT, PLCB1, CXCL12, KANK1	80.3487
GOTERM_BP_FAT	GO:0043200~response to amino acid	7	EGFR, CEBPB, COL3A1, COL1A2, PDGFRA, COL1A1, MMP2	81.6086
Annotation Cluster 17	Enrichment Score: 3.3213829921767863
Category	Term	Count	Genes	FDR
GOTERM_BP_FAT	GO:0044057~regulation of system process	22	EGFR, ATP1B1, GNAO1, NOL3, CALD1, CAMK2G, PTGS1, ANPEP, PAWR, SLC9A3R1, MMP2, TPM1, ACPP, ABCG2, ANXA6, P2RX4, COL14A1, ATP2B4, HSPB6, PKP2, ABAT, JAK2	0.170801
GOTERM_BP_FAT	GO:0003012~muscle system process	18	ATP1B1, NOL3, CALD1, CAMK2G, PDLIM5, PTGS1, ANXA1, PAWR, TPM2, TPM1, ANXA6, P2RX4, COL14A1, ATP2B4, HSPB6, PKP2, ABAT, LMOD1	0.215559
GOTERM_BP_FAT	GO:0090257~regulation of muscle system process	13	ANXA6, P2RX4, ATP1B1, COL14A1, ATP2B4, NOL3, HSPB6, PKP2, CALD1, CAMK2G, PTGS1, ABAT, PAWR	0.318255
GOTERM_BP_FAT	GO:0006937~regulation of muscle contraction	9	ANXA6, P2RX4, ATP1B1, HSPB6, PKP2, CALD1, PTGS1, ABAT, PAWR	4.7524
GOTERM_BP_FAT	GO:0006936~muscle contraction	12	ANXA6, P2RX4, ATP1B1, PKP2, CALD1, PTGS1, ANXA1, ABAT, PAWR, LMOD1, TPM2, TPM1	9.85043
Annotation Cluster 18	Enrichment Score: 3.2975453826545875
Category	Term	Count	Genes	FDR
GOTERM_BP_FAT	GO:0051604~protein maturation	15	AGA, GLG1, AEBP1, NOL3, C3, GAS1, PAWR, MMP14, SERPINH1, CTSL, CASP3, SERPINE2, CPE, TMEM59, THBS1	0.218394
GOTERM_BP_FAT	GO:0010955~negative regulation of protein processing	6	GLG1, NOL3, SERPINE2, TMEM59, GAS1, THBS1	0.34766
GOTERM_BP_FAT	GO:1903318~negative regulation of protein maturation	6	GLG1, NOL3, SERPINE2, TMEM59, GAS1, THBS1	0.34766
GOTERM_BP_FAT	GO:0016485~protein processing	13	GLG1, AEBP1, NOL3, C3, GAS1, PAWR, MMP14, CTSL, CASP3, CPE, SERPINE2, TMEM59, THBS1	0.708646
GOTERM_BP_FAT	GO:0070613~regulation of protein processing	7	GLG1, NOL3, SERPINE2, C3, TMEM59, GAS1, THBS1	1.47444
GOTERM_BP_FAT	GO:1903317~regulation of protein maturation	7	GLG1, NOL3, SERPINE2, C3, TMEM59, GAS1, THBS1	1.59436
GOTERM_BP_FAT	GO:0045861~negative regulation of proteolysis	12	GLG1, SERPINB9, NOL3, SERPINE2, CRYAB, LXN, TMEM59, SERPINB1A, GAS1, TIMP2, THBS1, PLAUR	14.5399
Annotation Cluster 19	Enrichment Score: 3.1412302510313665
Category	Term	Count	Genes	FDR
GOTERM_BP_FAT	GO:0009991~response to extracellular stimulus	19	EGFR, ACADM, RBP1, IMPACT, FSTL1, ARHGAP35, SOD2, ABCG2, VCAM1, LCN2, CTSL, ACSL1, OXCT1, CHSY1, CAT, COL1A1, DAP, NQO1, ACSL4	1.19035
GOTERM_BP_FAT	GO:0031667~response to nutrient levels	18	EGFR, ACADM, RBP1, IMPACT, FSTL1, SOD2, ABCG2, VCAM1, LCN2, CTSL, ACSL1, OXCT1, CHSY1, CAT, COL1A1, DAP, NQO1, ACSL4	1.42521
GOTERM_BP_FAT	GO:0007584~response to nutrient	11	EGFR, VCAM1, ACSL1, RBP1, OXCT1, COL1A1, CAT, NQO1, ACSL4, SOD2, ABCG2	1.46393
Annotation Cluster 20	Enrichment Score: 3.0879152547472315
Category	Term	Count	Genes	FDR
GOTERM_BP_FAT	GO:0051128~regulation of cellular component organization	78	NRP1, IMPACT, LMO4, PDLIM5, WASF2, PRRX1, CSPG4, PAWR, CXCL12, KANK1, DSTN, SERPINE2, ANK3, TMEM59, VPS4A, LMOD1, FAS, PLCB1, ADAM9, EGFR, PID1, KIF14, NOL3, CRYAB, RAB4B, ARPIN, SLC9A3R1, MMP14, NEXN, PALLD, MYADM, VASP, PLAUR, THY1, CTSL, CD81, HSPB1, PDGFRB, TMSB4X, COL1A1, TGFB1I1, TRIOBP, CXCL5, C3, FHL1, ARHGAP35, EPHB3, ITM2C, TPM1, ANXA7, IGF1R, SORBS3, PFN2, SORBS1, CDA, NFATC4, EHD2, FY…	4.56456e-06
GOTERM_BP_FAT	GO:0030029~actin filament-based process	35	TRIOBP, ENAH, CALD1, WASF2, ARHGAP35, PAWR, TPM1, KANK1, DSTN, PFN2, SORBS3, SORBS1, FAT1, CNN1, LMOD1, EHD2, ARHGDIB, SYNPO, MICAL2, ANXA1, S100A10, ARPIN, CSRP1, SLC9A3R1, PALLD, MYADM, VASP, FOXP1, CTSL, LRP1, PKP2, PDGFRA, PDGFRB, TMSB4X, ANTXR1	5.46307e-06
GOTERM_BP_FAT	GO:0030036~actin cytoskeleton organization	32	ENAH, CALD1, WASF2, ARHGAP35, PAWR, TPM1, KANK1, DSTN, PFN2, SORBS3, SORBS1, FAT1, CNN1, LMOD1, EHD2, SYNPO, ARHGDIB, MICAL2, ANXA1, S100A10, ARPIN, CSRP1, SLC9A3R1, PALLD, MYADM, FOXP1, VASP, CTSL, PDGFRA, PDGFRB, TMSB4X, ANTXR1	5.68241e-06
GOTERM_BP_FAT	GO:0007010~cytoskeleton organization	43	TRIOBP, ENAH, TLN2, CALD1, WASF2, ARHGAP35, PAWR, TPM1, KANK1, DSTN, PFN2, SORBS3, SORBS1, FAT1, LMOD1, CNN1, EHD2, ARHGDIB, SYNPO, CHD3, KIF14, CRYAB, MICAL2, MAP1A, ANXA1, S100A10, CSRP1, ARPIN, SLC9A3R1, PALLD, MYADM, VASP, FOXP1, THY1, CTSL, LRP1, TAGLN, PKP2, PDGFRA, PDGFRB, TMSB4X, SH3D19, ANTXR1	0.000768221
GOTERM_BP_FAT	GO:0032956~regulation of actin cytoskeleton organization	19	TRIOBP, WASF2, S100A10, ARHGAP35, ARPIN, TPM1, MYADM, KANK1, VASP, DSTN, CTSL, SORBS3, PFN2, LRP1, PDGFRB, TMSB4X, LMOD1, SYNPO, ARHGDIB	0.0064894
GOTERM_BP_FAT	GO:0032970~regulation of actin filament-based process	20	TRIOBP, WASF2, S100A10, ARHGAP35, ARPIN, TPM1, MYADM, KANK1, VASP, DSTN, CTSL, SORBS3, PFN2, LRP1, PKP2, PDGFRB, TMSB4X, LMOD1, SYNPO, ARHGDIB	0.00828611
GOTERM_BP_FAT	GO:0007015~actin filament organization	19	ENAH, MICAL2, CALD1, WASF2, S100A10, PAWR, ARPIN, TPM1, MYADM, KANK1, VASP, DSTN, SORBS3, PFN2, SORBS1, FAT1, TMSB4X, LMOD1, SYNPO	0.0217572
GOTERM_BP_FAT	GO:0051493~regulation of cytoskeleton organization	21	TRIOBP, MAP1A, WASF2, S100A10, ARHGAP35, ARPIN, NEXN, TPM1, MYADM, KANK1, VASP, DSTN, CTSL, SORBS3, PFN2, LRP1, PDGFRB, TMSB4X, LMOD1, SYNPO, ARHGDIB	0.0820346
GOTERM_BP_FAT	GO:0090066~regulation of anatomical structure size	23	EGFR, NRP1, SLC12A2, PTGS1, ARHGAP35, ARPIN, SLC9A3R1, CXCL12, MMP2, TPM1, MYADM, KANK1, VASP, SOD2, DSTN, P2RX4, ANXA7, PFN2, TGFBR3, TMSB4X, FOXC1, LMOD1, FN1	0.14442
GOTERM_BP_FAT	GO:0051130~positive regulation of cellular component organization	40	TRIOBP, NRP1, CXCL5, C3, WASF2, ARHGAP35, EPHB3, CXCL12, TPM1, DSTN, IGF1R, PFN2, SORBS3, SORBS1, SERPINE2, ANK3, VPS4A, LMOD1, FAS, PLCB1, EHD2, FYCO1, ADAM9, FN1, SYNPO, ANXA1, S100A10, ARPIN, PALLD, MYADM, VASP, PLAUR, LCN2, PLA2G4A, PDGFRB, HSPB1, TCAF2, COL1A1, TGFB1I1, CD14	0.151961
GOTERM_BP_FAT	GO:0031333~negative regulation of protein complex assembly	10	KIF14, PFN2, NOL3, LMO4, IMPACT, TMSB4X, LMOD1, MYADM, TPM1, KANK1	0.318818
GOTERM_BP_FAT	GO:0051129~negative regulation of cellular component organization	25	PID1, KIF14, NRP1, NOL3, IMPACT, LMO4, MAP1A, WASF2, CSPG4, ARPIN, PAWR, MMP14, TPM1, MYADM, ITM2C, KANK1, THY1, PFN2, LRP1, TMEM59, TGFBR3, TMSB4X, NFATC4, ANTXR1, LMOD1	0.609014
GOTERM_BP_FAT	GO:1902589~single-organism organelle organization	46	ATP1B1, ENAH, TLN2, CALD1, WASF2, ARHGAP35, PAWR, TPM1, KANK1, DSTN, PFN2, SORBS3, SORBS1, FAT1, VPS4A, LMOD1, CNN1, EHD2, FYCO1, ARHGDIB, SYNPO, CHD3, KIF14, PID1, NOL3, CRYAB, MICAL2, MAP1A, ANXA1, S100A10, CSRP1, ARPIN, SLC9A3R1, PALLD, MYADM, VASP, FOXP1, CTSL, PLA2G4A, PKP2, PDGFRA, PDGFRB, ABCC4, TMSB4X, ANTXR1, SSNA1	1.86528
GOTERM_BP_FAT	GO:0008154~actin polymerization or depolymerization	11	ENAH, PFN2, MICAL2, TMSB4X, LMOD1, ARPIN, MYADM, TPM1, KANK1, VASP, DSTN	2.28757
GOTERM_BP_FAT	GO:0032535~regulation of cellular component size	16	NRP1, SLC12A2, ARHGAP35, ARPIN, SLC9A3R1, TPM1, MYADM, CXCL12, KANK1, VASP, DSTN, ANXA7, PFN2, TMSB4X, LMOD1, FN1	2.6715
GOTERM_BP_FAT	GO:0051494~negative regulation of cytoskeleton organization	9	PFN2, MAP1A, WASF2, TMSB4X, LMOD1, ARPIN, MYADM, TPM1, KANK1	2.77672
GOTERM_BP_FAT	GO:0030837~negative regulation of actin filament polymerization	6	PFN2, TMSB4X, LMOD1, MYADM, TPM1, KANK1	3.45128
GOTERM_BP_FAT	GO:0008064~regulation of actin polymerization or depolymerization	10	PFN2, TMSB4X, ARHGAP35, LMOD1, ARPIN, MYADM, TPM1, KANK1, VASP, DSTN	3.81386
GOTERM_BP_FAT	GO:0030832~regulation of actin filament length	10	PFN2, TMSB4X, ARHGAP35, LMOD1, ARPIN, MYADM, TPM1, KANK1, VASP, DSTN	3.96475
GOTERM_BP_FAT	GO:0033043~regulation of organelle organization	33	TRIOBP, WASF2, ARHGAP35, TPM1, KANK1, DSTN, IGF1R, PFN2, SORBS3, VPS4A, LMOD1, FAS, PLCB1, FYCO1, ARHGDIB, SYNPO, PID1, TBC1D2B, NOL3, MAP1A, ANXA1, S100A10, ARPIN, NEXN, PALLD, MYADM, VASP, PLAUR, CTSL, PLA2G4A, LRP1, PDGFRB, TMSB4X	4.20327
GOTERM_BP_FAT	GO:0044087~regulation of cellular component biogenesis	25	PDLIM5, IMPACT, LMO4, WASF2, ARHGAP35, EPHB3, TPM1, KANK1, PFN2, SORBS3, VPS4A, FAS, LMOD1, SYNPO, KIF14, NOL3, S100A10, ARPIN, PALLD, MMP14, MYADM, VASP, PKP2, TMSB4X, ANTXR1	5.21784
GOTERM_BP_FAT	GO:0032272~negative regulation of protein polymerization	6	PFN2, TMSB4X, LMOD1, MYADM, TPM1, KANK1	7.6339
GOTERM_BP_FAT	GO:0010638~positive regulation of organelle organization	20	ANXA1, S100A10, ARHGAP35, ARPIN, PALLD, TPM1, VASP, DSTN, PLAUR, IGF1R, PLA2G4A, SORBS3, PFN2, PDGFRB, VPS4A, LMOD1, FAS, PLCB1, FYCO1, SYNPO	9.45423
GOTERM_BP_FAT	GO:0043254~regulation of protein complex assembly	14	KIF14, NOL3, IMPACT, LMO4, ARPIN, PALLD, TPM1, MYADM, KANK1, VASP, PFN2, TMSB4X, LMOD1, FAS	13.7957
GOTERM_BP_FAT	GO:0030833~regulation of actin filament polymerization	8	PFN2, TMSB4X, LMOD1, ARPIN, MYADM, TPM1, KANK1, VASP	20.7158
GOTERM_BP_FAT	GO:0030041~actin filament polymerization	8	PFN2, TMSB4X, LMOD1, ARPIN, MYADM, TPM1, KANK1, VASP	21.3448
GOTERM_BP_FAT	GO:0051495~positive regulation of cytoskeleton organization	9	PFN2, SORBS3, S100A10, LMOD1, ARPIN, TPM1, VASP, DSTN, SYNPO	25.6946
GOTERM_BP_FAT	GO:0031529~ruffle organization	4	PFN2, PALLD, TPM1, KANK1	34.7179
GOTERM_BP_FAT	GO:0044089~positive regulation of cellular component biogenesis	14	WASF2, S100A10, ARHGAP35, ARPIN, EPHB3, PALLD, TPM1, VASP, PFN2, SORBS3, VPS4A, LMOD1, FAS, SYNPO	44.5866
GOTERM_BP_FAT	GO:0032271~regulation of protein polymerization	8	PFN2, TMSB4X, LMOD1, ARPIN, MYADM, TPM1, KANK1, VASP	45.9469
GOTERM_BP_FAT	GO:0010639~negative regulation of organelle organization	11	PID1, PFN2, NOL3, MAP1A, WASF2, TMSB4X, LMOD1, ARPIN, MYADM, TPM1, KANK1	61.1007
GOTERM_BP_FAT	GO:0051258~protein polymerization	8	PFN2, TMSB4X, LMOD1, ARPIN, MYADM, TPM1, KANK1, VASP	89.3895
GOTERM_BP_FAT	GO:0030838~positive regulation of actin filament polymerization	4	PFN2, LMOD1, ARPIN, VASP	98.1687
GOTERM_BP_FAT	GO:0031334~positive regulation of protein complex assembly	6	PFN2, FAS, LMOD1, ARPIN, PALLD, VASP	99.4352
GOTERM_BP_FAT	GO:0032273~positive regulation of protein polymerization	4	PFN2, LMOD1, ARPIN, VASP	99.7828
GOTERM_BP_FAT	GO:0043623~cellular protein complex assembly	11	PFN2, CRYAB, TGFBR3, BCS1L, TMSB4X, LMOD1, ARPIN, MYADM, TPM1, KANK1, VASP	99.9498
GOTERM_BP_FAT	GO:0034622~cellular macromolecular complex assembly	12	PFN2, NOL3, CRYAB, TGFBR3, BCS1L, TMSB4X, LMOD1, ARPIN, MYADM, TPM1, KANK1, VASP	100
Annotation Cluster 21	Enrichment Score: 2.7429482766570166
Category	Term	Count	Genes	FDR
GOTERM_BP_FAT	GO:0048468~cell development	68	ENAH, NRP1, IL6ST, IMPACT, PDLIM5, WASF2, PRRX1, CSPG4, PAWR, CXCL12, MMP2, KANK1, SERPINE2, ANK3, LMOD1, FAS, PLCB1, FNDC3A, TUBB3, EGFR, KIF14, PTPRK, SLC9A3R1, PALLD, NEXN, MYADM, FARP1, VASP, THY1, PDGFRA, HSPB1, SGCD, PDGFRB, CHSY1, FOXC1, COL1A1, TGFB1I1, TRIOBP, CXCL5, COL3A1, ARHGAP35, EPHB3, TIMP2, ITM2C, TPM1, SERPINH1, SLC11A2, IGF1R, FAT1, NFATC4, ACSL4, DCLK1, FN1, COL18A1, GNAO1, FB…	0.00183744
GOTERM_BP_FAT	GO:0007399~nervous system development	67	ENAH, NRP1, IL6ST, IMPACT, LMO4, PDLIM5, PRRX1, CSPG4, CXCL12, MMP2, AKR1C14, KANK1, CKB, CASP3, ATP2B4, SERPINE2, ANK3, BAG3, FAS, PLCB1, GPC1, TUBB3, EGFR, KIF14, PTPRK, SLC9A3R1, PALLD, MMP14, FARP1, VASP, THY1, CTSL, CPE, ABAT, HSPB1, VCAN, FOXC1, CXCL5, CAMK2G, COL3A1, COL2A1, ARHGAP35, GNG12, EPHB3, TIMP2, ITM2B, ITM2C, APLP2, SLC11A2, IGF1R, OXCT1, NFATC4, ACSL4, DCLK1, FN1, CEBPB, GNAO1, …	0.00296028
GOTERM_BP_FAT	GO:0031175~neuron projection development	36	ENAH, NRP1, CXCL5, IMPACT, PDLIM5, PRRX1, CSPG4, ARHGAP35, EPHB3, CXCL12, MMP2, ITM2C, KANK1, SLC11A2, IGF1R, SERPINE2, ANK3, NFATC4, FAS, ACSL4, TUBB3, DCLK1, FN1, EGFR, PTPRK, GNAO1, GAS1, PALLD, FARP1, FOXP1, VASP, THY1, LRP1, HSPB1, JAK2, CDH11	0.00580493
GOTERM_BP_FAT	GO:0000904~cell morphogenesis involved in differentiation	33	TRIOBP, ENAH, NRP1, PDLIM5, ARHGAP35, PAWR, EPHB3, CXCL12, KANK1, SLC11A2, IGF1R, ANK3, FAT1, NFATC4, TUBB3, DCLK1, FN1, COL18A1, KIF14, S100A10, GAS1, SLC9A3R1, PALLD, MYADM, FARP1, FOXP1, VASP, THY1, TGFBR3, COL1A1, TGFB1I1, ANTXR1, CDH11	0.00602474
GOTERM_BP_FAT	GO:0032989~cellular component morphogenesis	46	TRIOBP, ENAH, NRP1, PDLIM5, IMPACT, WASF2, ARHGAP35, PAWR, EPHB3, CXCL12, TPM1, KANK1, SLC11A2, ANXA7, IGF1R, ANK3, FAT1, NFATC4, LMOD1, GPC1, DCLK1, TUBB3, FN1, EGFR, COL18A1, KIF14, PID1, ANXA1, S100A10, GAS1, ARPIN, SLC9A3R1, PALLD, MYADM, FARP1, VASP, FOXP1, THY1, PDGFRA, PDGFRB, ABCC4, TGFBR3, COL1A1, TGFB1I1, ANTXR1, CDH11	0.0128556
GOTERM_BP_FAT	GO:0048666~neuron development	38	ENAH, NRP1, CXCL5, IMPACT, PDLIM5, PRRX1, CSPG4, ARHGAP35, EPHB3, CXCL12, MMP2, ITM2C, KANK1, SLC11A2, IGF1R, SERPINE2, ANK3, NFATC4, FAS, ACSL4, TUBB3, DCLK1, FN1, EGFR, PTPRK, GNAO1, GAS1, SLC9A3R1, PALLD, FARP1, FOXP1, VASP, THY1, SOD2, LRP1, HSPB1, JAK2, CDH11	0.0398626
GOTERM_BP_FAT	GO:0030030~cell projection organization	44	ENAH, NRP1, CXCL5, PDLIM5, IMPACT, WASF2, PRRX1, CSPG4, ARHGAP35, EPHB3, CXCL12, ITM2C, MMP2, TPM1, KANK1, SLC11A2, IGF1R, PFN2, SERPINE2, ANK3, NFATC4, FAS, ACSL4, TUBB3, DCLK1, FN1, EGFR, PTPRK, GNAO1, GAS1, ARPIN, SLC9A3R1, PALLD, FARP1, VASP, FOXP1, THY1, LCN2, LRP1, ABCC4, HSPB1, JAK2, SSNA1, CDH11	0.0747722
GOTERM_BP_FAT	GO:0022008~neurogenesis	49	ENAH, NRP1, IL6ST, LMO4, PDLIM5, IMPACT, PRRX1, CSPG4, CXCL12, MMP2, KANK1, CASP3, SERPINE2, ANK3, FAS, GPC1, TUBB3, EGFR, PTPRK, PALLD, MMP14, SLC9A3R1, VASP, FARP1, THY1, HSPB1, CXCL5, COL3A1, ARHGAP35, TIMP2, EPHB3, ITM2C, SLC11A2, IGF1R, NFATC4, ACSL4, DCLK1, FN1, CEBPB, GNAO1, ANXA1, GAS1, MXRA8, FOXP1, SOD2, LRP1, PBX1, JAK2, CDH11	0.0957106
GOTERM_BP_FAT	GO:0000902~cell morphogenesis	41	TRIOBP, ENAH, NRP1, PDLIM5, IMPACT, WASF2, ARHGAP35, PAWR, EPHB3, CXCL12, TPM1, KANK1, SLC11A2, ANXA7, IGF1R, ANK3, FAT1, NFATC4, DCLK1, TUBB3, FN1, EGFR, COL18A1, KIF14, ANXA1, S100A10, GAS1, ARPIN, SLC9A3R1, PALLD, MYADM, FARP1, VASP, FOXP1, THY1, ABCC4, TGFBR3, COL1A1, TGFB1I1, ANTXR1, CDH11	0.11729
GOTERM_BP_FAT	GO:0030182~neuron differentiation	43	ENAH, NRP1, CXCL5, LMO4, PDLIM5, IMPACT, PRRX1, CSPG4, ARHGAP35, EPHB3, TIMP2, CXCL12, ITM2C, MMP2, KANK1, SLC11A2, IGF1R, CASP3, SERPINE2, ANK3, NFATC4, FAS, ACSL4, TUBB3, DCLK1, FN1, EGFR, PTPRK, GNAO1, CEBPB, GAS1, SLC9A3R1, PALLD, FARP1, VASP, FOXP1, THY1, SOD2, LRP1, HSPB1, JAK2, PBX1, CDH11	0.128067
GOTERM_BP_FAT	GO:0048699~generation of neurons	45	ENAH, NRP1, CXCL5, IL6ST, LMO4, PDLIM5, IMPACT, COL3A1, PRRX1, CSPG4, ARHGAP35, EPHB3, TIMP2, CXCL12, ITM2C, MMP2, KANK1, SLC11A2, IGF1R, CASP3, SERPINE2, ANK3, NFATC4, FAS, ACSL4, TUBB3, DCLK1, FN1, EGFR, PTPRK, GNAO1, CEBPB, GAS1, SLC9A3R1, PALLD, FARP1, VASP, FOXP1, THY1, SOD2, LRP1, HSPB1, JAK2, PBX1, CDH11	0.295389
GOTERM_BP_FAT	GO:0060284~regulation of cell development	32	TRIOBP, NRP1, CXCL5, IL6ST, PDLIM5, IMPACT, COL3A1, PRRX1, CSPG4, ARHGAP35, PAWR, TIMP2, EPHB3, CXCL12, ITM2C, KANK1, IGF1R, SERPINE2, NFATC4, FN1, KIF14, FBN1, S100A10, MYADM, THY1, COL14A1, LRP1, TGFBR3, HSPB1, PBX1, TGFB1I1, COL1A1	1.00863
GOTERM_BP_FAT	GO:0048812~neuron projection morphogenesis	21	EGFR, ENAH, NRP1, IMPACT, PDLIM5, ARHGAP35, GAS1, EPHB3, CXCL12, FOXP1, VASP, FARP1, THY1, SLC11A2, IGF1R, ANK3, NFATC4, DCLK1, TUBB3, CDH11, FN1	2.20563
GOTERM_BP_FAT	GO:0048667~cell morphogenesis involved in neuron differentiation	20	ENAH, NRP1, PDLIM5, ARHGAP35, GAS1, EPHB3, SLC9A3R1, CXCL12, FOXP1, VASP, FARP1, THY1, SLC11A2, IGF1R, ANK3, NFATC4, DCLK1, TUBB3, CDH11, FN1	2.22569
GOTERM_BP_FAT	GO:0006935~chemotaxis	19	ENAH, NRP1, CXCL5, ANXA1, SAA3, ARHGAP35, GAS1, EPHB3, CXCL12, FOXP1, VASP, VCAM1, ANK3, PDGFRA, PDGFRB, HSPB1, THBS1, TUBB3, FN1	5.99669
GOTERM_BP_FAT	GO:0042330~taxis	19	ENAH, NRP1, CXCL5, ANXA1, SAA3, ARHGAP35, GAS1, EPHB3, CXCL12, FOXP1, VASP, VCAM1, ANK3, PDGFRA, PDGFRB, HSPB1, THBS1, TUBB3, FN1	6.1929
GOTERM_BP_FAT	GO:0061564~axon development	17	ENAH, NRP1, ARHGAP35, GAS1, EPHB3, MMP2, CXCL12, FOXP1, VASP, THY1, IGF1R, ANK3, JAK2, DCLK1, TUBB3, CDH11, FN1	6.40527
GOTERM_BP_FAT	GO:0032990~cell part morphogenesis	26	ENAH, NRP1, IMPACT, PDLIM5, WASF2, ARHGAP35, EPHB3, CXCL12, KANK1, SLC11A2, IGF1R, ANK3, NFATC4, TUBB3, DCLK1, FN1, PID1, EGFR, ARPIN, GAS1, FOXP1, VASP, FARP1, THY1, ABCC4, CDH11	7.66616
GOTERM_BP_FAT	GO:0048858~cell projection morphogenesis	25	ENAH, NRP1, PDLIM5, IMPACT, WASF2, ARHGAP35, EPHB3, CXCL12, KANK1, SLC11A2, IGF1R, ANK3, NFATC4, TUBB3, DCLK1, FN1, EGFR, GAS1, ARPIN, FARP1, VASP, FOXP1, THY1, ABCC4, CDH11	9.15365
GOTERM_BP_FAT	GO:0031344~regulation of cell projection organization	21	NRP1, CXCL5, PDLIM5, WASF2, PRRX1, CSPG4, ARHGAP35, ARPIN, EPHB3, ITM2C, CXCL12, KANK1, THY1, LCN2, IGF1R, PFN2, LRP1, SERPINE2, HSPB1, NFATC4, FN1	11.461
GOTERM_BP_FAT	GO:0007411~axon guidance	10	ENAH, NRP1, ANK3, ARHGAP35, GAS1, EPHB3, CXCL12, VASP, TUBB3, FOXP1	14.6507
GOTERM_BP_FAT	GO:0097485~neuron projection guidance	10	ENAH, NRP1, ANK3, ARHGAP35, GAS1, EPHB3, CXCL12, VASP, TUBB3, FOXP1	15.0513
GOTERM_BP_FAT	GO:0007409~axonogenesis	15	ENAH, NRP1, ARHGAP35, GAS1, EPHB3, CXCL12, FOXP1, VASP, THY1, IGF1R, ANK3, DCLK1, TUBB3, CDH11, FN1	16.9402
GOTERM_BP_FAT	GO:0010975~regulation of neuron projection development	17	NRP1, CXCL5, PDLIM5, PRRX1, CSPG4, ARHGAP35, EPHB3, ITM2C, CXCL12, KANK1, THY1, IGF1R, LRP1, SERPINE2, HSPB1, NFATC4, FN1	18.2754
GOTERM_BP_FAT	GO:0045664~regulation of neuron differentiation	20	NRP1, CXCL5, IMPACT, PDLIM5, PRRX1, CSPG4, ARHGAP35, TIMP2, EPHB3, ITM2C, CXCL12, KANK1, THY1, IGF1R, LRP1, SERPINE2, HSPB1, PBX1, NFATC4, FN1	27.5885
GOTERM_BP_FAT	GO:0050921~positive regulation of chemotaxis	7	NRP1, CXCL5, PDGFRB, HSPB1, THBS1, CXCL12, FN1	33.6609
GOTERM_BP_FAT	GO:0060326~cell chemotaxis	10	VCAM1, NRP1, CXCL5, PDGFRA, ANXA1, SAA3, PDGFRB, HSPB1, THBS1, CXCL12	41.9516
GOTERM_BP_FAT	GO:0051960~regulation of nervous system development	24	KIF14, NRP1, CXCL5, IL6ST, IMPACT, PDLIM5, COL3A1, PRRX1, CSPG4, ARHGAP35, TIMP2, EPHB3, ITM2C, CXCL12, KANK1, THY1, IGF1R, LRP1, SERPINE2, CPE, HSPB1, PBX1, NFATC4, FN1	43.1432
GOTERM_BP_FAT	GO:0050767~regulation of neurogenesis	22	NRP1, CXCL5, IL6ST, IMPACT, PDLIM5, COL3A1, PRRX1, CSPG4, ARHGAP35, TIMP2, EPHB3, ITM2C, CXCL12, KANK1, THY1, IGF1R, LRP1, SERPINE2, HSPB1, PBX1, NFATC4, FN1	43.5539
GOTERM_BP_FAT	GO:0050920~regulation of chemotaxis	8	NRP1, CXCL5, PDGFRA, PDGFRB, HSPB1, THBS1, CXCL12, FN1	58.7044
GOTERM_BP_FAT	GO:0010720~positive regulation of cell development	16	TRIOBP, NRP1, CXCL5, IL6ST, IMPACT, S100A10, ARHGAP35, TIMP2, MYADM, CXCL12, IGF1R, SERPINE2, HSPB1, COL1A1, TGFB1I1, FN1	72.1076
GOTERM_BP_FAT	GO:0045666~positive regulation of neuron differentiation	10	IGF1R, NRP1, SERPINE2, CXCL5, IMPACT, HSPB1, ARHGAP35, TIMP2, CXCL12, FN1	98.291
GOTERM_BP_FAT	GO:0031346~positive regulation of cell projection organization	10	LCN2, IGF1R, NRP1, SERPINE2, CXCL5, WASF2, HSPB1, ARHGAP35, CXCL12, FN1	98.3725
GOTERM_BP_FAT	GO:0010976~positive regulation of neuron projection development	8	IGF1R, NRP1, SERPINE2, CXCL5, HSPB1, ARHGAP35, CXCL12, FN1	99.2172
GOTERM_BP_FAT	GO:0050769~positive regulation of neurogenesis	11	IGF1R, NRP1, SERPINE2, CXCL5, IL6ST, IMPACT, HSPB1, ARHGAP35, TIMP2, CXCL12, FN1	99.8049
GOTERM_BP_FAT	GO:0051962~positive regulation of nervous system development	12	IGF1R, NRP1, SERPINE2, CXCL5, IL6ST, IMPACT, HSPB1, ARHGAP35, TIMP2, EPHB3, CXCL12, FN1	99.9095
Annotation Cluster 22	Enrichment Score: 2.680238466756396
Category	Term	Count	Genes	FDR
GOTERM_BP_FAT	GO:0055093~response to hyperoxia	5	PDGFRB, COL1A1, FAS, CAT, SOD2	1.2691
GOTERM_BP_FAT	GO:0036296~response to increased oxygen levels	5	PDGFRB, COL1A1, FAS, CAT, SOD2	1.2691
GOTERM_BP_FAT	GO:0033273~response to vitamin	6	EGFR, RBP1, COL1A1, CAT, SOD2, ABCG2	31.543
Annotation Cluster 23	Enrichment Score: 2.6557247490302114
Category	Term	Count	Genes	FDR
GOTERM_BP_FAT	GO:0080134~regulation of response to stress	38	XDH, ATP1B1, CXCL5, C3, IMPACT, PRRX1, MAPKAPK2, PAWR, CXCL12, MMP2, KANK1, IGF1R, PTGIS, ATP2B4, SERPINE2, TGM2, THBS1, PLCB1, GLRX, EGFR, NOL3, MAP1A, IL1RN, ANXA1, FOXP1, SOD2, SERPINB9, EYA4, PLA2G4A, CHID1, PDGFRA, FABP4, ABAT, RIPK2, TGFBR3, HSPB1, JAK2, CD14	0.243439
GOTERM_BP_FAT	GO:0033554~cellular response to stress	44	XDH, ATP1B1, CYP1B1, IMPACT, PRRX1, PDIA6, MAPKAPK2, PAWR, CXCL12, MMP2, TPM1, IGF1R, GSTM2, CASP3, PTGIS, NFATC4, DAP, FAS, THBS1, PLCB1, FAM129A, PHLDA3, GLRX, EGFR, PTPRK, CRIP1, CEBPB, NOL3, CRYAB, MAP1A, IL1RN, ANXA1, MACROD1, SOD2, LCN2, EYA4, CTSL, PDGFRA, TGFBR3, RIPK2, HSPB1, JAK2, MGST1, IFI204	4.38613
GOTERM_BP_FAT	GO:0080135~regulation of cellular response to stress	16	EGFR, XDH, NOL3, IMPACT, IL1RN, PRRX1, PAWR, CXCL12, SOD2, EYA4, IGF1R, HSPB1, TGFBR3, RIPK2, PLCB1, GLRX	49.1091
Annotation Cluster 24	Enrichment Score: 2.6304397133276716
Category	Term	Count	Genes	FDR
GOTERM_BP_FAT	GO:0009790~embryo development	39	ATP1B1, ENAH, NRP1, LMO4, PRRX1, ARHGAP35, COL2A1, PRRX2, MMP2, TPM1, APLP2, VCAM1, COL12A1, PLCD1, ACSL4, PLCB1, FN1, EGFR, CEBPB, MICAL2, IL1RN, MUSTN1, GAS1, SLC9A3R1, MMP14, MYADM, COL5A1, FOXP1, VASP, ABCG2, EYA4, PDGFRA, PDGFRB, TGFBR3, FOXC1, PBX1, COL1A1, TGFB1I1, RCN1	0.0651303
GOTERM_BP_FAT	GO:0048598~embryonic morphogenesis	24	ENAH, MICAL2, LMO4, IL1RN, PRRX1, COL2A1, ARHGAP35, PRRX2, GAS1, MUSTN1, SLC9A3R1, MMP14, MYADM, MMP2, COL5A1, VASP, VCAM1, EYA4, PDGFRA, COL12A1, PBX1, FOXC1, TGFB1I1, FN1	0.813193
GOTERM_BP_FAT	GO:0009792~embryo development ending in birth or egg hatching	25	ENAH, ATP1B1, LMO4, PRRX1, ARHGAP35, COL2A1, PRRX2, TPM1, VCAM1, PLCD1, ACSL4, EGFR, CEBPB, GAS1, MMP14, VASP, FOXP1, ABCG2, PDGFRA, TGFBR3, PDGFRB, FOXC1, PBX1, COL1A1, RCN1	2.12369
GOTERM_BP_FAT	GO:0043009~chordate embryonic development	23	EGFR, ENAH, ATP1B1, CEBPB, LMO4, PRRX1, COL2A1, ARHGAP35, PRRX2, GAS1, MMP14, TPM1, FOXP1, VASP, VCAM1, PDGFRA, PDGFRB, TGFBR3, PBX1, FOXC1, PLCD1, COL1A1, RCN1	8.23812
GOTERM_BP_FAT	GO:0048568~embryonic organ development	16	EGFR, CEBPB, MICAL2, PRRX1, COL2A1, GAS1, PRRX2, MMP14, SLC9A3R1, VCAM1, EYA4, PDGFRA, PDGFRB, PBX1, FOXC1, PLCD1	26.8231
GOTERM_BP_FAT	GO:0001701~in utero embryonic development	12	EGFR, VCAM1, ATP1B1, CEBPB, PDGFRA, PDGFRB, TGFBR3, PLCD1, FOXC1, TPM1, RCN1, FOXP1	92.7964
Annotation Cluster 25	Enrichment Score: 2.539771852192712
Category	Term	Count	Genes	FDR
GOTERM_BP_FAT	GO:0070482~response to oxygen levels	16	ATP1B1, NOL3, CRYAB, CAMK2G, MMP14, MMP2, CXCL12, SOD2, VCAM1, PTGIS, PDGFRB, TGFBR3, ABAT, CAT, FAS, COL1A1	2.30703
GOTERM_BP_FAT	GO:0001666~response to hypoxia	13	VCAM1, ATP1B1, PTGIS, NOL3, CRYAB, CAMK2G, ABAT, TGFBR3, CAT, MMP14, CXCL12, MMP2, SOD2	7.20443
GOTERM_BP_FAT	GO:0036293~response to decreased oxygen levels	13	VCAM1, ATP1B1, PTGIS, NOL3, CRYAB, CAMK2G, ABAT, TGFBR3, CAT, MMP14, CXCL12, MMP2, SOD2	8.87581
Annotation Cluster 26	Enrichment Score: 2.528338531921449
Category	Term	Count	Genes	FDR
GOTERM_BP_FAT	GO:0072593~reactive oxygen species metabolic process	17	EGFR, PID1, XDH, CYP1B1, CRYAB, SOD2, P2RX4, ATP2B4, PTGIS, RIPK3, PDGFRB, JAK2, CAT, THBS1, NQO1, PON3, NQO2	0.00290994
GOTERM_BP_FAT	GO:2000377~regulation of reactive oxygen species metabolic process	14	EGFR, PID1, XDH, CYP1B1, CRYAB, SOD2, ATP2B4, PTGIS, RIPK3, PDGFRB, JAK2, THBS1, PON3, NQO2	0.00819029
GOTERM_BP_FAT	GO:2000379~positive regulation of reactive oxygen species metabolic process	10	EGFR, XDH, PID1, CYP1B1, RIPK3, PDGFRB, JAK2, THBS1, SOD2, NQO2	0.0441251
GOTERM_BP_FAT	GO:0006809~nitric oxide biosynthetic process	7	EGFR, P2RX4, ATP2B4, PTGIS, CYP1B1, JAK2, SOD2	1.59436
GOTERM_BP_FAT	GO:0046209~nitric oxide metabolic process	7	EGFR, P2RX4, ATP2B4, PTGIS, CYP1B1, JAK2, SOD2	1.99892
GOTERM_BP_FAT	GO:2001057~reactive nitrogen species metabolic process	7	EGFR, P2RX4, ATP2B4, PTGIS, CYP1B1, JAK2, SOD2	2.65336
GOTERM_BP_FAT	GO:1903409~reactive oxygen species biosynthetic process	7	EGFR, P2RX4, ATP2B4, PTGIS, CYP1B1, JAK2, SOD2	8.07614
GOTERM_BP_FAT	GO:0045428~regulation of nitric oxide biosynthetic process	5	EGFR, ATP2B4, PTGIS, JAK2, SOD2	28.5443
GOTERM_BP_FAT	GO:1903426~regulation of reactive oxygen species biosynthetic process	5	EGFR, ATP2B4, PTGIS, JAK2, SOD2	55.655
GOTERM_BP_FAT	GO:1904407~positive regulation of nitric oxide metabolic process	3	EGFR, JAK2, SOD2	96.8576
GOTERM_BP_FAT	GO:0045429~positive regulation of nitric oxide biosynthetic process	3	EGFR, JAK2, SOD2	96.8576
GOTERM_BP_FAT	GO:1903428~positive regulation of reactive oxygen species biosynthetic process	3	EGFR, JAK2, SOD2	99.1016
GOTERM_BP_FAT	GO:0042311~vasodilation	3	EGFR, P2RX4, SOD2	99.9381
Annotation Cluster 27	Enrichment Score: 2.421206376662341
Category	Term	Count	Genes	FDR
GOTERM_BP_FAT	GO:0044712~single-organism catabolic process	29	XDH, ACADSB, CYP1B1, ECH1, GM2A, ESD, ECHS1, MMP2, AUH, ATP2B4, CSAD, OXCT1, CDA, IDH1, GLO1, PLCD1, PLCB1, NT5C, ACADM, CBR3, MMP14, CPT1A, PLA2G4A, BLVRB, AOX1, ALDH2, ABAT, OAT, PON3	0.0356655
GOTERM_BP_FAT	GO:0044282~small molecule catabolic process	16	ACADSB, ECH1, ACADM, ESD, ECHS1, CBR3, CPT1A, AUH, ATP2B4, CSAD, OXCT1, ALDH2, ABAT, GLO1, OAT, PON3	0.0873787
GOTERM_BP_FAT	GO:0006631~fatty acid metabolic process	17	ACADSB, CYP1B1, ECH1, ACADM, C3, PTGS1, ANXA1, ACOT1, ECHS1, CYB5A, CPT1A, AUH, PLA2G4A, ACSL1, PTGIS, FABP4, ACSL4	0.806189
GOTERM_BP_FAT	GO:0046395~carboxylic acid catabolic process	11	ACADSB, ECH1, ACADM, ATP2B4, CSAD, ABAT, ECHS1, OAT, PON3, CPT1A, AUH	0.899902
GOTERM_BP_FAT	GO:0016054~organic acid catabolic process	11	ACADSB, ECH1, ACADM, ATP2B4, CSAD, ABAT, ECHS1, OAT, PON3, CPT1A, AUH	2.28757
GOTERM_BP_FAT	GO:0044242~cellular lipid catabolic process	10	PLA2G4A, ACADSB, ECH1, ACADM, CYP1B1, GM2A, ECHS1, PLCB1, CPT1A, AUH	5.9498
GOTERM_BP_FAT	GO:0072329~monocarboxylic acid catabolic process	7	ACADSB, ECH1, ACADM, ECHS1, PON3, CPT1A, AUH	8.48731
GOTERM_BP_FAT	GO:0006635~fatty acid beta-oxidation	6	ACADSB, ECH1, ACADM, ECHS1, CPT1A, AUH	9.74769
GOTERM_BP_FAT	GO:0016042~lipid catabolic process	12	PLA2G4A, ACADSB, ECH1, ACADM, CYP1B1, GM2A, ECHS1, IDH1, PLCD1, PLCB1, CPT1A, AUH	11.177
GOTERM_BP_FAT	GO:0009062~fatty acid catabolic process	6	ACADSB, ECH1, ACADM, ECHS1, CPT1A, AUH	19.8422
GOTERM_BP_FAT	GO:0009063~cellular amino acid catabolic process	5	ATP2B4, CSAD, ABAT, OAT, AUH	36.8258
GOTERM_BP_FAT	GO:0019395~fatty acid oxidation	6	ACADSB, ECH1, ACADM, ECHS1, CPT1A, AUH	37.0264
GOTERM_BP_FAT	GO:0034440~lipid oxidation	6	ACADSB, ECH1, ACADM, ECHS1, CPT1A, AUH	39.2859
GOTERM_BP_FAT	GO:0030258~lipid modification	7	ACADSB, ECH1, ACADM, ECHS1, CPT1A, AUH, TMEM55A	86.096
GOTERM_BP_FAT	GO:0006520~cellular amino acid metabolic process	6	ATP2B4, CSAD, GFPT2, ABAT, OAT, AUH	99.4352
Annotation Cluster 28	Enrichment Score: 2.3596373568689195
Category	Term	Count	Genes	FDR
GOTERM_BP_FAT	GO:0042592~homeostatic process	55	STEAP4, ATP1B1, IL6ST, 1600014C10RIK, PDIA6, ANPEP, CKB, CASP3, ATP2B4, ANK3, FAS, PLCB1, EGFR, ACADM, NOL3, SLC9A3R1, THY1, RIPK3, PDGFRA, HSPB1, PDGFRB, ABAT, FOXC1, XDH, ACADSB, CXCL5, FHL1, COL2A1, FTH1, APLP2, SLC11A2, VCAM1, ANXA6, IGF1R, ANXA7, OXCT1, TGM2, PLCD1, GLRX, SLC12A2, MAP1A, FBN1, IL1RN, ANXA1, AMPD3, SOD2, LCN2, P2RX4, PLA2G4A, COL14A1, PKP2, FABP4, TGFBR3, JAK2, CP	0.00315191
GOTERM_BP_FAT	GO:0048878~chemical homeostasis	35	STEAP4, ACADSB, ATP1B1, IL6ST, FHL1, 1600014C10RIK, ANPEP, FTH1, APLP2, CKB, SLC11A2, VCAM1, ANXA6, IGF1R, ANXA7, ATP2B4, ANK3, OXCT1, TGM2, PLCD1, EGFR, ACADM, NOL3, FBN1, SLC9A3R1, THY1, SOD2, LCN2, P2RX4, PLA2G4A, PKP2, PDGFRA, FABP4, JAK2, CP	0.522692
GOTERM_BP_FAT	GO:0055065~metal ion homeostasis	23	EGFR, STEAP4, ATP1B1, NOL3, IL6ST, 1600014C10RIK, ANPEP, FTH1, APLP2, SOD2, THY1, SLC11A2, LCN2, ANXA6, P2RX4, ANXA7, ATP2B4, ANK3, PDGFRA, TGM2, PLCD1, JAK2, CP	0.574688
GOTERM_BP_FAT	GO:0050801~ion homeostasis	26	STEAP4, ATP1B1, IL6ST, FHL1, 1600014C10RIK, ANPEP, FTH1, APLP2, CKB, SLC11A2, ANXA6, ANXA7, ATP2B4, ANK3, TGM2, PLCD1, EGFR, NOL3, SLC9A3R1, SOD2, THY1, LCN2, P2RX4, PDGFRA, JAK2, CP	0.680243
GOTERM_BP_FAT	GO:0098771~inorganic ion homeostasis	25	STEAP4, ATP1B1, IL6ST, 1600014C10RIK, ANPEP, FTH1, APLP2, CKB, SLC11A2, ANXA6, ANXA7, ATP2B4, ANK3, TGM2, PLCD1, EGFR, NOL3, SLC9A3R1, SOD2, THY1, LCN2, P2RX4, PDGFRA, JAK2, CP	0.748616
GOTERM_BP_FAT	GO:0055080~cation homeostasis	23	EGFR, STEAP4, ATP1B1, NOL3, IL6ST, 1600014C10RIK, ANPEP, FTH1, APLP2, SOD2, THY1, SLC11A2, LCN2, ANXA6, P2RX4, ANXA7, ATP2B4, ANK3, PDGFRA, TGM2, PLCD1, JAK2, CP	2.89603
GOTERM_BP_FAT	GO:0019725~cellular homeostasis	26	ATP1B1, IL6ST, PDIA6, 1600014C10RIK, FTH1, APLP2, CKB, VCAM1, SLC11A2, ANXA6, ANXA7, IGF1R, ATP2B4, OXCT1, TGM2, PLCD1, GLRX, NOL3, SLC12A2, SLC9A3R1, THY1, LCN2, P2RX4, PDGFRA, JAK2, CP	7.72939
GOTERM_BP_FAT	GO:0006873~cellular ion homeostasis	20	ATP1B1, NOL3, IL6ST, 1600014C10RIK, SLC9A3R1, FTH1, APLP2, CKB, THY1, SLC11A2, ANXA6, LCN2, P2RX4, ANXA7, ATP2B4, PDGFRA, TGM2, JAK2, PLCD1, CP	8.92496
GOTERM_BP_FAT	GO:0006875~cellular metal ion homeostasis	18	ATP1B1, NOL3, IL6ST, 1600014C10RIK, FTH1, APLP2, THY1, SLC11A2, ANXA6, LCN2, P2RX4, ANXA7, ATP2B4, PDGFRA, TGM2, JAK2, PLCD1, CP	9.62325
GOTERM_BP_FAT	GO:0055082~cellular chemical homeostasis	23	ATP1B1, NOL3, IL6ST, 1600014C10RIK, SLC9A3R1, FTH1, APLP2, CKB, THY1, SLC11A2, LCN2, VCAM1, ANXA6, IGF1R, P2RX4, ANXA7, ATP2B4, OXCT1, PDGFRA, TGM2, PLCD1, JAK2, CP	12.8882
GOTERM_BP_FAT	GO:0030003~cellular cation homeostasis	18	ATP1B1, NOL3, IL6ST, 1600014C10RIK, FTH1, APLP2, THY1, SLC11A2, ANXA6, LCN2, P2RX4, ANXA7, ATP2B4, PDGFRA, TGM2, JAK2, PLCD1, CP	27.5845
GOTERM_BP_FAT	GO:0072507~divalent inorganic cation homeostasis	15	EGFR, ATP1B1, NOL3, IL6ST, 1600014C10RIK, THY1, ANXA6, ANXA7, P2RX4, ATP2B4, ANK3, PDGFRA, TGM2, JAK2, PLCD1	30.0352
GOTERM_BP_FAT	GO:0006874~cellular calcium ion homeostasis	13	ATP1B1, NOL3, IL6ST, 1600014C10RIK, THY1, ANXA6, ANXA7, P2RX4, ATP2B4, TGM2, PDGFRA, PLCD1, JAK2	54.2219
GOTERM_BP_FAT	GO:0055074~calcium ion homeostasis	13	ATP1B1, NOL3, IL6ST, 1600014C10RIK, THY1, ANXA6, ANXA7, P2RX4, ATP2B4, TGM2, PDGFRA, PLCD1, JAK2	61.8032
GOTERM_BP_FAT	GO:0072503~cellular divalent inorganic cation homeostasis	13	ATP1B1, NOL3, IL6ST, 1600014C10RIK, THY1, ANXA6, ANXA7, P2RX4, ATP2B4, TGM2, PDGFRA, PLCD1, JAK2	65.3932
GOTERM_BP_FAT	GO:0051480~regulation of cytosolic calcium ion concentration	8	P2RX4, NOL3, IL6ST, PDGFRA, TGM2, PLCD1, JAK2, THY1	99.6988
GOTERM_BP_FAT	GO:0007204~positive regulation of cytosolic calcium ion concentration	7	P2RX4, NOL3, PDGFRA, TGM2, PLCD1, JAK2, THY1	99.9274
Annotation Cluster 29	Enrichment Score: 2.309113310272083
Category	Term	Count	Genes	FDR
GOTERM_BP_FAT	GO:0007155~cell adhesion	70	ATP1B1, TLN2, IL6ST, PDLIM5, WASF2, LMO7, PDIA6, PAWR, CXCL12, MMP2, KANK1, CASP3, SERPINE2, ANK3, BAG3, COL12A1, FAS, PLCB1, FNDC3A, ADAM9, EGFR, KIF14, PTPRK, MMP14, MYADM, VASP, THY1, RIPK3, PDGFRA, ABAT, HSPB1, RIPK2, VCAN, COL1A1, TRIOBP, CYP1B1, EPDR1, LRRC32, COL3A1, EPHB3, APBB1IP, TPM1, MYL9, VCAM1, SORBS3, SORBS1, FAT1, TGM2, IDH1, EMB, THBS1, FN1, TES, COL18A1, CEBPB, LPP, FBN1, IL1RN,…	4.4198e-11
GOTERM_BP_FAT	GO:0022610~biological adhesion	70	ATP1B1, TLN2, IL6ST, PDLIM5, WASF2, LMO7, PDIA6, PAWR, CXCL12, MMP2, KANK1, CASP3, SERPINE2, ANK3, BAG3, COL12A1, FAS, PLCB1, FNDC3A, ADAM9, EGFR, KIF14, PTPRK, MMP14, MYADM, VASP, THY1, RIPK3, PDGFRA, ABAT, HSPB1, RIPK2, VCAN, COL1A1, TRIOBP, CYP1B1, EPDR1, LRRC32, COL3A1, EPHB3, APBB1IP, TPM1, MYL9, VCAM1, SORBS3, SORBS1, FAT1, TGM2, IDH1, EMB, THBS1, FN1, TES, COL18A1, CEBPB, LPP, FBN1, IL1RN,…	6.38933e-11
GOTERM_BP_FAT	GO:0098602~single organism cell adhesion	39	TRIOBP, CYP1B1, IL6ST, LRRC32, LMO7, PDIA6, PAWR, EPHB3, CXCL12, APBB1IP, KANK1, MYL9, VCAM1, CASP3, SERPINE2, ANK3, FAT1, FAS, FNDC3A, ADAM9, FN1, EGFR, KIF14, CEBPB, IL1RN, ANXA1, S100A10, CSRP1, MYADM, FOXP1, THY1, PKP2, PDGFRA, RIPK3, ABAT, RIPK2, HSPB1, JAK2, ANTXR1	5.85333e-06
GOTERM_BP_FAT	GO:0030155~regulation of cell adhesion	34	TRIOBP, CYP1B1, IL6ST, LRRC32, LMO7, PAWR, EPHB3, CXCL12, MMP2, TPM1, APBB1IP, KANK1, VCAM1, CASP3, SERPINE2, ANK3, TGM2, THBS1, ADAM9, FN1, KIF14, CEBPB, IL1RN, ANXA1, S100A10, NID1, MMP14, MYADM, THY1, RIPK3, RIPK2, ABAT, JAK2, COL1A1	1.04533e-05
GOTERM_BP_FAT	GO:0016337~single organismal cell-cell adhesion	32	CYP1B1, IL6ST, LRRC32, LMO7, PDIA6, PAWR, CXCL12, APBB1IP, MYL9, VCAM1, CASP3, SERPINE2, ANK3, FAT1, FAS, FNDC3A, ADAM9, EGFR, CEBPB, IL1RN, ANXA1, CSRP1, MYADM, FOXP1, THY1, PKP2, PDGFRA, RIPK3, ABAT, RIPK2, HSPB1, JAK2	0.00293468
GOTERM_BP_FAT	GO:0007162~negative regulation of cell adhesion	17	CYP1B1, CEBPB, LRRC32, IL1RN, ANXA1, PAWR, MMP14, MYADM, MMP2, CXCL12, KANK1, CASP3, SERPINE2, ABAT, JAK2, COL1A1, THBS1	0.00363323
GOTERM_BP_FAT	GO:0098609~cell-cell adhesion	40	CYP1B1, IL6ST, LRRC32, PDLIM5, WASF2, LMO7, PDIA6, PAWR, CXCL12, APBB1IP, MYL9, VCAM1, CASP3, SERPINE2, ANK3, FAT1, BAG3, IDH1, FAS, FNDC3A, ADAM9, TES, EGFR, CEBPB, IL1RN, ANXA1, GLOD4, CSRP1, MYADM, VASP, FOXP1, THY1, PKP2, PDGFRA, RIPK3, ABAT, RIPK2, HSPB1, JAK2, CDH11	0.00834818
GOTERM_BP_FAT	GO:0045785~positive regulation of cell adhesion	19	TRIOBP, IL6ST, ANXA1, S100A10, NID1, PAWR, APBB1IP, TPM1, MYADM, CXCL12, THY1, VCAM1, ANK3, TGM2, RIPK2, JAK2, THBS1, ADAM9, FN1	0.0675127
GOTERM_BP_FAT	GO:0022408~negative regulation of cell-cell adhesion	11	CASP3, CEBPB, SERPINE2, LRRC32, IL1RN, ANXA1, ABAT, JAK2, PAWR, MYADM, CXCL12	0.346093
GOTERM_BP_FAT	GO:0022407~regulation of cell-cell adhesion	18	CEBPB, LRRC32, IL6ST, IL1RN, ANXA1, PAWR, EPHB3, MYADM, CXCL12, THY1, VCAM1, CASP3, SERPINE2, ANK3, RIPK3, RIPK2, ABAT, JAK2	0.348775
GOTERM_BP_FAT	GO:0001775~cell activation	31	IL6ST, LRRC32, PDIA6, PAWR, CXCL12, APBB1IP, MYL9, VCAM1, CASP3, SERPINE2, FAS, THBS1, PLCB1, ADAM9, FN1, EGFR, CEBPB, ANXA1, CSRP1, MMP14, FOXP1, THY1, CD81, PDGFRA, RIPK3, PDGFRB, RIPK2, HSPB1, ABAT, JAK2, IFI204	0.540308
GOTERM_BP_FAT	GO:0050865~regulation of cell activation	21	CEBPB, LRRC32, IL6ST, LMO4, ANXA1, PAWR, MMP14, THY1, VCAM1, CASP3, SERPINE2, CD81, PDGFRA, RIPK3, PDGFRB, RIPK2, ABAT, JAK2, FAS, THBS1, IFI204	0.644728
GOTERM_BP_FAT	GO:0002682~regulation of immune system process	35	ATP1B1, ENAH, CXCL5, RBP1, IL6ST, C3, LRRC32, COL3A1, MAPKAPK2, PAWR, CXCL12, MMP2, VCAM1, CASP3, MEIS2, FAS, THBS1, PLCB1, CEBPB, MAP1A, FBN1, ANXA1, MMP14, VASP, FOXP1, THY1, SERPINB9, CD81, RIPK3, RIPK2, FOXC1, JAK2, CD14, TMEM176B, IFI204	4.46253
GOTERM_BP_FAT	GO:0042098~T cell proliferation	10	VCAM1, CASP3, CEBPB, IL6ST, LRRC32, RIPK3, ANXA1, RIPK2, PAWR, CXCL12	6.60948
GOTERM_BP_FAT	GO:0042129~regulation of T cell proliferation	9	VCAM1, CASP3, CEBPB, IL6ST, LRRC32, RIPK3, ANXA1, RIPK2, PAWR	8.22025
GOTERM_BP_FAT	GO:0050866~negative regulation of cell activation	9	CASP3, CEBPB, SERPINE2, LRRC32, PDGFRA, ANXA1, ABAT, PAWR, FAS	12.0211
GOTERM_BP_FAT	GO:0002683~negative regulation of immune system process	15	CEBPB, LRRC32, COL3A1, FBN1, ANXA1, PAWR, CXCL12, THY1, SERPINB9, CASP3, MEIS2, FAS, THBS1, PLCB1, TMEM176B	12.2639
GOTERM_BP_FAT	GO:0050670~regulation of lymphocyte proliferation	10	VCAM1, CASP3, CEBPB, IL6ST, LRRC32, CD81, RIPK3, ANXA1, RIPK2, PAWR	13.7582
GOTERM_BP_FAT	GO:0032944~regulation of mononuclear cell proliferation	10	VCAM1, CASP3, CEBPB, IL6ST, LRRC32, CD81, RIPK3, ANXA1, RIPK2, PAWR	14.6507
GOTERM_BP_FAT	GO:0070663~regulation of leukocyte proliferation	10	VCAM1, CASP3, CEBPB, IL6ST, LRRC32, CD81, RIPK3, ANXA1, RIPK2, PAWR	18.0622
GOTERM_BP_FAT	GO:1903037~regulation of leukocyte cell-cell adhesion	11	VCAM1, CASP3, CEBPB, IL6ST, LRRC32, RIPK3, ANXA1, RIPK2, PAWR, CXCL12, THY1	36.6076
GOTERM_BP_FAT	GO:0046651~lymphocyte proliferation	11	VCAM1, CASP3, CEBPB, IL6ST, LRRC32, CD81, RIPK3, ANXA1, RIPK2, PAWR, CXCL12	39.2876
GOTERM_BP_FAT	GO:0002694~regulation of leukocyte activation	15	CEBPB, LRRC32, IL6ST, ANXA1, PAWR, MMP14, THY1, VCAM1, CASP3, CD81, RIPK3, RIPK2, FAS, THBS1, IFI204	39.4625
GOTERM_BP_FAT	GO:0032943~mononuclear cell proliferation	11	VCAM1, CASP3, CEBPB, IL6ST, LRRC32, CD81, RIPK3, ANXA1, RIPK2, PAWR, CXCL12	40.1973
GOTERM_BP_FAT	GO:1903038~negative regulation of leukocyte cell-cell adhesion	6	CASP3, CEBPB, LRRC32, ANXA1, PAWR, CXCL12	42.7236
GOTERM_BP_FAT	GO:0050867~positive regulation of cell activation	11	VCAM1, IL6ST, CD81, ANXA1, PDGFRB, RIPK2, JAK2, THBS1, MMP14, THY1, IFI204	45.2299
GOTERM_BP_FAT	GO:0070661~leukocyte proliferation	11	VCAM1, CASP3, CEBPB, IL6ST, LRRC32, CD81, RIPK3, ANXA1, RIPK2, PAWR, CXCL12	48.5014
GOTERM_BP_FAT	GO:0051249~regulation of lymphocyte activation	13	CEBPB, LRRC32, IL6ST, ANXA1, PAWR, MMP14, THY1, VCAM1, CASP3, CD81, RIPK3, RIPK2, FAS	52.5287
GOTERM_BP_FAT	GO:0050863~regulation of T cell activation	10	VCAM1, CASP3, CEBPB, IL6ST, LRRC32, RIPK3, ANXA1, RIPK2, PAWR, THY1	55.1007
GOTERM_BP_FAT	GO:0071593~lymphocyte aggregation	14	CEBPB, LRRC32, IL6ST, ANXA1, PAWR, CXCL12, APBB1IP, FOXP1, THY1, VCAM1, CASP3, RIPK3, RIPK2, FAS	55.8277
GOTERM_BP_FAT	GO:0042110~T cell activation	14	CEBPB, LRRC32, IL6ST, ANXA1, PAWR, CXCL12, APBB1IP, FOXP1, THY1, VCAM1, CASP3, RIPK3, RIPK2, FAS	55.916
GOTERM_BP_FAT	GO:0070489~T cell aggregation	14	CEBPB, LRRC32, IL6ST, ANXA1, PAWR, CXCL12, APBB1IP, FOXP1, THY1, VCAM1, CASP3, RIPK3, RIPK2, FAS	55.916
GOTERM_BP_FAT	GO:0070486~leukocyte aggregation	14	CEBPB, LRRC32, IL6ST, ANXA1, PAWR, CXCL12, APBB1IP, FOXP1, THY1, VCAM1, CASP3, RIPK3, RIPK2, FAS	60.0965
GOTERM_BP_FAT	GO:0002684~positive regulation of immune system process	20	ENAH, CXCL5, C3, IL6ST, ANXA1, MAPKAPK2, PAWR, MMP14, MMP2, CXCL12, FOXP1, VASP, THY1, VCAM1, CD81, RIPK2, FOXC1, THBS1, CD14, IFI204	66.3643
GOTERM_BP_FAT	GO:0051250~negative regulation of lymphocyte activation	6	CASP3, CEBPB, LRRC32, ANXA1, PAWR, FAS	70.4323
GOTERM_BP_FAT	GO:0050868~negative regulation of T cell activation	5	CASP3, CEBPB, LRRC32, ANXA1, PAWR	76.9767
GOTERM_BP_FAT	GO:0007159~leukocyte cell-cell adhesion	14	CEBPB, LRRC32, IL6ST, ANXA1, PAWR, CXCL12, APBB1IP, FOXP1, THY1, VCAM1, CASP3, RIPK3, RIPK2, FAS	77.9121
GOTERM_BP_FAT	GO:0042130~negative regulation of T cell proliferation	4	CASP3, CEBPB, LRRC32, PAWR	78.426
GOTERM_BP_FAT	GO:0050869~negative regulation of B cell activation	3	CASP3, PAWR, FAS	85.1174
GOTERM_BP_FAT	GO:0002695~negative regulation of leukocyte activation	6	CASP3, CEBPB, LRRC32, ANXA1, PAWR, FAS	86.9629
GOTERM_BP_FAT	GO:0045321~leukocyte activation	19	CEBPB, LRRC32, IL6ST, ANXA1, PAWR, MMP14, APBB1IP, CXCL12, FOXP1, THY1, VCAM1, CASP3, CD81, RIPK3, RIPK2, FAS, THBS1, ADAM9, IFI204	88.2551
GOTERM_BP_FAT	GO:0002696~positive regulation of leukocyte activation	9	VCAM1, IL6ST, CD81, ANXA1, RIPK2, THBS1, MMP14, THY1, IFI204	89.7729
GOTERM_BP_FAT	GO:0032945~negative regulation of mononuclear cell proliferation	4	CASP3, CEBPB, LRRC32, PAWR	91.8826
GOTERM_BP_FAT	GO:0050672~negative regulation of lymphocyte proliferation	4	CASP3, CEBPB, LRRC32, PAWR	91.8826
GOTERM_BP_FAT	GO:0070664~negative regulation of leukocyte proliferation	4	CASP3, CEBPB, LRRC32, PAWR	93.6114
GOTERM_BP_FAT	GO:0022409~positive regulation of cell-cell adhesion	7	VCAM1, IL6ST, ANK3, ANXA1, RIPK2, PAWR, THY1	93.9214
GOTERM_BP_FAT	GO:0046649~lymphocyte activation	16	CEBPB, LRRC32, IL6ST, ANXA1, PAWR, MMP14, APBB1IP, CXCL12, FOXP1, THY1, VCAM1, CASP3, CD81, RIPK3, RIPK2, FAS	95.6379
GOTERM_BP_FAT	GO:0050671~positive regulation of lymphocyte proliferation	5	VCAM1, IL6ST, CD81, ANXA1, RIPK2	96.8584
GOTERM_BP_FAT	GO:0032946~positive regulation of mononuclear cell proliferation	5	VCAM1, IL6ST, CD81, ANXA1, RIPK2	97.2827
GOTERM_BP_FAT	GO:1903039~positive regulation of leukocyte cell-cell adhesion	6	VCAM1, IL6ST, ANXA1, RIPK2, PAWR, THY1	97.5914
GOTERM_BP_FAT	GO:0070665~positive regulation of leukocyte proliferation	5	VCAM1, IL6ST, CD81, ANXA1, RIPK2	98.2732
GOTERM_BP_FAT	GO:0042102~positive regulation of T cell proliferation	4	VCAM1, IL6ST, ANXA1, RIPK2	98.4939
GOTERM_BP_FAT	GO:0050864~regulation of B cell activation	5	CASP3, CD81, PAWR, FAS, MMP14	99.0163
GOTERM_BP_FAT	GO:0050776~regulation of immune response	14	ENAH, C3, COL3A1, ANXA1, MAPKAPK2, PAWR, MMP2, VASP, THY1, SERPINB9, RIPK3, RIPK2, JAK2, CD14	99.0327
GOTERM_BP_FAT	GO:0032623~interleukin-2 production	3	ANXA1, RIPK2, PAWR	99.6354
GOTERM_BP_FAT	GO:0051251~positive regulation of lymphocyte activation	7	VCAM1, IL6ST, CD81, ANXA1, RIPK2, MMP14, THY1	99.6773
GOTERM_BP_FAT	GO:0030888~regulation of B cell proliferation	3	CASP3, CD81, PAWR	99.8054
GOTERM_BP_FAT	GO:0050870~positive regulation of T cell activation	5	VCAM1, IL6ST, ANXA1, RIPK2, THY1	99.913
GOTERM_BP_FAT	GO:0042113~B cell activation	6	CASP3, CD81, PAWR, FAS, MMP14, FOXP1	99.9998
GOTERM_BP_FAT	GO:0042100~B cell proliferation	3	CASP3, CD81, PAWR	99.9999
Annotation Cluster 30	Enrichment Score: 2.3081202189030283
Category	Term	Count	Genes	FDR
GOTERM_BP_FAT	GO:0038084~vascular endothelial growth factor signaling pathway	6	XDH, NRP1, PDGFRA, PDGFRB, HSPB1, FOXC1	0.0205787
GOTERM_BP_FAT	GO:0048871~multicellular organismal homeostasis	13	EGFR, XDH, MAP1A, IL1RN, COL2A1, AMPD3, SLC11A2, PLA2G4A, COL14A1, HSPB1, ABAT, PDGFRB, FOXC1	18.0258
GOTERM_BP_FAT	GO:0001894~tissue homeostasis	9	EGFR, XDH, PLA2G4A, COL14A1, MAP1A, PDGFRB, HSPB1, FOXC1, COL2A1	39.8491
GOTERM_BP_FAT	GO:0060249~anatomical structure homeostasis	9	EGFR, XDH, PLA2G4A, COL14A1, MAP1A, PDGFRB, HSPB1, FOXC1, COL2A1	98.2388
Annotation Cluster 31	Enrichment Score: 2.2937579681672577
Category	Term	Count	Genes	FDR
GOTERM_BP_FAT	GO:0048008~platelet-derived growth factor receptor signaling pathway	7	LRP1, NRP1, PDGFRA, PDGFRB, JAK2, SLC9A3R1, GLRX	0.412628
GOTERM_BP_FAT	GO:0010642~negative regulation of platelet-derived growth factor receptor signaling pathway	3	LRP1, SLC9A3R1, GLRX	25.9503
GOTERM_BP_FAT	GO:0010640~regulation of platelet-derived growth factor receptor signaling pathway	3	LRP1, SLC9A3R1, GLRX	51.8315
Annotation Cluster 32	Enrichment Score: 2.2847872088257533
Category	Term	Count	Genes	FDR
GOTERM_BP_FAT	GO:0051094~positive regulation of developmental process	37	TRIOBP, NRP1, CYP1B1, CXCL5, IL6ST, C3, IMPACT, ARHGAP35, PAWR, TIMP2, EPHB3, CXCL12, IGF1R, PTGIS, SERPINE2, RRAS, THBS1, PLCB1, EHD2, GPC1, ADAM9, FN1, ANXA1, S100A10, MUSTN1, MMP14, MYADM, FOXP1, PDGFRA, PDGFRB, TGFBR3, RIPK2, HSPB1, FOXC1, TMSB4X, COL1A1, TGFB1I1	1.31724
GOTERM_BP_FAT	GO:0045597~positive regulation of cell differentiation	29	TRIOBP, NRP1, CXCL5, IL6ST, IMPACT, ARHGAP35, TIMP2, CXCL12, IGF1R, SERPINE2, PLCB1, EHD2, GPC1, FN1, CEBPB, ANXA1, S100A10, MUSTN1, MMP14, MYADM, FOXP1, RIPK2, HSPB1, TMSB4X, JAK2, FOXC1, TGFB1I1, COL1A1, IFI204	5.58686
GOTERM_BP_FAT	GO:0010720~positive regulation of cell development	16	TRIOBP, NRP1, CXCL5, IL6ST, IMPACT, S100A10, ARHGAP35, TIMP2, MYADM, CXCL12, IGF1R, SERPINE2, HSPB1, COL1A1, TGFB1I1, FN1	72.1076
Annotation Cluster 33	Enrichment Score: 2.227811577091394
Category	Term	Count	Genes	FDR
GOTERM_BP_FAT	GO:0080134~regulation of response to stress	38	XDH, ATP1B1, CXCL5, C3, IMPACT, PRRX1, MAPKAPK2, PAWR, CXCL12, MMP2, KANK1, IGF1R, PTGIS, ATP2B4, SERPINE2, TGM2, THBS1, PLCB1, GLRX, EGFR, NOL3, MAP1A, IL1RN, ANXA1, FOXP1, SOD2, SERPINB9, EYA4, PLA2G4A, CHID1, PDGFRA, FABP4, ABAT, RIPK2, TGFBR3, HSPB1, JAK2, CD14	0.243439
GOTERM_BP_FAT	GO:0032103~positive regulation of response to external stimulus	15	EGFR, NRP1, CXCL5, C3, CXCL12, IGF1R, PLA2G4A, TGM2, FABP4, PDGFRB, HSPB1, RIPK2, JAK2, THBS1, FN1	0.287864
GOTERM_BP_FAT	GO:0006954~inflammatory response	24	EGFR, CEBPB, CXCL5, LXN, C3, IL1RN, PTGS1, CSPG4, ANXA1, SAA3, MAPKAPK2, CXCL12, VCAM1, SERPINB9, PLA2G4A, CHID1, PTGIS, TGM2, FABP4, JAK2, FAS, THBS1, CD14, FN1	0.375344
GOTERM_BP_FAT	GO:0032101~regulation of response to external stimulus	24	EGFR, ATP1B1, NRP1, CXCL5, C3, MAP1A, ANXA1, CXCL12, FOXP1, IGF1R, PLA2G4A, CHID1, PTGIS, SERPINE2, PDGFRA, TGM2, FABP4, PDGFRB, RIPK2, HSPB1, ABAT, JAK2, THBS1, FN1	7.35117
GOTERM_BP_FAT	GO:0031347~regulation of defense response	18	EGFR, ATP1B1, CXCL5, C3, MAP1A, ANXA1, MAPKAPK2, MMP2, FOXP1, SERPINB9, PLA2G4A, CHID1, PTGIS, TGM2, FABP4, RIPK2, JAK2, CD14	33.1674
GOTERM_BP_FAT	GO:0050729~positive regulation of inflammatory response	6	EGFR, PLA2G4A, C3, TGM2, FABP4, JAK2	50.8405
GOTERM_BP_FAT	GO:0031349~positive regulation of defense response	10	EGFR, PLA2G4A, C3, TGM2, FABP4, RIPK2, JAK2, MAPKAPK2, MMP2, CD14	54.3867
GOTERM_BP_FAT	GO:0050727~regulation of inflammatory response	9	EGFR, PLA2G4A, CHID1, PTGIS, C3, ANXA1, TGM2, FABP4, JAK2	85.9949
GOTERM_BP_FAT	GO:0006952~defense response	30	ATP1B1, CXCL5, C3, LXN, PTGS1, CSPG4, MAPKAPK2, MMP2, CXCL12, VCAM1, PTGIS, TGM2, FAS, THBS1, FN1, EGFR, CEBPB, MAP1A, IL1RN, SAA3, ANXA1, FOXP1, LCN2, SERPINB9, PLA2G4A, CHID1, FABP4, RIPK2, JAK2, CD14	97.5363
Annotation Cluster 34	Enrichment Score: 2.220301196432675
Category	Term	Count	Genes	FDR
GOTERM_BP_FAT	GO:0060322~head development	28	NRP1, COL3A1, ARHGAP35, GNG12, EPHB3, MMP2, CXCL12, AKR1C14, APLP2, CKB, IGF1R, ATP2B4, SERPINE2, BAG3, OXCT1, RRAS, FAS, PLCB1, DCLK1, KIF14, EGFR, GNAO1, GAS1, LRP1, PDGFRA, ABAT, FOXC1, COL1A1	0.488043
GOTERM_BP_FAT	GO:0007417~central nervous system development	31	NRP1, IL6ST, LMO4, COL3A1, ARHGAP35, COL2A1, GNG12, EPHB3, TIMP2, CXCL12, AKR1C14, APLP2, CKB, IGF1R, ATP2B4, SERPINE2, BAG3, OXCT1, FAS, PLCB1, DCLK1, KIF14, EGFR, GNAO1, GAS1, FOXP1, LRP1, ABAT, VCAN, FOXC1, CDH11	1.14633
GOTERM_BP_FAT	GO:0007420~brain development	24	KIF14, EGFR, GNAO1, NRP1, COL3A1, ARHGAP35, GAS1, GNG12, EPHB3, CXCL12, AKR1C14, APLP2, CKB, IGF1R, LRP1, ATP2B4, SERPINE2, BAG3, OXCT1, ABAT, FOXC1, FAS, PLCB1, DCLK1	5.08324
GOTERM_BP_FAT	GO:0030900~forebrain development	15	KIF14, EGFR, GNAO1, NRP1, COL3A1, ARHGAP35, GNG12, EPHB3, CXCL12, AKR1C14, APLP2, ATP2B4, LRP1, PLCB1, DCLK1	14.6048
GOTERM_BP_FAT	GO:0021543~pallium development	9	EGFR, KIF14, LRP1, ATP2B4, NRP1, COL3A1, GNG12, PLCB1, AKR1C14	16.3559
GOTERM_BP_FAT	GO:0021537~telencephalon development	11	EGFR, KIF14, LRP1, ATP2B4, NRP1, COL3A1, GNG12, EPHB3, PLCB1, CXCL12, AKR1C14	21.5226
GOTERM_BP_FAT	GO:0021987~cerebral cortex development	7	EGFR, KIF14, LRP1, NRP1, COL3A1, GNG12, PLCB1	22.7155
GOTERM_BP_FAT	GO:0021761~limbic system development	4	KIF14, ATP2B4, NRP1, AKR1C14	99.8473
Annotation Cluster 35	Enrichment Score: 2.19363560548171
Category	Term	Count	Genes	FDR
GOTERM_BP_FAT	GO:0001501~skeletal system development	24	GLG1, COL3A1, WASF2, FBN1, PRRX1, MGP, COL2A1, PRRX2, GAS1, MUSTN1, MMP14, SERPINH1, MMP2, FOXP1, PDGFRA, COL1A2, PDGFRB, VCAN, PBX1, CHSY1, FOXC1, COL1A1, THBS1, PAPSS2	0.0159681
GOTERM_BP_FAT	GO:0048705~skeletal system morphogenesis	13	GLG1, PRRX1, COL2A1, GAS1, PRRX2, MMP14, SERPINH1, MMP2, PDGFRA, PDGFRB, CHSY1, COL1A1, THBS1	1.12085
GOTERM_BP_FAT	GO:0061448~connective tissue development	13	GLG1, PRRX1, MGP, COL2A1, MUSTN1, PRRX2, SERPINH1, COL5A1, OXCT1, PDGFRB, CHSY1, COL1A1, THBS1	2.71788
GOTERM_BP_FAT	GO:0060348~bone development	11	GLG1, WASF2, FBN1, COL2A1, CHSY1, COL1A1, THBS1, MMP14, SERPINH1, PAPSS2, FOXP1	2.77807
GOTERM_BP_FAT	GO:0060349~bone morphogenesis	7	GLG1, COL2A1, CHSY1, COL1A1, THBS1, MMP14, SERPINH1	9.35184
GOTERM_BP_FAT	GO:0051216~cartilage development	10	GLG1, PRRX1, MGP, COL2A1, CHSY1, COL1A1, MUSTN1, PRRX2, THBS1, SERPINH1	9.46964
GOTERM_BP_FAT	GO:0060351~cartilage development involved in endochondral bone morphogenesis	4	COL2A1, COL1A1, THBS1, SERPINH1	21.419
GOTERM_BP_FAT	GO:0060350~endochondral bone morphogenesis	5	COL2A1, COL1A1, THBS1, MMP14, SERPINH1	23.4381
GOTERM_BP_FAT	GO:0010812~negative regulation of cell-substrate adhesion	4	COL1A1, THBS1, MMP14, KANK1	64.3869
GOTERM_BP_FAT	GO:0001958~endochondral ossification	3	COL2A1, COL1A1, MMP14	81.6729
GOTERM_BP_FAT	GO:0036075~replacement ossification	3	COL2A1, COL1A1, MMP14	81.6729
GOTERM_BP_FAT	GO:0002062~chondrocyte differentiation	4	COL2A1, CHSY1, MUSTN1, SERPINH1	99.1823
Annotation Cluster 36	Enrichment Score: 2.1687951566587
Category	Term	Count	Genes	FDR
GOTERM_BP_FAT	GO:2001233~regulation of apoptotic signaling pathway	17	NOL3, NRP1, COL2A1, GAS1, SLC9A3R1, CXCL12, ITM2C, SOD2, PLAUR, EYA4, RIPK3, HSPB1, JAK2, NFATC4, FAS, THBS1, URI1	1.10037
GOTERM_BP_FAT	GO:2001234~negative regulation of apoptotic signaling pathway	10	EYA4, NOL3, NRP1, HSPB1, COL2A1, GAS1, URI1, CXCL12, SOD2, PLAUR	15.0513
GOTERM_BP_FAT	GO:2001242~regulation of intrinsic apoptotic signaling pathway	8	NOL3, RIPK3, HSPB1, URI1, SLC9A3R1, CXCL12, SOD2, PLAUR	19.4894
GOTERM_BP_FAT	GO:2001243~negative regulation of intrinsic apoptotic signaling pathway	6	NOL3, HSPB1, URI1, CXCL12, SOD2, PLAUR	24.4201
GOTERM_BP_FAT	GO:2001236~regulation of extrinsic apoptotic signaling pathway	8	EYA4, NOL3, NRP1, COL2A1, FAS, GAS1, THBS1, ITM2C	27.457
Annotation Cluster 37	Enrichment Score: 2.156147417397945
Category	Term	Count	Genes	FDR
GOTERM_BP_FAT	GO:0031032~actomyosin structure organization	11	PFN2, SORBS3, SORBS1, WASF2, PDGFRA, PDGFRB, S100A10, LMOD1, CNN1, TPM1, FOXP1	0.500721
GOTERM_BP_FAT	GO:0051017~actin filament bundle assembly	9	PFN2, SORBS3, SORBS1, CALD1, WASF2, S100A10, PAWR, TPM1, SYNPO	3.66342
GOTERM_BP_FAT	GO:0061572~actin filament bundle organization	9	PFN2, SORBS3, SORBS1, CALD1, WASF2, S100A10, PAWR, TPM1, SYNPO	4.18102
GOTERM_BP_FAT	GO:0051492~regulation of stress fiber assembly	6	PFN2, SORBS3, WASF2, S100A10, TPM1, SYNPO	13.5603
GOTERM_BP_FAT	GO:0043149~stress fiber assembly	6	PFN2, SORBS3, SORBS1, WASF2, S100A10, TPM1	15.0041
GOTERM_BP_FAT	GO:0030038~contractile actin filament bundle assembly	6	PFN2, SORBS3, SORBS1, WASF2, S100A10, TPM1	15.0041
GOTERM_BP_FAT	GO:0032233~positive regulation of actin filament bundle assembly	5	PFN2, SORBS3, S100A10, TPM1, SYNPO	18.773
GOTERM_BP_FAT	GO:0032231~regulation of actin filament bundle assembly	6	PFN2, SORBS3, WASF2, S100A10, TPM1, SYNPO	25.3902
GOTERM_BP_FAT	GO:0051495~positive regulation of cytoskeleton organization	9	PFN2, SORBS3, S100A10, LMOD1, ARPIN, TPM1, VASP, DSTN, SYNPO	25.6946
GOTERM_BP_FAT	GO:0044089~positive regulation of cellular component biogenesis	14	WASF2, S100A10, ARHGAP35, ARPIN, EPHB3, PALLD, TPM1, VASP, PFN2, SORBS3, VPS4A, LMOD1, FAS, SYNPO	44.5866
GOTERM_BP_FAT	GO:0051496~positive regulation of stress fiber assembly	4	PFN2, SORBS3, S100A10, TPM1	49.0034
Annotation Cluster 38	Enrichment Score: 2.115511328890249
Category	Term	Count	Genes	FDR
GOTERM_BP_FAT	GO:0050730~regulation of peptidyl-tyrosine phosphorylation	12	EGFR, NRP1, IL6ST, CRLF1, CD81, PDGFRA, CSPG4, PDGFRB, RIPK2, JAK2, APLP2, MVP	2.39911
GOTERM_BP_FAT	GO:0018108~peptidyl-tyrosine phosphorylation	13	EGFR, IGF1R, NRP1, IL6ST, CRLF1, CD81, PDGFRA, CSPG4, PDGFRB, RIPK2, JAK2, APLP2, MVP	3.4679
GOTERM_BP_FAT	GO:0018212~peptidyl-tyrosine modification	13	EGFR, IGF1R, NRP1, IL6ST, CRLF1, CD81, PDGFRA, CSPG4, PDGFRB, RIPK2, JAK2, APLP2, MVP	3.68943
GOTERM_BP_FAT	GO:0050731~positive regulation of peptidyl-tyrosine phosphorylation	8	NRP1, IL6ST, CRLF1, CD81, PDGFRA, CSPG4, RIPK2, JAK2	31.9997
GOTERM_BP_FAT	GO:0018193~peptidyl-amino acid modification	20	EGFR, NRP1, IL6ST, CRLF1, CSPG4, MAPKAPK2, APLP2, IGF1R, PFN2, ATP2B4, CD81, PPIC, PDGFRA, TGM2, PDGFRB, RIPK2, JAK2, DCLK1, GFRA2, MVP	99.7577
Annotation Cluster 39	Enrichment Score: 2.0776333396114772
Category	Term	Count	Genes	FDR
GOTERM_BP_FAT	GO:0034446~substrate adhesion-dependent cell spreading	8	KIF14, TRIOBP, S100A10, ANTXR1, EPHB3, MYADM, KANK1, FN1	0.731762
GOTERM_BP_FAT	GO:0010810~regulation of cell-substrate adhesion	10	TRIOBP, S100A10, NID1, JAK2, COL1A1, THBS1, MMP14, MYADM, KANK1, FN1	5.15848
GOTERM_BP_FAT	GO:0010811~positive regulation of cell-substrate adhesion	7	TRIOBP, S100A10, NID1, JAK2, THBS1, MYADM, FN1	16.3941
GOTERM_BP_FAT	GO:1900024~regulation of substrate adhesion-dependent cell spreading	4	TRIOBP, S100A10, MYADM, KANK1	53.0215
GOTERM_BP_FAT	GO:1900026~positive regulation of substrate adhesion-dependent cell spreading	3	TRIOBP, S100A10, MYADM	86.6338
Annotation Cluster 40	Enrichment Score: 2.0691467504340975
Category	Term	Count	Genes	FDR
GOTERM_BP_FAT	GO:0038084~vascular endothelial growth factor signaling pathway	6	XDH, NRP1, PDGFRA, PDGFRB, HSPB1, FOXC1	0.0205787
GOTERM_BP_FAT	GO:0048008~platelet-derived growth factor receptor signaling pathway	7	LRP1, NRP1, PDGFRA, PDGFRB, JAK2, SLC9A3R1, GLRX	0.412628
GOTERM_BP_FAT	GO:0061438~renal system vasculature morphogenesis	3	NRP1, PDGFRA, PDGFRB	12.4083
GOTERM_BP_FAT	GO:0061439~kidney vasculature morphogenesis	3	NRP1, PDGFRA, PDGFRB	12.4083
GOTERM_BP_FAT	GO:0061298~retina vasculature development in camera-type eye	4	CYP1B1, NRP1, PDGFRA, PDGFRB	18.0437
GOTERM_BP_FAT	GO:0070374~positive regulation of ERK1 and ERK2 cascade	8	EGFR, NRP1, C3, PDGFRA, PDGFRB, RIPK2, ST5, NQO2	51.0747
GOTERM_BP_FAT	GO:0050920~regulation of chemotaxis	8	NRP1, CXCL5, PDGFRA, PDGFRB, HSPB1, THBS1, CXCL12, FN1	58.7044
GOTERM_BP_FAT	GO:0061440~kidney vasculature development	3	NRP1, PDGFRA, PDGFRB	77.6407
GOTERM_BP_FAT	GO:0061437~renal system vasculature development	3	NRP1, PDGFRA, PDGFRB	77.6407
GOTERM_BP_FAT	GO:0060041~retina development in camera-type eye	6	ATP2B4, CYP1B1, NRP1, PDGFRA, PDGFRB, THY1	96.8306
Annotation Cluster 41	Enrichment Score: 2.0480068804281886
Category	Term	Count	Genes	FDR
GOTERM_BP_FAT	GO:0048844~artery morphogenesis	7	LRP1, NRP1, COL3A1, PRRX1, PDGFRB, FOXC1, PRRX2	1.59436
GOTERM_BP_FAT	GO:0060840~artery development	8	LRP1, NRP1, COL3A1, PRRX1, PDGFRB, FOXC1, PRRX2, LOX	1.7678
GOTERM_BP_FAT	GO:0035904~aorta development	4	LRP1, COL3A1, PDGFRB, LOX	77.0757
GOTERM_BP_FAT	GO:0035909~aorta morphogenesis	3	LRP1, COL3A1, PDGFRB	88.0218
Annotation Cluster 42	Enrichment Score: 2.0017796854168193
Category	Term	Count	Genes	FDR
GOTERM_BP_FAT	GO:0007507~heart development	32	NRP1, PDLIM5, LMO4, COL3A1, COL2A1, BICC1, MMP2, TPM1, VCAM1, CASP3, OXCT1, NFATC4, LOX, THBS1, EGFR, ACADM, MICAL2, FBN1, NEXN, COL5A1, FOXP1, SOD2, LRP1, COL14A1, CPE, PKP2, PDGFRA, PDGFRB, SGCD, TGFBR3, VCAN, FOXC1	3.48315e-05
GOTERM_BP_FAT	GO:0031032~actomyosin structure organization	11	PFN2, SORBS3, SORBS1, WASF2, PDGFRA, PDGFRB, S100A10, LMOD1, CNN1, TPM1, FOXP1	0.500721
GOTERM_BP_FAT	GO:0061061~muscle structure development	23	ACADM, NOL3, CRYAB, PDLIM5, COL3A1, MMP14, NEXN, CXCL12, TPM1, FOXP1, COL14A1, PKP2, PDGFRA, PDGFRB, SGCD, TGFBR3, TMSB4X, NFATC4, FOXC1, LMOD1, PLCB1, EHD2, GPC1	1.82944
GOTERM_BP_FAT	GO:0042692~muscle cell differentiation	17	ACADM, NOL3, PDLIM5, MMP14, NEXN, TPM1, CXCL12, FOXP1, COL14A1, PDGFRA, PDGFRB, SGCD, TMSB4X, NFATC4, LMOD1, PLCB1, EHD2	2.55162
GOTERM_BP_FAT	GO:0048738~cardiac muscle tissue development	12	ACADM, COL14A1, PKP2, PDLIM5, PDGFRA, PDGFRB, TGFBR3, SGCD, FOXC1, NEXN, TPM1, FOXP1	2.75563
GOTERM_BP_FAT	GO:0035051~cardiocyte differentiation	9	EGFR, ACADM, COL14A1, PDLIM5, PDGFRA, PDGFRB, TGFBR3, NEXN, FOXP1	7.92507
GOTERM_BP_FAT	GO:0051146~striated muscle cell differentiation	12	ACADM, COL14A1, PDLIM5, PDGFRA, PDGFRB, LMOD1, NEXN, MMP14, EHD2, CXCL12, TPM1, FOXP1	13.2457
GOTERM_BP_FAT	GO:0055001~muscle cell development	9	PDLIM5, PDGFRA, PDGFRB, SGCD, NFATC4, LMOD1, NEXN, TPM1, FOXP1	15.5103
GOTERM_BP_FAT	GO:0030239~myofibril assembly	5	PDGFRA, PDGFRB, LMOD1, TPM1, FOXP1	23.4381
GOTERM_BP_FAT	GO:0055007~cardiac muscle cell differentiation	7	ACADM, COL14A1, PDLIM5, PDGFRA, PDGFRB, NEXN, FOXP1	26.6985
GOTERM_BP_FAT	GO:0003229~ventricular cardiac muscle tissue development	5	COL14A1, PKP2, TGFBR3, FOXC1, TPM1	27.2311
GOTERM_BP_FAT	GO:0035265~organ growth	8	COL14A1, PDLIM5, PDGFRA, PDGFRB, TGFBR3, FOXC1, THBS1, FOXP1	35.9476
GOTERM_BP_FAT	GO:0060537~muscle tissue development	14	ACADM, COL14A1, PKP2, PDLIM5, COL3A1, PDGFRA, PDGFRB, SGCD, TGFBR3, FOXC1, NEXN, GPC1, TPM1, FOXP1	42.2539
GOTERM_BP_FAT	GO:0014706~striated muscle tissue development	13	ACADM, COL14A1, PKP2, PDLIM5, PDGFRA, PDGFRB, SGCD, TGFBR3, FOXC1, NEXN, GPC1, TPM1, FOXP1	53.5062
GOTERM_BP_FAT	GO:0055006~cardiac cell development	5	PDLIM5, PDGFRA, PDGFRB, TGFBR3, NEXN	59.8529
GOTERM_BP_FAT	GO:0055002~striated muscle cell development	7	PDLIM5, PDGFRA, PDGFRB, LMOD1, NEXN, TPM1, FOXP1	60.5261
GOTERM_BP_FAT	GO:0055017~cardiac muscle tissue growth	5	COL14A1, PDLIM5, TGFBR3, FOXC1, FOXP1	63.9025
GOTERM_BP_FAT	GO:0060419~heart growth	5	COL14A1, PDLIM5, TGFBR3, FOXC1, FOXP1	72.5874
GOTERM_BP_FAT	GO:0055013~cardiac muscle cell development	4	PDLIM5, PDGFRA, PDGFRB, NEXN	93.6114
GOTERM_BP_FAT	GO:0007517~muscle organ development	10	COL14A1, CRYAB, PKP2, COL3A1, TGFBR3, SGCD, FOXC1, GPC1, TPM1, FOXP1	97.9836
GOTERM_BP_FAT	GO:0010927~cellular component assembly involved in morphogenesis	8	PDGFRA, PDGFRB, ABCC4, ARHGAP35, LMOD1, GPC1, TPM1, FOXP1	99.695
GOTERM_BP_FAT	GO:0070925~organelle assembly	11	RAB32, ATG101, PDGFRA, PDGFRB, ABCC4, VPS4A, ARHGAP35, LMOD1, PALLD, TPM1, FOXP1	100
Annotation Cluster 43	Enrichment Score: 1.986615009578974
Category	Term	Count	Genes	FDR
GOTERM_BP_FAT	GO:0097193~intrinsic apoptotic signaling pathway	16	CRIP1, CEBPB, NOL3, CYP1B1, SLC9A3R1, CXCL12, SOD2, PLAUR, CASP3, RIPK3, HSPB1, JAK2, NFATC4, URI1, PHLDA3, IFI204	0.0991412
GOTERM_BP_FAT	GO:0008630~intrinsic apoptotic signaling pathway in response to DNA damage	6	CRIP1, NFATC4, PHLDA3, CXCL12, SOD2, IFI204	45.0369
GOTERM_BP_FAT	GO:0006974~cellular response to DNA damage stimulus	11	EGFR, EYA4, CRIP1, CASP3, NFATC4, MAPKAPK2, MACROD1, PHLDA3, CXCL12, SOD2, IFI204	100
Annotation Cluster 44	Enrichment Score: 1.957850801656176
Category	Term	Count	Genes	FDR
GOTERM_BP_FAT	GO:0014812~muscle cell migration	7	LRP1, CYP1B1, IL6ST, ANXA1, PDGFRB, TMSB4X, TPM1	6.56812
GOTERM_BP_FAT	GO:0014910~regulation of smooth muscle cell migration	6	LRP1, CYP1B1, IL6ST, PDGFRB, TMSB4X, TPM1	14.2714
GOTERM_BP_FAT	GO:0014909~smooth muscle cell migration	6	LRP1, CYP1B1, IL6ST, PDGFRB, TMSB4X, TPM1	15.7581
GOTERM_BP_FAT	GO:0014911~positive regulation of smooth muscle cell migration	4	CYP1B1, IL6ST, PDGFRB, TMSB4X	66.1453
Annotation Cluster 45	Enrichment Score: 1.9560486861628503
Category	Term	Count	Genes	FDR
GOTERM_BP_FAT	GO:0006081~cellular aldehyde metabolic process	7	PGLS, CYP1B1, DHRS4, H6PD, PGD, ESD, GLO1	0.616955
GOTERM_BP_FAT	GO:0006739~NADP metabolic process	5	PGLS, H6PD, FMO1, PGD, DCXR	3.66222
GOTERM_BP_FAT	GO:0051186~cofactor metabolic process	14	LDHB, ACADSB, PCBD2, PGD, ACOT1, CBR3, SLC11A2, PGLS, CBR2, FMO1, H6PD, BLVRB, GAMT, DCXR	15.2337
GOTERM_BP_FAT	GO:0006732~coenzyme metabolic process	12	LDHB, ACADSB, PGLS, CBR2, PCBD2, H6PD, FMO1, PGD, ACOT1, GAMT, CBR3, DCXR	21.5336
GOTERM_BP_FAT	GO:0006098~pentose-phosphate shunt	3	PGLS, H6PD, PGD	22.3339
GOTERM_BP_FAT	GO:0019682~glyceraldehyde-3-phosphate metabolic process	3	PGLS, H6PD, PGD	33.4071
GOTERM_BP_FAT	GO:0046496~nicotinamide nucleotide metabolic process	7	LDHB, PGLS, CBR2, H6PD, FMO1, PGD, DCXR	36.4241
GOTERM_BP_FAT	GO:0019362~pyridine nucleotide metabolic process	7	LDHB, PGLS, CBR2, H6PD, FMO1, PGD, DCXR	36.4241
GOTERM_BP_FAT	GO:0072524~pyridine-containing compound metabolic process	7	LDHB, PGLS, CBR2, H6PD, FMO1, PGD, DCXR	38.3024
GOTERM_BP_FAT	GO:0051156~glucose 6-phosphate metabolic process	3	PGLS, H6PD, PGD	40.9298
GOTERM_BP_FAT	GO:0006733~oxidoreduction coenzyme metabolic process	7	LDHB, PGLS, CBR2, H6PD, FMO1, PGD, DCXR	51.8815
Annotation Cluster 46	Enrichment Score: 1.9334428117155815
Category	Term	Count	Genes	FDR
GOTERM_BP_FAT	GO:0007423~sensory organ development	22	EGFR, CYP1B1, NRP1, CRYAB, PRRX1, COL2A1, ARHGAP35, MAPKAPK2, PRRX2, GAS1, SLC9A3R1, COL5A1, THY1, EYA4, MEIS2, ATP2B4, FAT1, PDGFRA, PDGFRB, FOXC1, RCN1, IFI204	2.03799
GOTERM_BP_FAT	GO:0001654~eye development	15	EGFR, CYP1B1, NRP1, CRYAB, ARHGAP35, GAS1, COL5A1, THY1, MEIS2, ATP2B4, FAT1, PDGFRA, PDGFRB, FOXC1, RCN1	12.2639
GOTERM_BP_FAT	GO:0043010~camera-type eye development	13	EGFR, NRP1, CYP1B1, CRYAB, ARHGAP35, GAS1, THY1, ATP2B4, FAT1, PDGFRA, PDGFRB, FOXC1, RCN1	24.3071
GOTERM_BP_FAT	GO:0060041~retina development in camera-type eye	6	ATP2B4, CYP1B1, NRP1, PDGFRA, PDGFRB, THY1	96.8306
Annotation Cluster 47	Enrichment Score: 1.929946115452032
Category	Term	Count	Genes	FDR
GOTERM_BP_FAT	GO:0006790~sulfur compound metabolic process	15	ACADSB, MICAL2, ACOT1, ACPP, SOD2, GSTM1, GSTM2, CSAD, IDH1, GLO1, GAMT, CHSY1, PAPSS2, GPC1, MGST1	0.666557
GOTERM_BP_FAT	GO:0006749~glutathione metabolic process	6	GSTM1, GSTM2, IDH1, GLO1, MGST1, SOD2	4.0478
GOTERM_BP_FAT	GO:0006575~cellular modified amino acid metabolic process	6	GSTM1, GSTM2, IDH1, GLO1, MGST1, SOD2	74.2113
GOTERM_BP_FAT	GO:0006518~peptide metabolic process	17	EGFR, AEBP1, CYP1B1, IMPACT, MME, ANPEP, SOD2, DNPEP, GSTM1, GSTM2, CPE, IDH1, GLO1, THBS1, FAM129A, RNPEP, MGST1	99.9744
Annotation Cluster 48	Enrichment Score: 1.8971777690161375
Category	Term	Count	Genes	FDR
GOTERM_BP_FAT	GO:0043271~negative regulation of ion transport	9	GNAO1, SERPINE2, ANK3, IL1RN, TCAF2, ABAT, PAWR, THBS1, SLC9A3R1	2.17374
GOTERM_BP_FAT	GO:1903792~negative regulation of anion transport	4	IL1RN, TCAF2, ABAT, THBS1	18.0437
GOTERM_BP_FAT	GO:0044070~regulation of anion transport	4	IL1RN, TCAF2, ABAT, THBS1	96.7893
Annotation Cluster 49	Enrichment Score: 1.8183129059801262
Category	Term	Count	Genes	FDR
GOTERM_BP_FAT	GO:0042060~wound healing	23	EGFR, C3, COL3A1, ANXA1, PDIA6, ARHGAP35, CSRP1, MUSTN1, TPM1, KANK1, COL5A1, MYL9, SERPINE2, PDGFRA, PDGFRB, HSPB1, AHNAK2, ABAT, LOX, COL1A1, THBS1, PAPSS2, FN1	0.00187523
GOTERM_BP_FAT	GO:0034109~homotypic cell-cell adhesion	9	SERPINE2, PKP2, ANK3, PDGFRA, ABAT, PDIA6, HSPB1, CSRP1, MYL9	0.0764394
GOTERM_BP_FAT	GO:0070527~platelet aggregation	7	SERPINE2, PDGFRA, ABAT, PDIA6, HSPB1, CSRP1, MYL9	0.297733
GOTERM_BP_FAT	GO:0007599~hemostasis	11	ANXA7, SERPINE2, C3, PDGFRA, ABAT, PDIA6, HSPB1, CSRP1, THBS1, PAPSS2, MYL9	2.47896
GOTERM_BP_FAT	GO:0007596~blood coagulation	10	SERPINE2, C3, PDGFRA, ABAT, PDIA6, HSPB1, CSRP1, THBS1, PAPSS2, MYL9	5.33976
GOTERM_BP_FAT	GO:0030168~platelet activation	7	SERPINE2, PDGFRA, ABAT, PDIA6, HSPB1, CSRP1, MYL9	7.67881
GOTERM_BP_FAT	GO:0050817~coagulation	10	SERPINE2, C3, PDGFRA, ABAT, PDIA6, HSPB1, CSRP1, THBS1, PAPSS2, MYL9	9.46964
GOTERM_BP_FAT	GO:0050878~regulation of body fluid levels	12	XDH, ANXA7, SERPINE2, C3, PDGFRA, ABAT, PDIA6, HSPB1, CSRP1, THBS1, PAPSS2, MYL9	42.2875
GOTERM_BP_FAT	GO:0010544~negative regulation of platelet activation	3	SERPINE2, PDGFRA, ABAT	44.6395
GOTERM_BP_FAT	GO:1900047~negative regulation of hemostasis	4	SERPINE2, PDGFRA, ABAT, THBS1	51.0222
GOTERM_BP_FAT	GO:0030195~negative regulation of blood coagulation	4	SERPINE2, PDGFRA, ABAT, THBS1	51.0222
GOTERM_BP_FAT	GO:0050819~negative regulation of coagulation	4	SERPINE2, PDGFRA, ABAT, THBS1	54.9969
GOTERM_BP_FAT	GO:1903034~regulation of response to wounding	7	IGF1R, SERPINE2, PDGFRA, ANXA1, ABAT, THBS1, KANK1	60.5261
GOTERM_BP_FAT	GO:0061041~regulation of wound healing	6	SERPINE2, PDGFRA, ANXA1, ABAT, THBS1, KANK1	72.3557
GOTERM_BP_FAT	GO:0061045~negative regulation of wound healing	4	SERPINE2, PDGFRA, ABAT, THBS1	74.2128
GOTERM_BP_FAT	GO:1903036~positive regulation of response to wounding	4	IGF1R, ANXA1, THBS1, KANK1	79.7219
GOTERM_BP_FAT	GO:0010543~regulation of platelet activation	3	SERPINE2, PDGFRA, ABAT	86.6338
GOTERM_BP_FAT	GO:1903035~negative regulation of response to wounding	4	SERPINE2, PDGFRA, ABAT, THBS1	87.2993
GOTERM_BP_FAT	GO:1900046~regulation of hemostasis	4	SERPINE2, PDGFRA, ABAT, THBS1	96.4874
GOTERM_BP_FAT	GO:0030193~regulation of blood coagulation	4	SERPINE2, PDGFRA, ABAT, THBS1	96.4874
GOTERM_BP_FAT	GO:0050818~regulation of coagulation	4	SERPINE2, PDGFRA, ABAT, THBS1	97.5636
GOTERM_BP_FAT	GO:0090303~positive regulation of wound healing	3	ANXA1, THBS1, KANK1	98.8003
GOTERM_BP_FAT	GO:0032102~negative regulation of response to external stimulus	7	CHID1, PTGIS, NRP1, SERPINE2, PDGFRA, ABAT, THBS1	99.8692
Annotation Cluster 50	Enrichment Score: 1.792195984647548
Category	Term	Count	Genes	FDR
GOTERM_BP_FAT	GO:0097192~extrinsic apoptotic signaling pathway in absence of ligand	8	LCN2, EYA4, CASP3, BAG3, COL2A1, FAS, GAS1, ITM2B	0.678812
GOTERM_BP_FAT	GO:0038034~signal transduction in absence of ligand	8	LCN2, EYA4, CASP3, BAG3, COL2A1, FAS, GAS1, ITM2B	0.678812
GOTERM_BP_FAT	GO:2001236~regulation of extrinsic apoptotic signaling pathway	8	EYA4, NOL3, NRP1, COL2A1, FAS, GAS1, THBS1, ITM2C	27.457
GOTERM_BP_FAT	GO:2001239~regulation of extrinsic apoptotic signaling pathway in absence of ligand	4	EYA4, COL2A1, FAS, GAS1	54.9969
GOTERM_BP_FAT	GO:0042471~ear morphogenesis	6	EYA4, PRRX1, COL2A1, PRRX2, GAS1, SLC9A3R1	72.3557
GOTERM_BP_FAT	GO:2001237~negative regulation of extrinsic apoptotic signaling pathway	5	EYA4, NOL3, NRP1, COL2A1, GAS1	76.9767
GOTERM_BP_FAT	GO:1901099~negative regulation of signal transduction in absence of ligand	3	EYA4, COL2A1, GAS1	86.6338
GOTERM_BP_FAT	GO:2001240~negative regulation of extrinsic apoptotic signaling pathway in absence of ligand	3	EYA4, COL2A1, GAS1	86.6338
Annotation Cluster 51	Enrichment Score: 1.7392576420358714
Category	Term	Count	Genes	FDR
GOTERM_BP_FAT	GO:0051241~negative regulation of multicellular organismal process	38	XDH, NRP1, LRRC32, COL3A1, CSPG4, ANPEP, PAWR, ITM2C, MMP2, KANK1, PFN2, ATP2B4, MEIS2, SERPINE2, NFATC4, THBS1, FN1, ARHGDIB, EGFR, NOL3, FBN1, ANXA1, COL5A1, FOXP1, THY1, ABCG2, P2RX4, LRP1, CHID1, CPE, PDGFRA, ABAT, TGFBR3, FOXC1, JAK2, PBX1, CHSY1, TMEM176B	0.135328
GOTERM_BP_FAT	GO:0031344~regulation of cell projection organization	21	NRP1, CXCL5, PDLIM5, WASF2, PRRX1, CSPG4, ARHGAP35, ARPIN, EPHB3, ITM2C, CXCL12, KANK1, THY1, LCN2, IGF1R, PFN2, LRP1, SERPINE2, HSPB1, NFATC4, FN1	11.461
GOTERM_BP_FAT	GO:0031345~negative regulation of cell projection organization	9	PFN2, LRP1, NRP1, CSPG4, NFATC4, ARPIN, ITM2C, KANK1, THY1	17.3275
GOTERM_BP_FAT	GO:0010975~regulation of neuron projection development	17	NRP1, CXCL5, PDLIM5, PRRX1, CSPG4, ARHGAP35, EPHB3, ITM2C, CXCL12, KANK1, THY1, IGF1R, LRP1, SERPINE2, HSPB1, NFATC4, FN1	18.2754
GOTERM_BP_FAT	GO:0051093~negative regulation of developmental process	24	XDH, EGFR, NRP1, COL3A1, FBN1, CSPG4, ANXA1, ARPIN, PAWR, ITM2C, KANK1, COL5A1, FOXP1, THY1, LRP1, MEIS2, CPE, TGFBR3, PBX1, NFATC4, FOXC1, THBS1, TMEM176B, ARHGDIB	20.5681
GOTERM_BP_FAT	GO:0045664~regulation of neuron differentiation	20	NRP1, CXCL5, IMPACT, PDLIM5, PRRX1, CSPG4, ARHGAP35, TIMP2, EPHB3, ITM2C, CXCL12, KANK1, THY1, IGF1R, LRP1, SERPINE2, HSPB1, PBX1, NFATC4, FN1	27.5885
GOTERM_BP_FAT	GO:0045596~negative regulation of cell differentiation	22	XDH, EGFR, NRP1, COL3A1, FBN1, CSPG4, ANXA1, PAWR, ITM2C, KANK1, COL5A1, FOXP1, SOD2, THY1, MEIS2, LRP1, PKP2, TGFBR3, PBX1, NFATC4, TGFB1I1, TMEM176B	29.1236
GOTERM_BP_FAT	GO:0051960~regulation of nervous system development	24	KIF14, NRP1, CXCL5, IL6ST, IMPACT, PDLIM5, COL3A1, PRRX1, CSPG4, ARHGAP35, TIMP2, EPHB3, ITM2C, CXCL12, KANK1, THY1, IGF1R, LRP1, SERPINE2, CPE, HSPB1, PBX1, NFATC4, FN1	43.1432
GOTERM_BP_FAT	GO:0050767~regulation of neurogenesis	22	NRP1, CXCL5, IL6ST, IMPACT, PDLIM5, COL3A1, PRRX1, CSPG4, ARHGAP35, TIMP2, EPHB3, ITM2C, CXCL12, KANK1, THY1, IGF1R, LRP1, SERPINE2, HSPB1, PBX1, NFATC4, FN1	43.5539
GOTERM_BP_FAT	GO:0010721~negative regulation of cell development	12	LRP1, NRP1, COL3A1, FBN1, CSPG4, TGFBR3, NFATC4, PBX1, PAWR, ITM2C, KANK1, THY1	49.8855
GOTERM_BP_FAT	GO:0010977~negative regulation of neuron projection development	7	LRP1, NRP1, CSPG4, NFATC4, ITM2C, KANK1, THY1	52.8565
GOTERM_BP_FAT	GO:0010771~negative regulation of cell morphogenesis involved in differentiation	6	NRP1, TGFBR3, NFATC4, PAWR, KANK1, THY1	57.7093
GOTERM_BP_FAT	GO:0051961~negative regulation of nervous system development	10	LRP1, NRP1, CPE, COL3A1, CSPG4, NFATC4, PBX1, ITM2C, KANK1, THY1	79.8454
GOTERM_BP_FAT	GO:0045665~negative regulation of neuron differentiation	8	LRP1, NRP1, CSPG4, NFATC4, PBX1, ITM2C, KANK1, THY1	81.1504
GOTERM_BP_FAT	GO:0050768~negative regulation of neurogenesis	9	LRP1, NRP1, COL3A1, CSPG4, NFATC4, PBX1, ITM2C, KANK1, THY1	90.4632
Annotation Cluster 52	Enrichment Score: 1.7189163409176669
Category	Term	Count	Genes	FDR
GOTERM_BP_FAT	GO:0070848~response to growth factor	27	GLG1, XDH, NRP1, CALD1, COL3A1, COL2A1, MAPKAPK2, VCAM1, CASP3, MEIS2, CAT, THBS1, GPC1, ADAM9, EGFR, PTPRK, FBN1, GAS1, PDGFRA, COL1A2, HSPB1, TGFBR3, PDGFRB, FOXC1, TGFB1I1, COL1A1, URI1	0.0240149
GOTERM_BP_FAT	GO:0071363~cellular response to growth factor stimulus	25	XDH, GLG1, NRP1, COL3A1, COL2A1, MAPKAPK2, VCAM1, CASP3, CAT, THBS1, GPC1, ADAM9, EGFR, PTPRK, FBN1, GAS1, COL1A2, PDGFRA, TGFBR3, HSPB1, PDGFRB, FOXC1, COL1A1, TGFB1I1, URI1	0.099842
GOTERM_BP_FAT	GO:0071559~response to transforming growth factor beta	11	GLG1, PTPRK, CALD1, COL3A1, FBN1, COL1A2, TGFBR3, COL1A1, TGFB1I1, THBS1, ADAM9	3.85016
GOTERM_BP_FAT	GO:0007179~transforming growth factor beta receptor signaling pathway	9	GLG1, PTPRK, COL3A1, FBN1, COL1A2, TGFBR3, TGFB1I1, THBS1, ADAM9	4.18102
GOTERM_BP_FAT	GO:0071560~cellular response to transforming growth factor beta stimulus	10	GLG1, PTPRK, COL3A1, FBN1, COL1A2, TGFBR3, COL1A1, TGFB1I1, THBS1, ADAM9	11.0229
GOTERM_BP_FAT	GO:0090288~negative regulation of cellular response to growth factor stimulus	7	GLG1, XDH, FBN1, TGFBR3, TGFB1I1, THBS1, GPC1	28.3761
GOTERM_BP_FAT	GO:0030511~positive regulation of transforming growth factor beta receptor signaling pathway	3	TGFBR3, TGFB1I1, THBS1	67.6928
GOTERM_BP_FAT	GO:1903846~positive regulation of cellular response to transforming growth factor beta stimulus	3	TGFBR3, TGFB1I1, THBS1	67.6928
GOTERM_BP_FAT	GO:0030512~negative regulation of transforming growth factor beta receptor signaling pathway	4	GLG1, FBN1, TGFBR3, TGFB1I1	71.1374
GOTERM_BP_FAT	GO:0017015~regulation of transforming growth factor beta receptor signaling pathway	5	GLG1, FBN1, TGFBR3, TGFB1I1, THBS1	71.4213
GOTERM_BP_FAT	GO:1903844~regulation of cellular response to transforming growth factor beta stimulus	5	GLG1, FBN1, TGFBR3, TGFB1I1, THBS1	72.5874
GOTERM_BP_FAT	GO:1903845~negative regulation of cellular response to transforming growth factor beta stimulus	4	GLG1, FBN1, TGFBR3, TGFB1I1	72.7012
GOTERM_BP_FAT	GO:0007178~transmembrane receptor protein serine/threonine kinase signaling pathway	10	GLG1, PTPRK, RBPMS, COL3A1, FBN1, COL1A2, TGFBR3, TGFB1I1, THBS1, ADAM9	86.9208
GOTERM_BP_FAT	GO:0090287~regulation of cellular response to growth factor stimulus	7	GLG1, XDH, FBN1, TGFBR3, TGFB1I1, THBS1, GPC1	98.3831
GOTERM_BP_FAT	GO:0090101~negative regulation of transmembrane receptor protein serine/threonine kinase signaling pathway	4	GLG1, FBN1, TGFBR3, TGFB1I1	99.1823
GOTERM_BP_FAT	GO:0090100~positive regulation of transmembrane receptor protein serine/threonine kinase signaling pathway	4	RBPMS, TGFBR3, TGFB1I1, THBS1	99.5215
GOTERM_BP_FAT	GO:0090092~regulation of transmembrane receptor protein serine/threonine kinase signaling pathway	6	GLG1, RBPMS, FBN1, TGFBR3, TGFB1I1, THBS1	99.6439
Annotation Cluster 53	Enrichment Score: 1.6893235054324223
Category	Term	Count	Genes	FDR
GOTERM_BP_FAT	GO:0007160~cell-matrix adhesion	12	VCAM1, PTPRK, SORBS1, EPDR1, COL3A1, S100A10, NID1, THBS1, MMP14, ADAM9, FN1, THY1	0.281126
GOTERM_BP_FAT	GO:0007044~cell-substrate junction assembly	6	PTPRK, SORBS1, S100A10, MMP14, FN1, THY1	13.5603
GOTERM_BP_FAT	GO:0007045~cell-substrate adherens junction assembly	5	PTPRK, SORBS1, S100A10, MMP14, THY1	19.8937
GOTERM_BP_FAT	GO:0048041~focal adhesion assembly	5	PTPRK, SORBS1, S100A10, MMP14, THY1	19.8937
GOTERM_BP_FAT	GO:0034332~adherens junction organization	6	PTPRK, SORBS1, PKP2, S100A10, MMP14, THY1	23.4675
GOTERM_BP_FAT	GO:0034333~adherens junction assembly	5	PTPRK, SORBS1, S100A10, MMP14, THY1	31.2349
GOTERM_BP_FAT	GO:0034329~cell junction assembly	7	PTPRK, SORBS1, PKP2, S100A10, MMP14, FN1, THY1	60.5261
GOTERM_BP_FAT	GO:0034330~cell junction organization	7	PTPRK, SORBS1, PKP2, S100A10, MMP14, FN1, THY1	88.7432
GOTERM_BP_FAT	GO:0045216~cell-cell junction organization	6	PTPRK, SORBS1, PKP2, S100A10, MMP14, THY1	97.2373
GOTERM_BP_FAT	GO:1901888~regulation of cell junction assembly	3	PKP2, S100A10, MMP14	99.9381
Annotation Cluster 54	Enrichment Score: 1.6609062852873169
Category	Term	Count	Genes	FDR
GOTERM_BP_FAT	GO:0007584~response to nutrient	11	EGFR, VCAM1, ACSL1, RBP1, OXCT1, COL1A1, CAT, NQO1, ACSL4, SOD2, ABCG2	1.46393
GOTERM_BP_FAT	GO:0097305~response to alcohol	8	VCAM1, H6PD, OXCT1, ABAT, CAT, NQO1, CD14, SOD2	42.482
GOTERM_BP_FAT	GO:0045471~response to ethanol	7	VCAM1, OXCT1, ABAT, CAT, NQO1, CD14, SOD2	43.0943
GOTERM_BP_FAT	GO:0014823~response to activity	3	OXCT1, CAT, SOD2	99.9628
Annotation Cluster 55	Enrichment Score: 1.6472265665943315
Category	Term	Count	Genes	FDR
GOTERM_BP_FAT	GO:0035987~endodermal cell differentiation	5	COL12A1, MMP14, MMP2, COL5A1, FN1	10.2161
GOTERM_BP_FAT	GO:0001706~endoderm formation	5	COL12A1, MMP14, MMP2, COL5A1, FN1	19.8937
GOTERM_BP_FAT	GO:0007369~gastrulation	8	IL1RN, COL12A1, FOXC1, MMP14, MYADM, MMP2, COL5A1, FN1	46.6219
GOTERM_BP_FAT	GO:0001704~formation of primary germ layer	6	COL12A1, FOXC1, MMP14, MMP2, COL5A1, FN1	59.9447
GOTERM_BP_FAT	GO:0007492~endoderm development	5	COL12A1, MMP14, MMP2, COL5A1, FN1	66.5022
Annotation Cluster 56	Enrichment Score: 1.6419953874479118
Category	Term	Count	Genes	FDR
GOTERM_BP_FAT	GO:0036473~cell death in response to oxidative stress	7	NOL3, CYP1B1, HSPB1, JAK2, PAWR, SOD2, GLRX	4.16548
GOTERM_BP_FAT	GO:0008631~intrinsic apoptotic signaling pathway in response to oxidative stress	5	NOL3, CYP1B1, HSPB1, JAK2, SOD2	7.34405
GOTERM_BP_FAT	GO:2001243~negative regulation of intrinsic apoptotic signaling pathway	6	NOL3, HSPB1, URI1, CXCL12, SOD2, PLAUR	24.4201
GOTERM_BP_FAT	GO:1903201~regulation of oxidative stress-induced cell death	5	NOL3, HSPB1, PAWR, SOD2, GLRX	35.4062
GOTERM_BP_FAT	GO:1902176~negative regulation of oxidative stress-induced intrinsic apoptotic signaling pathway	3	NOL3, HSPB1, SOD2	48.2807
GOTERM_BP_FAT	GO:1900407~regulation of cellular response to oxidative stress	5	NOL3, HSPB1, PAWR, SOD2, GLRX	48.442
GOTERM_BP_FAT	GO:1903202~negative regulation of oxidative stress-induced cell death	4	NOL3, HSPB1, SOD2, GLRX	54.9969
GOTERM_BP_FAT	GO:1902882~regulation of response to oxidative stress	5	NOL3, HSPB1, PAWR, SOD2, GLRX	55.655
GOTERM_BP_FAT	GO:1902883~negative regulation of response to oxidative stress	4	NOL3, HSPB1, SOD2, GLRX	56.9445
GOTERM_BP_FAT	GO:1900408~negative regulation of cellular response to oxidative stress	4	NOL3, HSPB1, SOD2, GLRX	56.9445
GOTERM_BP_FAT	GO:1902175~regulation of oxidative stress-induced intrinsic apoptotic signaling pathway	3	NOL3, HSPB1, SOD2	75.3925
Annotation Cluster 57	Enrichment Score: 1.6332089285576596
Category	Term	Count	Genes	FDR
GOTERM_BP_FAT	GO:0010559~regulation of glycoprotein biosynthetic process	6	TMEM59, PAWR, MUSTN1, PLCB1, ITM2B, ITM2C	1.51664
GOTERM_BP_FAT	GO:1903018~regulation of glycoprotein metabolic process	6	TMEM59, PAWR, MUSTN1, PLCB1, ITM2B, ITM2C	2.45007
GOTERM_BP_FAT	GO:0042983~amyloid precursor protein biosynthetic process	3	PAWR, ITM2B, ITM2C	12.4083
GOTERM_BP_FAT	GO:0042984~regulation of amyloid precursor protein biosynthetic process	3	PAWR, ITM2B, ITM2C	15.521
GOTERM_BP_FAT	GO:0010561~negative regulation of glycoprotein biosynthetic process	3	TMEM59, ITM2B, ITM2C	29.6537
GOTERM_BP_FAT	GO:1903019~negative regulation of glycoprotein metabolic process	3	TMEM59, ITM2B, ITM2C	40.9298
GOTERM_BP_FAT	GO:0010560~positive regulation of glycoprotein biosynthetic process	3	PAWR, MUSTN1, PLCB1	64.8095
GOTERM_BP_FAT	GO:1903020~positive regulation of glycoprotein metabolic process	3	PAWR, MUSTN1, PLCB1	70.419
GOTERM_BP_FAT	GO:0042982~amyloid precursor protein metabolic process	3	PAWR, ITM2B, ITM2C	77.6407
GOTERM_BP_FAT	GO:1901137~carbohydrate derivative biosynthetic process	17	PID1, AK3, MUSTN1, PAWR, TIMP2, ITM2B, AMPD3, ITM2C, TMEM59, EOGT, GFPT2, PDGFRB, CHSY1, PLCB1, GUK1, PAPSS2, GPC1	81.7781
GOTERM_BP_FAT	GO:0009100~glycoprotein metabolic process	10	TMEM59, EOGT, COL2A1, CHSY1, PAWR, MUSTN1, PLCB1, ITM2B, ITM2C, GPC1	92.9972
GOTERM_BP_FAT	GO:0009101~glycoprotein biosynthetic process	8	TMEM59, EOGT, CHSY1, PAWR, MUSTN1, PLCB1, ITM2B, ITM2C	99.6322
Annotation Cluster 58	Enrichment Score: 1.6111101759647077
Category	Term	Count	Genes	FDR
GOTERM_BP_FAT	GO:0048145~regulation of fibroblast proliferation	7	EGFR, PDGFRA, PDGFRB, PAWR, FTH1, SOD2, FN1	10.7561
GOTERM_BP_FAT	GO:0048144~fibroblast proliferation	7	EGFR, PDGFRA, PDGFRB, PAWR, FTH1, SOD2, FN1	11.2533
GOTERM_BP_FAT	GO:0048146~positive regulation of fibroblast proliferation	4	EGFR, PDGFRA, PDGFRB, FN1	84.3658
GOTERM_BP_FAT	GO:0048147~negative regulation of fibroblast proliferation	3	PAWR, FTH1, SOD2	86.6338
Annotation Cluster 59	Enrichment Score: 1.6043860750142702
Category	Term	Count	Genes	FDR
GOTERM_BP_FAT	GO:0032963~collagen metabolic process	7	PDGFRB, TGFBR3, COL1A1, MMP14, MMP2, SERPINH1, COL5A1	3.45579
GOTERM_BP_FAT	GO:0044259~multicellular organismal macromolecule metabolic process	7	PDGFRB, TGFBR3, COL1A1, MMP14, MMP2, SERPINH1, COL5A1	3.68163
GOTERM_BP_FAT	GO:0044236~multicellular organism metabolic process	7	PDGFRB, TGFBR3, COL1A1, MMP14, MMP2, SERPINH1, COL5A1	11.2533
GOTERM_BP_FAT	GO:0032964~collagen biosynthetic process	4	PDGFRB, COL1A1, SERPINH1, COL5A1	42.8746
GOTERM_BP_FAT	GO:0060343~trabecula formation	3	TGFBR3, COL1A1, MMP2	75.3925
GOTERM_BP_FAT	GO:0061383~trabecula morphogenesis	3	TGFBR3, COL1A1, MMP2	99.1016
GOTERM_BP_FAT	GO:0043627~response to estrogen	3	PDGFRB, MMP14, MMP2	100
Annotation Cluster 60	Enrichment Score: 1.5998703510652919
Category	Term	Count	Genes	FDR
GOTERM_BP_FAT	GO:0014066~regulation of phosphatidylinositol 3-kinase signaling	6	IGF1R, SERPINE2, PDGFRB, JAK2, CAT, SLC9A3R1	20.7198
GOTERM_BP_FAT	GO:0048015~phosphatidylinositol-mediated signaling	7	IGF1R, SERPINE2, PDGFRA, PDGFRB, JAK2, CAT, SLC9A3R1	30.9743
GOTERM_BP_FAT	GO:0048017~inositol lipid-mediated signaling	7	IGF1R, SERPINE2, PDGFRA, PDGFRB, JAK2, CAT, SLC9A3R1	33.6609
GOTERM_BP_FAT	GO:0014065~phosphatidylinositol 3-kinase signaling	6	IGF1R, SERPINE2, PDGFRB, JAK2, CAT, SLC9A3R1	34.8013
GOTERM_BP_FAT	GO:0014068~positive regulation of phosphatidylinositol 3-kinase signaling	4	IGF1R, PDGFRB, JAK2, CAT	82.151
Annotation Cluster 61	Enrichment Score: 1.5674166679669272
Category	Term	Count	Genes	FDR
GOTERM_BP_FAT	GO:0030162~regulation of proteolysis	23	GLG1, XDH, NOL3, LXN, C3, CRYAB, SERPINB1A, GAS1, PAWR, TIMP2, PLAUR, SERPINB9, SERPINE2, TMEM59, RIPK2, JAK2, DDA1, SH3D19, ANTXR1, DAP, FAS, THBS1, ADAM9	0.98374
GOTERM_BP_FAT	GO:0052547~regulation of peptidase activity	16	XDH, NOL3, LXN, CRYAB, SERPINB1A, PAWR, TIMP2, PLAUR, SERPINB9, SERPINE2, RIPK2, JAK2, FAS, DAP, ANTXR1, THBS1	1.44067
GOTERM_BP_FAT	GO:0052548~regulation of endopeptidase activity	12	XDH, SERPINB9, NOL3, CRYAB, RIPK2, JAK2, PAWR, FAS, DAP, TIMP2, THBS1, PLAUR	7.56628
GOTERM_BP_FAT	GO:0006508~proteolysis	40	XDH, GLG1, AEBP1, NPEPL1, LXN, C3, SERPINB1A, MME, ANPEP, PAWR, TIMP2, MMP2, PGPEP1, CASP3, SERPINE2, TMEM59, VPS4A, DDA1, DAP, FAS, THBS1, ADAM9, AGA, KIF14, NOL3, CRYAB, SCRN1, GAS1, MMP14, PLAUR, DNPEP, CTSL, SERPINB9, CPE, RIPK2, JAK2, SH3D19, TGFB1I1, ANTXR1, RNPEP	8.8464
GOTERM_BP_FAT	GO:0045861~negative regulation of proteolysis	12	GLG1, SERPINB9, NOL3, SERPINE2, CRYAB, LXN, TMEM59, SERPINB1A, GAS1, TIMP2, THBS1, PLAUR	14.5399
GOTERM_BP_FAT	GO:2000116~regulation of cysteine-type endopeptidase activity	10	XDH, NOL3, CRYAB, RIPK2, JAK2, PAWR, FAS, DAP, THBS1, PLAUR	18.0622
GOTERM_BP_FAT	GO:0043086~negative regulation of catalytic activity	20	NOL3, LXN, CRYAB, ANXA1, SERPINB1A, TIMP2, FARP1, PLAUR, THY1, SERPINB9, IGF1R, CASP3, ATP2B4, SERPINE2, FABP4, HSPB1, THBS1, NQO1, URI1, MVP	21.0575
GOTERM_BP_FAT	GO:0043281~regulation of cysteine-type endopeptidase activity involved in apoptotic process	9	XDH, NOL3, CRYAB, RIPK2, JAK2, FAS, DAP, THBS1, PLAUR	25.0876
GOTERM_BP_FAT	GO:0010466~negative regulation of peptidase activity	9	SERPINB9, NOL3, SERPINE2, CRYAB, LXN, SERPINB1A, TIMP2, THBS1, PLAUR	39.3763
GOTERM_BP_FAT	GO:0051346~negative regulation of hydrolase activity	12	SERPINB9, NOL3, SERPINE2, CRYAB, LXN, ANXA1, SERPINB1A, TIMP2, URI1, THBS1, FARP1, PLAUR	50.9778
GOTERM_BP_FAT	GO:0010951~negative regulation of endopeptidase activity	6	SERPINB9, NOL3, CRYAB, TIMP2, THBS1, PLAUR	69.4463
GOTERM_BP_FAT	GO:0010952~positive regulation of peptidase activity	6	XDH, JAK2, PAWR, FAS, ANTXR1, DAP	69.4463
GOTERM_BP_FAT	GO:0045862~positive regulation of proteolysis	9	XDH, C3, JAK2, PAWR, SH3D19, FAS, ANTXR1, DAP, ADAM9	75.5596
GOTERM_BP_FAT	GO:2001056~positive regulation of cysteine-type endopeptidase activity	5	XDH, JAK2, PAWR, FAS, DAP	92.9646
GOTERM_BP_FAT	GO:0043154~negative regulation of cysteine-type endopeptidase activity involved in apoptotic process	4	NOL3, CRYAB, THBS1, PLAUR	95.0231
GOTERM_BP_FAT	GO:0010950~positive regulation of endopeptidase activity	5	XDH, JAK2, PAWR, FAS, DAP	95.233
GOTERM_BP_FAT	GO:2000117~negative regulation of cysteine-type endopeptidase activity	4	NOL3, CRYAB, THBS1, PLAUR	98.6362
GOTERM_BP_FAT	GO:0043280~positive regulation of cysteine-type endopeptidase activity involved in apoptotic process	4	XDH, JAK2, FAS, DAP	99.6936
GOTERM_BP_FAT	GO:0006919~activation of cysteine-type endopeptidase activity involved in apoptotic process	3	XDH, JAK2, DAP	99.8982
Annotation Cluster 62	Enrichment Score: 1.5361331167531558
Category	Term	Count	Genes	FDR
GOTERM_BP_FAT	GO:0050954~sensory perception of mechanical stimulus	10	EYA4, CASP3, SERPINE2, SLC12A2, MAP1A, COL2A1, COL1A1, PAWR, SLC9A3R1, SOD2	4.2815
Annotation Cluster 1	Enrichment Score: 21.500470233872107
Category	Term	Count	Genes	FDR
GOTERM_CC_FAT	GO:1903561~extracellular vesicle	131	GNA14, LDHB, ATP1B1, LTBP2, IL6ST, TUBB2A, PTGS1, PGD, CSPG4, PDLIM2, FSTL1, CXCL12, ACTG2, SERPINE2, RRAS, COL12A1, VPS4A, FAS, NQO1, NQO2, ADAM9, CRYAB, MGP, THY1, PLAUR, PGLS, CHID1, CPE, COL1A2, ABAT, PDGFRB, HSPB1, MVP, GLG1, ACADSB, MME, MAPKAPK2, TIMP2, SERPINH1, FTH1, PFN2, GMPPA, IDH1, GLO1, ARHGDIB, FN1, COL18A1, CPNE8, PTGR1, IL1RN, S100A10, GLOD4, CSRP1, ACPP, LCN2, P2RX4, COL14A1, PP…	3.1795e-23
GOTERM_CC_FAT	GO:0043230~extracellular organelle	131	GNA14, LDHB, ATP1B1, LTBP2, IL6ST, TUBB2A, PTGS1, PGD, CSPG4, PDLIM2, FSTL1, CXCL12, ACTG2, SERPINE2, RRAS, COL12A1, VPS4A, FAS, NQO1, NQO2, ADAM9, CRYAB, MGP, THY1, PLAUR, PGLS, CHID1, CPE, COL1A2, ABAT, PDGFRB, HSPB1, MVP, GLG1, ACADSB, MME, MAPKAPK2, TIMP2, SERPINH1, FTH1, PFN2, GMPPA, IDH1, GLO1, ARHGDIB, FN1, COL18A1, CPNE8, PTGR1, IL1RN, S100A10, GLOD4, CSRP1, ACPP, LCN2, P2RX4, COL14A1, PP…	4.10042e-23
GOTERM_CC_FAT	GO:0070062~extracellular exosome	130	GNA14, LDHB, ATP1B1, LTBP2, IL6ST, TUBB2A, PTGS1, PGD, CSPG4, PDLIM2, FSTL1, CXCL12, ACTG2, RRAS, COL12A1, VPS4A, FAS, NQO1, NQO2, ADAM9, CRYAB, MGP, PLAUR, THY1, PGLS, CHID1, CPE, COL1A2, ABAT, PDGFRB, HSPB1, MVP, GLG1, ACADSB, MME, MAPKAPK2, TIMP2, SERPINH1, FTH1, PFN2, GMPPA, IDH1, GLO1, ARHGDIB, FN1, COL18A1, CPNE8, PTGR1, IL1RN, S100A10, GLOD4, CSRP1, ACPP, LCN2, P2RX4, COL14A1, PPIC, ALDH2,…	7.06106e-23
GOTERM_CC_FAT	GO:0031988~membrane-bounded vesicle	143	GNA14, LDHB, ATP1B1, LTBP2, IL6ST, TUBB2A, PTGS1, PGD, CSPG4, PDLIM2, FSTL1, CXCL12, ACTG2, SERPINE2, RRAS, COL12A1, VPS4A, FAS, NQO1, FNDC3A, NQO2, ADAM9, EGFR, CRYAB, MGP, THY1, PLAUR, PGLS, CHID1, CPE, COL1A2, ABAT, PDGFRB, HSPB1, COL1A1, MVP, GLG1, ACADSB, MME, MAPKAPK2, TIMP2, SERPINH1, FTH1, PFN2, GMPPA, IDH1, AHNAK2, GLO1, ARHGDIB, FN1, COL18A1, CPNE8, PTGR1, IL1RN, S100A10, GLOD4, CSRP1, …	4.93403e-19
GOTERM_CC_FAT	GO:0044421~extracellular region part	146	GNA14, LDHB, ATP1B1, LTBP2, IL6ST, TUBB2A, PTGS1, PGD, CSPG4, PDLIM2, FSTL1, MMP2, CXCL12, ACTG2, PTGIS, SERPINE2, RRAS, COL12A1, VPS4A, FAS, LOX, NQO1, NQO2, ADAM9, CRYAB, MGP, THY1, PLAUR, PGLS, CHID1, CPE, COL1A2, ABAT, PDGFRB, HSPB1, COL1A1, MVP, GLG1, XDH, ACADSB, MME, MAPKAPK2, TIMP2, SERPINH1, FTH1, PFN2, GMPPA, IDH1, GLO1, ARHGDIB, FN1, COL18A1, CPNE8, PTGR1, IL1RN, S100A10, GLOD4, CSRP1,…	4.07461e-15
GOTERM_CC_FAT	GO:0005576~extracellular region	150	GNA14, LDHB, ATP1B1, LTBP2, IL6ST, TUBB2A, PTGS1, PGD, CSPG4, PDLIM2, FSTL1, MMP2, CXCL12, GSTM1, ACTG2, PTGIS, SERPINE2, RRAS, VPS4A, COL12A1, FAS, LOX, NQO1, NQO2, ADAM9, CRYAB, MGP, THY1, PLAUR, PGLS, CHID1, CPE, COL1A2, ABAT, PDGFRB, HSPB1, COL1A1, MVP, GLG1, HSD17B11, XDH, ACADSB, MME, MAPKAPK2, TIMP2, SERPINH1, FTH1, PFN2, GMPPA, IDH1, GLO1, ARHGDIB, FN1, COL18A1, CPNE8, PTGR1, IL1RN, S100A…	4.32321e-11
Annotation Cluster 2	Enrichment Score: 11.120481066875717
Category	Term	Count	Genes	FDR
GOTERM_CC_FAT	GO:0005925~focal adhesion	37	TRIOBP, ENAH, NRP1, TLN2, FHL1, CSPG4, LMO7, PDLIM2, MME, APBB1IP, ANXA6, SORBS3, SORBS1, FAT1, REXO2, TGM2, RRAS, CNN1, CAT, ADAM9, TES, EGFR, LPP, ANXA1, CSRP1, MMP14, NEXN, PALLD, CSRP2, VASP, THY1, PLAUR, LRP1, CD81, PDGFRB, HSPB1, TGFB1I1	1.28897e-11
GOTERM_CC_FAT	GO:0005924~cell-substrate adherens junction	37	TRIOBP, ENAH, NRP1, TLN2, FHL1, CSPG4, LMO7, PDLIM2, MME, APBB1IP, ANXA6, SORBS3, SORBS1, FAT1, REXO2, TGM2, RRAS, CNN1, CAT, ADAM9, TES, EGFR, LPP, ANXA1, CSRP1, MMP14, NEXN, PALLD, CSRP2, VASP, THY1, PLAUR, LRP1, CD81, PDGFRB, HSPB1, TGFB1I1	1.91736e-11
GOTERM_CC_FAT	GO:0030055~cell-substrate junction	37	TRIOBP, ENAH, NRP1, TLN2, FHL1, CSPG4, LMO7, PDLIM2, MME, APBB1IP, ANXA6, SORBS3, SORBS1, FAT1, REXO2, TGM2, RRAS, CNN1, CAT, ADAM9, TES, EGFR, LPP, ANXA1, CSRP1, MMP14, NEXN, PALLD, CSRP2, VASP, THY1, PLAUR, LRP1, CD81, PDGFRB, HSPB1, TGFB1I1	2.81442e-11
GOTERM_CC_FAT	GO:0005912~adherens junction	43	TRIOBP, ENAH, NRP1, TLN2, FHL1, PDLIM5, WASF2, CSPG4, LMO7, PDLIM2, MME, APBB1IP, ANXA6, SORBS3, SORBS1, FAT1, BAG3, REXO2, TGM2, IDH1, RRAS, CAT, CNN1, ADAM9, TES, EGFR, LPP, ANXA1, GLOD4, CSRP1, NEXN, PALLD, MMP14, CSRP2, VASP, THY1, PLAUR, LRP1, PKP2, CD81, PDGFRB, HSPB1, TGFB1I1	7.71076e-08
GOTERM_CC_FAT	GO:0070161~anchoring junction	43	TRIOBP, ENAH, NRP1, TLN2, FHL1, PDLIM5, WASF2, CSPG4, LMO7, PDLIM2, MME, APBB1IP, ANXA6, SORBS3, SORBS1, FAT1, BAG3, REXO2, TGM2, IDH1, RRAS, CAT, CNN1, ADAM9, TES, EGFR, LPP, ANXA1, GLOD4, CSRP1, NEXN, PALLD, MMP14, CSRP2, VASP, THY1, PLAUR, LRP1, PKP2, CD81, PDGFRB, HSPB1, TGFB1I1	1.73353e-07
GOTERM_CC_FAT	GO:0030054~cell junction	52	ATP1B1, ENAH, NRP1, TLN2, PDLIM5, WASF2, CSPG4, LMO7, PDLIM2, ANK3, BAG3, RRAS, CAT, ADAM9, EGFR, PTPRK, PALLD, NEXN, MMP14, MYADM, FARP1, VASP, THY1, PLAUR, CD81, HSPB1, PDGFRB, TGFB1I1, TRIOBP, FHL1, MME, APBB1IP, ANXA6, SORBS3, SORBS1, FAT1, REXO2, TGM2, IDH1, EMB, CNN1, SYNPO, TES, LPP, ANXA1, GLOD4, CSRP1, CSRP2, P2RX4, LRP1, PKP2, KCTD12	0.0164677
Annotation Cluster 3	Enrichment Score: 4.552001233912146
Category	Term	Count	Genes	FDR
GOTERM_CC_FAT	GO:0030017~sarcomere	16	CRYAB, PPP1R12B, PDLIM5, PALLD, TPM2, NEXN, TPM1, MMP2, MYL9, ATP2B4, ANK3, BAG3, HSPB1, AHNAK2, LMOD1, SYNPO	0.0114737
GOTERM_CC_FAT	GO:0044449~contractile fiber part	16	CRYAB, PPP1R12B, PDLIM5, PALLD, TPM2, NEXN, TPM1, MMP2, MYL9, ATP2B4, ANK3, BAG3, HSPB1, AHNAK2, LMOD1, SYNPO	0.0219854
GOTERM_CC_FAT	GO:0030016~myofibril	16	CRYAB, PPP1R12B, PDLIM5, PALLD, TPM2, NEXN, TPM1, MMP2, MYL9, ATP2B4, ANK3, BAG3, HSPB1, AHNAK2, LMOD1, SYNPO	0.0403085
GOTERM_CC_FAT	GO:0030018~Z disc	12	ATP2B4, CRYAB, ANK3, PDLIM5, BAG3, PPP1R12B, AHNAK2, HSPB1, NEXN, PALLD, MYL9, SYNPO	0.0462503
GOTERM_CC_FAT	GO:0043292~contractile fiber	16	CRYAB, PPP1R12B, PDLIM5, PALLD, TPM2, NEXN, TPM1, MMP2, MYL9, ATP2B4, ANK3, BAG3, HSPB1, AHNAK2, LMOD1, SYNPO	0.0675856
GOTERM_CC_FAT	GO:0031674~I band	12	ATP2B4, CRYAB, ANK3, PDLIM5, BAG3, PPP1R12B, AHNAK2, HSPB1, NEXN, PALLD, MYL9, SYNPO	0.123451
Annotation Cluster 4	Enrichment Score: 3.7992040102489866
Category	Term	Count	Genes	FDR
GOTERM_CC_FAT	GO:0098857~membrane microdomain	19	EGFR, LDHB, ATP1B1, S100A10, SLC9A3R1, MYADM, SERPINH1, THY1, IGF1R, CASP3, PTGIS, SORBS1, CPE, JAK2, PLCD1, FAS, EHD2, GPC1, CD14	0.201898
GOTERM_CC_FAT	GO:0045121~membrane raft	19	EGFR, LDHB, ATP1B1, S100A10, SLC9A3R1, MYADM, SERPINH1, THY1, IGF1R, CASP3, PTGIS, SORBS1, CPE, JAK2, PLCD1, FAS, EHD2, GPC1, CD14	0.201898
GOTERM_CC_FAT	GO:0098589~membrane region	21	EGFR, LDHB, ATP1B1, CLTB, S100A10, SLC9A3R1, SERPINH1, MYADM, THY1, IGF1R, CASP3, PTGIS, LRP1, SORBS1, CPE, JAK2, PLCD1, FAS, EHD2, GPC1, CD14	0.277916
Annotation Cluster 5	Enrichment Score: 3.6788578032196164
Category	Term	Count	Genes	FDR
GOTERM_CC_FAT	GO:0031012~extracellular matrix	27	GLG1, AEBP1, LTBP2, COL3A1, COL2A1, TIMP2, MMP2, SERPINE2, TGM2, COL12A1, LOX, THBS1, GPC1, FN1, COL18A1, FBN1, MGP, NID1, MMP14, COL5A1, COL14A1, COL1A2, TGFBR3, HSPB1, VCAN, TGFB1I1, COL1A1	0.0175365
GOTERM_CC_FAT	GO:0098643~banded collagen fibril	5	COL3A1, COL1A2, COL2A1, COL1A1, COL5A1	0.0900363
GOTERM_CC_FAT	GO:0005583~fibrillar collagen trimer	5	COL3A1, COL1A2, COL2A1, COL1A1, COL5A1	0.0900363
GOTERM_CC_FAT	GO:0005578~proteinaceous extracellular matrix	20	GLG1, COL18A1, LTBP2, COL3A1, FBN1, COL2A1, NID1, TIMP2, MMP2, COL5A1, COL14A1, TGM2, COL1A2, TGFBR3, COL12A1, VCAN, LOX, COL1A1, GPC1, FN1	0.132297
GOTERM_CC_FAT	GO:0044420~extracellular matrix component	11	COL18A1, COL3A1, FBN1, COL1A2, COL12A1, COL2A1, NID1, COL1A1, TIMP2, COL5A1, FN1	0.440214
GOTERM_CC_FAT	GO:0005581~collagen trimer	9	COL18A1, COL14A1, COL3A1, COL1A2, COL12A1, COL2A1, COL1A1, LOX, COL5A1	0.504484
GOTERM_CC_FAT	GO:0098644~complex of collagen trimers	5	COL3A1, COL1A2, COL2A1, COL1A1, COL5A1	0.630903
GOTERM_CC_FAT	GO:0005604~basement membrane	7	COL18A1, FBN1, COL2A1, NID1, TIMP2, COL5A1, FN1	20.3239
Annotation Cluster 6	Enrichment Score: 3.6709556782965738
Category	Term	Count	Genes	FDR
GOTERM_CC_FAT	GO:0045177~apical part of cell	23	EGFR, ATP1B1, SLC12A2, GM2A, OSMR, CSPG4, ANXA1, LMO7, SLC9A3R1, ACPP, THY1, ABCG2, SLC11A2, VCAM1, ANXA6, CTSL, P2RX4, CD81, PDGFRB, FAS, DCXR, MGST1, FN1	0.044591
GOTERM_CC_FAT	GO:0098590~plasma membrane region	37	ATP1B1, CLTB, OSMR, PDLIM5, CSPG4, LMO7, TPM1, KANK1, SLC11A2, ANXA6, IGF1R, PTGIS, ATP2B4, SORBS1, ANK3, FAS, EHD2, ADAM9, SYNPO, FN1, EGFR, SLC12A2, CRYAB, ANXA1, SLC9A3R1, VASP, THY1, ABCG2, CPE, CD81, PDGFRB, ABCC4, HSPB1, JAK2, ANTXR1, DCXR, KCTD12	0.503448
GOTERM_CC_FAT	GO:0016324~apical plasma membrane	17	EGFR, ATP1B1, SLC12A2, OSMR, CSPG4, ANXA1, LMO7, SLC9A3R1, ABCG2, THY1, ANXA6, SLC11A2, CD81, PDGFRB, FAS, DCXR, FN1	1.21764
Annotation Cluster 7	Enrichment Score: 3.110772488684477
Category	Term	Count	Genes	FDR
GOTERM_CC_FAT	GO:0098552~side of membrane	25	GNA14, SNX18, GM2A, OSMR, IL6ST, ANPEP, GNG12, CXCL12, LY6A, VCAM1, SERPINE2, FAS, THBS1, ADAM9, GNAO1, ANXA1, FARP1, THY1, CTSL, PDGFRA, TGFBR3, JAK2, ANTXR1, RNPEP, CD14	0.171052
GOTERM_CC_FAT	GO:0009897~external side of plasma membrane	18	OSMR, IL6ST, ANXA1, ANPEP, CXCL12, THY1, VCAM1, LY6A, CTSL, SERPINE2, PDGFRA, TGFBR3, FAS, ANTXR1, THBS1, RNPEP, CD14, ADAM9	0.572564
GOTERM_CC_FAT	GO:0009986~cell surface	29	NRP1, IL6ST, OSMR, CSPG4, ANPEP, TIMP2, CXCL12, SLC11A2, LY6A, VCAM1, SERPINE2, ANK3, FAS, THBS1, ADAM9, EGFR, PTPRK, CRYAB, ANXA1, MXRA8, THY1, CTSL, PDGFRA, PDGFRB, TGFBR3, VCAN, ANTXR1, RNPEP, CD14	12.6319
Annotation Cluster 8	Enrichment Score: 2.7942067752455504
Category	Term	Count	Genes	FDR
GOTERM_CC_FAT	GO:0030175~filopodium	10	VCAM1, ACTG2, ENAH, FAT1, ANTXR1, SLC9A3R1, PALLD, VASP, ACPP, FARP1	0.232852
GOTERM_CC_FAT	GO:0031252~cell leading edge	17	PTPRK, ENAH, TLN2, LMO4, WASF2, CSPG4, ARPIN, PALLD, SLC9A3R1, APBB1IP, TPM1, MYADM, KANK1, VASP, ACTG2, FAT1, ANTXR1	4.50118
GOTERM_CC_FAT	GO:0030027~lamellipodium	10	ACTG2, ENAH, FAT1, WASF2, CSPG4, ANTXR1, ARPIN, PALLD, APBB1IP, VASP	10.4327
Annotation Cluster 9	Enrichment Score: 2.760254731833945
Category	Term	Count	Genes	FDR
GOTERM_CC_FAT	GO:0032432~actin filament bundle	8	ENAH, SORBS1, CRYAB, PDLIM2, PALLD, TPM1, MYL9, SYNPO	0.862353
GOTERM_CC_FAT	GO:0001725~stress fiber	7	ENAH, SORBS1, PDLIM2, PALLD, TPM1, MYL9, SYNPO	2.77913
GOTERM_CC_FAT	GO:0097517~contractile actin filament bundle	7	ENAH, SORBS1, PDLIM2, PALLD, TPM1, MYL9, SYNPO	2.77913
GOTERM_CC_FAT	GO:0042641~actomyosin	7	ENAH, SORBS1, PDLIM2, PALLD, TPM1, MYL9, SYNPO	5.19859
Annotation Cluster 10	Enrichment Score: 2.1447434177647096
Category	Term	Count	Genes	FDR
GOTERM_CC_FAT	GO:0000323~lytic vacuole	22	AGA, EPDR1, GM2A, ANXA1, ANPEP, ITM2C, FTH1, ACPP, TMEM55A, SLC11A2, ANXA6, P2RX4, CTSL, CHID1, LRP1, ANK3, TMEM59, PDGFRB, VPS4A, CAT, CP, FYCO1	0.624704
GOTERM_CC_FAT	GO:0005764~lysosome	22	AGA, EPDR1, GM2A, ANXA1, ANPEP, ITM2C, FTH1, ACPP, TMEM55A, SLC11A2, ANXA6, P2RX4, CTSL, CHID1, LRP1, ANK3, TMEM59, PDGFRB, VPS4A, CAT, CP, FYCO1	0.624704
GOTERM_CC_FAT	GO:0005773~vacuole	36	STEAP4, SNX18, NRP1, GM2A, EPDR1, WASF2, ANPEP, VPS37C, ITM2B, ITM2C, FTH1, SLC11A2, VCAM1, ANXA6, ANK3, TMEM59, VPS4A, CAT, EHD2, FYCO1, GPC1, EGFR, AGA, RAB4B, GOLIM4, ANXA1, MMP14, ACPP, TMEM55A, P2RX4, RAB32, CTSL, LRP1, CHID1, PDGFRB, CP	4.1505
GOTERM_CC_FAT	GO:0044437~vacuolar part	19	EGFR, SNX18, ANXA1, GOLIM4, VPS37C, ANPEP, ITM2B, ITM2C, ACPP, TMEM55A, SLC11A2, ANXA6, P2RX4, LRP1, TMEM59, PDGFRB, VPS4A, CP, EHD2	19.8909
GOTERM_CC_FAT	GO:0005768~endosome	24	EGFR, STEAP4, SNX18, NRP1, WASF2, RAB4B, ANXA1, GOLIM4, VPS37C, ITM2B, MMP14, ACPP, TMEM55A, SLC11A2, VCAM1, ANXA6, RAB32, CHID1, LRP1, TMEM59, VPS4A, EHD2, FYCO1, GPC1	20.5751
GOTERM_CC_FAT	GO:0005774~vacuolar membrane	18	EGFR, SNX18, ANXA1, GOLIM4, VPS37C, ANPEP, ITM2B, ITM2C, ACPP, TMEM55A, SLC11A2, ANXA6, P2RX4, LRP1, TMEM59, VPS4A, CP, EHD2	25.7707
GOTERM_CC_FAT	GO:0098852~lytic vacuole membrane	10	SLC11A2, ANXA6, P2RX4, LRP1, TMEM59, ANPEP, CP, ITM2C, ACPP, TMEM55A	49.9364
GOTERM_CC_FAT	GO:0005765~lysosomal membrane	10	SLC11A2, ANXA6, P2RX4, LRP1, TMEM59, ANPEP, CP, ITM2C, ACPP, TMEM55A	49.9364
Annotation Cluster 11	Enrichment Score: 1.746760876527798
Category	Term	Count	Genes	FDR
GOTERM_CC_FAT	GO:0036477~somatodendritic compartment	31	SNX18, NRP1, IL6ST, CALD1, MME, PAWR, TIMP2, EPHB3, IGF1R, SERPINE2, ANK3, FAS, KIF21A, ACSL4, NQO1, GPC1, TUBB3, SYNPO, GLRX, PTPRK, GNAO1, CRYAB, PALLD, FARP1, THY1, P2RX4, CTSL, LRP1, CPE, HSPB1, URI1	6.03223
GOTERM_CC_FAT	GO:0044297~cell body	26	SNX18, NRP1, RBP1, IL6ST, CALD1, PAWR, TIMP2, IGF1R, ACTG2, SERPINE2, FAS, ACSL4, NQO1, GPC1, TUBB3, SYNPO, GLRX, PTPRK, GNAO1, CRYAB, PALLD, P2RX4, CTSL, LRP1, CPE, HSPB1	6.14461
Annotation Cluster 1	Enrichment Score: 4.785630956887533
Category	Term	Count	Genes	FDR
GOTERM_MF_FAT	GO:0043167~ion binding	106	GNA14, ATP1B1, LTBP2, PDLIM5, LMO4, PGD, PTGS1, LMO7, PDLIM2, FSTL1, MMP2, GSTM1, PTGIS, ATP2B4, LOX, NQO2, ADAM9, CRYAB, MGP, CPE, COL1A2, ABAT, COL1A1, TGFB1I1, XDH, ARFGAP3, CYP1B1, MME, TIMP2, FTH1, MYL9, SLC11A2, CSAD, IDH1, CDA, GLO1, FN1, COL18A1, PTGR1, CRIP1, SESTD1, LPP, S100A10, CSRP1, CSRP2, ACPP, FOXP1, LCN2, P2RX4, PLA2G4A, ZC2HC1A, FABP4, ANTXR1, PON3, STEAP4, NPEPL1, AEBP1, NRP1, …	0.00589309
GOTERM_MF_FAT	GO:0043169~cation binding	99	GNA14, ATP1B1, LTBP2, PDLIM5, LMO4, PTGS1, PDLIM2, LMO7, FSTL1, MMP2, GSTM1, PTGIS, ATP2B4, LOX, NQO2, ADAM9, CRYAB, MGP, CPE, COL1A2, ABAT, COL1A1, TGFB1I1, XDH, ARFGAP3, CYP1B1, MME, TIMP2, FTH1, MYL9, SLC11A2, IDH1, CDA, GLO1, FN1, COL18A1, PTGR1, CRIP1, LPP, S100A10, CSRP1, CSRP2, ACPP, FOXP1, LCN2, P2RX4, PLA2G4A, ZC2HC1A, ANTXR1, PON3, STEAP4, NPEPL1, AEBP1, NRP1, ANPEP, P4HA3, CAT, PLCB1, …	0.0487278
GOTERM_MF_FAT	GO:0046872~metal ion binding	98	GNA14, ATP1B1, LTBP2, PDLIM5, LMO4, PTGS1, PDLIM2, LMO7, FSTL1, MMP2, GSTM1, PTGIS, ATP2B4, LOX, NQO2, ADAM9, CRYAB, MGP, CPE, COL1A2, ABAT, COL1A1, TGFB1I1, XDH, ARFGAP3, CYP1B1, MME, TIMP2, FTH1, MYL9, SLC11A2, IDH1, CDA, GLO1, FN1, COL18A1, PTGR1, CRIP1, LPP, S100A10, CSRP1, CSRP2, FOXP1, LCN2, P2RX4, PLA2G4A, ZC2HC1A, ANTXR1, PON3, STEAP4, NPEPL1, AEBP1, NRP1, ANPEP, P4HA3, CAT, PLCB1, GPC1, …	0.0555099
Annotation Cluster 2	Enrichment Score: 4.207054787913136
Category	Term	Count	Genes	FDR
GOTERM_MF_FAT	GO:0042802~identical protein binding	51	LDHB, ATG101, ATL3, GSTM1, GSTM2, BAG2, CAT, FAS, NQO1, PLCB1, EGFR, ACADM, NOL3, CRYAB, RBPMS, HSPB6, HSPB8, RIPK3, PDGFRA, COL1A2, HSPB1, RIPK2, ABAT, COL1A1, OAT, XDH, CAMK2G, PRRC1, TPM1, APLP2, ANXA6, IGF1R, OXCT1, IDH1, CDA, FN1, CEBPB, ANXA1, AK3, S100A10, ACPP, FOXP1, CPT1A, SOD2, ABCG2, LCN2, ALDH2, GAMT, SSNA1, MGST1, PON3	2.31141e-05
GOTERM_MF_FAT	GO:0042803~protein homodimerization activity	27	XDH, CAMK2G, TPM1, GSTM1, ANXA6, GSTM2, OXCT1, CDA, IDH1, CAT, PLCB1, CEBPB, CRYAB, ANXA1, S100A10, ACPP, FOXP1, ABCG2, LCN2, RBPMS, HSPB6, PDGFRA, RIPK2, ABAT, GAMT, MGST1, PON3	1.19896
GOTERM_MF_FAT	GO:0046983~protein dimerization activity	31	XDH, IL6ST, CAMK2G, CRLF1, TPM1, GSTM1, ANXA6, GSTM2, OXCT1, CDA, IDH1, CAT, PLCB1, EGFR, CEBPB, CRYAB, ANXA1, S100A10, ACPP, FOXP1, ABCG2, LCN2, RBPMS, HSPB6, PDGFRA, ABAT, RIPK2, PBX1, GAMT, MGST1, PON3	26.9916
Annotation Cluster 3	Enrichment Score: 4.013567737514344
Category	Term	Count	Genes	FDR
GOTERM_MF_FAT	GO:1901681~sulfur compound binding	16	ACADSB, NRP1, ACADM, LTBP2, LXN, FBN1, FSTL1, COL5A1, APLP2, GSTM2, SERPINE2, TGFBR3, THBS1, GPC1, MGST1, FN1	0.015319
GOTERM_MF_FAT	GO:0008201~heparin binding	11	NRP1, SERPINE2, LTBP2, LXN, FBN1, TGFBR3, FSTL1, THBS1, COL5A1, APLP2, FN1	0.323735
GOTERM_MF_FAT	GO:0005539~glycosaminoglycan binding	12	NRP1, SERPINE2, LTBP2, LXN, FBN1, TGFBR3, FSTL1, VCAN, THBS1, COL5A1, APLP2, FN1	0.662894
Annotation Cluster 4	Enrichment Score: 3.9682994175821906
Category	Term	Count	Genes	FDR
GOTERM_MF_FAT	GO:0048037~cofactor binding	18	XDH, LDHB, ACADSB, ACADM, C3, MAOA, MICAL2, PGD, CBR3, CSAD, FMO1, H6PD, AOX1, ALDH2, IDH1, ABAT, CAT, OAT	0.0149568
GOTERM_MF_FAT	GO:0050662~coenzyme binding	14	XDH, LDHB, ACADSB, ACADM, MAOA, MICAL2, PGD, CBR3, FMO1, H6PD, AOX1, ALDH2, IDH1, CAT	0.0650087
GOTERM_MF_FAT	GO:0050660~flavin adenine dinucleotide binding	7	XDH, ACADSB, ACADM, FMO1, MAOA, MICAL2, AOX1	4.54292
Annotation Cluster 5	Enrichment Score: 2.6403389782164473
Category	Term	Count	Genes	FDR
GOTERM_MF_FAT	GO:0005518~collagen binding	8	MAP1A, CSPG4, NID1, ANTXR1, THBS1, GPC1, SERPINH1, ADAM9	0.109131
GOTERM_MF_FAT	GO:0050840~extracellular matrix binding	5	CD248, NID1, THBS1, GPC1, ADAM9	18.1001
GOTERM_MF_FAT	GO:0043236~laminin binding	4	NID1, THBS1, GPC1, ADAM9	18.3065
Annotation Cluster 6	Enrichment Score: 2.2452403758188577
Category	Term	Count	Genes	FDR
GOTERM_MF_FAT	GO:0008238~exopeptidase activity	11	CTSL, NPEPL1, AEBP1, PGPEP1, CPE, SCRN1, MME, ANPEP, MMP14, RNPEP, DNPEP	0.0122277
GOTERM_MF_FAT	GO:0008235~metalloexopeptidase activity	7	NPEPL1, AEBP1, CPE, ANPEP, MMP14, RNPEP, DNPEP	0.437258
GOTERM_MF_FAT	GO:0004177~aminopeptidase activity	6	CTSL, NPEPL1, ANPEP, MMP14, RNPEP, DNPEP	1.05167
GOTERM_MF_FAT	GO:0070006~metalloaminopeptidase activity	4	ANPEP, MMP14, RNPEP, DNPEP	5.34106
GOTERM_MF_FAT	GO:0008237~metallopeptidase activity	10	NPEPL1, AEBP1, CPE, MME, ANPEP, MMP14, MMP2, RNPEP, ADAM9, DNPEP	8.28669
GOTERM_MF_FAT	GO:0008233~peptidase activity	16	AGA, AEBP1, NPEPL1, SCRN1, MME, ANPEP, MMP14, MMP2, DNPEP, CTSL, CASP3, PGPEP1, CPE, TMEM59, RNPEP, ADAM9	96.0397
GOTERM_MF_FAT	GO:0070011~peptidase activity, acting on L-amino acid peptides	15	AEBP1, NPEPL1, SCRN1, MME, ANPEP, MMP14, MMP2, DNPEP, CTSL, CASP3, PGPEP1, CPE, TMEM59, RNPEP, ADAM9	98.145
GOTERM_MF_FAT	GO:0004175~endopeptidase activity	7	CTSL, CASP3, TMEM59, MME, MMP14, MMP2, ADAM9	100
Annotation Cluster 7	Enrichment Score: 2.2240267389137194
Category	Term	Count	Genes	FDR
GOTERM_MF_FAT	GO:0050839~cell adhesion molecule binding	23	EGFR, PDLIM5, COL3A1, WASF2, FBN1, ANXA1, GLOD4, TIMP2, MMP14, VASP, THY1, VCAM1, ANXA7, P2RX4, CPE, ANK3, PKP2, BAG3, IDH1, THBS1, ADAM9, TES, FN1	0.00857058
GOTERM_MF_FAT	GO:0045296~cadherin binding	12	EGFR, P2RX4, PKP2, ANK3, PDLIM5, BAG3, WASF2, ANXA1, IDH1, GLOD4, VASP, TES	16.3283
GOTERM_MF_FAT	GO:0098641~cadherin binding involved in cell-cell adhesion	10	EGFR, PKP2, PDLIM5, BAG3, WASF2, ANXA1, IDH1, GLOD4, VASP, TES	49.1111
GOTERM_MF_FAT	GO:0098632~protein binding involved in cell-cell adhesion	10	EGFR, PKP2, PDLIM5, BAG3, WASF2, ANXA1, IDH1, GLOD4, VASP, TES	54.2736
GOTERM_MF_FAT	GO:0098631~protein binding involved in cell adhesion	10	EGFR, PKP2, PDLIM5, BAG3, WASF2, ANXA1, IDH1, GLOD4, VASP, TES	58.1976
Annotation Cluster 8	Enrichment Score: 2.0600379969554146
Category	Term	Count	Genes	FDR
GOTERM_MF_FAT	GO:0016209~antioxidant activity	7	PTGS1, GPX8, GPX7, CAT, NQO1, MGST1, SOD2	3.17291
GOTERM_MF_FAT	GO:0004601~peroxidase activity	5	PTGS1, GPX8, GPX7, CAT, MGST1	10.137
GOTERM_MF_FAT	GO:0016684~oxidoreductase activity, acting on peroxide as acceptor	5	PTGS1, GPX8, GPX7, CAT, MGST1	13.3654
GOTERM_MF_FAT	GO:0004602~glutathione peroxidase activity	3	GPX8, GPX7, MGST1	48.7665
Annotation Cluster 9	Enrichment Score: 1.8633076001630402
Category	Term	Count	Genes	FDR
GOTERM_MF_FAT	GO:0030234~enzyme regulator activity	28	ARFGAP3, ATP1B1, GM2A, C3, LXN, PPP1R12B, SERPINB1A, ARHGAP35, TIMP2, SERPINH1, APLP2, PFN2, CASP3, ATP2B4, SERPINE2, BAG3, PLCB1, ARHGDIB, FN1, EGFR, TBC1D2B, NOL3, ANXA1, MMP14, THY1, SERPINB9, HSPB1, URI1	4.68623
GOTERM_MF_FAT	GO:0098772~molecular function regulator	33	ARFGAP3, ATP1B1, GM2A, C3, LXN, PPP1R12B, SERPINB1A, ARHGAP35, TIMP2, SERPINH1, APLP2, PFN2, CASP3, ATP2B4, SERPINE2, BAG3, ARHGEF40, PLCB1, ARHGDIB, FN1, EGFR, TBC1D2B, NOL3, IL1RN, ANXA1, SLC9A3R1, MMP14, FARP1, THY1, SERPINB9, HSPB1, URI1, ST5	11.4813
GOTERM_MF_FAT	GO:0004857~enzyme inhibitor activity	14	NOL3, LXN, C3, ANXA1, SERPINB1A, TIMP2, SERPINH1, APLP2, SERPINB9, CASP3, ATP2B4, SERPINE2, HSPB1, URI1	22.2457
GOTERM_MF_FAT	GO:0008047~enzyme activator activity	12	TBC1D2B, ATP1B1, CASP3, ARFGAP3, GM2A, ARHGAP35, TIMP2, PLCB1, MMP14, FN1, ARHGDIB, THY1	75.6912
Annotation Cluster 10	Enrichment Score: 1.83393661143867
Category	Term	Count	Genes	FDR
GOTERM_MF_FAT	GO:0019900~kinase binding	21	KIF14, EGFR, LDHB, PTPRK, CEBPB, NOL3, SLC12A2, PPP1R12B, PDLIM5, CSPG4, PAWR, THY1, GSTM1, SORBS1, PKP2, PDGFRB, HSPB1, JAK2, FAS, ADAM9, MVP	10.7484
GOTERM_MF_FAT	GO:0019899~enzyme binding	46	TRIOBP, LDHB, ATP1B1, PDLIM5, PPP1R12B, CSPG4, PAWR, TIMP2, CKB, GSTM1, GSTM2, CASP3, ATP2B4, SORBS1, VPS4A, FAS, CAT, PLCB1, ADAM9, FN1, ARHGDIB, EGFR, KIF14, PTPRK, TBC1D2B, CEBPB, NOL3, SLC12A2, EPHX1, CYB5A, SLC9A3R1, FARP1, THY1, PLAUR, SOD2, LCN2, SERPINB9, PLA2G4A, LRP1, PKP2, PDGFRB, ABAT, HSPB1, JAK2, VCAN, MVP	14.7296
GOTERM_MF_FAT	GO:0019901~protein kinase binding	17	KIF14, EGFR, PTPRK, SLC12A2, PDLIM5, PPP1R12B, CSPG4, PAWR, THY1, GSTM1, SORBS1, PKP2, PDGFRB, HSPB1, JAK2, ADAM9, MVP	47.776
Annotation Cluster 11	Enrichment Score: 1.7331216026326115
Category	Term	Count	Genes	FDR
GOTERM_MF_FAT	GO:0005546~phosphatidylinositol-4,5-bisphosphate binding	6	SNX18, PFN2, SESTD1, PLCD1, PLCB1, PHLDA3	5.01076
GOTERM_MF_FAT	GO:1902936~phosphatidylinositol bisphosphate binding	6	SNX18, PFN2, SESTD1, PLCD1, PLCB1, PHLDA3	6.136
GOTERM_MF_FAT	GO:0005543~phospholipid binding	13	SNX18, SESTD1, ANXA1, ARHGAP35, THY1, ANXA6, ANXA7, PLA2G4A, PFN2, PLCD1, THBS1, PLCB1, PHLDA3	16.9303
GOTERM_MF_FAT	GO:0008289~lipid binding	19	SNX18, RBP1, SESTD1, C3, PTGS1, ANXA1, ARHGAP35, THY1, GSTM1, ANXA6, ANXA7, PLA2G4A, PFN2, FABP4, PLCD1, THBS1, PLCB1, PHLDA3, CD14	36.4932
GOTERM_MF_FAT	GO:1901981~phosphatidylinositol phosphate binding	6	SNX18, PFN2, SESTD1, PLCD1, PLCB1, PHLDA3	60.2772
GOTERM_MF_FAT	GO:0035091~phosphatidylinositol binding	7	SNX18, PFN2, SESTD1, PLCD1, PLCB1, PHLDA3, THY1	90.6034
Annotation Cluster 12	Enrichment Score: 1.69266628215163
Category	Term	Count	Genes	FDR
GOTERM_MF_FAT	GO:0097367~carbohydrate derivative binding	61	GNA14, ATP1B1, NRP1, LTBP2, LXN, TUBB2A, ATL3, FSTL1, CKB, ACTG2, ATP2B4, SERPINE2, VPS4A, RRAS, GPC1, TUBB3, EGFR, KIF14, RAB4B, THY1, CHID1, RIPK3, PDGFRA, PDGFRB, RIPK2, VCAN, IRGQ, CAMK2G, ARHGAP35, MAPKAPK2, ITM2B, EPHB3, ITM2C, APLP2, ANXA6, IGF1R, ACSL1, TGM2, CDA, ACSL4, THBS1, KIF21A, EHD2, PAPSS2, DCLK1, FN1, CHD3, GNAO1, FBN1, AK3, NID1, BCS1L, COL5A1, ABCG2, P2RX4, RAB32, ABCC4, TGFBR…	0.217009
GOTERM_MF_FAT	GO:0036094~small molecule binding	66	LDHB, GNA14, ATP1B1, TUBB2A, PGD, ATL3, CKB, ACTG2, ATP2B4, BAG3, P4HA3, RRAS, VPS4A, CAT, TUBB3, NT5C, EGFR, KIF14, ACADM, MICAL2, RAB4B, CBR3, RBPMS, PGLS, H6PD, RIPK3, PDGFRA, RIPK2, PDGFRB, IRGQ, XDH, ACADSB, RBP1, CAMK2G, ARHGAP35, MAPKAPK2, EPHB3, ITM2B, ITM2C, ANXA6, IGF1R, PFN2, ACSL1, FMO1, TGM2, IDH1, CDA, ACSL4, KIF21A, EHD2, PAPSS2, DCLK1, CHD3, GNAO1, MAOA, AK3, BCS1L, ABCG2, LCN2, P…	0.826615
GOTERM_MF_FAT	GO:0000166~nucleotide binding	61	LDHB, GNA14, ATP1B1, TUBB2A, PGD, ATL3, CKB, ACTG2, ATP2B4, BAG3, VPS4A, RRAS, CAT, TUBB3, NT5C, EGFR, KIF14, ACADM, MICAL2, RAB4B, CBR3, RBPMS, H6PD, RIPK3, PDGFRA, RIPK2, PDGFRB, IRGQ, XDH, ACADSB, CAMK2G, ARHGAP35, MAPKAPK2, EPHB3, ITM2B, ITM2C, ANXA6, IGF1R, PFN2, ACSL1, FMO1, TGM2, IDH1, ACSL4, KIF21A, EHD2, PAPSS2, DCLK1, CHD3, GNAO1, MAOA, AK3, BCS1L, ABCG2, P2RX4, RAB32, AOX1, ALDH2, ABCC…	1.32497
GOTERM_MF_FAT	GO:1901265~nucleoside phosphate binding	61	LDHB, GNA14, ATP1B1, TUBB2A, PGD, ATL3, CKB, ACTG2, ATP2B4, BAG3, VPS4A, RRAS, CAT, TUBB3, NT5C, EGFR, KIF14, ACADM, MICAL2, RAB4B, CBR3, RBPMS, H6PD, RIPK3, PDGFRA, RIPK2, PDGFRB, IRGQ, XDH, ACADSB, CAMK2G, ARHGAP35, MAPKAPK2, EPHB3, ITM2B, ITM2C, ANXA6, IGF1R, PFN2, ACSL1, FMO1, TGM2, IDH1, ACSL4, KIF21A, EHD2, PAPSS2, DCLK1, CHD3, GNAO1, MAOA, AK3, BCS1L, ABCG2, P2RX4, RAB32, AOX1, ALDH2, ABCC…	1.32497
Category	Term	Count	Genes	FDR
KEGG_PATHWAY	mmu05146:Amoebiasis	13	SERPINB9, GNA14, CASP3, COL3A1, COL1A2, SERPINB1A, HSPB1, COL2A1, COL1A1, PLCB1, COL5A1, CD14, FN1	0.00641791
KEGG_PATHWAY	mmu05205:Proteoglycans in cancer	16	EGFR, PPP1R12B, CAMK2G, MMP2, PLAUR, IGF1R, CTSL, CASP3, ANK3, COL1A2, RRAS, FAS, COL1A1, THBS1, GPC1, FN1	0.0244927
KEGG_PATHWAY	mmu04510:Focal adhesion	16	EGFR, TLN2, PPP1R12B, COL3A1, COL2A1, ARHGAP35, VASP, COL5A1, MYL9, IGF1R, PDGFRA, COL1A2, PDGFRB, COL1A1, THBS1, FN1	0.0308641
KEGG_PATHWAY	mmu04974:Protein digestion and absorption	10	COL18A1, ATP1B1, COL14A1, COL3A1, COL1A2, MME, COL12A1, COL2A1, COL1A1, COL5A1	0.103717
KEGG_PATHWAY	mmu04611:Platelet activation	12	PLA2G4A, TLN2, COL3A1, PTGS1, COL1A2, COL2A1, ARHGAP35, COL1A1, PLCB1, APBB1IP, VASP, COL5A1	0.104971
KEGG_PATHWAY	mmu00280:Valine, leucine and isoleucine degradation	8	ACADSB, ACADM, OXCT1, AOX1, ALDH2, ABAT, ECHS1, AUH	0.16459
KEGG_PATHWAY	mmu00480:Glutathione metabolism	8	GSTM1, GSTM2, PGD, IDH1, ANPEP, GPX8, GPX7, MGST1	0.16459
KEGG_PATHWAY	mmu00071:Fatty acid degradation	7	ACADSB, ACSL1, ACADM, ALDH2, ECHS1, ACSL4, CPT1A	0.62374
KEGG_PATHWAY	mmu04810:Regulation of actin cytoskeleton	13	EGFR, ENAH, PFN2, PPP1R12B, WASF2, PDGFRA, PDGFRB, RRAS, TMSB4X, ARHGAP35, GNG12, MYL9, FN1	1.97391
KEGG_PATHWAY	mmu04146:Peroxisome	8	XDH, ACSL1, ECH1, DHRS4, IDH1, CAT, ACSL4, SOD2	2.05311
KEGG_PATHWAY	mmu01130:Biosynthesis of antibiotics	13	LDHB, ACADM, PGD, AK3, ECHS1, AMPD3, PGLS, GFPT2, ALDH2, IDH1, CAT, PAPSS2, OAT	2.05338
KEGG_PATHWAY	mmu01100:Metabolic pathways	42	XDH, LDHB, ACADSB, PTGS1, PGD, ACOT1, ECHS1, ANPEP, AUH, NDUFB2, CKB, PTGIS, ACSL1, CBR2, CSAD, P4HA3, GMPPA, IDH1, CDA, PLCD1, PLCB1, ACSL4, PAPSS2, NT5C, ACADM, MAOA, CBR3, AMPD3, PGLS, PLA2G4A, DHRS4, H6PD, AOX1, GFPT2, ALDH2, ABAT, CHSY1, GAMT, OAT, GUK1, DCXR, NNMT	2.46697
KEGG_PATHWAY	mmu00980:Metabolism of xenobiotics by cytochrome P450	7	GSTM1, GSTM2, CBR2, CYP1B1, EPHX1, CBR3, MGST1	2.56519
KEGG_PATHWAY	mmu00380:Tryptophan metabolism	6	CYP1B1, MAOA, AOX1, ALDH2, ECHS1, CAT	3.46662
KEGG_PATHWAY	mmu00330:Arginine and proline metabolism	6	MAOA, P4HA3, ALDH2, GAMT, OAT, CKB	4.15475
KEGG_PATHWAY	mmu01212:Fatty acid metabolism	6	ACADSB, ACSL1, ACADM, ECHS1, ACSL4, CPT1A	4.93237
KEGG_PATHWAY	mmu04015:Rap1 signaling pathway	12	EGFR, IGF1R, PFN2, GNAO1, TLN2, PDGFRA, PDGFRB, RRAS, PLCB1, THBS1, APBB1IP, VASP	6.09367

## Sheet: DWDW_214
Protein names	Gene names	Student's T-test Difference KO_WT	EnsemblGeneID	Symbol	logFC_EXP1vsCTR1	FDR_EXP1vsCTR1
Protein AATF	Aatf	-1.51027	ENSMUSG00000018697	Aatf	-0.711	0.00669579
Alpha/beta hydrolase domain-containing protein 17B	Abhd17b	-1.20121	ENSMUSG00000047368	Abhd17b	-1.124	4.66473e-20
Lysophosphatidic acid phosphatase type 6	Acp6	-2.52817	ENSMUSG00000028093	Acp6	-2.284	9.74172e-17
N-acyl-aromatic-L-amino acid amidohydrolase (carboxylate-forming)	Acy3	-1.89393	ENSMUSG00000024866	Acy3	-1.818	0.000503247
Double-stranded RNA-specific adenosine deaminase	Adar	-1.17491	ENSMUSG00000027951	Adar	-2.038	1.7327e-17
tRNA-specific adenosine deaminase 2	Adat2	-2.09859	ENSMUSG00000019808	Adat2	-2.372	2.99925e-22
Alcohol dehydrogenase class 4 mu/sigma chain	Adh7	-3.15677	ENSMUSG00000055301	Adh7	-8.426	1.21022e-246
1,2-dihydroxy-3-keto-5-methylthiopentene dioxygenase	Adi1	-1.4051	ENSMUSG00000020629	Adi1	-1.862	1.16116e-10
1-acyl-sn-glycerol-3-phosphate acyltransferase alpha	Agpat1	-1.45301	ENSMUSG00000034254	Agpat1	-0.398	0.0180573
A-kinase anchor protein 8-like	Akap8l	-1.79281	ENSMUSG00000002625	Akap8l	-1.699	3.9058e-29
Delta-aminolevulinic acid dehydratase	Alad	-1.26241	ENSMUSG00000028393	Alad	-1.588	3.00144e-18
CD166 antigen	Alcam	-4.15978	ENSMUSG00000022636	Alcam	-5.255	2.57135e-116
Amyloid beta A4 precursor protein-binding family A member 3	Apba3	-1.55067	ENSMUSG00000004931	Apba3	-1.4	4.77507e-06
	Apol9a	-3.28768	ENSMUSG00000057346	Apol9a	-3.052	5.61305e-67
Amyloid protein-binding protein 2	Appbp2	-1.15938	ENSMUSG00000018481	Appbp2	-1.166	2.03439e-12
AT-rich interactive domain-containing protein 1A	Arid1a	-1.98454	ENSMUSG00000007880	Arid1a	-1.041	3.74128e-11
ATPase family AAA domain-containing protein 5	Atad5	-1.79846	ENSMUSG00000017550	Atad5	-1.33	6.39069e-20
Serine-protein kinase ATM	Atm	-1.50039	ENSMUSG00000034218	Atm	-0.778	4.01297e-11
Renin receptor	Atp6ap2	-1.50631	ENSMUSG00000031007	Atp6ap2	-0.403	1.32085e-05
Beta-2-microglobulin	B2m	-1.46848	ENSMUSG00000060802	B2m	-0.536	9.14638e-29
Bromodomain adjacent to zinc finger domain protein 1A	Baz1a	-1.28643	ENSMUSG00000035021	Baz1a	-0.887	1.08099e-27
Basigin	Bsg	-2.33081	ENSMUSG00000023175	Bsg	-0.603	6.41272e-11
Bone marrow stromal antigen 2	Bst2	-1.58952	ENSMUSG00000046718	Bst2	-0.914	1.65764e-14
Protein BUD31 homolog	Bud31	-1.16719	ENSMUSG00000038722	Bud31	-1.052	1.49937e-17
Cyclin-H	Ccnh	-1.0406	ENSMUSG00000021548	Ccnh	-0.647	0.000881548
Cyclin-T1	Ccnt1	-1.0015	ENSMUSG00000011960	Ccnt1	-0.839	9.78269e-14
Borealin	Cdca8	-1.16571	ENSMUSG00000028873	Cdca8	-0.82	7.60873e-15
Cadherin-2	Cdh2	-2.9487	ENSMUSG00000024304	Cdh2	-2.569	5.43081e-43
Tumor suppressor ARF	Cdkn2a	-5.67928	ENSMUSG00000044303	Cdkn2a	-4.963	0
CCAAT/enhancer-binding protein zeta	Cebpz	-1.08161	ENSMUSG00000024081	Cebpz	-0.86	7.38595e-26
Ceramide synthase 5	Cers5	-1.16341	ENSMUSG00000023021	Cers5	-0.566	1.08796e-07
Chromatin assembly factor 1 subunit A	Chaf1a	-1.13587	ENSMUSG00000002835	Chaf1a	-1.074	8.72457e-19
Protein CMSS1	Cmss1	-3.0689	ENSMUSG00000022748	Cmss1	-2.033	2.26359e-15
Cap-specific mRNA (nucleoside-2-O-)-methyltransferase 1	Cmtr1	-1.07045	ENSMUSG00000024019	Cmtr1	-2.669	3.70579e-38
Collagen alpha-1(VIII) chain;Vastatin	Col8a1	-1.88719	ENSMUSG00000068196	Col8a1	-0.437	7.34424e-07
Coactosin-like protein	Cotl1	-1.95393	ENSMUSG00000031827	Cotl1	-1.556	2.28731e-25
Cleavage and polyadenylation specificity factor subunit 2	Cpsf2	-1.11984	ENSMUSG00000041781	Cpsf2	-0.989	9.9711e-22
Cellular retinoic acid-binding protein 1	Crabp1	-11.8529	ENSMUSG00000032291	Crabp1	-6.007	0
Cysteine-rich protein 2	Crip2	-5.69303	ENSMUSG00000006356	Crip2	-3.236	2.47055e-38
CWF19-like protein 1	Cwf19l1	-2.11627	ENSMUSG00000025200	Cwf19l1	-0.899	0.00904893
Deoxycytidine kinase	Dck	-1.59276	ENSMUSG00000029366	Dck	-1.855	5.52147e-10
dCTP pyrophosphatase 1	Dctpp1	-1.3441	ENSMUSG00000042462	Dctpp1	-1.087	5.62775e-19
Probable ATP-dependent RNA helicase DDX10	Ddx10	-1.34484	ENSMUSG00000053289	Ddx10	-0.832	1.83524e-17
ATP-dependent RNA helicase DDX24	Ddx24	-1.26058	ENSMUSG00000041645	Ddx24	-0.283	5.05558e-05
Probable ATP-dependent RNA helicase DDX27	Ddx27	-1.01255	ENSMUSG00000017999	Ddx27	-0.963	1.46227e-17
	Ddx31	-2.40255	ENSMUSG00000026806	Ddx31	-0.784	0.00838054
ATP-dependent RNA helicase DDX51	Ddx51	-1.18508	ENSMUSG00000029504	Ddx51	-1.984	2.44968e-07
ATP-dependent RNA helicase DDX54	Ddx54	-1.05763	ENSMUSG00000029599	Ddx54	-1.19	7.18494e-14
ATP-dependent RNA helicase DDX55	Ddx55	-1.76567	ENSMUSG00000029389	Ddx55	-0.989	5.53842e-05
Probable ATP-dependent RNA helicase DDX56	Ddx56	-1.26053	ENSMUSG00000004393	Ddx56	-0.799	3.26957e-08
Probable ATP-dependent RNA helicase DDX58	Ddx58	-1.01696	ENSMUSG00000040296	Ddx58	-0.845	3.77785e-10
	Dhx37	-1.85086	ENSMUSG00000029480	Dhx37	-1.306	0.00010228
Probable ATP-dependent RNA helicase DHX58	Dhx58	-2.77067	ENSMUSG00000017830	Dhx58	-2.026	6.09431e-05
Probable dimethyladenosine transferase	Dimt1	-1.04091	ENSMUSG00000021692	Dimt1	-1.506	0.00387415
2-deoxynucleoside 5-phosphate N-hydrolase 1	Dnph1	-5.40448	ENSMUSG00000040658	Dnph1	-0.766	1.19477e-05
Deoxynucleotidyltransferase terminal-interacting protein 2	Dnttip2	-1.95227	ENSMUSG00000039756	Dnttip2	-0.926	1.54845e-26
Diphthine--ammonia ligase	Dph6	-2.93984	ENSMUSG00000057147	Dph6	-1.108	1.33282e-09
Dipeptidyl peptidase 2	Dpp7	-1.62469	ENSMUSG00000026958	Dpp7	-1.006	3.36745e-05
Kinetochore-associated protein DSN1 homolog	Dsn1	-1.46141	ENSMUSG00000027635	Dsn1	-1.026	0.00430426
Denticleless protein homolog	Dtl	-1.57777	ENSMUSG00000037474	Dtl	-1.281	6.53186e-23
E3 ubiquitin-protein ligase DTX3L	Dtx3l	-1.17672	ENSMUSG00000049502	Dtx3l	-1.521	8.30869e-17
	Dusp9	-1.8034	ENSMUSG00000031383	Dusp9	-2.43	1.36561e-05
Endothelin-converting enzyme 1	Ece1	-1.03622	ENSMUSG00000057530	Ece1	-0.716	9.30103e-06
Enoyl-CoA hydratase domain-containing protein 2, mitochondrial	Echdc2	-1.08157	ENSMUSG00000028601	Echdc2	-1.124	6.34201e-09
Interferon-induced, double-stranded RNA-activated protein kinase	Eif2ak2	-1.22919	ENSMUSG00000024079	Eif2ak2	-1.658	7.17056e-24
Translation initiation factor eIF-2B subunit alpha	Eif2b1	-1.07897	ENSMUSG00000029388	Eif2b1	-1.002	0.000179412
ETS-related transcription factor Elf-2	Elf2	-1.12988	ENSMUSG00000037174	Elf2	-0.793	3.43755e-05
Transcription elongation factor 1 homolog	Elof1	-1.82125	ENSMUSG00000013822	Elof1	-0.299	0.016666
E1A-binding protein p400	Ep400	-2.25233	ENSMUSG00000029505	Ep400	-0.775	4.73547e-07
Endoplasmic reticulum metallopeptidase 1	Ermp1	-1.6392	ENSMUSG00000046324	Ermp1	-1.194	4.35943e-07
ESF1 homolog	Esf1	-2.12024	ENSMUSG00000045624	Esf1	-1.713	2.92295e-116
Histone-lysine N-methyltransferase EZH2	Ezh2	-1.43738	ENSMUSG00000029687	Ezh2	-0.367	0.000116229
Ezrin	Ezr	-2.09149	ENSMUSG00000052397	Ezr	-2.208	7.2915e-06
Junctional adhesion molecule A	F11r	-1.41755	ENSMUSG00000038235	F11r	-4.746	1.45203e-33
Protein FAM107B	Fam107b	-1.805	ENSMUSG00000026655	Fam107b	-1.811	5.22881e-06
FERM, RhoGEF and pleckstrin domain-containing protein 2	Farp2	-1.81425	ENSMUSG00000034066	Farp2	-1.175	0.0382574
Interferon-induced guanylate-binding protein 2	Gbp2	-1.24377	ENSMUSG00000028270	Gbp2	-1.28	2.46282e-08
	Gbp7	-3.13548	ENSMUSG00000040253	Gbp7	-2.407	5.89082e-52
	Gbp9	-1.41772	ENSMUSG00000029298	Gbp9	-2.773	2.31371e-15
Gem-associated protein 2	Gemin2	-1.12749	ENSMUSG00000060121	Gemin2	-1.786	1.20602e-07
Glycolipid transfer protein	Gltp	-1.00633	ENSMUSG00000011884	Gltp	-1.03	1.92933e-06
Gephyrin;Molybdopterin adenylyltransferase;Molybdopterin molybdenumtransferase	Gphn	-3.74486	ENSMUSG00000047454	Gphn	-2.443	7.77367e-19
Retinoic acid-induced protein 3	Gprc5a	-2.20771	ENSMUSG00000046733	Gprc5a	-2.249	1.44661e-22
Transcription initiation factor IIA subunit 1;Transcription initiation factor IIA alpha chain;Transcription initiation factor IIA beta chain	Gtf2a1	-1.33173	ENSMUSG00000020962	Gtf2a1	-0.691	7.72585e-05
	H1fx	-1.14367	ENSMUSG00000044927	H1fx	-1.842	4.01584e-32
H-2 class I histocompatibility antigen, D-B alpha chain	H2-D1	-2.85141	ENSMUSG00000073411	H2-D1	-2.741	3.13908e-298
H-2 class I histocompatibility antigen, K-D alpha chain	H2-K1	-3.77952	ENSMUSG00000061232	H2-K1	-3.128	2.87493e-201
Core histone macro-H2A.1	H2afy	-1.26144	ENSMUSG00000015937	H2afy	-0.325	0.000788917
HAUS augmin-like complex subunit 1	Haus1	-1.49824	ENSMUSG00000041840	Haus1	-1.584	5.42816e-14
	Haus6	-1.46403	ENSMUSG00000038047	Haus6	-1.606	7.38791e-25
Heme-binding protein 1	Hebp1	-2.96414	ENSMUSG00000042770	Hebp1	-2.602	4.55787e-15
Lymphocyte-specific helicase	Hells	-2.1389	ENSMUSG00000025001	Hells	-1.711	2.78794e-130
Helicase with zinc finger domain 2	Helz2	-1.21665	ENSMUSG00000027580	Helz2	-1.907	3.84035e-07
Interferon-induced helicase C domain-containing protein 1	Ifih1	-3.40303	ENSMUSG00000026896	Ifih1	-2.106	9.95943e-21
Interferon-induced protein with tetratricopeptide repeats 1	Ifit1	-2.73805	ENSMUSG00000034459	Ifit1	-2.777	1.03284e-83
Interferon-induced protein with tetratricopeptide repeats 2	Ifit2	-2.32495	ENSMUSG00000045932	Ifit2	-1.16	0.00186973
Interferon-related developmental regulator 1	Ifrd1	-3.85421	ENSMUSG00000001627	Ifrd1	-1.401	2.95606e-52
	Igtp	-4.38111	ENSMUSG00000078853	Igtp	-2.441	1.62439e-23
Interferon-inducible GTPase 1	Iigp1	-3.32237	ENSMUSG00000054072	Iigp1	-1.072	2.05537e-10
Interferon regulatory factor 2-binding protein-like	Irf2bpl	-1.22787	ENSMUSG00000034168	Irf2bpl	-0.523	0.000263246
Interferon regulatory factor 9	Irf9	-1.05943	ENSMUSG00000002325	Irf9	-1.174	1.43797e-22
Ubiquitin-like protein ISG15	Isg15	-2.27479	ENSMUSG00000035692	Isg15	-3.338	2.97082e-197
Inositol-3-phosphate synthase 1	Isyna1	-4.86017	ENSMUSG00000019139	Isyna1	-3.571	2.01096e-37
Integrin alpha-3;Integrin alpha-3 heavy chain;Integrin alpha-3 light chain	Itga3	-1.36326	ENSMUSG00000001507	Itga3	-1.356	1.0673e-08
Protein IWS1 homolog	Iws1	-1.06694	ENSMUSG00000024384	Iws1	-0.729	9.46609e-10
Transcription factor AP-1	Jun	-1.55881	ENSMUSG00000052684	Jun	-0.386	0.0005691
Lysine-specific histone demethylase 1A	Kdm1a	-1.0262	ENSMUSG00000036940	Kdm1a	-0.462	0.00121529
Kinesin-like protein KIF15	Kif15	-1.18853	ENSMUSG00000036768	Kif15	-0.885	2.97165e-20
Galectin;Galectin-3	Lgals3	-7.75989	ENSMUSG00000050335	Lgals3	-5.088	5.91001e-282
Legumain	Lgmn	-2.00183	ENSMUSG00000021190	Lgmn	-1.244	1.15214e-06
Lymphocyte antigen 75	Ly75	-2.86124	ENSMUSG00000026980	Ly75	-2.046	2.05345e-48
LYR motif-containing protein 4	Lyrm4	-1.69956	ENSMUSG00000046573	Lyrm4	-0.802	9.88314e-06
Cell surface glycoprotein MUC18	Mcam	-2.10443	ENSMUSG00000032135	Mcam	-2.099	2.04226e-06
Malignant T-cell-amplified sequence 2	Mcts2	-1.13263	ENSMUSG00000042814	Mcts2	-1.152	6.57289e-06
	Mdn1	-1.33032	ENSMUSG00000058006	Mdn1	-1.55	1.77982e-44
Male-enhanced antigen 1	Mea1	-1.36834	ENSMUSG00000002768	Mea1	-0.947	2.81264e-12
Mediator of RNA polymerase II transcription subunit 12	Med12	-1.83005	ENSMUSG00000079487	Med12	-0.519	0.0152859
Mediator of RNA polymerase II transcription subunit 19	Med19	-1.21346	ENSMUSG00000027080	Med19	-0.337	0.00245095
Mediator of RNA polymerase II transcription subunit 31	Med31	-1.9234	ENSMUSG00000020801	Med31	-1.301	3.47092e-07
7SK snRNA methylphosphate capping enzyme	Mepce	-1.68467	ENSMUSG00000029726	Mepce	-0.681	0.00142989
Mixed lineage kinase domain-like protein	Mlkl	-2.0772	ENSMUSG00000012519	Mlkl	-1.979	4.07122e-13
CDK-activating kinase assembly factor MAT1	Mnat1	-1.15255	ENSMUSG00000021103	Mnat1	-0.697	6.93567e-10
	Morc3	-1.02122	ENSMUSG00000039456	Morc3	-1.088	3.20995e-09
U3 small nucleolar ribonucleoprotein protein MPP10	Mphosph10	-1.16206	ENSMUSG00000030521	Mphosph10	-0.821	7.82428e-16
MAGUK p55 subfamily member 7	Mpp7	-1.25263	ENSMUSG00000057440	Mpp7	-6.887	4.77166e-33
DNA mismatch repair protein Msh3	Msh3	-2.21745	ENSMUSG00000014850	Msh3	-0.722	0.000752327
H/ACA ribonucleoprotein complex non-core subunit NAF1	Naf1	-1.51938	ENSMUSG00000014907	Naf1	-1.023	5.47668e-14
Nicotinamide phosphoribosyltransferase	Nampt	-1.16106	ENSMUSG00000020572	Nampt	-1.162	7.74984e-28
Condensin-2 complex subunit D3	Ncapd3	-1.69545	ENSMUSG00000035024	Ncapd3	-1.028	4.78431e-07
Condensin-2 complex subunit G2	Ncapg2	-1.30931	ENSMUSG00000042029	Ncapg2	-1.454	2.35432e-18
Protein NDRG1	Ndrg1	-1.08589	ENSMUSG00000005125	Ndrg1	-1.863	5.47015e-46
Nestin	Nes	-1.53126	ENSMUSG00000004891	Nes	-1.629	4.25214e-41
Neurofibromin	Nf1	-1.02246	ENSMUSG00000020716	Nf1	-0.612	5.6205e-05
Glycylpeptide N-tetradecanoyltransferase;Glycylpeptide N-tetradecanoyltransferase 2	Nmt2	-1.00265	ENSMUSG00000026643	Nmt2	-0.839	5.52511e-10
Nucleolar complex protein 4 homolog	Noc4l	-1.84757	ENSMUSG00000033294	Noc4l	-1.742	9.40348e-28
Non-POU domain-containing octamer-binding protein	Nono	-4.9411	ENSMUSG00000031311	Nono	-10.046	8.86749e-121
Nucleolar protein 14	Nop14	-1.10141	ENSMUSG00000036693	Nop14	-2.298	2.34837e-171
Neuropilin-2	Nrp2	-1.95213	ENSMUSG00000025969	Nrp2	-3.221	2.15579e-42
	Nsmce4a	-1.17285	ENSMUSG00000040331	Nsmce4a	-0.546	3.03883e-05
Probable 28S rRNA (cytosine-C(5))-methyltransferase	Nsun5	-3.52516	ENSMUSG00000000916	Nsun5	-1.332	0.00802444
Uridine diphosphate glucose pyrophosphatase	Nudt14	-1.40134	ENSMUSG00000002804	Nudt14	-1.155	0.000620211
2-5-oligoadenylate synthase-like protein 2	Oasl2	-2.86588	ENSMUSG00000029561	Oasl2	-2.56	5.40278e-25
Origin recognition complex subunit 2	Orc2	-1.4155	ENSMUSG00000026037	Orc2	-1.305	5.40278e-25
Origin recognition complex subunit 6	Orc6	-1.28148	ENSMUSG00000031697	Orc6	-0.486	0.000575802
	Parp10	-4.06583	ENSMUSG00000063268	Parp10	-1.702	1.74939e-09
Poly [ADP-ribose] polymerase 14	Parp14	-1.05059	ENSMUSG00000034422	Parp14	-1.536	3.73082e-19
Poly [ADP-ribose] polymerase 9	Parp9	-2.41779	ENSMUSG00000022906	Parp9	-1.395	2.45782e-12
Protein RRP5 homolog	Pdcd11	-1.05489	ENSMUSG00000025047	Pdcd11	-1.05	5.36365e-16
PDZ and LIM domain protein 1	Pdlim1	-1.46412	ENSMUSG00000055044	Pdlim1	-1.501	4.27853e-33
Sister chromatid cohesion protein PDS5 homolog B	Pds5b	-1.03199	ENSMUSG00000034021	Pds5b	-0.924	2.83243e-22
Serine/threonine-protein phosphatase PGAM5, mitochondrial	Pgam5	-1.39842	ENSMUSG00000029500	Pgam5	-1.834	4.30599e-18
DNA-directed RNA polymerase I subunit RPA2	Polr1b	-3.19367	ENSMUSG00000027395	Polr1b	-1.304	1.18504e-05
DNA-directed RNA polymerase III subunit RPC8	Polr3h	-1.14586	ENSMUSG00000022476	Polr3h	-1.472	1.81536e-20
Suppressor of SWI4 1 homolog	Ppan	-1.29542	ENSMUSG00000004100	Ppan	-0.971	5.99546e-08
Peptidyl-prolyl cis-trans isomerase F, mitochondrial	Ppif	-1.2847	ENSMUSG00000021868	Ppif	-1.388	1.81194e-05
Peptidyl-prolyl cis-trans isomerase-like 4	Ppil4	-2.36927	ENSMUSG00000015757	Ppil4	-1.246	1.34523e-22
DNA primase small subunit;DNA primase	Prim1	-1.17255	ENSMUSG00000025395	Prim1	-1.24	2.972e-23
DNA primase large subunit	Prim2	-1.02769	ENSMUSG00000026134	Prim2	-1.269	1.67962e-09
Protein kinase C iota type	Prkci	-1.04539	ENSMUSG00000037643	Prkci	-1.067	9.90459e-07
Pre-mRNA-splicing factor 38B	Prpf38b	-1.10963	ENSMUSG00000027881	Prpf38b	-0.838	3.00173e-17
Ribose-phosphate pyrophosphokinase 2	Prps2	-1.5769	ENSMUSG00000025742	Prps2	-1.152	5.49399e-07
Proteasome subunit beta type-8;Proteasome subunit beta type	Psmb8	-1.40948	ENSMUSG00000024338	Psmb8	-1.062	4.15331e-10
Protein-tyrosine-phosphatase;Tyrosine-protein phosphatase non-receptor type 21	Ptpn21	-1.68414	ENSMUSG00000021009	Ptpn21	-1.607	7.23343e-13
tRNA pseudouridine synthase A, mitochondrial;tRNA pseudouridine synthase	Pus1	-1.48581	ENSMUSG00000029507	Pus1	-1.213	5.5159e-05
	Pus7	-1.30874	ENSMUSG00000057541	Pus7	-1.835	6.14479e-34
Periodic tryptophan protein 2 homolog	Pwp2	-1.40533	ENSMUSG00000032834	Pwp2	-1.974	6.18423e-21
Cell cycle checkpoint control protein RAD9A	Rad9a	-1.34675	ENSMUSG00000024824	Rad9a	-3.115	2.69845e-49
Ras association domain-containing protein 1	Rassf1	-1.2159	ENSMUSG00000010067	Rassf1	-1.625	1.20037e-46
Probable RNA-binding protein 19	Rbm19	-1.64697	ENSMUSG00000029594	Rbm19	-1.673	1.94227e-16
RNA-binding protein 25	Rbm25	-1.04983	ENSMUSG00000010608	Rbm25	-0.569	1.61661e-18
N-acylglucosamine 2-epimerase	Renbp	-3.70877	ENSMUSG00000031387	Renbp	-3.34	1.10908e-80
RNA exonuclease 4	Rexo4	-1.30993	ENSMUSG00000052406	Rexo4	-0.841	1.38267e-12
Replication factor C subunit 2	Rfc2	-1.03125	ENSMUSG00000023104	Rfc2	-0.627	0.000386476
E3 ubiquitin-protein ligase RNF213	Rnf213	-1.39195	ENSMUSG00000070327	Rnf213	-1.563	1.77541e-25
Active regulator of SIRT1	Rps19bp1	-1.09992	ENSMUSG00000051518	Rps19bp1	-0.985	2.11902e-24
Ribonucleoside-diphosphate reductase subunit M2	Rrm2	-1.23509	ENSMUSG00000020649	Rrm2	-0.327	0.0463118
RRP12-like protein	Rrp12	-1.11038	ENSMUSG00000035049	Rrp12	-1.753	2.54668e-13
U3 small nucleolar RNA-interacting protein 2	Rrp9	-1.33684	ENSMUSG00000041506	Rrp9	-2.021	3.47039e-33
Probable ribosome biogenesis protein RLP24	Rsl24d1	-1.54666	ENSMUSG00000032215	Rsl24d1	-1.216	1.28304e-14
Receptor-transporting protein 4	Rtp4	-1.96658	ENSMUSG00000033355	Rtp4	-1.839	4.22197e-29
Ribosome maturation protein SBDS	Sbds	-1.00922	ENSMUSG00000025337	Sbds	-1.624	4.2767e-26
Protein strawberry notch homolog 1	Sbno1	-2.06317	ENSMUSG00000038095	Sbno1	-1.087	7.41195e-48
Scavenger receptor class B member 1	Scarb1	-2.6078	ENSMUSG00000037936	Scarb1	-1.156	9.09865e-07
Protein SDA1 homolog	Sdad1	-2.42196	ENSMUSG00000029415	Sdad1	-1.846	5.80841e-54
High affinity cationic amino acid transporter 1	Slc7a1	-1.72169	ENSMUSG00000041313	Slc7a1	-2.964	6.73863e-171
Pre-mRNA-splicing factor SLU7	Slu7	-1.80643	ENSMUSG00000020409	Slu7	-0.799	1.57527e-15
Structural maintenance of chromosomes protein 6	Smc6	-1.73691	ENSMUSG00000020608	Smc6	-0.748	1.58362e-38
Sorting nexin-8	Snx8	-3.33228	ENSMUSG00000029560	Snx8	-2.27	9.20382e-81
	Sptan1	-1.40147	ENSMUSG00000057738	Sptan1	-0.339	0.00126345
Serum response factor-binding protein 1	Srfbp1	-2.21445	ENSMUSG00000024528	Srfbp1	-1.576	6.04333e-05
Signal transducer and activator of transcription;Signal transducer and activator of transcription 1	Stat1	-1.18284	ENSMUSG00000026104	Stat1	-0.687	0.000169425
Polycomb protein Suz12	Suz12	-1.0541	ENSMUSG00000017548	Suz12	-1.085	5.63777e-37
Antigen peptide transporter 1	Tap1	-2.19754	ENSMUSG00000037321	Tap1	-0.827	6.83055e-07
Antigen peptide transporter 2	Tap2	-2.21277	ENSMUSG00000024339	Tap2	-1.288	0.000795907
Tapasin	Tapbp	-2.11642	ENSMUSG00000024308	Tapbp	-1.355	1.03626e-30
Testis-expressed sequence 30 protein	Tex30	-1.42979	ENSMUSG00000026049	Tex30	-1.68	6.85247e-10
Transferrin receptor protein 1	Tfrc	-1.60395	ENSMUSG00000022797	Tfrc	-0.391	0.00159344
Protein timeless homolog	Timeless	-2.48114	ENSMUSG00000039994	Timeless	-1.368	2.07645e-26
Transmembrane protein 209	Tmem209	-1.27614	ENSMUSG00000029782	Tmem209	-1.317	7.61482e-10
Torsin-3A	Tor3a	-4.18235	ENSMUSG00000060519	Tor3a	-2.482	4.54978e-38
Protein-tyrosine sulfotransferase 2	Tpst2	-1.3429	ENSMUSG00000029344	Tpst2	-1.09	6.93567e-10
tRNA (adenine(58)-N(1))-methyltransferase catalytic subunit TRMT61A	Trmt61a	-1.32931	ENSMUSG00000060950	Trmt61a	-1.301	1.07425e-08
Transformation/transcription domain-associated protein	Trrap	-2.66134	ENSMUSG00000045482	Trrap	-0.653	0.000238849
Tetratricopeptide repeat protein 39B	Ttc39b	-1.12738	ENSMUSG00000038172	Ttc39b	-1.34	3.59727e-19
Dual specificity protein kinase TTK	Ttk	-3.77289	ENSMUSG00000038379	Ttk	-0.374	0.00138531
Thioredoxin-like protein 4A	Txnl4a	-1.02486	ENSMUSG00000057130	Txnl4a	-1.127	2.12468e-21
Ubiquitin carboxyl-terminal hydrolase isozyme L1	Uchl1	-3.87598	ENSMUSG00000029223	Uchl1	-3.098	2.77369e-39
Ubl carboxyl-terminal hydrolase 18	Usp18	-2.42719	ENSMUSG00000030107	Usp18	-2.468	7.11171e-57
Small subunit processome component 20 homolog	Utp20	-1.33786	ENSMUSG00000004356	Utp20	-0.981	3.49693e-08
U3 small nucleolar RNA-associated protein 6 homolog	Utp6	-1.18837	ENSMUSG00000035575	Utp6	-0.596	0.000317461
Vacuolar protein sorting-associated protein 13A	Vps13a	-2.62276	ENSMUSG00000046230	Vps13a	-1.763	1.12394e-25
WD repeat-containing protein 46	Wdr46	-1.89468	ENSMUSG00000024312	Wdr46	-0.961	4.37611e-07
XIAP-associated factor 1	Xaf1	-2.54859	ENSMUSG00000040483	Xaf1	-2.432	2.08117e-22
Zinc finger CCHC domain-containing protein 8	Zcchc8	-1.25508	ENSMUSG00000029427	Zcchc8	-0.648	0.0034906

## Sheet: GO_KEGG_DWDW_214
Annotation Cluster 1	Enrichment Score: 10.14745265890337
Category	Term	Count	Genes	FDR
GOTERM_BP_FAT	GO:0006396~RNA processing	40	NAF1, PUS1, CCNT1, UTP6, CMTR1, BUD31, DIMT1, DDX27, NONO, KDM1A, SBDS, CDKN2A, DHX37, ADAT2, MDN1, RBM25, NSUN5, ZCCHC8, PDCD11, GEMIN2, LGALS3, NOC4L, MPHOSPH10, AKAP8L, RRP9, TRMT61A, PWP2, IWS1, NOP14, DDX56, SRFBP1, SLU7, DDX54, UTP20, CPSF2, WDR46, PRPF38B, DDX51, ADAR, TXNL4A	2.22045e-12
GOTERM_BP_FAT	GO:0022613~ribonucleoprotein complex biogenesis	30	NAF1, SDAD1, UTP6, DIMT1, DDX27, PPAN, SBDS, CDKN2A, AATF, RSL24D1, MDN1, NSUN5, PDCD11, GEMIN2, NOC4L, MPHOSPH10, RRP9, PWP2, ATM, NOP14, DDX56, SRFBP1, SLU7, DDX31, MCTS2, UTP20, WDR46, ADAR, TXNL4A, DDX51	5.24025e-12
GOTERM_BP_FAT	GO:0042254~ribosome biogenesis	24	NAF1, SDAD1, PDCD11, NOC4L, UTP6, MPHOSPH10, RRP9, PWP2, DIMT1, DDX27, NOP14, PPAN, DDX56, SBDS, CDKN2A, SRFBP1, DDX31, AATF, RSL24D1, UTP20, MDN1, NSUN5, WDR46, DDX51	1.34626e-10
GOTERM_BP_FAT	GO:0006364~rRNA processing	19	NAF1, PDCD11, NOC4L, UTP6, MPHOSPH10, RRP9, PWP2, DIMT1, NOP14, DDX27, DDX56, SBDS, CDKN2A, SRFBP1, UTP20, MDN1, NSUN5, WDR46, DDX51	3.54373e-09
GOTERM_BP_FAT	GO:0016072~rRNA metabolic process	19	NAF1, PDCD11, NOC4L, UTP6, MPHOSPH10, RRP9, PWP2, DIMT1, NOP14, DDX27, DDX56, SBDS, CDKN2A, SRFBP1, UTP20, MDN1, NSUN5, WDR46, DDX51	6.19106e-09
GOTERM_BP_FAT	GO:0034470~ncRNA processing	23	NAF1, PDCD11, PUS1, NOC4L, UTP6, MPHOSPH10, RRP9, TRMT61A, PWP2, DIMT1, NOP14, DDX27, DDX56, SBDS, CDKN2A, SRFBP1, ADAT2, UTP20, MDN1, NSUN5, WDR46, ADAR, DDX51	1.4492e-08
GOTERM_BP_FAT	GO:0034660~ncRNA metabolic process	26	NAF1, PUS1, UTP6, DIMT1, DDX27, SBDS, CDKN2A, ADAT2, H2AFY, MDN1, NSUN5, MEPCE, PDCD11, NOC4L, MPHOSPH10, RRP9, POLR1B, TRMT61A, PWP2, NOP14, DDX56, SRFBP1, UTP20, WDR46, ADAR, DDX51	3.58977e-08
GOTERM_BP_FAT	GO:0030490~maturation of SSU-rRNA	8	NOP14, NOC4L, SRFBP1, UTP6, MPHOSPH10, UTP20, WDR46, PWP2	0.00204274
GOTERM_BP_FAT	GO:0042274~ribosomal small subunit biogenesis	8	NOP14, NOC4L, SRFBP1, UTP6, MPHOSPH10, UTP20, WDR46, PWP2	0.0338095
GOTERM_BP_FAT	GO:0000462~maturation of SSU-rRNA from tricistronic rRNA transcript (SSU-rRNA, 5.8S rRNA, LSU-rRNA)	5	NOC4L, UTP6, UTP20, WDR46, PWP2	1.08781
Annotation Cluster 2	Enrichment Score: 3.511284880533461
Category	Term	Count	Genes	FDR
GOTERM_BP_FAT	GO:0006259~DNA metabolic process	28	EZH2, TRRAP, PRIM1, NONO, KDM1A, CDKN2A, PRIM2, ORC6, HELLS, ORC2, PDS5B, MSH3, DTL, DTX3L, SMC6, ATAD5, RAD9A, ATM, MNAT1, BAZ1A, TFRC, PARP9, TIMELESS, NSMCE4A, RFC2, JUN, RRM2, CHAF1A	0.00419503
GOTERM_BP_FAT	GO:0006974~cellular response to DNA damage stimulus	20	PDS5B, MSH3, DTL, DTX3L, SMC6, ATAD5, RAD9A, TRRAP, ATM, NONO, KDM1A, MNAT1, CDKN2A, PARP9, TIMELESS, NSMCE4A, RASSF1, AATF, NDRG1, CHAF1A	0.371706
GOTERM_BP_FAT	GO:0006281~DNA repair	15	NONO, KDM1A, MNAT1, PDS5B, NSMCE4A, MSH3, TIMELESS, PARP9, DTL, DTX3L, SMC6, RAD9A, TRRAP, CHAF1A, ATM	0.590979
GOTERM_BP_FAT	GO:0033554~cellular response to stress	27	EZH2, TRRAP, NONO, KDM1A, CDKN2A, EZR, AATF, NDRG1, PDS5B, MSH3, DTL, DTX3L, NF1, SMC6, ATAD5, RAD9A, ATM, PPIF, MNAT1, PARP9, TIMELESS, NSMCE4A, JUN, RASSF1, SLU7, EIF2AK2, CHAF1A	66.3477
Annotation Cluster 3	Enrichment Score: 2.741113651138694
Category	Term	Count	Genes	FDR
GOTERM_BP_FAT	GO:0035456~response to interferon-beta	7	IFIT1, IGTP, BST2, IIGP1, XAF1, STAT1, GBP2	0.0306027
GOTERM_BP_FAT	GO:0035458~cellular response to interferon-beta	5	IFIT1, IGTP, IIGP1, STAT1, GBP2	1.98839
GOTERM_BP_FAT	GO:0034097~response to cytokine	17	GBP7, ALAD, BST2, GBP9, PRKCI, STAT1, IFIT2, IFIT1, IGTP, PARP9, ISG15, JUN, IIGP1, XAF1, EIF2AK2, GBP2, ADAR	6.61893
GOTERM_BP_FAT	GO:0071345~cellular response to cytokine stimulus	10	IFIT2, GBP7, IFIT1, ALAD, IGTP, GBP9, IIGP1, STAT1, GBP2, ADAR	95.2554
Annotation Cluster 4	Enrichment Score: 2.5863033569235636
Category	Term	Count	Genes	FDR
GOTERM_BP_FAT	GO:0045087~innate immune response	21	GBP7, IFIH1, POLR3H, BST2, LGALS3, GBP9, STAT1, B2M, DDX58, IFIT2, IFIT1, PARP9, ISG15, TAP2, OASL2, TAP1, IIGP1, EIF2AK2, GBP2, DHX58, ADAR	0.0656099
GOTERM_BP_FAT	GO:0044403~symbiosis, encompassing mutualism through parasitism	20	GBP7, IFIH1, POLR3H, BST2, GBP9, PARP10, STAT1, DDX58, IFIT2, IFIT1, ISG15, TAP2, OASL2, JUN, TAP1, SCARB1, EIF2AK2, GBP2, DHX58, ADAR	0.187476
GOTERM_BP_FAT	GO:0044419~interspecies interaction between organisms	20	GBP7, IFIH1, POLR3H, BST2, GBP9, PARP10, STAT1, DDX58, IFIT2, IFIT1, ISG15, TAP2, OASL2, JUN, TAP1, SCARB1, EIF2AK2, GBP2, DHX58, ADAR	0.187476
GOTERM_BP_FAT	GO:0048525~negative regulation of viral process	8	BST2, ISG15, JUN, PARP10, STAT1, EIF2AK2, DHX58, ADAR	0.220964
GOTERM_BP_FAT	GO:0035455~response to interferon-alpha	5	IFIT2, IFIT1, BST2, EIF2AK2, ADAR	0.243966
GOTERM_BP_FAT	GO:0043901~negative regulation of multi-organism process	9	TPST2, BST2, ISG15, JUN, PARP10, STAT1, EIF2AK2, DHX58, ADAR	0.621222
GOTERM_BP_FAT	GO:0098542~defense response to other organism	18	H2-K1, GBP7, IFIH1, POLR3H, BST2, GBP9, COTL1, B2M, DDX58, IFIT2, IFIT1, ISG15, OASL2, IIGP1, EIF2AK2, GBP2, DHX58, ADAR	1.0231
GOTERM_BP_FAT	GO:0050792~regulation of viral process	12	DDX58, IFIT1, BST2, ISG15, TAP2, JUN, TAP1, PARP10, STAT1, EIF2AK2, DHX58, ADAR	1.15309
GOTERM_BP_FAT	GO:0051707~response to other organism	24	H2-K1, GBP7, IFIH1, ALAD, POLR3H, BST2, GBP9, ADH7, STAT1, COTL1, B2M, DDX58, IFIT2, IFIT1, ISG15, TAP2, OASL2, JUN, IIGP1, SCARB1, EIF2AK2, GBP2, DHX58, ADAR	2.07899
GOTERM_BP_FAT	GO:0043207~response to external biotic stimulus	24	H2-K1, GBP7, IFIH1, ALAD, POLR3H, BST2, GBP9, ADH7, STAT1, COTL1, B2M, DDX58, IFIT2, IFIT1, ISG15, TAP2, OASL2, JUN, IIGP1, SCARB1, EIF2AK2, GBP2, DHX58, ADAR	2.1056
GOTERM_BP_FAT	GO:0045071~negative regulation of viral genome replication	5	BST2, ISG15, PARP10, EIF2AK2, ADAR	2.17672
GOTERM_BP_FAT	GO:0006955~immune response	27	IFIH1, H2-D1, B2M, ALCAM, EZR, ISG15, TAP2, OASL2, TAP1, IIGP1, DHX58, H2-K1, GBP7, POLR3H, BST2, LGALS3, GBP9, ATAD5, STAT1, DDX58, IFIT2, IFIT1, TFRC, PARP9, EIF2AK2, GBP2, ADAR	2.35441
GOTERM_BP_FAT	GO:0043903~regulation of symbiosis, encompassing mutualism through parasitism	12	DDX58, IFIT1, BST2, ISG15, TAP2, JUN, TAP1, PARP10, STAT1, EIF2AK2, DHX58, ADAR	2.43761
GOTERM_BP_FAT	GO:1903901~negative regulation of viral life cycle	6	BST2, ISG15, JUN, PARP10, EIF2AK2, ADAR	3.40502
GOTERM_BP_FAT	GO:0002252~immune effector process	19	H2-K1, IFIH1, POLR3H, BST2, LGALS3, H2-D1, ATAD5, B2M, DDX58, IFIT2, IFIT1, ISG15, TFRC, TAP2, OASL2, TAP1, EIF2AK2, DHX58, ADAR	3.6657
GOTERM_BP_FAT	GO:0051607~defense response to virus	11	DDX58, IFIT2, IFIT1, IFIH1, POLR3H, BST2, ISG15, OASL2, EIF2AK2, DHX58, ADAR	3.75983
GOTERM_BP_FAT	GO:0009607~response to biotic stimulus	24	H2-K1, GBP7, IFIH1, ALAD, POLR3H, BST2, GBP9, ADH7, STAT1, COTL1, B2M, DDX58, IFIT2, IFIT1, ISG15, TAP2, OASL2, JUN, IIGP1, SCARB1, EIF2AK2, GBP2, DHX58, ADAR	4.13575
GOTERM_BP_FAT	GO:0016032~viral process	16	IFIH1, POLR3H, BST2, PARP10, STAT1, DDX58, IFIT2, IFIT1, ISG15, TAP2, OASL2, JUN, TAP1, EIF2AK2, DHX58, ADAR	4.61397
GOTERM_BP_FAT	GO:0044764~multi-organism cellular process	16	IFIH1, POLR3H, BST2, PARP10, STAT1, DDX58, IFIT2, IFIT1, ISG15, TAP2, OASL2, JUN, TAP1, EIF2AK2, DHX58, ADAR	4.9878
GOTERM_BP_FAT	GO:0034097~response to cytokine	17	GBP7, ALAD, BST2, GBP9, PRKCI, STAT1, IFIT2, IFIT1, IGTP, PARP9, ISG15, JUN, IIGP1, XAF1, EIF2AK2, GBP2, ADAR	6.61893
GOTERM_BP_FAT	GO:0043900~regulation of multi-organism process	13	TPST2, BST2, PARP10, STAT1, DDX58, IFIT1, ISG15, JUN, TAP2, TAP1, EIF2AK2, DHX58, ADAR	7.33297
GOTERM_BP_FAT	GO:0009615~response to virus	11	DDX58, IFIT2, IFIT1, IFIH1, POLR3H, BST2, ISG15, OASL2, EIF2AK2, DHX58, ADAR	13.49
GOTERM_BP_FAT	GO:0045069~regulation of viral genome replication	5	BST2, ISG15, PARP10, EIF2AK2, ADAR	17.2197
GOTERM_BP_FAT	GO:0019058~viral life cycle	8	BST2, ISG15, TAP2, JUN, TAP1, PARP10, EIF2AK2, ADAR	22.1297
GOTERM_BP_FAT	GO:0019079~viral genome replication	5	BST2, ISG15, PARP10, EIF2AK2, ADAR	25.0183
GOTERM_BP_FAT	GO:1903900~regulation of viral life cycle	6	BST2, ISG15, JUN, PARP10, EIF2AK2, ADAR	35.7518
GOTERM_BP_FAT	GO:0006952~defense response	26	IFIH1, H2-D1, B2M, TAPBP, IGTP, ISG15, OASL2, TAP2, TAP1, IIGP1, DHX58, H2-K1, GBP7, POLR3H, BST2, LGALS3, GBP9, COTL1, STAT1, DDX58, IFIT2, IFIT1, PARP9, EIF2AK2, GBP2, ADAR	36.5501
GOTERM_BP_FAT	GO:0009617~response to bacterium	14	H2-K1, GBP7, ALAD, GBP9, ADH7, STAT1, B2M, ISG15, JUN, TAP2, IIGP1, SCARB1, EIF2AK2, GBP2	51.2471
GOTERM_BP_FAT	GO:0001817~regulation of cytokine production	11	DDX58, SUZ12, F11R, IFIH1, EZR, BST2, ISG15, EIF2AK2, DHX58, B2M, AGPAT1	85.6178
GOTERM_BP_FAT	GO:0001816~cytokine production	11	DDX58, SUZ12, IRF9, IFIH1, EZR, BST2, ISG15, EIF2AK2, DHX58, B2M, AGPAT1	95.0444
GOTERM_BP_FAT	GO:0009605~response to external stimulus	31	NRP2, IFIH1, ALAD, ADH7, B2M, ALCAM, PPAN, SBDS, ISG15, TAP2, OASL2, IIGP1, SCARB1, DHX58, H2-K1, GBP7, POLR3H, LGALS3, BST2, GBP9, COTL1, STAT1, EIF2B1, DDX58, IFIT2, IFIT1, TFRC, JUN, EIF2AK2, GBP2, ADAR	98.5038
Annotation Cluster 5	Enrichment Score: 2.3223720642624315
Category	Term	Count	Genes	FDR
GOTERM_BP_FAT	GO:0006397~mRNA processing	17	PDCD11, GEMIN2, LGALS3, CCNT1, AKAP8L, CMTR1, BUD31, IWS1, NONO, KDM1A, SLU7, CPSF2, RBM25, PRPF38B, TXNL4A, ADAR, ZCCHC8	0.0399047
GOTERM_BP_FAT	GO:0016071~mRNA metabolic process	18	PDCD11, GEMIN2, LGALS3, CCNT1, AKAP8L, CMTR1, BUD31, IWS1, ATM, NONO, KDM1A, SLU7, CPSF2, RBM25, PRPF38B, TXNL4A, ZCCHC8, ADAR	0.169882
GOTERM_BP_FAT	GO:0008380~RNA splicing	11	NONO, KDM1A, GEMIN2, LGALS3, SLU7, BUD31, IWS1, RBM25, PRPF38B, TXNL4A, ZCCHC8	9.03059
GOTERM_BP_FAT	GO:0000377~RNA splicing, via transesterification reactions with bulged adenosine as nucleophile	7	NONO, KDM1A, GEMIN2, SLU7, BUD31, RBM25, TXNL4A	51.7643
GOTERM_BP_FAT	GO:0000398~mRNA splicing, via spliceosome	7	NONO, KDM1A, GEMIN2, SLU7, BUD31, RBM25, TXNL4A	51.7643
GOTERM_BP_FAT	GO:0000375~RNA splicing, via transesterification reactions	7	NONO, KDM1A, GEMIN2, SLU7, BUD31, RBM25, TXNL4A	52.4406
GOTERM_BP_FAT	GO:0000245~spliceosomal complex assembly	3	GEMIN2, SLU7, TXNL4A	79.3291
Annotation Cluster 6	Enrichment Score: 2.1786049022992033
Category	Term	Count	Genes	FDR
GOTERM_BP_FAT	GO:0019885~antigen processing and presentation of endogenous peptide antigen via MHC class I	6	H2-K1, TAP2, TAP1, H2-D1, B2M, TAPBP	0.000358736
GOTERM_BP_FAT	GO:0002483~antigen processing and presentation of endogenous peptide antigen	6	H2-K1, TAP2, TAP1, H2-D1, B2M, TAPBP	0.00118474
GOTERM_BP_FAT	GO:0019883~antigen processing and presentation of endogenous antigen	6	H2-K1, TAP2, TAP1, H2-D1, B2M, TAPBP	0.00228201
GOTERM_BP_FAT	GO:0002478~antigen processing and presentation of exogenous peptide antigen	7	H2-K1, TAP2, TAP1, H2-D1, PSMB8, B2M, TAPBP	0.0600036
GOTERM_BP_FAT	GO:0019884~antigen processing and presentation of exogenous antigen	7	H2-K1, TAP2, TAP1, H2-D1, PSMB8, B2M, TAPBP	0.119227
GOTERM_BP_FAT	GO:0002484~antigen processing and presentation of endogenous peptide antigen via MHC class I via ER pathway	4	H2-K1, TAP2, TAP1, H2-D1	0.198841
GOTERM_BP_FAT	GO:0002485~antigen processing and presentation of endogenous peptide antigen via MHC class I via ER pathway, TAP-dependent	4	H2-K1, TAP2, TAP1, H2-D1	0.198841
GOTERM_BP_FAT	GO:0002474~antigen processing and presentation of peptide antigen via MHC class I	7	H2-K1, TAP2, TAP1, H2-D1, PSMB8, B2M, TAPBP	0.276067
GOTERM_BP_FAT	GO:0002479~antigen processing and presentation of exogenous peptide antigen via MHC class I, TAP-dependent	5	H2-K1, H2-D1, PSMB8, B2M, TAPBP	0.596098
GOTERM_BP_FAT	GO:0048002~antigen processing and presentation of peptide antigen	7	H2-K1, TAP2, TAP1, H2-D1, PSMB8, B2M, TAPBP	0.929051
GOTERM_BP_FAT	GO:0042590~antigen processing and presentation of exogenous peptide antigen via MHC class I	5	H2-K1, H2-D1, PSMB8, B2M, TAPBP	1.08781
GOTERM_BP_FAT	GO:0001916~positive regulation of T cell mediated cytotoxicity	4	H2-K1, TAP2, H2-D1, B2M	2.81657
GOTERM_BP_FAT	GO:0002252~immune effector process	19	H2-K1, IFIH1, POLR3H, BST2, LGALS3, H2-D1, ATAD5, B2M, DDX58, IFIT2, IFIT1, ISG15, TFRC, TAP2, OASL2, TAP1, EIF2AK2, DHX58, ADAR	3.6657
GOTERM_BP_FAT	GO:0001914~regulation of T cell mediated cytotoxicity	4	H2-K1, TAP2, H2-D1, B2M	5.8112
GOTERM_BP_FAT	GO:0002708~positive regulation of lymphocyte mediated immunity	6	H2-K1, TFRC, TAP2, H2-D1, ATAD5, B2M	7.1203
GOTERM_BP_FAT	GO:0002477~antigen processing and presentation of exogenous peptide antigen via MHC class Ib	3	TAP2, TAP1, B2M	7.4259
GOTERM_BP_FAT	GO:0002481~antigen processing and presentation of exogenous protein antigen via MHC class Ib, TAP-dependent	3	TAP2, TAP1, B2M	7.4259
GOTERM_BP_FAT	GO:0002824~positive regulation of adaptive immune response based on somatic recombination of immune receptors built from immunoglobulin superfamily domains	6	H2-K1, TFRC, TAP2, H2-D1, ATAD5, B2M	8.09895
GOTERM_BP_FAT	GO:0002703~regulation of leukocyte mediated immunity	8	H2-K1, BST2, TFRC, TAP2, TAP1, H2-D1, ATAD5, B2M	8.7101
GOTERM_BP_FAT	GO:0002706~regulation of lymphocyte mediated immunity	7	H2-K1, TFRC, TAP2, TAP1, H2-D1, ATAD5, B2M	9.10818
GOTERM_BP_FAT	GO:0002821~positive regulation of adaptive immune response	6	H2-K1, TFRC, TAP2, H2-D1, ATAD5, B2M	10.3114
GOTERM_BP_FAT	GO:0001910~regulation of leukocyte mediated cytotoxicity	5	H2-K1, TAP2, TAP1, H2-D1, B2M	10.3604
GOTERM_BP_FAT	GO:0002428~antigen processing and presentation of peptide antigen via MHC class Ib	3	TAP2, TAP1, B2M	10.9783
GOTERM_BP_FAT	GO:0019882~antigen processing and presentation	7	H2-K1, TAP2, TAP1, H2-D1, PSMB8, B2M, TAPBP	11.0736
GOTERM_BP_FAT	GO:0002697~regulation of immune effector process	12	DDX58, H2-K1, IFIT1, LGALS3, BST2, TFRC, TAP2, TAP1, H2-D1, ATAD5, DHX58, B2M	13.3482
GOTERM_BP_FAT	GO:0002711~positive regulation of T cell mediated immunity	4	H2-K1, TAP2, H2-D1, B2M	14.6386
GOTERM_BP_FAT	GO:0002705~positive regulation of leukocyte mediated immunity	6	H2-K1, TFRC, TAP2, H2-D1, ATAD5, B2M	14.7751
GOTERM_BP_FAT	GO:0001913~T cell mediated cytotoxicity	4	H2-K1, TAP2, H2-D1, B2M	15.6448
GOTERM_BP_FAT	GO:0031341~regulation of cell killing	5	H2-K1, TAP2, TAP1, H2-D1, B2M	16.5176
GOTERM_BP_FAT	GO:0050776~regulation of immune response	15	DDX58, H2-K1, IFIH1, EZR, BST2, TFRC, LGALS3, PARP9, TAP2, TAP1, H2-D1, ATAD5, DHX58, B2M, ADAR	16.6366
GOTERM_BP_FAT	GO:0002475~antigen processing and presentation via MHC class Ib	3	TAP2, TAP1, B2M	19.4416
GOTERM_BP_FAT	GO:0001912~positive regulation of leukocyte mediated cytotoxicity	4	H2-K1, TAP2, H2-D1, B2M	23.4871
GOTERM_BP_FAT	GO:0002699~positive regulation of immune effector process	7	H2-K1, TFRC, TAP2, H2-D1, ATAD5, DHX58, B2M	27.4952
GOTERM_BP_FAT	GO:0031343~positive regulation of cell killing	4	H2-K1, TAP2, H2-D1, B2M	32.4127
GOTERM_BP_FAT	GO:0001909~leukocyte mediated cytotoxicity	5	H2-K1, TAP2, TAP1, H2-D1, B2M	34.9112
GOTERM_BP_FAT	GO:0002822~regulation of adaptive immune response based on somatic recombination of immune receptors built from immunoglobulin superfamily domains	6	H2-K1, TFRC, TAP2, H2-D1, ATAD5, B2M	35.0077
GOTERM_BP_FAT	GO:0002709~regulation of T cell mediated immunity	4	H2-K1, TAP2, H2-D1, B2M	43.2811
GOTERM_BP_FAT	GO:0002819~regulation of adaptive immune response	6	H2-K1, TFRC, TAP2, H2-D1, ATAD5, B2M	44.4651
GOTERM_BP_FAT	GO:0001906~cell killing	5	H2-K1, TAP2, TAP1, H2-D1, B2M	50.4427
GOTERM_BP_FAT	GO:0050778~positive regulation of immune response	11	DDX58, H2-K1, IFIH1, EZR, LGALS3, TFRC, TAP2, H2-D1, ATAD5, DHX58, B2M	52.9098
GOTERM_BP_FAT	GO:0002684~positive regulation of immune system process	15	H2-K1, IFIH1, LGALS3, H2-D1, ATAD5, B2M, DDX58, KDM1A, EZR, ISG15, TFRC, TAP2, JUN, TAP1, DHX58	64.8118
GOTERM_BP_FAT	GO:0002449~lymphocyte mediated immunity	7	H2-K1, TFRC, TAP2, TAP1, H2-D1, ATAD5, B2M	74.3048
GOTERM_BP_FAT	GO:0002443~leukocyte mediated immunity	8	H2-K1, BST2, TFRC, TAP2, TAP1, H2-D1, ATAD5, B2M	78.1458
GOTERM_BP_FAT	GO:0002456~T cell mediated immunity	4	H2-K1, TAP2, H2-D1, B2M	79.6123
GOTERM_BP_FAT	GO:0002700~regulation of production of molecular mediator of immune response	4	BST2, TFRC, ATAD5, B2M	93.9182
GOTERM_BP_FAT	GO:0031345~negative regulation of cell projection organization	5	H2-K1, H2-D1, ITGA3, IFRD1, B2M	94.3726
GOTERM_BP_FAT	GO:0002250~adaptive immune response	8	H2-K1, ALCAM, TFRC, TAP2, TAP1, H2-D1, ATAD5, B2M	94.8321
GOTERM_BP_FAT	GO:0002460~adaptive immune response based on somatic recombination of immune receptors built from immunoglobulin superfamily domains	6	H2-K1, TFRC, TAP2, H2-D1, ATAD5, B2M	97.8435
GOTERM_BP_FAT	GO:0002702~positive regulation of production of molecular mediator of immune response	3	TFRC, ATAD5, B2M	98.0996
GOTERM_BP_FAT	GO:0010721~negative regulation of cell development	7	H2-K1, KDM1A, NF1, H2-D1, STAT1, IFRD1, B2M	98.8259
GOTERM_BP_FAT	GO:0050768~negative regulation of neurogenesis	6	H2-K1, KDM1A, NF1, H2-D1, IFRD1, B2M	99.3243
GOTERM_BP_FAT	GO:0010977~negative regulation of neuron projection development	4	H2-K1, H2-D1, IFRD1, B2M	99.3821
GOTERM_BP_FAT	GO:0051961~negative regulation of nervous system development	6	H2-K1, KDM1A, NF1, H2-D1, IFRD1, B2M	99.784
GOTERM_BP_FAT	GO:0045665~negative regulation of neuron differentiation	4	H2-K1, H2-D1, IFRD1, B2M	99.9991
GOTERM_BP_FAT	GO:0048878~chemical homeostasis	7	CDKN2A, TFRC, TAP2, TAP1, SCARB1, STAT1, B2M	100
Annotation Cluster 7	Enrichment Score: 1.9255508544567854
Category	Term	Count	Genes	FDR
GOTERM_BP_FAT	GO:0044085~cellular component biogenesis	54	NAF1, HAUS6, SDAD1, ALAD, UTP6, HAUS1, H1FX, CDH2, RNF213, TAPBP, DIMT1, DDX27, PPAN, GPHN, SBDS, CDKN2A, EZR, TAP2, H2AFY, AATF, MLKL, XAF1, RSL24D1, MDN1, DCTPP1, NSUN5, HELLS, PDCD11, GEMIN2, NOC4L, MPHOSPH10, MPP7, POLR1B, PARP10, RRP9, PWP2, ATM, FARP2, NOP14, DDX56, SRFBP1, JUN, RRM2, DDX31, SLU7, UTP20, MCTS2, EIF2AK2, CHAF1A, WDR46, SPTAN1, TXNL4A, ADAR, DDX51	0.020798
GOTERM_BP_FAT	GO:0043933~macromolecular complex subunit organization	47	ALAD, EZH2, H1FX, CDH2, TRRAP, RNF213, TAPBP, KDM1A, PPAN, GPHN, SBDS, CDKN2A, ELOF1, TAP2, H2AFY, MLKL, SCARB1, RSL24D1, XAF1, MDN1, DCTPP1, HELLS, NES, GEMIN2, DTX3L, NF1, AKAP8L, MPP7, ARID1A, PARP10, POLR1B, ATM, PWP2, IWS1, FARP2, SUZ12, BAZ1A, RRM2, JUN, SLU7, MCTS2, EIF2AK2, CHAF1A, EP400, SPTAN1, ADAR, TXNL4A	0.0417234
GOTERM_BP_FAT	GO:0065003~macromolecular complex assembly	31	ALAD, H1FX, CDH2, RNF213, TAPBP, PPAN, SBDS, GPHN, CDKN2A, TAP2, H2AFY, MLKL, XAF1, RSL24D1, MDN1, DCTPP1, HELLS, GEMIN2, MPP7, PWP2, ATM, FARP2, JUN, RRM2, SLU7, EIF2AK2, MCTS2, CHAF1A, SPTAN1, TXNL4A, ADAR	3.54851
GOTERM_BP_FAT	GO:0022607~cellular component assembly	34	ALAD, HAUS6, HAUS1, H1FX, CDH2, RNF213, TAPBP, PPAN, GPHN, SBDS, CDKN2A, EZR, TAP2, H2AFY, MLKL, XAF1, RSL24D1, MDN1, DCTPP1, HELLS, GEMIN2, MPP7, PWP2, ATM, FARP2, RRM2, JUN, SLU7, EIF2AK2, MCTS2, CHAF1A, SPTAN1, ADAR, TXNL4A	91.5861
GOTERM_BP_FAT	GO:0071822~protein complex subunit organization	21	ALAD, NES, NF1, MPP7, H1FX, ARID1A, CDH2, RNF213, TAPBP, FARP2, GPHN, TAP2, JUN, RRM2, H2AFY, MLKL, XAF1, EIF2AK2, CHAF1A, DCTPP1, SPTAN1	96.0516
GOTERM_BP_FAT	GO:0006461~protein complex assembly	18	ALAD, MPP7, H1FX, CDH2, RNF213, TAPBP, FARP2, GPHN, TAP2, JUN, RRM2, H2AFY, MLKL, XAF1, CHAF1A, EIF2AK2, DCTPP1, SPTAN1	99.5781
GOTERM_BP_FAT	GO:0070271~protein complex biogenesis	18	ALAD, MPP7, H1FX, CDH2, RNF213, TAPBP, FARP2, GPHN, TAP2, JUN, RRM2, H2AFY, MLKL, XAF1, CHAF1A, EIF2AK2, DCTPP1, SPTAN1	99.5886
GOTERM_BP_FAT	GO:0051259~protein oligomerization	7	ALAD, GPHN, RRM2, MLKL, CDH2, RNF213, DCTPP1	99.9999
Annotation Cluster 8	Enrichment Score: 1.8192879780510645
Category	Term	Count	Genes	FDR
GOTERM_BP_FAT	GO:0022402~cell cycle process	28	HAUS6, HAUS1, EZH2, TTK, TRRAP, SBDS, CDCA8, CDKN2A, EZR, NCAPG2, H2AFY, NDRG1, MEPCE, HELLS, NES, PDS5B, MSH3, DSN1, DTL, AKAP8L, RAD9A, ATAD5, NCAPD3, ATM, MNAT1, TIMELESS, RASSF1, TXNL4A	0.201265
GOTERM_BP_FAT	GO:1903047~mitotic cell cycle process	21	NES, PDS5B, DSN1, HAUS1, EZH2, AKAP8L, TTK, RAD9A, TRRAP, NCAPD3, ATM, MNAT1, CDCA8, SBDS, CDKN2A, TIMELESS, NCAPG2, H2AFY, HELLS, MEPCE, TXNL4A	0.218701
GOTERM_BP_FAT	GO:0000278~mitotic cell cycle	22	NES, PDS5B, DSN1, HAUS1, EZH2, AKAP8L, TTK, ATAD5, RAD9A, TRRAP, NCAPD3, ATM, MNAT1, CDCA8, SBDS, CDKN2A, TIMELESS, NCAPG2, H2AFY, HELLS, MEPCE, TXNL4A	0.363476
GOTERM_BP_FAT	GO:0007049~cell cycle	32	HAUS6, HAUS1, CCNT1, EZH2, TTK, TRRAP, SBDS, CDCA8, CDKN2A, EZR, NCAPG2, H2AFY, AATF, NDRG1, MEPCE, HELLS, NES, PDS5B, MSH3, DSN1, CCNH, DTL, AKAP8L, RAD9A, ATAD5, NCAPD3, ATM, MNAT1, TIMELESS, RASSF1, CHAF1A, TXNL4A	0.553061
GOTERM_BP_FAT	GO:0000819~sister chromatid segregation	8	CDCA8, PDS5B, DSN1, AKAP8L, TTK, H2AFY, ATM, NCAPD3	4.29346
GOTERM_BP_FAT	GO:0000070~mitotic sister chromatid segregation	7	CDCA8, PDS5B, DSN1, AKAP8L, H2AFY, ATM, NCAPD3	7.19742
GOTERM_BP_FAT	GO:0007067~mitotic nuclear division	12	CDCA8, PDS5B, TIMELESS, NCAPG2, DSN1, HAUS1, AKAP8L, H2AFY, ATM, NCAPD3, HELLS, TXNL4A	12.8132
GOTERM_BP_FAT	GO:0000280~nuclear division	14	PDS5B, MSH3, DSN1, HAUS1, AKAP8L, TTK, NCAPD3, ATM, CDCA8, TIMELESS, NCAPG2, H2AFY, HELLS, TXNL4A	20.9517
GOTERM_BP_FAT	GO:0098813~nuclear chromosome segregation	8	CDCA8, PDS5B, DSN1, AKAP8L, TTK, H2AFY, ATM, NCAPD3	26.7091
GOTERM_BP_FAT	GO:0007059~chromosome segregation	9	CDCA8, PDS5B, DSN1, AKAP8L, SMC6, TTK, H2AFY, ATM, NCAPD3	30.088
GOTERM_BP_FAT	GO:0048285~organelle fission	14	PDS5B, MSH3, DSN1, HAUS1, AKAP8L, TTK, NCAPD3, ATM, CDCA8, TIMELESS, NCAPG2, H2AFY, HELLS, TXNL4A	32.184
GOTERM_BP_FAT	GO:0051301~cell division	12	CDCA8, PDS5B, CDKN2A, TIMELESS, NCAPG2, DSN1, CCNT1, HAUS1, AATF, NCAPD3, HELLS, TXNL4A	58.3088
GOTERM_BP_FAT	GO:1903046~meiotic cell cycle process	5	MSH3, DSN1, TTK, ATM, NCAPD3	97.0609
GOTERM_BP_FAT	GO:0070192~chromosome organization involved in meiotic cell cycle	3	DSN1, ATM, NCAPD3	97.2743
GOTERM_BP_FAT	GO:0051304~chromosome separation	3	TTK, ATM, NCAPD3	98.2665
GOTERM_BP_FAT	GO:0045132~meiotic chromosome segregation	3	DSN1, TTK, ATM	99.5967
GOTERM_BP_FAT	GO:0051321~meiotic cell cycle	5	MSH3, DSN1, TTK, ATM, NCAPD3	99.7775
GOTERM_BP_FAT	GO:0007126~meiotic nuclear division	4	MSH3, DSN1, TTK, ATM	99.9477
GOTERM_BP_FAT	GO:1902589~single-organism organelle organization	19	F11R, SDAD1, NES, HAUS6, PDS5B, DSN1, HAUS1, NF1, AKAP8L, PRKCI, TTK, NCAPD3, ATM, FARP2, PPIF, CDCA8, EZR, H2AFY, SPTAN1	100
Annotation Cluster 9	Enrichment Score: 1.7582967427696616
Category	Term	Count	Genes	FDR
GOTERM_BP_FAT	GO:0002703~regulation of leukocyte mediated immunity	8	H2-K1, BST2, TFRC, TAP2, TAP1, H2-D1, ATAD5, B2M	8.7101
GOTERM_BP_FAT	GO:0075733~intracellular transport of virus	3	BST2, TAP2, TAP1	12.9435
GOTERM_BP_FAT	GO:1902583~multi-organism intracellular transport	3	BST2, TAP2, TAP1	17.1879
GOTERM_BP_FAT	GO:1902581~multi-organism cellular localization	3	BST2, TAP2, TAP1	17.1879
GOTERM_BP_FAT	GO:0046794~transport of virus	3	BST2, TAP2, TAP1	19.4416
GOTERM_BP_FAT	GO:0019058~viral life cycle	8	BST2, ISG15, TAP2, JUN, TAP1, PARP10, EIF2AK2, ADAR	22.1297
GOTERM_BP_FAT	GO:0050777~negative regulation of immune response	6	LGALS3, BST2, TAP2, TAP1, DHX58, ADAR	23.25
GOTERM_BP_FAT	GO:0044766~multi-organism transport	3	BST2, TAP2, TAP1	26.5801
GOTERM_BP_FAT	GO:1902579~multi-organism localization	3	BST2, TAP2, TAP1	26.5801
GOTERM_BP_FAT	GO:0002698~negative regulation of immune effector process	5	LGALS3, BST2, TAP2, TAP1, DHX58	46.5347
GOTERM_BP_FAT	GO:0002443~leukocyte mediated immunity	8	H2-K1, BST2, TFRC, TAP2, TAP1, H2-D1, ATAD5, B2M	78.1458
GOTERM_BP_FAT	GO:0002704~negative regulation of leukocyte mediated immunity	3	BST2, TAP2, TAP1	87.2783
Annotation Cluster 10	Enrichment Score: 1.7102611370659113
Category	Term	Count	Genes	FDR
GOTERM_BP_FAT	GO:0034340~response to type I interferon	4	IFIT1, ISG15, STAT1, ADAR	5.8112
GOTERM_BP_FAT	GO:0071357~cellular response to type I interferon	3	IFIT1, STAT1, ADAR	34.0411
GOTERM_BP_FAT	GO:0043331~response to dsRNA	4	DDX58, IFIT1, STAT1, ADAR	84.9768
Annotation Cluster 11	Enrichment Score: 1.6674019486168696
Category	Term	Count	Genes	FDR
GOTERM_BP_FAT	GO:0044406~adhesion of symbiont to host	4	GBP7, GBP9, SCARB1, GBP2	1.02105
GOTERM_BP_FAT	GO:0042832~defense response to protozoan	4	GBP7, GBP9, IIGP1, GBP2	7.793
GOTERM_BP_FAT	GO:0001562~response to protozoan	4	GBP7, GBP9, IIGP1, GBP2	10.9394
GOTERM_BP_FAT	GO:0034341~response to interferon-gamma	5	GBP7, BST2, GBP9, STAT1, GBP2	43.597
GOTERM_BP_FAT	GO:0071346~cellular response to interferon-gamma	4	GBP7, GBP9, STAT1, GBP2	65.3803
GOTERM_BP_FAT	GO:0050830~defense response to Gram-positive bacterium	4	GBP7, GBP9, GBP2, B2M	80.4506
GOTERM_BP_FAT	GO:0042742~defense response to bacterium	7	H2-K1, GBP7, ISG15, GBP9, IIGP1, GBP2, B2M	90.5485
GOTERM_BP_FAT	GO:0071345~cellular response to cytokine stimulus	10	IFIT2, GBP7, IFIT1, ALAD, IGTP, GBP9, IIGP1, STAT1, GBP2, ADAR	95.2554
Annotation Cluster 12	Enrichment Score: 1.6351594564313616
Category	Term	Count	Genes	FDR
GOTERM_BP_FAT	GO:0016070~RNA metabolic process	88	NAMPT, NAF1, ELF2, HELZ2, EZH2, CCNT1, PDLIM1, CMTR1, BUD31, NONO, ESF1, DDX27, PRIM1, KDM1A, SBDS, CDKN2A, GTF2A1, ELOF1, DHX37, DDX24, PRIM2, H2AFY, DDX10, IFRD1, MDN1, ZCCHC8, CCNH, PRKCI, MED12, ARID1A, POLR1B, PARP10, RRP9, TRMT61A, SUZ12, MED19, BAZ1A, TIMELESS, JUN, PARP14, DDX31, SLU7, DNTTIP2, EIF2AK2, MCTS2, CPSF2, PRPF38B, WDR46, SBNO1, PUS1, UTP6, TRRAP, PUS7, DIMT1, EZR, ADAT2, CEBPZ…	2.42924e-06
GOTERM_BP_FAT	GO:0010467~gene expression	88	NAMPT, NAF1, ELF2, ATP6AP2, HELZ2, LGMN, EZH2, CCNT1, PDLIM1, CMTR1, BUD31, NONO, ESF1, DDX27, PRIM1, KDM1A, SBDS, CDKN2A, GTF2A1, ELOF1, DHX37, PRIM2, H2AFY, IFRD1, MDN1, ZCCHC8, CCNH, MED12, PRKCI, ARID1A, POLR1B, PARP10, RRP9, TRMT61A, SUZ12, MED19, BAZ1A, TIMELESS, JUN, PARP14, SLU7, DNTTIP2, EIF2AK2, MCTS2, CPSF2, PRPF38B, WDR46, SBNO1, PUS1, UTP6, TRRAP, DIMT1, ECE1, EZR, ADAT2, CEBPZ, AATF…	0.0187484
GOTERM_BP_FAT	GO:0018130~heterocycle biosynthetic process	63	NAMPT, ALAD, ELF2, HELZ2, EZH2, CCNT1, PDLIM1, BUD31, PRIM1, ESF1, NONO, KDM1A, CDKN2A, GTF2A1, ELOF1, OASL2, PRIM2, H2AFY, IFRD1, CCNH, DTL, MED12, PRKCI, ARID1A, PARP10, POLR1B, MED19, SUZ12, BAZ1A, TIMELESS, RFC2, PARP14, RRM2, JUN, DNTTIP2, EIF2AK2, MCTS2, PRPS2, SBNO1, PUS1, TRRAP, GPHN, ECE1, EZR, CEBPZ, AATF, HELLS, MEPCE, POLR3H, NF1, AKAP8L, ITGA3, STAT1, ATM, IWS1, DDX58, IRF9, MED31, M…	5.07076
GOTERM_BP_FAT	GO:0006351~transcription, DNA-templated	51	NAMPT, ELF2, HELZ2, CCNT1, EZH2, BUD31, NONO, ESF1, PRIM1, KDM1A, CDKN2A, GTF2A1, ELOF1, PRIM2, H2AFY, IFRD1, CCNH, PRKCI, MED12, ARID1A, POLR1B, PARP10, SUZ12, MED19, BAZ1A, TIMELESS, JUN, PARP14, DNTTIP2, EIF2AK2, MCTS2, PUS1, TRRAP, EZR, CEBPZ, AATF, MEPCE, HELLS, POLR3H, AKAP8L, ITGA3, STAT1, IWS1, MED31, IRF9, DDX58, MNAT1, SRFBP1, IRF2BPL, DDX54, ADAR	7.67556
GOTERM_BP_FAT	GO:0019438~aromatic compound biosynthetic process	62	NAMPT, ALAD, ELF2, HELZ2, EZH2, CCNT1, PDLIM1, BUD31, PRIM1, ESF1, NONO, KDM1A, CDKN2A, GTF2A1, ELOF1, OASL2, PRIM2, H2AFY, IFRD1, CCNH, DTL, MED12, PRKCI, ARID1A, PARP10, POLR1B, MED19, SUZ12, BAZ1A, TIMELESS, RFC2, PARP14, RRM2, JUN, DNTTIP2, EIF2AK2, MCTS2, PRPS2, SBNO1, PUS1, TRRAP, ECE1, EZR, CEBPZ, AATF, HELLS, MEPCE, POLR3H, NF1, AKAP8L, ITGA3, STAT1, ATM, IWS1, DDX58, IRF9, MED31, MNAT1, …	8.7826
GOTERM_BP_FAT	GO:0034654~nucleobase-containing compound biosynthetic process	61	NAMPT, ELF2, HELZ2, EZH2, CCNT1, PDLIM1, BUD31, PRIM1, ESF1, NONO, KDM1A, CDKN2A, GTF2A1, ELOF1, OASL2, PRIM2, H2AFY, IFRD1, CCNH, DTL, MED12, PRKCI, ARID1A, PARP10, POLR1B, MED19, SUZ12, BAZ1A, TIMELESS, RFC2, PARP14, RRM2, JUN, DNTTIP2, EIF2AK2, MCTS2, PRPS2, SBNO1, PUS1, TRRAP, ECE1, EZR, CEBPZ, AATF, HELLS, MEPCE, POLR3H, NF1, AKAP8L, ITGA3, STAT1, ATM, IWS1, DDX58, IRF9, MED31, MNAT1, SRFBP1…	9.1538
GOTERM_BP_FAT	GO:0019219~regulation of nucleobase-containing compound metabolic process	59	NAMPT, ELF2, HELZ2, EZH2, CCNT1, PDLIM1, BUD31, ESF1, NONO, KDM1A, CDKN2A, GTF2A1, ELOF1, H2AFY, IFRD1, CCNH, MED12, PRKCI, ARID1A, PARP10, POLR1B, MED19, SUZ12, BAZ1A, TIMELESS, RFC2, PARP14, JUN, DNTTIP2, EIF2AK2, MCTS2, SBNO1, PUS1, TRRAP, ECE1, EZR, CEBPZ, AATF, RBM25, HELLS, MEPCE, MSH3, NF1, AKAP8L, ITGA3, ATAD5, STAT1, ATM, IWS1, MED31, DDX58, PPIF, IRF9, MNAT1, TFRC, SRFBP1, IRF2BPL, DDX5…	18.1524
GOTERM_BP_FAT	GO:0097659~nucleic acid-templated transcription	53	NAMPT, ELF2, HELZ2, CCNT1, EZH2, PDLIM1, BUD31, PRIM1, ESF1, NONO, KDM1A, CDKN2A, GTF2A1, ELOF1, PRIM2, H2AFY, IFRD1, CCNH, MED12, PRKCI, ARID1A, PARP10, POLR1B, MED19, SUZ12, BAZ1A, TIMELESS, PARP14, JUN, DNTTIP2, MCTS2, EIF2AK2, SBNO1, PUS1, TRRAP, EZR, CEBPZ, AATF, HELLS, MEPCE, POLR3H, AKAP8L, ITGA3, STAT1, IWS1, MED31, DDX58, IRF9, MNAT1, SRFBP1, IRF2BPL, DDX54, ADAR	29.8838
GOTERM_BP_FAT	GO:0032774~RNA biosynthetic process	53	NAMPT, ELF2, HELZ2, CCNT1, EZH2, PDLIM1, BUD31, PRIM1, ESF1, NONO, KDM1A, CDKN2A, GTF2A1, ELOF1, PRIM2, H2AFY, IFRD1, CCNH, MED12, PRKCI, ARID1A, PARP10, POLR1B, MED19, SUZ12, BAZ1A, TIMELESS, PARP14, JUN, DNTTIP2, MCTS2, EIF2AK2, SBNO1, PUS1, TRRAP, EZR, CEBPZ, AATF, HELLS, MEPCE, POLR3H, AKAP8L, ITGA3, STAT1, IWS1, MED31, DDX58, IRF9, MNAT1, SRFBP1, IRF2BPL, DDX54, ADAR	32.0745
GOTERM_BP_FAT	GO:0051171~regulation of nitrogen compound metabolic process	61	NAMPT, ELF2, HELZ2, EZH2, CCNT1, PDLIM1, BUD31, ESF1, NONO, KDM1A, CDKN2A, GTF2A1, ELOF1, H2AFY, IFRD1, CCNH, MED12, PRKCI, ARID1A, PARP10, POLR1B, MED19, SUZ12, BAZ1A, TIMELESS, RFC2, PARP14, JUN, DNTTIP2, EIF2AK2, MCTS2, SBNO1, PUS1, TRRAP, ECE1, EZR, CEBPZ, AATF, SCARB1, RBM25, HELLS, MEPCE, MSH3, NF1, AKAP8L, ITGA3, ATAD5, STAT1, EIF2B1, ATM, IWS1, DDX58, PPIF, IRF9, MED31, MNAT1, SRFBP1, TFR…	32.1538
GOTERM_BP_FAT	GO:0006366~transcription from RNA polymerase II promoter	29	NAMPT, PUS1, HELZ2, CCNT1, EZH2, BUD31, KDM1A, CDKN2A, EZR, GTF2A1, ELOF1, CEBPZ, H2AFY, AATF, IFRD1, MEPCE, CCNH, MED12, AKAP8L, ITGA3, ARID1A, STAT1, SUZ12, MED19, DDX58, MNAT1, TIMELESS, IRF2BPL, JUN	35.4407
GOTERM_BP_FAT	GO:0045935~positive regulation of nucleobase-containing compound metabolic process	28	NAMPT, ELF2, PUS1, HELZ2, CCNT1, KDM1A, CDKN2A, ECE1, ELOF1, CEBPZ, AATF, IFRD1, CCNH, NF1, MED12, AKAP8L, ATAD5, ARID1A, STAT1, ATM, MED19, DDX58, MNAT1, TFRC, TIMELESS, RFC2, IRF2BPL, JUN	37.892
GOTERM_BP_FAT	GO:0006357~regulation of transcription from RNA polymerase II promoter	29	NAMPT, ELF2, PUS1, HELZ2, CCNT1, EZH2, BUD31, KDM1A, CDKN2A, EZR, CEBPZ, H2AFY, AATF, IFRD1, MEPCE, CCNH, MED12, AKAP8L, ITGA3, ARID1A, STAT1, MED31, SUZ12, MED19, DDX58, MNAT1, TIMELESS, IRF2BPL, JUN	50.8381
GOTERM_BP_FAT	GO:0006355~regulation of transcription, DNA-templated	50	NAMPT, ELF2, HELZ2, CCNT1, EZH2, PDLIM1, BUD31, NONO, ESF1, KDM1A, CDKN2A, GTF2A1, ELOF1, H2AFY, IFRD1, CCNH, PRKCI, MED12, ARID1A, POLR1B, PARP10, SUZ12, MED19, BAZ1A, TIMELESS, JUN, PARP14, DNTTIP2, EIF2AK2, MCTS2, SBNO1, PUS1, TRRAP, EZR, CEBPZ, AATF, MEPCE, HELLS, AKAP8L, ITGA3, STAT1, IWS1, MED31, IRF9, DDX58, MNAT1, SRFBP1, IRF2BPL, DDX54, ADAR	51.1731
GOTERM_BP_FAT	GO:1903506~regulation of nucleic acid-templated transcription	50	NAMPT, ELF2, HELZ2, CCNT1, EZH2, PDLIM1, BUD31, NONO, ESF1, KDM1A, CDKN2A, GTF2A1, ELOF1, H2AFY, IFRD1, CCNH, PRKCI, MED12, ARID1A, POLR1B, PARP10, SUZ12, MED19, BAZ1A, TIMELESS, JUN, PARP14, DNTTIP2, EIF2AK2, MCTS2, SBNO1, PUS1, TRRAP, EZR, CEBPZ, AATF, MEPCE, HELLS, AKAP8L, ITGA3, STAT1, IWS1, MED31, IRF9, DDX58, MNAT1, SRFBP1, IRF2BPL, DDX54, ADAR	51.6562
GOTERM_BP_FAT	GO:2001141~regulation of RNA biosynthetic process	50	NAMPT, ELF2, HELZ2, CCNT1, EZH2, PDLIM1, BUD31, NONO, ESF1, KDM1A, CDKN2A, GTF2A1, ELOF1, H2AFY, IFRD1, CCNH, PRKCI, MED12, ARID1A, POLR1B, PARP10, SUZ12, MED19, BAZ1A, TIMELESS, JUN, PARP14, DNTTIP2, EIF2AK2, MCTS2, SBNO1, PUS1, TRRAP, EZR, CEBPZ, AATF, MEPCE, HELLS, AKAP8L, ITGA3, STAT1, IWS1, MED31, IRF9, DDX58, MNAT1, SRFBP1, IRF2BPL, DDX54, ADAR	52.6239
GOTERM_BP_FAT	GO:0051252~regulation of RNA metabolic process	51	NAMPT, ELF2, HELZ2, CCNT1, EZH2, PDLIM1, BUD31, ESF1, NONO, KDM1A, CDKN2A, GTF2A1, ELOF1, H2AFY, IFRD1, CCNH, MED12, PRKCI, ARID1A, PARP10, POLR1B, MED19, SUZ12, BAZ1A, TIMELESS, PARP14, JUN, DNTTIP2, MCTS2, EIF2AK2, SBNO1, PUS1, TRRAP, EZR, CEBPZ, AATF, MEPCE, RBM25, HELLS, AKAP8L, ITGA3, STAT1, IWS1, MED31, DDX58, IRF9, MNAT1, SRFBP1, IRF2BPL, DDX54, ADAR	58.2157
GOTERM_BP_FAT	GO:0051173~positive regulation of nitrogen compound metabolic process	28	NAMPT, ELF2, PUS1, HELZ2, CCNT1, KDM1A, CDKN2A, ECE1, ELOF1, CEBPZ, AATF, IFRD1, CCNH, NF1, MED12, AKAP8L, ATAD5, ARID1A, STAT1, ATM, MED19, DDX58, MNAT1, TFRC, TIMELESS, RFC2, IRF2BPL, JUN	60.7566
GOTERM_BP_FAT	GO:0045944~positive regulation of transcription from RNA polymerase II promoter	18	NAMPT, PUS1, HELZ2, CCNH, CCNT1, MED12, AKAP8L, STAT1, MED19, DDX58, MNAT1, KDM1A, CDKN2A, IRF2BPL, JUN, CEBPZ, AATF, IFRD1	77.5442
GOTERM_BP_FAT	GO:2000112~regulation of cellular macromolecule biosynthetic process	53	NAMPT, ELF2, HELZ2, CCNT1, EZH2, PDLIM1, BUD31, ESF1, NONO, KDM1A, CDKN2A, GTF2A1, ELOF1, H2AFY, IFRD1, CCNH, MED12, PRKCI, ARID1A, PARP10, POLR1B, MED19, SUZ12, BAZ1A, TIMELESS, RFC2, PARP14, JUN, DNTTIP2, MCTS2, EIF2AK2, SBNO1, PUS1, TRRAP, EZR, CEBPZ, AATF, HELLS, MEPCE, AKAP8L, ITGA3, STAT1, EIF2B1, ATM, IWS1, MED31, DDX58, IRF9, MNAT1, SRFBP1, IRF2BPL, DDX54, ADAR	77.8636
GOTERM_BP_FAT	GO:0034645~cellular macromolecule biosynthetic process	64	NAMPT, ELF2, HELZ2, EZH2, CCNT1, PDLIM1, BUD31, PRIM1, ESF1, NONO, KDM1A, CDKN2A, GTF2A1, ELOF1, PRIM2, H2AFY, ORC6, IFRD1, ORC2, CCNH, DTL, MED12, PRKCI, ARID1A, PARP10, POLR1B, MED19, SUZ12, BAZ1A, TIMELESS, RFC2, PARP14, RRM2, JUN, DNTTIP2, EIF2AK2, MCTS2, SBNO1, PUS1, TRRAP, EZR, CEBPZ, AATF, RSL24D1, HELLS, MEPCE, POLR3H, AKAP8L, ITGA3, ATAD5, STAT1, EIF2B1, ATM, IWS1, DDX58, IRF9, MED31, NM…	78.3389
GOTERM_BP_FAT	GO:0031328~positive regulation of cellular biosynthetic process	26	NAMPT, ELF2, PUS1, HELZ2, CCNT1, KDM1A, ECE1, CDKN2A, ELOF1, CEBPZ, SCARB1, AATF, IFRD1, CCNH, NF1, MED12, AKAP8L, ARID1A, STAT1, ATM, MED19, DDX58, MNAT1, RFC2, IRF2BPL, JUN	84.656
GOTERM_BP_FAT	GO:0010556~regulation of macromolecule biosynthetic process	53	NAMPT, ELF2, HELZ2, CCNT1, EZH2, PDLIM1, BUD31, ESF1, NONO, KDM1A, CDKN2A, GTF2A1, ELOF1, H2AFY, IFRD1, CCNH, MED12, PRKCI, ARID1A, PARP10, POLR1B, MED19, SUZ12, BAZ1A, TIMELESS, RFC2, PARP14, JUN, DNTTIP2, MCTS2, EIF2AK2, SBNO1, PUS1, TRRAP, EZR, CEBPZ, AATF, HELLS, MEPCE, AKAP8L, ITGA3, STAT1, EIF2B1, ATM, IWS1, MED31, DDX58, IRF9, MNAT1, SRFBP1, IRF2BPL, DDX54, ADAR	87.8546
GOTERM_BP_FAT	GO:0045893~positive regulation of transcription, DNA-templated	21	NAMPT, ELF2, PUS1, HELZ2, CCNH, CCNT1, MED12, AKAP8L, ARID1A, STAT1, MED19, DDX58, KDM1A, MNAT1, CDKN2A, ELOF1, IRF2BPL, JUN, CEBPZ, AATF, IFRD1	88.464
GOTERM_BP_FAT	GO:1903508~positive regulation of nucleic acid-templated transcription	21	NAMPT, ELF2, PUS1, HELZ2, CCNH, CCNT1, MED12, AKAP8L, ARID1A, STAT1, MED19, DDX58, KDM1A, MNAT1, CDKN2A, ELOF1, IRF2BPL, JUN, CEBPZ, AATF, IFRD1	88.464
GOTERM_BP_FAT	GO:1902680~positive regulation of RNA biosynthetic process	21	NAMPT, ELF2, PUS1, HELZ2, CCNH, CCNT1, MED12, AKAP8L, ARID1A, STAT1, MED19, DDX58, KDM1A, MNAT1, CDKN2A, ELOF1, IRF2BPL, JUN, CEBPZ, AATF, IFRD1	89.0238
GOTERM_BP_FAT	GO:0009891~positive regulation of biosynthetic process	26	NAMPT, ELF2, PUS1, HELZ2, CCNT1, KDM1A, ECE1, CDKN2A, ELOF1, CEBPZ, SCARB1, AATF, IFRD1, CCNH, NF1, MED12, AKAP8L, ARID1A, STAT1, ATM, MED19, DDX58, MNAT1, RFC2, IRF2BPL, JUN	89.3731
GOTERM_BP_FAT	GO:0010468~regulation of gene expression	56	NAMPT, ELF2, HELZ2, CCNT1, EZH2, PDLIM1, BUD31, TAPBP, ESF1, NONO, KDM1A, CDKN2A, GTF2A1, ELOF1, H2AFY, IFRD1, CCNH, MED12, PRKCI, ARID1A, PARP10, POLR1B, MED19, SUZ12, BAZ1A, TIMELESS, PARP14, JUN, DNTTIP2, EIF2AK2, MCTS2, SBNO1, PUS1, TRRAP, EZR, APBA3, CEBPZ, AATF, RBM25, HELLS, MEPCE, NF1, AKAP8L, ITGA3, STAT1, EIF2B1, ATM, IWS1, MED31, DDX58, IRF9, MNAT1, SRFBP1, IRF2BPL, DDX54, ADAR	91.5899
GOTERM_BP_FAT	GO:0010628~positive regulation of gene expression	25	NAMPT, ELF2, PUS1, HELZ2, CCNT1, KDM1A, CDKN2A, EZR, ELOF1, CEBPZ, H2AFY, AATF, IFRD1, CCNH, AKAP8L, MED12, ARID1A, ITGA3, STAT1, DDX58, MED19, MNAT1, IRF2BPL, JUN, ADAR	93.8589
GOTERM_BP_FAT	GO:0051254~positive regulation of RNA metabolic process	21	NAMPT, ELF2, PUS1, HELZ2, CCNH, CCNT1, MED12, AKAP8L, ARID1A, STAT1, MED19, DDX58, KDM1A, MNAT1, CDKN2A, ELOF1, IRF2BPL, JUN, CEBPZ, AATF, IFRD1	94.8297
GOTERM_BP_FAT	GO:0010557~positive regulation of macromolecule biosynthetic process	23	NAMPT, ELF2, PUS1, CCNH, HELZ2, CCNT1, MED12, AKAP8L, ARID1A, STAT1, ATM, MED19, DDX58, KDM1A, MNAT1, CDKN2A, ELOF1, RFC2, IRF2BPL, JUN, CEBPZ, AATF, IFRD1	96.102
GOTERM_BP_FAT	GO:0010604~positive regulation of macromolecule metabolic process	35	NAMPT, ELF2, PUS1, HELZ2, CCNT1, EZH2, CDH2, KDM1A, EZR, CDKN2A, ECE1, ELOF1, CEBPZ, H2AFY, AATF, IFRD1, CCNH, MED12, AKAP8L, ARID1A, ATAD5, ITGA3, STAT1, ATM, DDX58, MED19, MNAT1, TFRC, TIMELESS, RFC2, IRF2BPL, JUN, RASSF1, EIF2AK2, ADAR	99.9083
GOTERM_BP_FAT	GO:0009893~positive regulation of metabolic process	37	NAMPT, ELF2, PUS1, HELZ2, CCNT1, EZH2, CDH2, KDM1A, EZR, CDKN2A, ECE1, ELOF1, CEBPZ, H2AFY, AATF, SCARB1, IFRD1, CCNH, NF1, MED12, AKAP8L, ARID1A, ATAD5, ITGA3, STAT1, ATM, DDX58, MED19, MNAT1, TFRC, TIMELESS, RFC2, IRF2BPL, JUN, RASSF1, EIF2AK2, ADAR	99.9579
GOTERM_BP_FAT	GO:0031325~positive regulation of cellular metabolic process	34	NAMPT, ELF2, PUS1, HELZ2, CCNT1, EZH2, CDH2, KDM1A, CDKN2A, EZR, ECE1, ELOF1, CEBPZ, AATF, SCARB1, IFRD1, CCNH, NF1, MED12, AKAP8L, ARID1A, ATAD5, STAT1, ATM, MED19, DDX58, MNAT1, TFRC, TIMELESS, RFC2, IRF2BPL, JUN, RASSF1, EIF2AK2	99.9775
Annotation Cluster 13	Enrichment Score: 1.6283229925131932
Category	Term	Count	Genes	FDR
GOTERM_BP_FAT	GO:0048525~negative regulation of viral process	8	BST2, ISG15, JUN, PARP10, STAT1, EIF2AK2, DHX58, ADAR	0.220964
GOTERM_BP_FAT	GO:0048524~positive regulation of viral process	3	JUN, DHX58, ADAR	99.0157
GOTERM_BP_FAT	GO:0043902~positive regulation of multi-organism process	3	JUN, DHX58, ADAR	99.9992
Annotation Cluster 14	Enrichment Score: 1.6079957731782337
Category	Term	Count	Genes	FDR
GOTERM_BP_FAT	GO:0042255~ribosome assembly	5	PPAN, SBDS, RSL24D1, MDN1, PWP2	10.3604
GOTERM_BP_FAT	GO:0000027~ribosomal large subunit assembly	3	PPAN, RSL24D1, MDN1	55.8025
GOTERM_BP_FAT	GO:0042273~ribosomal large subunit biogenesis	4	PPAN, SDAD1, RSL24D1, MDN1	65.3803
Annotation Cluster 15	Enrichment Score: 1.5529194954557943
Category	Term	Count	Genes	FDR
GOTERM_BP_FAT	GO:0051100~negative regulation of binding	7	IFIT2, KDM1A, NES, CDKN2A, JUN, MEPCE, B2M	7.19742
Annotation Cluster 1	Enrichment Score: 5.835306001103731
Category	Term	Count	Genes	FDR
GOTERM_CC_FAT	GO:0030684~preribosome	13	NOP14, PPAN, CMSS1, PDCD11, NOC4L, SRFBP1, UTP6, MPHOSPH10, RRP9, UTP20, MDN1, PWP2, WDR46	2.97308e-07
GOTERM_CC_FAT	GO:0030686~90S preribosome	9	NOP14, CMSS1, NOC4L, SRFBP1, UTP6, MPHOSPH10, UTP20, WDR46, PWP2	2.21515e-06
GOTERM_CC_FAT	GO:0032040~small-subunit processome	9	NOP14, PDCD11, NOC4L, UTP6, MPHOSPH10, RRP9, UTP20, WDR46, PWP2	1.97559e-05
GOTERM_CC_FAT	GO:0030529~intracellular ribonucleoprotein complex	25	NAF1, UTP6, BUD31, PPAN, RSL24D1, MDN1, RBM25, ZCCHC8, PDCD11, GEMIN2, NOC4L, LGALS3, MPHOSPH10, RRP9, PWP2, NOP14, CMSS1, SRFBP1, SLU7, MCTS2, UTP20, PRPF38B, WDR46, TXNL4A, ADAR	1.23142
GOTERM_CC_FAT	GO:1990904~ribonucleoprotein complex	25	NAF1, UTP6, BUD31, PPAN, RSL24D1, MDN1, RBM25, ZCCHC8, PDCD11, GEMIN2, NOC4L, LGALS3, MPHOSPH10, RRP9, PWP2, NOP14, CMSS1, SRFBP1, SLU7, MCTS2, UTP20, PRPF38B, WDR46, TXNL4A, ADAR	1.2497
GOTERM_CC_FAT	GO:0005681~spliceosomal complex	9	GEMIN2, LGALS3, SLU7, BUD31, RBM25, PRPF38B, TXNL4A, ADAR, ZCCHC8	3.58406
Annotation Cluster 2	Enrichment Score: 5.08705536085126
Category	Term	Count	Genes	FDR
GOTERM_CC_FAT	GO:0005694~chromosome	37	PUS1, EZH2, TTK, H1FX, TRRAP, BUD31, PRIM1, DDX27, KDM1A, CDCA8, CDKN2A, PRIM2, H2AFY, ORC6, ORC2, HELLS, PDS5B, MSH3, DSN1, DTL, MPHOSPH10, AKAP8L, SMC6, ARID1A, RAD9A, STAT1, NCAPD3, ATM, SUZ12, BAZ1A, NSMCE4A, TIMELESS, RFC2, JUN, RBM19, CHAF1A, EP400	1.04335e-05
GOTERM_CC_FAT	GO:0044427~chromosomal part	31	PUS1, EZH2, TTK, H1FX, TRRAP, BUD31, PRIM1, KDM1A, CDCA8, CDKN2A, PRIM2, H2AFY, ORC6, HELLS, ORC2, PDS5B, DSN1, AKAP8L, SMC6, RAD9A, ARID1A, STAT1, NCAPD3, ATM, SUZ12, TIMELESS, NSMCE4A, RFC2, JUN, CHAF1A, EP400	0.000936794
GOTERM_CC_FAT	GO:0000228~nuclear chromosome	22	PUS1, MSH3, DSN1, EZH2, ARID1A, RAD9A, TRRAP, STAT1, BUD31, NCAPD3, PRIM1, SUZ12, KDM1A, BAZ1A, TIMELESS, JUN, PRIM2, H2AFY, ORC6, CHAF1A, EP400, ORC2	0.0306435
GOTERM_CC_FAT	GO:0000785~chromatin	20	PDS5B, PUS1, EZH2, AKAP8L, ARID1A, H1FX, TRRAP, STAT1, BUD31, NCAPD3, SUZ12, KDM1A, CDKN2A, TIMELESS, JUN, H2AFY, CHAF1A, HELLS, EP400, ORC2	0.0567745
GOTERM_CC_FAT	GO:0044454~nuclear chromosome part	20	PUS1, DSN1, EZH2, RAD9A, ARID1A, TRRAP, STAT1, BUD31, NCAPD3, PRIM1, SUZ12, KDM1A, TIMELESS, JUN, PRIM2, H2AFY, ORC6, CHAF1A, EP400, ORC2	0.135156
GOTERM_CC_FAT	GO:0000790~nuclear chromatin	14	PUS1, EZH2, ARID1A, TRRAP, STAT1, BUD31, NCAPD3, SUZ12, KDM1A, TIMELESS, JUN, H2AFY, CHAF1A, EP400	0.986075
Annotation Cluster 3	Enrichment Score: 3.9544335219585185
Category	Term	Count	Genes	FDR
GOTERM_CC_FAT	GO:0018995~host	6	GBP7, TAP2, TAP1, GBP9, IIGP1, GBP2	0.00796786
GOTERM_CC_FAT	GO:0043657~host cell	6	GBP7, TAP2, TAP1, GBP9, IIGP1, GBP2	0.00796786
GOTERM_CC_FAT	GO:0044215~other organism	6	GBP7, TAP2, TAP1, GBP9, IIGP1, GBP2	0.01613
GOTERM_CC_FAT	GO:0044217~other organism part	6	GBP7, TAP2, TAP1, GBP9, IIGP1, GBP2	0.01613
GOTERM_CC_FAT	GO:0044216~other organism cell	6	GBP7, TAP2, TAP1, GBP9, IIGP1, GBP2	0.01613
GOTERM_CC_FAT	GO:0020005~symbiont-containing vacuole membrane	4	GBP7, GBP9, IIGP1, GBP2	0.155661
GOTERM_CC_FAT	GO:0020003~symbiont-containing vacuole	4	GBP7, GBP9, IIGP1, GBP2	0.32703
GOTERM_CC_FAT	GO:0065010~extracellular membrane-bounded organelle	4	GBP7, GBP9, IIGP1, GBP2	0.587585
GOTERM_CC_FAT	GO:0030430~host cell cytoplasm	4	GBP7, GBP9, IIGP1, GBP2	0.952333
GOTERM_CC_FAT	GO:0033655~host cell cytoplasm part	4	GBP7, GBP9, IIGP1, GBP2	0.952333
GOTERM_CC_FAT	GO:0043656~intracellular region of host	4	GBP7, GBP9, IIGP1, GBP2	1.43444
GOTERM_CC_FAT	GO:0033646~host intracellular part	4	GBP7, GBP9, IIGP1, GBP2	1.43444
GOTERM_CC_FAT	GO:0033643~host cell part	4	GBP7, GBP9, IIGP1, GBP2	2.0452
Annotation Cluster 4	Enrichment Score: 2.5824891946135726
Category	Term	Count	Genes	FDR
GOTERM_CC_FAT	GO:0055029~nuclear DNA-directed RNA polymerase complex	9	MED31, PRIM1, MNAT1, POLR3H, GTF2A1, CCNH, PRIM2, POLR1B, TRRAP	0.219077
GOTERM_CC_FAT	GO:0000428~DNA-directed RNA polymerase complex	9	MED31, PRIM1, MNAT1, POLR3H, GTF2A1, CCNH, PRIM2, POLR1B, TRRAP	0.219077
GOTERM_CC_FAT	GO:0030880~RNA polymerase complex	9	MED31, PRIM1, MNAT1, POLR3H, GTF2A1, CCNH, PRIM2, POLR1B, TRRAP	0.245621
GOTERM_CC_FAT	GO:0061695~transferase complex, transferring phosphorus-containing groups	11	MED31, PRIM1, MNAT1, POLR3H, GTF2A1, CCNH, CCNT1, PRIM2, POLR1B, TRRAP, PRPS2	1.41302
GOTERM_CC_FAT	GO:0090575~RNA polymerase II transcription factor complex	6	MED31, NONO, MNAT1, GTF2A1, CCNH, TRRAP	14.2666
GOTERM_CC_FAT	GO:0044798~nuclear transcription factor complex	6	MED31, NONO, MNAT1, GTF2A1, CCNH, TRRAP	32.5122
GOTERM_CC_FAT	GO:0016591~DNA-directed RNA polymerase II, holoenzyme	5	MED31, MNAT1, GTF2A1, CCNH, TRRAP	39.3673
GOTERM_CC_FAT	GO:0005667~transcription factor complex	10	MED31, NONO, KDM1A, MNAT1, PUS1, GTF2A1, CCNH, JUN, PDLIM1, TRRAP	49.3905
Annotation Cluster 5	Enrichment Score: 1.7553761507947623
Category	Term	Count	Genes	FDR
GOTERM_CC_FAT	GO:0000792~heterochromatin	6	SUZ12, CDKN2A, H2AFY, ORC2, NCAPD3, HELLS	7.41007
Annotation Cluster 1	Enrichment Score: 14.04646597318399
Category	Term	Count	Genes	FDR
GOTERM_MF_FAT	GO:0003723~RNA binding	70	NAF1, HELZ2, EZH2, CCNT1, H2-D1, H1FX, RPS19BP1, NONO, DDX27, ESF1, KDM1A, SBDS, CDKN2A, ELOF1, DHX37, OASL2, DDX24, DDX10, ZCCHC8, H2-K1, BST2, RRP9, SUZ12, CMSS1, JUN, DDX31, SLU7, DNTTIP2, EIF2AK2, MCTS2, CPSF2, PRPF38B, WDR46, IFIH1, PUS1, UTP6, PUS7, DIMT1, PPAN, EZR, REXO4, MORC3, PPIL4, CEBPZ, AATF, DHX58, RBM25, NSUN5, MEPCE, PDCD11, RRP12, NOC4L, LGALS3, AKAP8L, MPHOSPH10, EIF2B1, PWP2, …	7.27138e-19
GOTERM_MF_FAT	GO:0044822~poly(A) RNA binding	53	NAF1, HELZ2, H2-D1, H1FX, RPS19BP1, DDX27, ESF1, NONO, SBDS, CDKN2A, DHX37, DDX24, DDX10, ZCCHC8, H2-K1, BST2, RRP9, CMSS1, JUN, DDX31, DNTTIP2, EIF2AK2, PRPF38B, WDR46, PUS1, PUS7, DIMT1, PPAN, EZR, REXO4, PPIL4, CEBPZ, AATF, RBM25, NSUN5, MEPCE, PDCD11, RRP12, NOC4L, LGALS3, AKAP8L, MPHOSPH10, NOP14, IFIT2, DDX56, DDX55, TFRC, SRFBP1, RBM19, DDX54, UTP20, DDX51, ADAR	1.92231e-14
GOTERM_MF_FAT	GO:0003676~nucleic acid binding	91	NAF1, ELF2, HELZ2, EZH2, CCNT1, H2-D1, H1FX, CMTR1, RPS19BP1, NONO, ESF1, DDX27, PRIM1, KDM1A, SBDS, CDKN2A, GTF2A1, ELOF1, DHX37, OASL2, DDX24, PRIM2, H2AFY, ORC6, DDX10, ORC2, ZCCHC8, H2-K1, BST2, MED12, ARID1A, POLR1B, RRP9, SUZ12, CMSS1, RFC2, JUN, DDX31, SLU7, DNTTIP2, EIF2AK2, MCTS2, CPSF2, PRPF38B, EP400, WDR46, IFIH1, PUS1, UTP6, CERS5, PUS7, DIMT1, PPAN, EZR, REXO4, MORC3, CEBPZ, PPIL4, …	1.44422e-08
GOTERM_MF_FAT	GO:1901363~heterocyclic compound binding	116	NAF1, TTK, CMTR1, H1FX, NONO, ESF1, DDX27, PRIM1, KDM1A, CDKN2A, DHX37, OASL2, DDX24, PRIM2, H2AFY, ORC6, MLKL, DDX10, DCTPP1, ORC2, GBP7, BST2, GBP9, MED12, ARID1A, RRP9, SUZ12, RENBP, RFC2, JUN, PARP14, DDX31, SLU7, DNTTIP2, MCTS2, EIF2AK2, PRPS2, EP400, GBP2, IFIH1, PUS1, CERS5, PUS7, PPAN, PPIL4, IIGP1, DHX58, HELLS, MEPCE, LGALS3, NOC4L, AKAP8L, MPHOSPH10, ATAD5, ATM, DDX58, NOP14, DDX56, DD…	2.67926e-08
GOTERM_MF_FAT	GO:0097159~organic cyclic compound binding	116	NAF1, TTK, CMTR1, H1FX, NONO, ESF1, DDX27, PRIM1, KDM1A, CDKN2A, DHX37, OASL2, DDX24, PRIM2, H2AFY, ORC6, MLKL, DDX10, DCTPP1, ORC2, GBP7, BST2, GBP9, MED12, ARID1A, RRP9, SUZ12, RENBP, RFC2, JUN, PARP14, DDX31, SLU7, DNTTIP2, MCTS2, EIF2AK2, PRPS2, EP400, GBP2, IFIH1, PUS1, CERS5, PUS7, PPAN, PPIL4, IIGP1, DHX58, HELLS, MEPCE, LGALS3, NOC4L, AKAP8L, MPHOSPH10, ATAD5, ATM, DDX58, NOP14, DDX56, DD…	7.51392e-08
Annotation Cluster 2	Enrichment Score: 5.2044187193243125
Category	Term	Count	Genes	FDR
GOTERM_MF_FAT	GO:0004386~helicase activity	15	IFIH1, HELZ2, DDX27, DDX58, DDX56, DDX55, DHX37, DDX24, DDX31, DDX10, DDX54, HELLS, DHX58, EP400, DDX51	1.95044e-06
GOTERM_MF_FAT	GO:0016462~pyrophosphatase activity	31	IFIH1, HELZ2, RNF213, DDX27, TOR3A, IGTP, DHX37, TAP2, TAP1, DDX24, IIGP1, DDX10, MDN1, DCTPP1, DHX58, HELLS, GBP7, CCNH, NUDT14, GBP9, KIF15, DDX58, MNAT1, DDX56, DDX55, RFC2, DDX31, DDX54, GBP2, EP400, DDX51	9.51378e-06
GOTERM_MF_FAT	GO:0016818~hydrolase activity, acting on acid anhydrides, in phosphorus-containing anhydrides	31	IFIH1, HELZ2, RNF213, DDX27, TOR3A, IGTP, DHX37, TAP2, TAP1, DDX24, IIGP1, DDX10, MDN1, DCTPP1, DHX58, HELLS, GBP7, CCNH, NUDT14, GBP9, KIF15, DDX58, MNAT1, DDX56, DDX55, RFC2, DDX31, DDX54, GBP2, EP400, DDX51	1.00818e-05
GOTERM_MF_FAT	GO:0016817~hydrolase activity, acting on acid anhydrides	31	IFIH1, HELZ2, RNF213, DDX27, TOR3A, IGTP, DHX37, TAP2, TAP1, DDX24, IIGP1, DDX10, MDN1, DCTPP1, DHX58, HELLS, GBP7, CCNH, NUDT14, GBP9, KIF15, DDX58, MNAT1, DDX56, DDX55, RFC2, DDX31, DDX54, GBP2, EP400, DDX51	1.0994e-05
GOTERM_MF_FAT	GO:0017111~nucleoside-triphosphatase activity	29	IFIH1, HELZ2, RNF213, DDX27, TOR3A, IGTP, DHX37, TAP2, TAP1, DDX24, IIGP1, DDX10, MDN1, DHX58, HELLS, GBP7, CCNH, GBP9, KIF15, DDX58, MNAT1, DDX56, DDX55, RFC2, DDX31, DDX54, GBP2, EP400, DDX51	3.90316e-05
GOTERM_MF_FAT	GO:0004004~ATP-dependent RNA helicase activity	9	DDX27, DDX56, DDX55, DHX37, DDX24, DDX31, DDX10, DDX54, DDX51	0.000958541
GOTERM_MF_FAT	GO:0008186~RNA-dependent ATPase activity	9	DDX27, DDX56, DDX55, DHX37, DDX24, DDX31, DDX10, DDX54, DDX51	0.00108245
GOTERM_MF_FAT	GO:0003724~RNA helicase activity	9	DDX27, DDX56, DDX55, DHX37, DDX24, DDX31, DDX10, DDX54, DDX51	0.0012198
GOTERM_MF_FAT	GO:0016887~ATPase activity	18	CCNH, KIF15, RNF213, DDX27, MNAT1, TOR3A, DDX56, DDX55, RFC2, DHX37, TAP2, TAP1, DDX24, DDX31, DDX10, DDX54, MDN1, DDX51	0.0127874
GOTERM_MF_FAT	GO:0070035~purine NTP-dependent helicase activity	9	DDX27, DDX56, DDX55, DHX37, DDX24, DDX31, DDX10, DDX54, DDX51	0.0210196
GOTERM_MF_FAT	GO:0008026~ATP-dependent helicase activity	9	DDX27, DDX56, DDX55, DHX37, DDX24, DDX31, DDX10, DDX54, DDX51	0.0210196
GOTERM_MF_FAT	GO:0097367~carbohydrate derivative binding	49	NRP2, HELZ2, DPH6, TTK, B2M, DDX27, TOR3A, DHX37, OASL2, DDX24, MLKL, DDX10, MDN1, DCTPP1, GBP7, GBP9, KIF15, PRKCI, POLR1B, GLTP, RENBP, RFC2, DDX31, EIF2AK2, PRPS2, EP400, GBP2, IFIH1, DCK, GPHN, IGTP, TAP2, TAP1, IIGP1, SCARB1, DHX58, HELLS, MSH3, SMC6, ATAD5, ITGA3, EIF2B1, ATM, DDX58, DDX56, DDX55, TFRC, DDX54, DDX51	0.0214269
GOTERM_MF_FAT	GO:0032549~ribonucleoside binding	42	IFIH1, HELZ2, DPH6, DCK, TTK, DDX27, TOR3A, GPHN, IGTP, DHX37, TAP2, OASL2, TAP1, DDX24, IIGP1, MLKL, DDX10, MDN1, DHX58, HELLS, GBP7, MSH3, KIF15, GBP9, PRKCI, SMC6, ATAD5, POLR1B, EIF2B1, ATM, DDX58, DDX56, RENBP, DDX55, RFC2, DDX31, DDX54, EIF2AK2, GBP2, EP400, PRPS2, DDX51	0.0469456
GOTERM_MF_FAT	GO:0001882~nucleoside binding	42	IFIH1, HELZ2, DPH6, DCK, TTK, DDX27, TOR3A, GPHN, IGTP, DHX37, TAP2, OASL2, TAP1, DDX24, IIGP1, MLKL, DDX10, MDN1, DHX58, HELLS, GBP7, MSH3, KIF15, GBP9, PRKCI, SMC6, ATAD5, POLR1B, EIF2B1, ATM, DDX58, DDX56, RENBP, DDX55, RFC2, DDX31, DDX54, EIF2AK2, GBP2, EP400, PRPS2, DDX51	0.0518082
GOTERM_MF_FAT	GO:0036094~small molecule binding	53	CRABP1, HELZ2, DPH6, TTK, DDX27, NONO, KDM1A, TOR3A, DHX37, OASL2, DDX24, MLKL, DDX10, MDN1, DCTPP1, GBP7, BSG, KIF15, GBP9, PRKCI, POLR1B, RENBP, RFC2, PARP14, DDX31, EIF2AK2, GBP2, EP400, PRPS2, IFIH1, DCK, ADH7, GPHN, IGTP, TAP2, TAP1, PPIL4, IIGP1, HELLS, DHX58, RBM25, MSH3, LGALS3, SMC6, ATAD5, EIF2B1, ATM, DDX58, DDX56, DDX55, RBM19, DDX54, DDX51	0.0621228
GOTERM_MF_FAT	GO:0035639~purine ribonucleoside triphosphate binding	41	IFIH1, HELZ2, DPH6, DCK, TTK, DDX27, TOR3A, GPHN, IGTP, DHX37, TAP2, OASL2, TAP1, DDX24, IIGP1, MLKL, DDX10, MDN1, DHX58, HELLS, GBP7, MSH3, KIF15, GBP9, PRKCI, SMC6, ATAD5, EIF2B1, ATM, DDX58, DDX56, RENBP, DDX55, RFC2, DDX31, DDX54, EIF2AK2, GBP2, EP400, PRPS2, DDX51	0.0851029
GOTERM_MF_FAT	GO:0032550~purine ribonucleoside binding	41	IFIH1, HELZ2, DPH6, DCK, TTK, DDX27, TOR3A, GPHN, IGTP, DHX37, TAP2, OASL2, TAP1, DDX24, IIGP1, MLKL, DDX10, MDN1, DHX58, HELLS, GBP7, MSH3, KIF15, GBP9, PRKCI, SMC6, ATAD5, EIF2B1, ATM, DDX58, DDX56, RENBP, DDX55, RFC2, DDX31, DDX54, EIF2AK2, GBP2, EP400, PRPS2, DDX51	0.100529
GOTERM_MF_FAT	GO:0042623~ATPase activity, coupled	14	CCNH, DDX27, MNAT1, DDX56, DDX55, RFC2, DHX37, TAP2, TAP1, DDX24, DDX31, DDX10, DDX54, DDX51	0.101412
GOTERM_MF_FAT	GO:0001883~purine nucleoside binding	41	IFIH1, HELZ2, DPH6, DCK, TTK, DDX27, TOR3A, GPHN, IGTP, DHX37, TAP2, OASL2, TAP1, DDX24, IIGP1, MLKL, DDX10, MDN1, DHX58, HELLS, GBP7, MSH3, KIF15, GBP9, PRKCI, SMC6, ATAD5, EIF2B1, ATM, DDX58, DDX56, RENBP, DDX55, RFC2, DDX31, DDX54, EIF2AK2, GBP2, EP400, PRPS2, DDX51	0.104151
GOTERM_MF_FAT	GO:0000166~nucleotide binding	49	HELZ2, DPH6, TTK, NONO, DDX27, TOR3A, KDM1A, DHX37, OASL2, DDX24, MLKL, DDX10, MDN1, DCTPP1, GBP7, GBP9, KIF15, PRKCI, RENBP, RFC2, PARP14, DDX31, EIF2AK2, PRPS2, EP400, GBP2, IFIH1, DCK, ADH7, GPHN, IGTP, TAP2, TAP1, PPIL4, IIGP1, RBM25, DHX58, HELLS, MSH3, SMC6, ATAD5, EIF2B1, ATM, DDX58, DDX56, DDX55, RBM19, DDX54, DDX51	0.126349
GOTERM_MF_FAT	GO:1901265~nucleoside phosphate binding	49	HELZ2, DPH6, TTK, NONO, DDX27, TOR3A, KDM1A, DHX37, OASL2, DDX24, MLKL, DDX10, MDN1, DCTPP1, GBP7, GBP9, KIF15, PRKCI, RENBP, RFC2, PARP14, DDX31, EIF2AK2, PRPS2, EP400, GBP2, IFIH1, DCK, ADH7, GPHN, IGTP, TAP2, TAP1, PPIL4, IIGP1, RBM25, DHX58, HELLS, MSH3, SMC6, ATAD5, EIF2B1, ATM, DDX58, DDX56, DDX55, RBM19, DDX54, DDX51	0.126349
GOTERM_MF_FAT	GO:0005524~ATP binding	35	IFIH1, HELZ2, DPH6, DCK, TTK, DDX27, TOR3A, GPHN, DHX37, TAP2, OASL2, TAP1, DDX24, MLKL, DDX10, MDN1, DHX58, HELLS, MSH3, KIF15, PRKCI, SMC6, ATAD5, ATM, DDX58, DDX56, RENBP, DDX55, RFC2, DDX31, EIF2AK2, DDX54, PRPS2, EP400, DDX51	0.138642
GOTERM_MF_FAT	GO:0032555~purine ribonucleotide binding	41	IFIH1, HELZ2, DPH6, DCK, TTK, DDX27, TOR3A, GPHN, IGTP, DHX37, TAP2, OASL2, TAP1, DDX24, IIGP1, MLKL, DDX10, MDN1, DHX58, HELLS, GBP7, MSH3, KIF15, GBP9, PRKCI, SMC6, ATAD5, EIF2B1, ATM, DDX58, DDX56, RENBP, DDX55, RFC2, DDX31, DDX54, EIF2AK2, GBP2, EP400, PRPS2, DDX51	0.152623
GOTERM_MF_FAT	GO:0017076~purine nucleotide binding	41	IFIH1, HELZ2, DPH6, DCK, TTK, DDX27, TOR3A, GPHN, IGTP, DHX37, TAP2, OASL2, TAP1, DDX24, IIGP1, MLKL, DDX10, MDN1, DHX58, HELLS, GBP7, MSH3, KIF15, GBP9, PRKCI, SMC6, ATAD5, EIF2B1, ATM, DDX58, DDX56, RENBP, DDX55, RFC2, DDX31, DDX54, EIF2AK2, GBP2, EP400, PRPS2, DDX51	0.170926
GOTERM_MF_FAT	GO:0032553~ribonucleotide binding	41	IFIH1, HELZ2, DPH6, DCK, TTK, DDX27, TOR3A, GPHN, IGTP, DHX37, TAP2, OASL2, TAP1, DDX24, IIGP1, MLKL, DDX10, MDN1, DHX58, HELLS, GBP7, MSH3, KIF15, GBP9, PRKCI, SMC6, ATAD5, EIF2B1, ATM, DDX58, DDX56, RENBP, DDX55, RFC2, DDX31, DDX54, EIF2AK2, GBP2, EP400, PRPS2, DDX51	0.180805
GOTERM_MF_FAT	GO:0032559~adenyl ribonucleotide binding	35	IFIH1, HELZ2, DPH6, DCK, TTK, DDX27, TOR3A, GPHN, DHX37, TAP2, OASL2, TAP1, DDX24, MLKL, DDX10, MDN1, DHX58, HELLS, MSH3, KIF15, PRKCI, SMC6, ATAD5, ATM, DDX58, DDX56, RENBP, DDX55, RFC2, DDX31, EIF2AK2, DDX54, PRPS2, EP400, DDX51	0.232593
GOTERM_MF_FAT	GO:0030554~adenyl nucleotide binding	35	IFIH1, HELZ2, DPH6, DCK, TTK, DDX27, TOR3A, GPHN, DHX37, TAP2, OASL2, TAP1, DDX24, MLKL, DDX10, MDN1, DHX58, HELLS, MSH3, KIF15, PRKCI, SMC6, ATAD5, ATM, DDX58, DDX56, RENBP, DDX55, RFC2, DDX31, EIF2AK2, DDX54, PRPS2, EP400, DDX51	0.256535
Annotation Cluster 3	Enrichment Score: 4.03690357735903
Category	Term	Count	Genes	FDR
GOTERM_MF_FAT	GO:0046977~TAP binding	5	H2-K1, TAP2, TAP1, H2-D1, TAPBP	0.00758842
GOTERM_MF_FAT	GO:0046978~TAP1 binding	3	TAP2, TAP1, TAPBP	0.569889
GOTERM_MF_FAT	GO:0046979~TAP2 binding	3	TAP2, TAP1, TAPBP	0.569889
Annotation Cluster 4	Enrichment Score: 2.0605877069129157
Category	Term	Count	Genes	FDR
GOTERM_MF_FAT	GO:0098641~cadherin binding involved in cell-cell adhesion	10	F11R, BSG, EZR, H1FX, MPP7, NDRG1, PDLIM1, STAT1, GPRC5A, SPTAN1	7.00926
GOTERM_MF_FAT	GO:0098632~protein binding involved in cell-cell adhesion	10	F11R, BSG, EZR, H1FX, MPP7, NDRG1, PDLIM1, STAT1, GPRC5A, SPTAN1	8.32178
GOTERM_MF_FAT	GO:0098631~protein binding involved in cell adhesion	10	F11R, BSG, EZR, H1FX, MPP7, NDRG1, PDLIM1, STAT1, GPRC5A, SPTAN1	9.3643
GOTERM_MF_FAT	GO:0045296~cadherin binding	10	F11R, BSG, EZR, H1FX, MPP7, NDRG1, PDLIM1, STAT1, GPRC5A, SPTAN1	10.8724
GOTERM_MF_FAT	GO:0050839~cell adhesion molecule binding	11	F11R, BSG, EZR, H1FX, MPP7, NDRG1, PDLIM1, ITGA3, STAT1, GPRC5A, SPTAN1	39.2182
Annotation Cluster 5	Enrichment Score: 1.966780434450976
Category	Term	Count	Genes	FDR
GOTERM_MF_FAT	GO:0003713~transcription coactivator activity	10	MED31, KDM1A, PUS1, GTF2A1, HELZ2, JUN, MED12, PDLIM1, TRRAP, BUD31	2.42109
GOTERM_MF_FAT	GO:0003712~transcription cofactor activity	12	MED31, MED19, KDM1A, PUS1, GTF2A1, HELZ2, JUN, MED12, PDLIM1, TRRAP, DDX54, BUD31	15.2287
GOTERM_MF_FAT	GO:0000989~transcription factor activity, transcription factor binding	12	MED31, MED19, KDM1A, PUS1, GTF2A1, HELZ2, JUN, MED12, PDLIM1, TRRAP, DDX54, BUD31	32.2125
GOTERM_MF_FAT	GO:0000988~transcription factor activity, protein binding	12	MED31, MED19, KDM1A, PUS1, GTF2A1, HELZ2, JUN, MED12, PDLIM1, TRRAP, DDX54, BUD31	34.3121
Annotation Cluster 6	Enrichment Score: 1.9354842358682223
Category	Term	Count	Genes	FDR
GOTERM_MF_FAT	GO:0003899~DNA-directed RNA polymerase activity	4	PRIM1, POLR3H, PRIM2, POLR1B	12.8252
GOTERM_MF_FAT	GO:0034062~RNA polymerase activity	4	PRIM1, POLR3H, PRIM2, POLR1B	13.7148
GOTERM_MF_FAT	GO:0016779~nucleotidyltransferase activity	6	PRIM1, GPHN, POLR3H, OASL2, PRIM2, POLR1B	22.2058
Annotation Cluster 7	Enrichment Score: 1.8546459530801678
Category	Term	Count	Genes	FDR
GOTERM_MF_FAT	GO:0046977~TAP binding	5	H2-K1, TAP2, TAP1, H2-D1, TAPBP	0.00758842
GOTERM_MF_FAT	GO:0042605~peptide antigen binding	4	H2-K1, TAP2, TAP1, H2-D1	19.6217
GOTERM_MF_FAT	GO:0003823~antigen binding	5	H2-K1, TAP2, TAP1, H2-D1, EP400	86.5665
GOTERM_MF_FAT	GO:0042277~peptide binding	6	H2-K1, PPIF, TAP2, TAP1, APBA3, H2-D1	96.9797
GOTERM_MF_FAT	GO:0033218~amide binding	6	H2-K1, PPIF, TAP2, TAP1, APBA3, H2-D1	98.8394
Annotation Cluster 8	Enrichment Score: 1.7970893870170113
Category	Term	Count	Genes	FDR
GOTERM_MF_FAT	GO:0008173~RNA methyltransferase activity	5	DIMT1, CMTR1, TRMT61A, NSUN5, MEPCE	3.94677
Category	Term	Count	Genes	FDR
KEGG_PATHWAY	mmu05168:Herpes simplex infection	11	DDX58, H2-K1, IRF9, IFIT1, IFIH1, TAP2, JUN, TAP1, H2-D1, STAT1, EIF2AK2	0.0776176
KEGG_PATHWAY	mmu04612:Antigen processing and presentation	7	H2-K1, TAP2, LGMN, TAP1, H2-D1, B2M, TAPBP	0.263541
KEGG_PATHWAY	mmu00240:Pyrimidine metabolism	7	PRIM1, POLR3H, RRM2, PRIM2, DCK, POLR1B, DCTPP1	0.768734

## Sheet: spec_PROT_171
Protein names	Gene names	Student's T-test Difference KO_WT
Sulfide:quinone oxidoreductase, mitochondrial	Sqrdl	8.93576
Glutamyl aminopeptidase	Enpep	7.32337
UDP-glucuronosyltransferase 1-6;UDP-glucuronosyltransferase 1-9;UDP-glucuronosyltransferase 1-7C;UDP-glucuronosyltransferase 1-2;UDP-glucuronosyltransferase 1-1	Ugt1a6;Ugt1a6b;Ugt1a6a;Ugt1a10;Ugt1a7c;Ugt1a5;Ugt1a8;Ugt1a9;Ugt1a2;Ugt1a1	5.03797
Interferon-activable protein 205-A	Ifi205a	4.50635
Bifunctional ATP-dependent dihydroxyacetone kinase/FAD-AMP lyase (cyclizing);ATP-dependent dihydroxyacetone kinase;FAD-AMP lyase (cyclizing)	Dak	3.82724
Interleukin-1 family member 10	Il1f10	3.54506
Glypican-4;Secreted glypican-4	Gpc4	3.02122
Lipid phosphate phosphohydrolase 3	Ppap2b	2.95264
Choline transporter-like protein 2	Slc44a2	2.72219
Prolyl 3-hydroxylase 3	Leprel2;P3h3	2.67739
Protein kinase C delta-binding protein	Prkcdbp	2.64548
Alanyl-tRNA editing protein Aarsd1	Aarsd1;Gm27029	2.62311
Complement C1s-A subcomponent;Complement C1s-A subcomponent heavy chain;Complement C1s-A subcomponent light chain	C1s1;C1sa	2.42155
G-protein coupled receptor 64	Adgrg2;Gpr64	2.41175
Selenoprotein O	Selo	2.40643
Lysosomal Pro-X carboxypeptidase	Prcp	2.3743
Alpha-2-macroglobulin;Alpha-2-macroglobulin 165 kDa subunit;Alpha-2-macroglobulin 35 kDa subunit	A2m	2.34784
ER membrane protein complex subunit 4	Emc4	2.31657
1,5-anhydro-D-fructose reductase	Akr1e1;Akr1e2	2.25201
E3 ubiquitin-protein ligase Midline-1	Mid1	2.24361
Nitrilase homolog 1	Nit1	2.15902
Neudesin	Nenf	2.08977
	N6amt1	2.02464
Next to BRCA1 gene 1 protein	Nbr1	1.94056
Lymphocyte antigen 6C1;Lymphocyte antigen 6C2	Ly6c1;Ly6c2	1.92495
Hepatoma-derived growth factor-related protein 3	Hdgfrp3	1.78368
Glutaryl-CoA dehydrogenase, mitochondrial	Gcdh	1.76631
Arylsulfatase A	Arsa	1.74175
	Tsen15	1.70468
Protein LAP2	Erbb2ip	1.68618
Actin, alpha cardiac muscle 1;Actin, alpha skeletal muscle	Actc1;Acta1	1.66084
Synaptonemal complex protein SC65	Leprel4	1.63962
Complement component receptor 1-like protein	Cr1l	1.63125
Eukaryotic translation initiation factor 4 gamma 3	Eif4g3	1.59775
	Rps10	1.5438
Coxsackievirus and adenovirus receptor homolog	Cxadr	1.52005
	Tpd52l2	1.51561
Carbonic anhydrase 13	Ca13	1.4958
Zinc-binding alcohol dehydrogenase domain-containing protein 2	Zadh2	1.48914
Actin, aortic smooth muscle	Acta2;Actg2	1.47194
Amyloid beta A4 protein;N-APP;Soluble APP-alpha;Soluble APP-beta;C99;Beta-amyloid protein 42;Beta-amyloid protein 40;C83;P3(42);P3(40);C80;Gamma-secretase C-terminal fragment 59;Gamma-secretase C-terminal fragment 57;Gamma-secretase C-terminal fragment 50;C31	App	1.4586
CD99 antigen	Cd99	1.44627
Methylthioribose-1-phosphate isomerase	Mri1	1.43656
Receptor-type tyrosine-protein phosphatase S	Ptprs	1.40715
Putative N-acetylglucosamine-6-phosphate deacetylase	Amdhd2	1.39666
G-protein coupled receptor 124	Adgra2;Gpr124	1.39498
TGF-beta receptor type-2	Tgfbr2	1.36802
Paralemmin-2	Palm2;Pakap	1.36371
Heat shock 70 kDa protein 1B	Hspa1b	1.33552
Pigment epithelium-derived factor	Serpinf1	1.29033
LEM domain-containing protein 2	Lemd2	1.28702
von Willebrand factor A domain-containing protein 8	Vwa8	1.2442
Tudor domain-containing protein 3	Tdrd3	1.22685
Aspartate--tRNA ligase, mitochondrial	Dars2	1.22517
Valacyclovir hydrolase	Bphl	1.21509
Methylmalonate-semialdehyde dehydrogenase [acylating], mitochondrial	Aldh6a1	1.20148
Purine nucleoside phosphorylase	Pnp	1.17658
Acid trehalase-like protein 1	Athl1	1.13702
Protein kinase C and casein kinase substrate in neurons protein 1	Pacsin1	1.12289
Transmembrane 9 superfamily member 1	Tm9sf1	1.11489
Solute carrier family 25 member 46	Slc25a46	1.10301
Mitogen-activated protein kinase kinase kinase MLT	Zak	1.09822
ATP-dependent (S)-NAD(P)H-hydrate dehydratase	Carkd	1.0964
Antithrombin-III	Serpinc1	1.08641
Glucosamine 6-phosphate N-acetyltransferase	Gnpnat1	1.07473
Cysteine protease ATG4B	Atg4b	1.06476
Phosphatidylinositol 4,5-bisphosphate 3-kinase catalytic subunit alpha isoform	Pik3ca	1.05903
Prolyl 3-hydroxylase 1	P3h1;Lepre1	1.04576
Coiled-coil domain-containing protein 134	Ccdc134	1.04098
CTP synthase 1	Ctps1	1.03639
Rab11 family-interacting protein 5	Rab11fip5	1.01942
Kinesin-like protein KIF11	Kif11	-1.00035
Phosphorylated adapter RNA export protein	Phax	-1.01647
DNA-directed RNA polymerases I and III subunit RPAC2	Polr1d	-1.02066
Cirhin	Cirh1a	-1.02182
Calcium homeostasis endoplasmic reticulum protein	Cherp	-1.02853
Protein KTI12 homolog	Kti12	-1.02956
Protein KRI1 homolog	Kri1	-1.03205
	Bod1l	-1.04176
Cordon-bleu protein-like 1	Cobll1	-1.04293
Protein misato homolog 1	Msto1	-1.0528
Protein FAM195B	Fam195b	-1.0587
Signal-induced proliferation-associated 1-like protein 1	Sipa1l1	-1.07216
Zinc finger HIT domain-containing protein 3	Znhit3	-1.07224
Serine/threonine-protein phosphatase 4 regulatory subunit 3A	Smek1	-1.0751
DNA-directed RNA polymerase II subunit RPB4	Polr2d	-1.08347
Tyrosine--tRNA ligase, mitochondrial	Yars2	-1.08534
HEAT repeat-containing protein 5B	Heatr5b	-1.08575
Arginine and glutamate-rich protein 1	Arglu1	-1.08603
Mediator of RNA polymerase II transcription subunit 27	Med27	-1.12033
Proteasome subunit beta type-9	Psmb9	-1.12907
PCNA-associated factor	Paf	-1.14911
Protein Spindly	Spdl1	-1.1547
Lysine-specific demethylase 3A	Kdm3a	-1.15826
Probable methyltransferase-like protein 15	Mettl15	-1.163
Pumilio domain-containing protein KIAA0020	Kiaa0020	-1.17
Zinc finger protein 593	Znf593	-1.17305
Histone H3.3;Histone H3.3C;Histone H3	H3f3a;H3f3c	-1.17527
Histone deacetylase complex subunit SAP30	Sap30	-1.18644
TOX high mobility group box family member 4	Tox4	-1.213
Pleckstrin homology-like domain family B member 1	Phldb1	-1.23156
Serine/threonine-protein phosphatase 6 regulatory ankyrin repeat subunit C	Ankrd52	-1.23647
Apoptosis-enhancing nuclease	Aen	-1.24042
Beta-enolase;Enolase	Eno3	-1.25721
Xylulose kinase	Xylb	-1.25865
Melanoma-associated antigen G1	Ndnl2;1700020D05Rik	-1.26127
	Slc4a1ap	-1.27777
MORC family CW-type zinc finger protein 2A	Morc2a	-1.29574
Laminin subunit gamma-1	Lamc1	-1.33125
Decaprenyl-diphosphate synthase subunit 1	Pdss1	-1.33613
Fidgetin-like protein 1	Fignl1	-1.35583
Interferon-stimulated gene 20 kDa protein	Isg20	-1.3612
Transcription initiation factor TFIID subunit 9;Transcription initiation factor TFIID subunit 9B	Taf9;Taf9b	-1.3883
Calpain-6	Capn6	-1.39564
MICOS complex subunit Mic60	Immt	-1.39731
Nitric oxide-associated protein 1	Noa1	-1.40094
Mediator of RNA polymerase II transcription subunit 23	Med23	-1.41093
Protein diaphanous homolog 3	Diaph3;Diap3	-1.44309
Leucine-rich repeat and WD repeat-containing protein 1	LRWD1;Lrwd1	-1.45226
Cyclin-dependent kinase 7	Cdk7	-1.47823
Synaptojanin-1	Synj1	-1.4837
Probable ATP-dependent RNA helicase DDX49	Ddx49	-1.50044
S-phase kinase-associated protein 2	Skp2	-1.50057
UBX domain-containing protein 4	Ubxn4	-1.54278
Connective tissue growth factor	Ctgf	-1.55697
	Gbp10;Gbp6	-1.55772
Cyclin-A2	Ccna2	-1.56206
Receptor protein-tyrosine kinase;Hepatocyte growth factor receptor	Met	-1.568
Transforming acidic coiled-coil-containing protein 3	Tacc3	-1.61501
Monoacylglycerol lipase ABHD6	Abhd6	-1.65773
Hyaluronidase-2	Hyal2	-1.65817
Mitotic checkpoint serine/threonine-protein kinase BUB1 beta	Bub1b	-1.67734
Probable ATP-dependent RNA helicase DDX41	Ddx41	-1.6966
	Tgtp1	-1.70656
2-5-oligoadenylate synthase 1A	Oas1a;Oas1g	-1.75887
Coiled-coil-helix-coiled-coil-helix domain-containing protein 2	Chchd2;Zbed5	-1.76301
Neuroguidin	Ngdn	-1.7653
Regulation of nuclear pre-mRNA domain-containing protein 1A	Rprd1a	-1.77569
DNA-directed RNA polymerases I, II, and III subunit RPABC2	Polr2f	-1.79102
PWWP domain-containing protein MUM1	Mum1	-1.86474
Ubiquitin-conjugating enzyme E2 S	Ube2s	-1.87037
Interferon-induced very large GTPase 1	Gvin1	-1.89224
Spindle and kinetochore-associated protein 2	Ska2	-1.9054
Afadin	Mllt4	-1.90919
Histone-lysine N-methyltransferase NSD2	Whsc1	-1.9876
Interferon-induced protein with tetratricopeptide repeats 3	I830012O16Rik;Ifit3	-1.99811
Kinesin-like protein KIF20B	Kif20b	-2.02243
Tyrosyl-DNA phosphodiesterase 1	Tdp1	-2.03842
Fructose-bisphosphate aldolase C	Aldoc	-2.0422
Unconventional myosin-VI	Myo6	-2.06169
UMP-CMP kinase 2, mitochondrial	Cmpk2	-2.09
2-oxoisovalerate dehydrogenase subunit beta, mitochondrial	Bckdhb	-2.10366
Histone H2AX	H2afx	-2.25476
Non-specific serine/threonine protein kinase;Serine/threonine-protein kinase PAK 1	Pak1	-2.27535
Probable 18S rRNA (guanine-N(7))-methyltransferase	Wbscr22	-2.31991
CWF19-like protein 2	Cwf19l2	-2.45112
Huntingtin-interacting protein 1-related protein	Hip1r	-2.50921
Cytochrome c oxidase subunit 7A-related protein, mitochondrial	Cox7a2l	-2.6004
RNA-binding protein 38;RNA-binding protein 24	Rbm38;Rbm24	-2.6469
Transcription elongation factor B polypeptide 3	Tceb3	-2.75525
Negative elongation factor E	Nelfe	-2.82528
Hippocalcin-like protein 1;Neuron-specific calcium-binding protein hippocalcin	Hpcal1;Hpca	-3.1025
Protein THEM6	Them6	-3.63101
	AI607873	-4.24158
Guanylate-binding protein 4	Gbp4	-4.71068
Long-chain specific acyl-CoA dehydrogenase, mitochondrial	Acadl	-5.47297
Cellular tumor antigen p53	Trp53;Tp53	-5.89584
Serine protease inhibitor A3N	Serpina3n	-5.92835
H-2 class I histocompatibility antigen, L-D alpha chain	H2-L	-6.39006
Kelch-like protein 7	Klhl7	-7.51715
Cellular tumor antigen p53	Trp53	-8.21476

## Sheet: spec_TRANSCRIPT_6041
EnsemblGeneID	Symbol	logFC_EXP1vsCTR1	FDR_EXP1vsCTR1
ENSMUSG00000104861	3110039M20Rik	-10.339	3.94704e-142
ENSMUSG00000026535	Ifi202b	-9.744	2.13086e-76
ENSMUSG00000027833	Shox2	-9.54	1.77519e-198
ENSMUSG00000020950	Foxg1	-9.27	3.22076e-75
ENSMUSG00000020875	Hoxb9	-8.985	2.18143e-49
ENSMUSG00000020953	Coch	-8.639	2.09194e-53
ENSMUSG00000038210	Hoxa11	-8.392	8.09042e-36
ENSMUSG00000038227	Hoxa9	-8.298	6.13897e-33
ENSMUSG00000000938	Hoxa10	-8.075	4.13994e-36
ENSMUSG00000040612	Ildr2	-7.961	6.75028e-91
ENSMUSG00000032076	Cadm1	-7.793	1.88181e-26
ENSMUSG00000024530	Prelid3a	-7.769	3.65552e-25
ENSMUSG00000005917	Otx1	-7.704	3.89622e-28
ENSMUSG00000068245	Phf11d	-7.465	1.28018e-22
ENSMUSG00000052951	C130021I20Rik	-7.169	2.33454e-17
ENSMUSG00000021047	Nova1	-7.137	5.30466e-17
ENSMUSG00000000247	Lhx2	-7.067	3.98086e-17
ENSMUSG00000048938	Nr1h5	-7.034	3.35649e-18
ENSMUSG00000043639	Rbm20	-6.802	6.88817e-12
ENSMUSG00000041827	Oasl1	-6.753	9.50332e-14
ENSMUSG00000041180	Hectd2	-6.69	6.92915e-12
ENSMUSG00000027102	Hoxd8	-6.671	1.02916e-14
ENSMUSG00000038754	Elovl3	-6.641	1.41571e-15
ENSMUSG00000045180	Shroom2	-6.566	1.80016e-10
ENSMUSG00000042195	Slc35f2	-6.553	6.502e-14
ENSMUSG00000078495	Zfp984	-6.484	2.6422e-12
ENSMUSG00000046727	Cystm1	-6.42	1.1283e-11
ENSMUSG00000072964	Bhlhb9	-6.329	1.5798e-56
ENSMUSG00000038721	Hoxb7	-6.322	3.82029e-11
ENSMUSG00000018263	Tbx5	-6.295	8.66818e-11
ENSMUSG00000004872	Pax3	-6.26	9.28481e-28
ENSMUSG00000031965	Tbx20	-6.173	1.61983e-11
ENSMUSG00000028111	Ctsk	-6.136	2.37135e-10
ENSMUSG00000022805	Maats1	-6.135	1.3251e-16
ENSMUSG00000032446	Eomes	-6.131	8.81085e-11
ENSMUSG00000051166	Eml5	-6.1	1.31142e-09
ENSMUSG00000036139	Hoxc9	-6.07	8.05924e-19
ENSMUSG00000020020	Usp44	-5.975	2.6949e-08
ENSMUSG00000033685	Ucp2	-5.949	6.24032e-55
ENSMUSG00000026628	Atf3	-5.919	1.28051e-89
ENSMUSG00000056648	Hoxb8	-5.917	1.0992e-07
ENSMUSG00000038765	Lmx1b	-5.911	3.56522e-08
ENSMUSG00000089922	Gm43517	-5.91	3.32892e-09
ENSMUSG00000030827	Fgf21	-5.9	1.7921e-07
ENSMUSG00000022297	Fzd6	-5.849	9.38858e-08
ENSMUSG00000113255	AC123954.1	-5.804	1.01238e-23
ENSMUSG00000044026	Slc35g1	-5.765	1.90266e-08
ENSMUSG00000066952	Myo1h	-5.72	1.4075e-07
ENSMUSG00000069117	Gm10260	-5.682	1.92324e-33
ENSMUSG00000070867	Trabd2b	-5.678	1.52598e-18
ENSMUSG00000035916	Ptprq	-5.661	1.30191e-06
ENSMUSG00000067916	Zfp991	-5.654	4.72914e-13
ENSMUSG00000027985	Lef1	-5.593	2.65554e-07
ENSMUSG00000049235	Gm7324	-5.589	3.68916e-22
ENSMUSG00000034855	Cxcl10	-5.581	7.6704e-118
ENSMUSG00000006930	Hap1	-5.562	3.95549e-12
ENSMUSG00000043342	Hoxd9	-5.535	8.35935e-07
ENSMUSG00000029314	Gpat3	-5.483	4.00392e-12
ENSMUSG00000031886	Ces2e	-5.463	6.57289e-06
ENSMUSG00000027855	Sycp1	-5.461	1.30582e-05
ENSMUSG00000056947	Mab21l1	-5.428	5.66638e-06
ENSMUSG00000104222	Gm7292	-5.424	5.32147e-06
ENSMUSG00000028078	Dclk2	-5.418	1.08328e-09
ENSMUSG00000035504	Reep6	-5.415	2.69035e-41
ENSMUSG00000028838	Extl1	-5.411	1.23536e-06
ENSMUSG00000052371	Hoxd3os1	-5.405	1.83683e-06
ENSMUSG00000019890	Nts	-5.344	2.81349e-06
ENSMUSG00000031461	Myom2	-5.263	7.48767e-06
ENSMUSG00000038515	Grtp1	-5.209	6.48397e-15
ENSMUSG00000028972	Car6	-5.204	4.75751e-52
ENSMUSG00000032417	Rwdd2a	-5.197	8.42941e-06
ENSMUSG00000033585	Ndn	-5.191	5.65869e-06
ENSMUSG00000001661	Hoxc6	-5.188	3.83155e-05
ENSMUSG00000061461	Smim20	-5.148	2.65756e-08
ENSMUSG00000045532	C1ql1	-5.148	6.26516e-05
ENSMUSG00000038349	Plcl1	-5.119	1.18504e-05
ENSMUSG00000001655	Hoxc13	-5.113	6.95193e-06
ENSMUSG00000032690	Oas2	-5.112	3.04495e-05
ENSMUSG00000024376	Epb41l4a	-5.057	7.26345e-19
ENSMUSG00000022747	St3gal6	-5.057	9.37047e-05
ENSMUSG00000031273	Col4a6	-5.036	4.19976e-05
ENSMUSG00000020641	Rsad2	-5.027	1.31521e-84
ENSMUSG00000064267	Hvcn1	-5.011	7.58143e-05
ENSMUSG00000037921	Ddx60	-4.962	2.14643e-55
ENSMUSG00000005583	Mef2c	-4.945	4.50222e-05
ENSMUSG00000084843	B230312C02Rik	-4.945	7.77724e-05
ENSMUSG00000107879	9330102E08Rik	-4.915	0.000208576
ENSMUSG00000033036	Gm7879	-4.848	0.000137433
ENSMUSG00000098789	Jmjd7	-4.846	6.44219e-19
ENSMUSG00000048029	Eno4	-4.843	6.9729e-05
ENSMUSG00000013418	B4galnt2	-4.842	5.84398e-05
ENSMUSG00000032318	Isl2	-4.836	8.63038e-05
ENSMUSG00000053101	Gpr141	-4.831	1.08833e-08
ENSMUSG00000106981	Gm45495	-4.738	9.9189e-05
ENSMUSG00000074219	Gm10644	-4.738	0.00010712
ENSMUSG00000027510	Rbm38	-4.723	7.02006e-16
ENSMUSG00000053310	Nrgn	-4.657	7.47958e-06
ENSMUSG00000052504	Epha3	-4.628	0.000268605
ENSMUSG00000023045	Soat2	-4.566	1.66338e-05
ENSMUSG00000020788	Atp2a3	-4.561	1.18741e-08
ENSMUSG00000038402	Foxf2	-4.507	0.000517869
ENSMUSG00000025432	Avil	-4.505	1.63105e-15
ENSMUSG00000046442	Ppm1e	-4.505	0.000413291
ENSMUSG00000029456	Acad10	-4.503	0.000612425
ENSMUSG00000048078	Tenm4	-4.495	4.49259e-11
ENSMUSG00000040751	Lat2	-4.463	2.53036e-06
ENSMUSG00000051650	B3gnt2	-4.419	1.15255e-05
ENSMUSG00000030329	Pianp	-4.408	6.2867e-08
ENSMUSG00000027173	Depdc7	-4.406	8.11403e-07
ENSMUSG00000106820	D5Ertd605e	-4.378	0.000784045
ENSMUSG00000021070	Bdkrb2	-4.309	1.00579e-06
ENSMUSG00000058254	Tspan7	-4.302	4.61059e-05
ENSMUSG00000024968	Rcor2	-4.278	1.21184e-29
ENSMUSG00000038742	Angptl6	-4.276	8.10092e-75
ENSMUSG00000015354	Pcolce2	-4.247	2.59258e-18
ENSMUSG00000061048	Cdh3	-4.237	5.37919e-08
ENSMUSG00000032122	Slc37a2	-4.218	1.73726e-05
ENSMUSG00000031520	Vegfc	-4.216	1.76238e-17
ENSMUSG00000047067	Dusp28	-4.199	0.000253479
ENSMUSG00000110218	Gm20219	-4.196	0.000229357
ENSMUSG00000029648	Flt1	-4.162	1.03947e-41
ENSMUSG00000067212	H2-T23	-4.136	1.67161e-06
ENSMUSG00000015222	Map2	-4.131	5.50175e-20
ENSMUSG00000066861	Oas1g	-4.067	8.06587e-05
ENSMUSG00000050022	Amz1	-4.055	0.000148118
ENSMUSG00000038550	Ciart	-4.053	3.65686e-16
ENSMUSG00000074657	Kif5a	-4.027	8.69773e-06
ENSMUSG00000029334	Prkg2	-3.961	5.1677e-88
ENSMUSG00000032839	Trpc1	-3.914	4.28513e-13
ENSMUSG00000026435	Slc45a3	-3.885	3.92501e-05
ENSMUSG00000009596	Taf7l	-3.875	4.86826e-09
ENSMUSG00000007379	Dennd2c	-3.844	1.69633e-05
ENSMUSG00000024891	Slc29a2	-3.826	1.19316e-11
ENSMUSG00000051379	Flrt3	-3.824	2.04417e-43
ENSMUSG00000100992	Gm23925	-3.808	0.00107476
ENSMUSG00000093594	Gm20707	-3.783	2.6714e-05
ENSMUSG00000038020	Rapgefl1	-3.754	0.000470351
ENSMUSG00000050556	Kcnb1	-3.744	1.86651e-05
ENSMUSG00000024610	Cd74	-3.699	2.80783e-09
ENSMUSG00000003526	Prodh	-3.646	0.00132368
ENSMUSG00000026594	Ralgps2	-3.632	2.5573e-17
ENSMUSG00000079508	Apoo	-3.629	0.000931816
ENSMUSG00000041235	Chd7	-3.625	1.90448e-07
ENSMUSG00000020956	Dtd2	-3.613	2.41179e-07
ENSMUSG00000034825	Nrip3	-3.544	0.000467547
ENSMUSG00000052031	Tagap1	-3.538	1.81052e-11
ENSMUSG00000074570	Cass4	-3.529	7.53172e-07
ENSMUSG00000022415	Syngr1	-3.521	2.75217e-18
ENSMUSG00000001053	N4bp3	-3.514	0.00115489
ENSMUSG00000079685	Ulbp1	-3.499	2.22668e-17
ENSMUSG00000050947	Amigo1	-3.492	0.00040133
ENSMUSG00000031355	Arhgap6	-3.485	0.000499049
ENSMUSG00000028906	Epb41	-3.425	1.19076e-15
ENSMUSG00000044005	Gls2	-3.391	0.00623177
ENSMUSG00000026208	Des	-3.363	0.00206172
ENSMUSG00000073490	Ifi207	-3.352	1.07463e-11
ENSMUSG00000066113	Adamtsl1	-3.328	0.00349521
ENSMUSG00000054793	Cadm4	-3.328	0.00364066
ENSMUSG00000056899	Immp2l	-3.323	6.37267e-07
ENSMUSG00000050549	5730508B09Rik	-3.299	0.00877086
ENSMUSG00000026809	Spaca9	-3.298	0.0100744
ENSMUSG00000044216	Kcnj4	-3.296	2.12544e-11
ENSMUSG00000063873	Slc24a3	-3.288	6.70317e-114
ENSMUSG00000032262	Elovl4	-3.276	1.2115e-25
ENSMUSG00000099928	Gm29202	-3.273	0.00861677
ENSMUSG00000099655	2310034G01Rik	-3.267	0.00714078
ENSMUSG00000001281	Itgb7	-3.235	0.00596757
ENSMUSG00000097772	5430416N02Rik	-3.197	3.20008e-65
ENSMUSG00000078249	Hmga1-rs1	-3.163	0.000404637
ENSMUSG00000057054	Inca1	-3.163	0.00214793
ENSMUSG00000024948	Map4k2	-3.157	8.10997e-05
ENSMUSG00000007646	Rad51c	-3.146	4.66498e-15
ENSMUSG00000039481	Nrtn	-3.143	0.00163911
ENSMUSG00000030717	Nupr1	-3.14	5.89393e-194
ENSMUSG00000074403	Hist2h3b	-3.137	0.00565819
ENSMUSG00000068246	Apol9b	-3.123	9.44639e-42
ENSMUSG00000069874	Irgm2	-3.123	2.99597e-16
ENSMUSG00000036192	Rorb	-3.123	1.02802e-12
ENSMUSG00000036390	Gadd45a	-3.086	7.10142e-74
ENSMUSG00000040640	Erc2	-3.077	0.000187815
ENSMUSG00000005148	Klf5	-3.075	1.33655e-160
ENSMUSG00000030621	Me3	-3.072	1.4597e-05
ENSMUSG00000021285	Ppp1r13b	-3.068	5.58437e-07
ENSMUSG00000028337	Coro2a	-3.065	0.00251058
ENSMUSG00000033032	Afap1l1	-3.054	0.0103969
ENSMUSG00000072872	Rybp	-3.052	1.13352e-10
ENSMUSG00000056413	Adap1	-3.043	0.0122754
ENSMUSG00000032715	Trib3	-3.037	5.06755e-140
ENSMUSG00000074896	Ifit3	-3.029	4.46027e-17
ENSMUSG00000067455	Hist1h4j	-3.029	0.000430081
ENSMUSG00000037594	BC022687	-3.026	7.74277e-19
ENSMUSG00000059291	Rpl11	-3.023	6.56228e-305
ENSMUSG00000041132	N4bp2l1	-3.015	2.83408e-08
ENSMUSG00000039787	Cercam	-2.997	1.52428e-11
ENSMUSG00000019230	Lhx9	-2.983	0.00882943
ENSMUSG00000028351	Brinp1	-2.982	2.03508e-05
ENSMUSG00000025069	Gsto2	-2.977	0.00430303
ENSMUSG00000031292	Cdkl5	-2.975	5.63233e-05
ENSMUSG00000027387	Zc3h8	-2.967	1.03465e-28
ENSMUSG00000006720	Zfp184	-2.967	0.000290182
ENSMUSG00000029403	Cdkl2	-2.964	4.80741e-18
ENSMUSG00000020303	Stc2	-2.961	9.69117e-21
ENSMUSG00000040270	Bach2	-2.958	1.73334e-20
ENSMUSG00000025723	Nmb	-2.955	0.0086989
ENSMUSG00000037211	Spry1	-2.955	0.0124199
ENSMUSG00000044641	Pard6b	-2.954	0.0048593
ENSMUSG00000020044	Timp3	-2.952	0
ENSMUSG00000006641	Slc5a6	-2.95	0.00221938
ENSMUSG00000027831	Veph1	-2.944	0.000125916
ENSMUSG00000059554	Ccdc28a	-2.943	1.32385e-09
ENSMUSG00000029446	Psph	-2.942	3.99429e-63
ENSMUSG00000000409	Lck	-2.933	2.04103e-06
ENSMUSG00000051977	Prdm9	-2.93	2.37073e-05
ENSMUSG00000041842	Fhdc1	-2.917	3.19487e-11
ENSMUSG00000023960	Enpp5	-2.902	1.71892e-06
ENSMUSG00000027438	Napb	-2.873	1.57501e-11
ENSMUSG00000021010	Npas3	-2.864	0.00114497
ENSMUSG00000053411	Cbx7	-2.862	9.35691e-05
ENSMUSG00000103711	Tstd1	-2.861	0.0237859
ENSMUSG00000027583	Zbtb46	-2.859	0.00894168
ENSMUSG00000096768	Erdr1	-2.858	1.14328e-63
ENSMUSG00000108435	Gm45051	-2.848	0.0126757
ENSMUSG00000027536	Chmp4c	-2.847	1.78e-07
ENSMUSG00000034173	Zbed5	-2.836	2.47035e-10
ENSMUSG00000015568	Lpl	-2.805	2.73881e-92
ENSMUSG00000053730	Tmem39b	-2.797	2.50587e-10
ENSMUSG00000035929	H2-Q4	-2.79	6.108e-10
ENSMUSG00000090942	F830016B08Rik	-2.783	0.0139237
ENSMUSG00000078768	Zfp566	-2.782	4.59788e-08
ENSMUSG00000063383	Zfp947	-2.777	0.000158017
ENSMUSG00000023046	Igfbp6	-2.766	1.33717e-12
ENSMUSG00000002504	Slc9a3r2	-2.74	4.4467e-14
ENSMUSG00000028031	Dkk2	-2.739	0.0122915
ENSMUSG00000027424	Mgme1	-2.737	1.67386e-11
ENSMUSG00000026679	Enkur	-2.736	0.0129483
ENSMUSG00000054321	Taf4b	-2.733	2.26298e-15
ENSMUSG00000071454	Dtnb	-2.703	9.45871e-06
ENSMUSG00000111291	AC124577.3	-2.698	7.45299e-06
ENSMUSG00000050014	Apol10b	-2.689	0.00011163
ENSMUSG00000021143	Pacs2	-2.676	3.27869e-23
ENSMUSG00000033207	Mamdc2	-2.673	0.0442848
ENSMUSG00000040502	March9	-2.671	3.40082e-05
ENSMUSG00000035373	Ccl7	-2.665	2.41273e-71
ENSMUSG00000035164	Zc3h12c	-2.657	0.000186383
ENSMUSG00000029627	Zkscan14	-2.655	0.000705347
ENSMUSG00000030785	Cox6a2	-2.652	7.63678e-21
ENSMUSG00000011267	Zfp296	-2.649	0.0129483
ENSMUSG00000056069	Fam105a	-2.642	0.01775
ENSMUSG00000026630	Batf3	-2.637	0.000197249
ENSMUSG00000031297	Slc7a3	-2.611	3.3562e-36
ENSMUSG00000021418	Rpp40	-2.597	1.04796e-23
ENSMUSG00000113427	AC163040.2	-2.597	0.03408
ENSMUSG00000025762	Larp1b	-2.593	2.19345e-36
ENSMUSG00000102336	Gm37233	-2.589	0.0218658
ENSMUSG00000062101	Zfp119b	-2.589	0.0305428
ENSMUSG00000041920	Slc16a6	-2.586	5.34856e-08
ENSMUSG00000049122	Frmd3	-2.583	0.00025201
ENSMUSG00000069265	Hist1h3a	-2.562	0.000373973
ENSMUSG00000074873	AI606181	-2.56	5.5117e-05
ENSMUSG00000092368	A930015D03Rik	-2.546	1.68438e-07
ENSMUSG00000028683	Eif2b3	-2.539	7.67938e-63
ENSMUSG00000027956	Tmem144	-2.534	5.59476e-07
ENSMUSG00000016496	Cd274	-2.517	0.000220261
ENSMUSG00000021226	Acot2	-2.514	2.91509e-112
ENSMUSG00000097787	2700046G09Rik	-2.514	0.0241975
ENSMUSG00000079941	Gm11273	-2.511	8.34687e-21
ENSMUSG00000047787	Flrt1	-2.501	8.91979e-07
ENSMUSG00000045466	Zfp956	-2.5	1.84303e-05
ENSMUSG00000062488	Ifit3b	-2.485	1.41372e-07
ENSMUSG00000041130	Zfp598	-2.473	1.50021e-21
ENSMUSG00000028851	Nudc	-2.471	1.0893e-29
ENSMUSG00000034040	Wbscr17	-2.469	1.26826e-05
ENSMUSG00000029414	Kntc1	-2.46	1.52689e-17
ENSMUSG00000086606	Gm13205	-2.449	0.000248333
ENSMUSG00000041961	Znrf3	-2.448	2.22668e-07
ENSMUSG00000027068	Dhrs9	-2.447	1.45799e-08
ENSMUSG00000029625	Cpsf4	-2.443	2.82908e-21
ENSMUSG00000026915	Strbp	-2.44	7.14046e-61
ENSMUSG00000027313	Chac1	-2.43	5.07503e-70
ENSMUSG00000070034	Sp110	-2.429	0.0161814
ENSMUSG00000028268	Gbp3	-2.426	4.39718e-24
ENSMUSG00000029409	U90926	-2.425	1.06205e-57
ENSMUSG00000025198	Erlin1	-2.423	5.48126e-35
ENSMUSG00000035266	Helq	-2.412	1.11872e-07
ENSMUSG00000047022	Mipol1	-2.406	5.95572e-06
ENSMUSG00000037685	Atp8a1	-2.404	0.000804956
ENSMUSG00000049422	Chchd10	-2.395	8.7731e-05
ENSMUSG00000020441	2310033P09Rik	-2.392	6.49286e-53
ENSMUSG00000045071	E130308A19Rik	-2.386	1.47727e-08
ENSMUSG00000040009	Gnaz	-2.377	0.0216035
ENSMUSG00000029798	Herc6	-2.376	1.14101e-29
ENSMUSG00000036006	Ripor2	-2.376	1.08621e-14
ENSMUSG00000031489	Adrb3	-2.37	0.0354861
ENSMUSG00000027827	Kcnab1	-2.363	6.48782e-07
ENSMUSG00000038393	Txnip	-2.359	6.8759e-53
ENSMUSG00000025161	Slc16a3	-2.358	1.70012e-67
ENSMUSG00000020648	Dus4l	-2.357	5.0166e-15
ENSMUSG00000037580	Gch1	-2.355	7.33207e-11
ENSMUSG00000039512	Uhrf1bp1	-2.352	2.00597e-22
ENSMUSG00000072568	Fam84b	-2.352	1.57942e-09
ENSMUSG00000054519	Zfp867	-2.352	0.000416516
ENSMUSG00000020805	Slc13a5	-2.348	0.0463524
ENSMUSG00000022270	Retreg1	-2.345	7.32711e-22
ENSMUSG00000097754	Ptgs2os2	-2.341	2.46693e-06
ENSMUSG00000111497	Raver1	-2.332	0.00686361
ENSMUSG00000025408	Ddit3	-2.331	1.28321e-152
ENSMUSG00000069516	Lyz2	-2.328	0.00328653
ENSMUSG00000031883	Car7	-2.325	0.00983308
ENSMUSG00000024078	Ttc27	-2.315	2.0811e-15
ENSMUSG00000027353	Mcm8	-2.312	8.68202e-14
ENSMUSG00000025348	Itga7	-2.302	0.00554297
ENSMUSG00000035042	Ccl5	-2.297	3.63137e-42
ENSMUSG00000038507	Parp12	-2.292	5.35645e-21
ENSMUSG00000033762	Recql4	-2.292	6.12792e-19
ENSMUSG00000000386	Mx1	-2.291	0.0112855
ENSMUSG00000054520	Sh3bp2	-2.289	0.000694896
ENSMUSG00000034275	Igsf9b	-2.285	0.000223489
ENSMUSG00000028214	Gem	-2.284	0.00151579
ENSMUSG00000069310	Hist1h3c	-2.28	1.75969e-07
ENSMUSG00000035385	Ccl2	-2.265	8.70194e-73
ENSMUSG00000020038	Cry1	-2.261	5.37451e-14
ENSMUSG00000026198	Abcb6	-2.257	0.000177583
ENSMUSG00000021203	Otub2	-2.255	4.06565e-15
ENSMUSG00000030729	Pgm2l1	-2.253	5.349e-05
ENSMUSG00000028331	Trmo	-2.249	0.00876123
ENSMUSG00000020027	Socs2	-2.248	4.86356e-23
ENSMUSG00000032549	Rab6b	-2.245	5.94729e-06
ENSMUSG00000017943	Gdap1l1	-2.239	0.0120546
ENSMUSG00000021792	Fam213a	-2.232	5.16912e-05
ENSMUSG00000041168	Lonp1	-2.224	4.43512e-105
ENSMUSG00000029826	Zc3hav1	-2.212	1.74323e-86
ENSMUSG00000009145	Dqx1	-2.212	0.00314292
ENSMUSG00000099876	Gm29650	-2.21	2.99107e-05
ENSMUSG00000020715	Ern1	-2.21	6.51864e-05
ENSMUSG00000021266	Wars	-2.208	5.94834e-47
ENSMUSG00000024678	Ms4a4d	-2.208	4.47062e-10
ENSMUSG00000021287	Xrcc3	-2.207	0.0078498
ENSMUSG00000023883	Phf10	-2.206	8.29593e-83
ENSMUSG00000020086	H2afy2	-2.205	2.89398e-08
ENSMUSG00000060216	Arrb2	-2.198	1.22625e-31
ENSMUSG00000097055	Gm4419	-2.193	0.0166982
ENSMUSG00000038085	Cnbd2	-2.191	0.0033749
ENSMUSG00000005124	Wisp1	-2.178	2.0329e-126
ENSMUSG00000002109	Ddb2	-2.175	0.0196208
ENSMUSG00000003545	Fosb	-2.174	0.00149412
ENSMUSG00000021367	Edn1	-2.173	6.22389e-73
ENSMUSG00000040435	Ppp1r15a	-2.173	1.04975e-67
ENSMUSG00000038415	Foxq1	-2.17	0.0193613
ENSMUSG00000037736	Limch1	-2.16	5.28493e-07
ENSMUSG00000031099	Smarca1	-2.158	1.82154e-07
ENSMUSG00000053799	Exoc6	-2.142	0.00390839
ENSMUSG00000031431	Tsc22d3	-2.132	1.47488e-16
ENSMUSG00000057706	Mex3b	-2.129	5.50408e-07
ENSMUSG00000043415	Otud1	-2.123	7.64733e-08
ENSMUSG00000071350	Setdb2	-2.12	0.0162403
ENSMUSG00000018800	Abca5	-2.116	1.72839e-13
ENSMUSG00000057137	Tmem140	-2.106	4.79517e-08
ENSMUSG00000052336	Cx3cr1	-2.105	9.89886e-06
ENSMUSG00000038168	P3h2	-2.104	3.2696e-05
ENSMUSG00000025498	Irf7	-2.094	8.40833e-20
ENSMUSG00000096981	Gm16845	-2.094	0.0160866
ENSMUSG00000002550	Uck1	-2.091	1.25673e-24
ENSMUSG00000073802	Cdkn2b	-2.087	4.33676e-05
ENSMUSG00000078521	Aunip	-2.079	3.06393e-20
ENSMUSG00000028885	Smpdl3b	-2.077	5.28767e-06
ENSMUSG00000035234	Abraxas1	-2.075	9.24109e-12
ENSMUSG00000032841	Prr5l	-2.073	6.79444e-07
ENSMUSG00000072770	Acrbp	-2.068	0.0027225
ENSMUSG00000040714	Klc3	-2.062	0.000957961
ENSMUSG00000048707	Tprn	-2.062	0.00124633
ENSMUSG00000096983	2010015M23Rik	-2.055	0.00769172
ENSMUSG00000096210	H1f0	-2.053	1.25792e-166
ENSMUSG00000096965	3300005D01Rik	-2.053	1.1263e-06
ENSMUSG00000039137	Whrn	-2.047	0.031504
ENSMUSG00000073478	D730003I15Rik	-2.045	0.00177401
ENSMUSG00000022554	Hgh1	-2.04	1.78301e-16
ENSMUSG00000030400	Ercc2	-2.04	2.72168e-12
ENSMUSG00000029406	Pitpnm2	-2.039	4.56361e-06
ENSMUSG00000021786	Oxsm	-2.036	0.0122491
ENSMUSG00000032344	Mb21d1	-2.033	1.07201e-55
ENSMUSG00000021707	Dhfr	-2.032	3.69048e-50
ENSMUSG00000038593	Tctn1	-2.032	0.000732053
ENSMUSG00000060981	Hist1h4h	-2.03	0.00014856
ENSMUSG00000048895	Cdk5r1	-2.022	6.49911e-05
ENSMUSG00000079109	Pms2	-2.015	5.92293e-14
ENSMUSG00000037108	Zcwpw1	-2.015	8.27008e-10
ENSMUSG00000022353	Mtss1	-2.015	5.87122e-06
ENSMUSG00000028080	Lrba	-2.011	2.15876e-06
ENSMUSG00000054203	Ifi205	-2.01	0.0320437
ENSMUSG00000031129	Slc9a9	-2.008	0.000835056
ENSMUSG00000041268	Dmxl2	-2.008	0.0054776
ENSMUSG00000071456	1110002L01Rik	-2.007	1.44613e-07
ENSMUSG00000039910	Cited2	-2.003	1.95247e-93
ENSMUSG00000034462	Pkd2	-2.003	2.90998e-56
ENSMUSG00000029772	Ahcyl2	-1.996	7.93547e-05
ENSMUSG00000040877	Wdr25	-1.994	0.0209524
ENSMUSG00000026196	Bard1	-1.992	3.0803e-05
ENSMUSG00000078773	Rad54b	-1.99	1.8601e-10
ENSMUSG00000073436	Eme2	-1.986	0.00431153
ENSMUSG00000074220	Zfp382	-1.982	0.0350992
ENSMUSG00000097415	AU020206	-1.978	2.47696e-13
ENSMUSG00000031781	Ciapin1	-1.976	1.04039e-90
ENSMUSG00000025403	Shmt2	-1.974	3.14423e-153
ENSMUSG00000094870	Zfp131	-1.971	7.49335e-67
ENSMUSG00000024222	Fkbp5	-1.969	1.01668e-14
ENSMUSG00000038347	Tcte2	-1.961	0.0123119
ENSMUSG00000000275	Trim25	-1.959	8.19378e-42
ENSMUSG00000023980	Taf8	-1.956	0.000159703
ENSMUSG00000024764	Naa40	-1.951	7.19656e-08
ENSMUSG00000027478	Dnmt3b	-1.951	0.009305
ENSMUSG00000073427	Gm4924	-1.95	1.62969e-05
ENSMUSG00000000884	Gnb1l	-1.95	2.2124e-05
ENSMUSG00000027070	Lrp2	-1.949	0.00657282
ENSMUSG00000045896	Paip2b	-1.946	3.6191e-24
ENSMUSG00000020063	Sirt1	-1.946	2.34563e-17
ENSMUSG00000025257	Ribc1	-1.944	0.00457543
ENSMUSG00000111857	AL603745.3	-1.943	0.00102995
ENSMUSG00000058402	Zfp420	-1.941	0.000563922
ENSMUSG00000075054	Yae1d1	-1.939	3.26659e-09
ENSMUSG00000010095	Slc3a2	-1.935	1.94373e-118
ENSMUSG00000039158	Akna	-1.934	0.0292954
ENSMUSG00000028037	Ifi44	-1.932	4.14722e-53
ENSMUSG00000037126	Psd	-1.928	0.027722
ENSMUSG00000022849	Hspbap1	-1.922	9.69676e-07
ENSMUSG00000033847	Pla2g4c	-1.921	0.00983308
ENSMUSG00000022610	Mapk12	-1.92	1.49734e-11
ENSMUSG00000096954	Gdap10	-1.919	0.00552003
ENSMUSG00000097392	D930016D06Rik	-1.917	4.55737e-07
ENSMUSG00000048997	Atxn7l2	-1.916	0.000954876
ENSMUSG00000049957	Ccdc137	-1.912	2.0104e-32
ENSMUSG00000070691	Runx3	-1.911	6.97014e-36
ENSMUSG00000025272	Tro	-1.911	0.00244657
ENSMUSG00000046417	Lrrc75a	-1.909	2.64423e-08
ENSMUSG00000084883	Ccdc85c	-1.906	1.54863e-05
ENSMUSG00000087590	Epb41l4aos	-1.902	9.68014e-47
ENSMUSG00000026495	Efcab2	-1.902	0.00127459
ENSMUSG00000018899	Irf1	-1.9	1.37219e-41
ENSMUSG00000039356	Exosc2	-1.896	2.906e-15
ENSMUSG00000048007	Timm8a1	-1.895	1.50488e-05
ENSMUSG00000085255	Taco1os	-1.894	0.0396087
ENSMUSG00000035376	Hacd2	-1.892	1.24584e-12
ENSMUSG00000019854	Reps1	-1.891	3.63113e-08
ENSMUSG00000087626	Gm15050	-1.891	0.00214214
ENSMUSG00000048416	Mlf1	-1.887	2.00235e-08
ENSMUSG00000028653	Trit1	-1.886	4.88054e-06
ENSMUSG00000039145	Camk1d	-1.879	2.25397e-10
ENSMUSG00000062054	Iah1	-1.874	4.12754e-14
ENSMUSG00000087373	Gm15892	-1.873	0.0146936
ENSMUSG00000028089	Chd1l	-1.87	2.44267e-11
ENSMUSG00000028010	Gar1	-1.869	8.12415e-44
ENSMUSG00000039116	Adgrg6	-1.869	6.09834e-06
ENSMUSG00000062510	Nsl1	-1.86	0.000190694
ENSMUSG00000030347	D6Wsu163e	-1.859	8.13849e-11
ENSMUSG00000030019	Fbxl14	-1.857	0.000637678
ENSMUSG00000028920	Fbxo42	-1.856	1.78501e-07
ENSMUSG00000028850	Gpatch3	-1.856	0.0162795
ENSMUSG00000092060	Bend4	-1.852	7.30833e-05
ENSMUSG00000043279	Trim56	-1.849	3.42124e-49
ENSMUSG00000028232	Tmem68	-1.845	0.000125138
ENSMUSG00000048174	Tmem81	-1.842	0.0129314
ENSMUSG00000029036	Atad3a	-1.84	9.51894e-29
ENSMUSG00000018476	Kdm6b	-1.839	8.79791e-10
ENSMUSG00000042579	4632404H12Rik	-1.839	0.00887603
ENSMUSG00000095687	Rnaset2a	-1.838	1.57277e-30
ENSMUSG00000075012	Fjx1	-1.83	0.000236537
ENSMUSG00000011589	Fsd1	-1.828	0.000204092
ENSMUSG00000006585	Cdt1	-1.827	3.57211e-32
ENSMUSG00000028669	Pithd1	-1.827	2.71222e-18
ENSMUSG00000002825	Qtrt1	-1.826	2.15461e-19
ENSMUSG00000028680	Plk3	-1.826	3.73877e-07
ENSMUSG00000071855	Ccdc112	-1.821	1.59798e-33
ENSMUSG00000057219	Armc7	-1.819	0.0435397
ENSMUSG00000044150	A830080D01Rik	-1.818	2.91269e-11
ENSMUSG00000060550	H2-Q7	-1.818	0.0230549
ENSMUSG00000042225	Ammecr1	-1.817	8.17358e-26
ENSMUSG00000052446	Zfp961	-1.817	8.95907e-05
ENSMUSG00000020549	Elac2	-1.816	8.17399e-17
ENSMUSG00000027242	Wdr76	-1.814	2.22741e-15
ENSMUSG00000051444	Bbs12	-1.814	0.0142918
ENSMUSG00000019838	Slc16a10	-1.813	0.00146033
ENSMUSG00000041559	Fmod	-1.808	0.0430873
ENSMUSG00000039637	Coro7	-1.805	2.72343e-05
ENSMUSG00000041936	Agrn	-1.804	1.83355e-16
ENSMUSG00000027811	4930579G24Rik	-1.8	0.0405388
ENSMUSG00000021079	Timm9	-1.799	6.34185e-25
ENSMUSG00000068205	Macrod2	-1.796	0.0429598
ENSMUSG00000035370	Adat3	-1.795	0.0398706
ENSMUSG00000015702	Anxa9	-1.792	0.00482705
ENSMUSG00000055013	Agap1	-1.785	6.54841e-21
ENSMUSG00000046667	Rbm12b1	-1.784	0.0207267
ENSMUSG00000029464	Gpn3	-1.781	4.90142e-05
ENSMUSG00000041245	Wnk3	-1.781	0.0282926
ENSMUSG00000025190	Got1	-1.78	5.12674e-27
ENSMUSG00000020661	Dnmt3a	-1.78	3.4655e-15
ENSMUSG00000073599	Ecscr	-1.777	0.0468353
ENSMUSG00000028898	Trnau1ap	-1.776	1.90417e-09
ENSMUSG00000026764	Kif5c	-1.775	1.00476e-08
ENSMUSG00000055725	Paqr3	-1.775	0.000121751
ENSMUSG00000079065	BC005561	-1.771	8.86002e-36
ENSMUSG00000033386	Frrs1	-1.77	8.73972e-31
ENSMUSG00000007989	Fzd3	-1.77	1.04827e-06
ENSMUSG00000029591	Ung	-1.767	6.81478e-14
ENSMUSG00000073555	Gm4951	-1.767	0.000261638
ENSMUSG00000091898	Tnnc1	-1.767	0.0422426
ENSMUSG00000058301	Upf1	-1.764	6.12387e-48
ENSMUSG00000028744	Pqlc2	-1.759	0.000517869
ENSMUSG00000034800	Zfp661	-1.759	0.0252223
ENSMUSG00000022346	Myc	-1.758	8.13739e-14
ENSMUSG00000039347	Atp6v0e2	-1.756	0.00605223
ENSMUSG00000029486	Mrpl1	-1.755	3.29996e-17
ENSMUSG00000056427	Slit3	-1.751	0.00276414
ENSMUSG00000079057	Cyp4v3	-1.748	1.54549e-05
ENSMUSG00000034883	Lrr1	-1.746	1.4851e-05
ENSMUSG00000040282	BC052040	-1.746	2.53285e-05
ENSMUSG00000038671	Arfrp1	-1.745	3.85969e-30
ENSMUSG00000031700	Gpt2	-1.744	9.11338e-26
ENSMUSG00000014599	Csf1	-1.743	1.35984e-104
ENSMUSG00000034826	Nup54	-1.738	9.42832e-10
ENSMUSG00000040721	Zfhx2	-1.732	0.00105432
ENSMUSG00000040488	Ltbp4	-1.73	1.11959e-05
ENSMUSG00000037896	Rcor1	-1.726	4.44346e-47
ENSMUSG00000026020	Nop58	-1.725	1.12446e-171
ENSMUSG00000018537	Pcgf2	-1.721	3.69201e-10
ENSMUSG00000018143	Mafk	-1.721	4.39013e-10
ENSMUSG00000027784	Ppm1l	-1.72	2.023e-11
ENSMUSG00000021275	Tecpr2	-1.716	5.56365e-06
ENSMUSG00000027284	Cdan1	-1.712	0.00188117
ENSMUSG00000025764	Jade1	-1.711	4.38466e-33
ENSMUSG00000026718	Stam	-1.711	5.31698e-15
ENSMUSG00000049969	Plekhf2	-1.71	4.38327e-09
ENSMUSG00000038335	Tsr1	-1.703	1.13101e-34
ENSMUSG00000031202	Rab39b	-1.702	9.16107e-14
ENSMUSG00000037408	Cnnm4	-1.701	0.00536473
ENSMUSG00000019843	Fyn	-1.699	1.0461e-53
ENSMUSG00000032409	Atr	-1.698	1.33263e-12
ENSMUSG00000034854	Mfsd12	-1.695	1.36561e-05
ENSMUSG00000021013	Ttc8	-1.695	0.00044718
ENSMUSG00000100315	1700031P21Rik	-1.695	0.00115625
ENSMUSG00000026723	Trdmt1	-1.692	0.0120132
ENSMUSG00000029016	Clcn6	-1.692	0.014657
ENSMUSG00000008604	Ubqln4	-1.69	3.44924e-21
ENSMUSG00000012076	Brms1l	-1.689	2.37673e-07
ENSMUSG00000020495	Smg8	-1.688	0.000911613
ENSMUSG00000025817	Nudt5	-1.686	0.000162245
ENSMUSG00000018428	Akap1	-1.684	1.89906e-12
ENSMUSG00000026317	Cln8	-1.683	5.09567e-16
ENSMUSG00000045991	Onecut2	-1.68	0.000254032
ENSMUSG00000053553	3110082I17Rik	-1.679	1.5597e-07
ENSMUSG00000079108	Srp54b	-1.678	0.0269938
ENSMUSG00000032705	Exd2	-1.678	0.0424702
ENSMUSG00000028896	Rcc1	-1.677	5.73111e-20
ENSMUSG00000028893	Sesn2	-1.676	4.25328e-17
ENSMUSG00000048486	Fitm2	-1.675	1.28199e-05
ENSMUSG00000000811	Txnrd3	-1.673	5.76015e-14
ENSMUSG00000000028	Cdc45	-1.669	3.33267e-16
ENSMUSG00000071359	Tbpl1	-1.664	1.24192e-09
ENSMUSG00000069266	Hist1h4b	-1.659	0.00240131
ENSMUSG00000041057	Wdr43	-1.658	5.83634e-164
ENSMUSG00000025920	Stau2	-1.657	3.66282e-06
ENSMUSG00000040258	Nxph4	-1.654	0.0265839
ENSMUSG00000043061	Tmem18	-1.653	3.07022e-10
ENSMUSG00000028364	Tnc	-1.652	3.46099e-15
ENSMUSG00000020256	Aldh1l2	-1.651	1.87002e-48
ENSMUSG00000033295	Ptprf	-1.651	1.28658e-22
ENSMUSG00000059142	Zfp945	-1.65	4.82679e-11
ENSMUSG00000007080	Pole	-1.649	2.09367e-26
ENSMUSG00000024037	Wdr4	-1.648	2.53014e-13
ENSMUSG00000032609	Klhdc8b	-1.648	0.000409623
ENSMUSG00000028195	Cyr61	-1.639	1.58654e-29
ENSMUSG00000024777	Ppp2r5b	-1.637	1.32894e-11
ENSMUSG00000038279	Nop2	-1.632	1.17121e-44
ENSMUSG00000048351	Coa7	-1.628	1.42162e-15
ENSMUSG00000001120	Pcbp3	-1.628	3.76274e-09
ENSMUSG00000024442	0610009O20Rik	-1.628	4.55737e-07
ENSMUSG00000067367	Lyar	-1.627	1.15371e-67
ENSMUSG00000022833	Ccdc14	-1.627	0.00246987
ENSMUSG00000095567	Noc2l	-1.626	5.32862e-33
ENSMUSG00000049670	Morn4	-1.626	0.000405144
ENSMUSG00000024359	Hspa9	-1.624	4.33714e-198
ENSMUSG00000055305	Zfp93	-1.616	0.0346572
ENSMUSG00000022602	Arc	-1.615	0.0341724
ENSMUSG00000038816	Ctnnal1	-1.614	0.000376402
ENSMUSG00000035530	Eif1	-1.612	6.81482e-136
ENSMUSG00000061458	Nol10	-1.612	3.96818e-32
ENSMUSG00000064215	Ifi27	-1.608	9.0454e-83
ENSMUSG00000022564	Grina	-1.606	1.20875e-63
ENSMUSG00000029162	Khk	-1.606	0.00436915
ENSMUSG00000026694	Mettl13	-1.603	4.20814e-12
ENSMUSG00000026755	Arpc5l	-1.601	7.98321e-47
ENSMUSG00000034271	Jdp2	-1.601	8.08215e-38
ENSMUSG00000052533	Nup188	-1.601	1.01904e-16
ENSMUSG00000020740	Gga3	-1.601	1.04451e-09
ENSMUSG00000063888	Rpl7l1	-1.6	1.26644e-60
ENSMUSG00000036109	Mbnl3	-1.6	3.99112e-06
ENSMUSG00000044617	Zbtb39	-1.599	0.0318224
ENSMUSG00000050567	Maml1	-1.596	0.00154524
ENSMUSG00000005682	Pan2	-1.59	0.00501431
ENSMUSG00000030346	Rad51ap1	-1.586	4.59313e-37
ENSMUSG00000030528	Blm	-1.586	4.08324e-20
ENSMUSG00000027955	Fam198b	-1.583	4.42072e-15
ENSMUSG00000004319	Clcn3	-1.58	4.03011e-20
ENSMUSG00000032396	Dis3l	-1.576	6.72449e-08
ENSMUSG00000042185	Nfrkb	-1.575	1.23377e-09
ENSMUSG00000040848	Sft2d2	-1.575	9.71118e-08
ENSMUSG00000111375	Btbd8	-1.573	0.0131959
ENSMUSG00000024317	Rnf138	-1.571	6.7269e-07
ENSMUSG00000046079	Lrrc8d	-1.57	1.36282e-05
ENSMUSG00000023908	Pkmyt1	-1.568	3.04657e-21
ENSMUSG00000074682	Zcchc3	-1.565	4.71101e-21
ENSMUSG00000030060	Hmces	-1.565	3.67671e-16
ENSMUSG00000024826	Dpf2	-1.564	4.28173e-18
ENSMUSG00000038150	Ormdl3	-1.564	1.59514e-13
ENSMUSG00000027508	Pag1	-1.564	0.00148172
ENSMUSG00000031922	Cep57	-1.563	1.05344e-50
ENSMUSG00000036833	Pnpla7	-1.562	1.69265e-05
ENSMUSG00000033096	Apmap	-1.561	3.32892e-09
ENSMUSG00000033157	Abhd10	-1.557	3.25753e-06
ENSMUSG00000020561	Twistnb	-1.556	1.83818e-51
ENSMUSG00000037979	Ccdc92	-1.555	0.0210841
ENSMUSG00000029060	Mib2	-1.554	1.20137e-07
ENSMUSG00000017861	Mybl2	-1.554	4.3683e-06
ENSMUSG00000040034	Nup43	-1.553	3.85053e-11
ENSMUSG00000028568	Btf3l4	-1.553	0.00011112
ENSMUSG00000020925	Ccdc43	-1.552	4.96224e-11
ENSMUSG00000024212	Mllt1	-1.551	9.34165e-08
ENSMUSG00000037946	Fgd3	-1.551	3.51368e-06
ENSMUSG00000059674	Cdh24	-1.551	0.0110846
ENSMUSG00000037664	Cdkn1c	-1.55	3.51728e-08
ENSMUSG00000037458	Azin1	-1.548	1.31193e-56
ENSMUSG00000027220	Syt13	-1.547	1.83361e-08
ENSMUSG00000079215	Zfp664	-1.544	7.65653e-13
ENSMUSG00000062234	Gak	-1.541	3.85331e-22
ENSMUSG00000014771	Pdcd2	-1.541	2.8272e-11
ENSMUSG00000038517	Tbkbp1	-1.541	0.0111016
ENSMUSG00000022178	Ajuba	-1.54	1.20935e-20
ENSMUSG00000029578	Wipi2	-1.539	9.6715e-43
ENSMUSG00000038990	Cables2	-1.539	9.695e-05
ENSMUSG00000036067	Slc2a6	-1.538	0.00996864
ENSMUSG00000027076	Timm10	-1.536	1.84504e-24
ENSMUSG00000029003	Mad2l2	-1.536	1.24745e-07
ENSMUSG00000042202	Slc35e2	-1.534	0.0210099
ENSMUSG00000037031	Tspan15	-1.532	0.00165364
ENSMUSG00000027189	Trim44	-1.53	1.29436e-17
ENSMUSG00000018446	C1qbp	-1.529	3.39131e-58
ENSMUSG00000026974	Zmynd19	-1.529	9.9719e-18
ENSMUSG00000022673	Mcm4	-1.528	4.44477e-25
ENSMUSG00000097187	Gm19426	-1.528	0.0351446
ENSMUSG00000027342	Pcna	-1.524	1.06988e-34
ENSMUSG00000010453	Kansl3	-1.523	1.15304e-27
ENSMUSG00000002486	Tchp	-1.522	1.43264e-10
ENSMUSG00000031691	Tnpo2	-1.521	3.0925e-46
ENSMUSG00000038766	Gabpb2	-1.521	7.27865e-22
ENSMUSG00000035202	Lars2	-1.521	9.18292e-06
ENSMUSG00000027832	Ptx3	-1.516	1.11162e-77
ENSMUSG00000000561	Wdr77	-1.515	3.18569e-29
ENSMUSG00000024472	Dcp2	-1.514	3.35856e-15
ENSMUSG00000026669	Mcm10	-1.513	9.12085e-29
ENSMUSG00000035397	Klf16	-1.512	2.7108e-08
ENSMUSG00000023905	Tnfrsf12a	-1.51	3.16873e-19
ENSMUSG00000029346	Srrd	-1.509	1.62151e-06
ENSMUSG00000024983	Vti1a	-1.508	1.8712e-06
ENSMUSG00000031990	Jam3	-1.507	1.11778e-09
ENSMUSG00000041238	Rbbp8	-1.505	3.70607e-33
ENSMUSG00000086859	Snhg20	-1.505	1.85397e-18
ENSMUSG00000051235	Gen1	-1.505	1.79076e-09
ENSMUSG00000027999	Pla2g12a	-1.5	2.49645e-31
ENSMUSG00000029752	Asns	-1.499	4.06159e-58
ENSMUSG00000028542	Slc6a9	-1.499	8.63178e-28
ENSMUSG00000053641	Dennd4a	-1.498	3.18047e-09
ENSMUSG00000053398	Phgdh	-1.491	1.16709e-22
ENSMUSG00000025732	Mcrip2	-1.491	0.00714078
ENSMUSG00000073888	Ccl27a	-1.487	0.00232587
ENSMUSG00000030110	Ret	-1.487	0.0211738
ENSMUSG00000032113	Chek1	-1.485	5.02396e-16
ENSMUSG00000030057	Cnbp	-1.484	5.96109e-74
ENSMUSG00000061175	Fnip2	-1.482	1.91065e-06
ENSMUSG00000045100	Slc25a26	-1.482	0.023854
ENSMUSG00000034868	Myl12b	-1.479	3.80607e-11
ENSMUSG00000035172	Plekhh3	-1.479	0.000754386
ENSMUSG00000039737	Prkrip1	-1.477	7.58408e-23
ENSMUSG00000087497	2810001G20Rik	-1.476	0.00846267
ENSMUSG00000033396	Spg11	-1.476	0.0262638
ENSMUSG00000037904	Ankrd9	-1.475	0.0417273
ENSMUSG00000063406	Tmed5	-1.473	7.52062e-41
ENSMUSG00000033669	Zfp7	-1.473	1.10488e-05
ENSMUSG00000072694	1500011B03Rik	-1.473	0.000166896
ENSMUSG00000046994	Mars2	-1.473	0.00306912
ENSMUSG00000002983	Relb	-1.468	2.47882e-11
ENSMUSG00000002058	Unc119	-1.464	8.85662e-13
ENSMUSG00000064061	Dzip3	-1.463	1.79964e-36
ENSMUSG00000064145	Arih2	-1.463	3.85786e-19
ENSMUSG00000073374	C030034I22Rik	-1.463	0.0167908
ENSMUSG00000054079	Utp18	-1.462	5.57255e-20
ENSMUSG00000049950	Rpp38	-1.46	4.85559e-11
ENSMUSG00000001918	Slc1a5	-1.458	2.30082e-23
ENSMUSG00000028114	Mettl14	-1.457	3.71058e-15
ENSMUSG00000029714	Gigyf1	-1.455	3.56032e-09
ENSMUSG00000048355	Arxes1	-1.455	0.0248584
ENSMUSG00000071266	Zfp946	-1.454	6.10051e-05
ENSMUSG00000025086	Trub1	-1.451	1.00137e-07
ENSMUSG00000028811	Yars	-1.45	7.11981e-39
ENSMUSG00000020974	Pole2	-1.45	0.00626753
ENSMUSG00000023952	Gtpbp2	-1.448	0.000158055
ENSMUSG00000029012	Orc5	-1.447	8.65126e-07
ENSMUSG00000087574	C030037D09Rik	-1.446	0.00876123
ENSMUSG00000039763	Dnajc28	-1.446	0.0302594
ENSMUSG00000024833	Pola2	-1.444	2.84305e-07
ENSMUSG00000018848	Rars	-1.443	9.5486e-62
ENSMUSG00000017754	Pltp	-1.442	0.000109594
ENSMUSG00000022698	Naa50	-1.44	3.76714e-52
ENSMUSG00000042535	Gtpbp1	-1.44	1.86902e-42
ENSMUSG00000061207	Stk19	-1.439	1.12157e-18
ENSMUSG00000029681	Bcl7b	-1.439	5.76141e-12
ENSMUSG00000044813	Shb	-1.438	9.92967e-06
ENSMUSG00000024841	Eif1ad	-1.437	9.15302e-35
ENSMUSG00000037275	Gemin5	-1.437	1.16449e-12
ENSMUSG00000041341	Atg2b	-1.436	1.04624e-05
ENSMUSG00000085054	Gm15834	-1.436	0.00552637
ENSMUSG00000066415	Msl2	-1.435	5.33288e-11
ENSMUSG00000020664	Dld	-1.434	1.78002e-26
ENSMUSG00000027737	Slc7a11	-1.434	9.71123e-14
ENSMUSG00000050069	Grem2	-1.434	2.46485e-06
ENSMUSG00000032462	Pik3cb	-1.432	8.77811e-05
ENSMUSG00000094441	Zfp955a	-1.431	0.0209213
ENSMUSG00000025235	Bbs4	-1.43	0.000111242
ENSMUSG00000027613	Eif6	-1.429	1.27372e-74
ENSMUSG00000059482	2610301B20Rik	-1.428	7.73514e-07
ENSMUSG00000027787	Nmd3	-1.426	9.77445e-15
ENSMUSG00000038740	Mvb12b	-1.426	2.19093e-07
ENSMUSG00000029169	Dhx15	-1.425	2.89975e-60
ENSMUSG00000004069	Dnaja3	-1.425	4.05762e-07
ENSMUSG00000020647	Ncoa1	-1.422	5.04666e-05
ENSMUSG00000020911	Krt19	-1.422	0.00214881
ENSMUSG00000027799	Nbea	-1.421	2.53656e-09
ENSMUSG00000042772	Smg7	-1.42	9.25921e-45
ENSMUSG00000024732	Ccdc86	-1.42	6.13945e-19
ENSMUSG00000050705	2310061I04Rik	-1.42	1.07017e-05
ENSMUSG00000029551	Psmg3	-1.417	2.90726e-10
ENSMUSG00000028430	Nol6	-1.416	5.39077e-11
ENSMUSG00000025858	Get4	-1.414	0.00242772
ENSMUSG00000021831	Ero1l	-1.411	1.43901e-22
ENSMUSG00000038302	Afg1l	-1.411	0.00778931
ENSMUSG00000046798	Cldn12	-1.407	1.64766e-11
ENSMUSG00000059423	Zfp933	-1.407	0.00251069
ENSMUSG00000071256	Zfp213	-1.407	0.00555429
ENSMUSG00000027804	Ppid	-1.406	8.15137e-45
ENSMUSG00000020534	Shmt1	-1.405	2.05151e-16
ENSMUSG00000020694	Tlk2	-1.404	1.34573e-47
ENSMUSG00000001415	Smg5	-1.404	1.42528e-11
ENSMUSG00000025255	Zfhx4	-1.402	5.15977e-14
ENSMUSG00000027698	Nceh1	-1.402	5.98616e-09
ENSMUSG00000020432	Tcn2	-1.401	0.00411522
ENSMUSG00000029173	Sepsecs	-1.399	0.0034756
ENSMUSG00000097971	Gm26917	-1.397	5.43571e-204
ENSMUSG00000009293	Ube2g2	-1.397	2.16467e-10
ENSMUSG00000025059	Gk	-1.397	3.2711e-07
ENSMUSG00000037553	Zdhhc18	-1.395	1.83836e-07
ENSMUSG00000024613	Tcof1	-1.393	3.42441e-61
ENSMUSG00000070814	6330408A02Rik	-1.392	0.000205073
ENSMUSG00000023087	Noct	-1.391	1.36865e-09
ENSMUSG00000024270	Slc39a6	-1.39	7.63966e-41
ENSMUSG00000044763	Trmt10c	-1.389	1.29208e-07
ENSMUSG00000036636	Clcn7	-1.388	1.42855e-06
ENSMUSG00000071253	Slc25a16	-1.388	0.00959842
ENSMUSG00000032579	Hemk1	-1.387	9.22039e-05
ENSMUSG00000096916	Zfp850	-1.387	0.00550525
ENSMUSG00000058392	Rrp1b	-1.385	1.29253e-20
ENSMUSG00000020646	Mboat2	-1.384	0.0248584
ENSMUSG00000032252	Glce	-1.383	1.51625e-15
ENSMUSG00000032258	Lca5	-1.383	0.00346712
ENSMUSG00000018983	E2f2	-1.382	0.00207507
ENSMUSG00000027185	Nat10	-1.381	7.85929e-08
ENSMUSG00000024493	Lars	-1.38	2.47083e-111
ENSMUSG00000040746	Rnf167	-1.38	0.00553219
ENSMUSG00000045140	Pigw	-1.379	0.00270371
ENSMUSG00000026917	Wdr5	-1.377	5.30911e-22
ENSMUSG00000051730	Mettl5	-1.375	0.00089467
ENSMUSG00000064289	Tank	-1.374	6.5022e-10
ENSMUSG00000090290	Tarbp1	-1.374	0.047662
ENSMUSG00000033909	Usp36	-1.373	2.08985e-25
ENSMUSG00000050017	Pitpnb	-1.373	6.00599e-19
ENSMUSG00000097119	B230354K17Rik	-1.372	3.8009e-18
ENSMUSG00000035601	Trmt10b	-1.368	3.24756e-05
ENSMUSG00000044948	Cfap43	-1.367	3.51728e-08
ENSMUSG00000009563	Tor2a	-1.364	2.97778e-09
ENSMUSG00000005057	Sh2b2	-1.364	8.56324e-05
ENSMUSG00000068036	Afdn	-1.363	3.39281e-31
ENSMUSG00000035310	Lin54	-1.363	1.39466e-13
ENSMUSG00000027298	Tyro3	-1.363	1.54241e-05
ENSMUSG00000022601	Zbtb11	-1.361	3.53961e-24
ENSMUSG00000092558	Med20	-1.361	5.77196e-15
ENSMUSG00000031403	Dkc1	-1.36	4.94296e-54
ENSMUSG00000090626	Tex9	-1.36	8.98777e-15
ENSMUSG00000024132	Eci1	-1.36	8.35919e-08
ENSMUSG00000042719	Naa25	-1.357	5.17606e-44
ENSMUSG00000022960	Donson	-1.356	6.6475e-07
ENSMUSG00000016559	H3f3b	-1.355	9.82878e-46
ENSMUSG00000032035	Ets1	-1.355	1.63179e-12
ENSMUSG00000049327	Kmt5a	-1.354	4.383e-54
ENSMUSG00000022752	Tomm70a	-1.354	4.15361e-36
ENSMUSG00000020743	Mif4gd	-1.345	0.00241475
ENSMUSG00000027845	Dclre1b	-1.345	0.00859711
ENSMUSG00000060862	Zbtb40	-1.345	0.0152791
ENSMUSG00000034321	Exosc1	-1.344	1.68234e-27
ENSMUSG00000038425	Poli	-1.344	0.0416467
ENSMUSG00000034617	Mtrr	-1.341	1.16445e-10
ENSMUSG00000087598	Zfp111	-1.341	0.000108133
ENSMUSG00000036030	Prtg	-1.341	0.000283455
ENSMUSG00000054843	Atrnl1	-1.341	0.0126965
ENSMUSG00000022974	Paxbp1	-1.339	2.1197e-24
ENSMUSG00000034354	Mtmr3	-1.339	1.8937e-08
ENSMUSG00000029402	Snrnp35	-1.339	0.00669497
ENSMUSG00000056919	Cep162	-1.337	1.42863e-25
ENSMUSG00000071722	Spin4	-1.337	0.0244782
ENSMUSG00000010362	Rdm1	-1.333	8.74694e-06
ENSMUSG00000017499	Cdc6	-1.332	3.45834e-15
ENSMUSG00000044934	Zfp367	-1.332	9.12724e-09
ENSMUSG00000034203	Chchd4	-1.33	1.02971e-15
ENSMUSG00000038902	Pogz	-1.33	1.30959e-06
ENSMUSG00000056305	Usp39	-1.328	2.57314e-17
ENSMUSG00000023755	Rhebl1	-1.328	1.04799e-10
ENSMUSG00000041528	Rnf123	-1.327	0.000862763
ENSMUSG00000046675	Tmem251	-1.325	0.00188843
ENSMUSG00000031671	Setd6	-1.324	1.59165e-06
ENSMUSG00000037434	Slc30a1	-1.324	0.000600512
ENSMUSG00000029376	Mthfd2l	-1.322	0.000664362
ENSMUSG00000040033	Stat2	-1.321	1.07048e-11
ENSMUSG00000070953	Rabepk	-1.32	1.05555e-14
ENSMUSG00000020107	Anapc16	-1.316	1.23619e-18
ENSMUSG00000027227	Sord	-1.313	1.037e-21
ENSMUSG00000028651	Ppie	-1.312	0.000350498
ENSMUSG00000038485	Socs7	-1.311	1.54844e-08
ENSMUSG00000032826	Ank2	-1.31	2.01795e-12
ENSMUSG00000037926	Ssh2	-1.309	7.96195e-05
ENSMUSG00000032425	Zfp949	-1.309	0.0149293
ENSMUSG00000074797	Itpa	-1.305	1.32158e-13
ENSMUSG00000006527	Sfmbt1	-1.303	5.47659e-09
ENSMUSG00000047832	Cdca4	-1.3	1.98303e-21
ENSMUSG00000021569	Trip13	-1.299	5.14317e-23
ENSMUSG00000028020	Glrb	-1.298	0.0166538
ENSMUSG00000032526	Ss18l2	-1.297	2.65986e-06
ENSMUSG00000027678	Ncoa3	-1.297	0.000402584
ENSMUSG00000020994	Pnn	-1.296	2.81592e-36
ENSMUSG00000033434	Gtpbp6	-1.296	3.63184e-09
ENSMUSG00000029071	Dvl1	-1.296	2.96669e-07
ENSMUSG00000032040	Dcps	-1.293	2.94973e-12
ENSMUSG00000028923	Necap2	-1.293	1.45818e-09
ENSMUSG00000037007	Zfp113	-1.293	9.55485e-06
ENSMUSG00000020329	Polrmt	-1.293	0.000360048
ENSMUSG00000007207	Stx1a	-1.291	0.00913528
ENSMUSG00000026520	Pycr2	-1.288	1.00205e-34
ENSMUSG00000027641	Rbl1	-1.287	5.19901e-11
ENSMUSG00000028889	Yrdc	-1.286	3.96013e-09
ENSMUSG00000054708	Ankrd24	-1.285	6.86444e-07
ENSMUSG00000038126	Mphosph9	-1.284	3.01158e-05
ENSMUSG00000021258	Ccnk	-1.283	3.9756e-11
ENSMUSG00000034189	Hsdl1	-1.283	0.000573291
ENSMUSG00000040687	Madd	-1.283	0.0125496
ENSMUSG00000046791	Riox1	-1.281	1.26821e-09
ENSMUSG00000036825	Ssx2ip	-1.28	1.86327e-09
ENSMUSG00000043614	Vps37d	-1.28	0.043717
ENSMUSG00000029196	Tada2b	-1.277	0.00198019
ENSMUSG00000072258	Taf1a	-1.277	0.00245227
ENSMUSG00000022228	Zscan26	-1.277	0.00844179
ENSMUSG00000031337	Mtm1	-1.276	0.0352313
ENSMUSG00000017307	Acot8	-1.275	2.09027e-05
ENSMUSG00000036202	Rif1	-1.274	3.2095e-78
ENSMUSG00000022881	Rfc4	-1.274	2.6422e-12
ENSMUSG00000034453	Polr3b	-1.271	1.28798e-08
ENSMUSG00000055612	Cdca7	-1.27	5.67942e-11
ENSMUSG00000074746	Pdzd8	-1.269	9.41369e-37
ENSMUSG00000014873	Surf2	-1.269	9.60707e-07
ENSMUSG00000030921	Trim30a	-1.267	1.86951e-28
ENSMUSG00000056536	Pign	-1.267	8.62588e-11
ENSMUSG00000066278	Vps37b	-1.267	2.68189e-07
ENSMUSG00000002870	Mcm2	-1.266	1.31123e-34
ENSMUSG00000027223	Mapk8ip1	-1.264	0.000590713
ENSMUSG00000042743	Sgtb	-1.262	7.44269e-05
ENSMUSG00000020812	1810032O08Rik	-1.261	0.00350074
ENSMUSG00000010358	Ifi35	-1.26	2.5706e-08
ENSMUSG00000043384	Gprasp1	-1.259	1.1579e-06
ENSMUSG00000046879	Irgm1	-1.259	0.000116157
ENSMUSG00000032803	Cdv3	-1.258	1.60985e-59
ENSMUSG00000068206	Pick1	-1.258	0.0059848
ENSMUSG00000029484	Anxa3	-1.257	2.51691e-76
ENSMUSG00000029814	Igf2bp3	-1.257	4.77775e-15
ENSMUSG00000112278	AC163282.1	-1.257	0.026514
ENSMUSG00000004642	Slbp	-1.256	8.94157e-06
ENSMUSG00000032121	Tmem218	-1.256	0.00378668
ENSMUSG00000053293	Pom121	-1.255	4.73218e-13
ENSMUSG00000005899	Smpd4	-1.255	0.000124178
ENSMUSG00000029592	Usp30	-1.255	0.000498734
ENSMUSG00000025366	Esyt1	-1.254	5.65876e-24
ENSMUSG00000028431	Ikbkap	-1.253	2.96966e-16
ENSMUSG00000026663	Atf6	-1.251	9.86802e-13
ENSMUSG00000039883	Lrrc17	-1.25	2.56436e-54
ENSMUSG00000029034	Ints11	-1.25	6.48962e-08
ENSMUSG00000040111	Gramd1b	-1.25	0.000521823
ENSMUSG00000064264	Zfp428	-1.249	9.62767e-13
ENSMUSG00000007812	Zfp655	-1.249	1.0613e-08
ENSMUSG00000058240	Cryzl1	-1.248	2.92933e-19
ENSMUSG00000026274	Pask	-1.248	0.00418212
ENSMUSG00000022837	Iqcb1	-1.246	4.37032e-05
ENSMUSG00000047221	Fam185a	-1.245	0.00144627
ENSMUSG00000066735	Vkorc1l1	-1.242	0.0109231
ENSMUSG00000050410	Tcf19	-1.241	4.50327e-18
ENSMUSG00000056216	Cebpg	-1.24	1.64006e-15
ENSMUSG00000050043	Tmx2	-1.24	1.01184e-14
ENSMUSG00000040722	Scamp5	-1.24	0.0180102
ENSMUSG00000032119	Hinfp	-1.239	7.21992e-07
ENSMUSG00000033166	Dis3	-1.238	1.57816e-35
ENSMUSG00000038975	Rabggtb	-1.238	4.39718e-24
ENSMUSG00000054309	Cpsf3	-1.238	8.3678e-20
ENSMUSG00000029291	Rufy3	-1.238	1.42471e-05
ENSMUSG00000021236	Entpd5	-1.238	0.00309382
ENSMUSG00000032998	Foxj3	-1.236	1.86808e-08
ENSMUSG00000027194	Ttc17	-1.236	2.55904e-06
ENSMUSG00000020846	Rflnb	-1.236	1.32423e-05
ENSMUSG00000001518	Itfg2	-1.235	4.30568e-05
ENSMUSG00000025538	Sumf2	-1.235	0.000176194
ENSMUSG00000034501	Pcnx4	-1.235	0.00318402
ENSMUSG00000068739	Sars	-1.234	2.44647e-107
ENSMUSG00000039826	Trub2	-1.233	1.12324e-10
ENSMUSG00000037110	Ralgapa2	-1.233	6.20741e-05
ENSMUSG00000079179	Rab10os	-1.233	0.0426111
ENSMUSG00000038544	Inip	-1.232	1.95463e-09
ENSMUSG00000076437	Selenoh	-1.231	5.29923e-27
ENSMUSG00000067567	Hdac8	-1.231	7.0675e-05
ENSMUSG00000033773	Rpap2	-1.231	0.00123699
ENSMUSG00000029554	Mad1l1	-1.23	4.999e-06
ENSMUSG00000039345	Mettl22	-1.229	0.0107545
ENSMUSG00000037376	Trmt6	-1.228	9.37827e-18
ENSMUSG00000025050	Pcgf6	-1.227	1.86894e-05
ENSMUSG00000027905	Ddx20	-1.226	1.80761e-09
ENSMUSG00000006445	Epha2	-1.226	0.00565722
ENSMUSG00000030986	Dhx32	-1.226	0.00994713
ENSMUSG00000003518	Dusp3	-1.225	3.64086e-14
ENSMUSG00000040620	Dhx33	-1.225	2.2446e-05
ENSMUSG00000026202	Tuba4a	-1.224	1.16019e-07
ENSMUSG00000040524	Zfp609	-1.223	4.22948e-13
ENSMUSG00000028741	Mrto4	-1.222	1.75513e-20
ENSMUSG00000021838	Samd4	-1.222	2.76655e-16
ENSMUSG00000020834	Dhrs13	-1.22	1.3996e-06
ENSMUSG00000020949	Fkbp3	-1.218	3.7549e-48
ENSMUSG00000020075	Ddx21	-1.217	2.72374e-95
ENSMUSG00000028066	Pmf1	-1.214	7.64386e-34
ENSMUSG00000029440	Psmd9	-1.214	9.01486e-14
ENSMUSG00000035958	Tdp2	-1.212	0.000795024
ENSMUSG00000062980	Cped1	-1.211	0.00046139
ENSMUSG00000020023	Tmcc3	-1.211	0.00282917
ENSMUSG00000073433	Arhgdig	-1.211	0.0301116
ENSMUSG00000032103	Pus3	-1.21	1.97898e-10
ENSMUSG00000036432	Siah2	-1.21	2.16235e-05
ENSMUSG00000044950	Pwwp2a	-1.209	2.48478e-08
ENSMUSG00000019845	Tube1	-1.208	0.00317865
ENSMUSG00000055240	Zfp101	-1.204	0.00289908
ENSMUSG00000021131	Erh	-1.203	5.71457e-10
ENSMUSG00000021392	Nol8	-1.201	1.70433e-27
ENSMUSG00000057497	Fam136a	-1.201	1.96797e-05
ENSMUSG00000025076	Casp7	-1.201	0.00108627
ENSMUSG00000025264	Tsr2	-1.2	6.04949e-08
ENSMUSG00000032115	Hyou1	-1.2	3.58387e-05
ENSMUSG00000047414	Flrt2	-1.197	1.60289e-07
ENSMUSG00000024889	Rce1	-1.197	6.90224e-05
ENSMUSG00000037020	Wdr62	-1.197	0.000352114
ENSMUSG00000035208	Slfn8	-1.197	0.00136471
ENSMUSG00000027333	Smox	-1.196	0.000846733
ENSMUSG00000036533	Cdc42ep3	-1.195	1.02918e-14
ENSMUSG00000061979	Rcc1l	-1.195	9.40623e-05
ENSMUSG00000006442	Srm	-1.193	3.1054e-49
ENSMUSG00000028945	Rheb	-1.193	3.53645e-19
ENSMUSG00000090673	Gm340	-1.192	0.00144047
ENSMUSG00000028385	Snx30	-1.191	1.71468e-08
ENSMUSG00000027361	Gabpb1	-1.191	3.56967e-07
ENSMUSG00000038225	Primpol	-1.191	0.00463424
ENSMUSG00000027722	Spata5	-1.189	4.5738e-05
ENSMUSG00000026456	Cyb5r1	-1.188	1.24081e-47
ENSMUSG00000029009	Mthfr	-1.188	0.00422126
ENSMUSG00000037266	Rsrp1	-1.187	6.92628e-15
ENSMUSG00000025007	Aldh18a1	-1.187	3.4911e-11
ENSMUSG00000021906	Oxnad1	-1.187	7.45299e-06
ENSMUSG00000027620	Rbm39	-1.185	7.52502e-81
ENSMUSG00000022893	Adamts1	-1.185	3.41155e-21
ENSMUSG00000019966	Kitl	-1.185	1.54588e-15
ENSMUSG00000051329	Nup160	-1.185	2.76951e-06
ENSMUSG00000040761	Spen	-1.184	6.85043e-14
ENSMUSG00000024843	Chka	-1.183	5.6135e-12
ENSMUSG00000037622	Wdtc1	-1.182	0.000535907
ENSMUSG00000026384	Ptpn4	-1.18	0.00444615
ENSMUSG00000032497	Lrrfip2	-1.179	7.90722e-16
ENSMUSG00000025782	Taf3	-1.178	4.23574e-13
ENSMUSG00000032724	Abtb2	-1.178	0.00758601
ENSMUSG00000027942	4933434E20Rik	-1.177	3.72874e-23
ENSMUSG00000029463	Fam216a	-1.177	1.46748e-08
ENSMUSG00000063506	Arhgap22	-1.177	0.000794625
ENSMUSG00000059939	9430015G10Rik	-1.175	6.27058e-06
ENSMUSG00000028884	Rpa2	-1.174	2.37668e-36
ENSMUSG00000031976	Urb2	-1.173	0.00147211
ENSMUSG00000002963	Pnkp	-1.172	5.68865e-06
ENSMUSG00000026721	Rabgap1l	-1.171	8.54403e-06
ENSMUSG00000044702	Palb2	-1.171	0.0336134
ENSMUSG00000032012	Nectin1	-1.17	0.0362029
ENSMUSG00000025869	Nop16	-1.169	1.54794e-26
ENSMUSG00000036779	Papd5	-1.169	9.50091e-12
ENSMUSG00000033364	Usp37	-1.167	6.80122e-09
ENSMUSG00000020570	Sypl	-1.166	5.79324e-11
ENSMUSG00000000384	Tbrg4	-1.166	1.31927e-09
ENSMUSG00000036992	Nxt1	-1.165	2.02081e-06
ENSMUSG00000040521	Tsfm	-1.162	0.000177007
ENSMUSG00000046027	Stard5	-1.16	6.88146e-08
ENSMUSG00000024533	Spire1	-1.16	1.47041e-05
ENSMUSG00000005621	Zfp592	-1.16	2.5537e-05
ENSMUSG00000028882	Ppp1r8	-1.159	2.03518e-12
ENSMUSG00000017264	Exosc10	-1.158	3.98257e-16
ENSMUSG00000025785	Exosc7	-1.158	4.61832e-10
ENSMUSG00000021018	Polr2h	-1.158	0.000207174
ENSMUSG00000032415	Ube2cbp	-1.158	0.030886
ENSMUSG00000034667	Xpot	-1.156	1.70221e-17
ENSMUSG00000087141	Plcxd2	-1.156	0.0127283
ENSMUSG00000040209	Zfp704	-1.155	4.50402e-10
ENSMUSG00000026388	3110009E18Rik	-1.155	0.0257626
ENSMUSG00000030357	Fkbp4	-1.154	2.40262e-51
ENSMUSG00000015755	Tab2	-1.154	1.54762e-30
ENSMUSG00000028982	Slc25a33	-1.154	0.000438793
ENSMUSG00000028330	Ncbp1	-1.153	4.3566e-16
ENSMUSG00000057143	Trim12c	-1.153	9.38164e-07
ENSMUSG00000050107	Haspin	-1.153	0.000521823
ENSMUSG00000002603	Tgfb1	-1.152	0.0111287
ENSMUSG00000028552	Eps15	-1.15	2.94687e-08
ENSMUSG00000038705	Gmeb2	-1.149	5.8142e-05
ENSMUSG00000020185	E2f7	-1.148	2.36063e-09
ENSMUSG00000017376	Nlk	-1.147	1.89531e-06
ENSMUSG00000029147	Ppm1g	-1.144	1.5703e-29
ENSMUSG00000024999	Noc3l	-1.141	6.88171e-11
ENSMUSG00000034731	Dgkh	-1.141	1.17366e-09
ENSMUSG00000059820	AU019823	-1.139	2.31593e-15
ENSMUSG00000032314	Etfa	-1.139	3.94337e-07
ENSMUSG00000024993	Fam45a	-1.139	2.13227e-06
ENSMUSG00000006705	Pknox1	-1.138	5.91365e-10
ENSMUSG00000022074	Tnfrsf10b	-1.138	2.32443e-06
ENSMUSG00000008035	Mid1ip1	-1.137	1.81172e-06
ENSMUSG00000022704	Qtrt2	-1.137	0.000969188
ENSMUSG00000054836	Elp6	-1.137	0.0198193
ENSMUSG00000025041	Nt5c2	-1.136	3.15729e-05
ENSMUSG00000027655	Dhx35	-1.136	0.0154904
ENSMUSG00000071072	Ptges3	-1.135	6.22307e-26
ENSMUSG00000028840	Zfp593	-1.135	4.60133e-11
ENSMUSG00000009535	Rnmt	-1.134	5.16861e-10
ENSMUSG00000070733	Fryl	-1.134	0.000426513
ENSMUSG00000019362	D8Ertd738e	-1.133	6.49298e-39
ENSMUSG00000003923	Tfam	-1.133	2.41813e-15
ENSMUSG00000020691	Mettl2	-1.133	4.10826e-05
ENSMUSG00000036959	Bcorl1	-1.132	6.7692e-08
ENSMUSG00000004127	Trmt10a	-1.131	1.1133e-13
ENSMUSG00000062867	Impdh2	-1.13	4.74179e-25
ENSMUSG00000039703	Nploc4	-1.13	1.15542e-10
ENSMUSG00000046962	Zbtb21	-1.129	0.000853627
ENSMUSG00000062198	2700097O09Rik	-1.129	0.00551813
ENSMUSG00000028948	Nol9	-1.128	4.19201e-08
ENSMUSG00000020111	Micu1	-1.127	3.07797e-15
ENSMUSG00000027514	Zbp1	-1.126	0.000183129
ENSMUSG00000041225	Arhgap12	-1.125	2.88477e-10
ENSMUSG00000043872	Zmym1	-1.124	1.65101e-06
ENSMUSG00000020219	Timm13	-1.123	9.80492e-27
ENSMUSG00000020843	Timm22	-1.123	1.44055e-17
ENSMUSG00000078713	Tomm5	-1.123	0.00646066
ENSMUSG00000006678	Pola1	-1.122	9.13473e-29
ENSMUSG00000020361	Hspa4	-1.12	2.22776e-86
ENSMUSG00000031577	Tti2	-1.12	0.00586292
ENSMUSG00000043241	Upf2	-1.118	4.87029e-17
ENSMUSG00000055884	Fancm	-1.118	6.35536e-08
ENSMUSG00000028194	Ddah1	-1.117	8.26852e-15
ENSMUSG00000035765	Dym	-1.115	0.000106723
ENSMUSG00000052155	Acvr2a	-1.115	0.00428589
ENSMUSG00000049659	Aftph	-1.114	2.38861e-17
ENSMUSG00000019797	1700021F05Rik	-1.114	7.08538e-07
ENSMUSG00000021481	Zfp346	-1.114	0.000187317
ENSMUSG00000026798	Coq4	-1.114	0.00264904
ENSMUSG00000038342	Mlxip	-1.114	0.00633114
ENSMUSG00000036097	Slf2	-1.113	4.44485e-10
ENSMUSG00000031432	Prps1	-1.11	3.98896e-29
ENSMUSG00000071632	2510002D24Rik	-1.11	0.00673037
ENSMUSG00000036208	Nepro	-1.109	0.000140546
ENSMUSG00000045917	Tmem268	-1.109	0.012932
ENSMUSG00000028830	AU040320	-1.108	0.000740774
ENSMUSG00000066613	Zfp932	-1.108	0.00685051
ENSMUSG00000051674	Dcun1d4	-1.108	0.0105773
ENSMUSG00000040945	Rcc2	-1.107	1.24621e-26
ENSMUSG00000032624	Eml4	-1.106	1.43542e-12
ENSMUSG00000041153	Osgin2	-1.105	0.000418933
ENSMUSG00000018707	Dync1h1	-1.104	1.42761e-57
ENSMUSG00000040565	Btaf1	-1.104	2.23301e-16
ENSMUSG00000078970	Wdr92	-1.104	0.000791002
ENSMUSG00000047714	Ppp1r2	-1.103	8.15386e-13
ENSMUSG00000030168	Adipor2	-1.103	5.66574e-09
ENSMUSG00000080717	B230307C23Rik	-1.102	0.0050845
ENSMUSG00000075327	Zbtb2	-1.101	0.00931841
ENSMUSG00000061666	Gdpd1	-1.099	1.44883e-09
ENSMUSG00000036980	Taf6	-1.099	1.87791e-07
ENSMUSG00000110605	Gm32856	-1.099	0.0247187
ENSMUSG00000019689	Fmc1	-1.098	3.51728e-08
ENSMUSG00000025409	Mbd6	-1.097	3.25682e-05
ENSMUSG00000039929	Urb1	-1.097	0.0396234
ENSMUSG00000030224	Strap	-1.095	2.54907e-31
ENSMUSG00000010554	Mettl16	-1.094	1.0793e-28
ENSMUSG00000028461	Ccdc107	-1.094	5.50877e-09
ENSMUSG00000032840	2410131K14Rik	-1.094	0.000183067
ENSMUSG00000020741	Cluh	-1.093	1.56254e-12
ENSMUSG00000029283	Cdc7	-1.093	0.00175164
ENSMUSG00000032185	Carm1	-1.092	2.69555e-18
ENSMUSG00000020471	Pold2	-1.091	4.21374e-11
ENSMUSG00000020224	Llph	-1.09	1.00017e-10
ENSMUSG00000053560	Ier2	-1.089	1.0832e-07
ENSMUSG00000041028	Ghitm	-1.088	2.84501e-36
ENSMUSG00000018849	Wwc1	-1.088	7.292e-06
ENSMUSG00000020564	Atxn7l1	-1.088	0.000290256
ENSMUSG00000025509	Pnpla2	-1.088	0.00318869
ENSMUSG00000024949	Sf1	-1.087	1.48728e-21
ENSMUSG00000015126	Tsr3	-1.087	3.35522e-13
ENSMUSG00000041997	Tlk1	-1.085	3.60073e-12
ENSMUSG00000022471	Xrcc6	-1.085	1.148e-08
ENSMUSG00000038619	Ensa	-1.085	6.9842e-05
ENSMUSG00000022895	Ets2	-1.083	2.50307e-28
ENSMUSG00000035529	Prdm4	-1.083	0.000672067
ENSMUSG00000020923	Ubtf	-1.082	1.23504e-21
ENSMUSG00000032171	Pin1	-1.081	1.35677e-16
ENSMUSG00000071267	Zfp942	-1.081	0.000116151
ENSMUSG00000045248	Med26	-1.081	0.00265278
ENSMUSG00000022668	Gtpbp8	-1.08	0.000641196
ENSMUSG00000020528	Prpsap2	-1.08	0.00182519
ENSMUSG00000021116	Eif2s1	-1.079	6.26155e-28
ENSMUSG00000059288	Cdyl	-1.079	3.37427e-05
ENSMUSG00000056671	Prelid2	-1.078	0.000651218
ENSMUSG00000025571	Tnrc6c	-1.077	2.30125e-09
ENSMUSG00000038732	Mboat1	-1.076	0.0086989
ENSMUSG00000028322	Exosc3	-1.076	0.0464445
ENSMUSG00000027423	Snx5	-1.075	1.18353e-25
ENSMUSG00000028995	Fam126a	-1.074	2.8913e-08
ENSMUSG00000042390	Gatad2b	-1.073	5.20184e-36
ENSMUSG00000021846	Peli2	-1.073	0.000220435
ENSMUSG00000047843	Bri3	-1.073	0.000267018
ENSMUSG00000033054	Npat	-1.072	1.3405e-17
ENSMUSG00000032727	Mier3	-1.071	9.27615e-14
ENSMUSG00000042447	Mios	-1.071	0.000596069
ENSMUSG00000026942	Traf2	-1.071	0.00101047
ENSMUSG00000041859	Mcm3	-1.07	8.40738e-48
ENSMUSG00000037894	H2afz	-1.07	2.03488e-37
ENSMUSG00000040599	Mis12	-1.07	5.09579e-08
ENSMUSG00000005667	Mthfd2	-1.069	8.30349e-53
ENSMUSG00000069844	Sco1	-1.069	1.80618e-06
ENSMUSG00000029674	Limk1	-1.069	0.00688113
ENSMUSG00000029538	Srsf9	-1.065	7.78502e-25
ENSMUSG00000032352	Lrrc1	-1.065	0.00693956
ENSMUSG00000030835	Nomo1	-1.064	1.27152e-18
ENSMUSG00000006418	Rnf114	-1.064	7.42613e-06
ENSMUSG00000029066	Mrpl20	-1.063	1.46009e-17
ENSMUSG00000052423	B4galt3	-1.063	0.000110133
ENSMUSG00000037344	Slc12a9	-1.063	0.014227
ENSMUSG00000015837	Sqstm1	-1.061	4.02342e-109
ENSMUSG00000027534	Snx16	-1.061	1.01503e-09
ENSMUSG00000018372	Cep95	-1.061	8.78902e-05
ENSMUSG00000031533	Mrps31	-1.06	4.50402e-10
ENSMUSG00000072825	Cep170b	-1.06	4.32881e-08
ENSMUSG00000049553	Polr1a	-1.058	1.8371e-15
ENSMUSG00000028970	Abcb1b	-1.058	1.48686e-09
ENSMUSG00000024283	Wac	-1.057	1.13532e-19
ENSMUSG00000014245	Pigl	-1.057	0.016893
ENSMUSG00000083012	Fam220a	-1.056	0.000968058
ENSMUSG00000021254	Gpatch2l	-1.056	0.00192771
ENSMUSG00000015176	Nolc1	-1.055	2.44286e-33
ENSMUSG00000009090	Ap1b1	-1.054	9.71803e-12
ENSMUSG00000022292	Rrm2b	-1.054	0.000696716
ENSMUSG00000033257	Ttll4	-1.053	0.000722013
ENSMUSG00000023348	Trip6	-1.052	1.43439e-22
ENSMUSG00000037098	Rab11fip3	-1.052	3.57297e-07
ENSMUSG00000028901	Gmeb1	-1.051	1.6229e-06
ENSMUSG00000048720	Tbc1d12	-1.051	1.2077e-05
ENSMUSG00000001707	Eef1e1	-1.05	0.000656385
ENSMUSG00000023452	Pisd	-1.05	0.00316946
ENSMUSG00000029610	Aimp2	-1.049	9.18078e-22
ENSMUSG00000026313	Hdac4	-1.048	5.00392e-08
ENSMUSG00000043969	Emx2	-1.048	6.74238e-06
ENSMUSG00000025583	Rptor	-1.048	0.0014693
ENSMUSG00000028420	Tmem38b	-1.048	0.0445732
ENSMUSG00000041629	Fam104a	-1.047	2.69224e-36
ENSMUSG00000039770	Ypel5	-1.047	2.59611e-11
ENSMUSG00000026245	Farsb	-1.046	9.44701e-41
ENSMUSG00000054766	Set	-1.045	1.86243e-38
ENSMUSG00000032264	Zw10	-1.045	3.79981e-07
ENSMUSG00000026926	Pmpca	-1.044	2.48243e-10
ENSMUSG00000035569	Ankrd11	-1.043	8.36772e-79
ENSMUSG00000005846	Rsl1d1	-1.043	3.72226e-34
ENSMUSG00000029670	Ing3	-1.043	5.71709e-05
ENSMUSG00000071078	Nr2c2ap	-1.043	5.82472e-05
ENSMUSG00000002210	Smg9	-1.043	0.00728988
ENSMUSG00000025532	Crcp	-1.042	0.000176062
ENSMUSG00000035828	Pim3	-1.041	1.14974e-16
ENSMUSG00000030760	Acer3	-1.041	0.000365766
ENSMUSG00000044894	Uqcrq	-1.04	6.61263e-64
ENSMUSG00000027823	Gmps	-1.038	4.9315e-27
ENSMUSG00000025169	Ogfod3	-1.037	0.0160459
ENSMUSG00000025060	Slk	-1.036	1.15683e-41
ENSMUSG00000034820	Cpsf7	-1.036	1.28275e-06
ENSMUSG00000027669	Gnb4	-1.035	1.76765e-10
ENSMUSG00000042446	Zmym4	-1.035	1.00497e-07
ENSMUSG00000015942	Gtf2ird2	-1.034	0.0026485
ENSMUSG00000049882	Vcpkmt	-1.034	0.0139079
ENSMUSG00000024587	Nars	-1.032	5.47041e-106
ENSMUSG00000042605	Atxn2	-1.032	1.66964e-15
ENSMUSG00000032553	Srprb	-1.032	3.72017e-09
ENSMUSG00000020325	Fstl3	-1.031	4.22624e-14
ENSMUSG00000030747	Dgat2	-1.031	2.6259e-05
ENSMUSG00000026921	Egfl7	-1.031	0.00467144
ENSMUSG00000011158	Brf1	-1.029	0.000377968
ENSMUSG00000032370	Lactb	-1.028	5.09209e-08
ENSMUSG00000002221	Paxip1	-1.028	0.000282491
ENSMUSG00000037361	Sf3b6	-1.027	2.41074e-13
ENSMUSG00000040025	Ythdf2	-1.027	3.41375e-09
ENSMUSG00000028403	Zdhhc21	-1.027	4.29644e-09
ENSMUSG00000026933	Camsap1	-1.026	6.29641e-12
ENSMUSG00000021264	Yy1	-1.025	5.00428e-24
ENSMUSG00000006763	Saal1	-1.025	9.04395e-05
ENSMUSG00000025586	Cpeb1	-1.025	0.00239071
ENSMUSG00000037262	Kin	-1.024	2.22364e-12
ENSMUSG00000029276	Glmn	-1.024	1.4808e-05
ENSMUSG00000033813	Tcea1	-1.023	7.35557e-13
ENSMUSG00000000194	Gpr107	-1.023	8.50861e-11
ENSMUSG00000097908	4933404O12Rik	-1.023	0.00013833
ENSMUSG00000027255	Arfgap2	-1.023	0.00218165
ENSMUSG00000043140	Tmem186	-1.023	0.0159701
ENSMUSG00000005968	Tuft1	-1.022	0.0321025
ENSMUSG00000022472	Desi1	-1.02	6.96093e-16
ENSMUSG00000013662	Atad1	-1.02	6.63924e-13
ENSMUSG00000041747	Utp15	-1.02	5.24128e-09
ENSMUSG00000022945	Chaf1b	-1.018	4.59266e-11
ENSMUSG00000022369	Mtbp	-1.018	3.28715e-07
ENSMUSG00000021096	Ppm1a	-1.015	2.19717e-26
ENSMUSG00000022364	Tbc1d31	-1.015	9.23582e-08
ENSMUSG00000027035	Cers6	-1.014	1.44283e-07
ENSMUSG00000026730	Pter	-1.014	0.0315007
ENSMUSG00000047412	Zbtb44	-1.013	3.13938e-09
ENSMUSG00000024231	Cul2	-1.013	1.90949e-06
ENSMUSG00000036160	Surf6	-1.013	5.75495e-06
ENSMUSG00000020594	Pum2	-1.012	9.3897e-19
ENSMUSG00000001134	Uxt	-1.012	0.0343294
ENSMUSG00000037887	Dusp8	-1.011	8.58447e-05
ENSMUSG00000051721	Wdcp	-1.011	0.00591029
ENSMUSG00000028455	Stoml2	-1.01	4.48243e-07
ENSMUSG00000028757	Ddost	-1.009	1.02227e-16
ENSMUSG00000026142	Rhbdd1	-1.009	0.0011431
ENSMUSG00000059669	Taf1b	-1.009	0.00360764
ENSMUSG00000030615	Tmem126a	-1.008	9.13661e-19
ENSMUSG00000019710	Mrpl24	-1.008	1.22528e-09
ENSMUSG00000072980	Oip5	-1.008	6.27572e-06
ENSMUSG00000025225	Nfkb2	-1.007	2.60593e-13
ENSMUSG00000025239	Limd1	-1.006	3.67512e-12
ENSMUSG00000002718	Cse1l	-1.005	2.07704e-19
ENSMUSG00000031107	Rbmx2	-1.005	6.66813e-07
ENSMUSG00000033467	Crlf2	-1.005	7.07743e-05
ENSMUSG00000074182	Znhit6	-1.004	1.8231e-18
ENSMUSG00000007038	Neu1	-1.004	0.000337549
ENSMUSG00000022100	Xpo7	-1.003	2.57577e-13
ENSMUSG00000027829	Ccnl1	-1.001	1.08078e-29
ENSMUSG00000033285	Wdr3	-1.001	5.66415e-19
ENSMUSG00000025049	Taf5	-1	0.000101523
ENSMUSG00000027425	Kat14	-0.999	0.00726654
ENSMUSG00000022999	Lmbr1l	-0.999	0.00848612
ENSMUSG00000052926	Rnaseh2a	-0.998	1.20012e-09
ENSMUSG00000019814	Ltv1	-0.998	1.24697e-08
ENSMUSG00000047044	D030056L22Rik	-0.996	3.08248e-05
ENSMUSG00000052151	Plpp2	-0.994	6.52868e-10
ENSMUSG00000042328	Hps4	-0.994	0.000897381
ENSMUSG00000021890	Eaf1	-0.994	0.037324
ENSMUSG00000024908	Ppp6r3	-0.993	2.54507e-12
ENSMUSG00000020064	Herc4	-0.993	1.15214e-06
ENSMUSG00000028158	Mttp	-0.993	0.0381128
ENSMUSG00000054364	Rhob	-0.991	5.45082e-22
ENSMUSG00000028911	Srsf4	-0.99	0.00101708
ENSMUSG00000042063	Zfp386	-0.989	0.000281909
ENSMUSG00000020085	Aifm2	-0.989	0.00299608
ENSMUSG00000015714	Cers2	-0.988	5.347e-17
ENSMUSG00000007338	Mrpl49	-0.988	5.39968e-11
ENSMUSG00000042275	Pelo	-0.988	0.0220489
ENSMUSG00000026127	Imp4	-0.987	5.1681e-13
ENSMUSG00000063694	Cycs	-0.987	5.78171e-08
ENSMUSG00000030275	Etnk1	-0.987	5.14914e-06
ENSMUSG00000038685	Rtel1	-0.987	0.000179412
ENSMUSG00000062312	Erbb2	-0.987	0.0012076
ENSMUSG00000054484	Tmem62	-0.987	0.0413463
ENSMUSG00000021400	Wrnip1	-0.986	0.000117822
ENSMUSG00000047446	Arl4a	-0.986	0.0269972
ENSMUSG00000020537	Drg2	-0.984	2.22359e-08
ENSMUSG00000004267	Eno2	-0.984	0.000339731
ENSMUSG00000037300	Ttc13	-0.983	2.8069e-10
ENSMUSG00000031917	Nip7	-0.983	4.79074e-10
ENSMUSG00000026439	Rbbp5	-0.983	1.24324e-09
ENSMUSG00000025364	Pa2g4	-0.982	1.45755e-78
ENSMUSG00000043284	Tmem11	-0.981	5.688e-15
ENSMUSG00000039518	Cdsn	-0.98	1.92131e-11
ENSMUSG00000040688	Tbl3	-0.98	4.20512e-09
ENSMUSG00000059834	Sclt1	-0.98	1.50634e-07
ENSMUSG00000030032	Wdr54	-0.98	0.00833279
ENSMUSG00000030265	Kras	-0.979	1.04996e-36
ENSMUSG00000057858	Fam204a	-0.978	7.87696e-07
ENSMUSG00000022814	Umps	-0.977	1.53123e-12
ENSMUSG00000022724	Riox2	-0.977	0.000528525
ENSMUSG00000021140	Pcnx	-0.977	0.00311634
ENSMUSG00000020381	Mrnip	-0.977	0.0129958
ENSMUSG00000030094	Xpc	-0.977	0.013686
ENSMUSG00000020108	Ddit4	-0.976	2.18992e-19
ENSMUSG00000034621	Gpatch8	-0.975	1.85531e-13
ENSMUSG00000032469	Dbr1	-0.975	1.02116e-08
ENSMUSG00000029438	Bcl7a	-0.975	0.000988301
ENSMUSG00000001674	Ddx18	-0.974	1.60097e-09
ENSMUSG00000061024	Rrs1	-0.973	7.48841e-12
ENSMUSG00000073771	Btbd19	-0.973	0.00269499
ENSMUSG00000038240	Pdss2	-0.973	0.0447566
ENSMUSG00000005470	Asf1b	-0.97	1.194e-10
ENSMUSG00000004567	Mcoln1	-0.97	9.78675e-06
ENSMUSG00000039048	Foxred1	-0.97	0.00459516
ENSMUSG00000078676	Casc3	-0.969	4.56877e-10
ENSMUSG00000062202	Btbd9	-0.969	1.1789e-05
ENSMUSG00000026437	Cdk18	-0.968	0.039578
ENSMUSG00000051316	Taf7	-0.967	0.000112992
ENSMUSG00000015647	Lama5	-0.967	0.0230003
ENSMUSG00000035851	Ythdc1	-0.965	7.11133e-16
ENSMUSG00000024856	Cdk2ap2	-0.965	1.18741e-08
ENSMUSG00000022306	Zfpm2	-0.965	2.14964e-07
ENSMUSG00000026116	Tmem131	-0.965	0.00642529
ENSMUSG00000042709	Atpaf2	-0.965	0.010145
ENSMUSG00000024803	Ankrd1	-0.964	3.19597e-37
[truncated: 4,710 more rows]
