# Supplementary material for: Ezrin defines TSC complex activation at endosomal compartments through EGFR–AKT signaling
Source: eLife. 2025 Feb 12;13:RP98523. doi: 10.7554/eLife.98523 (PMC11820125; doi:10.7554/eLife.98523)
Supplement: Supplementary file 3. [file elife-98523-supp3.xlsx]

## Sheet: 530 common CC_FLAT
Annotation Cluster 1	Enrichment Score: 4.075134841236339
Category	Term	Count	%	PValue	Genes	List Total	Pop Hits	Pop Total	Fold Enrichment	Bonferroni	Benjamini	FDR
GOTERM_CC_FAT	GO:0045121~membrane raft	29	5.48204	6.99072e-05	ENSMUSG00000037936, ENSMUSG00000026463, ENSMUSG00000052397, ENSMUSG00000017969, ENSMUSG00000041959, ENSMUSG00000074364, ENSMUSG00000023175, ENSMUSG00000024304, ENSMUSG00000020122, ENSMUSG00000024789, ENSMUSG00000021756, ENSMUSG00000034220, ENSMUSG00000037852, ENSMUSG00000073411, ENSMUSG00000030246, ENSMUSG00000032011, ENSMUSG00000027820, ENSMUSG00000026576, ENSMUSG00000046718, ENSMUSG00000029802,…	488	437	16939	2.30348	0.0513467	0.00483929	0.00447987
GOTERM_CC_FAT	GO:0098857~membrane microdomain	29	5.48204	7.27457e-05	ENSMUSG00000037936, ENSMUSG00000026463, ENSMUSG00000052397, ENSMUSG00000017969, ENSMUSG00000041959, ENSMUSG00000074364, ENSMUSG00000023175, ENSMUSG00000024304, ENSMUSG00000020122, ENSMUSG00000024789, ENSMUSG00000021756, ENSMUSG00000034220, ENSMUSG00000037852, ENSMUSG00000073411, ENSMUSG00000030246, ENSMUSG00000032011, ENSMUSG00000027820, ENSMUSG00000026576, ENSMUSG00000046718, ENSMUSG00000029802,…	488	438	16939	2.29822	0.053375	0.00483929	0.00447987
GOTERM_CC_FAT	GO:0098589~membrane region	32	6.04915	0.000117022	ENSMUSG00000037936, ENSMUSG00000026463, ENSMUSG00000052397, ENSMUSG00000017969, ENSMUSG00000041959, ENSMUSG00000074364, ENSMUSG00000040249, ENSMUSG00000023175, ENSMUSG00000024304, ENSMUSG00000020122, ENSMUSG00000024789, ENSMUSG00000021756, ENSMUSG00000034220, ENSMUSG00000037852, ENSMUSG00000073411, ENSMUSG00000030246, ENSMUSG00000032011, ENSMUSG00000027820, ENSMUSG00000026576, ENSMUSG00000046718,…	488	522	16939	2.12788	0.0844584	0.00630245	0.00583436
Annotation Cluster 2	Enrichment Score: 3.616642453205352
Category	Term	Count	%	PValue	Genes	List Total	Pop Hits	Pop Total	Fold Enrichment	Bonferroni	Benjamini	FDR
GOTERM_CC_FAT	GO:0032040~small-subunit processome	14	2.6465	1.9461e-07	ENSMUSG00000041506, ENSMUSG00000033294, ENSMUSG00000025047, ENSMUSG00000021692, ENSMUSG00000024312, ENSMUSG00000004356, ENSMUSG00000051518, ENSMUSG00000018697, ENSMUSG00000036693, ENSMUSG00000032834, ENSMUSG00000029480, ENSMUSG00000035575, ENSMUSG00000039756, ENSMUSG00000030521	488	75	16939	6.4794	0.000146725	5.28868e-05	4.89589e-05
GOTERM_CC_FAT	GO:0030684~preribosome	17	3.21361	2.10425e-07	ENSMUSG00000004100, ENSMUSG00000058006, ENSMUSG00000041506, ENSMUSG00000033294, ENSMUSG00000025047, ENSMUSG00000021692, ENSMUSG00000024312, ENSMUSG00000004356, ENSMUSG00000051518, ENSMUSG00000024528, ENSMUSG00000018697, ENSMUSG00000036693, ENSMUSG00000032834, ENSMUSG00000029480, ENSMUSG00000035575, ENSMUSG00000039756, ENSMUSG00000030521	488	116	16939	5.08697	0.000158648	5.28868e-05	4.89589e-05
GOTERM_CC_FAT	GO:0030686~90S preribosome	7	1.32325	0.000148127	ENSMUSG00000024528, ENSMUSG00000036693, ENSMUSG00000033294, ENSMUSG00000032834, ENSMUSG00000035575, ENSMUSG00000030521, ENSMUSG00000004356	488	29	16939	8.37853	0.105684	0.00672805	0.00622836
GOTERM_CC_FAT	GO:1990904~ribonucleoprotein complex	38	7.18336	0.307432	ENSMUSG00000030681, ENSMUSG00000033294, ENSMUSG00000027951, ENSMUSG00000021692, ENSMUSG00000024423, ENSMUSG00000004356, ENSMUSG00000024528, ENSMUSG00000018697, ENSMUSG00000035692, ENSMUSG00000017548, ENSMUSG00000020409, ENSMUSG00000029480, ENSMUSG00000035575, ENSMUSG00000038722, ENSMUSG00000050335, ENSMUSG00000039756, ENSMUSG00000030521, ENSMUSG00000027580, ENSMUSG00000031586, ENSMUSG00000004100,…	488	1182	16939	1.11592	1	1	0.926959
GOTERM_CC_FAT	GO:0030529~intracellular ribonucleoprotein complex	33	6.23819	0.442734	ENSMUSG00000033294, ENSMUSG00000027951, ENSMUSG00000021692, ENSMUSG00000024423, ENSMUSG00000004356, ENSMUSG00000024528, ENSMUSG00000018697, ENSMUSG00000035692, ENSMUSG00000020409, ENSMUSG00000029480, ENSMUSG00000035575, ENSMUSG00000038722, ENSMUSG00000050335, ENSMUSG00000039756, ENSMUSG00000030521, ENSMUSG00000027580, ENSMUSG00000031586, ENSMUSG00000004100, ENSMUSG00000014907, ENSMUSG00000058006,…	488	1073	16939	1.06754	1	1	0.926959
Annotation Cluster 3	Enrichment Score: 3.589946675971224
Category	Term	Count	%	PValue	Genes	List Total	Pop Hits	Pop Total	Fold Enrichment	Bonferroni	Benjamini	FDR
GOTERM_CC_FAT	GO:0030018~Z disc	16	3.02457	2.22756e-05	ENSMUSG00000022090, ENSMUSG00000028273, ENSMUSG00000067818, ENSMUSG00000026463, ENSMUSG00000058056, ENSMUSG00000055044, ENSMUSG00000026421, ENSMUSG00000032060, ENSMUSG00000020186, ENSMUSG00000004951, ENSMUSG00000043079, ENSMUSG00000069601, ENSMUSG00000030847, ENSMUSG00000057738, ENSMUSG00000039103, ENSMUSG00000073557	488	147	16939	3.77808	0.0166557	0.00335917	0.00310968
GOTERM_CC_FAT	GO:0030017~sarcomere	20	3.78072	4.10646e-05	ENSMUSG00000022090, ENSMUSG00000031740, ENSMUSG00000032366, ENSMUSG00000028273, ENSMUSG00000067818, ENSMUSG00000048096, ENSMUSG00000026463, ENSMUSG00000028464, ENSMUSG00000058056, ENSMUSG00000055044, ENSMUSG00000026421, ENSMUSG00000032060, ENSMUSG00000020186, ENSMUSG00000004951, ENSMUSG00000043079, ENSMUSG00000069601, ENSMUSG00000030847, ENSMUSG00000057738, ENSMUSG00000039103, ENSMUSG00000073557	488	231	16939	3.00529	0.0304889	0.00483929	0.00447987
GOTERM_CC_FAT	GO:0031674~I band	16	3.02457	7.43491e-05	ENSMUSG00000022090, ENSMUSG00000028273, ENSMUSG00000067818, ENSMUSG00000026463, ENSMUSG00000058056, ENSMUSG00000055044, ENSMUSG00000026421, ENSMUSG00000032060, ENSMUSG00000020186, ENSMUSG00000004951, ENSMUSG00000043079, ENSMUSG00000069601, ENSMUSG00000030847, ENSMUSG00000057738, ENSMUSG00000039103, ENSMUSG00000073557	488	163	16939	3.40722	0.0545188	0.00483929	0.00447987
GOTERM_CC_FAT	GO:0044449~contractile fiber part	20	3.78072	7.70178e-05	ENSMUSG00000022090, ENSMUSG00000031740, ENSMUSG00000032366, ENSMUSG00000028273, ENSMUSG00000067818, ENSMUSG00000048096, ENSMUSG00000026463, ENSMUSG00000028464, ENSMUSG00000058056, ENSMUSG00000055044, ENSMUSG00000026421, ENSMUSG00000032060, ENSMUSG00000020186, ENSMUSG00000004951, ENSMUSG00000043079, ENSMUSG00000069601, ENSMUSG00000030847, ENSMUSG00000057738, ENSMUSG00000039103, ENSMUSG00000073557	488	242	16939	2.86868	0.0564196	0.00483929	0.00447987
GOTERM_CC_FAT	GO:0032432~actin filament bundle	12	2.26843	0.000116495	ENSMUSG00000022090, ENSMUSG00000043079, ENSMUSG00000032366, ENSMUSG00000028273, ENSMUSG00000067818, ENSMUSG00000030847, ENSMUSG00000055044, ENSMUSG00000058056, ENSMUSG00000032060, ENSMUSG00000033306, ENSMUSG00000022995, ENSMUSG00000025006	488	98	16939	4.25033	0.0840949	0.00630245	0.00583436
GOTERM_CC_FAT	GO:0030016~myofibril	20	3.78072	0.000138472	ENSMUSG00000022090, ENSMUSG00000031740, ENSMUSG00000032366, ENSMUSG00000028273, ENSMUSG00000067818, ENSMUSG00000048096, ENSMUSG00000026463, ENSMUSG00000028464, ENSMUSG00000058056, ENSMUSG00000055044, ENSMUSG00000026421, ENSMUSG00000032060, ENSMUSG00000020186, ENSMUSG00000004951, ENSMUSG00000043079, ENSMUSG00000069601, ENSMUSG00000030847, ENSMUSG00000057738, ENSMUSG00000039103, ENSMUSG00000073557	488	253	16939	2.74396	0.0991489	0.00672805	0.00622836
GOTERM_CC_FAT	GO:0043292~contractile fiber	20	3.78072	0.000217472	ENSMUSG00000022090, ENSMUSG00000031740, ENSMUSG00000032366, ENSMUSG00000028273, ENSMUSG00000067818, ENSMUSG00000048096, ENSMUSG00000026463, ENSMUSG00000028464, ENSMUSG00000058056, ENSMUSG00000055044, ENSMUSG00000026421, ENSMUSG00000032060, ENSMUSG00000020186, ENSMUSG00000004951, ENSMUSG00000043079, ENSMUSG00000069601, ENSMUSG00000030847, ENSMUSG00000057738, ENSMUSG00000039103, ENSMUSG00000073557	488	262	16939	2.6497	0.151251	0.00768201	0.00711146
GOTERM_CC_FAT	GO:0097517~contractile actin filament bundle	11	2.0794	0.000234332	ENSMUSG00000022090, ENSMUSG00000043079, ENSMUSG00000032366, ENSMUSG00000028273, ENSMUSG00000067818, ENSMUSG00000030847, ENSMUSG00000055044, ENSMUSG00000058056, ENSMUSG00000033306, ENSMUSG00000022995, ENSMUSG00000025006	488	89	16939	4.29013	0.161975	0.00768201	0.00711146
GOTERM_CC_FAT	GO:0001725~stress fiber	11	2.0794	0.000234332	ENSMUSG00000022090, ENSMUSG00000043079, ENSMUSG00000032366, ENSMUSG00000028273, ENSMUSG00000067818, ENSMUSG00000030847, ENSMUSG00000055044, ENSMUSG00000058056, ENSMUSG00000033306, ENSMUSG00000022995, ENSMUSG00000025006	488	89	16939	4.29013	0.161975	0.00768201	0.00711146
GOTERM_CC_FAT	GO:0099512~supramolecular fiber	51	9.64083	0.000418229	ENSMUSG00000036768, ENSMUSG00000032366, ENSMUSG00000004891, ENSMUSG00000041957, ENSMUSG00000027254, ENSMUSG00000028464, ENSMUSG00000058672, ENSMUSG00000055044, ENSMUSG00000026043, ENSMUSG00000022483, ENSMUSG00000020186, ENSMUSG00000026966, ENSMUSG00000001506, ENSMUSG00000069601, ENSMUSG00000035873, ENSMUSG00000036402, ENSMUSG00000073557, ENSMUSG00000029661, ENSMUSG00000031740, ENSMUSG00000027204,…	488	1064	16939	1.66378	0.270511	0.0112623	0.0104259
GOTERM_CC_FAT	GO:0099081~supramolecular polymer	51	9.64083	0.000501024	ENSMUSG00000036768, ENSMUSG00000032366, ENSMUSG00000004891, ENSMUSG00000041957, ENSMUSG00000027254, ENSMUSG00000028464, ENSMUSG00000058672, ENSMUSG00000055044, ENSMUSG00000026043, ENSMUSG00000022483, ENSMUSG00000020186, ENSMUSG00000026966, ENSMUSG00000001506, ENSMUSG00000069601, ENSMUSG00000035873, ENSMUSG00000036402, ENSMUSG00000073557, ENSMUSG00000029661, ENSMUSG00000031740, ENSMUSG00000027204,…	488	1072	16939	1.65137	0.314678	0.0124788	0.011552
GOTERM_CC_FAT	GO:0099080~supramolecular complex	51	9.64083	0.000509683	ENSMUSG00000036768, ENSMUSG00000032366, ENSMUSG00000004891, ENSMUSG00000041957, ENSMUSG00000027254, ENSMUSG00000028464, ENSMUSG00000058672, ENSMUSG00000055044, ENSMUSG00000026043, ENSMUSG00000022483, ENSMUSG00000020186, ENSMUSG00000026966, ENSMUSG00000001506, ENSMUSG00000069601, ENSMUSG00000035873, ENSMUSG00000036402, ENSMUSG00000073557, ENSMUSG00000029661, ENSMUSG00000031740, ENSMUSG00000027204,…	488	1073	16939	1.64983	0.31914	0.0124788	0.011552
GOTERM_CC_FAT	GO:0042641~actomyosin	11	2.0794	0.000513055	ENSMUSG00000022090, ENSMUSG00000043079, ENSMUSG00000032366, ENSMUSG00000028273, ENSMUSG00000067818, ENSMUSG00000030847, ENSMUSG00000055044, ENSMUSG00000058056, ENSMUSG00000033306, ENSMUSG00000022995, ENSMUSG00000025006	488	98	16939	3.89614	0.32087	0.0124788	0.011552
GOTERM_CC_FAT	GO:0099513~polymeric cytoskeletal fiber	31	5.86011	0.0995657	ENSMUSG00000036768, ENSMUSG00000032366, ENSMUSG00000004891, ENSMUSG00000048096, ENSMUSG00000041957, ENSMUSG00000052397, ENSMUSG00000027254, ENSMUSG00000028464, ENSMUSG00000058672, ENSMUSG00000058056, ENSMUSG00000055044, ENSMUSG00000025810, ENSMUSG00000041498, ENSMUSG00000005125, ENSMUSG00000039450, ENSMUSG00000038244, ENSMUSG00000022629, ENSMUSG00000038047, ENSMUSG00000035873, ENSMUSG00000036402,…	488	818	16939	1.31546	1	0.552004	0.511006
Annotation Cluster 4	Enrichment Score: 3.308074848631031
Category	Term	Count	%	PValue	Genes	List Total	Pop Hits	Pop Total	Fold Enrichment	Bonferroni	Benjamini	FDR
GOTERM_CC_FAT	GO:0005912~adherens junction	26	4.91493	5.39765e-05	ENSMUSG00000031673, ENSMUSG00000030782, ENSMUSG00000032026, ENSMUSG00000029552, ENSMUSG00000041957, ENSMUSG00000052397, ENSMUSG00000057440, ENSMUSG00000058056, ENSMUSG00000055044, ENSMUSG00000026786, ENSMUSG00000025810, ENSMUSG00000024304, ENSMUSG00000005125, ENSMUSG00000024789, ENSMUSG00000052698, ENSMUSG00000030403, ENSMUSG00000022090, ENSMUSG00000028273, ENSMUSG00000022091, ENSMUSG00000033060,…	488	363	16939	2.48619	0.0398823	0.00483929	0.00447987
GOTERM_CC_FAT	GO:0030054~cell junction	45	8.50662	0.00026919	ENSMUSG00000031673, ENSMUSG00000030782, ENSMUSG00000032026, ENSMUSG00000029552, ENSMUSG00000029851, ENSMUSG00000029470, ENSMUSG00000041957, ENSMUSG00000012519, ENSMUSG00000052397, ENSMUSG00000057440, ENSMUSG00000058056, ENSMUSG00000055044, ENSMUSG00000029231, ENSMUSG00000026786, ENSMUSG00000025810, ENSMUSG00000024304, ENSMUSG00000020122, ENSMUSG00000028868, ENSMUSG00000005125, ENSMUSG00000043079,…	488	882	16939	1.77097	0.183719	0.00845706	0.00782895
GOTERM_CC_FAT	GO:0005925~focal adhesion	16	3.02457	0.000766467	ENSMUSG00000030782, ENSMUSG00000032026, ENSMUSG00000029552, ENSMUSG00000022091, ENSMUSG00000052397, ENSMUSG00000058056, ENSMUSG00000026786, ENSMUSG00000025810, ENSMUSG00000022995, ENSMUSG00000025006, ENSMUSG00000024789, ENSMUSG00000018340, ENSMUSG00000052698, ENSMUSG00000039103, ENSMUSG00000030403, ENSMUSG00000033306	488	202	16939	2.74939	0.439058	0.0169975	0.0157351
GOTERM_CC_FAT	GO:0070161~anchoring junction	31	5.86011	0.000817603	ENSMUSG00000031673, ENSMUSG00000030782, ENSMUSG00000032026, ENSMUSG00000029552, ENSMUSG00000041957, ENSMUSG00000052397, ENSMUSG00000057440, ENSMUSG00000058056, ENSMUSG00000055044, ENSMUSG00000026786, ENSMUSG00000025810, ENSMUSG00000024304, ENSMUSG00000005125, ENSMUSG00000043079, ENSMUSG00000001507, ENSMUSG00000024789, ENSMUSG00000052698, ENSMUSG00000030403, ENSMUSG00000022090, ENSMUSG00000028273,…	488	559	16939	1.92494	0.460291	0.0171242	0.0158524
GOTERM_CC_FAT	GO:0005924~cell-substrate adherens junction	16	3.02457	0.00103263	ENSMUSG00000030782, ENSMUSG00000032026, ENSMUSG00000029552, ENSMUSG00000022091, ENSMUSG00000052397, ENSMUSG00000058056, ENSMUSG00000026786, ENSMUSG00000025810, ENSMUSG00000022995, ENSMUSG00000025006, ENSMUSG00000024789, ENSMUSG00000018340, ENSMUSG00000052698, ENSMUSG00000039103, ENSMUSG00000030403, ENSMUSG00000033306	488	208	16939	2.67008	0.541139	0.0210434	0.0194805
GOTERM_CC_FAT	GO:0030055~cell-substrate junction	16	3.02457	0.00150767	ENSMUSG00000030782, ENSMUSG00000032026, ENSMUSG00000029552, ENSMUSG00000022091, ENSMUSG00000052397, ENSMUSG00000058056, ENSMUSG00000026786, ENSMUSG00000025810, ENSMUSG00000022995, ENSMUSG00000025006, ENSMUSG00000024789, ENSMUSG00000018340, ENSMUSG00000052698, ENSMUSG00000039103, ENSMUSG00000030403, ENSMUSG00000033306	488	216	16939	2.57119	0.679425	0.0285071	0.0263899
Annotation Cluster 5	Enrichment Score: 3.032105744304639
Category	Term	Count	%	PValue	Genes	List Total	Pop Hits	Pop Total	Fold Enrichment	Bonferroni	Benjamini	FDR
GOTERM_CC_FAT	GO:0045177~apical part of cell	33	6.23819	0.000398903	ENSMUSG00000021190, ENSMUSG00000029470, ENSMUSG00000032561, ENSMUSG00000052397, ENSMUSG00000023030, ENSMUSG00000040249, ENSMUSG00000022146, ENSMUSG00000024304, ENSMUSG00000020122, ENSMUSG00000041313, ENSMUSG00000024620, ENSMUSG00000021477, ENSMUSG00000039450, ENSMUSG00000070047, ENSMUSG00000024866, ENSMUSG00000032849, ENSMUSG00000037706, ENSMUSG00000026193, ENSMUSG00000032011, ENSMUSG00000008540,…	488	585	16939	1.95806	0.259798	0.0111397	0.0103124
GOTERM_CC_FAT	GO:0016324~apical plasma membrane	28	5.29301	0.000574128	ENSMUSG00000052397, ENSMUSG00000023030, ENSMUSG00000022146, ENSMUSG00000024304, ENSMUSG00000020122, ENSMUSG00000041313, ENSMUSG00000024620, ENSMUSG00000021477, ENSMUSG00000039450, ENSMUSG00000070047, ENSMUSG00000024866, ENSMUSG00000032849, ENSMUSG00000037706, ENSMUSG00000026193, ENSMUSG00000032011, ENSMUSG00000024597, ENSMUSG00000026576, ENSMUSG00000046718, ENSMUSG00000029802, ENSMUSG00000027962,…	488	472	16939	2.05913	0.351451	0.0132571	0.0122725
GOTERM_CC_FAT	GO:0098590~plasma membrane region	60	11.3422	0.00349789	ENSMUSG00000032366, ENSMUSG00000037936, ENSMUSG00000017969, ENSMUSG00000074364, ENSMUSG00000023175, ENSMUSG00000024304, ENSMUSG00000028868, ENSMUSG00000025555, ENSMUSG00000024620, ENSMUSG00000041313, ENSMUSG00000021477, ENSMUSG00000001507, ENSMUSG00000070047, ENSMUSG00000024789, ENSMUSG00000069601, ENSMUSG00000024866, ENSMUSG00000047454, ENSMUSG00000032849, ENSMUSG00000037852, ENSMUSG00000031555,…	488	1438	16939	1.44831	0.928784	0.0507195	0.0469525
Annotation Cluster 6	Enrichment Score: 2.9002939200785187
Category	Term	Count	%	PValue	Genes	List Total	Pop Hits	Pop Total	Fold Enrichment	Bonferroni	Benjamini	FDR
GOTERM_CC_FAT	GO:0031012~extracellular matrix	25	4.7259	0.000160617	ENSMUSG00000026043, ENSMUSG00000022483, ENSMUSG00000001506, ENSMUSG00000000957, ENSMUSG00000021614, ENSMUSG00000024529, ENSMUSG00000034220, ENSMUSG00000068196, ENSMUSG00000090958, ENSMUSG00000017466, ENSMUSG00000050335, ENSMUSG00000005397, ENSMUSG00000029661, ENSMUSG00000029287, ENSMUSG00000031740, ENSMUSG00000032332, ENSMUSG00000026193, ENSMUSG00000022371, ENSMUSG00000027204, ENSMUSG00000003316,…	488	366	16939	2.37097	0.114068	0.00672805	0.00622836
GOTERM_CC_FAT	GO:0098643~banded collagen fibril	5	0.94518	0.000392453	ENSMUSG00000001506, ENSMUSG00000029661, ENSMUSG00000026837, ENSMUSG00000026043, ENSMUSG00000022483	488	13	16939	13.3504	0.256188	0.0111397	0.0103124
GOTERM_CC_FAT	GO:0005583~fibrillar collagen trimer	5	0.94518	0.000392453	ENSMUSG00000001506, ENSMUSG00000029661, ENSMUSG00000026837, ENSMUSG00000026043, ENSMUSG00000022483	488	13	16939	13.3504	0.256188	0.0111397	0.0103124
GOTERM_CC_FAT	GO:0005578~proteinaceous extracellular matrix	14	2.6465	0.000580219	ENSMUSG00000029661, ENSMUSG00000005397, ENSMUSG00000032332, ENSMUSG00000026193, ENSMUSG00000022371, ENSMUSG00000026043, ENSMUSG00000027204, ENSMUSG00000022483, ENSMUSG00000001435, ENSMUSG00000001506, ENSMUSG00000026837, ENSMUSG00000021614, ENSMUSG00000068196, ENSMUSG00000017466	488	156	16939	3.1151	0.354424	0.0132571	0.0122725
GOTERM_CC_FAT	GO:0005581~collagen trimer	10	1.89036	0.000805806	ENSMUSG00000001506, ENSMUSG00000029661, ENSMUSG00000026837, ENSMUSG00000032332, ENSMUSG00000022371, ENSMUSG00000024529, ENSMUSG00000026043, ENSMUSG00000022483, ENSMUSG00000068196, ENSMUSG00000001435	488	86	16939	4.03617	0.455465	0.0171242	0.0158524
GOTERM_CC_FAT	GO:0098644~complex of collagen trimers	5	0.94518	0.0027373	ENSMUSG00000001506, ENSMUSG00000029661, ENSMUSG00000026837, ENSMUSG00000026043, ENSMUSG00000022483	488	21	16939	8.26454	0.873404	0.0421208	0.0389925
GOTERM_CC_FAT	GO:0044420~extracellular matrix component	13	2.45747	0.00296566	ENSMUSG00000029661, ENSMUSG00000005397, ENSMUSG00000032332, ENSMUSG00000026193, ENSMUSG00000026043, ENSMUSG00000027204, ENSMUSG00000022483, ENSMUSG00000001435, ENSMUSG00000001506, ENSMUSG00000026837, ENSMUSG00000021614, ENSMUSG00000068196, ENSMUSG00000017466	488	165	16939	2.73481	0.893481	0.0447221	0.0414006
GOTERM_CC_FAT	GO:0005604~basement membrane	8	1.51229	0.0668373	ENSMUSG00000005397, ENSMUSG00000026837, ENSMUSG00000026193, ENSMUSG00000027204, ENSMUSG00000022483, ENSMUSG00000068196, ENSMUSG00000001435, ENSMUSG00000017466	488	124	16939	2.23942	1	0.430729	0.398739
Annotation Cluster 7	Enrichment Score: 2.513977145060711
Category	Term	Count	%	PValue	Genes	List Total	Pop Hits	Pop Total	Fold Enrichment	Bonferroni	Benjamini	FDR
GOTERM_CC_FAT	GO:0043656~intracellular region of host	4	0.756144	0.00174319	ENSMUSG00000029298, ENSMUSG00000040253, ENSMUSG00000054072, ENSMUSG00000028270	488	9	16939	15.4271	0.731663	0.0285732	0.026451
GOTERM_CC_FAT	GO:0033646~host intracellular part	4	0.756144	0.00174319	ENSMUSG00000029298, ENSMUSG00000040253, ENSMUSG00000054072, ENSMUSG00000028270	488	9	16939	15.4271	0.731663	0.0285732	0.026451
GOTERM_CC_FAT	GO:0033655~host cell cytoplasm part	4	0.756144	0.00174319	ENSMUSG00000029298, ENSMUSG00000040253, ENSMUSG00000054072, ENSMUSG00000028270	488	9	16939	15.4271	0.731663	0.0285732	0.026451
GOTERM_CC_FAT	GO:0030430~host cell cytoplasm	4	0.756144	0.00174319	ENSMUSG00000029298, ENSMUSG00000040253, ENSMUSG00000054072, ENSMUSG00000028270	488	9	16939	15.4271	0.731663	0.0285732	0.026451
GOTERM_CC_FAT	GO:0020003~symbiont-containing vacuole	4	0.756144	0.00174319	ENSMUSG00000029298, ENSMUSG00000040253, ENSMUSG00000054072, ENSMUSG00000028270	488	9	16939	15.4271	0.731663	0.0285732	0.026451
GOTERM_CC_FAT	GO:0020005~symbiont-containing vacuole membrane	4	0.756144	0.00174319	ENSMUSG00000029298, ENSMUSG00000040253, ENSMUSG00000054072, ENSMUSG00000028270	488	9	16939	15.4271	0.731663	0.0285732	0.026451
GOTERM_CC_FAT	GO:0033643~host cell part	4	0.756144	0.00243735	ENSMUSG00000029298, ENSMUSG00000040253, ENSMUSG00000054072, ENSMUSG00000028270	488	10	16939	13.8844	0.841184	0.0382868	0.0354432
GOTERM_CC_FAT	GO:0065010~extracellular membrane-bounded organelle	4	0.756144	0.00328025	ENSMUSG00000029298, ENSMUSG00000040253, ENSMUSG00000054072, ENSMUSG00000028270	488	11	16939	12.6222	0.916037	0.0484963	0.0448944
GOTERM_CC_FAT	GO:0043657~host cell	4	0.756144	0.00544757	ENSMUSG00000029298, ENSMUSG00000040253, ENSMUSG00000054072, ENSMUSG00000028270	488	13	16939	10.6803	0.983734	0.0720608	0.0667088
GOTERM_CC_FAT	GO:0018995~host	4	0.756144	0.00544757	ENSMUSG00000029298, ENSMUSG00000040253, ENSMUSG00000054072, ENSMUSG00000028270	488	13	16939	10.6803	0.983734	0.0720608	0.0667088
GOTERM_CC_FAT	GO:0044215~other organism	4	0.756144	0.00678681	ENSMUSG00000029298, ENSMUSG00000040253, ENSMUSG00000054072, ENSMUSG00000028270	488	14	16939	9.91745	0.994111	0.0831837	0.0770056
GOTERM_CC_FAT	GO:0044216~other organism cell	4	0.756144	0.00678681	ENSMUSG00000029298, ENSMUSG00000040253, ENSMUSG00000054072, ENSMUSG00000028270	488	14	16939	9.91745	0.994111	0.0831837	0.0770056
GOTERM_CC_FAT	GO:0044217~other organism part	4	0.756144	0.00678681	ENSMUSG00000029298, ENSMUSG00000040253, ENSMUSG00000054072, ENSMUSG00000028270	488	14	16939	9.91745	0.994111	0.0831837	0.0770056
Annotation Cluster 8	Enrichment Score: 2.2210187882783035
Category	Term	Count	%	PValue	Genes	List Total	Pop Hits	Pop Total	Fold Enrichment	Bonferroni	Benjamini	FDR
GOTERM_CC_FAT	GO:0098552~side of membrane	44	8.31758	0.00414	ENSMUSG00000026980, ENSMUSG00000052397, ENSMUSG00000029231, ENSMUSG00000040249, ENSMUSG00000007888, ENSMUSG00000022146, ENSMUSG00000000594, ENSMUSG00000025555, ENSMUSG00000021477, ENSMUSG00000026249, ENSMUSG00000022103, ENSMUSG00000042364, ENSMUSG00000001507, ENSMUSG00000024789, ENSMUSG00000021756, ENSMUSG00000047454, ENSMUSG00000032849, ENSMUSG00000073411, ENSMUSG00000036402, ENSMUSG00000050335,…	488	985	16939	1.55055	0.956196	0.0586994	0.0543397
GOTERM_CC_FAT	GO:0009897~external side of plasma membrane	35	6.61626	0.00574964	ENSMUSG00000026980, ENSMUSG00000029231, ENSMUSG00000040249, ENSMUSG00000007888, ENSMUSG00000022146, ENSMUSG00000021477, ENSMUSG00000026249, ENSMUSG00000022103, ENSMUSG00000001507, ENSMUSG00000021756, ENSMUSG00000032849, ENSMUSG00000073411, ENSMUSG00000050335, ENSMUSG00000031555, ENSMUSG00000029287, ENSMUSG00000032135, ENSMUSG00000060802, ENSMUSG00000033420, ENSMUSG00000032011, ENSMUSG00000041926,…	488	749	16939	1.62201	0.987064	0.0747453	0.0691939
GOTERM_CC_FAT	GO:0009986~cell surface	56	10.586	0.00912647	ENSMUSG00000037936, ENSMUSG00000041959, ENSMUSG00000029231, ENSMUSG00000007888, ENSMUSG00000024304, ENSMUSG00000024620, ENSMUSG00000021477, ENSMUSG00000026249, ENSMUSG00000001507, ENSMUSG00000069601, ENSMUSG00000021756, ENSMUSG00000032849, ENSMUSG00000034220, ENSMUSG00000031555, ENSMUSG00000060802, ENSMUSG00000046718, ENSMUSG00000027962, ENSMUSG00000022797, ENSMUSG00000024659, ENSMUSG00000022636,…	488	1386	16939	1.40247	0.999005	0.105867	0.0980042
Annotation Cluster 9	Enrichment Score: 1.9690379360794759
Category	Term	Count	%	PValue	Genes	List Total	Pop Hits	Pop Total	Fold Enrichment	Bonferroni	Benjamini	FDR
GOTERM_CC_FAT	GO:0031252~cell leading edge	27	5.10397	0.00131132	ENSMUSG00000032366, ENSMUSG00000052397, ENSMUSG00000028266, ENSMUSG00000058056, ENSMUSG00000026786, ENSMUSG00000024304, ENSMUSG00000020122, ENSMUSG00000028868, ENSMUSG00000024620, ENSMUSG00000070047, ENSMUSG00000052698, ENSMUSG00000030403, ENSMUSG00000032702, ENSMUSG00000019889, ENSMUSG00000033420, ENSMUSG00000032011, ENSMUSG00000059430, ENSMUSG00000022995, ENSMUSG00000062380, ENSMUSG00000039043,…	488	474	16939	1.97721	0.628194	0.0260193	0.0240868
GOTERM_CC_FAT	GO:0031256~leading edge membrane	12	2.26843	0.025703	ENSMUSG00000032366, ENSMUSG00000040296, ENSMUSG00000033420, ENSMUSG00000032011, ENSMUSG00000052397, ENSMUSG00000030403, ENSMUSG00000032702, ENSMUSG00000032911, ENSMUSG00000020122, ENSMUSG00000019889, ENSMUSG00000031007, ENSMUSG00000017314	488	195	16939	2.13607	1	0.233495	0.216153
GOTERM_CC_FAT	GO:0031253~cell projection membrane	19	3.59168	0.0367447	ENSMUSG00000032366, ENSMUSG00000033420, ENSMUSG00000037936, ENSMUSG00000032011, ENSMUSG00000052397, ENSMUSG00000023030, ENSMUSG00000029802, ENSMUSG00000020122, ENSMUSG00000047547, ENSMUSG00000001507, ENSMUSG00000040296, ENSMUSG00000039062, ENSMUSG00000020733, ENSMUSG00000029070, ENSMUSG00000030403, ENSMUSG00000032702, ENSMUSG00000032911, ENSMUSG00000031007, ENSMUSG00000017314	488	394	16939	1.67388	1	0.297908	0.275783
Annotation Cluster 10	Enrichment Score: 1.6433784913909746
Category	Term	Count	%	PValue	Genes	List Total	Pop Hits	Pop Total	Fold Enrichment	Bonferroni	Benjamini	FDR
GOTERM_CC_FAT	GO:0043230~extracellular organelle	12	2.26843	0.00180227	ENSMUSG00000042364, ENSMUSG00000024659, ENSMUSG00000046733, ENSMUSG00000029298, ENSMUSG00000039062, ENSMUSG00000037706, ENSMUSG00000040253, ENSMUSG00000026193, ENSMUSG00000023030, ENSMUSG00000054072, ENSMUSG00000028270, ENSMUSG00000022797	488	135	16939	3.08543	0.743375	0.028913	0.0267656
GOTERM_CC_FAT	GO:1903561~extracellular vesicle	8	1.51229	0.0668373	ENSMUSG00000042364, ENSMUSG00000024659, ENSMUSG00000046733, ENSMUSG00000039062, ENSMUSG00000037706, ENSMUSG00000026193, ENSMUSG00000023030, ENSMUSG00000022797	488	124	16939	2.23942	1	0.430729	0.398739
GOTERM_CC_FAT	GO:0070062~extracellular exosome	7	1.32325	0.0975048	ENSMUSG00000042364, ENSMUSG00000024659, ENSMUSG00000046733, ENSMUSG00000039062, ENSMUSG00000037706, ENSMUSG00000026193, ENSMUSG00000022797	488	110	16939	2.20889	1	0.54723	0.506587
Annotation Cluster 11	Enrichment Score: 1.458562269738837
Category	Term	Count	%	PValue	Genes	List Total	Pop Hits	Pop Total	Fold Enrichment	Bonferroni	Benjamini	FDR
GOTERM_CC_FAT	GO:0000323~lytic vacuole	30	5.67108	0.00428178	ENSMUSG00000021190, ENSMUSG00000037936, ENSMUSG00000029470, ENSMUSG00000032561, ENSMUSG00000028221, ENSMUSG00000023030, ENSMUSG00000032060, ENSMUSG00000026223, ENSMUSG00000024661, ENSMUSG00000049502, ENSMUSG00000000594, ENSMUSG00000024620, ENSMUSG00000025512, ENSMUSG00000021477, ENSMUSG00000069601, ENSMUSG00000031913, ENSMUSG00000073411, ENSMUSG00000060802, ENSMUSG00000025241, ENSMUSG00000027187,…	488	597	16939	1.74427	0.960655	0.0586994	0.0543397
GOTERM_CC_FAT	GO:0005764~lysosome	30	5.67108	0.00428178	ENSMUSG00000021190, ENSMUSG00000037936, ENSMUSG00000029470, ENSMUSG00000032561, ENSMUSG00000028221, ENSMUSG00000023030, ENSMUSG00000032060, ENSMUSG00000026223, ENSMUSG00000024661, ENSMUSG00000049502, ENSMUSG00000000594, ENSMUSG00000024620, ENSMUSG00000025512, ENSMUSG00000021477, ENSMUSG00000069601, ENSMUSG00000031913, ENSMUSG00000073411, ENSMUSG00000060802, ENSMUSG00000025241, ENSMUSG00000027187,…	488	597	16939	1.74427	0.960655	0.0586994	0.0543397
GOTERM_CC_FAT	GO:0005768~endosome	45	8.50662	0.00684004	ENSMUSG00000021190, ENSMUSG00000034109, ENSMUSG00000032561, ENSMUSG00000052397, ENSMUSG00000028221, ENSMUSG00000074364, ENSMUSG00000023030, ENSMUSG00000040249, ENSMUSG00000023175, ENSMUSG00000025810, ENSMUSG00000049502, ENSMUSG00000020122, ENSMUSG00000048832, ENSMUSG00000028868, ENSMUSG00000005125, ENSMUSG00000025512, ENSMUSG00000021477, ENSMUSG00000042364, ENSMUSG00000000957, ENSMUSG00000022108,…	488	1042	16939	1.49904	0.994344	0.0831837	0.0770056
GOTERM_CC_FAT	GO:0005773~vacuole	31	5.86011	0.0219575	ENSMUSG00000021190, ENSMUSG00000037936, ENSMUSG00000029470, ENSMUSG00000032561, ENSMUSG00000028221, ENSMUSG00000023030, ENSMUSG00000032060, ENSMUSG00000026223, ENSMUSG00000024661, ENSMUSG00000049502, ENSMUSG00000000594, ENSMUSG00000024620, ENSMUSG00000025512, ENSMUSG00000021477, ENSMUSG00000069601, ENSMUSG00000031913, ENSMUSG00000073411, ENSMUSG00000060802, ENSMUSG00000025241, ENSMUSG00000078853,…	488	707	16939	1.52198	1	0.217841	0.201662
GOTERM_CC_FAT	GO:0010008~endosome membrane	23	4.34783	0.0246235	ENSMUSG00000012428, ENSMUSG00000060802, ENSMUSG00000034109, ENSMUSG00000028221, ENSMUSG00000074364, ENSMUSG00000029560, ENSMUSG00000023030, ENSMUSG00000061232, ENSMUSG00000049502, ENSMUSG00000048832, ENSMUSG00000020122, ENSMUSG00000022797, ENSMUSG00000005125, ENSMUSG00000042364, ENSMUSG00000024659, ENSMUSG00000022108, ENSMUSG00000028618, ENSMUSG00000047368, ENSMUSG00000018340, ENSMUSG00000046230,…	488	486	16939	1.6427	1	0.23276	0.215473
GOTERM_CC_FAT	GO:0044440~endosomal part	23	4.34783	0.0460605	ENSMUSG00000012428, ENSMUSG00000060802, ENSMUSG00000034109, ENSMUSG00000028221, ENSMUSG00000074364, ENSMUSG00000029560, ENSMUSG00000023030, ENSMUSG00000061232, ENSMUSG00000049502, ENSMUSG00000048832, ENSMUSG00000020122, ENSMUSG00000022797, ENSMUSG00000005125, ENSMUSG00000042364, ENSMUSG00000024659, ENSMUSG00000022108, ENSMUSG00000028618, ENSMUSG00000047368, ENSMUSG00000018340, ENSMUSG00000046230,…	488	520	16939	1.5353	1	0.354384	0.328064
GOTERM_CC_FAT	GO:0044437~vacuolar part	17	3.21361	0.0927537	ENSMUSG00000060802, ENSMUSG00000029470, ENSMUSG00000032561, ENSMUSG00000078853, ENSMUSG00000028221, ENSMUSG00000023030, ENSMUSG00000061232, ENSMUSG00000026223, ENSMUSG00000049502, ENSMUSG00000024620, ENSMUSG00000028618, ENSMUSG00000018340, ENSMUSG00000046230, ENSMUSG00000031913, ENSMUSG00000073411, ENSMUSG00000002808, ENSMUSG00000031007	488	386	16939	1.52873	1	0.535557	0.495781
GOTERM_CC_FAT	GO:0044433~cytoplasmic vesicle part	37	6.99433	0.107871	ENSMUSG00000034109, ENSMUSG00000028221, ENSMUSG00000074364, ENSMUSG00000023030, ENSMUSG00000023175, ENSMUSG00000024661, ENSMUSG00000049502, ENSMUSG00000020122, ENSMUSG00000048832, ENSMUSG00000026822, ENSMUSG00000005125, ENSMUSG00000042364, ENSMUSG00000024308, ENSMUSG00000022108, ENSMUSG00000021814, ENSMUSG00000032849, ENSMUSG00000031913, ENSMUSG00000037852, ENSMUSG00000073411, ENSMUSG00000012428,…	488	1011	16939	1.27034	1	0.5798	0.536738
GOTERM_CC_FAT	GO:0098852~lytic vacuole membrane	13	2.45747	0.140531	ENSMUSG00000060802, ENSMUSG00000029470, ENSMUSG00000032561, ENSMUSG00000028221, ENSMUSG00000023030, ENSMUSG00000061232, ENSMUSG00000026223, ENSMUSG00000049502, ENSMUSG00000028618, ENSMUSG00000018340, ENSMUSG00000046230, ENSMUSG00000073411, ENSMUSG00000031007	488	293	16939	1.54008	1	0.662736	0.613515
GOTERM_CC_FAT	GO:0005765~lysosomal membrane	13	2.45747	0.140531	ENSMUSG00000060802, ENSMUSG00000029470, ENSMUSG00000032561, ENSMUSG00000028221, ENSMUSG00000023030, ENSMUSG00000061232, ENSMUSG00000026223, ENSMUSG00000049502, ENSMUSG00000028618, ENSMUSG00000018340, ENSMUSG00000046230, ENSMUSG00000073411, ENSMUSG00000031007	488	293	16939	1.54008	1	0.662736	0.613515
GOTERM_CC_FAT	GO:0005774~vacuolar membrane	15	2.83554	0.146374	ENSMUSG00000060802, ENSMUSG00000029470, ENSMUSG00000032561, ENSMUSG00000078853, ENSMUSG00000028221, ENSMUSG00000023030, ENSMUSG00000061232, ENSMUSG00000026223, ENSMUSG00000049502, ENSMUSG00000028618, ENSMUSG00000018340, ENSMUSG00000046230, ENSMUSG00000031913, ENSMUSG00000073411, ENSMUSG00000031007	488	355	16939	1.46666	1	0.681273	0.630674
Annotation Cluster 12	Enrichment Score: 1.4029199439712414
Category	Term	Count	%	PValue	Genes	List Total	Pop Hits	Pop Total	Fold Enrichment	Bonferroni	Benjamini	FDR
GOTERM_CC_FAT	GO:0030424~axon	31	5.86011	0.016969	ENSMUSG00000029470, ENSMUSG00000027254, ENSMUSG00000058056, ENSMUSG00000029231, ENSMUSG00000040249, ENSMUSG00000026104, ENSMUSG00000027797, ENSMUSG00000023175, ENSMUSG00000032060, ENSMUSG00000025810, ENSMUSG00000026966, ENSMUSG00000004951, ENSMUSG00000040466, ENSMUSG00000069601, ENSMUSG00000022629, ENSMUSG00000035873, ENSMUSG00000019889, ENSMUSG00000029223, ENSMUSG00000032011, ENSMUSG00000062908,…	488	695	16939	1.54826	0.999998	0.175269	0.162252
GOTERM_CC_FAT	GO:0043005~neuron projection	61	11.5312	0.0205584	ENSMUSG00000029470, ENSMUSG00000027254, ENSMUSG00000029231, ENSMUSG00000004931, ENSMUSG00000021591, ENSMUSG00000023175, ENSMUSG00000026966, ENSMUSG00000024304, ENSMUSG00000025555, ENSMUSG00000040466, ENSMUSG00000021477, ENSMUSG00000042364, ENSMUSG00000001507, ENSMUSG00000003849, ENSMUSG00000069601, ENSMUSG00000021756, ENSMUSG00000047454, ENSMUSG00000037852, ENSMUSG00000047250, ENSMUSG00000031996,…	488	1606	16939	1.31842	1	0.20668	0.19133
GOTERM_CC_FAT	GO:0044297~cell body	37	6.99433	0.0282907	ENSMUSG00000031278, ENSMUSG00000029470, ENSMUSG00000052397, ENSMUSG00000027254, ENSMUSG00000058056, ENSMUSG00000021591, ENSMUSG00000040249, ENSMUSG00000032060, ENSMUSG00000025810, ENSMUSG00000004951, ENSMUSG00000021477, ENSMUSG00000026249, ENSMUSG00000042364, ENSMUSG00000043079, ENSMUSG00000046402, ENSMUSG00000003849, ENSMUSG00000021756, ENSMUSG00000047454, ENSMUSG00000034220, ENSMUSG00000037852,…	488	901	16939	1.42543	1	0.248799	0.23032
GOTERM_CC_FAT	GO:0036477~somatodendritic compartment	45	8.50662	0.0507023	ENSMUSG00000031278, ENSMUSG00000029470, ENSMUSG00000027254, ENSMUSG00000058056, ENSMUSG00000004931, ENSMUSG00000021591, ENSMUSG00000040249, ENSMUSG00000026104, ENSMUSG00000032060, ENSMUSG00000025810, ENSMUSG00000004951, ENSMUSG00000025555, ENSMUSG00000021477, ENSMUSG00000026249, ENSMUSG00000042364, ENSMUSG00000043079, ENSMUSG00000003849, ENSMUSG00000069601, ENSMUSG00000021756, ENSMUSG00000047454,…	488	1189	16939	1.31371	1	0.383551	0.355064
GOTERM_CC_FAT	GO:0097458~neuron part	77	14.5558	0.0538104	ENSMUSG00000054277, ENSMUSG00000031278, ENSMUSG00000029470, ENSMUSG00000007880, ENSMUSG00000027254, ENSMUSG00000029231, ENSMUSG00000004931, ENSMUSG00000021591, ENSMUSG00000023175, ENSMUSG00000026966, ENSMUSG00000024304, ENSMUSG00000025555, ENSMUSG00000040466, ENSMUSG00000021477, ENSMUSG00000026249, ENSMUSG00000042364, ENSMUSG00000001507, ENSMUSG00000003849, ENSMUSG00000069601, ENSMUSG00000021756,…	488	2214	16939	1.20721	1	0.38641	0.357711
GOTERM_CC_FAT	GO:0043025~neuronal cell body	32	6.04915	0.060834	ENSMUSG00000031278, ENSMUSG00000029470, ENSMUSG00000027254, ENSMUSG00000058056, ENSMUSG00000021591, ENSMUSG00000040249, ENSMUSG00000032060, ENSMUSG00000025810, ENSMUSG00000004951, ENSMUSG00000021477, ENSMUSG00000026249, ENSMUSG00000042364, ENSMUSG00000043079, ENSMUSG00000003849, ENSMUSG00000021756, ENSMUSG00000047454, ENSMUSG00000034220, ENSMUSG00000037852, ENSMUSG00000035873, ENSMUSG00000019889,…	488	805	16939	1.37982	1	0.405919	0.375771
GOTERM_CC_FAT	GO:0030425~dendrite	32	6.04915	0.0923059	ENSMUSG00000029470, ENSMUSG00000027254, ENSMUSG00000004931, ENSMUSG00000021591, ENSMUSG00000040249, ENSMUSG00000026104, ENSMUSG00000032060, ENSMUSG00000004951, ENSMUSG00000025555, ENSMUSG00000043079, ENSMUSG00000003849, ENSMUSG00000069601, ENSMUSG00000021756, ENSMUSG00000047454, ENSMUSG00000022629, ENSMUSG00000037852, ENSMUSG00000031996, ENSMUSG00000019889, ENSMUSG00000030421, ENSMUSG00000001270,…	488	836	16939	1.32865	1	0.535557	0.495781
Annotation Cluster 13	Enrichment Score: 1.3316497963292224
Category	Term	Count	%	PValue	Genes	List Total	Pop Hits	Pop Total	Fold Enrichment	Bonferroni	Benjamini	FDR
GOTERM_CC_FAT	GO:0014704~intercalated disc	7	1.32325	0.0124523	ENSMUSG00000069601, ENSMUSG00000041957, ENSMUSG00000018340, ENSMUSG00000057738, ENSMUSG00000052698, ENSMUSG00000026576, ENSMUSG00000024304	488	67	16939	3.62653	0.999921	0.136073	0.125966
GOTERM_CC_FAT	GO:0044291~cell-cell contact zone	7	1.32325	0.0451179	ENSMUSG00000069601, ENSMUSG00000041957, ENSMUSG00000018340, ENSMUSG00000057738, ENSMUSG00000052698, ENSMUSG00000026576, ENSMUSG00000024304	488	90	16939	2.69975	1	0.35071	0.324663
GOTERM_CC_FAT	GO:0005916~fascia adherens	3	0.567108	0.0521858	ENSMUSG00000057738, ENSMUSG00000052698, ENSMUSG00000024304	488	13	16939	8.01025	1	0.383551	0.355064
GOTERM_CC_FAT	GO:0005913~cell-cell adherens junction	3	0.567108	0.160787	ENSMUSG00000057738, ENSMUSG00000052698, ENSMUSG00000024304	488	25	16939	4.16533	1	0.708966	0.656311
Annotation Cluster 14	Enrichment Score: 1.3215872699744866
Category	Term	Count	%	PValue	Genes	List Total	Pop Hits	Pop Total	Fold Enrichment	Bonferroni	Benjamini	FDR
GOTERM_CC_FAT	GO:0090575~RNA polymerase II transcription factor complex	15	2.83554	0.00856476	ENSMUSG00000031311, ENSMUSG00000056501, ENSMUSG00000024081, ENSMUSG00000052684, ENSMUSG00000028266, ENSMUSG00000041959, ENSMUSG00000026104, ENSMUSG00000002325, ENSMUSG00000021103, ENSMUSG00000020962, ENSMUSG00000021548, ENSMUSG00000020801, ENSMUSG00000052534, ENSMUSG00000045482, ENSMUSG00000027080	488	236	16939	2.20621	0.998475	0.101819	0.0942572
GOTERM_CC_FAT	GO:0044798~nuclear transcription factor complex	15	2.83554	0.0181022	ENSMUSG00000031311, ENSMUSG00000056501, ENSMUSG00000024081, ENSMUSG00000052684, ENSMUSG00000028266, ENSMUSG00000041959, ENSMUSG00000026104, ENSMUSG00000002325, ENSMUSG00000021103, ENSMUSG00000020962, ENSMUSG00000021548, ENSMUSG00000020801, ENSMUSG00000052534, ENSMUSG00000045482, ENSMUSG00000027080	488	259	16939	2.01029	0.999999	0.184447	0.170748
GOTERM_CC_FAT	GO:0005667~transcription factor complex	20	3.78072	0.119236	ENSMUSG00000031311, ENSMUSG00000056501, ENSMUSG00000024081, ENSMUSG00000052684, ENSMUSG00000028266, ENSMUSG00000041959, ENSMUSG00000055044, ENSMUSG00000026104, ENSMUSG00000042613, ENSMUSG00000002325, ENSMUSG00000029507, ENSMUSG00000023411, ENSMUSG00000021103, ENSMUSG00000020962, ENSMUSG00000018697, ENSMUSG00000021548, ENSMUSG00000020801, ENSMUSG00000052534, ENSMUSG00000045482, ENSMUSG00000027080	488	492	16939	1.41102	1	0.615779	0.570045
GOTERM_CC_FAT	GO:0016591~DNA-directed RNA polymerase II, holoenzyme	6	1.13422	0.279768	ENSMUSG00000020962, ENSMUSG00000021548, ENSMUSG00000020801, ENSMUSG00000045482, ENSMUSG00000027080, ENSMUSG00000021103	488	123	16939	1.69322	1	0.991407	0.917775
Annotation Cluster 15	Enrichment Score: 1.2185509721072658
Category	Term	Count	%	PValue	Genes	List Total	Pop Hits	Pop Total	Fold Enrichment	Bonferroni	Benjamini	FDR
GOTERM_CC_FAT	GO:0000792~heterochromatin	9	1.70132	0.0114073	ENSMUSG00000015937, ENSMUSG00000050295, ENSMUSG00000035021, ENSMUSG00000017548, ENSMUSG00000026037, ENSMUSG00000025001, ENSMUSG00000035024, ENSMUSG00000029687, ENSMUSG00000044303	488	106	16939	2.94717	0.999825	0.128375	0.11884
GOTERM_CC_FAT	GO:0005721~pericentric heterochromatin	5	0.94518	0.0142755	ENSMUSG00000015937, ENSMUSG00000035021, ENSMUSG00000025001, ENSMUSG00000035024, ENSMUSG00000029687	488	33	16939	5.25925	0.99998	0.153767	0.142347
GOTERM_CC_FAT	GO:0000775~chromosome, centromeric region	11	2.0794	0.242585	ENSMUSG00000056501, ENSMUSG00000015937, ENSMUSG00000035021, ENSMUSG00000026037, ENSMUSG00000025001, ENSMUSG00000035024, ENSMUSG00000020608, ENSMUSG00000028873, ENSMUSG00000038379, ENSMUSG00000029687, ENSMUSG00000027635	488	267	16939	1.43004	1	0.901031	0.834111
GOTERM_CC_FAT	GO:0098687~chromosomal region	14	2.6465	0.338187	ENSMUSG00000056501, ENSMUSG00000034218, ENSMUSG00000015937, ENSMUSG00000026037, ENSMUSG00000025001, ENSMUSG00000028873, ENSMUSG00000029687, ENSMUSG00000027635, ENSMUSG00000040331, ENSMUSG00000035021, ENSMUSG00000035024, ENSMUSG00000020608, ENSMUSG00000038379, ENSMUSG00000036940	488	391	16939	1.24285	1	1	0.926959
Annotation Cluster 16	Enrichment Score: 1.1952985004812184
Category	Term	Count	%	PValue	Genes	List Total	Pop Hits	Pop Total	Fold Enrichment	Bonferroni	Benjamini	FDR
GOTERM_CC_FAT	GO:0055029~nuclear DNA-directed RNA polymerase complex	10	1.89036	0.0253134	ENSMUSG00000020962, ENSMUSG00000025395, ENSMUSG00000021548, ENSMUSG00000020801, ENSMUSG00000027395, ENSMUSG00000045482, ENSMUSG00000026134, ENSMUSG00000022476, ENSMUSG00000027080, ENSMUSG00000021103	488	146	16939	2.37747	1	0.23276	0.215473
GOTERM_CC_FAT	GO:0000428~DNA-directed RNA polymerase complex	10	1.89036	0.0283776	ENSMUSG00000020962, ENSMUSG00000025395, ENSMUSG00000021548, ENSMUSG00000020801, ENSMUSG00000027395, ENSMUSG00000045482, ENSMUSG00000026134, ENSMUSG00000022476, ENSMUSG00000027080, ENSMUSG00000021103	488	149	16939	2.3296	1	0.248799	0.23032
GOTERM_CC_FAT	GO:0030880~RNA polymerase complex	10	1.89036	0.0305596	ENSMUSG00000020962, ENSMUSG00000025395, ENSMUSG00000021548, ENSMUSG00000020801, ENSMUSG00000027395, ENSMUSG00000045482, ENSMUSG00000026134, ENSMUSG00000022476, ENSMUSG00000027080, ENSMUSG00000021103	488	151	16939	2.29875	1	0.256022	0.237007
GOTERM_CC_FAT	GO:0061695~transferase complex, transferring phosphorus-containing groups	14	2.6465	0.171884	ENSMUSG00000025395, ENSMUSG00000027395, ENSMUSG00000026134, ENSMUSG00000005533, ENSMUSG00000022476, ENSMUSG00000025742, ENSMUSG00000021103, ENSMUSG00000020962, ENSMUSG00000021548, ENSMUSG00000020801, ENSMUSG00000045482, ENSMUSG00000037204, ENSMUSG00000027080, ENSMUSG00000011960	488	336	16939	1.44629	1	0.744832	0.689513
GOTERM_CC_FAT	GO:0016591~DNA-directed RNA polymerase II, holoenzyme	6	1.13422	0.279768	ENSMUSG00000020962, ENSMUSG00000021548, ENSMUSG00000020801, ENSMUSG00000045482, ENSMUSG00000027080, ENSMUSG00000021103	488	123	16939	1.69322	1	0.991407	0.917775
Annotation Cluster 17	Enrichment Score: 1.0751738038863567
Category	Term	Count	%	PValue	Genes	List Total	Pop Hits	Pop Total	Fold Enrichment	Bonferroni	Benjamini	FDR
GOTERM_CC_FAT	GO:0042824~MHC class I peptide loading complex	6	1.13422	0.000160213	ENSMUSG00000024308, ENSMUSG00000060802, ENSMUSG00000024339, ENSMUSG00000037321, ENSMUSG00000061232, ENSMUSG00000073411	488	19	16939	10.9614	0.113798	0.00672805	0.00622836
GOTERM_CC_FAT	GO:0030670~phagocytic vesicle membrane	7	1.32325	0.00864249	ENSMUSG00000024308, ENSMUSG00000060802, ENSMUSG00000028221, ENSMUSG00000037321, ENSMUSG00000061232, ENSMUSG00000073411, ENSMUSG00000019832	488	62	16939	3.91899	0.998562	0.101819	0.0942572
GOTERM_CC_FAT	GO:0030666~endocytic vesicle membrane	7	1.32325	0.0290592	ENSMUSG00000024308, ENSMUSG00000060802, ENSMUSG00000028221, ENSMUSG00000037321, ENSMUSG00000061232, ENSMUSG00000073411, ENSMUSG00000019832	488	81	16939	2.99972	1	0.248984	0.230492
GOTERM_CC_FAT	GO:0045335~phagocytic vesicle	7	1.32325	0.167715	ENSMUSG00000024308, ENSMUSG00000060802, ENSMUSG00000028221, ENSMUSG00000037321, ENSMUSG00000061232, ENSMUSG00000073411, ENSMUSG00000019832	488	129	16939	1.88355	1	0.730967	0.676678
GOTERM_CC_FAT	GO:0030139~endocytic vesicle	10	1.89036	0.208848	ENSMUSG00000024308, ENSMUSG00000060802, ENSMUSG00000028221, ENSMUSG00000074364, ENSMUSG00000037321, ENSMUSG00000061232, ENSMUSG00000073411, ENSMUSG00000024661, ENSMUSG00000020122, ENSMUSG00000019832	488	227	16939	1.52912	1	0.814009	0.753552
GOTERM_CC_FAT	GO:0042612~MHC class I protein complex	3	0.567108	0.22366	ENSMUSG00000060802, ENSMUSG00000061232, ENSMUSG00000073411	488	31	16939	3.35914	1	0.860406	0.796503
GOTERM_CC_FAT	GO:0042611~MHC protein complex	3	0.567108	0.393171	ENSMUSG00000060802, ENSMUSG00000061232, ENSMUSG00000073411	488	47	16939	2.2156	1	1	0.926959
GOTERM_CC_FAT	GO:0030659~cytoplasmic vesicle membrane	18	3.40265	0.435269	ENSMUSG00000060802, ENSMUSG00000032353, ENSMUSG00000028221, ENSMUSG00000024597, ENSMUSG00000023175, ENSMUSG00000061232, ENSMUSG00000053291, ENSMUSG00000042364, ENSMUSG00000047547, ENSMUSG00000024308, ENSMUSG00000018481, ENSMUSG00000021814, ENSMUSG00000032849, ENSMUSG00000037321, ENSMUSG00000037852, ENSMUSG00000073411, ENSMUSG00000031007, ENSMUSG00000019832	488	553	16939	1.12984	1	1	0.926959
GOTERM_CC_FAT	GO:0030176~integral component of endoplasmic reticulum membrane	6	1.13422	0.5531	ENSMUSG00000024308, ENSMUSG00000060802, ENSMUSG00000024339, ENSMUSG00000037321, ENSMUSG00000061232, ENSMUSG00000073411	488	172	16939	1.21085	1	1	0.926959
GOTERM_CC_FAT	GO:0031227~intrinsic component of endoplasmic reticulum membrane	6	1.13422	0.593617	ENSMUSG00000024308, ENSMUSG00000060802, ENSMUSG00000024339, ENSMUSG00000037321, ENSMUSG00000061232, ENSMUSG00000073411	488	180	16939	1.15704	1	1	0.926959
Annotation Cluster 18	Enrichment Score: 1.0462098020616173
Category	Term	Count	%	PValue	Genes	List Total	Pop Hits	Pop Total	Fold Enrichment	Bonferroni	Benjamini	FDR
GOTERM_CC_FAT	GO:0005777~peroxisome	9	1.70132	0.0791098	ENSMUSG00000031278, ENSMUSG00000034218, ENSMUSG00000018796, ENSMUSG00000008540, ENSMUSG00000027187, ENSMUSG00000053898, ENSMUSG00000025950, ENSMUSG00000024066, ENSMUSG00000022210	488	155	16939	2.01548	1	0.490418	0.453994
GOTERM_CC_FAT	GO:0042579~microbody	9	1.70132	0.0791098	ENSMUSG00000031278, ENSMUSG00000034218, ENSMUSG00000018796, ENSMUSG00000008540, ENSMUSG00000027187, ENSMUSG00000053898, ENSMUSG00000025950, ENSMUSG00000024066, ENSMUSG00000022210	488	155	16939	2.01548	1	0.490418	0.453994
GOTERM_CC_FAT	GO:0031903~microbody membrane	5	0.94518	0.093758	ENSMUSG00000031278, ENSMUSG00000018796, ENSMUSG00000008540, ENSMUSG00000027187, ENSMUSG00000022210	488	60	16939	2.89259	1	0.535557	0.495781
GOTERM_CC_FAT	GO:0005778~peroxisomal membrane	5	0.94518	0.093758	ENSMUSG00000031278, ENSMUSG00000018796, ENSMUSG00000008540, ENSMUSG00000027187, ENSMUSG00000022210	488	60	16939	2.89259	1	0.535557	0.495781
GOTERM_CC_FAT	GO:0044438~microbody part	6	1.13422	0.0979788	ENSMUSG00000031278, ENSMUSG00000034218, ENSMUSG00000018796, ENSMUSG00000008540, ENSMUSG00000027187, ENSMUSG00000022210	488	85	16939	2.45019	1	0.54723	0.506587
GOTERM_CC_FAT	GO:0044439~peroxisomal part	6	1.13422	0.0979788	ENSMUSG00000031278, ENSMUSG00000034218, ENSMUSG00000018796, ENSMUSG00000008540, ENSMUSG00000027187, ENSMUSG00000022210	488	85	16939	2.45019	1	0.54723	0.506587
Annotation Cluster 19	Enrichment Score: 1.0216454394342105
Category	Term	Count	%	PValue	Genes	List Total	Pop Hits	Pop Total	Fold Enrichment	Bonferroni	Benjamini	FDR
GOTERM_CC_FAT	GO:0000785~chromatin	29	5.48204	0.0603039	ENSMUSG00000007880, ENSMUSG00000044927, ENSMUSG00000050295, ENSMUSG00000026104, ENSMUSG00000044303, ENSMUSG00000018474, ENSMUSG00000024789, ENSMUSG00000002835, ENSMUSG00000017548, ENSMUSG00000034021, ENSMUSG00000039994, ENSMUSG00000039456, ENSMUSG00000035873, ENSMUSG00000036940, ENSMUSG00000038722, ENSMUSG00000056501, ENSMUSG00000052684, ENSMUSG00000051177, ENSMUSG00000015937, ENSMUSG00000026037,…	488	715	16939	1.40786	1	0.405919	0.375771
GOTERM_CC_FAT	GO:0005694~chromosome	51	9.64083	0.0924387	ENSMUSG00000031311, ENSMUSG00000025395, ENSMUSG00000007880, ENSMUSG00000029594, ENSMUSG00000044303, ENSMUSG00000024824, ENSMUSG00000024789, ENSMUSG00000002835, ENSMUSG00000034021, ENSMUSG00000039994, ENSMUSG00000035873, ENSMUSG00000039756, ENSMUSG00000034218, ENSMUSG00000056501, ENSMUSG00000051177, ENSMUSG00000026037, ENSMUSG00000029505, ENSMUSG00000040331, ENSMUSG00000035021, ENSMUSG00000035024,…	488	1437	16939	1.23192	1	0.535557	0.495781
GOTERM_CC_FAT	GO:0044427~chromosomal part	43	8.12854	0.154477	ENSMUSG00000007880, ENSMUSG00000025395, ENSMUSG00000044927, ENSMUSG00000050295, ENSMUSG00000026104, ENSMUSG00000042029, ENSMUSG00000044303, ENSMUSG00000027635, ENSMUSG00000024824, ENSMUSG00000018474, ENSMUSG00000024789, ENSMUSG00000002835, ENSMUSG00000017548, ENSMUSG00000022906, ENSMUSG00000034021, ENSMUSG00000039994, ENSMUSG00000020608, ENSMUSG00000039456, ENSMUSG00000035873, ENSMUSG00000036940,…	488	1240	16939	1.20369	1	0.708966	0.656311
Annotation Cluster 20	Enrichment Score: 0.7939521970245051
Category	Term	Count	%	PValue	Genes	List Total	Pop Hits	Pop Total	Fold Enrichment	Bonferroni	Benjamini	FDR
GOTERM_CC_FAT	GO:0019897~extrinsic component of plasma membrane	12	2.26843	0.0353135	ENSMUSG00000042364, ENSMUSG00000031673, ENSMUSG00000024659, ENSMUSG00000024789, ENSMUSG00000047454, ENSMUSG00000041959, ENSMUSG00000031748, ENSMUSG00000036402, ENSMUSG00000024304, ENSMUSG00000024697, ENSMUSG00000025555, ENSMUSG00000026249	488	205	16939	2.03187	1	0.289417	0.267922
GOTERM_CC_FAT	GO:0031234~extrinsic component of cytoplasmic side of plasma membrane	7	1.32325	0.110731	ENSMUSG00000042364, ENSMUSG00000024789, ENSMUSG00000047454, ENSMUSG00000031748, ENSMUSG00000036402, ENSMUSG00000024697, ENSMUSG00000025555	488	114	16939	2.13138	1	0.5798	0.536738
GOTERM_CC_FAT	GO:0019898~extrinsic component of membrane	16	3.02457	0.127265	ENSMUSG00000031673, ENSMUSG00000052397, ENSMUSG00000041959, ENSMUSG00000074364, ENSMUSG00000026643, ENSMUSG00000024304, ENSMUSG00000024697, ENSMUSG00000025555, ENSMUSG00000026249, ENSMUSG00000042364, ENSMUSG00000024659, ENSMUSG00000024789, ENSMUSG00000047454, ENSMUSG00000046230, ENSMUSG00000031748, ENSMUSG00000036402	488	376	16939	1.47707	1	0.644013	0.596182
GOTERM_CC_FAT	GO:0009898~cytoplasmic side of plasma membrane	9	1.70132	0.200175	ENSMUSG00000042364, ENSMUSG00000024789, ENSMUSG00000047454, ENSMUSG00000052397, ENSMUSG00000031748, ENSMUSG00000036402, ENSMUSG00000024697, ENSMUSG00000025555, ENSMUSG00000000594	488	195	16939	1.60205	1	0.814009	0.753552
GOTERM_CC_FAT	GO:0005834~heterotrimeric G-protein complex	3	0.567108	0.277284	ENSMUSG00000031748, ENSMUSG00000036402, ENSMUSG00000024697	488	36	16939	2.89259	1	0.991407	0.917775
GOTERM_CC_FAT	GO:1905360~GTPase complex	3	0.567108	0.298727	ENSMUSG00000031748, ENSMUSG00000036402, ENSMUSG00000024697	488	38	16939	2.74035	1	1	0.926959
GOTERM_CC_FAT	GO:0098562~cytoplasmic side of membrane	9	1.70132	0.335588	ENSMUSG00000042364, ENSMUSG00000024789, ENSMUSG00000047454, ENSMUSG00000052397, ENSMUSG00000031748, ENSMUSG00000036402, ENSMUSG00000024697, ENSMUSG00000025555, ENSMUSG00000000594	488	228	16939	1.37017	1	1	0.926959
Annotation Cluster 21	Enrichment Score: 0.7919715767880725
Category	Term	Count	%	PValue	Genes	List Total	Pop Hits	Pop Total	Fold Enrichment	Bonferroni	Benjamini	FDR
GOTERM_CC_FAT	GO:0005923~bicellular tight junction	8	1.51229	0.131639	ENSMUSG00000043079, ENSMUSG00000040296, ENSMUSG00000069601, ENSMUSG00000057440, ENSMUSG00000029070, ENSMUSG00000038235, ENSMUSG00000030403, ENSMUSG00000037643	488	147	16939	1.88904	1	0.655894	0.60718
GOTERM_CC_FAT	GO:0005911~cell-cell junction	19	3.59168	0.133792	ENSMUSG00000041957, ENSMUSG00000057440, ENSMUSG00000026576, ENSMUSG00000024304, ENSMUSG00000028868, ENSMUSG00000043079, ENSMUSG00000068566, ENSMUSG00000040296, ENSMUSG00000069601, ENSMUSG00000070047, ENSMUSG00000018340, ENSMUSG00000029070, ENSMUSG00000038235, ENSMUSG00000057738, ENSMUSG00000052698, ENSMUSG00000037643, ENSMUSG00000030403, ENSMUSG00000019889, ENSMUSG00000017314	488	469	16939	1.40621	1	0.656051	0.607326
GOTERM_CC_FAT	GO:0070160~occluding junction	8	1.51229	0.166992	ENSMUSG00000043079, ENSMUSG00000040296, ENSMUSG00000069601, ENSMUSG00000057440, ENSMUSG00000029070, ENSMUSG00000038235, ENSMUSG00000030403, ENSMUSG00000037643	488	157	16939	1.76872	1	0.730967	0.676678
GOTERM_CC_FAT	GO:0043296~apical junction complex	8	1.51229	0.230993	ENSMUSG00000043079, ENSMUSG00000040296, ENSMUSG00000069601, ENSMUSG00000057440, ENSMUSG00000029070, ENSMUSG00000038235, ENSMUSG00000030403, ENSMUSG00000037643	488	173	16939	1.60514	1	0.870845	0.806167
Annotation Cluster 22	Enrichment Score: 0.7892117630886718
Category	Term	Count	%	PValue	Genes	List Total	Pop Hits	Pop Total	Fold Enrichment	Bonferroni	Benjamini	FDR
GOTERM_CC_FAT	GO:0044421~extracellular region part	86	16.2571	0.0655966	ENSMUSG00000057346, ENSMUSG00000029672, ENSMUSG00000032561, ENSMUSG00000017969, ENSMUSG00000058672, ENSMUSG00000041959, ENSMUSG00000074364, ENSMUSG00000026043, ENSMUSG00000022483, ENSMUSG00000054072, ENSMUSG00000024066, ENSMUSG00000029759, ENSMUSG00000007888, ENSMUSG00000040026, ENSMUSG00000025512, ENSMUSG00000021477, ENSMUSG00000026249, ENSMUSG00000042364, ENSMUSG00000001506, ENSMUSG00000021756,…	488	2528	16939	1.18084	1	0.430086	0.398143
GOTERM_CC_FAT	GO:0005576~extracellular region	98	18.5255	0.192275	ENSMUSG00000029672, ENSMUSG00000057346, ENSMUSG00000032561, ENSMUSG00000017969, ENSMUSG00000058672, ENSMUSG00000041959, ENSMUSG00000074364, ENSMUSG00000026043, ENSMUSG00000022483, ENSMUSG00000054072, ENSMUSG00000024661, ENSMUSG00000007888, ENSMUSG00000025512, ENSMUSG00000042364, ENSMUSG00000034220, ENSMUSG00000068196, ENSMUSG00000037852, ENSMUSG00000029661, ENSMUSG00000001270, ENSMUSG00000031740,…	488	3110	16939	1.09379	1	0.792217	0.733379
GOTERM_CC_FAT	GO:0005615~extracellular space	68	12.8544	0.340063	ENSMUSG00000057346, ENSMUSG00000029672, ENSMUSG00000032561, ENSMUSG00000017969, ENSMUSG00000041959, ENSMUSG00000026043, ENSMUSG00000022483, ENSMUSG00000024066, ENSMUSG00000029759, ENSMUSG00000007888, ENSMUSG00000040026, ENSMUSG00000025512, ENSMUSG00000021477, ENSMUSG00000026249, ENSMUSG00000001506, ENSMUSG00000021756, ENSMUSG00000034220, ENSMUSG00000068196, ENSMUSG00000037852, ENSMUSG00000031555,…	488	2212	16939	1.06707	1	1	0.926959
Annotation Cluster 23	Enrichment Score: 0.752224431528318
Category	Term	Count	%	PValue	Genes	List Total	Pop Hits	Pop Total	Fold Enrichment	Bonferroni	Benjamini	FDR
GOTERM_CC_FAT	GO:0031985~Golgi cisterna	9	1.70132	0.0246103	ENSMUSG00000032640, ENSMUSG00000028618, ENSMUSG00000034109, ENSMUSG00000032353, ENSMUSG00000032561, ENSMUSG00000061232, ENSMUSG00000073411, ENSMUSG00000003316, ENSMUSG00000054072	488	122	16939	2.56065	1	0.23276	0.215473
GOTERM_CC_FAT	GO:0005797~Golgi medial cisterna	4	0.756144	0.0414443	ENSMUSG00000028618, ENSMUSG00000061232, ENSMUSG00000073411, ENSMUSG00000003316	488	27	16939	5.14238	1	0.32551	0.301335
GOTERM_CC_FAT	GO:0005795~Golgi stack	9	1.70132	0.0791098	ENSMUSG00000032640, ENSMUSG00000028618, ENSMUSG00000034109, ENSMUSG00000032353, ENSMUSG00000032561, ENSMUSG00000061232, ENSMUSG00000073411, ENSMUSG00000003316, ENSMUSG00000054072	488	155	16939	2.01548	1	0.490418	0.453994
GOTERM_CC_FAT	GO:0031984~organelle subcompartment	15	2.83554	0.301386	ENSMUSG00000032640, ENSMUSG00000034109, ENSMUSG00000032353, ENSMUSG00000032561, ENSMUSG00000023030, ENSMUSG00000027820, ENSMUSG00000061232, ENSMUSG00000003316, ENSMUSG00000054072, ENSMUSG00000025512, ENSMUSG00000047547, ENSMUSG00000024759, ENSMUSG00000028618, ENSMUSG00000073411, ENSMUSG00000019832	488	412	16939	1.26375	1	1	0.926959
GOTERM_CC_FAT	GO:0098791~Golgi subcompartment	14	2.6465	0.308613	ENSMUSG00000032640, ENSMUSG00000034109, ENSMUSG00000032353, ENSMUSG00000032561, ENSMUSG00000023030, ENSMUSG00000027820, ENSMUSG00000061232, ENSMUSG00000003316, ENSMUSG00000054072, ENSMUSG00000025512, ENSMUSG00000047547, ENSMUSG00000028618, ENSMUSG00000073411, ENSMUSG00000019832	488	382	16939	1.27213	1	1	0.926959
GOTERM_CC_FAT	GO:0032580~Golgi cisterna membrane	4	0.756144	0.366215	ENSMUSG00000032640, ENSMUSG00000034109, ENSMUSG00000032353, ENSMUSG00000054072	488	75	16939	1.85126	1	1	0.926959
GOTERM_CC_FAT	GO:0044431~Golgi apparatus part	26	4.91493	0.580105	ENSMUSG00000054277, ENSMUSG00000032640, ENSMUSG00000034109, ENSMUSG00000032561, ENSMUSG00000023030, ENSMUSG00000054072, ENSMUSG00000020122, ENSMUSG00000025512, ENSMUSG00000024308, ENSMUSG00000022108, ENSMUSG00000034220, ENSMUSG00000073411, ENSMUSG00000028270, ENSMUSG00000012428, ENSMUSG00000029344, ENSMUSG00000033487, ENSMUSG00000032353, ENSMUSG00000056220, ENSMUSG00000078853, ENSMUSG00000027820,…	488	891	16939	1.01289	1	1	0.926959
GOTERM_CC_FAT	GO:0000139~Golgi membrane	19	3.59168	0.602023	ENSMUSG00000012428, ENSMUSG00000054277, ENSMUSG00000029344, ENSMUSG00000032640, ENSMUSG00000033487, ENSMUSG00000034109, ENSMUSG00000032353, ENSMUSG00000056220, ENSMUSG00000078853, ENSMUSG00000061232, ENSMUSG00000003316, ENSMUSG00000054072, ENSMUSG00000020122, ENSMUSG00000024308, ENSMUSG00000022108, ENSMUSG00000028618, ENSMUSG00000037643, ENSMUSG00000073411, ENSMUSG00000028270	488	651	16939	1.01307	1	1	0.926959
Annotation Cluster 24	Enrichment Score: 0.7024357667695231
Category	Term	Count	%	PValue	Genes	List Total	Pop Hits	Pop Total	Fold Enrichment	Bonferroni	Benjamini	FDR
GOTERM_CC_FAT	GO:0030864~cortical actin cytoskeleton	7	1.32325	0.0411566	ENSMUSG00000022090, ENSMUSG00000068566, ENSMUSG00000029761, ENSMUSG00000031827, ENSMUSG00000057738, ENSMUSG00000015932, ENSMUSG00000024304	488	88	16939	2.76111	1	0.32551	0.301335
GOTERM_CC_FAT	GO:0030863~cortical cytoskeleton	7	1.32325	0.143598	ENSMUSG00000022090, ENSMUSG00000068566, ENSMUSG00000029761, ENSMUSG00000031827, ENSMUSG00000057738, ENSMUSG00000015932, ENSMUSG00000024304	488	123	16939	1.97543	1	0.672501	0.622554
GOTERM_CC_FAT	GO:0044448~cell cortex part	8	1.51229	0.354829	ENSMUSG00000047547, ENSMUSG00000022090, ENSMUSG00000068566, ENSMUSG00000029761, ENSMUSG00000031827, ENSMUSG00000057738, ENSMUSG00000015932, ENSMUSG00000024304	488	200	16939	1.38844	1	1	0.926959
GOTERM_CC_FAT	GO:0005938~cell cortex	13	2.45747	0.38253	ENSMUSG00000022090, ENSMUSG00000031024, ENSMUSG00000029761, ENSMUSG00000067818, ENSMUSG00000052397, ENSMUSG00000057440, ENSMUSG00000024304, ENSMUSG00000006356, ENSMUSG00000047547, ENSMUSG00000068566, ENSMUSG00000031827, ENSMUSG00000057738, ENSMUSG00000015932	488	370	16939	1.21958	1	1	0.926959
GOTERM_CC_FAT	GO:0099568~cytoplasmic region	16	3.02457	0.38331	ENSMUSG00000022090, ENSMUSG00000031024, ENSMUSG00000029761, ENSMUSG00000029223, ENSMUSG00000067818, ENSMUSG00000052397, ENSMUSG00000027254, ENSMUSG00000057440, ENSMUSG00000024304, ENSMUSG00000006356, ENSMUSG00000004951, ENSMUSG00000047547, ENSMUSG00000068566, ENSMUSG00000031827, ENSMUSG00000057738, ENSMUSG00000015932	488	471	16939	1.17914	1	1	0.926959
Annotation Cluster 25	Enrichment Score: 0.6535060695115762
Category	Term	Count	%	PValue	Genes	List Total	Pop Hits	Pop Total	Fold Enrichment	Bonferroni	Benjamini	FDR
GOTERM_CC_FAT	GO:0044433~cytoplasmic vesicle part	37	6.99433	0.107871	ENSMUSG00000034109, ENSMUSG00000028221, ENSMUSG00000074364, ENSMUSG00000023030, ENSMUSG00000023175, ENSMUSG00000024661, ENSMUSG00000049502, ENSMUSG00000020122, ENSMUSG00000048832, ENSMUSG00000026822, ENSMUSG00000005125, ENSMUSG00000042364, ENSMUSG00000024308, ENSMUSG00000022108, ENSMUSG00000021814, ENSMUSG00000032849, ENSMUSG00000031913, ENSMUSG00000037852, ENSMUSG00000073411, ENSMUSG00000012428,…	488	1011	16939	1.27034	1	0.5798	0.536738
GOTERM_CC_FAT	GO:0012506~vesicle membrane	21	3.96975	0.233248	ENSMUSG00000060802, ENSMUSG00000033487, ENSMUSG00000032353, ENSMUSG00000032561, ENSMUSG00000028221, ENSMUSG00000024597, ENSMUSG00000023175, ENSMUSG00000061232, ENSMUSG00000053291, ENSMUSG00000042364, ENSMUSG00000047547, ENSMUSG00000024308, ENSMUSG00000018481, ENSMUSG00000021814, ENSMUSG00000032849, ENSMUSG00000037321, ENSMUSG00000037852, ENSMUSG00000073411, ENSMUSG00000028270, ENSMUSG00000031007,…	488	581	16939	1.25462	1	0.874746	0.809778
GOTERM_CC_FAT	GO:0030659~cytoplasmic vesicle membrane	18	3.40265	0.435269	ENSMUSG00000060802, ENSMUSG00000032353, ENSMUSG00000028221, ENSMUSG00000024597, ENSMUSG00000023175, ENSMUSG00000061232, ENSMUSG00000053291, ENSMUSG00000042364, ENSMUSG00000047547, ENSMUSG00000024308, ENSMUSG00000018481, ENSMUSG00000021814, ENSMUSG00000032849, ENSMUSG00000037321, ENSMUSG00000037852, ENSMUSG00000073411, ENSMUSG00000031007, ENSMUSG00000019832	488	553	16939	1.12984	1	1	0.926959
Annotation Cluster 26	Enrichment Score: 0.5947715550023418
Category	Term	Count	%	PValue	Genes	List Total	Pop Hits	Pop Total	Fold Enrichment	Bonferroni	Benjamini	FDR
GOTERM_CC_FAT	GO:0019908~nuclear cyclin-dependent protein kinase holoenzyme complex	3	0.567108	0.0521858	ENSMUSG00000021548, ENSMUSG00000011960, ENSMUSG00000021103	488	13	16939	8.01025	1	0.383551	0.355064
GOTERM_CC_FAT	GO:0032806~carboxy-terminal domain protein kinase complex	3	0.567108	0.130778	ENSMUSG00000021548, ENSMUSG00000011960, ENSMUSG00000021103	488	22	16939	4.73333	1	0.655894	0.60718
GOTERM_CC_FAT	GO:0000307~cyclin-dependent protein kinase holoenzyme complex	3	0.567108	0.46252	ENSMUSG00000021548, ENSMUSG00000011960, ENSMUSG00000021103	488	54	16939	1.92839	1	1	0.926959
GOTERM_CC_FAT	GO:1902911~protein kinase complex	5	0.94518	0.575126	ENSMUSG00000021548, ENSMUSG00000005533, ENSMUSG00000037204, ENSMUSG00000011960, ENSMUSG00000021103	488	140	16939	1.23968	1	1	0.926959
GOTERM_CC_FAT	GO:1902554~serine/threonine protein kinase complex	4	0.756144	0.585009	ENSMUSG00000021548, ENSMUSG00000037204, ENSMUSG00000011960, ENSMUSG00000021103	488	105	16939	1.32233	1	1	0.926959
Annotation Cluster 27	Enrichment Score: 0.5411592462613887
Category	Term	Count	%	PValue	Genes	List Total	Pop Hits	Pop Total	Fold Enrichment	Bonferroni	Benjamini	FDR
GOTERM_CC_FAT	GO:0016607~nuclear speck	17	3.21361	0.227281	ENSMUSG00000031311, ENSMUSG00000051177, ENSMUSG00000029594, ENSMUSG00000027951, ENSMUSG00000029505, ENSMUSG00000010608, ENSMUSG00000020572, ENSMUSG00000023411, ENSMUSG00000042029, ENSMUSG00000024339, ENSMUSG00000002625, ENSMUSG00000038047, ENSMUSG00000020409, ENSMUSG00000020608, ENSMUSG00000073489, ENSMUSG00000052406, ENSMUSG00000036854	488	450	16939	1.31131	1	0.869897	0.805289
GOTERM_CC_FAT	GO:0044451~nucleoplasm part	41	7.75047	0.311649	ENSMUSG00000031311, ENSMUSG00000013822, ENSMUSG00000029594, ENSMUSG00000027951, ENSMUSG00000023411, ENSMUSG00000042029, ENSMUSG00000044303, ENSMUSG00000027635, ENSMUSG00000020962, ENSMUSG00000018474, ENSMUSG00000037174, ENSMUSG00000020801, ENSMUSG00000017548, ENSMUSG00000020409, ENSMUSG00000038047, ENSMUSG00000020608, ENSMUSG00000039456, ENSMUSG00000027080, ENSMUSG00000011960, ENSMUSG00000079487,…	488	1279	16939	1.11271	1	1	0.926959
GOTERM_CC_FAT	GO:0016604~nuclear body	29	5.48204	0.335964	ENSMUSG00000031311, ENSMUSG00000029594, ENSMUSG00000027951, ENSMUSG00000023411, ENSMUSG00000042029, ENSMUSG00000044303, ENSMUSG00000027635, ENSMUSG00000018474, ENSMUSG00000037174, ENSMUSG00000017548, ENSMUSG00000020409, ENSMUSG00000038047, ENSMUSG00000020608, ENSMUSG00000039456, ENSMUSG00000051177, ENSMUSG00000060121, ENSMUSG00000029427, ENSMUSG00000029505, ENSMUSG00000041548, ENSMUSG00000010608,…	488	887	16939	1.13486	1	1	0.926959
Annotation Cluster 28	Enrichment Score: 0.5047137212919569
Category	Term	Count	%	PValue	Genes	List Total	Pop Hits	Pop Total	Fold Enrichment	Bonferroni	Benjamini	FDR
GOTERM_CC_FAT	GO:0005903~brush border	8	1.51229	0.159608	ENSMUSG00000039450, ENSMUSG00000039062, ENSMUSG00000020733, ENSMUSG00000052397, ENSMUSG00000023030, ENSMUSG00000027820, ENSMUSG00000029802, ENSMUSG00000037643	488	155	16939	1.79154	1	0.708966	0.656311
GOTERM_CC_FAT	GO:0031526~brush border membrane	4	0.756144	0.436037	ENSMUSG00000039062, ENSMUSG00000020733, ENSMUSG00000023030, ENSMUSG00000029802	488	84	16939	1.65291	1	1	0.926959
GOTERM_CC_FAT	GO:0098862~cluster of actin-based cell projections	8	1.51229	0.439828	ENSMUSG00000039450, ENSMUSG00000039062, ENSMUSG00000020733, ENSMUSG00000052397, ENSMUSG00000023030, ENSMUSG00000027820, ENSMUSG00000029802, ENSMUSG00000037643	488	218	16939	1.2738	1	1	0.926959
Annotation Cluster 29	Enrichment Score: 0.48692565846728836
Category	Term	Count	%	PValue	Genes	List Total	Pop Hits	Pop Total	Fold Enrichment	Bonferroni	Benjamini	FDR
GOTERM_CC_FAT	GO:0000779~condensed chromosome, centromeric region	4	0.756144	0.132223	ENSMUSG00000056501, ENSMUSG00000026037, ENSMUSG00000035024, ENSMUSG00000027635	488	44	16939	3.15555	1	0.655894	0.60718
GOTERM_CC_FAT	GO:0000775~chromosome, centromeric region	11	2.0794	0.242585	ENSMUSG00000056501, ENSMUSG00000015937, ENSMUSG00000035021, ENSMUSG00000026037, ENSMUSG00000025001, ENSMUSG00000035024, ENSMUSG00000020608, ENSMUSG00000028873, ENSMUSG00000038379, ENSMUSG00000029687, ENSMUSG00000027635	488	267	16939	1.43004	1	0.901031	0.834111
GOTERM_CC_FAT	GO:0000793~condensed chromosome	9	1.70132	0.402754	ENSMUSG00000024824, ENSMUSG00000056501, ENSMUSG00000040331, ENSMUSG00000015937, ENSMUSG00000026037, ENSMUSG00000035024, ENSMUSG00000020608, ENSMUSG00000027635, ENSMUSG00000042029	488	243	16939	1.2856	1	1	0.926959
GOTERM_CC_FAT	GO:0000776~kinetochore	4	0.756144	0.873147	ENSMUSG00000026037, ENSMUSG00000035024, ENSMUSG00000038379, ENSMUSG00000027635	488	171	16939	0.811955	1	1	0.926959
Annotation Cluster 30	Enrichment Score: 0.3978084456366246
Category	Term	Count	%	PValue	Genes	List Total	Pop Hits	Pop Total	Fold Enrichment	Bonferroni	Benjamini	FDR
GOTERM_CC_FAT	GO:0044429~mitochondrial part	35	6.61626	0.297021	ENSMUSG00000032026, ENSMUSG00000031278, ENSMUSG00000025150, ENSMUSG00000029455, ENSMUSG00000057880, ENSMUSG00000023030, ENSMUSG00000022186, ENSMUSG00000021591, ENSMUSG00000025037, ENSMUSG00000021692, ENSMUSG00000024782, ENSMUSG00000025810, ENSMUSG00000018796, ENSMUSG00000024646, ENSMUSG00000024900, ENSMUSG00000002416, ENSMUSG00000006818, ENSMUSG00000054676, ENSMUSG00000030861, ENSMUSG00000050335,…	488	1071	16939	1.13435	1	1	0.926959
GOTERM_CC_FAT	GO:0031967~organelle envelope	44	8.31758	0.306298	ENSMUSG00000032026, ENSMUSG00000031278, ENSMUSG00000029470, ENSMUSG00000060519, ENSMUSG00000023030, ENSMUSG00000033294, ENSMUSG00000021591, ENSMUSG00000025037, ENSMUSG00000054072, ENSMUSG00000024782, ENSMUSG00000025810, ENSMUSG00000020122, ENSMUSG00000029810, ENSMUSG00000018796, ENSMUSG00000024646, ENSMUSG00000024900, ENSMUSG00000019124, ENSMUSG00000002416, ENSMUSG00000006818, ENSMUSG00000021814,…	488	1379	16939	1.10753	1	1	0.926959
GOTERM_CC_FAT	GO:0031975~envelope	44	8.31758	0.310504	ENSMUSG00000032026, ENSMUSG00000031278, ENSMUSG00000029470, ENSMUSG00000060519, ENSMUSG00000023030, ENSMUSG00000033294, ENSMUSG00000021591, ENSMUSG00000025037, ENSMUSG00000054072, ENSMUSG00000024782, ENSMUSG00000025810, ENSMUSG00000020122, ENSMUSG00000029810, ENSMUSG00000018796, ENSMUSG00000024646, ENSMUSG00000024900, ENSMUSG00000019124, ENSMUSG00000002416, ENSMUSG00000006818, ENSMUSG00000021814,…	488	1380	16939	1.10673	1	1	0.926959
GOTERM_CC_FAT	GO:0005635~nuclear envelope	18	3.40265	0.354871	ENSMUSG00000029470, ENSMUSG00000056220, ENSMUSG00000051177, ENSMUSG00000060519, ENSMUSG00000033294, ENSMUSG00000054072, ENSMUSG00000033060, ENSMUSG00000057130, ENSMUSG00000020122, ENSMUSG00000029810, ENSMUSG00000019124, ENSMUSG00000021814, ENSMUSG00000037474, ENSMUSG00000020649, ENSMUSG00000031913, ENSMUSG00000029480, ENSMUSG00000047250, ENSMUSG00000035049	488	531	16939	1.17665	1	1	0.926959
GOTERM_CC_FAT	GO:0005740~mitochondrial envelope	26	4.91493	0.552176	ENSMUSG00000032026, ENSMUSG00000031278, ENSMUSG00000023030, ENSMUSG00000021591, ENSMUSG00000025037, ENSMUSG00000024782, ENSMUSG00000025810, ENSMUSG00000018796, ENSMUSG00000024646, ENSMUSG00000024900, ENSMUSG00000002416, ENSMUSG00000006818, ENSMUSG00000054676, ENSMUSG00000050335, ENSMUSG00000030246, ENSMUSG00000026172, ENSMUSG00000008540, ENSMUSG00000027187, ENSMUSG00000062908, ENSMUSG00000029802,…	488	879	16939	1.02672	1	1	0.926959
GOTERM_CC_FAT	GO:0031966~mitochondrial membrane	22	4.15879	0.741315	ENSMUSG00000026172, ENSMUSG00000031278, ENSMUSG00000008540, ENSMUSG00000062908, ENSMUSG00000023030, ENSMUSG00000025037, ENSMUSG00000029802, ENSMUSG00000025810, ENSMUSG00000029500, ENSMUSG00000024659, ENSMUSG00000018796, ENSMUSG00000024646, ENSMUSG00000024900, ENSMUSG00000002416, ENSMUSG00000021868, ENSMUSG00000006818, ENSMUSG00000046230, ENSMUSG00000010660, ENSMUSG00000054676, ENSMUSG00000050335,…	488	821	16939	0.930138	1	1	0.926959
Annotation Cluster 31	Enrichment Score: 0.37899849787832984
Category	Term	Count	%	PValue	Genes	List Total	Pop Hits	Pop Total	Fold Enrichment	Bonferroni	Benjamini	FDR
GOTERM_CC_FAT	GO:0000228~nuclear chromosome	14	2.6465	0.284656	ENSMUSG00000025395, ENSMUSG00000015937, ENSMUSG00000026037, ENSMUSG00000029505, ENSMUSG00000026134, ENSMUSG00000042029, ENSMUSG00000027635, ENSMUSG00000024824, ENSMUSG00000035021, ENSMUSG00000017548, ENSMUSG00000045482, ENSMUSG00000035024, ENSMUSG00000039994, ENSMUSG00000031697	488	375	16939	1.29588	1	0.991407	0.917775
GOTERM_CC_FAT	GO:0044454~nuclear chromosome part	10	1.89036	0.482627	ENSMUSG00000024824, ENSMUSG00000025395, ENSMUSG00000017548, ENSMUSG00000026037, ENSMUSG00000029505, ENSMUSG00000045482, ENSMUSG00000026134, ENSMUSG00000039994, ENSMUSG00000031697, ENSMUSG00000027635	488	296	16939	1.17267	1	1	0.926959
GOTERM_CC_FAT	GO:0032993~protein-DNA complex	9	1.70132	0.530973	ENSMUSG00000020962, ENSMUSG00000025395, ENSMUSG00000044927, ENSMUSG00000015937, ENSMUSG00000017548, ENSMUSG00000029505, ENSMUSG00000045482, ENSMUSG00000026134, ENSMUSG00000037820	488	276	16939	1.13188	1	1	0.926959
Annotation Cluster 32	Enrichment Score: 0.37304126574847285
Category	Term	Count	%	PValue	Genes	List Total	Pop Hits	Pop Total	Fold Enrichment	Bonferroni	Benjamini	FDR
GOTERM_CC_FAT	GO:0005783~endoplasmic reticulum	65	12.2873	0.20944	ENSMUSG00000031278, ENSMUSG00000029311, ENSMUSG00000017969, ENSMUSG00000060519, ENSMUSG00000041959, ENSMUSG00000028980, ENSMUSG00000023175, ENSMUSG00000054072, ENSMUSG00000024066, ENSMUSG00000001506, ENSMUSG00000024308, ENSMUSG00000046324, ENSMUSG00000069601, ENSMUSG00000040181, ENSMUSG00000051048, ENSMUSG00000014776, ENSMUSG00000047250, ENSMUSG00000054676, ENSMUSG00000029661, ENSMUSG00000029344,…	488	2012	16939	1.12138	1	0.814009	0.753552
GOTERM_CC_FAT	GO:0044432~endoplasmic reticulum part	41	7.75047	0.283959	ENSMUSG00000031278, ENSMUSG00000024087, ENSMUSG00000060519, ENSMUSG00000017969, ENSMUSG00000028980, ENSMUSG00000023175, ENSMUSG00000054072, ENSMUSG00000002732, ENSMUSG00000020122, ENSMUSG00000026623, ENSMUSG00000024308, ENSMUSG00000018796, ENSMUSG00000024646, ENSMUSG00000046324, ENSMUSG00000040181, ENSMUSG00000021814, ENSMUSG00000051048, ENSMUSG00000073411, ENSMUSG00000047250, ENSMUSG00000029223,…	488	1264	16939	1.12591	1	0.991407	0.917775
GOTERM_CC_FAT	GO:0005789~endoplasmic reticulum membrane	31	5.86011	0.691954	ENSMUSG00000031278, ENSMUSG00000024087, ENSMUSG00000017969, ENSMUSG00000023175, ENSMUSG00000054072, ENSMUSG00000020122, ENSMUSG00000026623, ENSMUSG00000024308, ENSMUSG00000018796, ENSMUSG00000024646, ENSMUSG00000046324, ENSMUSG00000040181, ENSMUSG00000021814, ENSMUSG00000073411, ENSMUSG00000047250, ENSMUSG00000029223, ENSMUSG00000060802, ENSMUSG00000032353, ENSMUSG00000008540, ENSMUSG00000078853,…	488	1124	16939	0.957334	1	1	0.926959
GOTERM_CC_FAT	GO:0042175~nuclear outer membrane-endoplasmic reticulum membrane network	31	5.86011	0.782425	ENSMUSG00000031278, ENSMUSG00000024087, ENSMUSG00000017969, ENSMUSG00000023175, ENSMUSG00000054072, ENSMUSG00000020122, ENSMUSG00000026623, ENSMUSG00000024308, ENSMUSG00000018796, ENSMUSG00000024646, ENSMUSG00000046324, ENSMUSG00000040181, ENSMUSG00000021814, ENSMUSG00000073411, ENSMUSG00000047250, ENSMUSG00000029223, ENSMUSG00000060802, ENSMUSG00000032353, ENSMUSG00000008540, ENSMUSG00000078853,…	488	1178	16939	0.913449	1	1	0.926959
Annotation Cluster 33	Enrichment Score: 0.34641957538397505
Category	Term	Count	%	PValue	Genes	List Total	Pop Hits	Pop Total	Fold Enrichment	Bonferroni	Benjamini	FDR
GOTERM_CC_FAT	GO:0044815~DNA packaging complex	7	1.32325	0.282833	ENSMUSG00000044927, ENSMUSG00000015937, ENSMUSG00000029505, ENSMUSG00000045482, ENSMUSG00000035024, ENSMUSG00000037820, ENSMUSG00000042029	488	154	16939	1.57778	1	0.991407	0.917775
GOTERM_CC_FAT	GO:0032993~protein-DNA complex	9	1.70132	0.530973	ENSMUSG00000020962, ENSMUSG00000025395, ENSMUSG00000044927, ENSMUSG00000015937, ENSMUSG00000017548, ENSMUSG00000029505, ENSMUSG00000045482, ENSMUSG00000026134, ENSMUSG00000037820	488	276	16939	1.13188	1	1	0.926959
GOTERM_CC_FAT	GO:0000786~nucleosome	5	0.94518	0.608331	ENSMUSG00000044927, ENSMUSG00000015937, ENSMUSG00000029505, ENSMUSG00000045482, ENSMUSG00000037820	488	146	16939	1.18874	1	1	0.926959
Annotation Cluster 34	Enrichment Score: 0.3086071168736549
Category	Term	Count	%	PValue	Genes	List Total	Pop Hits	Pop Total	Fold Enrichment	Bonferroni	Benjamini	FDR
GOTERM_CC_FAT	GO:0005741~mitochondrial outer membrane	10	1.89036	0.135346	ENSMUSG00000031278, ENSMUSG00000018796, ENSMUSG00000024646, ENSMUSG00000024900, ENSMUSG00000008540, ENSMUSG00000023030, ENSMUSG00000046230, ENSMUSG00000025037, ENSMUSG00000029500, ENSMUSG00000019832	488	204	16939	1.70152	1	0.656051	0.607326
GOTERM_CC_FAT	GO:0019867~outer membrane	10	1.89036	0.354783	ENSMUSG00000031278, ENSMUSG00000018796, ENSMUSG00000024646, ENSMUSG00000024900, ENSMUSG00000008540, ENSMUSG00000023030, ENSMUSG00000046230, ENSMUSG00000025037, ENSMUSG00000029500, ENSMUSG00000019832	488	265	16939	1.30985	1	1	0.926959
GOTERM_CC_FAT	GO:0031968~organelle outer membrane	10	1.89036	0.354783	ENSMUSG00000031278, ENSMUSG00000018796, ENSMUSG00000024646, ENSMUSG00000024900, ENSMUSG00000008540, ENSMUSG00000023030, ENSMUSG00000046230, ENSMUSG00000025037, ENSMUSG00000029500, ENSMUSG00000019832	488	265	16939	1.30985	1	1	0.926959
GOTERM_CC_FAT	GO:0005740~mitochondrial envelope	26	4.91493	0.552176	ENSMUSG00000032026, ENSMUSG00000031278, ENSMUSG00000023030, ENSMUSG00000021591, ENSMUSG00000025037, ENSMUSG00000024782, ENSMUSG00000025810, ENSMUSG00000018796, ENSMUSG00000024646, ENSMUSG00000024900, ENSMUSG00000002416, ENSMUSG00000006818, ENSMUSG00000054676, ENSMUSG00000050335, ENSMUSG00000030246, ENSMUSG00000026172, ENSMUSG00000008540, ENSMUSG00000027187, ENSMUSG00000062908, ENSMUSG00000029802,…	488	879	16939	1.02672	1	1	0.926959
GOTERM_CC_FAT	GO:0031966~mitochondrial membrane	22	4.15879	0.741315	ENSMUSG00000026172, ENSMUSG00000031278, ENSMUSG00000008540, ENSMUSG00000062908, ENSMUSG00000023030, ENSMUSG00000025037, ENSMUSG00000029802, ENSMUSG00000025810, ENSMUSG00000029500, ENSMUSG00000024659, ENSMUSG00000018796, ENSMUSG00000024646, ENSMUSG00000024900, ENSMUSG00000002416, ENSMUSG00000021868, ENSMUSG00000006818, ENSMUSG00000046230, ENSMUSG00000010660, ENSMUSG00000054676, ENSMUSG00000050335,…	488	821	16939	0.930138	1	1	0.926959
GOTERM_CC_FAT	GO:0005743~mitochondrial inner membrane	9	1.70132	0.994327	ENSMUSG00000026172, ENSMUSG00000024900, ENSMUSG00000008540, ENSMUSG00000002416, ENSMUSG00000006818, ENSMUSG00000021868, ENSMUSG00000029500, ENSMUSG00000050335, ENSMUSG00000030246	488	578	16939	0.540484	1	1	0.994327
GOTERM_CC_FAT	GO:0019866~organelle inner membrane	10	1.89036	0.99717	ENSMUSG00000026172, ENSMUSG00000024900, ENSMUSG00000029470, ENSMUSG00000008540, ENSMUSG00000002416, ENSMUSG00000006818, ENSMUSG00000021868, ENSMUSG00000029500, ENSMUSG00000050335, ENSMUSG00000030246	488	665	16939	0.521971	1	1	0.99717
Annotation Cluster 35	Enrichment Score: 0.252343392450721
Category	Term	Count	%	PValue	Genes	List Total	Pop Hits	Pop Total	Fold Enrichment	Bonferroni	Benjamini	FDR
GOTERM_CC_FAT	GO:0001750~photoreceptor outer segment	5	0.94518	0.285279	ENSMUSG00000021614, ENSMUSG00000027254, ENSMUSG00000023175, ENSMUSG00000047250, ENSMUSG00000019889	488	94	16939	1.84633	1	0.991407	0.917775
GOTERM_CC_FAT	GO:0097733~photoreceptor cell cilium	5	0.94518	0.485754	ENSMUSG00000021614, ENSMUSG00000027254, ENSMUSG00000023175, ENSMUSG00000047250, ENSMUSG00000019889	488	125	16939	1.38844	1	1	0.926959
GOTERM_CC_FAT	GO:0097731~9+0 non-motile cilium	5	0.94518	0.569439	ENSMUSG00000021614, ENSMUSG00000027254, ENSMUSG00000023175, ENSMUSG00000047250, ENSMUSG00000019889	488	139	16939	1.2486	1	1	0.926959
GOTERM_CC_FAT	GO:0097730~non-motile cilium	5	0.94518	0.756701	ENSMUSG00000021614, ENSMUSG00000027254, ENSMUSG00000023175, ENSMUSG00000047250, ENSMUSG00000019889	488	178	16939	0.97503	1	1	0.926959
GOTERM_CC_FAT	GO:0044441~ciliary part	13	2.45747	0.916696	ENSMUSG00000026463, ENSMUSG00000052397, ENSMUSG00000027254, ENSMUSG00000058230, ENSMUSG00000023175, ENSMUSG00000026966, ENSMUSG00000047547, ENSMUSG00000020733, ENSMUSG00000021614, ENSMUSG00000029070, ENSMUSG00000046230, ENSMUSG00000047250, ENSMUSG00000019889	488	586	16939	0.770041	1	1	0.926959
Annotation Cluster 36	Enrichment Score: 0.2455385476051257
Category	Term	Count	%	PValue	Genes	List Total	Pop Hits	Pop Total	Fold Enrichment	Bonferroni	Benjamini	FDR
GOTERM_CC_FAT	GO:0098794~postsynapse	29	5.48204	0.352692	ENSMUSG00000029470, ENSMUSG00000027254, ENSMUSG00000004931, ENSMUSG00000027797, ENSMUSG00000032060, ENSMUSG00000025810, ENSMUSG00000024304, ENSMUSG00000004951, ENSMUSG00000025555, ENSMUSG00000043079, ENSMUSG00000001507, ENSMUSG00000024789, ENSMUSG00000069601, ENSMUSG00000098557, ENSMUSG00000047454, ENSMUSG00000031996, ENSMUSG00000028273, ENSMUSG00000029761, ENSMUSG00000051177, ENSMUSG00000047547,…	488	900	16939	1.11847	1	1	0.926959
GOTERM_CC_FAT	GO:0097060~synaptic membrane	17	3.21361	0.432938	ENSMUSG00000026463, ENSMUSG00000032060, ENSMUSG00000025810, ENSMUSG00000024304, ENSMUSG00000004951, ENSMUSG00000025555, ENSMUSG00000047547, ENSMUSG00000024659, ENSMUSG00000025969, ENSMUSG00000001507, ENSMUSG00000069601, ENSMUSG00000047368, ENSMUSG00000098557, ENSMUSG00000047454, ENSMUSG00000037852, ENSMUSG00000031007, ENSMUSG00000017314	488	525	16939	1.12398	1	1	0.926959
GOTERM_CC_FAT	GO:0045211~postsynaptic membrane	12	2.26843	0.442641	ENSMUSG00000001507, ENSMUSG00000025969, ENSMUSG00000069601, ENSMUSG00000047368, ENSMUSG00000098557, ENSMUSG00000047454, ENSMUSG00000025810, ENSMUSG00000024304, ENSMUSG00000031007, ENSMUSG00000004951, ENSMUSG00000025555, ENSMUSG00000017314	488	354	16939	1.17665	1	1	0.926959
GOTERM_CC_FAT	GO:0045202~synapse	53	10.0189	0.457956	ENSMUSG00000031673, ENSMUSG00000054277, ENSMUSG00000029470, ENSMUSG00000027254, ENSMUSG00000004931, ENSMUSG00000024304, ENSMUSG00000028868, ENSMUSG00000025555, ENSMUSG00000040466, ENSMUSG00000026249, ENSMUSG00000001507, ENSMUSG00000024789, ENSMUSG00000069601, ENSMUSG00000047454, ENSMUSG00000034220, ENSMUSG00000052698, ENSMUSG00000037852, ENSMUSG00000031996, ENSMUSG00000051177, ENSMUSG00000022995,…	488	1766	16939	1.04173	1	1	0.926959
GOTERM_CC_FAT	GO:0098978~glutamatergic synapse	20	3.78072	0.529768	ENSMUSG00000031673, ENSMUSG00000029761, ENSMUSG00000026463, ENSMUSG00000051177, ENSMUSG00000005533, ENSMUSG00000025810, ENSMUSG00000024304, ENSMUSG00000025555, ENSMUSG00000005125, ENSMUSG00000043079, ENSMUSG00000041781, ENSMUSG00000025969, ENSMUSG00000001507, ENSMUSG00000027805, ENSMUSG00000024789, ENSMUSG00000047368, ENSMUSG00000020716, ENSMUSG00000057738, ENSMUSG00000037643, ENSMUSG00000017314	488	657	16939	1.05665	1	1	0.926959
GOTERM_CC_FAT	GO:0014069~postsynaptic density	13	2.45747	0.663864	ENSMUSG00000028273, ENSMUSG00000029470, ENSMUSG00000027254, ENSMUSG00000027797, ENSMUSG00000032060, ENSMUSG00000024304, ENSMUSG00000004951, ENSMUSG00000043079, ENSMUSG00000021820, ENSMUSG00000047368, ENSMUSG00000047454, ENSMUSG00000020716, ENSMUSG00000017314	488	456	16939	0.98957	1	1	0.926959
GOTERM_CC_FAT	GO:0032279~asymmetric synapse	13	2.45747	0.681171	ENSMUSG00000028273, ENSMUSG00000029470, ENSMUSG00000027254, ENSMUSG00000027797, ENSMUSG00000032060, ENSMUSG00000024304, ENSMUSG00000004951, ENSMUSG00000043079, ENSMUSG00000021820, ENSMUSG00000047368, ENSMUSG00000047454, ENSMUSG00000020716, ENSMUSG00000017314	488	462	16939	0.976718	1	1	0.926959
GOTERM_CC_FAT	GO:0099634~postsynaptic specialization membrane	5	0.94518	0.69789	ENSMUSG00000047368, ENSMUSG00000047454, ENSMUSG00000024304, ENSMUSG00000004951, ENSMUSG00000017314	488	164	16939	1.05826	1	1	0.926959
GOTERM_CC_FAT	GO:0098984~neuron to neuron synapse	13	2.45747	0.700696	ENSMUSG00000028273, ENSMUSG00000029470, ENSMUSG00000027254, ENSMUSG00000027797, ENSMUSG00000032060, ENSMUSG00000024304, ENSMUSG00000004951, ENSMUSG00000043079, ENSMUSG00000021820, ENSMUSG00000047368, ENSMUSG00000047454, ENSMUSG00000020716, ENSMUSG00000017314	488	469	16939	0.96214	1	1	0.926959
GOTERM_CC_FAT	GO:0044456~synapse part	37	6.99433	0.707772	ENSMUSG00000054277, ENSMUSG00000029470, ENSMUSG00000026463, ENSMUSG00000027254, ENSMUSG00000004931, ENSMUSG00000027797, ENSMUSG00000032060, ENSMUSG00000025810, ENSMUSG00000024304, ENSMUSG00000004951, ENSMUSG00000025555, ENSMUSG00000040466, ENSMUSG00000043079, ENSMUSG00000001507, ENSMUSG00000024789, ENSMUSG00000069601, ENSMUSG00000019124, ENSMUSG00000098557, ENSMUSG00000047454, ENSMUSG00000037852,…	488	1350	16939	0.95134	1	1	0.926959
GOTERM_CC_FAT	GO:0099572~postsynaptic specialization	13	2.45747	0.775797	ENSMUSG00000028273, ENSMUSG00000029470, ENSMUSG00000027254, ENSMUSG00000027797, ENSMUSG00000032060, ENSMUSG00000024304, ENSMUSG00000004951, ENSMUSG00000043079, ENSMUSG00000021820, ENSMUSG00000047368, ENSMUSG00000047454, ENSMUSG00000020716, ENSMUSG00000017314	488	499	16939	0.904296	1	1	0.926959
Annotation Cluster 37	Enrichment Score: 0.13789936183950416
Category	Term	Count	%	PValue	Genes	List Total	Pop Hits	Pop Total	Fold Enrichment	Bonferroni	Benjamini	FDR
GOTERM_CC_FAT	GO:0048787~presynaptic active zone membrane	3	0.567108	0.58606	ENSMUSG00000001507, ENSMUSG00000026463, ENSMUSG00000024304	488	68	16939	1.53137	1	1	0.926959
GOTERM_CC_FAT	GO:0048786~presynaptic active zone	4	0.756144	0.706421	ENSMUSG00000001507, ENSMUSG00000054277, ENSMUSG00000026463, ENSMUSG00000024304	488	126	16939	1.10194	1	1	0.926959
GOTERM_CC_FAT	GO:0042734~presynaptic membrane	5	0.94518	0.931744	ENSMUSG00000047547, ENSMUSG00000001507, ENSMUSG00000098557, ENSMUSG00000026463, ENSMUSG00000024304	488	250	16939	0.694221	1	1	0.931744
Annotation Cluster 38	Enrichment Score: 0.11222964722319248
Category	Term	Count	%	PValue	Genes	List Total	Pop Hits	Pop Total	Fold Enrichment	Bonferroni	Benjamini	FDR
GOTERM_CC_FAT	GO:0099634~postsynaptic specialization membrane	5	0.94518	0.69789	ENSMUSG00000047368, ENSMUSG00000047454, ENSMUSG00000024304, ENSMUSG00000004951, ENSMUSG00000017314	488	164	16939	1.05826	1	1	0.926959
GOTERM_CC_FAT	GO:0098936~intrinsic component of postsynaptic membrane	5	0.94518	0.779044	ENSMUSG00000025969, ENSMUSG00000047368, ENSMUSG00000025810, ENSMUSG00000024304, ENSMUSG00000017314	488	184	16939	0.943235	1	1	0.926959
GOTERM_CC_FAT	GO:0098948~intrinsic component of postsynaptic specialization membrane	3	0.567108	0.847153	ENSMUSG00000047368, ENSMUSG00000024304, ENSMUSG00000017314	488	115	16939	0.905506	1	1	0.926959
Annotation Cluster 39	Enrichment Score: 0.04404393217996166
Category	Term	Count	%	PValue	Genes	List Total	Pop Hits	Pop Total	Fold Enrichment	Bonferroni	Benjamini	FDR
GOTERM_CC_FAT	GO:0015630~microtubule cytoskeleton	38	7.18336	0.774545	ENSMUSG00000036768, ENSMUSG00000052397, ENSMUSG00000027254, ENSMUSG00000058672, ENSMUSG00000074364, ENSMUSG00000058230, ENSMUSG00000032060, ENSMUSG00000025337, ENSMUSG00000041498, ENSMUSG00000026966, ENSMUSG00000004951, ENSMUSG00000005125, ENSMUSG00000018474, ENSMUSG00000039450, ENSMUSG00000037474, ENSMUSG00000022629, ENSMUSG00000038047, ENSMUSG00000031913, ENSMUSG00000020608, ENSMUSG00000034218,…	488	1430	16939	0.922392	1	1	0.926959
GOTERM_CC_FAT	GO:0005815~microtubule organizing center	18	3.40265	0.973801	ENSMUSG00000034218, ENSMUSG00000016528, ENSMUSG00000033088, ENSMUSG00000052397, ENSMUSG00000015937, ENSMUSG00000058230, ENSMUSG00000026037, ENSMUSG00000022476, ENSMUSG00000026966, ENSMUSG00000041840, ENSMUSG00000005125, ENSMUSG00000025006, ENSMUSG00000018474, ENSMUSG00000037474, ENSMUSG00000037321, ENSMUSG00000038047, ENSMUSG00000031913, ENSMUSG00000010067	488	886	16939	0.705191	1	1	0.973801
GOTERM_CC_FAT	GO:0005813~centrosome	14	2.6465	0.978028	ENSMUSG00000034218, ENSMUSG00000016528, ENSMUSG00000015937, ENSMUSG00000026037, ENSMUSG00000022476, ENSMUSG00000026966, ENSMUSG00000041840, ENSMUSG00000005125, ENSMUSG00000025006, ENSMUSG00000018474, ENSMUSG00000037474, ENSMUSG00000037321, ENSMUSG00000038047, ENSMUSG00000031913	488	727	16939	0.668439	1	1	0.978028
Annotation Cluster 40	Enrichment Score: 0.027475422875435872
Category	Term	Count	%	PValue	Genes	List Total	Pop Hits	Pop Total	Fold Enrichment	Bonferroni	Benjamini	FDR
GOTERM_CC_FAT	GO:0036126~sperm flagellum	4	0.756144	0.906253	ENSMUSG00000020733, ENSMUSG00000026463, ENSMUSG00000046230, ENSMUSG00000026576	488	186	16939	0.746475	1	1	0.926959
GOTERM_CC_FAT	GO:0031514~motile cilium	6	1.13422	0.928147	ENSMUSG00000024659, ENSMUSG00000020733, ENSMUSG00000026463, ENSMUSG00000046230, ENSMUSG00000026576, ENSMUSG00000026966	488	294	16939	0.708389	1	1	0.928147
GOTERM_CC_FAT	GO:0097729~9+2 motile cilium	4	0.756144	0.938233	ENSMUSG00000020733, ENSMUSG00000026463, ENSMUSG00000046230, ENSMUSG00000026576	488	206	16939	0.674001	1	1	0.938233
GOTERM_CC_FAT	GO:0097223~sperm part	6	1.13422	0.983834	ENSMUSG00000033487, ENSMUSG00000020733, ENSMUSG00000026463, ENSMUSG00000046230, ENSMUSG00000023175, ENSMUSG00000026576	488	373	16939	0.558355	1	1	0.983834
Annotation Cluster 41	Enrichment Score: 0.012297979334527871
Category	Term	Count	%	PValue	Genes	List Total	Pop Hits	Pop Total	Fold Enrichment	Bonferroni	Benjamini	FDR
GOTERM_CC_FAT	GO:0030672~synaptic vesicle membrane	3	0.567108	0.945567	ENSMUSG00000047547, ENSMUSG00000031007, ENSMUSG00000053291	488	159	16939	0.654926	1	1	0.945567
GOTERM_CC_FAT	GO:0099501~exocytic vesicle membrane	3	0.567108	0.945567	ENSMUSG00000047547, ENSMUSG00000031007, ENSMUSG00000053291	488	159	16939	0.654926	1	1	0.945567
GOTERM_CC_FAT	GO:0030658~transport vesicle membrane	4	0.756144	0.965586	ENSMUSG00000047547, ENSMUSG00000037852, ENSMUSG00000031007, ENSMUSG00000053291	488	233	16939	0.595898	1	1	0.965586
GOTERM_CC_FAT	GO:0008021~synaptic vesicle	4	0.756144	0.987296	ENSMUSG00000047547, ENSMUSG00000027820, ENSMUSG00000031007, ENSMUSG00000053291	488	277	16939	0.501243	1	1	0.987296
GOTERM_CC_FAT	GO:0070382~exocytic vesicle	4	0.756144	0.992227	ENSMUSG00000047547, ENSMUSG00000027820, ENSMUSG00000031007, ENSMUSG00000053291	488	298	16939	0.46592	1	1	0.992227
GOTERM_CC_FAT	GO:0030133~transport vesicle	6	1.13422	0.997649	ENSMUSG00000047547, ENSMUSG00000032353, ENSMUSG00000027820, ENSMUSG00000037852, ENSMUSG00000031007, ENSMUSG00000053291	488	465	16939	0.447885	1	1	0.997649
