# Supplementary material for: Ezrin defines TSC complex activation at endosomal compartments through EGFR–AKT signaling
Source: eLife. 2025 Feb 12;13:RP98523. doi: 10.7554/eLife.98523 (PMC11820125; doi:10.7554/eLife.98523)
Supplement: Supplementary file 4. [file elife-98523-supp4.xlsx]

## Sheet: SILAC_Phosphoproteomics
Term	Overlap	P-value	Adjusted P-value	Old P-value	Old Adjusted P-value	Odds Ratio	Combined Score	Genes
down 0min EGF vs ctrl HeLa (Human) [17081983]	239/1243	2.09424e-06	7.6572e-05	0	0	1.43113	18.714	POP1;DCAF8;FNBP1L;MKI67;ANTXR1;HERC2;MPRIP;DHX57;CREB3L2;AKT1;KIF21A;SYNPO;JUNB;SMARCC2;CTPS;FNDC3A;BCR;PRKAR1A;MAP1A;KCTD12;KIF20A;TLN2;MACF1;CDCA2;FLII;MYCBP2;BAZ2B;ADAMTS12;HTATSF1;FXR1;PTDSS1;HSPH1;RACGAP1;EPB41L3;PCBP2;SSR1;DECR2;S100A11;SEC31A;HEXIM1;LYN;TNFSF12;FN1;XRCC1;GNG12;SMARCA2;LARP6;SMARCA4;FOSL2;EHD2;PPFIBP1;WNK1;FAT1;CALU;PDE3A;MAGED2;PAM;CDS2;PHF3;TOP2B;SH3KBP1;RPLP1;CETN2;TGFB1…
up 0min EGF vs ctrl HeLa (Human) [17081983]	177/876	2.23193e-06	7.6572e-05	0	0	1.51608	19.7281	POP1;NAB1;TUSC1;CTNND1;INPPL1;GPATCH2;IRS2;CBLB;PHRF1;MKI67;DCAF6;EEF1B2;FAM122B;HERC2;MPRIP;RPL18A;DHX57;PSMD1;KIF21A;PRKACA;SLC16A2;SYNPO;TLE4;SMARCC2;ARID5B;LMO7;CTPS;FNDC3A;PIAS1;BCR;ACLY;PRKAR1A;SUB1;MAP1A;ERF;VDAC1;TLN1;VCL;SKAP2;RAI14;RTN3;MACF1;NUMBL;NDRG3;FLII;MYCBP2;ITPR3;BAZ2B;HTATSF1;RTN4;FXR1;NUAK1;HSPH1;CALD1;EPB41L3;PCBP2;DECR2;SRGAP1;SEC31A;BCL9L;ZFHX3;ACBD5;OSBPL5;ST13;CEP350;GFP…
up 10min EGF vs ctrl HeLa (Human) [17081983]	204/1038	2.73471e-06	7.6572e-05	0	0	1.4669	18.7903	CBLB;FNBP1L;MKI67;FAM122B;HERC2;MPRIP;DHX57;CREB3L2;AKT1;PSMD1;KIF21A;SYNPO;SMARCC2;CTPS;FNDC3A;BCR;PRKAR1A;SUB1;MAP1A;VDAC1;KCTD12;TLN1;SKAP2;MACF1;NUMBL;CDCA2;FLII;MYCBP2;BAZ2B;HTATSF1;MTMR6;FXR1;NUAK1;HSPH1;EPB41L3;DECR2;SEC31A;LYN;ST13;XRCC1;GNG12;SMARCA2;EHD1;EHD2;PPFIBP1;RPS27;WNK1;MAGED2;FERMT2;CDS2;PHF3;TOP2B;SH3KBP1;RPLP1;CETN2;TGFB1I1;SRA1;JPH1;ROBO1;AKAP12;AKAP13;TNKS1BP1;SEC61B;EMD;CA…
up Rapamycin vs Ctrl Exp2 MEFs (Mouse) [21659605]	170/844	4.30294e-06	9.03618e-05	0	0	1.50857	18.6403	EHMT2;ZMYND8;NAB2;CTNND1;RAPH1;IRS2;MKI67;SLC4A4;EEF1B2;MPRIP;RPL18A;DPYSL2;AKT1;MAF1;SYNPO;GTSE1;JUNB;EPHB3;IER3;MEF2A;CAST;SMARCC2;UBE2E3;LMO7;CTPS;FNDC3A;TANC2;BCR;ACLY;TIAM1;CACNB3;ERF;ANAPC4;RIN2;PHLDB2;VCL;LLGL1;MACF1;NDRG3;CDCA3;FAM114A1;MYCBP2;CTR9;ARHGAP18;ITPR3;HTATSF1;RTN4;FXR1;SLC9A3R1;PTDSS1;ATXN1;PRKAR2B;CALD1;BAG3;PCBP2;NACC1;SSR1;RAB11FIP2;SRGAP1;SEC31A;BCL9L;PDHA1;NCAPH2;PLK1;FN1…
up 10min PPase inhibitors vs ctrl Hepa1-6 (Mouse) [18846507]	212/1098	6.05845e-06	0.000101782	0	0	1.4346	17.2354	IFITM3;RPL30;PID1;IFITM2;ZMYND8;FNBP1L;MKI67;1110038F14RIK;SLC4A4;RPL7;RPS6KA4;DPYSL2;AKT1;KIF21A;KIFAP3;SYNPO;GTSE1;SMARCC2;BCR;NUP93;SUB1;MXRA8;TAGLN2;KIF20A;RIN2;UBA52;CDCA2;CDCA3;SDC2;ZFP503;CTR9;SLAIN2;HTATSF1;FXR1;HMGXB4;RACGAP1;PCBP2;SNX7;VTI1B;PBX2;SMARCA4;FOSL2;CYLD;TPX2;CCDC88A;PPFIBP1;SMTN;WNK1;GOLGB1;FAT1;RPS20;CALM2;TRAM1;SH3KBP1;SRA1;MIA3;PPP1R18;TRIOBP;AKAP13;TUBA1B;TRIM2;SH3PXD2B;…
down Rapamycin vs Ctrl Exp2 MEFs (Mouse) [21659605]	132/649	3.11956e-05	0.000436738	0	0	1.52063	15.7769	EHMT2;ZMYND8;FHOD1;CTNND1;RAPH1;IRS2;MKI67;PHRF1;ACTB;FAM122B;RPS6KA4;EEF1B2;HELB;MPRIP;DPYSL2;SYNPO;JUNB;IER3;MEF2A;CAST;SMARCC2;PTOV1;LMO7;ZCRB1;CTPS;FOXP1;ERF;TLN1;PHLDB2;RIN2;ZCCHC6;VCP;FAM114A1;MYCBP2;FOXO3;RTN4;FXR1;SSR1;CDR2;SEC31A;BCL9L;CAML;PBX2;ARHGAP29;EEF2;LARP6;PBX1;CLK3;FOSL2;SMARCA4;CCDC88A;PPFIBP1;DAB2;NACA;AAK1;PHF14;SKIV2L;TOP2B;MAST4;RPLP1;HSPB8;DOCK7;LSP1;CHD3;LYST;LMNB1;SMPD3…
up 60min BMP4 vs ctrl hESC (Human) [19664995]	46/179	6.30863e-05	0.000678183	0	0	2.04444	19.7718	MACF1;AHNAK;FLII;RPLP1;PALM2;NAB2;DUSP19;RRBP1;YBX1;ADD1;WDR44;AKAP12;PDLIM2;CALD1;BAG3;RNPEP;LMNA;SPP1;TNKS1BP1;FAM83D;JARID2;CDR2;EIF4B;BCL9L;TLE4;FNBP1;MKL1;DYRK1B;PAWR;SORBS1;BAIAP2;SORBS3;DCLK1;SMARCA4;ENAH;CLIP2;BCL9;SMTN;MARCKS;CTTN;EEF1D;CCDC8;AAK1;SKIV2L;MYL9;ARHGEF5
down 10min EGF vs ctrl HeLa (Human) [17081983]	206/1102	6.45888e-05	0.000678183	0	0	1.37454	13.2608	POP1;GPATCH2;DCAF8;MKI67;ANTXR1;DCAF6;HERC2;MPRIP;RPL18A;DHX57;KIF21A;SYNPO;JUNB;SMARCC2;BCR;PRKAR1A;MAP1A;KIF20A;TLN2;MACF1;NUMBL;FLII;MYCBP2;BAZ2B;ADAMTS12;HTATSF1;FXR1;PTDSS1;HSPH1;RACGAP1;PCBP2;SSR1;DECR2;SEC31A;HEXIM1;ST13;TNFSF12;FN1;GNG12;SMARCA2;LARP6;SMARCA4;FOSL2;EHD2;PPFIBP1;WNK1;FAT1;CALU;PDE3A;MAGED2;PAM;CDS2;PHF3;TOP2B;TRAM1;SH3KBP1;RPLP1;TGFB1I1;KIF14;MIA3;JPH1;TRIOBP;WDR44;ROBO1;A…
down 20min EGF vs ctrl HeLa (Human) [17081983]	205/1103	9.49774e-05	0.000886456	0	0	1.36415	12.6346	POP1;MKI67;ANTXR1;MPRIP;DHX57;CREB3L2;PRKACA;SYNPO;JUNB;CTPS;FNDC3A;SCAMP3;PRKAR1A;MAP1A;VDAC1;KIF20A;TLN2;MACF1;CDCA3;FLII;MYCBP2;IQGAP1;HTATSF1;FXR1;PTDSS1;HSPH1;RACGAP1;PCBP2;DECR2;S100A11;SEC31A;LYN;ST13;TNFSF12;PARVA;GNG12;SMARCA2;LARP6;SMARCA4;FOSL2;EHD2;CYLD;TPX2;PPFIBP1;WNK1;FAT1;PDE3A;MAGED2;PAM;CDS2;PHF3;TOP2B;TRAM1;SH3KBP1;RPLP1;CETN2;TGFB1I1;KIF14;WDR44;ROBO1;AKAP12;TUBA1C;AKAP13;MECO…
down 1min EGF vs ctrl HeLa (Human) [17081983]	221/1209	0.00014242	0.00119633	0	0	1.33712	11.8425	DCAF8;MKI67;ANTXR1;HERC2;MPRIP;DHX57;PRKACA;SYNPO;TBC1D22A;JUNB;SMARCC2;CTPS;FNDC3A;SCAMP3;PRKAR1A;MAP1A;VDAC1;KCTD12;KIF20A;TLN2;TLN1;MACF1;NUMBL;CDCA2;CDCA3;FLII;MYCBP2;IQGAP1;HTATSF1;FXR1;PTDSS1;HSPH1;RACGAP1;PCBP2;DECR2;S100A11;SEC31A;LYN;ST13;TNFSF12;GNG12;SMARCA2;LARP6;SMARCA4;FOSL2;EHD2;CYLD;PPFIBP1;WNK1;FAT1;PDE3A;MAGED2;PAM;FERMT2;PHF3;TOP2B;TRAM1;SH3KBP1;RPLP1;CETN2;TGFB1I1;KIF14;WDR44;…
up starvation PTP1B KO vs wt MEF (Mouse) [18515860]	16/43	0.000207441	0.0015841	0	0	3.48828	29.5829	PDGFRB;EPHA4;SHC1;TGFB1I1;CTNND1;NEDD9;LPP;EGFR;GJA1;SH3PXD2A;CTTN;ST5;MAP2K7;MAPK3;EPHB3;FGFR1
up Rapamycin vs Ctrl Exp1 MEFs (Mouse) [21659605]	157/837	0.000399681	0.00279777	0	0	1.3739	10.7506	ZMYND8;NAB2;CTNND1;HJURP;IRS2;FNBP1L;IPO5;EEF1B2;RPS6KA4;DPYSL2;CFL1;ARHGDIB;AKT1;PRKACA;SYNPO;CAST;TPM1;TBC1D2B;LMO7;CTPS;PDIA6;IL6ST;TLN1;PHLDB2;VCL;LLGL1;MACF1;MYCBP2;TWF1;ARHGAP18;ITPR3;HTATSF1;RTN4;FXR1;SLC9A3R1;RACGAP1;CALD1;BAG3;SSR1;SRGAP3;QSER1;SEC31A;KLHDC4;ACBD5;PDHA1;OSBPL3;CEP350;FN1;XRCC1;HMGA2;SMARCA4;FOSL2;EHD2;CCDC88A;PPFIBP1;NACA;WNK1;GOLGB1;AAK1;PHF14;FERMT2;PHF3;TOP2B;TRAM1;CH…
down Rapamycin vs Ctrl Exp1 MEFs (Mouse) [21659605]	123/637	0.000531538	0.00343455	0	0	1.42088	10.7131	FAM13C;EHMT2;ZMYND8;CTNND1;NAB2;HDLBP;IRS2;FNBP1L;1110038F14RIK;SLC4A4;CCDC102A;EEF1B2;MPRIP;EME1;PRKACA;FNDC3A;UTRN;PHLDB2;VCL;MACF1;ZCCHC6;PFKFB3;NDRG3;FAM114A1;MYCBP2;STK39;ARPP19;RTN4;FXR1;FAM171A1;SLC9A3R1;RACGAP1;PRKAR2B;BAG3;NACC1;PCBP2;AP1M1;SEC31A;CEP350;PLK1;ARHGAP29;HMGA2;PARVA;SMARCA4;CCDC88A;PPFIBP1;DAB2;DAP;NACA;WNK1;DLG5;AAK1;FERMT2;PHF3;TOP2B;HSP90AB1;NUMA1;MAST4;RPLP1;SNAP23;DOCK…
up basal PTP1B KO vs wt MEF (Mouse) [18515860]	17/52	0.000770398	0.00447175	0	0	2.85879	20.4935	ITGB1;PDGFRB;EPHA4;SHC1;TGFB1I1;CTNND1;NEDD9;LPP;EGFR;IGF1R;GJA1;FCHSD2;SH3PXD2A;CTTN;ST5;LDLR;FERMT2
up 20min EGF vs ctrl HeLa (Human) [17081983]	173/948	0.000798528	0.00447175	0	0	1.32836	9.47485	NAB1;TUSC1;CTNND1;INPPL1;DCAF8;IRS2;PHRF1;MKI67;EEF1B2;HERC2;MPRIP;CREB3L2;SYNPO;TBC1D22A;JUNB;HMGN3;CAST;SMARCC2;ZBTB38;LMO7;FNDC3A;PDIA6;PRKAR1A;MAP1A;ERF;VDAC1;KCTD12;IL6ST;TLN1;VCL;RAI14;MACF1;COPB2;NUMBL;SLC26A2;CDCA2;KHDRBS3;TTYH2;FAM114A1;TSHZ3;SHC1;NPR3;HTATSF1;LPP;UQCRH;RTN4;FXR1;SLC9A3R1;HSPH1;CALD1;BAG3;PCBP2;HLTF;DECR2;QSER1;SEC31A;BCL9L;IVNS1ABP;OSBPL5;CAV2;CEP350;GFPT1;XRCC1;ARHGAP2…
up 1min EGF vs ctrl HeLa (Human) [17081983]	145/787	0.00139094	0.00697367	0	0	1.34127	8.8226	POP1;TUSC1;CTNND1;INPPL1;PHRF1;MKI67;MPRIP;DHX57;SCMH1;CREB3L2;SYNPO;JUNB;HMGN3;SMARCC2;ZBTB38;ECH1;LMO7;FNDC3A;MAP1A;ERF;VDAC1;KIF20A;TLN2;IL6ST;TLN1;VCL;RAI14;MACF1;NUMBL;SLC26A2;KHDRBS3;TTYH2;TSHZ3;SHC1;NPR3;HTATSF1;RTN4;SLC9A3R1;CALD1;PCBP2;HLTF;DECR2;SRGAP1;QSER1;SEC31A;IVNS1ABP;OSBPL5;CAV2;ST13;CEP350;GFPT1;XRCC1;PARVA;SMARCA2;CLK3;SMARCA4;FOSL2;TPX2;DAB2;RPS27;WNK1;PHF14;MAGED2;FERMT2;CDS2…
up 30min BMP4 vs ctrl hESC (Human) [19664995]	33/134	0.00141134	0.00697367	0	0	1.92626	12.6425	LRSAM1;AHNAK;DDX47;RPLP1;PALM2;HSPB1;ADD1;LMNB1;EEF1B2;AKAP12;TUBA1C;LASP1;SALL2;LMNA;TNKS1BP1;FLNA;RUNX1T1;PCYT1A;DYRK1B;SORBS1;PTPN14;SORBS3;DCLK1;PJA1;ENAH;BCL9;NACA;EEF1D;PALLD;AAK1;SKIV2L;MYL9;SSBP3
up EGF PTP1B KO vs wt MEF (Mouse) [18515860]	17/55	0.00155645	0.00726343	0	0	2.63263	17.0209	PDGFRB;EPHA4;SHC1;TGFB1I1;CTNND1;INPPL1;NEDD9;LPP;EGFR;CYLD;GJA1;DAB2;SH3PXD2A;CTTN;ST5;EPHB3;FGFR1
down 10min PPase inhibitors vs ctrl Hepa1-6 (Mouse) [18846507]	172/958	0.00173038	0.00765011	0	0	1.30085	8.27262	POP1;EHMT2;ZMYND8;DCAF8;ZFP608;IRS2;PHRF1;FNBP1L;SLC4A4;EEF1B2;FAM122B;HELB;HMGN5;ZFP281;PTTG1;AKT1;PSMD1;KIF21A;SYNPO;JUNB;TLE4;SMARCC2;FNBP1;LMO7;CTPS;SCAMP3;BCR;NUP93;PRKAR1A;VDAC1;KCTD12;TLN1;VCL;RAI14;MACF1;COPB2;COPA;NDRG3;MYCBP2;CTR9;TWF1;HTATSF1;RTN4;HSP90B1;FXR1;SLC9A3R1;HSPH1;RACGAP1;PCBP2;MAP2K7;FAM83D;SEC31A;BCL9L;HEXIM1;PDHA1;OSBPL3;EIF2AK3;SSH3;ZZEF1;SMARCA4;EHD1;UCK2;PPFIBP1;DAP;RP…
up 240min BMP4 vs ctrl hESC (Human) [19664995]	50/229	0.00190764	0.00801209	0	0	1.64896	10.3256	RPLP1;CTNND1;DOCK7;YBX1;WDR44;AKAP12;EEF1B2;HELB;EEF2K;SALL2;RNPEP;TNKS1BP1;TK1;TLE4;PCYT1A;FNBP1;MKL1;DYRK1B;LMO7;NAV2;ENAH;EEF1D;MYL9;VGLL4;RBMS2;MACF1;AHNAK;FLII;PALM2;MYCBP2;CTR9;ADD1;SLC9A3R1;CALD1;BAG3;LMNA;MICALL2;SPP1;EIF4B;RUNX1T1;BCL9L;SORBS1;SORBS3;PTPN14;SMTN;MARCKS;NACA;AAK1;SKIV2L;SSBP3
up PDGF PTP1B KO vs wt MEF (Mouse) [18515860]	18/63	0.00304934	0.0121974	0	0	2.35373	13.6348	PDGFRB;EPHA4;SHC1;TGFB1I1;CTNND1;DENND2A;INPPL1;NEDD9;PIK3R1;LPP;EGFR;SH3PXD2A;CTTN;ST5;RASA1;LDLR;EPHB3;FGFR1
up PTP1B KO PDGF vs basal MEF (Mouse) [18515860]	20/75	0.00444748	0.0169813	0	0	2.13998	11.5889	IFITM3;PDGFRB;EPHA4;SHC1;TGFB1I1;CTNND1;INPPL1;PIK3R3;NEDD9;PIK3R1;LPP;EGFR;GJA1;DAB2;SH3PXD2A;CTTN;ST5;RASA1;EPHB3;MAPK3
down metaphase anaphase telophase 60min noscapine release vs ctrl HeLa (Human) [19691289]	95/517	0.00912872	0.0333397	0	0	1.33075	6.24962	RPL4;TOP2B;RPL30;NUMA1;POP1;DDX47;RPL34;EHMT2;ZMYND8;DOCK7;HP1BP3;KIF14;EHMT1;PIK3C2A;MKI67;JPH1;LMNB1;GOLGA2;TUBA1C;DHX57;NUSAP1;CEP170;KIF21A;SYNPO;GTSE1;EMD;HIST1H1C;ABCC4;GAS2L3;RBM14;SMARCC2;CKAP2L;RPS5;ARHGEF17;CKAP2;LMO7;NAV1;ACTR8;SCAMP3;NUP93;ASPM;INF2;RNF169;PSRC1;CTTN;CANX;VDAC1;KIF20A;SLC25A5;ZMYND11;RPL28;PHLDB2;ITGB3BP;ANAPC2;RAI14;GTF3C1;COPA;CDCA2;AHNAK;CTR9;ITPR3;RRBP1;HTATSF1;AU…
down metaphase anaphase telophase 15min noscapine release vs ctrl HeLa (Human) [19691289]	79/429	0.0154387	0.0540353	0	0	1.33247	5.55758	RPL4;TOP2B;HSP90AB1;NUMA1;EHMT2;ZMYND8;DOCK7;HP1BP3;KIF14;EHMT1;PIK3C2A;MKI67;LMNB1;GOLGA2;DHX57;NUSAP1;CEP170;KIF21A;GTSE1;EMD;HIST1H1C;ABCC4;GAS2L3;RBM14;SMARCC2;RPS5;CKAP2;KIF23;LMO7;NAV1;SCAMP3;NUP93;ASPM;PSRC1;MYH9;VDAC1;KIF20A;SLC25A5;ZMYND11;PHLDB2;RAI14;GTF3C1;MACF1;CDCA2;AHNAK;CTR9;ITPR3;HTATSF1;AURKB;LIMA1;PTDSS1;RACGAP1;PCBP2;LMNA;RPL14;RPL13;RICTOR;RPL18;LYN;SVIL;ARFGEF2;CSNK1A1;CAV1;…
down HS+LS 3min LPS vs ctrl RAW264.7 macrophage (Mouse) [20222745]	16/65	0.0220442	0.0712199	0	0	1.91963	7.32284	RPL4;IVNS1ABP;CAMK2D;HSP90AB1;RIPK2;RPLP1;CLTC;PLA2G4A;SCAMP3;ACLY;EEF1D;RPL14;AAK1;SEC61B;ARHGEF7;MAPK3
up PTP1B KO EGF vs basal MEF (Mouse) [18515860]	16/65	0.0220442	0.0712199	0	0	1.91963	7.32284	IFITM3;PDGFRB;EPHA4;SHC1;CTNND1;INPPL1;PIK3R1;LPP;EGFR;CYLD;GJA1;DAB2;SH3PXD2A;CTTN;EPHB3;MAPK3
down PTP1B KO PDGF vs basal MEF (Mouse) [18515860]	2022-07-01	0.0318949	0.0992287	0	0	2.74044	9.44167	PDGFRB;EPHA4;CYLD;CTNND1;NEDD9;LPP;FGFR1
down PTP1B KO EGF vs basal MEF (Mouse) [18515860]	2027-08-01	0.0340203	0.102061	0	0	2.47285	8.36021	PDGFRB;ST5;TGFB1I1;PIK3R3;NEDD9;LPP;EPHB3;FGFR1
down G1-phase HeLa (Human) [18669648]	233/1439	0.0395847	0.114659	0	0	1.14436	3.69549	RPL4;POP1;RAPH1;FNBP1L;MKI67;HERC2;RPL18A;DPYSL2;DHX57;AKT1;PSMD1;KIF21A;PRKACA;SYNPO;TBC1D22A;JUNB;SMARCC2;FNBP1;ACSL4;CTPS;PHKA2;SCAMP3;PRKAR1A;SUB1;TAGLN2;VDAC1;MXRA7;TLN2;TLN1;MYL9;MACF1;CDCA3;SAR1A;FLII;MYCBP2;MTMR9;HTATSF1;HSPH1;RACGAP1;PCBP2;HIVEP1;LYN;VASP;PBX2;XRCC1;SMARCA2;SMARCA4;FOSL2;EHD1;PPFIBP1;WNK1;GOLGB1;PDE3A;PAF1;MAGED2;CALM2;CDS2;PHF3;TOP2B;SH3KBP1;RPLP1;CLTC;GDI2;SRA1;JPH1;LY…
down basal PTP1B KO vs wt MEF (Mouse) [18515860]	1938-10-01	0.0415216	0.116261	0	0	2.09785	6.67438	IFITM3;EPHA4;IFITM2;CAV1;CTNND1;INPPL1;PTK2B;EGFR;MAPK3;EPHB3
up metaphase anaphase telophase 15min noscapine release vs ctrl HeLa (Human) [19691289]	64/359	0.0483258	0.130654	0	0	1.27817	3.87259	TOP2B;RPL30;NUMA1;POP1;DDX47;RPL34;ZMYND8;EHMT2;DOCK7;HP1BP3;HSPB1;MKI67;PIK3C2A;JPH1;LMNB1;GOLGA2;TUBA1C;SNRPD2;CEP170;SYNPO;GTSE1;HIST1H1C;PBRM1;RBM14;SMARCC2;CKAP2L;ARHGEF17;LMO7;NAV1;ACTR8;ASPM;INF2;RNF169;PSRC1;CTTN;EEF1D;CANX;KIF20A;RPL28;PHLDB2;ITGB3BP;ANAPC2;COPA;CDCA2;AHNAK;RRBP1;HTATSF1;AURKB;LIMA1;LMNA;RICTOR;CLASP1;SVIL;SMARCA2;SMARCA4;TPX2;CENPE;PPFIBP1;CENPF;PRC1;PHF14;NCAPD2;PNPLA6…
up HS 30min LPS vs ctrl RAW264.7 macrophage (Mouse) [20222745]	21/100	0.0509801	0.130654	0	0	1.56269	4.65105	MAP4K1;TRAM1;RIPK2;CETN2;SSR3;PRKAG2;PHKB;PIK3C2A;ELL2;RPS6KA4;NUP93;ACLY;RASSF2;PEG12;CDK5;AAK1;PTK2B;GEMIN7;PRKACA;RAB6A;CAMK2G
up 7min cross-link ZAP-70 null vs reconstituted Jurkat (Human) [19605366]	18/83	0.0513282	0.130654	0	0	1.62759	4.83316	CYFIP1;TSG101;CD82;WDR1;ANXA2;CLTC;GDI2;ERBIN;DYRK1B;ACTA1;LDHB;LDHA;CDK5;PTPRA;ADAM9;CALM1;ACP1;MPZL1
down 50nM dasatinib vs ctrl K562 (Human) [19651622]	78/451	0.0581565	0.143681	0	0	1.23235	3.50556	TOP2B;NUMA1;POP1;DDX47;EHMT2;ZMYND8;NAB2;HSPB1;IRS2;CHD3;PHRF1;DCAF6;WDR44;LMNB1;FAM122B;PTTG1;EME1;TRPS1;TNKS1BP1;CEP170;JUNB;HIST1H1C;CAP1;ABCC4;SMARCC2;ANXA2;MKL1;ZCRB1;SCAMP3;TANC2;RUNX1;BCR;ACLY;CTTN;HECW2;CDC42EP4;SUB1;MAP1A;ADAM9;TAGLN2;PLEC;GTF3C1;PFKFB3;NDRG3;AHNAK;SHC1;PRCC;ASAP1;HTATSF1;RTN4;FAM129B;SLC9A3R1;LIMA1;TNKS2;LMNA;MICALL2;RPL13;EIF4B;QSER1;BCL9L;MAPK3;LYN;PPP1R14A;SPAG7;NDE1…
up 3min cross-link ZAP-70 null vs reconstituted Jurkat (Human) [19605366]	19/91	0.064182	0.152835	0	0	1.55088	4.25877	ITGB1;RPL4;CYFIP1;TSG101;ANXA2;CLTC;GDI2;ERBIN;DYRK1B;ELP3;EEF1A1;ACTA1;LDHB;LDHA;PTPRA;ADAM9;CALM1;ACP1;MPZL1
up HS 10min LPS vs ctrl RAW264.7 macrophage (Mouse) [20222745]	20/97	0.0655008	0.152835	0	0	1.52658	4.16099	MAP4K1;CSF1R;TRAM1;CAMK2D;RIPK2;CETN2;SSR3;PRKAG2;PHKB;PIK3C2A;ELL2;RPS6KA4;NUP93;RASSF2;RPS27;AAK1;PTK2B;PRKACA;RAB6A;CAMK2G
up 5min cross-link ZAP-70 null vs reconstituted Jurkat (Human) [19605366]	16/75	0.0719303	0.163301	0	0	1.59334	4.19375	RPL4;CYFIP1;TSG101;ANXA2;CLTC;GDI2;ERBIN;DYRK1B;ELP3;ACTA1;LDHB;LDHA;CDK5;ADAM9;CALM1;ACP1
up metaphase anaphase telophase 60min noscapine release vs ctrl HeLa (Human) [19691289]	41/229	0.0919328	0.20322	0	0	1.2827	3.06142	MACF1;TOP2B;HSP90AB1;AHNAK;NUMA1;DOCK7;HP1BP3;HSPB1;MKI67;HTATSF1;AURKB;TUBA1C;SNRPD2;RACGAP1;CEP170;SYNPO;GTSE1;SVIL;ARFGEF2;PBRM1;SMARCC2;CSNK1A1;KIF23;LMO7;NUP93;TPX2;ASPM;CENPF;KIF18A;INF2;KIF18B;PSRC1;EEF1D;PRC1;TAOK2;PHF14;MYH9;KIF20A;PNPLA6;VIM;RAI14
up HS+LS 10min LPS vs ctrl RAW264.7 macrophage (Mouse) [20222745]	18/90	0.0978908	0.205571	0	0	1.46875	3.41323	RPL4;LYN;IVNS1ABP;PRKAA1;CAMK2D;RIPK2;RPLP1;CLTC;ACLY;HSPH1;EEF1D;PRKAR1A;CANX;AAK1;SEC61B;TK1;ARHGEF7;MAPK3
up 2min cross-link ZAP-70 null vs reconstituted Jurkat (Human) [19605366]	18/90	0.0978908	0.205571	0	0	1.46875	3.41323	ITGB1;RPL4;CYFIP1;CD82;WDR1;ANXA2;CLTC;ERBIN;DYRK1B;ELP3;EEF1A1;ACTA1;LDHB;LDHA;PTPRA;ADAM9;CALM1;ACP1
down HS+LS 10min LPS vs ctrl RAW264.7 macrophage (Mouse) [20222745]	1956-12-01	0.106093	0.217362	0	0	1.60159	3.59307	CAMK2D;HSP90AB1;RIPK2;RPLP1;CLTC;CFL1;RPL14;AAK1;PLA2G4A;ARHGEF7;RPL18;SCAMP3
up HS+LS 90min LPS vs ctrl RAW264.7 macrophage (Mouse) [20222745]	18/92	0.114937	0.229874	0	0	1.42889	3.09121	LYN;IVNS1ABP;PRKAA1;CAMK2D;HSP90AB1;RIPK2;RPLP1;CLTC;SCAMP3;ACLY;HSPH1;EEF1D;PRKAR1A;CANX;AAK1;SEC61B;ARHGEF7;MAPK3
down HS+LS 30min LPS vs ctrl RAW264.7 macrophage (Mouse) [20222745]	1958-12-01	0.129544	0.253063	0	0	1.53178	3.13055	RPL4;CAMK2D;RIPK2;EEF1D;RPLP1;CFL1;RPL14;AAK1;PLA2G4A;TK1;ARHGEF7;RPL18
down HS 90min LPS vs ctrl RAW264.7 macrophage (Mouse) [20222745]	14/70	0.132667	0.253273	0	0	1.4681	2.96544	MAP4K1;CSF1R;ARFGEF2;CAMK2D;GFPT1;ELL2;CLK1;ACLY;RPS27;PEG12;CDK5;AAK1;PTK2B;GEMIN7
up HS 3min LPS vs ctrl RAW264.7 macrophage (Mouse) [20222745]	19/101	0.142895	0.266737	0	0	1.36095	2.64793	MAP4K1;CSF1R;TRAM1;RIPK2;CETN2;PRKAG2;PHKB;PIK3C2A;ELL2;RPS6KA4;NUP93;CLK1;RASSF2;RPS27;AAK1;PTK2B;PRKACA;RAB6A;CAMK2G
down 60min BMP4 vs ctrl hESC (Human) [19664995]	90/561	0.172599	0.315181	0	0	1.12424	1.97504	PHF3;TRIM71;NUMA1;POP1;DDX47;EHMT2;RPLP1;ZMYND8;CTNND1;DOCK7;HJURP;HDLBP;HSPB1;FNBP1L;PIK3C2A;MKI67;ACTB;WDR44;LMNB1;AKAP13;LASP1;SALL2;PTTG1;DPYSL2;CFL1;TNKS1BP1;TK1;SEC61B;PBRM1;RBM14;SMARCC2;LMO7;CTPS;ARFGAP1;MLF2;ACTA2;SFPQ;RNF169;CTTN;CANX;PTMA;DBN1;VCL;RBMS2;ANAPC2;RAI14;GTF3C1;KANK1;DYNC1I2;COPA;WDR26;TMF1;AHNAK;TSHZ3;PALM2;AEBP1;RTN4;ADD1;SLC9A3R1;LIMA1;PRKAR2B;CALD1;LMNA;FLNA;RPL18;CLASP…
up HS+LS 30min LPS vs ctrl RAW264.7 macrophage (Mouse) [20222745]	16/86	0.17956	0.320916	0	0	1.34209	2.30469	LYN;IVNS1ABP;PRKAA1;CAMK2D;HSP90AB1;RIPK2;CLTC;SCAMP3;ACLY;HSPH1;PRKAR1A;CANX;AAK1;SEC61B;ARHGEF7;MAPK3
up 0min cross-link ZAP-70 null vs reconstituted Jurkat (Human) [19605366]	17/93	0.189879	0.332289	0	0	1.31338	2.18201	ITGB1;CYFIP1;TSG101;ANXA2;CLTC;GDI2;ERBIN;DYRK1B;ELP3;EEF1A1;ACTA1;LDHB;LDHA;PTPRA;ADAM9;CALM1;ACP1
down HS+LS 90min LPS vs ctrl RAW264.7 macrophage (Mouse) [20222745]	1947-09-01	0.238844	0.409446	0	0	1.38991	1.99027	RPL4;CAMK2D;RIPK2;CFL1;RPL14;AAK1;PLA2G4A;TK1;RPL18
up HS+LS 3min LPS vs ctrl RAW264.7 macrophage (Mouse) [20222745]	14/81	0.287039	0.475173	0	0	1.22628	1.53057	LYN;PRKAA1;CAMK2D;RIPK2;CLTC;HSPH1;PRKAR1A;CFL1;CANX;AAK1;TK1;ARHGEF7;RPL18;MAPK3
up 50nM dasatinib vs ctrl K562 (Human) [19651622]	1937-07-01	0.288695	0.475173	0	0	1.36902	1.70085	VAMP8;SLC4A7;EEF2K;PALLD;MAP1A;CEP170;NAV1
down 10min cross-link ZAP-70 null vs reconstituted Jurkat (Human) [19605366]	1956-10-01	0.294155	0.475173	0	0	1.2756	1.56089	EEF1A1;ACLY;LDHA;WDR1;ANXA2;CDK5;PTPRA;DYRK1B;ADAM9;CALM1
down M-phase HeLa (Human) [18669648]	151/1001	0.331507	0.525408	0	0	1.04389	1.15257	IRS2;FNBP1L;MKI67;EEF1B2;RPL18A;EME1;DHX57;FTH1;AKT1;MAP3K8;KIF21A;PRKACA;MAF1;SYNPO;HMGN3;CAST;FNBP1;RPS8;TBC1D2B;LMO7;ZCRB1;CTPS;PDIA6;CDC25B;ACLY;BIN3;PRKAR1A;ERF;ANAPC4;TAGLN2;PHLDB2;KCTD15;ANAPC2;MACF1;COPB2;MYCBP2;SLC1A3;ITPR3;IQGAP1;HTATSF1;RTN4;SLC9A3R1;HIVEP1;NDUFV3;QSER1;MARK1;HEXIM1;IVNS1ABP;VASP;KLHDC4;ACBD5;CAV2;ST13;GFPT1;XRCC1;PARVA;EEF2;SMARCA2;SSH3;CLK3;SMARCA4;FOSL2;BCL9;PPFIBP1…
up HS 90min LPS vs ctrl RAW264.7 macrophage (Mouse) [20222745]	17/106	0.374191	0.57253	0	0	1.12068	1.10162	MAP4K1;TRAM1;RIPK2;CETN2;SSR3;PRKAG2;PHKB;PIK3C2A;RPS6KA4;NUP93;CLK1;RASSF2;AAK1;PTK2B;PRKACA;RAB6A;CAMK2G
up 5nM dasatinib vs ctrl K562 (Human) [19651622]	1934-06-01	0.374871	0.57253	0	0	1.25698	1.23331	SLC4A7;EEF2K;RPS15A;EHMT2;CEP170;BCL9L
up G1-phase HeLa (Human) [18669648]	230/1554	0.40601	0.592769	0	0	1.02016	0.91955	MAML2;POP1;RAPH1;CBLB;MKI67;FNBP1L;RPS6KA4;RPS14;HERC2;RPL18A;FTH1;DHX57;AKT1;PSMD1;FAM53B;KIF21A;SYNPO;GTSE1;JUNB;MEF2A;FNBP1;FNDC3A;CTPS;SCAMP3;RUNX1;NUP93;PRKAR1B;HECW2;TAGLN2;KCTD15;MACF1;CDCA3;MYCBP2;HSPA4L;IQGAP1;HTATSF1;KALRN;FXR1;RACGAP1;PCBP2;HIVEP1;SSR1;RAB11FIP2;S100A11;CDR2;HEXIM1;VASP;LYN;ST13;PBX2;XRCC1;PARVA;GNG12;SMARCA2;ELL2;SMARCA4;FOSL2;VANGL1;EHD2;TPX2;PPFIBP1;SMTN;WNK1;MAGED2…
down HS 30min LPS vs ctrl RAW264.7 macrophage (Mouse) [20222745]	1975-12-01	0.411067	0.592769	0	0	1.11732	0.993301	RPS6KA4;MAP4K1;CLK1;CSF1R;ARFGEF2;CAMK2D;RPS27;CDK5;GFPT1;AAK1;PTK2B;PRKACA
down HS 3min LPS vs ctrl RAW264.7 macrophage (Mouse) [20222745]	13/83	0.435303	0.592769	0	0	1.08932	0.906	CSF1R;ARFGEF2;CAMK2D;SSR3;GFPT1;PIK3C2A;RPS6KA4;CLK1;ACLY;PEG12;CDK5;PTK2B;GEMIN7
down starvation PTP1B KO vs wt MEF (Mouse) [18515860]	2023-04-01	0.436851	0.592769	0	0	1.23473	1.02256	EPHA4;PIK3R1;LDLR;EPHB3
down PDGF PTP1B KO vs wt MEF (Mouse) [18515860]	2023-04-01	0.436851	0.592769	0	0	1.23473	1.02256	EPHA4;CAV1;MAPK3;FGFR1
up M-phase HeLa (Human) [18669648]	331/2252	0.437701	0.592769	0	0	1.01162	0.835823	RPL4;CPNE8;CYFIP1;RNH1;RPL3;POP1;EHMT2;RAPH1;GCC2;MKI67;FNBP1L;BACH1;CDC20;RPS14;SNRPD2;DPYSL2;DHX57;CREB3L2;AKT1;PSMD1;KIF21A;SYNPO;GTSE1;JUNB;MEF2A;SMARCC2;FNBP1;ACSL4;FNDC3A;CTPS;PHKA2;SCAMP3;RUNX1;BCR;NUP93;MYL6;SUB1;TAGLN2;VDAC1;KCTD12;KIF20A;TLN1;MYL9;MACF1;CDCA2;CDCA3;SAR1A;FLII;MYCBP2;HSPA4L;MTMR9;IQGAP1;HTATSF1;KALRN;ZBTB3;MTMR6;SNX4;PTDSS1;HSPH1;RACGAP1;RAD21;PCBP2;HIVEP1;SSR1;RAB11FIP2…
up 10min cross-link ZAP-70 null vs reconstituted Jurkat (Human) [19605366]	1970-11-01	0.443634	0.592769	0	0	1.09353	0.888775	ITGB1;RPL4;CYFIP1;LDHB;LDHA;TSG101;CD82;CLTC;GDI2;ERBIN;ACP1
down LS 30min LPS vs ctrl RAW264.7 macrophage (Mouse) [20222745]	15/97	0.444577	0.592769	0	0	1.07295	0.869769	CAP1;SMARCC2;ST13;RIPK2;HP1BP3;SNAP23;AHNAK2;CHD3;HTATSF1;PDIA6;LMNB1;CANX;HIST1H1D;ARHGEF1;SEC31A
up LS 10min LPS vs ctrl RAW264.7 macrophage (Mouse) [20222745]	18/118	0.455848	0.5983	0	0	1.05576	0.829401	RPL30;ST13;RIPK2;CTR9;GPATCH2;PRKAG2;YBX1;HTATSF1;PDIA6;EEF1D;FTH1;CANX;LMNA;HIST1H1D;PDCD4;MYH9;ARHGEF1;EIF4B
up LS 3min LPS vs ctrl RAW264.7 macrophage (Mouse) [20222745]	15/99	0.477963	0.617676	0	0	1.04728	0.773126	CAP1;WDR26;ST13;RIPK2;HP1BP3;GPATCH2;HTATSF1;PDIA6;FTH1;CANX;HIST1H1D;PDCD4;MYH9;ARHGEF1;EIF4B
down 10uM erlotinib vs ctrl KG-1 (Human) [22115753]	2026-04-01	0.536977	0.664279	0	0	1.06617	0.662942	MACF1;TAGLN2;CD34;GTSE1
down 10uM gefitinib vs ctrl KG-1 (Human) [22115753]	2026-04-01	0.536977	0.664279	0	0	1.06617	0.662942	TAGLN2;VIM;COPS8;CD34
down 0min cross-link ZAP-70 null vs reconstituted Jurkat (Human) [19605366]	1947-07-01	0.537749	0.664279	0	0	1.02616	0.636592	RPL4;ACLY;WDR1;CD82;CDK5;OGN;MPZL1
down HS 10min LPS vs ctrl RAW264.7 macrophage (Mouse) [20222745]	1983-12-01	0.559141	0.680693	0	0	0.990963	0.5761	MAP4K1;CLK1;ACLY;CSF1R;ARFGEF2;PEG12;CDK5;GFPT1;PTK2B;GEMIN7;PIK3C2A;PRKACA
down 30min BMP4 vs ctrl hESC (Human) [19664995]	70/488	0.576903	0.691235	0	0	0.981467	0.539886	TRIM71;NUMA1;POP1;RPLP1;ZMYND8;CTNND1;HJURP;HDLBP;YBX1;FNBP1L;LMNB1;AKAP12;AKAP13;SALL2;DPYSL2;CFL1;TNKS1BP1;SEC61B;CGNL1;HIST1H1C;RBM14;SMARCC2;HMGCS1;FNBP1;CTPS;MLF2;ACTA2;ACLY;SFPQ;CTTN;EEF1D;PTMA;DBN1;VCL;KANK1;MACF1;DYNC1I2;COPA;WDR26;TMF1;AHNAK;FLII;PALM2;CTR9;HTATSF1;RTN4;ADD1;SLC9A3R1;LIMA1;HSPH1;CALD1;LMNA;SPP1;FLNA;EIF4B;FARP1;SVIL;NCAPH2;GFPT1;XRCC1;DSTN;TPX2;CENPF;MARCKS;CCDC8;CCNYL1;…
down 2min cross-link ZAP-70 null vs reconstituted Jurkat (Human) [19605366]	1949-07-01	0.584258	0.691235	0	0	0.977182	0.52515	EEF1A1;ACLY;TSG101;CDK5;GDI2;OGN;MPZL1
up LS 30min LPS vs ctrl RAW264.7 macrophage (Mouse) [20222745]	17/122	0.618221	0.714882	0	0	0.949018	0.456391	RPL30;WDR26;RIPK2;CTR9;GPATCH2;PRKAG2;YBX1;HTATSF1;RTN4;EEF1D;FTH1;LMNA;HIST1H1D;PDCD4;MYH9;PTMA;EIF4B
up LS 90min LPS vs ctrl RAW264.7 macrophage (Mouse) [20222745]	15/108	0.621266	0.714882	0	0	0.945432	0.450021	RPL30;WDR26;RIPK2;CTR9;GPATCH2;PRKAG2;HTATSF1;PDIA6;RTN4;FTH1;CANX;HIST1H1D;MYH9;ARHGEF1;EIF4B
down 5nM dasatinib vs ctrl K562 (Human) [19651622]	49/352	0.659192	0.748272	0	0	0.947324	0.394789	ZMYND8;NAB2;HSPB1;PHRF1;EME1;DHX57;TRPS1;HIST1H1C;ABCC4;SMARCC2;MKL1;NAV1;RUNX1;BCR;VAMP8;CTTN;MAP1A;TAGLN2;GTF3C1;NDRG3;PFKFB3;AHNAK;SHC1;ASAP1;HTATSF1;RTN4;ADD1;FAM129B;HDAC7;LIMA1;TNKS2;MICALL2;CKB;QSER1;EIF4B;BCL9L;MAPK3;LYN;PPP1R14A;TRPV2;XRCC1;SMARCA4;SLC4A7;MARCKS;ESYT2;TACC1;TCF4;VIM;RAB3GAP1
down EGF PTP1B KO vs wt MEF (Mouse) [18515860]	2023-03-01	0.671826	0.752445	0	0	0.879389	0.349782	IFITM3;PTK2B;MAPK3
down 5min cross-link ZAP-70 null vs reconstituted Jurkat (Human) [19605366]	1961-08-01	0.681135	0.752834	0	0	0.884728	0.33973	ITGB1;EEF1A1;ACLY;CD82;WDR1;PTPRA;OGN;MPZL1
down LS 90min LPS vs ctrl RAW264.7 macrophage (Mouse) [20222745]	15/113	0.692102	0.75502	0	0	0.896931	0.33009	CAP1;SMARCC2;ST13;HP1BP3;SNAP23;AHNAK2;CHD3;YBX1;LMNB1;EEF1D;LMNA;HIST1H1D;PDCD4;PTMA;SEC31A
down LS 3min LPS vs ctrl RAW264.7 macrophage (Mouse) [20222745]	16/122	0.714078	0.769007	0	0	0.88441	0.297836	RPL30;SMARCC2;RIPK2;CTR9;SNAP23;AHNAK2;PRKAG2;CHD3;YBX1;HTATSF1;RTN4;LMNB1;EEF1D;LMNA;PTMA;SEC31A
down LS 10min LPS vs ctrl RAW264.7 macrophage (Mouse) [20222745]	12/101	0.817059	0.860996	0	0	0.789707	0.159556	CAP1;SMARCC2;WDR26;HP1BP3;SNAP23;AHNAK2;CHD3;HTATSF1;PTMA;RTN4;SEC31A;LMNB1
down 3min cross-link ZAP-70 null vs reconstituted Jurkat (Human) [19605366]	1946-05-01	0.819996	0.860996	0	0	0.714561	0.141809	EEF1A1;ACLY;CD82;CDK5;OGN
down 7min cross-link ZAP-70 null vs reconstituted Jurkat (Human) [19605366]	1950-05-01	0.871944	0.904239	0	0	0.650892	0.0891914	ITGB1;EEF1A1;ACLY;LDHA;ERBIN
down 240min BMP4 vs ctrl hESC (Human) [19664995]	79/610	0.888022	0.909681	0	0	0.868778	0.103175	PHF3;TRIM71;NUMA1;POP1;DDX47;RPLP1;ZMYND8;CTNND1;DOCK7;HJURP;HDLBP;HSPB1;YBX1;FNBP1L;PIK3C2A;MKI67;LMNB1;AKAP12;AKAP13;LASP1;SALL2;DPYSL2;CFL1;PSMD1;TNKS1BP1;SEC61B;JARID2;PBRM1;RBM14;SMARCC2;LMO7;ARFGAP1;MLF2;SFPQ;RNF169;CTTN;EEF1D;PTMA;DBN1;VCL;KANK1;DYNC1I2;COPB2;RTN3;WDR26;TMF1;AHNAK;TSHZ3;PALM2;HTATSF1;RTN4;ADD1;FXR1;SLC9A3R1;LIMA1;PRKAR2B;CALD1;FLNA;RPL18;CLASP1;SVIL;NCAPH2;GFPT1;XRCC1;DSTN…
up 4h cisplatin vs ctrl mESC (Mouse) [22006019]	52/455	0.979279	0.991077	0	0	0.752147	0.015749	CYFIP1;TOP2B;JRK;NUMA1;POP1;POP4;GDI2;HP1BP3;RAPH1;CHD6;IRS2;LSP1;1110038F14RIK;TUBA1B;EME1;TRIM2;HADH;RBM14;AKR1A1;TET1;NAV2;RBX1;ENAH;SFPQ;PSMA1;EEF1D;MAP1A;ARHGEF1;UTRN;ARHGEF7;RIN2;DOCK1;COPB2;VCP;PFKFB3;MYCBP2;CTR9;FGD1;OSGEP;BC005624;CALD1;NRIP1;FLNA;EIF4B;CAML;CEP350;BNIP3;PTPN14;ARHGAP31;PHF14;TACC2;VIM
down 4h cisplatin vs ctrl mESC (Mouse) [22006019]	53/535	0.999527	0.999527	0	0	0.638151	0.000301809	RPL4;NUMA1;CHD3;CCND3;TUBB5;RPL18A;CSPP1;DACT3;POLK;CGNL1;PDK1;RIPK3;DAPK1;RIPK2;ATRX;COBL;KIF23;ACTN4;CTPS;PDIA6;ETV4;TUBB2B;PSMA4;KIF16B;MAP1A;ERF;BLVRB;TLN2;ARHGEF7;GTF3C1;MACF1;FAM129A;PRICKLE2;ADCY3;MFF;INPP5A;ATP5E;EPS8L2;CKB;BUB3;JAM2;IVNS1ABP;ATF7IP;FDPS;NDE1;AHNAK2;USF2;CENPF;SEC23IP;KIF18B;PHF14;AGGF1;SEC24D

## Sheet: Kinase_Perturbations_from_GEO
Term	Overlap	P-value	Adjusted P-value	Old P-value	Old Adjusted P-value	Odds Ratio	Combined Score	Genes
ROCK1 knockdown 156 GSE34769	31/300	1.12144e-10	3.18488e-08	0	0	4.43438	101.597	HSPB6;FHL1;SMC6;ADH7;CSAD;LRRC32;FSTL1;PAPSS2;PTGS1;ALDH2;TIMP2;TMEM209;PRKCI;UTP6;PTGIS;MCAM;FN1;TAP2;OSMR;DHRS4;TAPBP;SNX18;DAP;RCN1;CXCL12;PALLD;PKP2;LCN2;ECHDC2;IL6ST;CRLF1
BRD4 knockdown 223 GSE50865	29/300	2.14362e-09	3.04394e-07	0	0	4.10081	81.8553	GLTP;OAT;MAOA;PRIM1;PPAN;GLRX;THY1;ADH7;THBS1;GLG1;ERMP1;ORC2;SERPINH1;FAM3C;CBR3;PDGFRA;UTP6;NOP14;TEX30;IDH1;MMP2;ECH1;PLAUR;PLA2G4A;DUSP9;COL3A1;NAF1;PFN2;PPIC
EGFR drugactivation 19 GDS2146	27/300	3.50898e-08	3.32184e-06	0	0	3.77456	64.7917	PRPS2;NRP1;LXN;GEMIN2;NOL3;LDHB;ALCAM;PDLIM2;ARHGDIB;ESD;AGA;XDH;SH3D19;VCAM1;LMO4;RFC2;NONO;ECH1;EPHX1;PAWR;PARP9;RCN3;CXCL12;MXRA8;NCAPD3;PLCB1;IRF9
IRAK4 knockout 41 GSE12124	26/300	1.33589e-07	9.48479e-06	0	0	3.61412	57.2062	TAGLN;FOXC1;HSPB6;CD81;MVP;HSPB1;THY1;NOL3;FSTL1;PAPSS2;CNN1;ALCAM;RRAS;AGA;SIL1;TGM2;RBPMS;TPM2;REXO2;PDIA6;MSH3;ECHDC2;PLCB1;MYL9;CRYAB;ITM2B
IRAK4 defectivemutant 200 GSE6789	25/300	4.87585e-07	2.3079e-05	0	0	3.45545	50.2208	SCARB1;OAT;SERPINE2;HSPB6;HSPB8;CRABP1;NOC4L;THBS1;LGALS3;GPC1;ARHGDIB;SERPINH1;EMB;FARP2;NQO1;PDGFRA;DIMT1;PLA2G4A;GNG12;ACADSB;DCLK1;BICC1;ENAH;COL3A1;COL5A1
BRD4 druginhibition 224 GSE50865	25/300	4.87585e-07	2.3079e-05	0	0	3.45545	50.2208	RPS19BP1;MAOA;CRABP1;THY1;PDS5B;ADH7;IFIT2;PTGS1;ARHGDIB;SERPINH1;UTP20;VASP;CERS5;MLKL;GPX8;REXO2;PBX1;TTC39B;DAP;RBP1;MGP;SBDS;NAF1;DCTPP1;PFN2
MET knockout 249 GDS3148	21/300	5.52481e-05	0.00142641	0	0	2.83789	27.8217	TOR3A;PRKCI;KLHDC4;NOP14;ELOF1;TEX30;RPS19BP1;PUS1;IFRD1;PRUNE2;DDX56;PDIA6;RASSF1;ADI1;TUBB3;PPIF;NF1;NMT2;GAS1;SRFBP1;TMEM209
ERBB3 knockout 239 GSE32129	21/300	5.52481e-05	0.00142641	0	0	2.83789	27.8217	PRIM2;GBP7;RRM2;CDKN2A;GPX8;MICAL2;ISG15;TTK;PTGR1;ATP1B1;PSMB8;KIF15;HEBP1;PDLIM1;LDHB;ANXA6;TIMELESS;GAS1;MAGED2;PLEKHO2;ABCG2
FGFR1 drugactivation 149 GSE32316	21/300	5.52481e-05	0.00142641	0	0	2.83789	27.8217	NOP14;GSTM1;SERPINE2;SSNA1;APLP2;CLTB;HSPB1;PTPRK;AMPD3;CSRP2;CDH2;FTH1;MAPKAPK2;MED31;SBDS;TXNL4A;MNAT1;EIF2B1;DCTPP1;PHLDA3;ABCG2
ROCK2 knockdown 157 GSE34769	21/300	5.52481e-05	0.00142641	0	0	2.83789	27.8217	PRKCI;UTP6;HSPB6;MCAM;FHL1;FN1;ABAT;ADH7;CSAD;LRRC32;DHRS4;IRGQ;RASSF1;SNX18;RCN1;GPRC5A;CXCL12;NPEPL1;TIMP2;ECHDC2;PCBD2
MAP2K4 knockdown 62 GSE19091	21/300	5.52481e-05	0.00142641	0	0	2.83789	27.8217	ABCC4;GSTM1;CD81;MCAM;APLP2;DCXR;PRRX2;DSTN;HSPB1;CRIP1;PDIA6;IGF1R;MMP14;PDLIM2;GM2A;COTL1;EZR;SPTAN1;CRLF1;PFN2;EZH2
ALK druginhibition 187 GSE50803	20/300	0.000159902	0.00283827	0	0	2.68768	23.4928	NOP14;MLKL;DTX3L;DDX24;PUS1;PLAUR;PLA2G4A;HAUS6;BCS1L;AATF;PUS7;NDRG1;IWS1;FAM107B;IRF2BPL;ATG101;NAMPT;PPIF;CEBPZ;FBN1
SYK druginhibition 286 GSE43510	20/300	0.000159902	0.00283827	0	0	2.68768	23.4928	GLTP;NQO1;RRM2;TFRC;ATL3;DDX24;DIMT1;RFC2;GEMIN2;NCAPG2;SERPINB9;PDIA6;PDLIM1;LDHB;TUBB2A;BAG2;GM2A;COTL1;PPIF;S100A10
MET knockout 257 GSE25583	20/300	0.000159902	0.00283827	0	0	2.68768	23.4928	TMEM55A;PRPS2;ELOF1;TFRC;KDM1A;H2AFY;CD81;TMEM176B;FHL1;GOLIM4;TBC1D2B;GLG1;PSMB8;C3;RCN3;PDLIM1;PRRC1;NPEPL1;GM2A;ANXA6
SRC overexpression 277 GSE15161	20/300	0.000159902	0.00283827	0	0	2.68768	23.4928	PDGFRB;CERS5;ATL3;NONO;VPS4A;ADH7;REXO2;ANTXR1;SLC7A1;COL1A2;NPEPL1;LOX;P4HA3;GMPPA;SERPINH1;FAT1;CYP1B1;EIF2B1;CMTR1;PPIC
STK11 knockout 278 GSE34866	20/300	0.000159902	0.00283827	0	0	2.68768	23.4928	CPNE8;TOR3A;ABCC4;GSTM1;RAB4B;MME;MAOA;APLP2;ATP6AP2;EPDR1;ADH7;RENBP;GPHN;IFIT2;HEBP1;IMPACT;SGCD;CAT;SBDS;AGA
SYK druginhibition 287 GSE43510	19/300	0.000439632	0.0059455	0	0	2.53909	19.6261	ABCC4;URI1;JUN;ACSL1;STAT1;EIF2AK2;ISG15;FNDC3A;BAZ1A;PUS7;PDIA6;FOXP1;ENAH;ALCAM;NAMPT;MAPKAPK2;NF1;UTP20;PDLIM5
ULK1 knockout 197 GSE60778	19/300	0.000439632	0.0059455	0	0	2.53909	19.6261	GLTP;FKBP11;KLHDC4;PTGIS;NSUN5;SLC11A2;CRABP1;FAM129A;PDS5B;WDR46;APBB1IP;CSRP2;CXCL12;CWF19L1;SBDS;EMB;EIF2B1;KCTD15;CBR3
MET knockout 262 GSE8747	19/300	0.000439632	0.0059455	0	0	2.53909	19.6261	GLTP;TOR3A;RIPK2;EPHX1;FHL1;DDX56;CSAD;LPP;REXO4;KIF15;LDHB;CHAF1A;GLOD4;CWF19L1;GMPPA;TMED3;MACROD1;TXNL4A;NUDT14
MET knockout 253 GSE30651	19/300	0.000439632	0.0059455	0	0	2.53909	19.6261	TMEM55A;LMO4;GOLIM4;TBC1D2B;PDS5B;OSMR;NID1;COL1A1;ALCAM;ORC6;P2RX4;RRAS;APPBP2;FTH1;ACP6;TIMP2;PKP2;MYADM;ACADM
AKT1 knockdown 43 GSE12291	19/300	0.000439632	0.0059455	0	0	2.53909	19.6261	NRP1;ABCC4;FAM129A;THY1;AATF;PTGR1;DCLK1;MPP7;REXO4;IFIH1;VCAN;CMSS1;SGCD;CDH2;CALD1;CDH11;ACADM;NCAPD3;SH3D19
BRAF druginhibition 175 GSE42872	18/300	0.00114599	0.0108488	0	0	2.39212	16.1982	H2AFY;DDX24;GLO1;TPM1;PLAUR;EPDR1;GNG12;EGFR;ADAT2;CHSY1;ARHGDIB;COTL1;TMEM209;POLR3H;RRP12;DTL;EZH2;TGM2
BRAF druginhibition 38 GDS5085	18/300	0.00114599	0.0108488	0	0	2.39212	16.1982	H2AFY;DDX24;GLO1;TPM1;PLAUR;EPDR1;GNG12;EGFR;ADAT2;CHSY1;ARHGDIB;COTL1;TMEM209;POLR3H;RRP12;DTL;EZH2;TGM2
GSK3A knockdown 201 GDS4305	18/300	0.00114599	0.0108488	0	0	2.39212	16.1982	SCARB1;UTP6;ECHS1;DDX27;DDX24;CDKN2A;DIMT1;EYA4;PPAN;DDX31;PWP2;AATF;EGFR;LDHB;LYRM4;MAPKAPK2;RRP12;ITM2C
SYK druginhibition 154 GSE34176	18/300	0.00114599	0.0108488	0	0	2.39212	16.1982	SUZ12;RRM2;TFRC;RBPMS;CMC2;BUD31;NCAPG2;PLA2G4A;ACSL4;BAZ1A;ARID1A;ANTXR1;GM2A;GPC1;RRP12;EIF2B1;TRMT61A;EZH2
JAK1 druginhibition 165 GSE38335	18/300	0.00114599	0.0108488	0	0	2.39212	16.1982	CEBPB;DIMT1;MCAM;DDX51;GLRX;BAZ1A;PUS7;SLC7A1;IRF2BPL;RCN1;ST5;GPC1;ESF1;PGAM5;TMEM209;FAM3C;JAK2;RSL24D1
JAK2 druginhibition 167 GSE38335	18/300	0.00114599	0.0108488	0	0	2.39212	16.1982	CEBPB;DIMT1;MCAM;DDX51;GLRX;BAZ1A;PUS7;SLC7A1;IRF2BPL;RCN1;ST5;GPC1;ESF1;PGAM5;TMEM209;FAM3C;JAK2;RSL24D1
KSR1 knockout 126 GSE28228	18/300	0.00114599	0.0108488	0	0	2.39212	16.1982	LPGAT1;PTGIS;DDX24;DDX56;PLAUR;GLRX;PTGS1;ALAD;PDLIM1;LGALS3;SLC9A3R1;UCHL1;DNPEP;GPC1;NMT2;EZR;DCTPP1;PFN2
ERBB3 drugactivation 31 GDS4361	18/300	0.00114599	0.0108488	0	0	2.39212	16.1982	CDA;H2AFY;MCAM;MICAL2;AK3;PBX1;PTGS1;FAM107B;TMEM59;ANPEP;CASP3;MAPKAPK2;MGP;CYP1B1;SYNPO;ACPP;SPTAN1;EPHB3
SRC overexpression 276 GSE37428	18/300	0.00114599	0.0108488	0	0	2.39212	16.1982	CHID1;FKBP11;CERS5;GLO1;CLTB;FNDC3A;PSMB8;IFIT2;FAM107B;HELZ2;IFIH1;ESD;CDH11;MXRA8;PKP2;XAF1;MYL9;PPIC
AURKA druginhibition 196 GSE57810	17/300	0.00282646	0.021124	0	0	2.24674	13.1855	HELLS;UTP6;TEX30;RFC2;PRIM1;MEPCE;CDCA8;ARID1A;WDR46;DCK;SBNO1;ADI1;TIMELESS;PPIF;NAF1;DCTPP1;EZH2
JAK1 druginhibition 166 GSE38335	17/300	0.00282646	0.021124	0	0	2.24674	13.1855	PRPF38B;UTP6;MCAM;VPS4A;DDX31;ABAT;SMC6;F11R;SDAD1;APPBP2;CHSY1;CYP1B1;SRFBP1;RRP12;MDN1;LGMN;FBN1
JAK2 druginhibition 168 GSE38335	17/300	0.00282646	0.021124	0	0	2.24674	13.1855	PRPF38B;UTP6;MCAM;VPS4A;DDX31;ABAT;SMC6;F11R;SDAD1;APPBP2;CHSY1;CYP1B1;SRFBP1;RRP12;MDN1;LGMN;FBN1
MET knockout 259 GSE25583	17/300	0.00282646	0.021124	0	0	2.24674	13.1855	FKBP11;SUZ12;TMEM55A;PRIM2;MORC3;EIF2AK2;PDS5B;SDAD1;TPST2;RAB32;APPBP2;GUK1;MAGED2;NCAPD3;CMTR1;DCTPP1;S100A10
MET knockout 258 GSE25583	17/300	0.00282646	0.021124	0	0	2.24674	13.1855	IKBIP;MORC3;DDX24;LMO4;MCAM;MICAL2;NOC4L;HAUS6;PDS5B;RAB32;MMP14;ORC6;PALLD;FTH1;SERPINH1;PPIF;TRMT61A
IRAK2 knockout 76 GSE24264	17/300	0.00282646	0.021124	0	0	2.24674	13.1855	PON3;LXN;KDM1A;ATP6AP2;VPS4A;MGST1;REXO2;ADAT2;UCHL1;DPP7;APPBP2;PPIF;MAGED2;TXNL4A;PGPEP1;B2M;XDH
EGFR drugactivation 30 GDS4361	17/300	0.00282646	0.021124	0	0	2.24674	13.1855	JUN;LXN;COL12A1;AKAP8L;CRIP2;SOD2;PBX1;ARHGAP35;BICC1;IGF1R;C3;LGALS3;SCRN1;GM2A;MAPKAPK2;GBP2;SPTAN1
ATM knockout 16 GDS1544	17/300	0.00282646	0.021124	0	0	2.24674	13.1855	PRPF38B;JUN;GLO1;ECH1;DDX54;NOC4L;LPP;DDA1;GNAO1;CEBPZ;ACADM;PGLS;EZR;TXNL4A;RSL24D1;ITM2B;IRF9
ERBB3 knockdown 65 GSE19921	16/300	0.00658142	0.0346134	0	0	2.10292	10.564	TEX30;ATL3;RFC2;PRIM1;GLO1;CPSF2;CDCA8;SLC7A1;GPHN;LDHB;DSN1;MGP;ACOT1;MPHOSPH10;IL6ST;DTL
GSK3A knockdown 207 GDS4305	16/300	0.00658142	0.0346134	0	0	2.10292	10.564	KANK1;DDX27;TRRAP;NSUN5;PUS1;TAP2;DDX31;DDX10;AATF;PUS7;PBX1;LDHB;PDCD11;POLR1B;MED31;KCTD15
SYK druginhibition 285 GSE43510	16/300	0.00658142	0.0346134	0	0	2.10292	10.564	NQO1;TOR3A;H2AFY;DIMT1;GEMIN2;DNTTIP2;AATF;PDIA6;FAM107B;LDHB;TUBB2A;RRAS;GM2A;ESD;DHX37;MPHOSPH10
SYK druginhibition 288 GSE43510	16/300	0.00658142	0.0346134	0	0	2.10292	10.564	ABCC4;TEX30;RFC2;FAM129A;DDX10;GPX7;BCS1L;PUS7;PDIA6;NT5C;CMSS1;BAG2;POLR1B;DCTPP1;DTL;MDN1
MET knockout 248 GDS3148	16/300	0.00658142	0.0346134	0	0	2.10292	10.564	VCAM1;TRRAP;LY75;HAUS6;GLRX;CHD3;OSMR;SDAD1;NID1;MEA1;CP;PDIA6;RASSF1;PRRC1;NF1;UTP20
MET knockout 250 GDS3148	16/300	0.00658142	0.0346134	0	0	2.10292	10.564	CHID1;NRP2;ISYNA1;RAB4B;TEX30;ITGA3;PTPRK;AEBP1;ATP1B1;PDIA6;IWS1;VCAN;TUBB3;ESF1;JAK2;ACPP
BRAF overexpression 180 GSE46801	16/300	0.00658142	0.0346134	0	0	2.10292	10.564	HELLS;PRIM2;NQO1;URI1;RRM2;RBPMS;RFC2;SMC6;THY1;ANTXR1;FSTL1;RAB32;LDHB;ADI1;FTH1;CEBPZ
ULK1 knockout 198 GSE60778	16/300	0.00658142	0.0346134	0	0	2.10292	10.564	FARP2;PTGIS;ATAD5;DDX58;CRABP1;NCAPG2;SMC6;MEIS2;DHRS4;CXCL12;ESD;ECHDC2;ATM;EMB;CKB;NCAPD3
CDK8 knockdown 129 GSE30816	16/300	0.00658142	0.0346134	0	0	2.10292	10.564	IKBIP;TAGLN;ELOF1;KDM1A;RFC2;LMOD1;DDX51;GNG12;SDAD1;PTGS1;IRGQ;RNPEP;PKP2;ECHDC2;PLCD1;S100A10
KDR knockdown 119 GSE27869	16/300	0.00658142	0.0346134	0	0	2.10292	10.564	HELLS;UTP6;DDX27;GEMIN2;GPX7;PDS5B;FOXP1;TMEM59;OXCT1;ARHGDIB;ESD;SERPINH1;FKBP7;MAGED2;RRP12;AGA
CDK8 knockdown 63 GSE19199	16/300	0.00658142	0.0346134	0	0	2.10292	10.564	PRPS2;NQO1;TES;OAT;TFRC;CD81;TAP2;DDX54;PWP2;AATF;GLG1;ALCAM;PALLD;ORC2;ACADM;B2M
CDK8 knockdown 163 GSE38061	16/300	0.00658142	0.0346134	0	0	2.10292	10.564	ZCCHC8;TMEM55A;CDA;NRP1;NQO1;CYB5A;TFRC;RFC2;ANK3;ANTXR1;PBX1;CSRP1;FTH1;BSG;TIMP2;TGM2
PIK3CA knockdown 182 GSE46869	16/300	0.00658142	0.0346134	0	0	2.10292	10.564	SCARB1;FOXC1;CD81;ATP6AP2;VPS4A;GPX8;ATP1B1;THBS1;GPHN;DDA1;LGALS3;PDCD11;NMT2;PGAM5;KCTD15;PFN2
MAP4K5 knockdown 199 GSE61497	16/300	0.00658142	0.0346134	0	0	2.10292	10.564	COL14A1;PRIM1;MMP2;SMC6;ANK3;PTPRK;CHD3;OSMR;ANTXR1;PDLIM2;TMSB4X;P4HA3;POLR1B;MGP;ANXA7;ITM2C
MET knockdown 254 GSE38343	16/300	0.00658142	0.0346134	0	0	2.10292	10.564	GAMT;FKBP11;SLC12A2;TFRC;TRRAP;CD81;APLP2;NDRG1;RCN1;ORC6;CDH2;BSG;MED31;TMED3;H1FX;ITM2C
ATM knockdown 113 GSE27869	16/300	0.00658142	0.0346134	0	0	2.10292	10.564	PRPF38B;LMO4;DDX55;MGST1;ECE1;BCS1L;GNG12;ENAH;LGALS3;LDHB;FTH1;GLOD4;MACROD1;EP400;ADAM9;MAGED2
SYK druginhibition 152 GSE34176	15/300	0.0144348	0.0630692	0	0	1.96065	8.30947	NQO1;TOR3A;TFRC;SLC11A2;LMOD1;DNTTIP2;PLA2G4A;ACSL4;BAZ1A;ADH7;ARID1A;PDIA6;GM2A;CSPG4;RRP12
SYK druginhibition 290 GSE43510	15/300	0.0144348	0.0630692	0	0	1.96065	8.30947	TOR3A;GPX7;THY1;BCS1L;PUS7;PDIA6;FAM107B;APBB1IP;PRRC1;TUBB2A;NAMPT;PPIF;DCTPP1;DTL;TRMT61A
CHEK2 knockdown 84 GSE27869	15/300	0.0144348	0.0630692	0	0	1.96065	8.30947	FARP2;DIMT1;PRUNE2;VPS37C;DDX31;APBB1IP;HEBP1;PDLIM1;SNX18;ERMP1;CSRP1;CTSL;MSH3;FTH1;FKBP7
IGF1R knockdown 52 GSE16684	15/300	0.0144348	0.0630692	0	0	1.96065	8.30947	GLTP;RRM2;TRRAP;LMO4;CMC2;NCAPG2;CDCA8;ALAD;TGFBR3;DAP;ORC6;GM2A;TIMELESS;BLVRB;DCTPP1
CDK19 knockdown 162 GSE38061	15/300	0.0144348	0.0630692	0	0	1.96065	8.30947	NRP1;CPT1A;TFRC;MAOA;PUS1;COL12A1;FN1;SLC7A1;PBX1;FAM107B;VCAN;PALLD;ACADM;ARPIN;LGMN
FGFR1 activemutant 58 GSE17916	15/300	0.0144348	0.0630692	0	0	1.96065	8.30947	PDGFRA;ACY3;TAGLN;OAT;H6PD;NDUFB2;THY1;PUS7;NID1;AGPAT1;RCN3;BAG3;ST5;KCTD12;ITM2B
ABL1 mutant 179 GSE45452	15/300	0.0144348	0.0630692	0	0	1.96065	8.30947	GAMT;RAB4B;H2AFY;LMO4;TPM2;DHRS4;ALCAM;MYADM;EP400;POLR3H;CD14;PLEKHO2;NUDT14;CAMK2G;CBR3
ERBB2 overexpression 230 GSE14990	15/300	0.0144348	0.0630692	0	0	1.96065	8.30947	ACSL1;MAOA;TPM2;ECH1;EPHX1;AHNAK2;HSPB1;F11R;MEIS2;C3;TGFBR3;EHD2;FTH1;TIMP2;BLVRB
TRIM33 knockdown 304 GSE32903	15/300	0.0144348	0.0630692	0	0	1.96065	8.30947	PRPS2;CDA;URI1;TES;RAB4B;RBPMS;NEXN;ARID1A;MED12;RCN3;CNN1;RRAS;RBP1;PLCD1;EZH2
ATM knockout 74 GSE23116	15/300	0.0144348	0.0630692	0	0	1.96065	8.30947	NRP1;PDGFRA;URI1;PRRX1;MAOA;LMO4;PAWR;PTPRK;GNG12;NID1;EGFR;SBDS;NAF1;CD14;ACADM
GSK3B knockdown 206 GDS4305	15/300	0.0144348	0.0630692	0	0	1.96065	8.30947	MORC3;LMO4;MCAM;APLP2;MEPCE;AKAP8L;AHNAK2;SMC6;BAZ1A;ALAD;CALD1;CAT;KCTD12;PGLS;ARHGEF40
FGFR3 druginhibition 36 GDS5023	14/300	0.0297492	0.10561	0	0	1.81992	6.39692	NRP2;LRP1;DDX24;RFC2;DDX56;CLTB;SLC7A1;EGFR;DSN1;COTL1;PPIF;PKP2;RRP12;DCTPP1
RAF1 activemutant 219 GSE42964	14/300	0.0297492	0.10561	0	0	1.81992	6.39692	GAMT;ZCCHC8;GSTM2;TES;GSTM1;NCAPG2;TPM1;EYA4;ATP1B1;PTGS1;TTC39B;ALCAM;CSRP2;TMSB4X
SYK druginhibition 289 GSE43510	14/300	0.0297492	0.10561	0	0	1.81992	6.39692	FOXC1;EIF2AK2;PAWR;SERPINB9;CHD3;AGPAT1;PDIA6;FOXP1;CDH2;ALDH2;NAMPT;DPH6;UTP20;ACADM
CDK8 knockdown 128 GSE30815	14/300	0.0297492	0.10561	0	0	1.81992	6.39692	PRPF38B;CMC2;PUS1;BUD31;DDX54;GLRX;PDS5B;AATF;REXO2;KIF15;DHRS4;HAUS1;CHAF1A;EZR
CDK9 druginhibition 183 GSE48258	14/300	0.0297492	0.10561	0	0	1.81992	6.39692	NRP2;H6PD;ACSL1;NONO;DCXR;ATP6AP2;PPAN;TAP2;NDUFB2;ISG15;CNN1;FTH1;ACPP;CBR3
BTK mutant 1 GDS1346	14/300	0.0297492	0.10561	0	0	1.81992	6.39692	HELLS;GTF2A1;DNTTIP2;CDCA8;LMO7;REXO2;RENBP;PDIA6;TAPBP;MMP14;ALDH2;CASP3;FKBP7;SLU7
MET knockout 256 GSE25583	14/300	0.0297492	0.10561	0	0	1.81992	6.39692	SUZ12;JUN;ELOF1;ECHS1;GOLIM4;DDX54;GLG1;IRGQ;PRRC1;GM2A;GUK1;PPIF;PGLS;SIL1
TGFBR2 knockout 294 GSE36778	14/300	0.0297492	0.10561	0	0	1.81992	6.39692	IKBIP;KANK1;PRKCI;FOXC1;ACSL1;ATP2B4;GNAO1;PDLIM1;OXCT1;ACP6;MAP1A;CAT;SYNPO;PLCB1
IGF1R druginhibition 47 GSE14024	14/300	0.0297492	0.10561	0	0	1.81992	6.39692	CPNE8;TOR3A;TAGLN;GSTM1;VCAM1;ACSL1;AATF;PTGR1;DHRS4;COL3A1;VCAN;FTH1;GLOD4;MGP
EGFR drugactivation 20 GDS2146	14/300	0.0297492	0.10561	0	0	1.81992	6.39692	PDGFRA;DDX58;CLTB;CHD3;CP;MED12;PDLIM2;OXCT1;ST5;GPC1;MXRA8;AGA;ITM2B;IRF9
PIK3CG knockdown 96 GSE27869	14/300	0.0297492	0.10561	0	0	1.81992	6.39692	TMEM176B;DDX56;DSTN;FNDC3A;DCLK1;ACTG2;FOXP1;HEBP1;CHSY1;MED31;AOX1;CD248;KCTD15;PPIC
FGFR1 mutant 25 GDS4046	14/300	0.0297492	0.10561	0	0	1.81992	6.39692	H6PD;RIPK3;H2AFY;ATP2B4;NEXN;ABAT;HAUS1;COL5A1;ADI1;MAGED2;H1FX;ACPP;SPTAN1;SLU7
FGFR1 mutant 26 GDS4046	14/300	0.0297492	0.10561	0	0	1.81992	6.39692	RBPMS;H2AFY;NONO;ATP2B4;DCK;KIF15;FAM107B;ALAD;IMPACT;ABHD17B;ANPEP;PGLS;SPTAN1;CMTR1
PLK1 knockdown 98 GSE27869	14/300	0.0297492	0.10561	0	0	1.81992	6.39692	SLC12A2;H2AFY;MCAM;BUD31;ECE1;REXO2;DHRS4;PDLIM1;LDHB;ZC2HC1A;MED31;ACADM;PGPEP1;WASF2
ATM knockdown 18 GDS1852	14/300	0.0297492	0.10561	0	0	1.81992	6.39692	PRPS2;H2AFY;NDUFB2;DDX10;PBXIP1;AGPAT1;DNPH1;UCHL1;ALCAM;CSRP2;CASP3;COTL1;MAGED2;TXNL4A
HUNK knockout 240 GSE14226	13/300	0.0574692	0.164861	0	0	1.68069	4.8009	PRPS2;NONO;DNTTIP2;ADAR;TTK;DUSP9;TGFBR3;DSN1;ORC6;ESF1;CSPG4;EZR;DTL
RET knockout 270 GSE32093	13/300	0.0574692	0.164861	0	0	1.68069	4.8009	TMEM55A;UTP6;KLHDC4;LPGAT1;SLC11A2;NCAPG2;DDX51;ADH7;SDAD1;REXO2;IFIT2;CASP3;PPIL4
GSK3B knockdown 208 GDS4305	13/300	0.0574692	0.164861	0	0	1.68069	4.8009	CDA;TRRAP;MAOA;PUS1;MEPCE;TAP2;ACSL4;ARHGAP35;IGF1R;CHSY1;ADI1;POLR1B;TMED3
TYK2 knockdown 176 GSE44652	13/300	0.0574692	0.164861	0	0	1.68069	4.8009	PRPS2;TFRC;PUS1;DDX55;CPSF2;PPAN;ISG15;HAUS6;GLRX;REXO4;PDLIM1;XAF1;WASF2
TYK2 knockdown 35 GDS4754	13/300	0.0574692	0.164861	0	0	1.68069	4.8009	PRPS2;TFRC;PUS1;DDX55;CPSF2;PPAN;ISG15;HAUS6;GLRX;REXO4;PDLIM1;XAF1;WASF2
PIK3CA druginhibition 57 GSE17785	13/300	0.0574692	0.164861	0	0	1.68069	4.8009	TOR3A;DDX27;GPX8;DNTTIP2;PUS7;ARFGAP3;IRF2BPL;ENAH;CSRP1;BAG2;BAG3;POLR1B;SRFBP1
SYK druginhibition 283 GSE43510	13/300	0.0574692	0.164861	0	0	1.68069	4.8009	DDX27;DIMT1;PUS1;BCS1L;PARP9;SLC7A1;FAM107B;SBNO1;PDCD11;ATG101;PPIF;MPHOSPH10;UTP20
MAP2K1 druginhibition 172 GSE39984	13/300	0.0574692	0.164861	0	0	1.68069	4.8009	DDX27;PPAN;DDX54;BAZ1A;PUS7;SLC7A1;TPST2;BAG3;ESD;ANXA7;SRFBP1;EMB;PGLS
HIPK2 knockout 171 GSE39253	13/300	0.0574692	0.164861	0	0	1.68069	4.8009	VASP;COL18A1;DDX27;LMO4;DDX56;MED19;ECE1;RCN1;AUH;APPBP2;BAG3;EMB;IL6ST
TBK1 knockdown 53 GSE17643	13/300	0.0574692	0.164861	0	0	1.68069	4.8009	GAMT;SCARB1;H6PD;SERPINE2;GLO1;ATP6AP2;FN1;CLTB;DDX51;SMC6;COL1A1;IRGQ;TRMT61A
SYK knockdown 279 GDS3609	13/300	0.0574692	0.164861	0	0	1.68069	4.8009	NRP2;IDH1;AKAP8L;EIF2AK2;SLC7A1;MEIS2;PBX1;CXCL5;LGALS3;GPRC5A;APPBP2;TIMP2;GBP2
IRAK1 knockdown 115 GSE27869	13/300	0.0574692	0.164861	0	0	1.68069	4.8009	GTF2A1;H2AFY;NCAPG2;RBM19;HSD17B11;KIF15;IGF1R;CTSL;MSH3;GLOD4;MED31;CD248;PLEKHO2
EPHA4 knockout 226 GSE34430	13/300	0.0574692	0.164861	0	0	1.68069	4.8009	HELLS;MLKL;SLC11A2;VPS4A;AGPAT1;ANTXR1;ENAH;RAB32;NPEPL1;MAPKAPK2;ADAM9;H1FX;CBR3
CDK8 knockdown 161 GSE38061	13/300	0.0574692	0.164861	0	0	1.68069	4.8009	CDA;KLHDC4;TES;TFRC;DCXR;AMPD3;CHD3;SLC7A1;PBX1;FAM107B;CHAF1A;PALLD;WASF2
IGF1R knockout 151 GSE32936	13/300	0.0574692	0.164861	0	0	1.68069	4.8009	GLTP;PON3;PRKCI;CPT1A;SERPINE2;FHL1;NDUFB2;DSTN;SORBS1;REXO4;TMEM59;CPE;PCBD2
SCYL1 knockdown 194 GSE57646	13/300	0.0574692	0.164861	0	0	1.68069	4.8009	SUZ12;RBM25;ANXA1;MGST1;VPS13A;AK3;ARHGAP35;TTC39B;SNX18;ERMP1;COTL1;AGA;EPHB3
MELK knockdown 150 GSE32873	13/300	0.0574692	0.164861	0	0	1.68069	4.8009	FARP1;GSTM1;TGFB1I1;MVP;AHNAK2;ADAR;AATF;MEIS2;EGFR;RASSF1;ORC6;TIMP2;S100A10
TNIK knockdown 297 GSE17623	13/300	0.0574692	0.164861	0	0	1.68069	4.8009	COL18A1;GSTM2;AHNAK2;PPAN;HSPB1;ACSL4;DDA1;NPEPL1;ATG101;ESD;ORC2;PPIF;PLCD1
ERBB3 drugactivation 70 GSE21463	13/300	0.0574692	0.164861	0	0	1.68069	4.8009	NRP2;MME;APLP2;AHNAK2;VPS37C;RENBP;NDRG1;RAB32;TGFBR3;ALCAM;EOGT;MYADM;PDLIM5
PDK1 knockout 265 GSE42187	12/300	0.103807	0.237751	0	0	1.54295	3.49514	ALAD;KDM1A;RFC2;FTH1;GLO1;DDX56;MAGED2;TBC1D2B;H1FX;TLN2;PUS7;DCK
GSK3B knockdown 202 GDS4305	12/300	0.103807	0.237751	0	0	1.54295	3.49514	NRP2;PRRX1;MAOA;ADI1;OXCT1;MCAM;GPC1;MEPCE;FHL1;EGFR;PFN2;ITM2C
GSK3A knockdown 203 GDS4305	12/300	0.103807	0.237751	0	0	1.54295	3.49514	LDHB;UTP6;NOP14;NSMCE4A;TUBB3;CALD1;CWF19L1;MAPKAPK2;TBC1D2B;PUS7;LGMN;DHRS4
SYK knockdown 190 GSE54065	12/300	0.103807	0.237751	0	0	1.54295	3.49514	CHAF1A;ORC6;TEX30;ALDH2;TUBB3;MCAM;PRIM1;SORBS1;EZR;DCTPP1;DTL;MEIS2
ILK activemutant 78 GSE25729	12/300	0.103807	0.237751	0	0	1.54295	3.49514	NQO2;CMSS1;NPEPL1;SSNA1;SLC11A2;VPS4A;MED19;PGAM5;SORBS1;PCBD2;SPTAN1;GPHN
SYK druginhibition 153 GSE34176	12/300	0.103807	0.237751	0	0	1.54295	3.49514	COL1A1;EHD2;PON3;TFRC;GM2A;NMT2;ACSL4;BAZ1A;ADH7;ARID1A;PDLIM5;PDIA6
SYK druginhibition 281 GSE43510	12/300	0.103807	0.237751	0	0	1.54295	3.49514	PDLIM1;SBNO1;BAG2;DDX24;STAT1;POLR1B;DDX10;MPHOSPH10;SRFBP1;UTP20;PDIA6;FAM107B
SYK druginhibition 282 GSE43510	12/300	0.103807	0.237751	0	0	1.54295	3.49514	SUZ12;ACY3;BAG2;RFC2;CMC2;GLO1;NAMPT;UTP20;LRRC32;PUS7;PDIA6;HAUS1
SYK druginhibition 284 GSE43510	12/300	0.103807	0.237751	0	0	1.54295	3.49514	SCARB1;CMSS1;DDX24;CHSY1;POLR1B;ANXA7;PAWR;PUS7;SNX8;PDIA6;DCTPP1;ADAT2
AKT1 druginhibition 81 GSE26290	12/300	0.103807	0.237751	0	0	1.54295	3.49514	RAB32;TES;PDLIM2;MLKL;CHSY1;CMC2;APLP2;SERPINB9;TBC1D2B;NID1;MPP7;DDA1
MET knockout 251 GDS3148	12/300	0.103807	0.237751	0	0	1.54295	3.49514	SLC12A2;NRP2;CERS5;TEX30;AUH;TUBB3;MSH3;ITGA3;PPIF;GLRX;SDAD1;NDRG1
RET druginhibition 184 GSE49414	12/300	0.103807	0.237751	0	0	1.54295	3.49514	NRP1;PRPF38B;ECHS1;VCAM1;AUH;SCRN1;SLC11A2;ARHGDIB;CYP1B1;COL8A1;RRP12;TGM2
TRIM24 knockout 300 GSE19675	12/300	0.103807	0.237751	0	0	1.54295	3.49514	GNAO1;PON3;PRKCI;CERS5;OAT;TEX30;GLO1;IDH1;MGP;MACROD1;VPS37C;TAPBP
CSF1R druginhibition 195 GSE57686	12/300	0.103807	0.237751	0	0	1.54295	3.49514	FKBP11;HEBP1;TAGLN;CERS5;NPEPL1;VPS4A;TMED3;COTL1;BLVRB;PCBD2;DCTPP1;LGMN
CDC7 knockdown 109 GSE27869	12/300	0.103807	0.237751	0	0	1.54295	3.49514	HEBP1;TOR3A;PRPF38B;CHSY1;RIPK2;BAG3;GEMIN2;GLO1;PRUNE2;EP400;NDUFB2;FAM3C
PLK2 knockdown 87 GSE27869	12/300	0.103807	0.237751	0	0	1.54295	3.49514	TMEM55A;CHSY1;CTSL;GEMIN2;GLOD4;MEPCE;DDX31;UTP20;JAK2;PTGR1;IGF1R;IRF2BPL
PDGFRA knockdown 117 GSE27869	12/300	0.103807	0.237751	0	0	1.54295	3.49514	LGALS3;SBNO1;URI1;BAG2;ADI1;DDX31;ATP2B4;ACSL4;SMC6;PDS5B;ACADSB;RSL24D1
MAPK1 knockdown 45 GSE12291	12/300	0.103807	0.237751	0	0	1.54295	3.49514	NRP1;CCNH;COL14A1;ANXA6;TMED3;TAP1;OSMR;ARID1A;LPP;PBX1;NFATC4;TTC39B
FLT4 knockdown 103 GSE27869	12/300	0.103807	0.237751	0	0	1.54295	3.49514	CHID1;MED12;HEBP1;HELLS;TMEM59;GPX8;FAS;AGA;PDIA6;KCTD15;KIF15;PPIC
MAPK14 knockdown 101 GSE27869	12/300	0.103807	0.237751	0	0	1.54295	3.49514	HELLS;LYRM4;CCNT1;IFRD1;DHX37;MAGED2;FAM3C;EZR;EIF2B1;ANTXR1;DNPH1;ARPIN
ERBB2 druginhibition 7 GDS2139	12/300	0.103807	0.237751	0	0	1.54295	3.49514	TOR3A;ACY3;COL3A1;TES;FTH1;DHX58;LY75;PARP9;ARHGEF40;MEIS2;PBX1;IRF9
KIT activemutant 55 GSE17743	12/300	0.103807	0.237751	0	0	1.54295	3.49514	LDHB;TMEM59;JUN;DNPEP;APPBP2;CASP3;ORC2;MGP;TMEM209;FAM3C;TRMT61A;ITM2B
TRPM7 defectivemutant 306 GSE23102	12/300	0.103807	0.237751	0	0	1.54295	3.49514	NT5C;PDLIM1;TOR3A;UCHL1;CTSL;MAPKAPK2;TIMP2;AGA;PTGR1;PGD;S100A10;FBN1
ATM knockout 75 GSE23116	12/300	0.103807	0.237751	0	0	1.54295	3.49514	NRP1;TMEM59;SLC9A3R1;CYB5A;COL1A2;NSMCE4A;LMO4;CAT;FMO1;ANTXR1;SPTAN1;EGFR
ERBB2 knockdown 232 GSE8373	12/300	0.103807	0.237751	0	0	1.54295	3.49514	FABP4;STAT1;TUBB3;MAPKAPK2;LCN2;VPS13A;FAS;KIF21A;ECE1;SORBS3;NDRG1;PPIL4
TGFBR2 knockout 293 GSE46211	11/300	0.174919	0.347391	0	0	1.40669	2.45247	CDA;DDX27;STAT1;RFC2;PPIF;DDX31;PGAM5;WDR46;RSL24D1;REXO4;EZH2
TGFBR2 knockout 296 GSE22989	11/300	0.174919	0.347391	0	0	1.40669	2.45247	DSN1;RRM2;RIPK3;BAG2;CWF19L1;CDCA8;HAUS6;TTK;NCAPD3;DHRS4;ABCG2
IGF1R druginhibition 46 GSE14024	11/300	0.174919	0.347391	0	0	1.40669	2.45247	HELLS;NQO1;SCARB1;ABCC4;TEX30;NMT2;KIF21A;BAZ1A;DTL;IWS1;EZH2
SYK knockdown 191 GSE54065	11/300	0.174919	0.347391	0	0	1.40669	2.45247	ECHS1;OAT;TUBB3;DCXR;BSG;MPHOSPH10;ESF1;CEBPZ;BCS1L;MDN1;IGF1R
AKT2 knockout 221 GSE19079	11/300	0.174919	0.347391	0	0	1.40669	2.45247	SLC12A2;RASSF1;SNX18;ELOF1;NNMT;MAOA;RIPK2;GLOD4;ATP1B1;IL6ST;CRIP1
PLK1 druginhibition 181 GSE46856	11/300	0.174919	0.347391	0	0	1.40669	2.45247	NT5C;ZCCHC8;UCHL1;CEBPB;MCAM;SLC11A2;ARHGDIB;GPX8;ACOT1;FAS;EMB
AKT1 knockout 214 GSE39699	11/300	0.174919	0.347391	0	0	1.40669	2.45247	MED12;COL18A1;COL1A2;BSG;FHL1;NDUFB2;DDX54;PGLS;CRYAB;ITM2C;HAUS1
RPS6KA3 knockout 73 GSE22137	11/300	0.174919	0.347391	0	0	1.40669	2.45247	CERS5;DNPEP;SSNA1;APLP2;RBP1;CLTB;FKBP7;DDX54;MEA1;CMTR1;CBR3
AKT1 knockdown 123 GSE27869	11/300	0.174919	0.347391	0	0	1.40669	2.45247	HELLS;TOR3A;URI1;GLO1;TPM1;DHX37;KIF14;NDUFB2;EPDR1;PDIA6;GLG1
TEK knockdown 122 GSE27869	11/300	0.174919	0.347391	0	0	1.40669	2.45247	FKBP11;FARP1;URI1;RBM25;ORC6;AUH;CHSY1;SSNA1;NDUFB2;ACPP;HAUS1
AURKB knockdown 92 GSE27869	11/300	0.174919	0.347391	0	0	1.40669	2.45247	HEBP1;TOR3A;GM2A;ABHD17B;CRABP1;NDUFB2;HSPB1;SOD2;XDH;LPP;PFN2
ATR knockdown 120 GSE27869	11/300	0.174919	0.347391	0	0	1.40669	2.45247	EHD2;HELLS;NQO1;CERS5;MED31;HSD17B11;PDLIM5;CMTR1;CAMK2G;ARPIN;HAUS1
CDK3 knockdown 110 GSE27869	11/300	0.174919	0.347391	0	0	1.40669	2.45247	LDHB;ALCAM;ZC2HC1A;CPSF2;DDX54;MNAT1;NDRG1;RSL24D1;PBX1;IWS1;FOXP1
MET knockout 252 GSE30651	11/300	0.174919	0.347391	0	0	1.40669	2.45247	GM2A;HSPB8;ANXA6;TMED3;ECHDC2;AK3;ATP1B1;B2M;SIL1;PDIA6;RRP9
PRKACA knockout 266 GSE20984	11/300	0.174919	0.347391	0	0	1.40669	2.45247	HELZ2;PRPF38B;COL14A1;NCAPG2;CDH11;TIMELESS;ABAT;CSPG4;F11R;DCLK1;IRF9
BMPR1A knockout 222 GSE48092	11/300	0.174919	0.347391	0	0	1.40669	2.45247	ERMP1;HSPB6;AKAP8L;MXRA8;TAP2;CDCA8;CHD3;GNG12;PDIA6;PAPSS2;PPIC
TRPM7 overexpression 305 GSE23102	11/300	0.174919	0.347391	0	0	1.40669	2.45247	RRM2;PALLD;PLAUR;ISG15;PARP14;GNG12;SIL1;GLG1;ITM2C;PPIC;TAPBP
JAK2 knockdown 192 GSE54645	11/300	0.174919	0.347391	0	0	1.40669	2.45247	ZCCHC8;PRIM2;DSN1;MORC3;ORC6;ESD;NMT2;PDS5B;CHD3;B2M;EZH2
PRKCA knockdown 118 GSE27869	11/300	0.174919	0.347391	0	0	1.40669	2.45247	PRIM2;SBNO1;MME;SCRN1;CWF19L1;TIMP2;ATP2B4;MAGED2;TXNL4A;RSL24D1;ARHGAP35
TRIM28 knockout 303 GSE32224	10/300	0.274414	0.466669	0	0	1.27188	1.64469	PDGFRA;DIMT1;RFC2;PRIM1;PUS1;GOLIM4;HAUS6;DCTPP1;DTL;HAUS1
SYK druginhibition 155 GSE34176	10/300	0.274414	0.466669	0	0	1.27188	1.64469	SUZ12;PUS1;BUD31;TIMELESS;ACSL4;ARID1A;SLC7A1;PDIA6;TRMT61A;CRLF1
STK33 knockdown 50 GSE15151	10/300	0.274414	0.466669	0	0	1.27188	1.64469	TMEM55A;SCARB1;IMPACT;NSMCE4A;DHX37;CEBPZ;PCBD2;SYNPO;PGD;REXO4
LRRK2 mutant 32 GDS4400	10/300	0.274414	0.466669	0	0	1.27188	1.64469	SBNO1;NRP2;ECHS1;DDX58;CPE;ABAT;DDX51;MNAT1;EIF2B1;PDIA6
IKBKB knockdown 86 GSE27869	10/300	0.274414	0.466669	0	0	1.27188	1.64469	DDX27;CTSL;MSH3;OXCT1;CMC2;HSPB8;ESD;DHX37;DDX31;REXO2
CDK8 knockdown 130 GSE30816	10/300	0.274414	0.466669	0	0	1.27188	1.64469	LDHB;KLHDC4;NOP14;CSRP2;KDM1A;ECHDC2;CSAD;APBA3;PGPEP1;PLCD1
MAP3K7 knockdown 37 GDS5023	10/300	0.274414	0.466669	0	0	1.27188	1.64469	RNF213;PDCD11;MAOA;DCXR;MVP;ECH1;COTL1;PGD;CAMK2G;LGMN
EPHA4 knockout 227 GSE34430	10/300	0.274414	0.466669	0	0	1.27188	1.64469	NT5C;SCARB1;PON3;DHX37;GOLIM4;NCAPD3;ACPP;DTL;PSMB8;IWS1
CDK9 knockdown 104 GSE27869	10/300	0.274414	0.466669	0	0	1.27188	1.64469	HEBP1;PDLIM1;NNMT;NSMCE4A;DDX55;IFRD1;KIF14;CDCA8;GNG12;ARPIN
PRKACB knockdown 91 GSE27869	10/300	0.274414	0.466669	0	0	1.27188	1.64469	SCRN1;CTSL;ACP6;NDUFB2;PLEKHO2;OSMR;ACADSB;CAMK2G;MDN1;PFN2
AKT1 activemutant 10 GDS2304	10/300	0.274414	0.466669	0	0	1.27188	1.64469	SLC9A3R1;PRKCI;KLHDC4;PRRX1;BSG;NDUFB2;ATM;ECE1;SMC6;ADAT2
AKT1 knockout 212 GSE39699	10/300	0.274414	0.466669	0	0	1.27188	1.64469	IFIH1;SBNO1;ABCC4;NSUN5;RFC2;MACROD1;DDX31;ACSL4;EIF2B1;ITM2B
HIPK2 knockdown 106 GSE27869	10/300	0.274414	0.466669	0	0	1.27188	1.64469	ERMP1;HSPB8;TPM1;SERPINH1;FN1;TMED3;VPS37C;NMT2;FSTL1;DCK
JAK1 activemutant 61 GSE18239	10/300	0.274414	0.466669	0	0	1.27188	1.64469	GLTP;NQO1;RPS19BP1;ABHD17B;CCNH;MSH3;BUD31;AKAP8L;ATP6AP2;PDS5B
IKBKE knockdown 97 GSE27869	10/300	0.274414	0.466669	0	0	1.27188	1.64469	CPNE8;UCHL1;HSPB8;NDUFB2;NMT2;PDS5B;EZR;APBA3;ARFGAP3;GPHN
AKT1 knockout 210 GSE39699	10/300	0.274414	0.466669	0	0	1.27188	1.64469	PON3;ORC6;AUH;ALDH2;ADI1;SSNA1;IDH1;MED31;SBDS;DHRS4
CDK4 knockdown 85 GSE27869	10/300	0.274414	0.466669	0	0	1.27188	1.64469	BAG2;TRRAP;MCAM;BSG;CDCA8;GPX7;PWP2;ACADSB;KCTD15;IGF1R
ABL1 mutant 24 GDS4046	10/300	0.274414	0.466669	0	0	1.27188	1.64469	SNX18;H6PD;ATP2B4;GLRX;PLCB1;ACPP;RENBP;SLU7;GLG1;HAUS1
JAK2 activemutant 72 GSE21842	10/300	0.274414	0.466669	0	0	1.27188	1.64469	GLTP;MORC3;ABHD17B;DDX55;PKP2;GPX7;SNX8;ITM2B;MPP7;DDA1
RAGE knockout 268 GDS3755	10/300	0.274414	0.466669	0	0	1.27188	1.64469	GLTP;LRP1;ANPEP;CASP3;COTL1;PLAUR;TAP1;FKBP7;ECE1;PARP9
JAK2 mutant 40 GSE11003	10/300	0.274414	0.466669	0	0	1.27188	1.64469	HELLS;CPT1A;TES;ALCAM;GPRC5A;H6PD;CCNT1;SIL1;GFRA2;SH3D19
ERBB2 knockdown 234 GSE8373	10/300	0.274414	0.466669	0	0	1.27188	1.64469	GNAO1;DNPEP;MVP;MAPKAPK2;LCN2;VPS13A;KIF21A;TLN2;NDRG1;TGM2
ERBB2 knockdown 235 GSE8373	10/300	0.274414	0.466669	0	0	1.27188	1.64469	FKBP11;LMO4;MVP;ECH1;MAPKAPK2;VPS13A;ACOT1;KIF21A;NDRG1;TGM2
TIE1 knockdown 107 GSE27869	10/300	0.274414	0.466669	0	0	1.27188	1.64469	HEBP1;DDX27;EOGT;DDX31;EPDR1;PUS7;RSL24D1;WASF2;PBX1;ACTG2
CDK4 knockdown 225 GSE8866	9/300	0.400285	0.571261	0	0	1.13851	1.0424	NQO1;GSTM1;ORC6;TEX30;SCRN1;ACSL1;RFC2;TGFB1I1;RNPEP
SYK knockdown 189 GSE54065	9/300	0.400285	0.571261	0	0	1.13851	1.0424	DNPEP;MME;KDM1A;H2AFY;ANXA7;CSPG4;PUS7;REXO2;PDIA6
WEE1 druginhibition 307 GSE38972	9/300	0.400285	0.571261	0	0	1.13851	1.0424	LXN;CCNH;ADI1;GLO1;PPAN;BAZ1A;MEA1;EIF2B1;REXO4
ITK knockout 241 GSE12465	9/300	0.400285	0.571261	0	0	1.13851	1.0424	DDX27;DDX58;OXCT1;NONO;CAT;IL6ST;SIL1;SPTAN1;ARHGAP35
MYLK knockdown 49 GSE14525	9/300	0.400285	0.571261	0	0	1.13851	1.0424	CDA;GNA14;ATP6AP2;MXRA8;PPIL4;DDA1;TGM2;PPIC;FBN1
MET knockout 247 GDS3148	9/300	0.400285	0.571261	0	0	1.13851	1.0424	GLTP;HEBP1;AUH;AKAP8L;ATP6AP2;UTP20;AATF;MNAT1;AGPAT1
AKT1 knockout 215 GSE39699	9/300	0.400285	0.571261	0	0	1.13851	1.0424	UTP6;RFC2;GEMIN2;ORC2;EP400;ESF1;PGAM5;HAUS6;RRP9
SRC activemutant 51 GSE15815	9/300	0.400285	0.571261	0	0	1.13851	1.0424	RBPMS;ATG101;CDH11;COL8A1;NEXN;CSPG4;AATF;EZH2;TGM2
EPHA4 drugactivation 229 GSE26523	9/300	0.400285	0.571261	0	0	1.13851	1.0424	PDGFRA;COL14A1;NONO;MVP;RBM19;EYA4;NDUFB2;ECE1;CAMK2G
MAP2K1 knockdown 105 GSE27869	9/300	0.400285	0.571261	0	0	1.13851	1.0424	APBB1IP;NSMCE4A;DDX27;CTSL;BUD31;KIF14;GLRX;KCTD15;HAUS1
MET knockout 260 GSE25583	9/300	0.400285	0.571261	0	0	1.13851	1.0424	RAB32;ISYNA1;GPRC5A;ERMP1;NPEPL1;GUK1;TAP1;BCS1L;TRMT61A
CDK10 knockdown 116 GSE27869	9/300	0.400285	0.571261	0	0	1.13851	1.0424	MED12;TPST2;GUK1;OXCT1;ARHGDIB;TIMP2;EP400;EZR;ARFGAP3
AKT1 activemutant 9 GDS2304	9/300	0.400285	0.571261	0	0	1.13851	1.0424	CEBPB;GBP7;FTH1;BSG;KIF21A;SORBS1;ACADSB;CP;ABCG2
AKT1 knockout 213 GSE39699	9/300	0.400285	0.571261	0	0	1.13851	1.0424	PARP10;MORC3;COL2A1;CPSF2;VPS4A;ESF1;PDS5B;ACADSB;ARHGAP35
CDK19 knockdown 164 GSE38061	9/300	0.400285	0.571261	0	0	1.13851	1.0424	VCAN;TFRC;TRRAP;MAPKAPK2;FN1;LMO7;AGA;GLG1;S100A10
MAPK1 knockdown 112 GSE27869	9/300	0.400285	0.571261	0	0	1.13851	1.0424	LDHB;HELLS;NONO;CRABP1;HSPB1;MNAT1;PPP1R12B;RSL24D1;DCLK1
MAP3K1 knockout 245 GSE39240	9/300	0.400285	0.571261	0	0	1.13851	1.0424	CSRP1;DIMT1;CWF19L1;NOC4L;DDX51;TLN2;F11R;NID1;EPHB3
PLK3 knockdown 121 GSE27869	9/300	0.400285	0.571261	0	0	1.13851	1.0424	VASP;NSMCE4A;HSPB8;FAM129A;ACSL4;CD248;MEA1;SNX8;CMTR1
GSK3B knockdown 158 GSE35351	9/300	0.400285	0.571261	0	0	1.13851	1.0424	CPNE8;PRRC1;CD81;NDUFB2;DDX31;AK3;GNG12;ANTXR1;CRIP1
GSK3B knockdown 209 GSE35351	9/300	0.400285	0.571261	0	0	1.13851	1.0424	CPNE8;PRRC1;CD81;NDUFB2;DDX31;AK3;GNG12;ANTXR1;CRIP1
CDK8 knockdown 88 GSE27869	9/300	0.400285	0.571261	0	0	1.13851	1.0424	BAG3;OXCT1;HSPB8;DDX56;RBM19;DDX31;PTGR1;PUS7;SH3D19
PIK3CA activemutant 56 GSE17785	9/300	0.400285	0.571261	0	0	1.13851	1.0424	HEBP1;LDHB;IFRD1;TIMP2;CYP1B1;BLVRB;F11R;AATF;ITM2B
CDK9 knockdown 71 GSE21751	9/300	0.400285	0.571261	0	0	1.13851	1.0424	UCHL1;RPS19BP1;FTH1;FN1;PKP2;LMO7;THBS1;WASF2;TGM2
GSK3A knockdown 205 GDS4305	9/300	0.400285	0.571261	0	0	1.13851	1.0424	TMEM59;ISYNA1;TES;GPRC5A;ECHS1;GLO1;MEPCE;RNPEP;CAT
MYLK knockdown 48 GSE14525	9/300	0.400285	0.571261	0	0	1.13851	1.0424	KANK1;P2RX4;ATL3;MMP2;BSG;EOGT;HSD17B11;RENBP;RRP9
BTK knockout 2 GDS1346	9/300	0.400285	0.571261	0	0	1.13851	1.0424	PRRC1;PRIM1;ACP6;DNTTIP2;DDX54;DDX51;FAM3C;EIF2B1;FAM107B
AURKA knockdown 89 GSE27869	9/300	0.400285	0.571261	0	0	1.13851	1.0424	TMEM59;SBNO1;CHAF1A;TRRAP;CTSL;BAG3;BUD31;RSL24D1;ITM2B
CHEK1 knockdown 95 GSE27869	9/300	0.400285	0.571261	0	0	1.13851	1.0424	RCN1;CHSY1;GUK1;BUD31;SMC6;APBA3;EIF2B1;ARFGAP3;FOXP1
CHUK knockdown 108 GSE27869	9/300	0.400285	0.571261	0	0	1.13851	1.0424	TPST2;CHSY1;APLP2;FAS;BCS1L;GNG12;EIF2B1;PDLIM5;ITM2B
CDK7 knockdown 124 GSE27869	9/300	0.400285	0.571261	0	0	1.13851	1.0424	VASP;RBM25;RIPK2;BAG3;GPC1;FAS;EPDR1;FAM3C;PLCB1
ERBB2 knockdown 237 GSE8373	9/300	0.400285	0.571261	0	0	1.13851	1.0424	GSTM1;FABP4;TUBB3;MVP;SLC11A2;MAPKAPK2;ACPP;AGPAT1;LPP
ERBB2 knockdown 238 GSE8373	9/300	0.400285	0.571261	0	0	1.13851	1.0424	GAMT;GSTM1;PDLIM2;STAT1;MAPKAPK2;LCN2;VPS13A;ECE1;WASF2
NTRK2 drugactivation 66 GSE20358	8/300	0.542825	0.723767	0	0	1.00656	0.614976	TPST2;CNN1;ECH1;NF1;DDX51;PTGR1;SDAD1;GLG1
NTRK3 drugactivation 67 GSE20358	8/300	0.542825	0.723767	0	0	1.00656	0.614976	TPST2;CNN1;ECH1;NF1;DDX51;PTGR1;SDAD1;GLG1
ITK defectivemutant 125 GSE28200	8/300	0.542825	0.723767	0	0	1.00656	0.614976	P4HA3;PRUNE2;MAPKAPK2;TIMP2;PLAUR;DSTN;DDX51;CD14
MAPK14 knockout 14 GDS2693	8/300	0.542825	0.723767	0	0	1.00656	0.614976	CERS5;RRM2;ANXA7;PBXIP1;AEBP1;SDAD1;LGMN;ITM2C
TBK1 druginhibition 188 GSE53658	8/300	0.542825	0.723767	0	0	1.00656	0.614976	BST2;LXN;FTH1;SLC11A2;GOLIM4;ANXA7;SMC6;PFN2
TRIM28 knockout 301 GSE32224	8/300	0.542825	0.723767	0	0	1.00656	0.614976	RRAS;PPAN;ACSL4;DDX51;TTK;TMEM209;DUSP9;PPIC
FLT1 knockdown 111 GSE27869	8/300	0.542825	0.723767	0	0	1.00656	0.614976	FYCO1;CSRP2;H2AFY;MCAM;ACP6;ADAM9;PFN2;DHRS4
CDK6 knockdown 93 GSE27869	8/300	0.542825	0.723767	0	0	1.00656	0.614976	NNMT;ARHGDIB;DDX31;TMEM209;PLEKHO2;REXO2;AGPAT1;CAMK2G
TRIM24 knockout 299 GSE19675	8/300	0.542825	0.723767	0	0	1.00656	0.614976	CYB5A;DNPEP;CCNT1;ABHD17B;MACROD1;ACADM;EIF2B1;DHRS4
CDK2 knockdown 90 GSE27869	8/300	0.542825	0.723767	0	0	1.00656	0.614976	LDHB;CCNT1;GUK1;CMC2;DCXR;ARFGAP3;SIL1;WASF2
MET knockout 263 GSE8747	8/300	0.542825	0.723767	0	0	1.00656	0.614976	PON3;VCAM1;CCNH;IDH1;GOLIM4;SBDS;GNG12;ITM2B
PDGFRA activemutant 54 GSE17743	8/300	0.542825	0.723767	0	0	1.00656	0.614976	IKBIP;RAB32;UTP6;RCN1;OAT;DPP7;NMT2;HAUS6
HIPK2 overexpression 28 GDS4233	8/300	0.542825	0.723767	0	0	1.00656	0.614976	IFIH1;LDHB;APPBP2;CCNH;NSUN5;DNTTIP2;SMC6;PPIL4
ERBB2 knockdown 231 GSE8373	8/300	0.542825	0.723767	0	0	1.00656	0.614976	DNPEP;P2RX4;MAPKAPK2;LCN2;FAS;KIF21A;SORBS3;TGM2
BRAF knockdown 193 GSE5481	7/300	0.685538	0.850187	0	0	0.876011	0.330739	VASP;MED12;APBB1IP;FYCO1;GSTM2;MMP14;TIMELESS
TRIM28 knockout 302 GSE32224	7/300	0.685538	0.850187	0	0	0.876011	0.330739	PID1;DPP7;NSUN5;MGP;DDX54;NOC4L;PPIC
GSK3B knockdown 204 GDS4305	7/300	0.685538	0.850187	0	0	0.876011	0.330739	NSMCE4A;TRRAP;CCNH;CALD1;ATM;TBC1D2B;HAUS6
ABL1 druginhibition 77 GSE24493	7/300	0.685538	0.850187	0	0	0.876011	0.330739	IKBIP;COL1A2;SGCD;HSPB6;DDX24;BAZ1A;PWP2
MAP3K7 knockout 246 GSE34417	7/300	0.685538	0.850187	0	0	0.876011	0.330739	EHD2;JUN;PRRC1;CDKN2A;LY75;CD248;AGPAT1
EGFR druginhibition 83 GSE27640	7/300	0.685538	0.850187	0	0	0.876011	0.330739	ALCAM;ANXA1;ITGA3;PALLD;PUS7;S100A10;PTGS1
SNRK overexpression 127 GSE30185	7/300	0.685538	0.850187	0	0	0.876011	0.330739	PARP10;RTP4;NPEPL1;PRRX1;PRRX2;MGST1;IRF9
AKT2 knockdown 44 GSE12291	7/300	0.685538	0.850187	0	0	0.876011	0.330739	ZCCHC8;RBPMS;PRRX1;TRRAP;PTPRK;PLCB1;IWS1
AKT1 activemutant 216 GSE9484	7/300	0.685538	0.850187	0	0	0.876011	0.330739	SBNO1;ECHS1;ACP6;CPSF2;ACADSB;DCTPP1;GPHN
RAGE knockout 269 GSE22873	7/300	0.685538	0.850187	0	0	0.876011	0.330739	IKBIP;ENAH;CYB5A;AUH;APPBP2;IDH1;COL8A1
JAK2 activemutant 178 GSE44961	7/300	0.685538	0.850187	0	0	0.876011	0.330739	PDLIM2;SCRN1;DIMT1;MAPKAPK2;EIF2AK2;AMPD3;SLU7
FGFR1 knockdown 94 GSE27869	7/300	0.685538	0.850187	0	0	0.876011	0.330739	URI1;DDX27;MSH3;ARHGDIB;DDX56;REXO2;MDN1
LRRK2 activemutant 159 GSE36321	7/300	0.685538	0.850187	0	0	0.876011	0.330739	COL1A2;CDKN2A;GAS1;ABAT;TLN2;CSAD;PBX1
LRRK2 mutant 33 GDS4401	7/300	0.685538	0.850187	0	0	0.876011	0.330739	COL1A2;CDKN2A;GAS1;ABAT;TLN2;CSAD;PBX1
IRAK2 knockout 39 GSE10765	7/300	0.685538	0.850187	0	0	0.876011	0.330739	PON3;SCRN1;ACP6;EP400;VPS13A;ARHGEF40;NFATC4
CDK5 knockdown 99 GSE27869	7/300	0.685538	0.850187	0	0	0.876011	0.330739	CSRP1;CPSF2;DHX37;PLAUR;NDUFB2;MNAT1;RSL24D1
TGFBR2 knockout 292 GSE46150	6/300	0.809893	0.938815	0	0	0.746845	0.157475	RPS19BP1;GUK1;CMC2;NMT2;REXO4;HAUS1
TGFBR2 knockout 295 GSE45968	6/300	0.809893	0.938815	0	0	0.746845	0.157475	GTF2A1;PID1;ACSL1;NCAPG2;CYP1B1;NMT2
MELK druginhibition 186 GSE50227	6/300	0.809893	0.938815	0	0	0.746845	0.157475	ENAH;NSMCE4A;RIPK3;TUBB3;DCTPP1;ARHGAP35
PDGFRB knockdown 114 GSE27869	6/300	0.809893	0.938815	0	0	0.746845	0.157475	CPNE8;SBNO1;GTF2A1;GLO1;ADAR;EZR
AKT1 knockout 211 GSE39699	6/300	0.809893	0.938815	0	0	0.746845	0.157475	SNX18;ACP6;MXRA8;AEBP1;SIL1;HAUS1
HIPK2 defectivemutant 17 GDS1793	6/300	0.809893	0.938815	0	0	0.746845	0.157475	CYB5A;DAP;RFC2;NMT2;HAUS6;GPHN
EPHB2 drugactivation 228 GSE26523	6/300	0.809893	0.938815	0	0	0.746845	0.157475	LOX;NF1;PAWR;PTPN21;PDLIM5;DDA1
SYK knockdown 280 GDS3609	6/300	0.809893	0.938815	0	0	0.746845	0.157475	COL18A1;VCAM1;PTGIS;CRABP1;PRRX2;PTPN21
CDK4 knockdown 133 GSE31534	6/300	0.809893	0.938815	0	0	0.746845	0.157475	FARP2;CNN1;IL1RN;COL1A2;SGCD;COL14A1
CDK2 knockdown 132 GSE31534	6/300	0.809893	0.938815	0	0	0.746845	0.157475	COL1A2;SGCD;CMC2;KIF14;DCK;HAUS1
MAP2K1 knockdown 134 GSE31534	6/300	0.809893	0.938815	0	0	0.746845	0.157475	SGCD;COL14A1;DCK;USP18;IWS1;HAUS1
MET knockout 264 GSE8747	6/300	0.809893	0.938815	0	0	0.746845	0.157475	FARP1;FYCO1;UTP6;MCAM;P4HA3;PDLIM5
MET knockout 261 GSE8747	6/300	0.809893	0.938815	0	0	0.746845	0.157475	NQO2;CSRP2;STEAP4;GLO1;ACSL4;NDRG1
CDK8 knockdown 147 GSE32108	6/300	0.809893	0.938815	0	0	0.746845	0.157475	ALAD;ISYNA1;CTSL;PRUNE2;CP;ARPIN
TGFBR1 knockdown 102 GSE27869	6/300	0.809893	0.938815	0	0	0.746845	0.157475	VASP;DDX27;VPS37C;PTPRK;ACPP;ITM2B
ERBB2 knockdown 233 GSE8373	6/300	0.809893	0.938815	0	0	0.746845	0.157475	MAPKAPK2;VPS13A;FAS;KIF21A;ECE1;NDRG1
TGFBR1 activemutant 291 GSE14523	5/300	0.902276	0.993203	0	0	0.619048	0.06366	ZCCHC8;PKP2;DSTN;ATP1B1;MDN1
RAF1 overexpression 220 GSE42964	5/300	0.902276	0.993203	0	0	0.619048	0.06366	MVP;MXRA8;ACADSB;NDRG1;ABCG2
AKT1 knockdown 135 GSE31534	5/300	0.902276	0.993203	0	0	0.619048	0.06366	COL1A2;SGCD;GM2A;COL14A1;PDIA6
FGFR3 knockdown 173 GSE41035	5/300	0.902276	0.993203	0	0	0.619048	0.06366	CDKN2A;SLC11A2;B2M;NES;NFATC4
FGFR3 knockdown 34 GDS4454	5/300	0.902276	0.993203	0	0	0.619048	0.06366	CDKN2A;SLC11A2;B2M;NES;NFATC4
AKT1 knockdown 141 GSE31912	5/300	0.902276	0.993203	0	0	0.619048	0.06366	COL1A1;EHD2;CALD1;MMP2;PLCD1
CDK2 knockdown 146 GSE31912	5/300	0.902276	0.993203	0	0	0.619048	0.06366	GNAO1;MMP2;MED31;AKAP8L;LY75
TRIM24 knockout 298 GDS3087	5/300	0.902276	0.993203	0	0	0.619048	0.06366	ALDH2;CWF19L1;PPIF;APBA3;DCTPP1
KSR2 knockout 60 GSE17923	5/300	0.902276	0.993203	0	0	0.619048	0.06366	IFIH1;MSH3;DDX58;PPIF;USP18
RAGE knockout 267 GDS3755	5/300	0.902276	0.993203	0	0	0.619048	0.06366	ATL3;LOX;VPS4A;SRFBP1;GNG12
ERBB2 druginhibition 8 GDS2139	5/300	0.902276	0.993203	0	0	0.619048	0.06366	URI1;ELF2;OSMR;EGFR;RAD9A
JAK2 knockout 79 GSE26188	5/300	0.902276	0.993203	0	0	0.619048	0.06366	COL2A1;PRUNE2;DDX56;ATP2B4;PLEKHO2
HIPK1 knockout 170 GSE39253	5/300	0.902276	0.993203	0	0	0.619048	0.06366	MMP14;DDX27;ST5;MGST1;CSPG4
DDR1 knockdown 169 GSE39207	4/300	0.959163	0.997576	0	0	0.492601	0.0205385	GNAO1;TFRC;BAG2;ECE1
ABL1 knockdown 137 GSE31534	4/300	0.959163	0.997576	0	0	0.492601	0.0205385	FARP2;CNN1;SGCD;COL14A1
MAPK1 knockdown 131 GSE31534	4/300	0.959163	0.997576	0	0	0.492601	0.0205385	FARP2;CNN1;COL1A2;LOX
MAPK14 knockdown 139 GSE31912	4/300	0.959163	0.997576	0	0	0.492601	0.0205385	MED31;AKAP8L;KIF21A;FAM3C
MAPK1 knockdown 145 GSE31912	4/300	0.959163	0.997576	0	0	0.492601	0.0205385	MMP2;MED31;AKAP8L;PLCD1
ATR knockdown 140 GSE31912	4/300	0.959163	0.997576	0	0	0.492601	0.0205385	SBNO1;URI1;MED31;AKAP8L
PDK1 knockout 80 GSE26290	4/300	0.959163	0.997576	0	0	0.492601	0.0205385	CWF19L1;EOGT;CD248;DDA1
FGFR2 activemutant 59 GSE17916	4/300	0.959163	0.997576	0	0	0.492601	0.0205385	H6PD;DDX31;MICAL2;LGMN
ABL1 knockdown 100 GSE27869	4/300	0.959163	0.997576	0	0	0.492601	0.0205385	MYADM;ECHDC2;PGPEP1;ARFGAP3
HIPK2 defectivemutant 29 GDS4233	4/300	0.959163	0.997576	0	0	0.492601	0.0205385	RFC2;BUD31;DDX31;AATF
ERBB2 knockdown 236 GSE8373	4/300	0.959163	0.997576	0	0	0.492601	0.0205385	MAOA;MSH3;SLC11A2;KIF21A
ITK knockout 242 GSE12465	3/300	0.987039	0.997576	0	0	0.367489	0.00479429	FABP4;CSRP1;FAT1
MAPK14 knockout 13 GDS2693	3/300	0.987039	0.997576	0	0	0.367489	0.00479429	MEPCE;PLAUR;SIL1
EGFR druginhibition 82 GSE27638	3/300	0.987039	0.997576	0	0	0.367489	0.00479429	DDX24;ATP2B4;FAS
CHEK1 knockdown 136 GSE31534	3/300	0.987039	0.997576	0	0	0.367489	0.00479429	COL1A2;DCK;HAUS1
CDK7 knockdown 138 GSE31534	3/300	0.987039	0.997576	0	0	0.367489	0.00479429	CNN1;COL14A1;HAUS1
FGFR3 knockdown 174 GSE41035	3/300	0.987039	0.997576	0	0	0.367489	0.00479429	UCHL1;VCAN;PGLS
CDK4 knockdown 143 GSE31912	3/300	0.987039	0.997576	0	0	0.367489	0.00479429	CALD1;MMP2;AKAP8L
CHEK1 knockdown 142 GSE31912	3/300	0.987039	0.997576	0	0	0.367489	0.00479429	MED31;AKAP8L;PLCD1
ERBB2 druginhibition 6 GDS2139	3/300	0.987039	0.997576	0	0	0.367489	0.00479429	TOR3A;ST5;PKP2
CDK19 knockdown 148 GSE32108	3/300	0.987039	0.997576	0	0	0.367489	0.00479429	ISYNA1;MGP;CD248
VRK1 knockout 64 GSE19329	3/300	0.987039	0.997576	0	0	0.367489	0.00479429	COL2A1;AKAP8L;CDH11
PTK7 knockdown 185 GSE50138	3/300	0.987039	0.997576	0	0	0.367489	0.00479429	PRPS2;RNF213;SIL1
JAK1 knockdown 160 GSE37012	2/300	0.997229	0.999699	0	0	0.243695	0.000676261	PDLIM1;ACADM
PIK3CA mutant 27 GDS4053	1/300	0.999699	0.999699	0	0	0.121204	3.64735e-05	EP400
RET mutant 23 GDS3319	1/300	0.999699	0.999699	0	0	0.121204	3.64735e-05	TMEM59

## Sheet: Proteomics_Drug_Atlas_2023
Term	Overlap	P-value	Adjusted P-value	Old P-value	Old Adjusted P-value	Odds Ratio	Combined Score	Genes
AZ 628 Up	19/145	1.01136e-08	9.88727e-06	0	0	5.70832	105.087	CDA;DTX3L;MVP;COL12A1;AHNAK2;HSPB1;ABAT;CRIP2;PBXIP1;PARP14;PARP9;EHD2;RNF213;FTH1;GPC1;ARHGDIB;CSPG4;IRF9;PLCD1
Mycophenolic Acid Down	19/146	1.13451e-08	9.88727e-06	0	0	5.66308	103.603	NOP14;UTP6;DDX27;RPS19BP1;DDX24;LMO4;DDX56;RBM19;DNTTIP2;DDX54;NOC4L;WDR46;CHAF1A;PDCD11;DHX37;SRFBP1;UTP20;CSPG4;RRP12
MEK162 Up	18/148	7.95754e-08	3.84865e-05	0	0	5.23017	85.4953	CDA;DTX3L;MVP;AHNAK2;ABAT;CRIP2;PBXIP1;IFIT1;PARP14;PARP9;TGFBR3;MMP14;RNF213;FTH1;GPC1;ARHGDIB;IRF9;PLCD1
Bafilomycin A1 Up	18/149	8.83223e-08	3.84865e-05	0	0	5.18997	84.297	COL18A1;NRP1;JUN;SERPINE2;CD81;APLP2;COL12A1;FN1;PLAUR;OSMR;TGFBR3;TMEM59;VCAN;GPC1;FAT1;TIMP2;ITM2B;ITM2C
Celastrol Up	17/147	3.79185e-07	0.000132184	0	0	4.92997	72.8909	NQO1;CEBPB;ANXA1;IFRD1;HSPB1;SORBS1;THBS1;COL2A1;BAG3;CTSL;FTH1;SERPINH1;NF1;TIMP2;BLVRB;PCBD2;CBR3
STK066844 Up	17/149	4.60533e-07	0.000133785	0	0	4.85478	70.8355	SCARB1;NRP1;JUN;CD81;APLP2;COL12A1;IFRD1;MICAL2;TMEM59;VCAN;FTH1;BSG;MYADM;TIMP2;APBA3;B2M;ITM2B
PHA 767491 Up	16/139	8.87273e-07	0.000220931	0	0	4.89627	68.2301	TAGLN;CD81;COL14A1;TPM2;TGFB1I1;FN1;DSTN;SORBS3;COL1A1;DAP;DPP7;ARHGDIB;MYL9;CRLF1;TGM2;S100A10
CCT128930 Up	16/143	1.30092e-06	0.000227598	0	0	4.74108	64.2531	CDA;ISYNA1;H6PD;FN1;GLRX;PBXIP1;TMEM59;MMP14;P2RX4;NF1;IL6ST;PGPEP1;ITM2B;IRF9;PLCD1;ITM2C
Brequinar Down	16/144	1.42836e-06	0.000227598	0	0	4.70379	63.3083	UTP6;DDX27;RPS19BP1;DDX24;IFRD1;DDX56;RBM19;DNTTIP2;DDX54;PTPRK;WDR46;RASSF1;PDCD11;UTP20;RRP12;NES
Dronedarone Down	16/144	1.42836e-06	0.000227598	0	0	4.70379	63.3083	CDA;PON3;NQO2;GLO1;TPM1;HSPB1;SOD2;LGALS3;IRGQ;DAP;RCN1;COL2A1;SCRN1;BAG3;FTH1;B2M
LPA2 An1 Up	16/145	1.56694e-06	0.000227598	0	0	4.66709	62.3821	NRP1;NQO1;FOXC1;H6PD;AHNAK2;PBXIP1;NDRG1;GLG1;DAP;ALDH2;TMED3;ATM;AGA;PCBD2;PGPEP1;SH3D19
Encorafenib Up	16/145	1.56694e-06	0.000227598	0	0	4.66709	62.3821	H6PD;APLP2;IFRD1;AHNAK2;ABAT;PBXIP1;IFIT1;PARP9;TMEM59;ALDH2;FTH1;CPE;IL6ST;ITM2B;PLCD1;ITM2C
Ingenol-3-angelate Up	16/148	2.05828e-06	0.000256256	0	0	4.56031	59.7111	NRP1;JUN;TAP2;PLAUR;MICAL2;SERPINB9;AMPD3;NDRG1;EGFR;TAPBP;HELZ2;IFIH1;GPRC5A;CTSL;APBA3;TGM2
BX 912 Up	16/148	2.05828e-06	0.000256256	0	0	4.56031	59.7111	IKBIP;SERPINE2;COL14A1;IFRD1;FN1;PLAUR;EPDR1;LMO7;ISG15;IGF1R;DAP;MMP14;DPP7;GPRC5A;CTSL;FAS
OSU-03012 Down	15/142	5.69926e-06	0.000639654	0	0	4.43613	53.567	UTP6;DDX27;RPS19BP1;DDX24;DDX56;RBM19;DNTTIP2;DDX54;WDR46;SLC7A1;RASSF1;PDCD11;SRFBP1;UTP20;NES
CHEMBL513147 Down	15/145	7.37174e-06	0.000639654	0	0	4.33308	51.2078	CDA;TPM2;GLO1;HSPB1;GLRX;PBXIP1;SOD2;TAPBP;GM2A;BAG3;ADI1;FKBP7;CSPG4;B2M;NES
Pictilisib Up	15/147	8.71671e-06	0.000639654	0	0	4.26699	49.7116	H6PD;APLP2;TGFB1I1;AHNAK2;FN1;PBXIP1;TMEM59;DAP;P2RX4;CTSL;FAT1;SYNPO;PLCB1;ITM2B;ITM2C
RGFP966 Up	15/147	8.71671e-06	0.000639654	0	0	4.26699	49.7116	JUN;GFPT2;MCAM;FHL1;ABAT;LMO7;SERPINB9;SORBS1;CSRP2;CSPG4;KCTD12;ARHGEF40;CRLF1;PLCD1;TGM2
IC-87114 Down	15/147	8.71671e-06	0.000639654	0	0	4.26699	49.7116	GAMT;FN1;HSPB1;ISG15;HEBP1;NT5C;MMP14;GM2A;ESD;MYADM;FKBP7;PGPEP1;MYL9;IRF9;S100A10
UNC 0631 Up	15/147	8.71671e-06	0.000639654	0	0	4.26699	49.7116	SERPINE2;APLP2;TPM2;TPM1;FHL1;FN1;OSMR;TGFBR3;TMEM59;CTSL;FTH1;FAT1;IL6ST;ITM2B;ITM2C
UNC2250 Up	15/148	9.46766e-06	0.000639654	0	0	4.23469	48.9853	CDA;H6PD;MVP;AHNAK2;PBXIP1;NDRG1;TMEM59;VCAN;P2RX4;FTH1;FAS;PGPEP1;ITM2B;PHLDA3;ITM2C
TCS ERK 11E Up	15/148	9.46766e-06	0.000639654	0	0	4.23469	48.9853	CDA;DTX3L;MVP;AHNAK2;FN1;ABAT;CRIP2;PBXIP1;IFIT1;PARP9;EHD2;MMP14;FTH1;SYNPO;PLCD1
PAC-1 Up	15/148	9.46766e-06	0.000639654	0	0	4.23469	48.9853	COL18A1;NRP1;JUN;LRP1;COL14A1;COL12A1;IFRD1;TPM1;LMOD1;PLAUR;NDRG1;FAM107B;DAP;TGM2;S100A10
VE-821 Up	15/149	1.02756e-05	0.000639654	0	0	4.20287	48.2731	NRP1;CEBPB;APLP2;FN1;OSMR;SLC7A1;FAM107B;TMEM59;DAP;FTH1;RBP1;FAT1;IL6ST;ITM2B;ITM2C
Entinostat Up	15/149	1.02756e-05	0.000639654	0	0	4.20287	48.2731	JUN;GFPT2;FN1;ABAT;LMO7;SERPINB9;SORBS1;IGF1R;CSRP2;MAP1A;TIMP2;FKBP7;KCTD12;PLCD1;TGM2
Cediranib Up	15/149	1.02756e-05	0.000639654	0	0	4.20287	48.2731	DTX3L;CD81;ACSL1;APLP2;IDH1;FN1;PBXIP1;OSMR;TMEM59;CTSL;TIMP2;IL6ST;JAK2;ITM2B;ITM2C
Obatoclax Up	15/149	1.02756e-05	0.000639654	0	0	4.20287	48.2731	NRP1;JUN;SERPINE2;APLP2;AHNAK2;PLAUR;OSMR;TMEM59;MMP14;VCAN;FAT1;TIMP2;IL6ST;ITM2B;ITM2C
RG2833 Up	15/149	1.02756e-05	0.000639654	0	0	4.20287	48.2731	CYB5A;JUN;GFPT2;PLA2G4A;ABAT;LMO7;SERPINB9;SORBS1;PTGS1;TGFBR3;CSRP2;ARHGDIB;TIMP2;NES;TGM2
Paricalcitol Up	14/142	2.55356e-05	0.00153174	0	0	4.09987	43.3579	GTF2A1;CEBPB;COL14A1;TGFB1I1;COL12A1;MICAL2;SERPINB9;GPRC5A;FTH1;BSG;MED31;MYADM;TIMP2;CRLF1
GR79236 Down	14/143	2.76325e-05	0.00153174	0	0	4.06787	42.6985	COL14A1;AHNAK2;GLRX;PBXIP1;NDRG1;COL1A1;COL1A2;COL2A1;P2RX4;COL5A1;FTH1;PCBD2;PGPEP1;PLCD1
Radicicol Up	14/143	2.76325e-05	0.00153174	0	0	4.06787	42.6985	TGFB1I1;GPX8;EPDR1;HSPB1;PBXIP1;SORBS1;IFIT1;IGF1R;MMP14;ALDH2;BAG3;GPC1;SERPINH1;CPE
Gedatolisib Up	14/144	2.98791e-05	0.00153174	0	0	4.03637	42.0524	NRP1;COL14A1;COL12A1;IFRD1;AHNAK2;FN1;PLAUR;PBXIP1;IGF1R;TMEM59;MMP14;MYADM;ITM2B;ITM2C
AZD-5438 Up	14/144	2.98791e-05	0.00153174	0	0	4.03637	42.0524	SCARB1;TAGLN;CD81;COL14A1;EPHX1;FN1;CLTB;PDIA6;THBS1;TMEM59;RCN1;DPP7;TGM2;ITM2C
Tozasertib Up	14/144	2.98791e-05	0.00153174	0	0	4.03637	42.0524	COL18A1;H6PD;AHNAK2;FN1;PBXIP1;IFIT1;P2RX4;GM2A;PGPEP1;ITM2B;IRF9;PLCD1;PHLDA3;ITM2C
ICG-001 Up	14/145	3.22845e-05	0.00155789	0	0	4.00536	41.4191	NRP1;COL14A1;ITGA3;IFRD1;AHNAK2;MICAL2;NOL3;SLC7A1;FAM107B;LGALS3;TMEM59;FTH1;ARHGEF40;PGPEP1
JQ-1 Up	14/145	3.22845e-05	0.00155789	0	0	4.00536	41.4191	JUN;OAT;ACSL1;APLP2;GFPT2;DCXR;AHNAK2;SORBS1;HELZ2;ALAD;GM2A;ADI1;FTH1;CKB
STL336112 Up	14/146	3.48581e-05	0.00155789	0	0	3.97481	40.7983	NRP1;JUN;TAGLN;ITGA3;TGFB1I1;MVP;IFRD1;AHNAK2;PLAUR;HELZ2;DAP;VCAN;TIMP2;TGM2
OTSSP167 Up	14/146	3.48581e-05	0.00155789	0	0	3.97481	40.7983	TAGLN;LRP1;COL14A1;SSNA1;FHL1;FN1;EPDR1;THBS1;TPST2;COL1A2;GUK1;PCBD2;MYL9;CRLF1
Ethoxzolamide Up	14/146	3.48581e-05	0.00155789	0	0	3.97481	40.7983	NQO1;CEBPB;NQO2;IFRD1;EPHX1;PGD;RNF213;SESTD1;CTSL;FTH1;GPC1;ANXA6;B2M;CBR3
Dasatinib Up	14/147	3.76098e-05	0.00159888	0	0	3.94472	40.1897	NQO1;FOXC1;H6PD;SERPINE2;IDH1;PBXIP1;FAM107B;TMEM59;ALDH2;CAT;ARHGEF40;PGPEP1;IRF9;PLCD1
Sulforaphane Up	14/147	3.76098e-05	0.00159888	0	0	3.94472	40.1897	NQO1;CEBPB;TAGLN;COL14A1;IFRD1;FN1;KIF14;PTPN21;BAG3;CTSL;FTH1;GPC1;MYL9;CBR3
CGP77675 Up	14/148	4.05501e-05	0.00160634	0	0	3.91508	39.5931	CDA;FOXC1;SERPINE2;APLP2;IDH1;IFRD1;PBXIP1;NDRG1;TMEM59;GPRC5A;DPH6;PGPEP1;ITM2B;ITM2C
NVP-BSK805 Up	14/148	4.05501e-05	0.00160634	0	0	3.91508	39.5931	NRP1;CD81;COL14A1;APLP2;FN1;PLAUR;OSMR;SLC7A1;TMEM59;CTSL;FAT1;IL6ST;ITM2B;ITM2C
AZD7762 Up	14/148	4.05501e-05	0.00160634	0	0	3.91508	39.5931	CDA;H6PD;FN1;CLTB;HSPB1;SOD2;LGALS3;IRGQ;RCN1;ADI1;FTH1;FAS;B2M;PHLDA3
Bosutinib Up	14/149	4.36896e-05	0.00162024	0	0	3.88587	39.008	CD81;COL14A1;APLP2;IDH1;FN1;PBXIP1;OSMR;THBS1;TMEM59;FAT1;TIMP2;ITM2B;PHLDA3;ITM2C
L-779450 Up	14/149	4.36896e-05	0.00162024	0	0	3.88587	39.008	CDA;H6PD;DTX3L;APLP2;MVP;AHNAK2;ABAT;PBXIP1;IFIT1;PARP9;FTH1;IRF9;PLCD1;ITM2C
Bafetinib Up	14/149	4.36896e-05	0.00162024	0	0	3.88587	39.008	APLP2;IDH1;AHNAK2;ABAT;PBXIP1;IFIT1;TMEM59;CTSL;FAT1;CPE;ITM2B;IRF9;EPHB3;ITM2C
Ruboxistaurin Up	14/150	4.70399e-05	0.00167328	0	0	3.8571	38.4341	JUN;TAGLN;COL14A1;APLP2;FN1;CRIP1;TMEM59;FTH1;EZR;IL6ST;B2M;ITM2B;PFN2;ITM2C
WH-4-023 Up	14/150	4.70399e-05	0.00167328	0	0	3.8571	38.4341	COL14A1;APLP2;IDH1;FN1;PBXIP1;OSMR;TMEM59;DAP;CTSL;FAT1;IL6ST;PGPEP1;ITM2B;ITM2C
FR 180204 Up	13/140	9.17769e-05	0.00319934	0	0	3.82977	35.6021	CDA;SSNA1;TPM1;AHNAK2;ABAT;PBXIP1;NOL3;CRIP1;DDA1;EHD2;DAP;MMP14;B2M
RRD-251 Up	13/141	9.87032e-05	0.00337333	0	0	3.79966	35.0457	CDA;NQO1;TPM2;TPM1;CLTB;OSMR;SOD2;FSTL1;LGALS3;GM2A;BAG3;FTH1;B2M
BMS-536924 Up	13/142	0.000106077	0.00348852	0	0	3.77001	34.5006	CDA;ISYNA1;H6PD;COL14A1;FN1;ABAT;PBXIP1;PARP9;MMP14;FAS;ITM2B;PLCD1;PHLDA3
Debio-1347 Down	13/142	0.000106077	0.00348852	0	0	3.77001	34.5006	UTP6;DDX27;RPS19BP1;DDX24;DDX56;RBM19;DNTTIP2;DDX54;WDR46;PDCD11;SRFBP1;UTP20;RRP12
Vidofludimus Down	13/143	0.000113921	0.00349346	0	0	3.74081	33.9666	UTP6;DDX27;RPS19BP1;DDX24;DIMT1;DDX56;DNTTIP2;DDX54;OSMR;WDR46;PDCD11;SRFBP1;RRP12
SB 218795 Down	13/143	0.000113921	0.00349346	0	0	3.74081	33.9666	TGFB1I1;SLC11A2;TPM1;PLAUR;ABAT;OSMR;NOL3;DAP;MYADM;ANXA6;KCTD12;XDH;ITM2B
UK 383367 Up	13/143	0.000113921	0.00349346	0	0	3.74081	33.9666	GLTP;COL18A1;NQO2;ELOF1;TPM2;COL12A1;IFRD1;TPM1;HAUS1;DAP;BAG3;FAT1;PGLS
BIX 01294 Up	13/144	0.000122261	0.00349346	0	0	3.71206	33.4433	JUN;COL14A1;APLP2;TGFB1I1;FN1;OSMR;THBS1;TMEM59;GPRC5A;ADAM9;IL6ST;ITM2B;ITM2C
CPI-203 Up	13/144	0.000122261	0.00349346	0	0	3.71206	33.4433	JUN;OAT;APLP2;GFPT2;DCXR;AHNAK2;ABAT;SORBS1;HELZ2;ALAD;P2RX4;ADI1;FTH1
Flavopiridol Up	13/144	0.000122261	0.00349346	0	0	3.71206	33.4433	TAGLN;CD81;COL14A1;TPM2;FHL1;ATP6AP2;MGST1;FN1;CRIP2;PDIA6;DPP7;FTH1;CRLF1
CH5132799 Up	13/144	0.000122261	0.00349346	0	0	3.71206	33.4433	H6PD;SERPINE2;AHNAK2;FN1;PBXIP1;NDRG1;IGF1R;TMEM59;DAP;MMP14;IRF9;PLCD1;CBR3
EPZ004777 Down	13/144	0.000122261	0.00349346	0	0	3.71206	33.4433	JUN;H6PD;FN1;ISG15;CRIP2;NDRG1;CRIP1;THBS1;ACP6;ARHGDIB;TMED3;FKBP7;S100A10
BD 1008 Up	13/145	0.000131123	0.0035161	0	0	3.68375	32.9305	CDA;CMC2;TPM2;GLO1;TGFB1I1;ANTXR1;IRGQ;DAP;RCN1;BAG3;CTSL;TIMP2;NES
BS-181 Up	13/145	0.000131123	0.0035161	0	0	3.68375	32.9305	CD81;COL14A1;CMC2;TGFB1I1;IFRD1;THBS1;USP18;BAG3;CTSL;NF1;KCTD12;PCBD2;MYL9
MRS 2578 Up	13/145	0.000131123	0.0035161	0	0	3.68375	32.9305	PON3;JUN;COL14A1;IFRD1;FN1;THBS1;FAM107B;COL1A1;BAG3;CTSL;SERPINH1;NF1;PCBD2
SB-408124 Down	13/145	0.000131123	0.0035161	0	0	3.68375	32.9305	LRP1;LMO4;VPS37C;CRIP2;PBXIP1;SORBS1;IFIT1;CALD1;FTH1;B2M;CRLF1;PLCD1;CBR3
MK-1775 Up	13/146	0.000140532	0.00364377	0	0	3.65587	32.4278	FARP2;CYB5A;LRP1;AHNAK2;FN1;GLRX;THBS1;LGALS3;GM2A;FAS;SYNPO;PLCD1;PHLDA3
TPPB Up	13/146	0.000140532	0.00364377	0	0	3.65587	32.4278	NRP1;JUN;MVP;AHNAK2;PLAUR;MICAL2;SERPINB9;NDRG1;TAPBP;HELZ2;IFIH1;GPRC5A;CTSL
Ascomycin Up	13/147	0.000150517	0.00364377	0	0	3.6284	31.9351	COL18A1;SERPINE2;APLP2;COL12A1;VPS37C;GLRX;PBXIP1;OSMR;TMEM59;TIMP2;IL6ST;ITM2B;ITM2C
TPCA-1 Up	13/147	0.000150517	0.00364377	0	0	3.6284	31.9351	FOXC1;COL14A1;TGFB1I1;IFRD1;FN1;PBXIP1;SLC7A1;FAM107B;COL1A1;DAP;RCN1;CTSL;FAS
SB 225002 Up	13/147	0.000150517	0.00364377	0	0	3.6284	31.9351	JUN;TAGLN;SERPINE2;COL14A1;IFRD1;FN1;CDCA8;FSTL1;COL1A1;P2RX4;TIMP2;NUDT14;ITM2B
Imiquimod Down	13/147	0.000150517	0.00364377	0	0	3.6284	31.9351	CDA;JUN;CERS5;H6PD;COL14A1;FN1;NOL3;GM2A;CTSL;FTH1;FKBP7;CPE;CBR3
Toceranib Up	13/147	0.000150517	0.00364377	0	0	3.6284	31.9351	COL18A1;H6PD;IFRD1;FN1;COL1A1;EHD2;TMEM59;COL2A1;P2RX4;XDH;ITM2B;IRF9;ITM2C
AZD4547 Up	13/148	0.000161106	0.00374411	0	0	3.60133	31.452	H6PD;AHNAK2;FN1;EPDR1;PBXIP1;NDRG1;TMEM59;DAP;GPRC5A;P2RX4;PGPEP1;ITM2B;ITM2C
STK410283 Up	13/148	0.000161106	0.00374411	0	0	3.60133	31.452	CD81;APLP2;OSMR;TGFBR3;TMEM59;CTSL;GPC1;FAT1;TIMP2;CPE;B2M;ITM2B;ITM2C
Carvedilol Up	13/148	0.000161106	0.00374411	0	0	3.60133	31.452	SCARB1;GTF2A1;CD81;APLP2;TPM2;MGST1;PBXIP1;TMEM59;GPRC5A;ITM2B;IRF9;PHLDA3;ITM2C
Nolatrexed Up	13/149	0.00017233	0.00390093	0	0	3.57467	30.9784	RRM2;TGFB1I1;PLAUR;PARP9;NDRG1;USP18;DAP;MMP14;FAS;PGPEP1;PHLDA3;S100A10;CBR3
CHEMBL513147 Up	13/149	0.00017233	0.00390093	0	0	3.57467	30.9784	NRP1;COL14A1;APLP2;TGFB1I1;IFRD1;FN1;OSMR;TMEM59;RASSF1;PDLIM2;FTH1;ITM2B;ITM2C
Saracatinib Up	13/150	0.000184219	0.00411659	0	0	3.54839	30.514	NRP1;FOXC1;IDH1;PLAUR;PBXIP1;IFIT1;NDRG1;IFIH1;TMEM59;P2RX4;IRF9;ITM2C;CBR3
Ramelteon Up	12/140	0.000357331	0.00778534	0	0	3.5006	27.7838	LDHB;RCN1;ANXA1;TUBB3;BAG3;TPM2;ARHGDIB;TPM1;EPDR1;PGD;IGF1R;DDA1
Molindone Down	12/140	0.000357331	0.00778534	0	0	3.5006	27.7838	IFIH1;GUK1;FTH1;CMC2;PLAUR;EPDR1;PGLS;FSTL1;XDH;IGF1R;ITM2C;CBR3
PF-3758309 Up	12/142	0.000406803	0.00864704	0	0	3.44639	26.9066	JUN;RCN1;TAGLN;DPP7;COL14A1;GUK1;TPM2;COTL1;FN1;PTPN21;CRLF1;PTGS1
GW 501516 Down	12/142	0.000406803	0.00864704	0	0	3.44639	26.9066	LGALS3;IRGQ;LMO4;CTSL;FTH1;FN1;CLTB;ABAT;KCTD12;PGPEP1;OSMR;ITM2B
Tolvaptan Down	12/144	0.000461938	0.00880811	0	0	3.39382	26.0648	DAP;CERS5;GEMIN2;CMC2;TGFB1I1;FN1;LMOD1;EPDR1;GLRX;EMB;SOD2;HAUS1
Olcegepant Down	12/144	0.000461938	0.00880811	0	0	3.39382	26.0648	PDLIM1;RCN1;DNPEP;BAG3;CMC2;LMOD1;ANXA6;KCTD12;PGPEP1;B2M;FAM107B;DDA1
Silmitasertib Up	12/144	0.000461938	0.00880811	0	0	3.39382	26.0648	TPST2;NRP1;JUN;CEBPB;SSNA1;IFRD1;PLAUR;CPE;FAS;SLU7;PLCD1;PHLDA3
MBX-2982 Up	12/144	0.000461938	0.00880811	0	0	3.39382	26.0648	NRP1;JUN;CEBPB;COL14A1;GEMIN2;IFRD1;AHNAK2;FN1;PLAUR;MICAL2;SLC7A1;FAM107B
UK 356618 Up	12/145	0.000491786	0.00880811	0	0	3.36813	25.6566	COL18A1;NRP1;TMEM59;JUN;COL12A1;IFRD1;FAT1;GLRX;PCBD2;PGPEP1;NDRG1;THBS1
CAY10683 Down	12/145	0.000491786	0.00880811	0	0	3.36813	25.6566	TGFBR3;NRP1;RCN1;H6PD;LRP1;BAG3;FTH1;LMOD1;VPS37C;CPE;GLRX;NDRG1
NU7441 Up	12/145	0.000491786	0.00880811	0	0	3.36813	25.6566	TMEM59;H6PD;P2RX4;COL14A1;APLP2;AHNAK2;PBXIP1;PGPEP1;GLG1;ITM2B;IRF9;ITM2C
Debio-1347 Up	12/145	0.000491786	0.00880811	0	0	3.36813	25.6566	IKBIP;NRP1;CSRP2;RRM2;P2RX4;CD81;TAP1;FAS;NUDT14;NDRG1;PHLDA3;TGM2
AXL1717 Up	12/145	0.000491786	0.00880811	0	0	3.36813	25.6566	JUN;TAGLN;LRP1;COL14A1;COL12A1;FN1;NF1;TIMP2;CDCA8;FSTL1;THBS1;ITM2B
AS 1517499 Up	12/146	0.000523242	0.00880811	0	0	3.34282	25.2566	DAP;TAGLN;DPP7;CD81;COL14A1;GUK1;FHL1;COTL1;FN1;TMED3;PCBD2;THBS1
NVP-BEP800 Up	12/146	0.000523242	0.00880811	0	0	3.34282	25.2566	ANXA1;ALDH2;BAG3;SERPINH1;TIMP2;GPX8;HSPB1;FAS;PBXIP1;SORBS1;IFIT1;PHLDA3
Simvastatin Up	12/146	0.000523242	0.00880811	0	0	3.34282	25.2566	HELZ2;CDA;TMEM59;JUN;APLP2;MVP;AHNAK2;TIMP2;CPE;NDRG1;ITM2B;ITM2C
Filanesib Down	12/146	0.000523242	0.00880811	0	0	3.34282	25.2566	CEBPB;PDLIM2;RRM2;RPS19BP1;PDCD11;DDX24;DDX56;DHX37;DDX10;SRFBP1;SNX8;WDR46
L-165041 Down	12/146	0.000523242	0.00880811	0	0	3.34282	25.2566	CYB5A;DAP;TGFB1I1;TPM1;EPDR1;CPE;ABAT;GLRX;IFIT1;B2M;NDRG1;IRF9
BQ-788 Down	12/146	0.000523242	0.00880811	0	0	3.34282	25.2566	TMEM59;ALDH2;GEMIN2;IFRD1;TMED3;CRIP2;OSMR;NDRG1;SLC7A1;THBS1;ITM2B;S100A10
6-Mercaptopurine Down	12/146	0.000523242	0.00880811	0	0	3.34282	25.2566	COL1A1;SCARB1;TMEM59;P2RX4;COL14A1;CTSL;TGFB1I1;FN1;TMED3;CRIP2;THBS1;TAPBP
BMS 754807 Up	12/147	0.000556373	0.00880811	0	0	3.31789	24.8645	TMEM59;JUN;H6PD;MAOA;RBP1;FAT1;FAS;GLRX;PGPEP1;NDRG1;PLCD1;PHLDA3
KH7 Up	12/147	0.000556373	0.00880811	0	0	3.31789	24.8645	COL18A1;NRP1;GPRC5A;COL12A1;IFRD1;MYADM;PLAUR;MICAL2;PCBD2;NDRG1;SLC7A1;TGM2
LY2801653 Up	12/147	0.000556373	0.00880811	0	0	3.31789	24.8645	MMP14;FOXC1;TAGLN;H6PD;DPP7;SERPINE2;FTH1;MYADM;FN1;DSTN;PDLIM5;MYL9
YK-4-279 Down	12/147	0.000556373	0.00880811	0	0	3.31789	24.8645	CEBPB;ORC6;PDLIM2;RRM2;PDCD11;DTX3L;TPM2;DDX56;DHX37;DDX10;SRFBP1;UTP20
G-1 Up	12/147	0.000556373	0.00880811	0	0	3.31789	24.8645	JUN;TAGLN;SERPINE2;COL14A1;COL12A1;IFRD1;FHL1;FN1;TIMP2;CDCA8;THBS1;ITM2B
Eltrombopag Up	12/147	0.000556373	0.00880811	0	0	3.31789	24.8645	CDA;COL18A1;VCAN;ORC6;ELOF1;RRM2;LYRM4;COL12A1;NAF1;JAK2;NOL3;EZH2
Momelotinib Up	12/147	0.000556373	0.00880811	0	0	3.31789	24.8645	NRP1;TMEM59;DAP;CCNT1;SERPINE2;GM2A;COL14A1;FTH1;TMED3;MYL9;ITM2B;ITM2C
Fedratinib Up	12/147	0.000556373	0.00880811	0	0	3.31789	24.8645	TMEM59;P2RX4;CD81;COL14A1;APLP2;DCXR;FAT1;SORBS1;IL6ST;PGPEP1;ITM2B;ITM2C
SP600125 Down	12/147	0.000556373	0.00880811	0	0	3.31789	24.8645	TGFBR3;JUN;DAP;TAGLN;APPBP2;BAG3;FTH1;FN1;CLTB;OSMR;ITM2B;PLCD1
Amsacrine Up	12/147	0.000556373	0.00880811	0	0	3.31789	24.8645	TMEM59;MMP14;RRM2;CTSL;APLP2;FAT1;FAS;IL6ST;OSMR;ITM2B;EPHB3;ITM2C
Vemurafenib Up	12/147	0.000556373	0.00880811	0	0	3.31789	24.8645	NRP1;DAP;CEBPB;SERPINE2;CTSL;ITGA3;IFRD1;PLAUR;MICAL2;NDRG1;EGFR;TGM2
MI-773 Up	12/148	0.00059125	0.00880811	0	0	3.29332	24.4802	IKBIP;CDA;ISYNA1;PDLIM2;FTH1;MVP;AHNAK2;TAP1;FAS;ABAT;CRIP2;PGPEP1
Sunitinib Up	12/148	0.00059125	0.00880811	0	0	3.29332	24.4802	TMEM59;H6PD;COL14A1;APLP2;TGFB1I1;IFRD1;MYADM;FN1;PBXIP1;OSMR;ITM2B;ITM2C
CHEMBL200403 Up	12/148	0.00059125	0.00880811	0	0	3.29332	24.4802	COL1A1;JUN;TAGLN;COL14A1;FTH1;FN1;TIMP2;EPDR1;CDCA8;FSTL1;ITM2B;PHLDA3
SD-208 Up	12/148	0.00059125	0.00880811	0	0	3.29332	24.4802	COL1A1;TGFBR3;JUN;GM2A;DTX3L;NF1;PLAUR;GLRX;DCTPP1;IRF9;TGM2;TTC39B
Berzosertib Up	12/148	0.00059125	0.00880811	0	0	3.29332	24.4802	NRP1;TMEM59;CD81;CTSL;APLP2;FAT1;PLAUR;IL6ST;OSMR;NDRG1;ITM2B;ITM2C
Enzastaurin Down	12/148	0.00059125	0.00880811	0	0	3.29332	24.4802	HELZ2;IFIH1;EHD2;GPRC5A;FTH1;ARHGDIB;AHNAK2;TIMP2;PLAUR;PBXIP1;PARP9;NDRG1
TNP-470 Up	12/148	0.00059125	0.00880811	0	0	3.29332	24.4802	NQO1;BAG3;FTH1;IFRD1;MGST1;NF1;EPDR1;FAS;GLRX;ITM2B;ITM2C;CBR3
Nilotinib Up	12/148	0.00059125	0.00880811	0	0	3.29332	24.4802	IFIH1;DAP;DTX3L;MAP1A;AHNAK2;NF1;ABAT;IFIT1;PARP9;B2M;CRIP1;PHLDA3
SP2509 Up	12/149	0.000627944	0.00897136	0	0	3.26911	24.1034	IKBIP;COL18A1;TMEM59;JUN;CSRP2;RRM2;COL12A1;TIMP2;PLAUR;FAS;NDRG1;PHLDA3
GSK-923295 Up	12/149	0.000627944	0.00897136	0	0	3.26911	24.1034	TMEM59;DAP;COL14A1;FTH1;IFRD1;FN1;TIMP2;CDCA8;FAS;POLR3H;FSTL1;ITM2B
Lapatinib Up	12/149	0.000627944	0.00897136	0	0	3.26911	24.1034	NRP1;TMEM59;JUN;DAP;SERPINE2;CTSL;APLP2;PLAUR;OSMR;NDRG1;ITM2B;ITM2C
PX-12 Up	12/149	0.000627944	0.00897136	0	0	3.26911	24.1034	TMEM59;JUN;TAGLN;BAG3;COL12A1;FN1;CDCA8;DNPH1;FSTL1;THBS1;ITM2B;PHLDA3
NVP-BHG712 Up	12/149	0.000627944	0.00897136	0	0	3.26911	24.1034	TGFBR3;TMEM59;CD81;CTSL;APLP2;FAT1;PBXIP1;IL6ST;OSMR;ITM2B;EPHB3;ITM2C
PRT062607 Up	12/150	0.000666529	0.0094452	0	0	3.24526	23.734	TMEM59;P2RX4;CD81;COL14A1;CTSL;APLP2;FN1;FAT1;IL6ST;OSMR;ITM2B;ITM2C
Kaempferide Down	11/141	0.00135382	0.0190299	0	0	3.15311	20.8257	TPST2;PDLIM1;LGALS3;RCN1;COL14A1;CMC2;TGFB1I1;CLTB;HSPB1;CRIP2;B2M
AZD8055 Up	11/142	0.00143334	0.0196717	0	0	3.12887	20.4871	RASSF1;DAP;MMP14;H6PD;GPRC5A;NPEPL1;AHNAK2;MYADM;PBXIP1;PCBD2;NDRG1
Vorinostat Up	11/142	0.00143334	0.0196717	0	0	3.12887	20.4871	ALAD;CSRP2;GM2A;GFPT2;TPM1;MAP1A;ABAT;SERPINB9;PLEKHO2;SORBS1;PLCD1
OSI-027 Up	11/142	0.00143334	0.0196717	0	0	3.12887	20.4871	TMEM59;JUN;DAP;H6PD;AHNAK2;MYADM;PBXIP1;NDRG1;ITM2B;IGF1R;ITM2C
7,3,4-THIF Up	11/143	0.00151665	0.0200072	0	0	3.10501	20.1554	COL18A1;NQO1;JUN;BAG3;TPM2;GPC1;IFRD1;MYADM;FN1;MED19;EMB
SAR7334 Up	11/143	0.00151665	0.0200072	0	0	3.10501	20.1554	TMEM59;P2RX4;FTH1;FN1;TIMP2;PBXIP1;CRIP1;ITM2B;IRF9;ITM2C;SH3D19
Eptifibatide Down	11/144	0.00160388	0.0200072	0	0	3.0815	19.8305	LGALS3;TMEM59;DNPEP;FTH1;MVP;PLAUR;CRIP2;GLRX;PBXIP1;PGPEP1;NDRG1
7,8-Dihydroxyflavone Up	11/144	0.00160388	0.0200072	0	0	3.0815	19.8305	COL18A1;JUN;VCAN;RRM2;TFRC;TPM2;COL12A1;FN1;PLAUR;B2M;PHLDA3
LY2584702 Down	11/144	0.00160388	0.0200072	0	0	3.0815	19.8305	EHD2;NRP1;TMEM59;RCN1;LRP1;BAG3;FTH1;IFRD1;LMOD1;PLAUR;FAM107B
Cilengitide Up	11/144	0.00160388	0.0200072	0	0	3.0815	19.8305	COL14A1;CMC2;TGFB1I1;FHL1;FN1;GLRX;PCBD2;ARHGEF40;PARP9;THBS1;CRLF1
Formestane Down	11/144	0.00160388	0.0200072	0	0	3.0815	19.8305	CDA;LGALS3;CTSL;FTH1;AHNAK2;FN1;GLRX;PCBD2;PGPEP1;IRF9;PLCD1
PF-431396 Up	11/144	0.00160388	0.0200072	0	0	3.0815	19.8305	JUN;DAP;TAGLN;DPP7;LRP1;CD81;COL14A1;MGST1;FN1;THBS1;SORBS3
Trihydroxyisoflavone Down	11/145	0.00169517	0.0200072	0	0	3.05835	19.5122	TPST2;DAP;FTH1;CMC2;TGFB1I1;MYADM;PLAUR;GLRX;NOL3;CRLF1;ITM2C
Vidofludimus Up	11/145	0.00169517	0.0200072	0	0	3.05835	19.5122	IKBIP;TAGLN;CSRP2;PDLIM2;RRM2;GPC1;TAP1;FAS;NUDT14;PLCD1;PHLDA3
MPI-0479605-HCL Up	11/145	0.00169517	0.0200072	0	0	3.05835	19.5122	LGALS3;DAP;GM2A;BAG3;TPM1;MED31;CLTB;FAS;PCBD2;NOL3;FSTL1
Ruxolitinib Down	11/145	0.00169517	0.0200072	0	0	3.05835	19.5122	COL18A1;JUN;CSRP2;DTX3L;ITGA3;GPC1;PAWR;PGLS;ANTXR1;NES;RSL24D1
H-Arg(NO2)-OH Up	11/145	0.00169517	0.0200072	0	0	3.05835	19.5122	TPST2;COL1A2;TPM2;SSNA1;TPM1;FHL1;DNTTIP2;NAF1;B2M;NUDT14;TRMT61A
Mycophenolic Acid Up	11/145	0.00169517	0.0200072	0	0	3.05835	19.5122	IKBIP;ISYNA1;JUN;CSRP2;RRM2;TAP1;FAS;LMO7;ISG15;CRLF1;TGM2
Dimethylfraxetin Down	11/145	0.00169517	0.0200072	0	0	3.05835	19.5122	TPST2;FARP2;COL2A1;CALD1;TGFB1I1;TPM1;PLAUR;DPH6;SYNPO;PGPEP1;NDRG1
SB 525334 Up	11/145	0.00169517	0.0200072	0	0	3.05835	19.5122	GAMT;NRP1;JUN;DAP;CEBPB;GLO1;SLC11A2;PLAUR;MICAL2;NUDT14;NDRG1
Testolactone Up	11/145	0.00169517	0.0200072	0	0	3.05835	19.5122	NQO1;CEBPB;NQO2;CTSL;GPC1;IFRD1;MED31;EPHX1;BLVRB;DCTPP1;CBR3
Crizotinib Down	11/145	0.00169517	0.0200072	0	0	3.05835	19.5122	COL1A1;HELLS;CEBPB;ORC6;COL2A1;RRM2;IFRD1;MACROD1;TTK;ANTXR1;DTL
CCT241533 Down	11/145	0.00169517	0.0200072	0	0	3.05835	19.5122	CDA;IRGQ;TMEM59;RCN1;ALCAM;CSRP2;COL12A1;TPM1;TIMP2;LPP;GLG1
YK-4-279 Up	11/146	0.00179066	0.0200072	0	0	3.03554	19.2003	NPEPL1;BAG3;COL14A1;FTH1;IFRD1;FN1;TIMP2;CDCA8;DSTN;FSTL1;ITM2B
FMK Down	11/146	0.00179066	0.0200072	0	0	3.03554	19.2003	EHD2;RASSF1;LMO4;SSNA1;COL12A1;TPM1;TIMP2;CKB;ARHGEF40;S100A10;CBR3
WAY 170523 Up	11/146	0.00179066	0.0200072	0	0	3.03554	19.2003	IKBIP;COL18A1;NRP1;COL12A1;FHL1;GMPPA;FAT1;FAS;GLRX;ARFGAP3;NDRG1
Perhexiline Up	11/146	0.00179066	0.0200072	0	0	3.03554	19.2003	CTSL;FTH1;APLP2;TGFB1I1;FAT1;GLRX;PBXIP1;IL6ST;OSMR;ITM2B;ITM2C
Quisinostat Up	11/146	0.00179066	0.0200072	0	0	3.03554	19.2003	ALAD;JUN;CSRP2;GM2A;GFPT2;MAP1A;ABAT;SERPINB9;PLEKHO2;SORBS1;PLCD1
L755507 Up	11/146	0.00179066	0.0200072	0	0	3.03554	19.2003	SCARB1;NRP1;TMEM59;CTSL;FTH1;APLP2;FAT1;PBXIP1;OSMR;ITM2B;ITM2C
Evacetrapib Up	11/146	0.00179066	0.0200072	0	0	3.03554	19.2003	DAP;IFRD1;TPM1;PLAUR;GLRX;PBXIP1;SORBS1;SYNPO;IL6ST;DCTPP1;CBR3
PLX-4720 Up	11/146	0.00179066	0.0200072	0	0	3.03554	19.2003	NRP1;JUN;CEBPB;GPRC5A;COL5A1;ITGA3;IFRD1;PLAUR;MICAL2;KCTD15;EGFR
Birabresib Up	11/146	0.00179066	0.0200072	0	0	3.03554	19.2003	HELZ2;ALAD;APPBP2;ADI1;APLP2;GFPT2;DCXR;GLRX;CKB;NDRG1;FAM107B
SGI-1776 Down	11/146	0.00179066	0.0200072	0	0	3.03554	19.2003	CDA;IRGQ;RCN1;NQO2;BAG3;COL14A1;FTH1;PLAUR;HSPB1;CRIP2;B2M
Anamorelin Up	11/147	0.00189049	0.0202149	0	0	3.01306	18.8947	TMEM59;H6PD;ELOF1;TIMP2;PBXIP1;ANTXR1;B2M;MYL9;FSTL1;ITM2B;ITM2C
Chlorsulfuron Down	11/147	0.00189049	0.0202149	0	0	3.01306	18.8947	ALAD;CDA;COL1A2;COL14A1;VPS37C;EPDR1;ARHGEF40;PARP9;ANTXR1;RAD9A;SH3D19
Mavorixafor Up	11/147	0.00189049	0.0202149	0	0	3.01306	18.8947	TMEM59;RRM2;P2RX4;COL12A1;SLC11A2;TIMP2;EMB;ARFGAP3;ITM2B;EGFR;ITM2C
Ispinesib Down	11/147	0.00189049	0.0202149	0	0	3.01306	18.8947	JUN;PDLIM2;RRM2;RPS19BP1;PDCD11;DDX56;DHX37;DDX10;SRFBP1;SNX8;WDR46
Idasanutlin Up	11/147	0.00189049	0.0202149	0	0	3.01306	18.8947	IKBIP;IRGQ;ISYNA1;DAP;MVP;AHNAK2;TAP1;CPE;FAS;NDRG1;PHLDA3
Tetrindole Up	11/148	0.00199481	0.0202149	0	0	2.99091	18.5951	NRP1;TMEM59;P2RX4;COL14A1;APLP2;TGFB1I1;OSMR;NDRG1;ITM2B;IRF9;ITM2C
GSK-923295 Down	11/148	0.00199481	0.0202149	0	0	2.99091	18.5951	PDLIM2;RRM2;RPS19BP1;PDCD11;DDX24;DDX56;DDX10;SRFBP1;UTP20;SNX8;WDR46
KPT-330 Up	11/148	0.00199481	0.0202149	0	0	2.99091	18.5951	TGFBR3;FN1;TAP1;CPE;FAS;GLRX;PBXIP1;CRIP1;PLCD1;EPHB3;PHLDA3
UNC 0638 Up	11/148	0.00199481	0.0202149	0	0	2.99091	18.5951	TMEM59;SERPINE2;CD81;CTSL;APLP2;FAT1;TIMP2;IL6ST;OSMR;ITM2B;ITM2C
Tubastatin A Up	11/148	0.00199481	0.0202149	0	0	2.99091	18.5951	IFIH1;GM2A;MCAM;ARHGDIB;FHL1;FN1;PLAUR;PLA2G4A;LMO7;KCTD12;B2M
JP1302 Up	11/148	0.00199481	0.0202149	0	0	2.99091	18.5951	TMEM59;TAGLN;CD81;GUK1;APLP2;FHL1;FN1;CRIP2;THBS1;ITM2B;ITM2C
Pazopanib Up	11/148	0.00199481	0.0202149	0	0	2.99091	18.5951	NRP1;CEBPB;H6PD;GPRC5A;ITGA3;IFRD1;PBXIP1;NDRG1;FSTL1;IRF9;FAM107B
Volasertib Up	11/148	0.00199481	0.0202149	0	0	2.99091	18.5951	HELZ2;TMEM59;CD81;APLP2;DCXR;CDCA8;SORBS1;OSMR;ITM2B;EPHB3;ITM2C
L-Valyl-L-phenylalanine Up	11/148	0.00199481	0.0202149	0	0	2.99091	18.5951	CYB5A;CSRP2;MAP1A;PLA2G4A;ABAT;LMO7;SERPINB9;GLRX;KCTD12;SORBS1;PLCD1
Reversine Up	11/148	0.00199481	0.0202149	0	0	2.99091	18.5951	TMEM59;MMP14;CTSL;APLP2;FN1;FAT1;CPE;PBXIP1;IL6ST;ITM2B;ITM2C
SB-224289 Up	11/148	0.00199481	0.0202149	0	0	2.99091	18.5951	NRP1;TMEM59;P2RX4;CD81;CTSL;APLP2;FAT1;IL6ST;OSMR;ITM2B;ITM2C
Kb NB 142-70 Up	11/149	0.00210377	0.0208345	0	0	2.96909	18.3015	JUN;DAP;TAGLN;CCNT1;COL14A1;FTH1;TMED3;DNTTIP2;DTL;THBS1;PHLDA3
PP 1 Up	11/149	0.00210377	0.0208345	0	0	2.96909	18.3015	PON3;ISYNA1;FOXC1;H6PD;DTX3L;ABAT;PBXIP1;PGPEP1;B2M;PLCD1;CBR3
Palbociclib Up	11/149	0.00210377	0.0208345	0	0	2.96909	18.3015	HELZ2;IFIH1;COL18A1;H6PD;MVP;AHNAK2;GLRX;SYNPO;PGPEP1;PLCD1;PPIC
ABL127 Up	11/149	0.00210377	0.0208345	0	0	2.96909	18.3015	NRP1;TMEM59;APLP2;GMPPA;AHNAK2;NF1;PLAUR;EPDR1;BLVRB;IRF9;CBR3
H 89 Up	11/150	0.00221751	0.0217141	0	0	2.94757	18.0137	SCARB1;TMEM59;P2RX4;FTH1;IDH1;FN1;GLRX;PBXIP1;NDRG1;ITM2B;ITM2C
Thiothixene Up	11/150	0.00221751	0.0217141	0	0	2.94757	18.0137	TMEM59;ABHD17B;APLP2;FAT1;PBXIP1;IL6ST;OSMR;NDRG1;ITM2B;EPHB3;ITM2C
AA92593 Down	10/135	0.00322026	0.0313571	0	0	2.97615	17.078	GTF2A1;RCN1;FOXC1;BAG3;FTH1;TPM2;MICAL2;PCBD2;FSTL1;S100A10
UPF 648 Down	10/140	0.00417537	0.0397686	0	0	2.86095	15.6738	TPST2;IFIH1;TMEM59;RCN1;BAG3;FTH1;TPM1;SORBS1;ITM2B;PTGS1
ZM 241385 Down	10/140	0.00417537	0.0397686	0	0	2.86095	15.6738	COL1A1;NRP1;GTF2A1;RCN1;BAG3;TPM2;TGFB1I1;MYADM;FN1;JAK2
HX 531 Up	10/140	0.00417537	0.0397686	0	0	2.86095	15.6738	JUN;RCN1;CEBPB;IFRD1;FHL1;FN1;MICAL2;SLC7A1;THBS1;FAM107B
Indapamide Up	10/140	0.00417537	0.0397686	0	0	2.86095	15.6738	COL1A1;CYB5A;FARP1;RASSF1;CMSS1;TPM2;MED19;DNPH1;DCTPP1;USP18
PD 160170 Up	10/142	0.0046148	0.0434789	0	0	2.81731	15.1529	NQO1;PRRC1;CHSY1;EOGT;EPHX1;MGST1;DSTN;BLVRB;PLCB1;CBR3
L-Mimosine Down	10/142	0.0046148	0.0434789	0	0	2.81731	15.1529	NRP1;TMEM59;JUN;DAP;COL14A1;TPM1;LMOD1;PLAUR;NDRG1;ITM2C
RS 67333 Down	10/143	0.00484774	0.0441225	0	0	2.79598	14.9005	JUN;CMC2;TGFB1I1;RBP1;FN1;FSTL1;SLC7A1;THBS1;USP18;FAM107B
10074-G5 Down	10/143	0.00484774	0.0441225	0	0	2.79598	14.9005	JUN;BAG3;FTH1;TPM1;FN1;PBXIP1;IFIT1;IRF9;EPHB3;PHLDA3
ZINC6198410 Up	10/143	0.00484774	0.0441225	0	0	2.79598	14.9005	ATG101;GUK1;ARHGDIB;SBDS;ANXA6;CPE;IL6ST;B2M;FSTL1;EZH2
Tipifarnib Up	10/143	0.00484774	0.0441225	0	0	2.79598	14.9005	IFIH1;COL14A1;FN1;ANXA6;ABAT;ISG15;PCBD2;SORBS1;JAK2;PGPEP1
Tiplaxtinin Down	10/144	0.00508982	0.0441225	0	0	2.77497	14.6533	CDA;CD81;COL14A1;GUK1;CMC2;COL12A1;ANXA6;TIMP2;OSMR;SH3D19
(S)-(-)-Pindolol Down	10/144	0.00508982	0.0441225	0	0	2.77497	14.6533	CDA;DAP;TPM1;FN1;ANXA6;PLAUR;EPDR1;KCTD12;DNPH1;EPHB3
SB 225002 Down	10/144	0.00508982	0.0441225	0	0	2.77497	14.6533	PDLIM2;RRM2;PDCD11;RRAS;DDX24;PLAUR;DDX10;GLRX;SNX8;WDR46
Tacrine Down	10/144	0.00508982	0.0441225	0	0	2.77497	14.6533	MMP14;FN1;PBXIP1;RRP12;IFIT1;PGPEP1;NOL3;NUDT14;THBS1;PTGS1
Probenecid Down	10/144	0.00508982	0.0441225	0	0	2.77497	14.6533	TMEM59;FTH1;SSNA1;FN1;CLTB;ABAT;GLRX;PGPEP1;PLCB1;B2M
ZINC8945 Up	10/144	0.00508982	0.0441225	0	0	2.77497	14.6533	IFIH1;JUN;TAGLN;COL14A1;CTSL;COL12A1;FN1;TIMP2;CDCA8;ITM2B
2,6-Dichlorophenethylamine Down	10/144	0.00508982	0.0441225	0	0	2.77497	14.6533	RCN1;CMC2;TGFB1I1;MED31;FN1;CLTB;VPS37C;EPDR1;ARHGEF40;EPHB3
SKI II Up	10/144	0.00508982	0.0441225	0	0	2.77497	14.6533	NRP1;NQO1;CTSL;COL12A1;GMPPA;TIMP2;PLAUR;ARFGAP3;SIL1;NDRG1
RN-1734 Down	10/144	0.00508982	0.0441225	0	0	2.77497	14.6533	JUN;NPEPL1;COL14A1;PLAUR;HSPB1;IL6ST;SOD2;CRIP1;S100A10;ADAT2
Ethynyl Estradiol Down	10/144	0.00508982	0.0441225	0	0	2.77497	14.6533	PDLIM2;P2RX4;PRUNE2;PRRX2;ARHGEF40;IL6ST;SNX8;CRIP1;IRF9;CRLF1
Rucaparib Down	10/144	0.00508982	0.0441225	0	0	2.77497	14.6533	ZCCHC8;RCN1;CEBPB;ADI1;CTSL;IFRD1;SLC11A2;TIMP2;HSPB1;SLC7A1
LOMEGUATRIB Down	10/145	0.00534128	0.0441225	0	0	2.75427	14.4112	CDA;NRP1;JUN;DTX3L;NF1;ANXA6;TIMP2;PTPN21;SORBS1;MYL9
Cysmethynil Down	10/145	0.00534128	0.0441225	0	0	2.75427	14.4112	CDA;NRP1;GTF2A1;JUN;NQO2;SLC11A2;PLAUR;GLRX;PGPEP1;NDRG1
Huperzine A Down	10/145	0.00534128	0.0441225	0	0	2.75427	14.4112	NQO1;FN1;EPDR1;EMB;PGPEP1;NOL3;NDRG1;DNPH1;RAD9A;SH3D19
NU 7026 Down	10/145	0.00534128	0.0441225	0	0	2.75427	14.4112	IFIH1;CERS5;CEBPB;CTSL;FTH1;IFRD1;TPM1;FN1;PLA2G4A;JAK2
Bicifadine Down	10/145	0.00534128	0.0441225	0	0	2.75427	14.4112	RCN1;GEMIN2;TPM1;MYADM;FN1;PTPN21;IL6ST;PGPEP1;IRF9;ITM2C
Turofexorate Up	10/145	0.00534128	0.0441225	0	0	2.75427	14.4112	TOR3A;VCAN;TUBB3;SESTD1;GFPT2;TIMP2;PBXIP1;ANK3;TLN2;EZR
TAE 226 Up	10/145	0.00534128	0.0441225	0	0	2.75427	14.4112	H6PD;ALDH2;COL14A1;IFRD1;FN1;PBXIP1;NDRG1;THBS1;PLCD1;FAM107B
Baricitinib Down	10/145	0.00534128	0.0441225	0	0	2.75427	14.4112	COL1A1;TAGLN;CSRP2;PDLIM2;MCAM;COL12A1;NF1;PAWR;B2M;PHLDA3
PCI-34051 Up	10/145	0.00534128	0.0441225	0	0	2.75427	14.4112	COL18A1;NRP1;PON3;TAGLN;ATG101;COL14A1;TPM2;COL12A1;TPM1;ITM2B
CBL0137 Up	10/145	0.00534128	0.0441225	0	0	2.75427	14.4112	RCN1;TAGLN;COL14A1;TPM2;MYADM;FN1;DSTN;CRIP2;PCBD2;DNPH1
Vicriviroc Down	10/145	0.00534128	0.0441225	0	0	2.75427	14.4112	TMEM59;JUN;SSNA1;IFRD1;PRUNE2;PLAUR;GLRX;FSTL1;ITM2B;CBR3
BCATc-In2 Down	10/146	0.00560235	0.0441851	0	0	2.73388	14.174	TMEM59;FTH1;MED31;PCBD2;ARHGEF40;NUDT14;ITM2B;PLCD1;EPHB3;ITM2C
Dopamine Up	10/146	0.00560235	0.0441851	0	0	2.73388	14.174	LRP1;TUBB3;TPM2;TPM1;LMOD1;KCTD12;ARHGEF40;APBA3;B2M;NES
Fingolimod Up	10/146	0.00560235	0.0441851	0	0	2.73388	14.174	TMEM59;CD81;CTSL;APLP2;FAT1;IFIT1;OSMR;ITM2B;ITM2C;TAPBP
Tivozanib Up	10/146	0.00560235	0.0441851	0	0	2.73388	14.174	TGFBR3;EHD2;JUN;H6PD;FN1;FAS;GLRX;PBXIP1;IFIT1;ITM2B
VTP-27999 Down	10/146	0.00560235	0.0441851	0	0	2.73388	14.174	NRP1;SERPINE2;TPM1;FHL1;PRRX2;MACROD1;MYADM;ANK3;RSL24D1;XDH
Ibrutinib2 Up	10/146	0.00560235	0.0441851	0	0	2.73388	14.174	NRP1;CTSL;FTH1;IFRD1;FN1;PLAUR;MED19;GLRX;JAK2;CBR3
Entospletinib Down	10/146	0.00560235	0.0441851	0	0	2.73388	14.174	FARP2;LGALS3;FARP1;H6PD;GPC1;AHNAK2;VPS13A;GLRX;IL6ST;SIL1
PNU-120596 Down	10/146	0.00560235	0.0441851	0	0	2.73388	14.174	TMEM59;COL5A1;ITGA3;ACP6;SLC11A2;VPS13A;CRIP2;PGPEP1;NDRG1;ITM2C
Crizotinib Up	10/146	0.00560235	0.0441851	0	0	2.73388	14.174	LGALS3;JUN;DAP;NQO2;GM2A;BAG3;COL14A1;TPM2;PGLS;PHLDA3
SGI-1776 Up	10/146	0.00560235	0.0441851	0	0	2.73388	14.174	FARP2;HELLS;COL2A1;CD81;TGFB1I1;PRIM1;FN1;TMED3;DTL;CRLF1
Trihydroxyisoflavone Up	10/147	0.00587329	0.0446959	0	0	2.71378	13.9416	GAMT;COL18A1;NQO1;GUK1;ACP6;COL12A1;TPM1;PKP2;FAT1;ATM
NS 3763 Down	10/147	0.00587329	0.0446959	0	0	2.71378	13.9416	MMP14;FOXC1;P2RX4;LRP1;CTSL;FN1;CPE;GLRX;WASF2;ITM2B
Eltrombopag Down	10/147	0.00587329	0.0446959	0	0	2.71378	13.9416	TOR3A;PRIM2;TMEM59;JUN;CD81;ADI1;FTH1;BSG;TMEM209;IFIT1
Bisphenol A Down	10/147	0.00587329	0.0446959	0	0	2.71378	13.9416	FARP2;CMC2;TGFB1I1;SSNA1;NF1;MNAT1;AGPAT1;ANTXR1;MYL9;FAM107B
Nutlin3a Up	10/147	0.00587329	0.0446959	0	0	2.71378	13.9416	IKBIP;ISYNA1;MVP;AHNAK2;TAP1;CPE;FAS;ABAT;ANK3;PGPEP1
Ibutamoren Up	10/147	0.00587329	0.0446959	0	0	2.71378	13.9416	TGFBR3;NT5C;TMEM59;LMO4;GUK1;PRRX2;GLRX;PGLS;FSTL1;CBR3
Navarixin Down	10/147	0.00587329	0.0446959	0	0	2.71378	13.9416	LRP1;TGFB1I1;PRRX2;MGST1;FN1;ANXA6;PLAUR;CPE;IFIT1;IRF9
Balicatib Up	10/148	0.00615434	0.0446959	0	0	2.69398	13.714	TMEM59;MMP14;SERPINE2;CTSL;FTH1;TPM1;EPDR1;ANTXR1;ITM2C;LGMN
MLN4924 Up	10/148	0.00615434	0.0446959	0	0	2.69398	13.714	JUN;TAGLN;APPBP2;BAG3;PLAUR;FAS;GLRX;PLEKHO2;NDRG1;DTL
Aliskiren Up	10/148	0.00615434	0.0446959	0	0	2.69398	13.714	CYB5A;CERS5;GM2A;ABHD17B;FTH1;VPS37C;EPDR1;FKBP7;PGLS;RAD9A
ARL 17477 Up	10/148	0.00615434	0.0446959	0	0	2.69398	13.714	COL1A1;TMEM59;APLP2;AHNAK2;IL6ST;OSMR;ANTXR1;NDRG1;ITM2B;ITM2C
GBR 12909 Up	10/148	0.00615434	0.0446959	0	0	2.69398	13.714	NRP1;DAP;CEBPB;H6PD;COL14A1;IFRD1;AHNAK2;CPE;PBXIP1;WASF2
VU 0364739 Up	10/148	0.00615434	0.0446959	0	0	2.69398	13.714	TMEM59;FTH1;APLP2;COL12A1;TIMP2;CPE;GLRX;OSMR;ITM2B;ITM2C
G-1 Down	10/148	0.00615434	0.0446959	0	0	2.69398	13.714	PDLIM2;RRM2;PDCD11;DDX24;DDX56;DHX37;DDX10;SRFBP1;SNX8;WDR46
Lapatinib Down	10/148	0.00615434	0.0446959	0	0	2.69398	13.714	TPST2;HELLS;ORC6;RRM2;ATAD5;LMOD1;CDCA8;TTK;FAM3C;DTL
SPB06189 Up	10/148	0.00615434	0.0446959	0	0	2.69398	13.714	TMEM59;P2RX4;LMO4;COL14A1;FTH1;FHL1;LMOD1;GLRX;IFIT1;ITM2B
Eplerenone Down	10/148	0.00615434	0.0446959	0	0	2.69398	13.714	NRP1;NQO2;P2RX4;CALD1;TGFB1I1;SSNA1;FN1;LMOD1;NUDT14;PFN2
Ribociclib Up	10/148	0.00615434	0.0446959	0	0	2.69398	13.714	IFIH1;GPRC5A;MVP;AHNAK2;ABAT;GLRX;PBXIP1;SYNPO;PLCD1;PPIC
CCT241533 Up	10/148	0.00615434	0.0446959	0	0	2.69398	13.714	NRP1;CD81;COL14A1;FTH1;TGFB1I1;SSNA1;TMED3;PLAUR;ADAR;MYL9
ONX 0914 Up	10/149	0.00644575	0.0458569	0	0	2.67446	13.4909	RASSF1;JUN;LRP1;ATG101;BAG3;IFRD1;PLAUR;OSMR;PHLDA3;PTGS1
EWP-815 Up	10/149	0.00644575	0.0458569	0	0	2.67446	13.4909	JUN;DAP;BAG3;IFRD1;CLTB;KCTD12;JAK2;NOL3;THBS1;USP18
CHEMBL1902935 Down	10/149	0.00644575	0.0458569	0	0	2.67446	13.4909	GTF2A1;DAP;COL14A1;GUK1;SLC11A2;TPM1;PCBD2;IFIT1;FSTL1;PHLDA3
AGK2 Up	10/149	0.00644575	0.0458569	0	0	2.67446	13.4909	COL18A1;JUN;ABHD17B;COL14A1;COL12A1;IFRD1;FN1;PCBD2;OSMR;THBS1
Ispinesib Up	10/149	0.00644575	0.0458569	0	0	2.67446	13.4909	COL1A1;SERPINE2;CTSL;FHL1;FN1;TIMP2;CDCA8;IFIT1;THBS1;ITM2B
CHEMBL2431803 Down	10/150	0.00674777	0.0478104	0	0	2.65522	13.2722	NPEPL1;LMO4;COL14A1;TGFB1I1;MGST1;JAK2;B2M;FSTL1;IGF1R;ITM2C
Pirenzepine Down	15/279	0.00778917	0.0549657	0	0	2.11893	10.2875	FARP1;PON3;CMC2;TGFB1I1;PTPN21;CRIP1;FSTL1;LPP;NDRG1;FAM107B;IGF1R;FOXP1;TPST2;PDLIM1;DAP
Palonosetron Down	9/139	0.0118579	0.0833398	0	0	2.56991	11.3969	NQO1;MMP14;GPRC5A;COL14A1;IFRD1;SLC11A2;PRUNE2;SERPINH1;PLAUR
Actinonin Up	9/140	0.0123857	0.0866998	0	0	2.55016	11.1983	CEBPB;LMO4;FTH1;CMC2;ACP6;IFRD1;SLC7A1;FAM107B;SH3D19
PD 160170 Down	9/141	0.0129308	0.0890845	0	0	2.53071	11.0039	JUN;DAP;DTX3L;TGFB1I1;PLAUR;ATM;CRIP2;CRIP1;ADAT2
Betamethasone Down	9/141	0.0129308	0.0890845	0	0	2.53071	11.0039	COL14A1;FTH1;EPDR1;GLRX;PBXIP1;PGPEP1;NDRG1;IRF9;PLCD1
5-Hydroxyflavone Up	9/141	0.0129308	0.0890845	0	0	2.53071	11.0039	IFIH1;NQO1;DPP7;BSG;TMED3;NAF1;APBA3;B2M;XDH
NNC 26-9100 Down	9/141	0.0129308	0.0890845	0	0	2.53071	11.0039	TPST2;TMEM59;COL2A1;FTH1;MACROD1;TMED3;FAS;ANTXR1;ITM2B
Torasemide Down	9/142	0.0134935	0.0897937	0	0	2.51155	10.8136	NQO1;DAP;RCN1;COL14A1;FTH1;FN1;GLRX;ANTXR1;CBR3
Desvenlafaxine Down	9/142	0.0134935	0.0897937	0	0	2.51155	10.8136	COL1A1;TGFBR3;JUN;NF1;PLAUR;CPE;SORBS1;NDRG1;IRF9
NSC95682 Down	9/142	0.0134935	0.0897937	0	0	2.51155	10.8136	PDLIM1;BAG3;TGFB1I1;PRRX2;LPP;ITM2B;FAM107B;FOXP1;CBR3
Asarone Down	9/142	0.0134935	0.0897937	0	0	2.51155	10.8136	LGALS3;DAP;CTSL;MED31;FN1;IL6ST;DCTPP1;ITM2B;CRLF1
AZ20 Up	9/142	0.0134935	0.0897937	0	0	2.51155	10.8136	TMEM59;GPRC5A;COL14A1;AHNAK2;FKBP7;FAS;PBXIP1;IGF1R;ITM2C
Buspirone Down	9/142	0.0134935	0.0897937	0	0	2.51155	10.8136	GM2A;CD81;COL14A1;FTH1;TPM2;IFRD1;NF1;GLRX;B2M
MK-6892 Down	9/142	0.0134935	0.0897937	0	0	2.51155	10.8136	CDA;MMP14;P2RX4;CMC2;MED31;NF1;B2M;DCTPP1;ITM2B
Bromfenac Up	9/143	0.0140742	0.0897937	0	0	2.49268	10.6273	TPM2;SSNA1;TIMP2;HSPB1;PDLIM5;B2M;DNPH1;DCTPP1;S100A10
Pyr1-Apelin-13 Down	9/143	0.0140742	0.0897937	0	0	2.49268	10.6273	NRP1;TMEM59;FTH1;FN1;GLRX;EMB;DNPH1;DCTPP1;ITM2C
Doramapimod Up	9/143	0.0140742	0.0897937	0	0	2.49268	10.6273	EHD2;JUN;GM2A;ARHGDIB;MICAL2;SORBS1;IFIT1;TGM2;CBR3
NBI-74330 Down	9/143	0.0140742	0.0897937	0	0	2.49268	10.6273	TMEM59;RCN1;BAG3;FN1;FAS;ABAT;GLRX;NOL3;RAD9A
SB-408124 Up	9/143	0.0140742	0.0897937	0	0	2.49268	10.6273	COL1A1;NRP1;RASSF1;JUN;COL2A1;PLAUR;MICAL2;SLC7A1;PFN2
GW311616 Down	9/143	0.0140742	0.0897937	0	0	2.49268	10.6273	LGALS3;CTSL;MYADM;MED19;GLRX;SYNPO;NOL3;B2M;PHLDA3
LDN-192960 Down	9/143	0.0140742	0.0897937	0	0	2.49268	10.6273	LGALS3;PON3;COL5A1;ARHGDIB;GPX8;CPE;DPH6;GLRX;B2M
LOMEGUATRIB Up	9/144	0.0146732	0.0897937	0	0	2.47409	10.4449	DAP;IMPACT;CHSY1;CD81;ADI1;GUK1;GLRX;OSMR;SLC7A1
CAY10550 Down	9/144	0.0146732	0.0897937	0	0	2.47409	10.4449	NRP1;JUN;COL14A1;TPM1;FN1;PLAUR;PARP9;NDRG1;FAM107B
L-Cysteine Down	9/144	0.0146732	0.0897937	0	0	2.47409	10.4449	LYRM4;TPM2;TPM1;MGST1;FN1;RSL24D1;CRIP1;FAM107B;ADAT2
Pimavanserin Up	9/144	0.0146732	0.0897937	0	0	2.47409	10.4449	SCARB1;NRP1;TMEM59;P2RX4;TGFB1I1;ANXA6;B2M;NDRG1;ITM2C
QX 314 Down	9/144	0.0146732	0.0897937	0	0	2.47409	10.4449	GM2A;ABHD17B;CMC2;FN1;EPDR1;SYNPO;NOL3;NDRG1;DNPH1
Acamprosate Down	9/144	0.0146732	0.0897937	0	0	2.47409	10.4449	GLTP;DAP;RRAS;COL14A1;MYADM;CLTB;VPS13A;FAS;NOL3
Olvance Down	9/144	0.0146732	0.0897937	0	0	2.47409	10.4449	DAP;ATAD5;FTH1;BSG;MGST1;FN1;PCBD2;PGPEP1;TAPBP
JP1302 Down	9/144	0.0146732	0.0897937	0	0	2.47409	10.4449	JUN;CEBPB;UTP6;RPS19BP1;PDCD11;DDX56;RRP12;WDR46;LGMN
Phenylboronic Acid Up	9/144	0.0146732	0.0897937	0	0	2.47409	10.4449	IFIH1;CYB5A;TUBB2A;TUBB3;TPM2;TGFB1I1;HSPB1;EZR;IRF9
Erlotinib Up	9/144	0.0146732	0.0897937	0	0	2.47409	10.4449	NRP1;DAP;CEBPB;GPRC5A;ALDH2;IFRD1;PLAUR;MICAL2;SLC7A1
SSR128129E Down	9/144	0.0146732	0.0897937	0	0	2.47409	10.4449	PON3;P2RX4;COL14A1;MICAL2;CPE;CRIP2;GLRX;PBXIP1;DHRS4
Fluticasone Up	9/144	0.0146732	0.0897937	0	0	2.47409	10.4449	EHD2;CYB5A;RASSF1;GPRC5A;COL5A1;MED31;ATM;FSTL1;TTC39B
Ulipristal Up	9/144	0.0146732	0.0897937	0	0	2.47409	10.4449	CYB5A;BAG3;TPM2;TPM1;CPE;GLRX;IL6ST;JAK2;ANTXR1
Oleanolic Acid Down	9/144	0.0146732	0.0897937	0	0	2.47409	10.4449	PON3;MMP14;LRP1;VPS37C;CRIP2;EMB;IFIT1;JAK2;IGF1R
LP-533401 Down	9/144	0.0146732	0.0897937	0	0	2.47409	10.4449	JUN;DAP;MMP14;FTH1;TGFB1I1;PLAUR;IFIT1;SYNPO;NDRG1
Fumagillin Up	9/145	0.0152907	0.0897937	0	0	2.45577	10.2664	NQO1;ARHGDIB;IFRD1;FAS;PLEKHO2;RSL24D1;ITM2B;PHLDA3;ITM2C
MI-773 Down	9/145	0.0152907	0.0897937	0	0	2.45577	10.2664	HELLS;PRIM2;ORC6;CHAF1A;RRM2;ATAD5;CDCA8;TTK;DTL
Ibutilide Up	9/145	0.0152907	0.0897937	0	0	2.45577	10.2664	PRPS2;ATL3;CD81;TPM1;LMO7;SORBS1;ARHGEF40;FOXP1;PFN2
CB 13 Down	9/145	0.0152907	0.0897937	0	0	2.45577	10.2664	JUN;COL14A1;ANXA6;PLAUR;VPS37C;KCTD12;PGPEP1;B2M;PTGS1
CyPPA Up	9/145	0.0152907	0.0897937	0	0	2.45577	10.2664	CDA;JUN;CEBPB;IFRD1;SLC11A2;FN1;PLAUR;VPS13A;KCTD12
HC 067047 Down	9/145	0.0152907	0.0897937	0	0	2.45577	10.2664	TOR3A;JUN;GUK1;SSNA1;FN1;PLAUR;ARHGEF40;SIL1;DUSP9
TC-N 22A Down	9/145	0.0152907	0.0897937	0	0	2.45577	10.2664	COL14A1;SLC11A2;MYADM;FN1;TIMP2;ARHGEF40;NUDT14;MYL9;IRF9
CAL-101 Up	9/145	0.0152907	0.0897937	0	0	2.45577	10.2664	DTX3L;PRRX2;PBXIP1;PCBD2;ARHGEF40;PDLIM5;B2M;IRF9;TAPBP
NVP-BSK805 Down	9/145	0.0152907	0.0897937	0	0	2.45577	10.2664	HELLS;PRIM2;CSRP2;RRM2;ATAD5;TPM2;TTK;NES;DTL
Neurokinin A Down	9/145	0.0152907	0.0897937	0	0	2.45577	10.2664	NQO1;P2RX4;COL14A1;IFRD1;MGST1;FN1;EPDR1;SH3D19;CBR3
Seratrodast Up	9/145	0.0152907	0.0897937	0	0	2.45577	10.2664	TMEM59;CD81;PKP2;FN1;PTPN21;NAF1;NOC4L;B2M;XDH
Ospemifene Up	9/145	0.0152907	0.0897937	0	0	2.45577	10.2664	NRP1;BAG3;COL14A1;CMC2;SSNA1;FN1;GLRX;ANK3;B2M
Epoxomicin Down	9/145	0.0152907	0.0897937	0	0	2.45577	10.2664	ISYNA1;GPC1;FAM3C;KCTD12;PCBD2;CRIP1;GLG1;PLCD1;ADAT2
DY 131 Down	9/146	0.0159272	0.0897937	0	0	2.43772	10.0915	LMO4;ADI1;TPM2;PLAUR;ABAT;EMB;SORBS1;SOD2;DTL
XCT 790 Up	9/146	0.0159272	0.0897937	0	0	2.43772	10.0915	NRP1;VCAN;TAGLN;ITGA3;IFRD1;AHNAK2;MICAL2;SLC7A1;TGM2
4-Nitropiazthiole Up	9/146	0.0159272	0.0897937	0	0	2.43772	10.0915	NQO1;CEBPB;NQO2;BAG3;FTH1;GPC1;BLVRB;PLEKHO2;CBR3
p-Tolylboronic Acid Up	9/146	0.0159272	0.0897937	0	0	2.43772	10.0915	NQO1;DNPEP;TPM2;GLRX;PGLS;NDRG1;DCTPP1;S100A10;HAUS1
GSK2606414 Up	9/146	0.0159272	0.0897937	0	0	2.43772	10.0915	NRP1;CEBPB;GPRC5A;ITGA3;IFRD1;SLC11A2;PLAUR;MICAL2;SLC7A1
TOFA Up	9/146	0.0159272	0.0897937	0	0	2.43772	10.0915	NRP1;JUN;CEBPB;DNPEP;IFRD1;PRRX2;LMOD1;MICAL2;SLC7A1
Rotigotine Down	9/146	0.0159272	0.0897937	0	0	2.43772	10.0915	PON3;IRGQ;TMEM59;JUN;GPRC5A;MYADM;FN1;NOL3;PHLDA3
PF429242 Up	9/146	0.0159272	0.0897937	0	0	2.43772	10.0915	COL18A1;TMEM59;TFRC;GM2A;COL12A1;ITM2B;IRF9;PFN2;ITM2C
Olodaterol Up	9/146	0.0159272	0.0897937	0	0	2.43772	10.0915	ALAD;NRP1;TAGLN;PRUNE2;MYADM;FN1;LMOD1;FKBP7;PFN2
Betamethasone Up	9/146	0.0159272	0.0897937	0	0	2.43772	10.0915	HELLS;CHAF1A;RRM2;SCRN1;CDCA8;NAF1;TTK;B2M;DTL
Duvelisib Up	9/146	0.0159272	0.0897937	0	0	2.43772	10.0915	H6PD;AHNAK2;FN1;VPS37C;FKBP7;PBXIP1;PARP9;NDRG1;IGF1R
Brequinar Up	9/146	0.0159272	0.0897937	0	0	2.43772	10.0915	IKBIP;JUN;CSRP2;TAP1;FAS;ISG15;MYL9;NDRG1;TGM2
Leupeptin Up	9/146	0.0159272	0.0897937	0	0	2.43772	10.0915	TMEM59;GM2A;APLP2;MED31;EZR;IL6ST;OSMR;ITM2B;ITM2C
GS-9620 Down	9/146	0.0159272	0.0897937	0	0	2.43772	10.0915	NPEPL1;GEMIN2;FN1;ANXA6;SYNPO;CRIP1;THBS1;FAM107B;PTGS1
CB-839 Down	9/147	0.0165829	0.0897937	0	0	2.41993	9.92022	VCAN;TPM2;GPC1;PRRX2;PLAUR;NAF1;IFIT1;B2M;NES
Bromopyruvic Acid Up	9/147	0.0165829	0.0897937	0	0	2.41993	9.92022	NQO1;JUN;BAG3;MYADM;FN1;MICAL2;KIF21A;ARHGEF40;NES
UK 383367 Down	9/147	0.0165829	0.0897937	0	0	2.41993	9.92022	PDLIM1;TOR3A;GTF2A1;FTH1;MYADM;MGST1;PLAUR;IGF1R;S100A10
S107 Down	9/147	0.0165829	0.0897937	0	0	2.41993	9.92022	TGFBR3;COL14A1;GUK1;GLRX;SYNPO;PLCB1;NOL3;EPHB3;CBR3
Darunavir Down	9/147	0.0165829	0.0897937	0	0	2.41993	9.92022	JUN;NQO2;GM2A;FTH1;GLRX;SORBS1;PGPEP1;NOL3;MYL9
UNC2881 Down	9/147	0.0165829	0.0897937	0	0	2.41993	9.92022	TMEM59;CEBPB;GPRC5A;RRM2;TPM2;TIMP2;PBXIP1;NES;ITM2C
PDE-9i Down	9/147	0.0165829	0.0897937	0	0	2.41993	9.92022	CTSL;FTH1;AHNAK2;GLRX;PBXIP1;PCBD2;B2M;NDRG1;PLCD1
AR-C155858 Down	9/147	0.0165829	0.0897937	0	0	2.41993	9.92022	TGFBR3;LGALS3;GTF2A1;CALD1;TPM2;GLRX;IFIT1;SYNPO;NOL3
TAK-779 Down	9/147	0.0165829	0.0897937	0	0	2.41993	9.92022	NRP1;JUN;SERPINE2;TPM2;GPC1;PLAUR;PTPN21;PGLS;B2M
Ibutamoren Down	9/147	0.0165829	0.0897937	0	0	2.41993	9.92022	NRP1;NQO1;GPRC5A;TPM2;SSNA1;BSG;SLC11A2;B2M;IGF1R
Iloprost Down	9/147	0.0165829	0.0897937	0	0	2.41993	9.92022	NRP1;NPEPL1;COL14A1;IFRD1;FN1;PGLS;IL6ST;CRIP1;THBS1
GSK-1070916 Up	9/147	0.0165829	0.0897937	0	0	2.41993	9.92022	TMEM59;CD81;APLP2;FAT1;PBXIP1;OSMR;ITM2B;IRF9;ITM2C
Pentadecanoyl EA Up	9/148	0.0172581	0.0897937	0	0	2.40239	9.75245	CYB5A;NF1;VPS37C;MED19;ARHGEF40;NOL3;DCTPP1;GLG1;ADAT2
SCH 530348 Up	9/148	0.0172581	0.0897937	0	0	2.40239	9.75245	TMEM59;IDH1;LMOD1;DPH6;PBXIP1;OSMR;GLG1;ITM2B;ITM2C
(4-Chlorobenzyl)pyridine Down	9/148	0.0172581	0.0897937	0	0	2.40239	9.75245	OAT;COL14A1;FN1;TIMP2;PAWR;PTPRK;PDLIM5;RSL24D1;XDH
Isoproterenol Down	9/148	0.0172581	0.0897937	0	0	2.40239	9.75245	IFIH1;CTSL;TPM2;TGFB1I1;TPM1;FN1;GLRX;PGPEP1;ITM2B
SB 216763 Down	9/148	0.0172581	0.0897937	0	0	2.40239	9.75245	EHD2;TMEM59;GPRC5A;DTX3L;AHNAK2;TIMP2;CRIP2;PBXIP1;PARP9
Cyclopamine Up	9/148	0.0172581	0.0897937	0	0	2.40239	9.75245	TPST2;SCARB1;TMEM59;FTH1;IDH1;FN1;ACSL4;ITM2B;ITM2C
MLN 8237 Up	9/148	0.0172581	0.0897937	0	0	2.40239	9.75245	LGALS3;COL14A1;SSNA1;CLTB;KIF14;CDCA8;FAS;LMO7;PHLDA3
GSK2334470 Up	9/148	0.0172581	0.0897937	0	0	2.40239	9.75245	TMEM59;H6PD;COL14A1;AHNAK2;GLRX;PBXIP1;NDRG1;ITM2C;SH3D19
mL167 Down	9/148	0.0172581	0.0897937	0	0	2.40239	9.75245	NRP1;RRM2;COL14A1;TPM2;MCAM;FN1;NF1;NES;EPHB3
AZ505 Up	9/148	0.0172581	0.0897937	0	0	2.40239	9.75245	TMEM59;DNPEP;FTH1;APLP2;FAT1;PLAUR;OSMR;ITM2B;ITM2C
Zosuquidar Up	9/148	0.0172581	0.0897937	0	0	2.40239	9.75245	SCARB1;NRP1;CTSL;FTH1;FN1;LMOD1;TIMP2;NOL3;ANTXR1
BMS-911543 Down	9/148	0.0172581	0.0897937	0	0	2.40239	9.75245	JUN;VCAN;COL14A1;COL12A1;VPS37C;GLRX;SORBS1;ANTXR1;FSTL1
Tazarotene2 Up	9/148	0.0172581	0.0897937	0	0	2.40239	9.75245	CPNE8;FOXC1;GPRC5A;MICAL2;CPE;B2M;DNPH1;DCTPP1;HAUS1
Telmisartan Down	9/148	0.0172581	0.0897937	0	0	2.40239	9.75245	GAMT;NT5C;FARP2;ISYNA1;MMP14;LRP1;GLO1;ESD;HSPB1
EIPA Up	9/149	0.0179532	0.0914983	0	0	2.38511	9.58812	NRP1;CEBPB;P2RX4;CTSL;IFRD1;PLAUR;OSMR;ITM2B;ITM2C
Clozapine Up	9/149	0.0179532	0.0914983	0	0	2.38511	9.58812	SCARB1;CYB5A;TMEM59;PLAUR;PGLS;PARP9;NDRG1;ITM2B;TAPBP
STL321288 Up	9/149	0.0179532	0.0914983	0	0	2.38511	9.58812	VCAN;FTH1;IFIT1;SYNPO;PPP1R12B;ANTXR1;NUDT14;CRLF1;ADAT2
Ro-3306 Up	9/149	0.0179532	0.0914983	0	0	2.38511	9.58812	ISYNA1;CD81;SSNA1;IFRD1;FKBP7;CDCA8;SLU7;PLCD1;PHLDA3
AGK2 Down	9/149	0.0179532	0.0914983	0	0	2.38511	9.58812	LGALS3;MMP14;GM2A;GLO1;GPC1;MED31;CLTB;VPS37C;NUDT14
PLX-4720 Down	9/149	0.0179532	0.0914983	0	0	2.38511	9.58812	TGFBR3;EHD2;TMEM59;OAT;COL14A1;ISG15;IFIT1;MYL9;ITM2B
Abemaciclib Up	9/149	0.0179532	0.0914983	0	0	2.38511	9.58812	TMEM59;JUN;CD81;APLP2;FN1;FAT1;OSMR;ITM2B;ITM2C
BMS-536924 Down	9/150	0.0186684	0.0943162	0	0	2.36807	9.42711	NRP1;JUN;CEBPB;ORC6;RRM2;CDCA8;TTK;NES;DTL
KU-60019 Up	9/150	0.0186684	0.0943162	0	0	2.36807	9.42711	TMEM59;H6PD;P2RX4;FTH1;APLP2;PBXIP1;ITM2B;PLCD1;ITM2C
Nutlin3a Down	9/150	0.0186684	0.0943162	0	0	2.36807	9.42711	HELLS;ORC6;RRM2;ATAD5;NCAPG2;CDCA8;TTK;NCAPD3;DTL
Metyrapone Up	8/137	0.0296573	0.149401	0	0	2.29778	8.0837	PDLIM1;GTF2A1;RCN1;BAG3;TPM2;TPM1;PCBD2;NES
Dicyclohexylamine Down	8/139	0.0319399	0.157023	0	0	2.26247	7.79171	RCN1;BAG3;COL14A1;TPM2;TPM1;EPDR1;NES;RAD9A
ZJ 43 Up	8/139	0.0319399	0.157023	0	0	2.26247	7.79171	CDA;RCN1;BAG3;TPM2;TGFB1I1;FN1;ANTXR1;RSL24D1
Calcipotriol Up	8/140	0.033125	0.157023	0	0	2.24521	7.65048	CEBPB;ELOF1;DNPEP;TIMP2;PLAUR;PGPEP1;DCTPP1;CRLF1
Ivacaftor Up	8/141	0.0343396	0.157023	0	0	2.22821	7.51232	NRP1;DAP;SERPINE2;COL14A1;CTSL;FHL1;MYADM;THBS1
Atosiban Down	8/141	0.0343396	0.157023	0	0	2.22821	7.51232	RCN1;BAG3;COL14A1;FTH1;FAT1;EPDR1;GLRX;PCBD2
Rupatadine Up	8/141	0.0343396	0.157023	0	0	2.22821	7.51232	NRP1;NQO1;JUN;GPRC5A;PLAUR;ISG15;B2M;SH3D19
STF-31 Up	8/141	0.0343396	0.157023	0	0	2.22821	7.51232	LDHB;ISYNA1;JUN;NONO;EPDR1;KCTD12;EZR;PARP14
OSU-03012 Up	8/142	0.0355842	0.157023	0	0	2.21147	7.37714	IKBIP;TGFBR3;JUN;TPM1;NF1;TAP1;FAS;PHLDA3
4,4-Dichlorobenzil Up	8/143	0.0368589	0.157023	0	0	2.19498	7.24487	VPS37C;EPDR1;KCTD12;IL6ST;B2M;CRIP1;S100A10;DDA1
Actonel Down	8/143	0.0368589	0.157023	0	0	2.19498	7.24487	HELZ2;CDA;LGALS3;CERS5;GUK1;MICAL2;FAS;GLRX
Ibutilide Down	8/143	0.0368589	0.157023	0	0	2.19498	7.24487	NPEPL1;CHSY1;CALD1;IFRD1;MED19;NES;PLCD1;TAPBP
PAP-1 Up	8/143	0.0368589	0.157023	0	0	2.19498	7.24487	NQO1;LRP1;IFRD1;TIMP2;PLAUR;HSPB1;GLRX;CRLF1
KU 55933 Down	8/143	0.0368589	0.157023	0	0	2.19498	7.24487	COL14A1;TPM2;SSNA1;CLTB;MICAL2;ECE1;JAK2;B2M
CHEMBL2041153 Down	8/143	0.0368589	0.157023	0	0	2.19498	7.24487	LGALS3;FTH1;FN1;CLTB;ARHGEF40;MYL9;NDRG1;IRF9
Racecadotril Down	8/143	0.0368589	0.157023	0	0	2.19498	7.24487	IFIH1;NRP1;COL1A2;TPM1;FN1;ARHGEF40;NDRG1;IRF9
Nisoldipine Down	8/143	0.0368589	0.157023	0	0	2.19498	7.24487	JUN;FTH1;ANXA6;CRIP2;KCTD12;MYL9;IRF9;S100A10
Zafirlukast Up	8/143	0.0368589	0.157023	0	0	2.19498	7.24487	LGALS3;ANXA1;LYRM4;GEMIN2;COTL1;MGST1;CKB;EZR
LY2365109 Down	8/143	0.0368589	0.157023	0	0	2.19498	7.24487	TMEM59;JUN;FTH1;FN1;LMOD1;VPS37C;FAS;JAK2
IWR-1 Up	8/143	0.0368589	0.157023	0	0	2.19498	7.24487	IFIH1;NRP1;FHL1;AHNAK2;PLAUR;PCBD2;SORBS1;CBR3
Iclaprim Up	8/143	0.0368589	0.157023	0	0	2.19498	7.24487	FARP1;SESTD1;CMC2;TPM2;SYNPO;IGF1R;SH3D19;TAPBP
SB290157 Down	8/143	0.0368589	0.157023	0	0	2.19498	7.24487	COL5A1;FN1;PLA2G4A;PGD;B2M;ITM2B;RAD9A;PTGS1
GSK2636771 Up	8/143	0.0368589	0.157023	0	0	2.19498	7.24487	DAP;TPM2;TPM1;MED31;PRRX2;TIMP2;GLRX;DCTPP1
BX 471 Up	8/144	0.0381639	0.157023	0	0	2.17872	7.11542	NRP1;CEBPB;ITGA3;IFRD1;AHNAK2;MICAL2;RSL24D1;SLC7A1
BBL003126 Down	8/144	0.0381639	0.157023	0	0	2.17872	7.11542	CDA;LGALS3;MMP14;LYRM4;TPM2;GLRX;DCTPP1;XDH
Telotristat Up	8/144	0.0381639	0.157023	0	0	2.17872	7.11542	IFIH1;BAG3;COL14A1;GEMIN2;CMC2;PCBD2;FSTL1;PTGS1
Genistein Down	8/144	0.0381639	0.157023	0	0	2.17872	7.11542	NRP1;PON3;CEBPB;DDX56;FN1;WDR46;SLC7A1;IGF1R
Zonisamide Up	8/144	0.0381639	0.157023	0	0	2.17872	7.11542	IFIH1;DAP;COL14A1;CMC2;TGFB1I1;PRRX2;LMOD1;ANTXR1
mL167 Up	8/144	0.0381639	0.157023	0	0	2.17872	7.11542	TPST2;RASSF1;SERPINE2;CALD1;SSNA1;LMOD1;KCTD12;PLCD1
Dichlorphenamide Down	8/144	0.0381639	0.157023	0	0	2.17872	7.11542	DNPEP;ABHD17B;GUK1;SLC11A2;PRUNE2;PLAUR;EPDR1;KCTD12
Methylnaltrexone Down	8/144	0.0381639	0.157023	0	0	2.17872	7.11542	MMP14;CTSL;FN1;EMB;SORBS1;ARHGEF40;PGPEP1;CRIP1
SGC0946 Down	8/144	0.0381639	0.157023	0	0	2.17872	7.11542	TPST2;COL1A2;CMC2;SSNA1;CLTB;CRIP2;BCS1L;DDA1
Minocycline Up	8/144	0.0381639	0.157023	0	0	2.17872	7.11542	GTF2A1;CEBPB;ARHGDIB;IFRD1;CPE;NOL3;SLC7A1;EPHB3
Sitagliptin Down	8/144	0.0381639	0.157023	0	0	2.17872	7.11542	TGFBR3;IRGQ;CLTB;TIMP2;FAS;NDRG1;PLCD1;TAPBP
A 922500 Down	8/144	0.0381639	0.157023	0	0	2.17872	7.11542	IFIH1;TGFBR3;COL2A1;COL14A1;FTH1;FAS;NDRG1;PLCD1
PRT062607 Down	8/144	0.0381639	0.157023	0	0	2.17872	7.11542	IFIH1;HELLS;CEBPB;RRM2;ATAD5;ADI1;TPM2;NES
Nateglinide Down	8/144	0.0381639	0.157023	0	0	2.17872	7.11542	CYB5A;TMEM59;DAP;VPS13A;CPE;IFIT1;JAK2;NOL3
Prucalopride Down	8/144	0.0381639	0.157023	0	0	2.17872	7.11542	NRP1;MMP14;MYADM;SYNPO;DNPH1;CRIP1;THBS1;CRLF1
UMI-77 Down	8/144	0.0381639	0.157023	0	0	2.17872	7.11542	HELLS;CYB5A;NQO1;ADI1;TPM2;TGFB1I1;CRLF1;IGF1R
NP118809 Up	8/144	0.0381639	0.157023	0	0	2.17872	7.11542	NRP1;H6PD;COL14A1;AHNAK2;FN1;KCTD12;NUDT14;PLCD1
Ceritinib Up	8/144	0.0381639	0.157023	0	0	2.17872	7.11542	DAP;TGFB1I1;AHNAK2;FN1;PBXIP1;PARP9;PPIC;CBR3
Torcetrapib Up	8/145	0.0394996	0.157023	0	0	2.16271	6.98872	CALD1;FTH1;TIMP2;PBXIP1;ACADM;IRF9;IWS1;S100A10
Ko143 Up	8/145	0.0394996	0.157023	0	0	2.16271	6.98872	HEBP1;IFIH1;GTF2A1;COL12A1;TPM1;ABAT;PGLS;NES
Compound-1a Down	8/145	0.0394996	0.157023	0	0	2.16271	6.98872	CSRP1;NOL3;APBA3;RSL24D1;DNPH1;XDH;S100A10;ADAT2
Milrinone Up	8/145	0.0394996	0.157023	0	0	2.16271	6.98872	IFIH1;FARP1;EOGT;ANXA6;PLAUR;ARHGEF40;SNX8;IGF1R
Milrinone Down	8/145	0.0394996	0.157023	0	0	2.16271	6.98872	COL1A1;COL14A1;TGFB1I1;TPM1;RBP1;FN1;NDRG1;FSTL1
PD 176252 Up	8/145	0.0394996	0.157023	0	0	2.16271	6.98872	NRP1;DAP;CEBPB;ALDH2;COL14A1;IFRD1;BLVRB;PBXIP1
IU1 Down	8/145	0.0394996	0.157023	0	0	2.16271	6.98872	CTSL;FTH1;TIMP2;GLRX;POLR3H;JAK2;MYL9;GPHN
(S)-Selisistat Down	8/145	0.0394996	0.157023	0	0	2.16271	6.98872	IRGQ;MVP;LMOD1;CPE;GLRX;IL6ST;B2M;USP18
AUDA Down	8/145	0.0394996	0.157023	0	0	2.16271	6.98872	BAG3;CALD1;COL14A1;CTSL;MYADM;CLTB;CPE;PHLDA3
LY411575 Up	8/145	0.0394996	0.157023	0	0	2.16271	6.98872	RASSF1;PDCD11;CD81;ADAR;NAF1;PGPEP1;PDLIM5;B2M
Yohimbine Down	8/145	0.0394996	0.157023	0	0	2.16271	6.98872	NRP1;DAP;P2RX4;GM2A;CALD1;GLRX;SYNPO;ITM2B
STK066844 Down	8/145	0.0394996	0.157023	0	0	2.16271	6.98872	TPST2;GM2A;GOLIM4;GLRX;FAM3C;SIL1;GLG1;LGMN
Rhodanine Derivative38 Down	8/145	0.0394996	0.157023	0	0	2.16271	6.98872	TOR3A;IRGQ;COL5A1;CD81;GUK1;FTH1;GLO1;PGLS
PD173212 Down	8/145	0.0394996	0.157023	0	0	2.16271	6.98872	CHSY1;CD81;MED31;EPDR1;OSMR;FSTL1;WASF2;TTC39B
Baricitinib Up	8/145	0.0394996	0.157023	0	0	2.16271	6.98872	MMP14;FOXC1;SESTD1;PLAUR;IFIT1;PGPEP1;IGF1R;IRF2BPL
GSK2656157 Down	8/145	0.0394996	0.157023	0	0	2.16271	6.98872	TGFBR3;ISYNA1;SESTD1;COL14A1;FN1;IFIT1;ITM2B;PLCD1
Ulipristal Down	8/145	0.0394996	0.157023	0	0	2.16271	6.98872	COL1A1;NT5C;TOR3A;NRP1;LRP1;FN1;EPDR1;EMB
Ripasudil Down	8/145	0.0394996	0.157023	0	0	2.16271	6.98872	COL1A1;NRP1;JUN;CSRP2;PDLIM2;FN1;TIMP2;PAWR
Timapiprant Down	8/145	0.0394996	0.157023	0	0	2.16271	6.98872	NRP1;CEBPB;PRRX2;FN1;NOL3;APBA3;FOXP1;S100A10
9-Aminocamptothecin Up	8/145	0.0394996	0.157023	0	0	2.16271	6.98872	JUN;DAP;TAGLN;DPP7;CD81;COL14A1;GUK1;CRIP2
LDN-192960 Up	8/145	0.0394996	0.157023	0	0	2.16271	6.98872	TMEM59;VCAN;BAG3;COL14A1;PLAUR;FAS;ITM2B;ITM2C
Alfuzosin Up	8/145	0.0394996	0.157023	0	0	2.16271	6.98872	FARP1;COL2A1;SERPINE2;TGFB1I1;APBA3;B2M;CRIP1;CBR3
DPP-IV-IN-2 Up	8/145	0.0394996	0.157023	0	0	2.16271	6.98872	FARP2;COL18A1;DAP;CTSL;TGFB1I1;COL12A1;ARHGEF40;APBA3
AZD 6482 Up	8/145	0.0394996	0.157023	0	0	2.16271	6.98872	DAP;TPM1;AHNAK2;PBXIP1;PARP9;PDLIM5;NDRG1;IRF9
DMB Down	8/145	0.0394996	0.157023	0	0	2.16271	6.98872	LGALS3;DAP;NPEPL1;BAG3;FTH1;MACROD1;PPP1R12B;NOL3
Blonanserin Up	8/146	0.0408661	0.157023	0	0	2.14693	6.8647	NRP1;COL14A1;TPM1;PRUNE2;FN1;NF1;ABAT;KCTD15
HMB-Val-Ser-Leu-VE Down	8/146	0.0408661	0.157023	0	0	2.14693	6.8647	COL14A1;TPM1;TIMP2;PLAUR;PTPN21;PBXIP1;OSMR;SOD2
AZD1152-HQPA Down	8/146	0.0408661	0.157023	0	0	2.14693	6.8647	CDA;NRP1;CEBPB;H6PD;CHSY1;IFRD1;PLCB1;DTL
LUBIPROSTONE Down	8/146	0.0408661	0.157023	0	0	2.14693	6.8647	CDA;NRP1;JUN;COL14A1;CTSL;PLAUR;GLRX;NDRG1
MF63 Down	8/146	0.0408661	0.157023	0	0	2.14693	6.8647	CYB5A;TPM2;ABAT;GLRX;KCTD12;OSMR;MYL9;IGF1R
SAR020106 Down	8/146	0.0408661	0.157023	0	0	2.14693	6.8647	HELLS;RRM2;GPX8;VPS13A;ADAR;ARHGEF40;PPP1R12B;PHLDA3
Mildronate Down	8/146	0.0408661	0.157023	0	0	2.14693	6.8647	LGALS3;TMEM59;CTSL;MED31;VPS37C;PARP9;PLCD1;ITM2C
Tetrindole Down	8/146	0.0408661	0.157023	0	0	2.14693	6.8647	COL1A1;FARP2;PON3;ELOF1;ARHGDIB;TPM1;EPHB3;LGMN
Binospirone Up	8/146	0.0408661	0.157023	0	0	2.14693	6.8647	TPST2;CYB5A;DAP;ADI1;GLO1;MED31;PGLS;HAUS1
Fenoldopam Down	8/146	0.0408661	0.157023	0	0	2.14693	6.8647	COL1A1;SCARB1;GTF2A1;DAP;COL14A1;FTH1;TGFB1I1;FN1
Pitolisant Down	8/146	0.0408661	0.157023	0	0	2.14693	6.8647	JUN;COL14A1;IFRD1;FN1;IFIT1;ARHGEF40;NUDT14;THBS1
AZD4547 Down	8/146	0.0408661	0.157023	0	0	2.14693	6.8647	HELLS;ORC6;RRM2;ATAD5;SESTD1;CDCA8;TTK;DTL
IRAK-1-4 Inhibitor I Up	8/146	0.0408661	0.157023	0	0	2.14693	6.8647	GTF2A1;ISYNA1;H6PD;NSMCE4A;LMOD1;TMED3;PTPN21;SLC7A1
H-Arg(NO2)-OH Down	8/146	0.0408661	0.157023	0	0	2.14693	6.8647	CDA;JUN;RCN1;LRP1;DPH6;AGA;IRF9;PLCD1
Pomalidomide Down	8/146	0.0408661	0.157023	0	0	2.14693	6.8647	NRP1;DAP;COL14A1;MVP;FN1;CSPG4;NDRG1;ARPIN
Tandutinib Up	8/146	0.0408661	0.157023	0	0	2.14693	6.8647	SCARB1;NRP1;TMEM59;FTH1;TIMP2;IFIT1;ITM2B;ITM2C
STK832240 Down	8/146	0.0408661	0.157023	0	0	2.14693	6.8647	GTF2A1;RASSF1;CD81;LMO4;COL14A1;NF1;CPE;NUDT14
Laropiprant Up	8/146	0.0408661	0.157023	0	0	2.14693	6.8647	COL1A1;NQO1;RCN1;BAG3;TPM2;MED31;FAM107B;SH3D19
CC-401 Up	8/146	0.0408661	0.157023	0	0	2.14693	6.8647	CDA;EHD2;ISYNA1;DTX3L;FTH1;TGFB1I1;IFIT1;PHLDA3
Ursodiol Up	8/146	0.0408661	0.157023	0	0	2.14693	6.8647	GTF2A1;P2RX4;CD81;NONO;PDS5B;EZR;B2M;SPTAN1
PDK1-In Up	8/146	0.0408661	0.157023	0	0	2.14693	6.8647	MMP14;H6PD;GPRC5A;AHNAK2;MACROD1;FN1;PBXIP1;FOXP1
Carprofen Up	8/146	0.0408661	0.157023	0	0	2.14693	6.8647	COL1A1;TGFBR3;LMO4;SSNA1;PCBD2;SYNPO;APBA3;NUDT14
Bestatin Up	8/146	0.0408661	0.157023	0	0	2.14693	6.8647	DAP;RCN1;LPGAT1;DNPEP;TPM2;GLRX;NOL3;DCTPP1
INCB 3284 Down	8/146	0.0408661	0.157023	0	0	2.14693	6.8647	JUN;CTSL;FTH1;CLTB;CPE;PCBD2;DNPH1;S100A10
Spironolactone Up	8/146	0.0408661	0.157023	0	0	2.14693	6.8647	TPM2;PLAUR;LMO7;AGPAT1;ANTXR1;B2M;NES;RAD9A
Bisphenol A Up	8/146	0.0408661	0.157023	0	0	2.14693	6.8647	SNX18;TEX30;EPHX1;DSTN;NMT2;ECE1;APBA3;PLCD1
Fumitremorgin C Up	8/146	0.0408661	0.157023	0	0	2.14693	6.8647	IFIH1;FARP2;CYB5A;FARP1;ACSL1;SORBS1;ANTXR1;PFN2
Zotarolimus Down	8/146	0.0408661	0.157023	0	0	2.14693	6.8647	FARP2;CPNE8;GTF2A1;CEBPB;IFRD1;GLRX;TTK;BAZ1A
Gandotinib Up	8/146	0.0408661	0.157023	0	0	2.14693	6.8647	FOXC1;LRP1;COL14A1;FN1;LMO7;ISG15;PTGS1;CBR3
Rolapitant Up	8/146	0.0408661	0.157023	0	0	2.14693	6.8647	DAP;BAG3;COL14A1;TGFB1I1;HSPB1;PBXIP1;NDRG1;IRF9
TCS 1102 Up	8/146	0.0408661	0.157023	0	0	2.14693	6.8647	IFIH1;NRP1;BAG3;FTH1;PRRX2;VPS13A;PPP1R12B;HAUS1
Undecanoic Acid Down	8/147	0.0422637	0.157023	0	0	2.13137	6.74329	CDA;LGALS3;PON3;DTX3L;FTH1;GLRX;AGA;IGF1R
NDT 9513727 Up	8/147	0.0422637	0.157023	0	0	2.13137	6.74329	DAP;MMP14;DTX3L;GFPT2;TIMP2;GLRX;PBXIP1;NDRG1
Fevipiprant Down	8/147	0.0422637	0.157023	0	0	2.13137	6.74329	RCN1;BAG3;FTH1;MVP;FAS;PGPEP1;B2M;NDRG1
Febuxostat Down	8/147	0.0422637	0.157023	0	0	2.13137	6.74329	NRP1;H6PD;COL14A1;MYADM;FN1;PLAUR;GLRX;NUDT14
Zebularine Down	8/147	0.0422637	0.157023	0	0	2.13137	6.74329	TMEM59;TPM1;LMOD1;ANXA6;PLAUR;GLRX;FSTL1;IRF9
NMS-873 Up	8/147	0.0422637	0.157023	0	0	2.13137	6.74329	TMEM59;JUN;COL14A1;COL12A1;IFRD1;FN1;MICAL2;OSMR
Dabigatran Up	8/147	0.0422637	0.157023	0	0	2.13137	6.74329	SCARB1;TMEM59;ACSL1;FTH1;IDH1;ITM2B;IGF1R;ITM2C
Vatalanib Down	8/147	0.0422637	0.157023	0	0	2.13137	6.74329	TPST2;P2RX4;TPM1;PRUNE2;EMB;ARHGEF40;FSTL1;IRF9
ZINC2093649 Down	8/147	0.0422637	0.157023	0	0	2.13137	6.74329	COL1A1;ATG101;CMC2;TGFB1I1;GLRX;OSMR;IRF9;IGF1R
5-Ethynyluracil Down	8/147	0.0422637	0.157023	0	0	2.13137	6.74329	COL1A1;CD81;CALD1;GUK1;FN1;VPS37C;THBS1;ITM2B
Rhodanine Derivative38 Up	8/147	0.0422637	0.157023	0	0	2.13137	6.74329	NPEPL1;COL12A1;TPM1;PRUNE2;ATM;AGA;NOL3;PFN2
SSR128129E Up	8/147	0.0422637	0.157023	0	0	2.13137	6.74329	IRGQ;COL2A1;RPS19BP1;NOL3;B2M;DCTPP1;EPHB3;HAUS1
Thiamet G Up	8/147	0.0422637	0.157023	0	0	2.13137	6.74329	IFIH1;NRP1;GM2A;LRP1;ATAD5;ANXA6;B2M;PFN2
Moxonidine Down	8/147	0.0422637	0.157023	0	0	2.13137	6.74329	JUN;NQO2;FTH1;GLRX;EMB;PGPEP1;PPP1R12B;CBR3
Selisistat Down	8/147	0.0422637	0.157023	0	0	2.13137	6.74329	ISYNA1;DAP;MMP14;FN1;IFIT1;ARHGEF40;PLCD1;IGF1R
LXR-623 Up	8/147	0.0422637	0.157023	0	0	2.13137	6.74329	CDA;DAP;GFPT2;ACSL4;SYNPO;IL6ST;PDLIM5;B2M
Ribociclib Down	8/147	0.0422637	0.157023	0	0	2.13137	6.74329	HELLS;RRM2;ATAD5;IFRD1;CDCA8;B2M;DNPH1;SLC7A1
RK-24466 Up	8/147	0.0422637	0.157023	0	0	2.13137	6.74329	NRP1;JUN;FOXC1;COL14A1;PLAUR;PGPEP1;SIL1;NDRG1
2-PMPA Up	8/147	0.0422637	0.157023	0	0	2.13137	6.74329	NQO1;ABHD17B;ITGA3;NF1;NAF1;B2M;XDH;TRMT61A
PF-8380 Down	8/148	0.0436926	0.157023	0	0	2.11604	6.62442	NRP1;PON3;RASSF1;JUN;NF1;CRIP2;CRIP1;CRLF1
ACA Down	8/148	0.0436926	0.157023	0	0	2.11604	6.62442	LGALS3;FTH1;FHL1;GLRX;AGA;IFIT1;IL6ST;NOL3
4EGI-1 Down	8/148	0.0436926	0.157023	0	0	2.11604	6.62442	TOR3A;PRIM2;DAP;SLC11A2;NF1;LMOD1;GLRX;ANTXR1
CID-2745687 Down	8/148	0.0436926	0.157023	0	0	2.11604	6.62442	MMP14;MED31;PCBD2;NOL3;NDRG1;THBS1;PLCD1;PHLDA3
3-Benzotriazol-propionic Acid Down	8/148	0.0436926	0.157023	0	0	2.11604	6.62442	DAP;TPM2;TPM1;VPS37C;PCBD2;PGPEP1;NOL3;PPIC
FIPI HCl Up	8/148	0.0436926	0.157023	0	0	2.11604	6.62442	NQO1;TMEM59;TGFB1I1;FN1;PARP9;NDRG1;PLCD1;ITM2C
RN486 Up	8/148	0.0436926	0.157023	0	0	2.11604	6.62442	TMEM59;APLP2;FAT1;OSMR;ANTXR1;ITM2B;EPHB3;ITM2C
L-168,049 Down	8/148	0.0436926	0.157023	0	0	2.11604	6.62442	GTF2A1;TGFB1I1;TPM1;VPS37C;IL6ST;NOL3;ITM2B;PTGS1
4-Methylhistamine Down	8/148	0.0436926	0.157023	0	0	2.11604	6.62442	GTF2A1;TMEM59;DAP;FOXC1;GM2A;ADI1;TPM1;FN1
RS 67333 Up	8/148	0.0436926	0.157023	0	0	2.11604	6.62442	IFIH1;NQO2;GM2A;PLAUR;PGLS;B2M;DCTPP1;FOXP1
Quizartinib Up	8/148	0.0436926	0.157023	0	0	2.11604	6.62442	GTF2A1;TAGLN;PLAUR;MICAL2;ISG15;GLRX;OSMR;PARP9
MG-132 Up	8/148	0.0436926	0.157023	0	0	2.11604	6.62442	TMEM59;RASSF1;JUN;ATG101;BAG3;IFRD1;CPE;PHLDA3
STK410281 Up	8/148	0.0436926	0.157023	0	0	2.11604	6.62442	TMEM59;FTH1;APLP2;FAT1;CPE;OSMR;ITM2B;ITM2C
CHEMBL200403 Down	8/148	0.0436926	0.157023	0	0	2.11604	6.62442	CEBPB;PDLIM2;RRM2;RPS19BP1;PDCD11;DDX10;SRFBP1;SNX8
STK368746 Down	8/148	0.0436926	0.157023	0	0	2.11604	6.62442	TGFBR3;DTX3L;ARHGDIB;VPS37C;CRIP2;B2M;XDH;EPHB3
Talazoparib Up	8/148	0.0436926	0.157023	0	0	2.11604	6.62442	IKBIP;MMP14;RRM2;LMOD1;CDCA8;FAS;PGPEP1;PHLDA3
CC-401 Down	8/148	0.0436926	0.157023	0	0	2.11604	6.62442	NRP1;JUN;IFRD1;PLAUR;MICAL2;GLRX;B2M;SLC7A1
GNE-9605 Up	8/148	0.0436926	0.157023	0	0	2.11604	6.62442	TPST2;FARP2;CPNE8;BSG;PRUNE2;TIMP2;EMB;JAK2
GW 441756 Down	8/148	0.0436926	0.157023	0	0	2.11604	6.62442	CHID1;TGFBR3;ISYNA1;COL14A1;FHL1;FN1;PLCD1;IGF1R
Taranabant Up	8/148	0.0436926	0.157023	0	0	2.11604	6.62442	VCAN;COL14A1;FN1;FKBP7;CRIP2;GLRX;PBXIP1;AGPAT1
Ripasudil Up	8/148	0.0436926	0.157023	0	0	2.11604	6.62442	IFIH1;VCAN;FOXC1;LMO4;CALD1;SESTD1;TGFB1I1;MYL9
GW4064 Down	8/148	0.0436926	0.157023	0	0	2.11604	6.62442	IFIH1;TOR3A;TMEM59;ABHD17B;NF1;EPDR1;APBA3;CRLF1
MK2206 Up	8/148	0.0436926	0.157023	0	0	2.11604	6.62442	SCARB1;TMEM59;APLP2;PBXIP1;IL6ST;ITM2B;IRF9;ITM2C
SB 699551 Up	8/148	0.0436926	0.157023	0	0	2.11604	6.62442	TMEM59;RCN1;BAG3;APLP2;TPM2;NES;ITM2B;ITM2C
Encorafenib Down	8/149	0.045153	0.159963	0	0	2.10092	6.50802	JUN;VCAN;RRM2;PLAUR;CDCA8;TTK;NES;DTL
VE-821 Down	8/149	0.045153	0.159963	0	0	2.10092	6.50802	CYB5A;RRM2;TPM2;MCAM;ARHGEF40;MYL9;NES;DTL
Triclabendazole Down	8/149	0.045153	0.159963	0	0	2.10092	6.50802	IRGQ;TMEM59;JUN;GLRX;SYNPO;USP18;IRF9;S100A10
SGC0946 Up	8/149	0.045153	0.159963	0	0	2.10092	6.50802	SCARB1;CTSL;FTH1;APLP2;TGFB1I1;IL6ST;ITM2B;ITM2C
BI 2536 Up	8/149	0.045153	0.159963	0	0	2.10092	6.50802	HELZ2;TMEM59;APLP2;DCXR;CDCA8;SORBS1;ITM2B;ITM2C
Bergenin Down	8/149	0.045153	0.159963	0	0	2.10092	6.50802	TPST2;COL2A1;CTSL;FTH1;FN1;KCTD12;SYNPO;NDRG1
SH-4-54 Down	8/149	0.045153	0.159963	0	0	2.10092	6.50802	TMEM59;COL2A1;P2RX4;FN1;CPE;ABAT;IL6ST;NOL3
Papaverine Down	8/150	0.046645	0.16458	0	0	2.08602	6.39404	TMEM59;RASSF1;JUN;LRP1;GPC1;EPDR1;IL6ST;PFN2
SB 699551 Down	8/150	0.046645	0.16458	0	0	2.08602	6.39404	COL1A1;PON3;DAP;LPGAT1;COL14A1;TGFB1I1;PPP1R12B;THBS1
Benethamine Down	7/139	0.0769444	0.264185	0	0	1.9608	5.02882	GAMT;ELF2;MED31;GLRX;POLR3H;PTPRK;OSMR
BML-277 Down	7/140	0.0792507	0.264185	0	0	1.94596	4.93328	HELLS;DAP;TPM1;PRRX2;FKBP7;SYNPO;PLCD1
SB-222200 Down	7/140	0.0792507	0.264185	0	0	1.94596	4.93328	CALD1;GEMIN2;TPM1;VPS37C;CPE;KCTD12;IRF9
Amsacrine Down	7/140	0.0792507	0.264185	0	0	1.94596	4.93328	GTF2A1;DPP7;GM2A;LMO4;TPM2;LMOD1;TTK
Ascomycin Down	7/141	0.0815968	0.264185	0	0	1.93134	4.83987	PRIM2;GOLIM4;NF1;TMED3;GLG1;PPIC;LGMN
SR 3335 Down	7/141	0.0815968	0.264185	0	0	1.93134	4.83987	NRP1;PRPF38B;PLAUR;MED19;PDS5B;CHD3;NDRG1
Tropicamide Up	7/141	0.0815968	0.264185	0	0	1.93134	4.83987	PKP2;FN1;MED19;ANK3;DUSP9;DCTPP1;PTGS1
NFPS Up	7/141	0.0815968	0.264185	0	0	1.93134	4.83987	FARP2;FOXC1;CHSY1;RBP1;ABAT;FSTL1;PLCD1
3-Deazaneplanocin A Down	7/141	0.0815968	0.264185	0	0	1.93134	4.83987	NRP1;JUN;GPC1;PLAUR;PTPN21;NES;TRIOBP
Paliperidone Down	7/141	0.0815968	0.264185	0	0	1.93134	4.83987	IFIH1;CDA;JUN;RCN1;ABAT;PLCD1;PHLDA3
Mianserin Up	7/141	0.0815968	0.264185	0	0	1.93134	4.83987	TPM2;LMOD1;MICAL2;IL6ST;NES;RAD9A;HAUS1
GS-9620 Up	7/141	0.0815968	0.264185	0	0	1.93134	4.83987	IFIH1;TUBB3;GLO1;SLC11A2;POLR3H;IRF9;S100A10
SR 142948 Down	7/142	0.0839826	0.264185	0	0	1.91693	4.74852	NRP1;RCN1;DNPEP;EPDR1;MED19;S100A10;ADAT2
AK 7 Up	7/142	0.0839826	0.264185	0	0	1.91693	4.74852	NRP1;NQO1;DAP;CEBPB;MICAL2;ARHGEF40;GLG1
Senicapoc Up	7/142	0.0839826	0.264185	0	0	1.91693	4.74852	PRRX2;LMOD1;FKBP7;CRIP2;OSMR;CRLF1;SH3D19
Tizanidine Up	7/142	0.0839826	0.264185	0	0	1.91693	4.74852	FOXC1;CD81;CMC2;TIMP2;PCBD2;B2M;EPHB3
Dantrolene Up	7/142	0.0839826	0.264185	0	0	1.91693	4.74852	GTF2A1;RASSF1;DAP;ELF2;NF1;USP18;PFN2
Mavorixafor Down	7/142	0.0839826	0.264185	0	0	1.91693	4.74852	CHID1;TOR3A;PRIM2;TPM1;SIL1;DUSP9;GLG1
Tipifarnib Down	7/142	0.0839826	0.264185	0	0	1.91693	4.74852	TOR3A;NRP1;RRM2;CD81;GPC1;LMOD1;DTL
JW 480 Up	7/143	0.0864081	0.264185	0	0	1.90274	4.65919	GEMIN2;PRRX2;NF1;IL6ST;IGF1R;PHLDA3;CBR3
3-Hydroxyflavone Down	7/143	0.0864081	0.264185	0	0	1.90274	4.65919	PRIM2;FTH1;GLO1;SSNA1;VPS37C;NOL3;B2M
LY2801653 Down	7/143	0.0864081	0.264185	0	0	1.90274	4.65919	JUN;TPM2;GLO1;TPM1;TIMP2;HSPB1;NES
CHCA Down	7/143	0.0864081	0.264185	0	0	1.90274	4.65919	RCN1;FTH1;CMC2;TPM1;HSPB1;ITM2C;CBR3
GW 3965 Down	7/143	0.0864081	0.264185	0	0	1.90274	4.65919	IFIH1;CDA;IRGQ;BAG3;TPM2;TPM1;FN1
Cilostamide Down	7/143	0.0864081	0.264185	0	0	1.90274	4.65919	PDLIM1;FARP1;DAP;LMO4;TGFB1I1;B2M;DNPH1
SKF 89976A Down	7/143	0.0864081	0.264185	0	0	1.90274	4.65919	P2RX4;TGFB1I1;TPM1;FN1;PTPN21;NOL3;USP18
Ziprasidone Up	7/143	0.0864081	0.264185	0	0	1.90274	4.65919	DAP;CMC2;TGFB1I1;MAP1A;ATM;ANTXR1;EPHB3
TR-14035 Down	7/143	0.0864081	0.264185	0	0	1.90274	4.65919	FTH1;TPM1;FN1;GLRX;PBXIP1;NDRG1;IRF9
Castanospermine Up	7/143	0.0864081	0.264185	0	0	1.90274	4.65919	PDLIM1;RCN1;BAG3;TPM2;TPM1;PCBD2;FAM107B
BAY 61-3606 Down	7/143	0.0864081	0.264185	0	0	1.90274	4.65919	HELLS;ELF2;RRM2;ATAD5;TIMP2;TTK;NES
Midostaurin Up	7/143	0.0864081	0.264185	0	0	1.90274	4.65919	CDCA8;PTPN21;FAS;MYL9;PHLDA3;TAPBP;CBR3
GSK2656157 Up	7/143	0.0864081	0.264185	0	0	1.90274	4.65919	ZCCHC8;NRP1;CEBPB;IFRD1;PLAUR;MICAL2;SLC7A1
Nateglinide Up	7/143	0.0864081	0.264185	0	0	1.90274	4.65919	NT5C;CD81;BSG;MED19;PGPEP1;B2M;XDH
PS-1145 Down	7/143	0.0864081	0.264185	0	0	1.90274	4.65919	NRP1;TMEM59;CEBPB;LRP1;IFRD1;AHNAK2;PLAUR
Testolactone Down	7/143	0.0864081	0.264185	0	0	1.90274	4.65919	CHID1;P2RX4;COL14A1;COL12A1;SLC11A2;PARP9;IRF9
ONX 0914 Down	7/144	0.0888731	0.264185	0	0	1.88875	4.57181	GAMT;CYB5A;ALCAM;GPC1;FAM3C;CRIP1;GLG1
Cetrorelix Up	7/144	0.0888731	0.264185	0	0	1.88875	4.57181	COL18A1;IMPACT;LMO4;ADI1;GUK1;TPM1;ABAT
APD668 Up	7/144	0.0888731	0.264185	0	0	1.88875	4.57181	NRP1;CYB5A;ELOF1;LMO4;MAP1A;SLC7A1;TTC39B
NS 3763 Up	7/144	0.0888731	0.264185	0	0	1.88875	4.57181	CYB5A;SSNA1;PRRX2;B2M;MYL9;USP18;IGF1R
IRAK-1-4 Inhibitor I Down	7/144	0.0888731	0.264185	0	0	1.88875	4.57181	VCAN;TPM2;AHNAK2;PLAUR;IFIT1;NUDT14;NES
L-Menthol Down	7/144	0.0888731	0.264185	0	0	1.88875	4.57181	DAP;MYADM;NF1;PLAUR;PCBD2;SORBS1;NDRG1
TCS-OX2-29 Down	7/144	0.0888731	0.264185	0	0	1.88875	4.57181	RCN1;P2RX4;LRP1;GEMIN2;FTH1;GLRX;ARFGAP3
Bexarotene Down	7/144	0.0888731	0.264185	0	0	1.88875	4.57181	TPM1;PLAUR;VPS37C;CPE;IFIT1;AGPAT1;IRF9
PJ34 Down	7/144	0.0888731	0.264185	0	0	1.88875	4.57181	COL1A1;CD81;GEMIN2;NF1;VPS13A;FAM107B;FOXP1
PP2 Down	7/144	0.0888731	0.264185	0	0	1.88875	4.57181	JUN;CEBPB;TAGLN;GPC1;BSG;IFRD1;SLC7A1
Spironolactone Down	7/144	0.0888731	0.264185	0	0	1.88875	4.57181	CDA;CCNH;LMO4;COL14A1;FTH1;PCBD2;MNAT1
SCH 58261 Up	7/144	0.0888731	0.264185	0	0	1.88875	4.57181	IRGQ;JUN;TPM1;FN1;NF1;PTPN21;SLC7A1
Zotarolimus Up	7/144	0.0888731	0.264185	0	0	1.88875	4.57181	NQO1;H6PD;GUK1;FTH1;AHNAK2;PBXIP1;NDRG1
GSK429286A Down	7/144	0.0888731	0.264185	0	0	1.88875	4.57181	GPRC5A;BSG;PRRX2;EPDR1;SORBS1;B2M;MYL9
Eniporide Up	7/144	0.0888731	0.264185	0	0	1.88875	4.57181	SERPINE2;SESTD1;TPM1;CPE;JAK2;DCTPP1;IRF9
Orteronel Up	7/144	0.0888731	0.264185	0	0	1.88875	4.57181	GAMT;GLO1;GNG12;REXO2;B2M;DCTPP1;HAUS1
Progesterone Up	7/144	0.0888731	0.264185	0	0	1.88875	4.57181	MMP14;VCAN;MED31;PLAUR;EPDR1;PTPN21;GLG1
PF 4800567 Up	7/145	0.0913776	0.264185	0	0	1.87497	4.48634	GTF2A1;TMEM59;ABHD17B;SSNA1;MYADM;POLR3H;PGLS
AT 406 Down	7/145	0.0913776	0.264185	0	0	1.87497	4.48634	PDLIM1;JUN;RCN1;ANXA6;ARHGEF40;PGPEP1;PHLDA3
BLZ-945 Up	7/145	0.0913776	0.264185	0	0	1.87497	4.48634	CYB5A;ELF2;DNPEP;CTSL;PGLS;DCTPP1;ADAT2
NSC735380 Up	7/145	0.0913776	0.264185	0	0	1.87497	4.48634	GTF2A1;VCAN;TPM2;TPM1;NOL3;DCTPP1;CRLF1
HY-50713 Down	7/145	0.0913776	0.264185	0	0	1.87497	4.48634	VCAN;IFIT1;OSMR;ANTXR1;RSL24D1;XDH;SH3D19
(4-Chlorobenzyl)pyridine Up	7/145	0.0913776	0.264185	0	0	1.87497	4.48634	DTX3L;TPM1;ABAT;SORBS1;PARP9;CRLF1;HAUS1
HhAntag Up	7/145	0.0913776	0.264185	0	0	1.87497	4.48634	NRP1;JUN;VCAN;ITGA3;APLP2;PLAUR;MICAL2
Acifran Up	7/145	0.0913776	0.264185	0	0	1.87497	4.48634	FARP1;GM2A;CMC2;MED31;OSMR;SLC7A1;IGF1R
Binospirone Down	7/145	0.0913776	0.264185	0	0	1.87497	4.48634	COL1A1;LMO4;EOGT;EPDR1;DSTN;SNX8;XDH
Anagrelide Down	7/145	0.0913776	0.264185	0	0	1.87497	4.48634	NRP1;FARP1;TMEM59;DAP;LRP1;PRUNE2;NDRG1
GSK2606414 Down	7/145	0.0913776	0.264185	0	0	1.87497	4.48634	JUN;TGFB1I1;FAT1;TTK;IFIT1;B2M;PTGS1
ABT-199 Up	7/145	0.0913776	0.264185	0	0	1.87497	4.48634	RASSF1;TEX30;ATG101;POLR1B;IFRD1;JAK2;B2M
STK155799 Down	7/145	0.0913776	0.264185	0	0	1.87497	4.48634	LGALS3;NRP1;GTF2A1;CYB5A;ANXA1;NF1;MED19
ZINC6198410 Down	7/145	0.0913776	0.264185	0	0	1.87497	4.48634	PON3;CERS5;NPEPL1;CALD1;CLTB;EPDR1;NOL3
CHEMBL1902935 Up	7/145	0.0913776	0.264185	0	0	1.87497	4.48634	LMO4;PRUNE2;PRRX2;MGST1;ACSL4;AGPAT1;FOXP1
BAY 61-3606 Up	7/145	0.0913776	0.264185	0	0	1.87497	4.48634	IKBIP;ISYNA1;DPP7;CCNT1;COL14A1;TMED3;PHLDA3
Anacetrapib Down	7/145	0.0913776	0.264185	0	0	1.87497	4.48634	IFIH1;COL14A1;FN1;PLAUR;EPDR1;CPE;IGF1R
LY2090314 Down	7/145	0.0913776	0.264185	0	0	1.87497	4.48634	EHD2;TMEM59;GPRC5A;ARHGDIB;PBXIP1;IFIT1;NES
ISO-1 Up	7/145	0.0913776	0.264185	0	0	1.87497	4.48634	IFIH1;CTSL;FN1;NF1;JAK2;DNPH1;SH3D19
ABT-737 Up	7/145	0.0913776	0.264185	0	0	1.87497	4.48634	HELLS;RRM2;GMPPA;GLRX;FAM3C;ARFGAP3;FOXP1
MN-64 Up	7/145	0.0913776	0.264185	0	0	1.87497	4.48634	NRP1;COL14A1;FTH1;TPM2;PLAUR;NES;IRF2BPL
Y-33075 Up	7/145	0.0913776	0.264185	0	0	1.87497	4.48634	IKBIP;ISYNA1;TAGLN;DPP7;CCNT1;FN1;PHLDA3
QNZ Down	7/145	0.0913776	0.264185	0	0	1.87497	4.48634	COL1A1;TGFBR3;FTH1;SSNA1;B2M;IRF9;PLCD1
Capsazepine Up	7/145	0.0913776	0.264185	0	0	1.87497	4.48634	COL18A1;NRP1;COL12A1;SERPINH1;FAT1;PLAUR;ARHGEF40
DP-agonist13 Down	7/145	0.0913776	0.264185	0	0	1.87497	4.48634	TMEM59;MMP14;BAG3;NF1;EPDR1;PTPN21;PCBD2
Gedatolisib Down	7/145	0.0913776	0.264185	0	0	1.87497	4.48634	HELLS;RRM2;SESTD1;TPM2;TTK;NES;DTL
Quinidine Up	7/145	0.0913776	0.264185	0	0	1.87497	4.48634	SCARB1;SNX18;ELF2;CD81;FTH1;EPHX1;DPH6
Bosentan Up	7/145	0.0913776	0.264185	0	0	1.87497	4.48634	PON3;ADAR;NAF1;IL6ST;XDH;TRMT61A;CBR3
Linagliptin Down	7/145	0.0913776	0.264185	0	0	1.87497	4.48634	DAP;NPEPL1;GEMIN2;ATP2B4;CRIP2;GLRX;CRIP1
BQ-788 Up	7/145	0.0913776	0.264185	0	0	1.87497	4.48634	GLO1;ARHGDIB;SERPINH1;FKBP7;IFIT1;PGPEP1;B2M
BACE1 Up	7/146	0.0939213	0.264185	0	0	1.86138	4.40273	GTF2A1;CYB5A;TPM2;TPM1;ANTXR1;NES;DCTPP1
GSK4112 Up	7/146	0.0939213	0.264185	0	0	1.86138	4.40273	EHD2;DTX3L;TGFB1I1;TIMP2;ABAT;OSMR;ANTXR1
MLN4924 Down	7/146	0.0939213	0.264185	0	0	1.86138	4.40273	DTX3L;GPC1;FAT1;CSPG4;ANTXR1;SIL1;SH3D19
3-Hydroxyflavone Up	7/146	0.0939213	0.264185	0	0	1.86138	4.40273	ADI1;ANXA6;PCBD2;ARHGEF40;PARP9;IGF1R;RAD9A
HhAntag Down	7/146	0.0939213	0.264185	0	0	1.86138	4.40273	HEBP1;IRGQ;LMO4;GUK1;CRIP2;USP18;HAUS1
TC-O 9311 Up	7/146	0.0939213	0.264185	0	0	1.86138	4.40273	CDA;FOXC1;ABHD17B;MICAL2;CPE;ABAT;EPHB3
LY 344864 Down	7/146	0.0939213	0.264185	0	0	1.86138	4.40273	RCN1;RRAS;COL14A1;TPM2;ESD;FAS;PGPEP1
Vilazodone Down	7/146	0.0939213	0.264185	0	0	1.86138	4.40273	TPST2;NSUN5;TPM2;PRRX2;ATP2B4;ARHGEF40;LGMN
UNC1215 Down	7/146	0.0939213	0.264185	0	0	1.86138	4.40273	CYB5A;LRP1;LMO4;FN1;PCBD2;SYNPO;THBS1
Alogliptin Down	7/146	0.0939213	0.264185	0	0	1.86138	4.40273	NRP1;DAP;COL14A1;CTSL;CMC2;GLRX;SYNPO
Sulfanilamide Down	7/146	0.0939213	0.264185	0	0	1.86138	4.40273	FTH1;ANXA6;CPE;SORBS1;IL6ST;LGMN;TTC39B
Tipiracil Down	7/146	0.0939213	0.264185	0	0	1.86138	4.40273	RASSF1;TPM1;NUDT14;USP18;CRLF1;CBR3;ADAT2
6603-0104 Down	7/146	0.0939213	0.264185	0	0	1.86138	4.40273	ABAT;CRIP2;ARHGEF40;OSMR;NOL3;FSTL1;PLCD1
STK368746 Up	7/146	0.0939213	0.264185	0	0	1.86138	4.40273	NRP1;CEBPB;COL2A1;RPS19BP1;GUK1;FN1;PLAUR
Kaempferide Up	7/146	0.0939213	0.264185	0	0	1.86138	4.40273	TAGLN;GPRC5A;CTSL;PRRX2;APBA3;DTL;PHLDA3
Diethylstilbestrol Down	7/146	0.0939213	0.264185	0	0	1.86138	4.40273	P2RX4;DTX3L;IDH1;MED31;AGPAT1;B2M;TRMT61A
N6022 Up	7/146	0.0939213	0.264185	0	0	1.86138	4.40273	CALD1;GEMIN2;TGFB1I1;ACP6;ABAT;IL6ST;ANTXR1
Ruboxistaurin Down	7/146	0.0939213	0.264185	0	0	1.86138	4.40273	NRP1;CEBPB;RRM2;PLAUR;CDCA8;TTK;FAM107B
Icatibant Down	7/146	0.0939213	0.264185	0	0	1.86138	4.40273	JUN;ARHGDIB;ARHGEF40;B2M;XDH;PFN2;CBR3
AS-605240 Up	7/146	0.0939213	0.264185	0	0	1.86138	4.40273	NQO1;TPM2;VPS37C;PBXIP1;EMB;SORBS1;EZR
Vemurafenib Down	7/146	0.0939213	0.264185	0	0	1.86138	4.40273	TGFBR3;GPC1;ABAT;IFIT1;ANTXR1;MYL9;EPHB3
Ro 28-1675 Down	7/146	0.0939213	0.264185	0	0	1.86138	4.40273	LGALS3;TPM2;GLRX;PCBD2;SYNPO;ATP1B1;NOL3
Ivabradine Down	7/146	0.0939213	0.264185	0	0	1.86138	4.40273	NRP1;GTF2A1;JUN;TPM1;FN1;ARHGEF40;S100A10
SB-224289 Down	7/146	0.0939213	0.264185	0	0	1.86138	4.40273	GAMT;HELLS;RRM2;SSNA1;POLR3H;DTL;LGMN
SB290157 Up	7/146	0.0939213	0.264185	0	0	1.86138	4.40273	LRP1;LMO4;TGFB1I1;ARHGDIB;DPH6;JAK2;FOXP1
CH-223191 Up	7/146	0.0939213	0.264185	0	0	1.86138	4.40273	FARP2;TOR3A;TPM2;FN1;NF1;TIMP2;SH3D19
Rimonabant Up	7/146	0.0939213	0.264185	0	0	1.86138	4.40273	NRP1;COL2A1;GLO1;IFRD1;PRRX2;VPS13A;SLC7A1
Spautin-1 Up	7/146	0.0939213	0.264185	0	0	1.86138	4.40273	TAGLN;TPM2;MED31;MICAL2;SIL1;SLC7A1;FAM107B
BMS 754807 Down	7/147	0.0965042	0.264185	0	0	1.84799	4.32092	HELLS;PDLIM2;RRM2;TPM2;ABAT;NOL3;DTL
Ac-YVAD-CHO Down	7/147	0.0965042	0.264185	0	0	1.84799	4.32092	CDA;NRP1;LRP1;COL14A1;POLR3H;PCBD2;ARHGEF40
SAR020106 Up	7/147	0.0965042	0.264185	0	0	1.84799	4.32092	GPRC5A;P2RX4;FTH1;SLC11A2;FAS;GLRX;ITM2B
Sunitinib Down	7/147	0.0965042	0.264185	0	0	1.84799	4.32092	HELLS;ORC6;RRM2;CDCA8;TTK;NES;DTL
AM966 Up	7/147	0.0965042	0.264185	0	0	1.84799	4.32092	NQO1;FTH1;DSTN;KIF21A;PBXIP1;PDLIM5;HAUS1
TPCA-1 Down	7/147	0.0965042	0.264185	0	0	1.84799	4.32092	HELLS;ORC6;RRM2;CDCA8;TTK;NES;DTL
BMY 7378 Down	7/147	0.0965042	0.264185	0	0	1.84799	4.32092	DAP;COL14A1;CTSL;MYADM;EPDR1;ATM;CRIP2
A 1120 Down	7/147	0.0965042	0.264185	0	0	1.84799	4.32092	TMEM59;COL14A1;FN1;EPDR1;ANTXR1;NUDT14;NDRG1
Dopamine Down	7/147	0.0965042	0.264185	0	0	1.84799	4.32092	NRP1;COL14A1;IFRD1;FN1;FAS;CRIP2;JAK2
4mu8C Up	7/147	0.0965042	0.264185	0	0	1.84799	4.32092	FARP2;PON3;DTX3L;IL6ST;ANTXR1;B2M;IGF1R
Atglistatin Down	7/147	0.0965042	0.264185	0	0	1.84799	4.32092	ABHD17B;TGFB1I1;FN1;EPDR1;CRLF1;PHLDA3;SH3D19
UNC1215 Up	7/147	0.0965042	0.264185	0	0	1.84799	4.32092	SCARB1;CSRP2;FTH1;TPM2;HSPB1;GLRX;NES
Fluorescein Down	7/147	0.0965042	0.264185	0	0	1.84799	4.32092	NRP1;TMEM59;DAP;FN1;PCBD2;ITM2B;IRF9
GNF-5 Up	7/147	0.0965042	0.264185	0	0	1.84799	4.32092	NRP1;JUN;PLAUR;MICAL2;AGA;NOL3;KCTD15
BS-181 Down	7/147	0.0965042	0.264185	0	0	1.84799	4.32092	CYB5A;SLC11A2;PRRX2;PGLS;SLC7A1;GLG1;LGMN
mL347 Down	7/147	0.0965042	0.264185	0	0	1.84799	4.32092	GPC1;TPM1;ARHGEF40;SYNPO;NUDT14;NES;S100A10
Pomalidomide Up	7/147	0.0965042	0.264185	0	0	1.84799	4.32092	TPST2;TPM2;TPM1;LMOD1;MED19;KCTD12;NES
Gliclazide Down	7/147	0.0965042	0.264185	0	0	1.84799	4.32092	FARP2;TMEM59;FTH1;CLTB;TIMP2;CRLF1;CBR3
STK416816 Down	7/147	0.0965042	0.264185	0	0	1.84799	4.32092	TGFB1I1;BSG;FN1;PLAUR;PGPEP1;APBA3;IRF9
HMS3745G19 Down	7/147	0.0965042	0.264185	0	0	1.84799	4.32092	RRM2;CD81;SESTD1;KCTD12;FSTL1;SLC7A1;RAD9A
NBTGR Down	7/147	0.0965042	0.264185	0	0	1.84799	4.32092	JUN;P2RX4;BAG3;CTSL;FTH1;FN1;DDA1
GR79236 Up	7/147	0.0965042	0.264185	0	0	1.84799	4.32092	HELLS;ORC6;RRM2;CDCA8;TTK;B2M;DTL
Aztreonam Up	7/147	0.0965042	0.264185	0	0	1.84799	4.32092	COL1A1;FARP1;COL2A1;TPM1;FN1;DPH6;SLC7A1
Prinomastat Down	7/147	0.0965042	0.264185	0	0	1.84799	4.32092	TGFB1I1;ARHGDIB;ADAM9;DPH6;SYNPO;DNPH1;ITM2C
CAY10650 Down	7/147	0.0965042	0.264185	0	0	1.84799	4.32092	CDA;GLO1;PRRX2;PLA2G4A;GLRX;SOD2;CBR3
CCT128930 Down	7/147	0.0965042	0.264185	0	0	1.84799	4.32092	RASSF1;JUN;CEBPB;ORC6;RRM2;CDCA8;TTK
UNC2250 Down	7/148	0.0991261	0.264185	0	0	1.83479	4.24087	HELLS;CEBPB;ORC6;RRM2;CDCA8;TTK;DTL
Necrostatin 2 Down	7/148	0.0991261	0.264185	0	0	1.83479	4.24087	CDA;LGALS3;JUN;IFRD1;GLRX;PLCD1;LGMN
LY 487379 Down	7/148	0.0991261	0.264185	0	0	1.83479	4.24087	CD81;RBP1;MED31;EPDR1;PCBD2;B2M;PTGS1
W-13 HCl Up	7/148	0.0991261	0.264185	0	0	1.83479	4.24087	TOR3A;DNPEP;ADI1;FN1;B2M;NDRG1;WASF2
IBC 293 Up	7/148	0.0991261	0.264185	0	0	1.83479	4.24087	COL1A1;NQO1;JUN;AHNAK2;FN1;TAP1;FAS
Ro 48-8071 Up	7/148	0.0991261	0.264185	0	0	1.83479	4.24087	SCARB1;NRP1;TMEM59;ACSL1;IDH1;ACSL4;SYNPO
Bosutinib Down	7/148	0.0991261	0.264185	0	0	1.83479	4.24087	NRP1;HELLS;RRM2;TTK;JAK2;DTL;HAUS1
Vilazodone Up	7/148	0.0991261	0.264185	0	0	1.83479	4.24087	SCARB1;TMEM59;P2RX4;GM2A;FTH1;ITM2B;ITM2C
Conivaptan Up	7/148	0.0991261	0.264185	0	0	1.83479	4.24087	NRP1;CYB5A;CEBPB;CTSL;CLTB;PLAUR;SIL1
ABT-199 Down	7/148	0.0991261	0.264185	0	0	1.83479	4.24087	TOR3A;CYB5A;ABHD17B;CAT;FN1;IL6ST;NOL3
Phenylboronic Acid Down	7/148	0.0991261	0.264185	0	0	1.83479	4.24087	NRP1;P2RX4;CD81;COL14A1;GUK1;IFRD1;SH3D19
HMS3745G19 Up	7/148	0.0991261	0.264185	0	0	1.83479	4.24087	SCARB1;NRP1;TMEM59;P2RX4;FTH1;ADAR;OSMR
Succinobucol Up	7/148	0.0991261	0.264185	0	0	1.83479	4.24087	CEBPB;ELOF1;FTH1;IFRD1;PBXIP1;SIL1;PFN2
Mifepristone Up	7/148	0.0991261	0.264185	0	0	1.83479	4.24087	NSMCE4A;ITGA3;NONO;IFRD1;EZR;B2M;PFN2
Teijin Compound 1 Up	7/148	0.0991261	0.264185	0	0	1.83479	4.24087	SCARB1;NRP1;TMEM59;RRAS;CD81;GEMIN2;FN1
Olopatadine Down	7/148	0.0991261	0.264185	0	0	1.83479	4.24087	CDA;FTH1;MED31;FN1;MED19;DNPH1;PLCD1
Bombesin Down	7/148	0.0991261	0.264185	0	0	1.83479	4.24087	NRP1;P2RX4;ABHD17B;FTH1;FN1;PHLDA3;ITM2C
Olaparib Up	7/148	0.0991261	0.264185	0	0	1.83479	4.24087	RASSF1;RRM2;CDCA8;FAS;PGPEP1;DNPH1;PHLDA3
Obatoclax Down	7/148	0.0991261	0.264185	0	0	1.83479	4.24087	HELLS;DPP7;ORC6;RRM2;CDCA8;TTK;DTL
NS309 Down	7/148	0.0991261	0.264185	0	0	1.83479	4.24087	TMEM59;TAGLN;DTX3L;COL14A1;IFRD1;FN1;FSTL1
Chloro-L-alanine Down	7/148	0.0991261	0.264185	0	0	1.83479	4.24087	CDA;COL14A1;GUK1;SLC11A2;MICAL2;B2M;DNPH1
Cyanuric Chloride Down	7/148	0.0991261	0.264185	0	0	1.83479	4.24087	CCNT1;CALD1;PLAUR;EPDR1;CPE;GLRX;LGMN
Filanesib Up	7/148	0.0991261	0.264185	0	0	1.83479	4.24087	COL1A2;COL14A1;FN1;TIMP2;CDCA8;THBS1;ITM2B
Epoxomicin Up	7/148	0.0991261	0.264185	0	0	1.83479	4.24087	RASSF1;JUN;ATG101;BAG3;IFRD1;MYL9;PHLDA3
SSR 69071 Up	7/149	0.101787	0.265193	0	0	1.82178	4.16253	NQO1;CTSL;IFRD1;PLAUR;KCTD12;PCBD2;PHLDA3
BACE1 Down	7/149	0.101787	0.265193	0	0	1.82178	4.16253	CD81;COL14A1;ARHGDIB;PRUNE2;PLAUR;PCBD2;NUDT14
GSK2578215 Down	7/149	0.101787	0.265193	0	0	1.82178	4.16253	VCAN;GM2A;TPM1;VPS13A;MYL9;CRLF1;PHLDA3
PP 1 Down	7/149	0.101787	0.265193	0	0	1.82178	4.16253	VCAN;CEBPB;ELOF1;IFRD1;SLC11A2;KCTD12;SLC7A1
AZ 628 Down	7/149	0.101787	0.265193	0	0	1.82178	4.16253	VCAN;FOXC1;ORC6;RRM2;CDCA8;TTK;DTL
GSK 650394 Up	7/149	0.101787	0.265193	0	0	1.82178	4.16253	FARP2;PON3;VCAN;DTX3L;FTH1;IFRD1;CDCA8
Quisinostat Down	7/149	0.101787	0.265193	0	0	1.82178	4.16253	MMP14;VCAN;FOXC1;FAT1;JAK2;OSMR;PHLDA3
PP2 Up	7/149	0.101787	0.265193	0	0	1.82178	4.16253	FOXC1;SERPINE2;VPS37C;PBXIP1;IFIT1;PARP9;PDLIM5
QNZ Up	7/149	0.101787	0.265193	0	0	1.82178	4.16253	NRP1;CEBPB;RRM2;IFRD1;PLAUR;MICAL2;SLC7A1
NB-598 Up	7/149	0.101787	0.265193	0	0	1.82178	4.16253	COL1A1;VCAN;MICAL2;NAF1;B2M;NUDT14;XDH
Aztreonam Down	7/149	0.101787	0.265193	0	0	1.82178	4.16253	TGFB1I1;TPM1;GLRX;PCBD2;IFIT1;ARHGEF40;PGPEP1
Salmeterol Up	7/149	0.101787	0.265193	0	0	1.82178	4.16253	SCARB1;FTH1;IDH1;PBXIP1;PGPEP1;PARP9;NDRG1
Mardepodect Up	7/149	0.101787	0.265193	0	0	1.82178	4.16253	NRP1;CEBPB;GPRC5A;COL5A1;PLAUR;OSMR;ITM2C
Nexturastat A Up	7/149	0.101787	0.265193	0	0	1.82178	4.16253	JUN;CSRP2;GFPT2;MAP1A;ABAT;SORBS1;PLCD1
AZD7762 Down	7/149	0.101787	0.265193	0	0	1.82178	4.16253	NRP1;HELLS;ORC6;RRM2;CDCA8;TTK;DTL
Veliparib Down	6/133	0.142304	0.370203	0	0	1.74397	3.40038	GLTP;NRP1;IFRD1;PGPEP1;FAM107B;ADAT2
Varespladib Down	6/139	0.164359	0.392423	0	0	1.66478	3.0061	DAP;H6PD;COL14A1;TPM1;FN1;VPS13A
Dapagliflozin Up	6/140	0.16817	0.392423	0	0	1.65227	2.94564	TPM2;TGFB1I1;TPM1;PARP9;NDRG1;NES
Varespladib Up	6/140	0.16817	0.392423	0	0	1.65227	2.94564	TUBB3;EZR;IL6ST;NOL3;PDLIM5;HAUS1
SMI-16a Up	6/140	0.16817	0.392423	0	0	1.65227	2.94564	LDHB;CYB5A;TUBB3;ADI1;LMOD1;PCBD2
Tasimelteon Down	6/141	0.172017	0.392423	0	0	1.63995	2.88657	TMEM59;RCN1;BAG3;PLAUR;PCBD2;USP18
Forodesine Down	6/141	0.172017	0.392423	0	0	1.63995	2.88657	JUN;SERPINE2;LYRM4;ABAT;B2M;CRIP1
Metolazone Down	6/141	0.172017	0.392423	0	0	1.63995	2.88657	DAP;LRP1;FN1;ARHGEF40;SYNPO;PGPEP1
Resmetirom Up	6/141	0.172017	0.392423	0	0	1.63995	2.88657	BAG3;TPM2;TPM1;LMOD1;GLRX;NOL3
FTI-277 Up	6/141	0.172017	0.392423	0	0	1.63995	2.88657	TGFBR3;EHD2;JUN;PDLIM2;PHLDA3;S100A10
Gefitinib Up	6/141	0.172017	0.392423	0	0	1.63995	2.88657	NRP1;JUN;GPRC5A;IFRD1;PLAUR;ITM2C
5-Hydroxyflavone Down	6/141	0.172017	0.392423	0	0	1.63995	2.88657	DAP;COL5A1;LRP1;IL6ST;JAK2;IGF1R
Purvalanol Down	6/141	0.172017	0.392423	0	0	1.63995	2.88657	IFIH1;FOXC1;GM2A;PLAUR;MED19;MYL9
Rofecoxib Up	6/141	0.172017	0.392423	0	0	1.63995	2.88657	FARP2;GTF2A1;TPM2;DPH6;NES;PHLDA3
RN-1734 Up	6/141	0.172017	0.392423	0	0	1.63995	2.88657	LDHB;COL2A1;NONO;BUD31;EPDR1;KCTD12
R-848 Down	6/142	0.175901	0.392423	0	0	1.62781	2.82885	H6PD;COL14A1;FKBP7;NOL3;IRF9;PLCD1
NSC 23766 Down	6/142	0.175901	0.392423	0	0	1.62781	2.82885	GAMT;COL1A1;FN1;GLRX;NOL3;NDRG1
BEC Down	6/142	0.175901	0.392423	0	0	1.62781	2.82885	RCN1;CALD1;FTH1;B2M;NDRG1;CBR3
MK-1775 Down	6/142	0.175901	0.392423	0	0	1.62781	2.82885	HELLS;ORC6;RRM2;SLC11A2;SNX8;KIF15
Paroxetine Down	6/142	0.175901	0.392423	0	0	1.62781	2.82885	LYRM4;FN1;JAK2;B2M;SLC7A1;LGMN
Berzosertib Down	6/142	0.175901	0.392423	0	0	1.62781	2.82885	GAMT;PRIM2;RRM2;ADI1;TPM2;PRUNE2
Methazolamide Down	6/142	0.175901	0.392423	0	0	1.62781	2.82885	GTF2A1;CALD1;FN1;EMB;JAK2;PGPEP1
Enzastaurin Up	6/142	0.175901	0.392423	0	0	1.62781	2.82885	FOXC1;DDX24;RBP1;LMOD1;ACSL4;IL6ST
Zaltoprofen Down	6/142	0.175901	0.392423	0	0	1.62781	2.82885	CYB5A;DAP;RCN1;BAG3;FTH1;FN1
NSC43673 Up	6/143	0.179821	0.392423	0	0	1.61584	2.77245	GTF2A1;MMP14;ADI1;TPM2;TPM1;ADAT2
CB-839 Up	6/143	0.179821	0.392423	0	0	1.61584	2.77245	CEBPB;COL14A1;FTH1;FN1;LMOD1;THBS1
FMK Up	6/143	0.179821	0.392423	0	0	1.61584	2.77245	NQO1;ELOF1;CTSL;EPDR1;MYL9;RAD9A
VPC23019 Up	6/143	0.179821	0.392423	0	0	1.61584	2.77245	RCN1;BAG3;TPM2;MYADM;PARP9;NDRG1
NSC19883 Down	6/143	0.179821	0.392423	0	0	1.61584	2.77245	RCN1;CEBPB;BAG3;SSNA1;FAS;F11R
A-317491 Down	6/143	0.179821	0.392423	0	0	1.61584	2.77245	RRM2;CHSY1;BAG3;TPM2;TTK;S100A10
BMS-5 Up	6/143	0.179821	0.392423	0	0	1.61584	2.77245	TGFBR3;FOXC1;PRRX2;LMOD1;EMB;PGPEP1
KPT-330 Down	6/143	0.179821	0.392423	0	0	1.61584	2.77245	NRP1;RRM2;ATAD5;LMO4;CDCA8;TTK
Rifaximin Down	6/143	0.179821	0.392423	0	0	1.61584	2.77245	TMEM59;DAP;RCN1;FN1;LMOD1;NOL3
AGI-6780 Up	6/143	0.179821	0.392423	0	0	1.61584	2.77245	NRP1;CYB5A;CEBPB;LRP1;TPM1;MICAL2
Levosimendan Up	6/143	0.179821	0.392423	0	0	1.61584	2.77245	NRP1;FN1;PLAUR;LMO7;GLRX;ADAT2
CHEMBL1643306 Up	6/143	0.179821	0.392423	0	0	1.61584	2.77245	RPS19BP1;LMO4;GUK1;FN1;EPHB3;PFN2
Ginkgolide A Up	6/143	0.179821	0.392423	0	0	1.61584	2.77245	DNPEP;LMOD1;ANTXR1;NUDT14;WASF2;TTC39B
Papaverine Up	6/143	0.179821	0.392423	0	0	1.61584	2.77245	CHID1;LGALS3;NRP1;GPRC5A;PGPEP1;ARPIN
Doramapimod Down	6/143	0.179821	0.392423	0	0	1.61584	2.77245	COL1A1;COL2A1;COL14A1;NF1;PLEKHO2;EPHB3
UMI-77 Up	6/143	0.179821	0.392423	0	0	1.61584	2.77245	NRP1;JUN;IFRD1;PLAUR;MICAL2;PGPEP1
Prinomastat Up	6/143	0.179821	0.392423	0	0	1.61584	2.77245	MPP2;GPC1;TIMP2;PTPRK;NUDT14;RAD9A
SB 525334 Down	6/143	0.179821	0.392423	0	0	1.61584	2.77245	GEMIN2;TGFB1I1;FAT1;SYNPO;NES;CRIP1
Icotinib Down	6/143	0.179821	0.392423	0	0	1.61584	2.77245	CYB5A;MED31;FN1;DCTPP1;ITM2C;RAD9A
Darapladib Down	6/143	0.179821	0.392423	0	0	1.61584	2.77245	GLTP;FARP1;COL2A1;LMO4;TPM1;ECE1
DY 131 Up	6/144	0.183775	0.392423	0	0	1.60405	2.71733	JUN;DAP;FN1;FAS;THBS1;PFN2
Basimglurant Down	6/144	0.183775	0.392423	0	0	1.60405	2.71733	NQO1;IRGQ;FTH1;EPDR1;GLRX;NOL3
Ralfinamide Up	6/144	0.183775	0.392423	0	0	1.60405	2.71733	LGALS3;CERS5;GM2A;TPM2;TPM1;GLRX
Tofacitinib Down	6/144	0.183775	0.392423	0	0	1.60405	2.71733	JUN;CEBPB;TPM1;FN1;TIMP2;NES
VUF11207 Up	6/144	0.183775	0.392423	0	0	1.60405	2.71733	LGALS3;NQO1;FTH1;ACP6;NDRG1;PLCD1
(S)-Selisistat Up	6/144	0.183775	0.392423	0	0	1.60405	2.71733	TGFBR3;LRP1;SSNA1;PRRX2;PTPN21;EPHB3
MG-132 Down	6/144	0.183775	0.392423	0	0	1.60405	2.71733	ALCAM;GPC1;FAM3C;B2M;CRIP1;GLG1
Enzalutamide Down	6/144	0.183775	0.392423	0	0	1.60405	2.71733	RCN1;BAG3;COL14A1;TPM2;PDLIM5;NDRG1
H 89 Down	6/144	0.183775	0.392423	0	0	1.60405	2.71733	CSRP2;RRM2;TPM2;ARHGDIB;PAWR;SLC7A1
Dorzolamide Up	6/144	0.183775	0.392423	0	0	1.60405	2.71733	GTF2A1;ELOF1;TPM2;NF1;TMED3;B2M
CHEMBL1348080 Up	6/144	0.183775	0.392423	0	0	1.60405	2.71733	JUN;DAP;CALD1;COL14A1;TGFB1I1;B2M
ZINC8945 Down	6/144	0.183775	0.392423	0	0	1.60405	2.71733	CEBPB;GM2A;GUK1;APBA3;B2M;EPHB3
Vernakalant Up	6/144	0.183775	0.392423	0	0	1.60405	2.71733	COL5A1;LMO4;BAG3;CMC2;CLTB;DDA1
Dapiprazole Down	6/144	0.183775	0.392423	0	0	1.60405	2.71733	TMEM59;GEMIN2;EZR;PGPEP1;AGPAT1;PFN2
Olodaterol Down	6/144	0.183775	0.392423	0	0	1.60405	2.71733	CD81;SSNA1;PLAUR;MED19;B2M;NUDT14
Tazarotene1 Down	6/144	0.183775	0.392423	0	0	1.60405	2.71733	FTH1;PLAUR;APBA3;NDRG1;ITM2B;IRF2BPL
Carbamazepine Down	6/144	0.183775	0.392423	0	0	1.60405	2.71733	NPEPL1;LRP1;CMC2;ARHGDIB;IL6ST;IGF1R
GSK189254A Down	6/144	0.183775	0.392423	0	0	1.60405	2.71733	COL1A1;TOR3A;COL2A1;PLAUR;SYNPO;B2M
Abiraterone2 Down	6/144	0.183775	0.392423	0	0	1.60405	2.71733	EHD2;DAP;TPM1;MED31;FN1;B2M
Fluconazole Down	6/144	0.183775	0.392423	0	0	1.60405	2.71733	TMEM59;GPRC5A;LRP1;MED31;FN1;VPS13A
TAK-779 Up	6/144	0.183775	0.392423	0	0	1.60405	2.71733	TMEM59;COL14A1;FTH1;IFRD1;ITM2B;ITM2C
CBL0137 Down	6/144	0.183775	0.392423	0	0	1.60405	2.71733	CEBPB;ELF2;RPS19BP1;DDX56;RRP12;WDR46
Defactinib Up	6/144	0.183775	0.392423	0	0	1.60405	2.71733	GPRC5A;PLAUR;B2M;SLC7A1;IGF1R;HAUS1
Ezatiostat Up	6/145	0.187763	0.392423	0	0	1.59243	2.66345	NF1;MED19;ARHGEF40;B2M;IGF1R;ADAT2
CGP77675 Down	6/145	0.187763	0.392423	0	0	1.59243	2.66345	HELLS;RRM2;ATAD5;CDCA8;TTK;PPP1R12B
3,5-Dichlorosalicylic Acid Down	6/145	0.187763	0.392423	0	0	1.59243	2.66345	OAT;LYRM4;MGST1;FN1;RSL24D1;ADAT2
MLS0315771 Down	6/145	0.187763	0.392423	0	0	1.59243	2.66345	ELOF1;PARP9;B2M;SIL1;EPHB3;LGMN
Tafamidis Up	6/145	0.187763	0.392423	0	0	1.59243	2.66345	GLTP;TOR3A;JUN;DNPEP;GM2A;GLRX
Aliskiren Down	6/145	0.187763	0.392423	0	0	1.59243	2.66345	COL14A1;ARHGEF40;DNPH1;PLCD1;EPHB3;CBR3
4-Aminobenzohydrazide Up	6/145	0.187763	0.392423	0	0	1.59243	2.66345	ELF2;PDCD11;DSTN;PGLS;PWP2;PFN2
CHEMBL2172374 Up	6/145	0.187763	0.392423	0	0	1.59243	2.66345	FOXC1;GUK1;MED19;AGPAT1;FSTL1;USP18
Acifran Down	6/145	0.187763	0.392423	0	0	1.59243	2.66345	CDA;DAP;FN1;ANXA6;PLA2G4A;PTGS1
AC-7954 Up	6/145	0.187763	0.392423	0	0	1.59243	2.66345	FARP1;EPDR1;CRIP2;KCTD12;JAK2;ADAT2
TCS PIM-1 1 Down	6/145	0.187763	0.392423	0	0	1.59243	2.66345	GPRC5A;MYADM;PLAUR;PTPRK;B2M;ITM2B
AM 630 Up	6/145	0.187763	0.392423	0	0	1.59243	2.66345	CYB5A;NQO1;MMP14;CPE;ABAT;CRIP1
BRL 54443 Down	6/145	0.187763	0.392423	0	0	1.59243	2.66345	TMEM59;MMP14;FOXC1;ABHD17B;BAG3;EPDR1
XAV 939 Up	6/145	0.187763	0.392423	0	0	1.59243	2.66345	NRP1;DTX3L;TPM2;PLAUR;JAK2;IRF2BPL
Probenecid Up	6/145	0.187763	0.392423	0	0	1.59243	2.66345	TPST2;DTX3L;LMO4;TPM2;AMPD3;JAK2
TOFA Down	6/145	0.187763	0.392423	0	0	1.59243	2.66345	TOR3A;ABHD17B;CD81;PKP2;FN1;GLG1
P005091 Up	6/145	0.187763	0.392423	0	0	1.59243	2.66345	JUN;BAG3;IFRD1;FN1;TIMP2;MYL9
Tranexamic Acid Down	6/145	0.187763	0.392423	0	0	1.59243	2.66345	DAP;COL14A1;CTSL;CRIP2;GLRX;ARPIN
mL347 Up	6/145	0.187763	0.392423	0	0	1.59243	2.66345	COL18A1;FOXC1;COL1A2;FN1;KCTD12;AGA
RVX-208 Up	6/145	0.187763	0.392423	0	0	1.59243	2.66345	HELZ2;ALAD;APLP2;DCXR;AHNAK2;GLG1
Tandutinib Down	6/145	0.187763	0.392423	0	0	1.59243	2.66345	RASSF1;DAP;IFRD1;NF1;B2M;NUDT14
STK746869 Down	6/145	0.187763	0.392423	0	0	1.59243	2.66345	BSG;CLTB;TIMP2;PLCD1;FAM107B;TAPBP
Tanomastat Up	6/145	0.187763	0.392423	0	0	1.59243	2.66345	NRP1;ANXA1;TUBB3;SSNA1;FAM3C;PHLDA3
CHEMBL569227 Down	6/145	0.187763	0.392423	0	0	1.59243	2.66345	NRP1;JUN;APLP2;TPM1;PLAUR;EPDR1
AMG 487 Down	6/145	0.187763	0.392423	0	0	1.59243	2.66345	ELOF1;FTH1;NF1;AMPD3;B2M;FSTL1
AQ-390/43364023 Up	6/145	0.187763	0.392423	0	0	1.59243	2.66345	LMO4;MACROD1;FN1;EPDR1;ARPIN;CBR3
Silodosin Up	6/145	0.187763	0.392423	0	0	1.59243	2.66345	LGALS3;CYB5A;ARHGDIB;FN1;EPDR1;FOXP1
Methylnaltrexone Up	6/145	0.187763	0.392423	0	0	1.59243	2.66345	COL1A1;GTF2A1;CYB5A;GNG12;B2M;SH3D19
Benzo(a)pyrene Down	6/145	0.187763	0.392423	0	0	1.59243	2.66345	GLTP;CYB5A;LYRM4;LMOD1;PTPN21;DCTPP1
Migalastat Down	6/145	0.187763	0.392423	0	0	1.59243	2.66345	COL1A2;LRP1;EPDR1;ARHGEF40;IGF1R;EPHB3
(S)-Zopiclone Down	6/145	0.187763	0.392423	0	0	1.59243	2.66345	NRP1;JUN;IL6ST;MYL9;DNPH1;PFN2
fMLF Down	6/145	0.187763	0.392423	0	0	1.59243	2.66345	COL14A1;TPM1;GLRX;SYNPO;CRIP1;LGMN
AZD1152 Up	6/145	0.187763	0.392423	0	0	1.59243	2.66345	IKBIP;NQO1;FAT1;FAS;PGPEP1;PHLDA3
UNC2881 Up	6/145	0.187763	0.392423	0	0	1.59243	2.66345	IKBIP;ISYNA1;DPP7;CCNT1;CMC2;TMED3
c-Fms-IN-3 Down	6/145	0.187763	0.392423	0	0	1.59243	2.66345	GLTP;COL1A1;NQO2;FAT1;ARHGEF40;PHLDA3
PDE-9i Up	6/145	0.187763	0.392423	0	0	1.59243	2.66345	HELLS;ORC6;RRM2;CDCA8;TTK;DTL
9-Aminocamptothecin Down	6/145	0.187763	0.392423	0	0	1.59243	2.66345	PDCD11;APPBP2;DDX56;FAT1;IL6ST;OSMR
Asimadoline Down	6/145	0.187763	0.392423	0	0	1.59243	2.66345	NRP1;PON3;ARHGDIB;IFRD1;GLRX;B2M
Stiripentol Up	6/145	0.187763	0.392423	0	0	1.59243	2.66345	NRP1;GTF2A1;COL2A1;NPEPL1;GUK1;MED31
TNP-470 Down	6/145	0.187763	0.392423	0	0	1.59243	2.66345	COL18A1;RASSF1;JUN;RRM2;DPH6;DNPH1
WZ811 Down	6/145	0.187763	0.392423	0	0	1.59243	2.66345	GPRC5A;BAG3;CMC2;EPDR1;B2M;NES
GSK429286A Up	6/145	0.187763	0.392423	0	0	1.59243	2.66345	GUK1;PRUNE2;ANXA6;GLRX;PGLS;FAM107B
STF-31 Down	6/145	0.187763	0.392423	0	0	1.59243	2.66345	APPBP2;LMO4;PRRX2;CPE;OSMR;ITM2C
Navarixin Up	6/145	0.187763	0.392423	0	0	1.59243	2.66345	TPM2;GLO1;NAF1;KCTD12;B2M;TRMT61A
Eniporide Down	6/145	0.187763	0.392423	0	0	1.59243	2.66345	LRP1;FN1;EPDR1;KCTD12;ANTXR1;B2M
Tiagabine Down	6/145	0.187763	0.392423	0	0	1.59243	2.66345	TOR3A;BAG3;CALD1;COL14A1;IFRD1;PLAUR
NNC 26-9100 Up	6/145	0.187763	0.392423	0	0	1.59243	2.66345	NQO2;BAG3;ADI1;COL14A1;HSPB1;PGLS
Nitisinone Down	6/146	0.191785	0.392423	0	0	1.58097	2.61078	SLC11A2;PLAUR;KCTD12;IL6ST;NOL3;IGF1R
PF 4800567 Down	6/146	0.191785	0.392423	0	0	1.58097	2.61078	PDLIM1;P2RX4;PCBD2;NUDT14;THBS1;PLCD1
Tofacitinib Up	6/146	0.191785	0.392423	0	0	1.58097	2.61078	GTF2A1;LMOD1;GNG12;PDLIM5;XDH;RAD9A
4-Aminobenzohydrazide Down	6/146	0.191785	0.392423	0	0	1.58097	2.61078	GTF2A1;PON3;BAG3;TPM1;ARHGEF40;NES
RO495 Up	6/146	0.191785	0.392423	0	0	1.58097	2.61078	HEBP1;TAGLN;ORC6;CCNT1;COL14A1;DNTTIP2
SB 334867 Down	6/146	0.191785	0.392423	0	0	1.58097	2.61078	CDA;TPM1;KCTD12;IL6ST;B2M;WASF2
SC 560 Down	6/146	0.191785	0.392423	0	0	1.58097	2.61078	NRP1;FARP1;CEBPB;NPEPL1;COL14A1;FAM107B
Raloxifene Up	6/146	0.191785	0.392423	0	0	1.58097	2.61078	SCARB1;NRP1;IFIT1;OSMR;ITM2B;ITM2C
KU 55933 Up	6/146	0.191785	0.392423	0	0	1.58097	2.61078	TPST2;NQO1;TMEM59;LMO4;ACSL4;ITM2C
TMN 355 Down	6/146	0.191785	0.392423	0	0	1.58097	2.61078	TPST2;FTH1;NOL3;NDRG1;EPHB3;SH3D19
Repaglinide Down	6/146	0.191785	0.392423	0	0	1.58097	2.61078	TMEM59;DAP;FTH1;FN1;ARHGEF40;IRF9
BBL023172 Down	6/146	0.191785	0.392423	0	0	1.58097	2.61078	IFIH1;CALD1;FN1;NF1;PLAUR;NDRG1
Mubritinib Up	6/146	0.191785	0.392423	0	0	1.58097	2.61078	IFIH1;NRP1;CEBPB;AHNAK2;PLAUR;SLC7A1
L-Menthol Up	6/146	0.191785	0.392423	0	0	1.58097	2.61078	CYB5A;FTH1;SSNA1;TPM1;FN1;DCTPP1
RVX-208 Down	6/146	0.191785	0.392423	0	0	1.58097	2.61078	IFIH1;MLKL;IFRD1;EMB;PARP9;DUSP9
Cediranib Down	6/146	0.191785	0.392423	0	0	1.58097	2.61078	FARP2;HELLS;ORC6;RRM2;CDCA8;SLC7A1
6603-0104 Up	6/146	0.191785	0.392423	0	0	1.58097	2.61078	GTF2A1;NQO1;ISYNA1;KCTD12;IL6ST;B2M
CHEMBL1348080 Down	6/146	0.191785	0.392423	0	0	1.58097	2.61078	COL1A1;ELOF1;CPE;ABAT;ARHGEF40;FSTL1
CHEMBL1436068 Up	6/146	0.191785	0.392423	0	0	1.58097	2.61078	COL1A1;CALD1;GUK1;SLC11A2;ARHGEF40;HAUS1
Dihydroartemisinin Up	6/146	0.191785	0.392423	0	0	1.58097	2.61078	NRP1;JUN;CEBPB;IFRD1;FN1;PLAUR
TPPB Down	6/146	0.191785	0.392423	0	0	1.58097	2.61078	TGFBR3;SLC12A2;HELLS;RRM2;FAM3C;ANTXR1
N6022 Down	6/146	0.191785	0.392423	0	0	1.58097	2.61078	RASSF1;NQO2;FN1;GLRX;DCTPP1;PFN2
fMLF Up	6/146	0.191785	0.392423	0	0	1.58097	2.61078	TPM2;SLC11A2;FN1;DNPH1;PFN2;ADAT2
XEN445 Up	6/146	0.191785	0.392423	0	0	1.58097	2.61078	RPS19BP1;COL14A1;ARHGDIB;NF1;B2M;IGF1R
VU 0364439 Down	6/146	0.191785	0.392423	0	0	1.58097	2.61078	LGALS3;CYB5A;DAP;BAG3;PGLS;PCBD2
Ro 28-1675 Up	6/146	0.191785	0.392423	0	0	1.58097	2.61078	ATAD5;IFRD1;GPX8;EMB;IFIT1;PHLDA3
CA-074 Up	6/146	0.191785	0.392423	0	0	1.58097	2.61078	CDA;MMP14;SSNA1;EPDR1;TBC1D2B;IGF1R
Iclaprim Down	6/146	0.191785	0.392423	0	0	1.58097	2.61078	SNX18;ANXA6;VPS13A;MICAL2;DNPH1;CBR3
Sulcotrione Down	6/146	0.191785	0.392423	0	0	1.58097	2.61078	CERS5;TPM2;TPM1;SLC7A1;ITM2C;TAPBP
GSK2636771 Down	6/146	0.191785	0.392423	0	0	1.58097	2.61078	NRP1;COL14A1;NF1;IFIT1;DNPH1;FSTL1
GSK126 Up	6/146	0.191785	0.392423	0	0	1.58097	2.61078	FARP2;TMEM59;ACSL1;IDH1;GLRX;ITM2C
BHT Down	6/146	0.191785	0.392423	0	0	1.58097	2.61078	LMO4;BAG3;FKBP7;MED19;KCTD12;B2M
Celastrol Down	6/146	0.191785	0.392423	0	0	1.58097	2.61078	HELLS;GTF2A1;ORC6;RRM2;TIMELESS;NCAPD3
PF-04418948 Down	6/147	0.19584	0.392423	0	0	1.56968	2.55929	NRP1;ANXA6;GLRX;PCBD2;IL6ST;ADAT2
Alvimopan Down	6/147	0.19584	0.392423	0	0	1.56968	2.55929	TMEM59;LRP1;CTSL;FTH1;PCBD2;ITM2B
BMS 303141 Down	6/147	0.19584	0.392423	0	0	1.56968	2.55929	ELOF1;PLAUR;VPS37C;SYNPO;NOL3;CRLF1
HFI-142 Up	6/147	0.19584	0.392423	0	0	1.56968	2.55929	CALD1;TPM2;TPM1;FKBP7;PCBD2;IGF1R
AK-54059 Up	6/147	0.19584	0.392423	0	0	1.56968	2.55929	TPM2;GLO1;HSPB1;PGLS;DCTPP1;EGFR
Terazosin Down	6/147	0.19584	0.392423	0	0	1.56968	2.55929	COL1A1;TMEM59;APPBP2;LMO4;TIMP2;XDH
SC 560 Up	6/147	0.19584	0.392423	0	0	1.56968	2.55929	EHD2;TPM2;TIMP2;GLRX;FSTL1;EPHB3
Ziprasidone Down	6/147	0.19584	0.392423	0	0	1.56968	2.55929	FARP2;PRRC1;RAB4B;ATG101;GPC1;EOGT
(Z)-Pugnac Down	6/147	0.19584	0.392423	0	0	1.56968	2.55929	IRGQ;CERS5;COL14A1;FN1;EPDR1;PCBD2
HC 030031 Down	6/147	0.19584	0.392423	0	0	1.56968	2.55929	DAP;FTH1;ARHGDIB;GLRX;PCBD2;PLCD1
Eptifibatide Up	6/147	0.19584	0.392423	0	0	1.56968	2.55929	TGFBR3;DTX3L;CLTB;JAK2;B2M;USP18
Triclabendazole Up	6/147	0.19584	0.392423	0	0	1.56968	2.55929	ALCAM;COL1A2;TPM2;TPM1;B2M;NUDT14
Ivacaftor Down	6/147	0.19584	0.392423	0	0	1.56968	2.55929	GAMT;TPST2;GM2A;LMOD1;POLR3H;B2M
STL336112 Down	6/147	0.19584	0.392423	0	0	1.56968	2.55929	HELLS;RRM2;SSNA1;TTK;KCTD12;USP18
Darifenacin Down	6/147	0.19584	0.392423	0	0	1.56968	2.55929	NRP1;CEBPB;NF1;PLAUR;FSTL1;SLC7A1
STK841699 Up	6/147	0.19584	0.392423	0	0	1.56968	2.55929	NRP1;ELOF1;GM2A;CMC2;FN1;DNPH1
Dihydroartemisinin Down	6/147	0.19584	0.392423	0	0	1.56968	2.55929	HELLS;RRM2;SESTD1;TTK;NES;DTL
4-Methoxybenzoic Acid Down	6/147	0.19584	0.392423	0	0	1.56968	2.55929	NRP1;TMEM59;FTH1;TPM1;EZR;PFN2
Maraviroc Up	6/147	0.19584	0.392423	0	0	1.56968	2.55929	TUBB3;TPM2;NONO;EZR;PDLIM5;CRIP1
Zofenopril Down	6/147	0.19584	0.392423	0	0	1.56968	2.55929	TGFBR3;MMP14;CALD1;TPM1;DNPH1;PHLDA3
BI 2536 Down	6/147	0.19584	0.392423	0	0	1.56968	2.55929	NRP1;HELLS;MMP14;IFIT1;DUSP9;KCTD15
NVP-BHG712 Down	6/147	0.19584	0.392423	0	0	1.56968	2.55929	VCAN;ORC6;RRM2;CDCA8;TTK;DTL
Odanacatib Down	6/147	0.19584	0.392423	0	0	1.56968	2.55929	GTF2A1;NPEPL1;LMO4;FN1;JAK2;NOL3
Formestane Up	6/147	0.19584	0.392423	0	0	1.56968	2.55929	NRP1;HELLS;RRM2;CDCA8;TTK;DTL
OSI-027 Down	6/147	0.19584	0.392423	0	0	1.56968	2.55929	CEBPB;TPM2;IFRD1;ECE1;TTK;NES
Indapamide Down	6/147	0.19584	0.392423	0	0	1.56968	2.55929	COL2A1;ACP6;FN1;TIMP2;PCBD2;ARHGEF40
Prucalopride Up	6/147	0.19584	0.392423	0	0	1.56968	2.55929	SSNA1;PLAUR;B2M;DCTPP1;PHLDA3;HAUS1
Tezacaftor Down	6/147	0.19584	0.392423	0	0	1.56968	2.55929	GTF2A1;ANXA1;ARHGEF40;AGPAT1;NOL3;CBR3
ML218 Up	6/147	0.19584	0.392423	0	0	1.56968	2.55929	FARP2;CTSL;CMC2;GLRX;PPP1R12B;IGF1R
GSK-LSD1 Up	6/147	0.19584	0.392423	0	0	1.56968	2.55929	IKBIP;DTX3L;SLC11A2;PKP2;PLCD1;FOXP1
GW7647 Up	6/147	0.19584	0.392423	0	0	1.56968	2.55929	TGFBR3;CPT1A;ECH1;CAT;NUDT14;ADAT2
Bafetinib Down	6/147	0.19584	0.392423	0	0	1.56968	2.55929	VCAN;RRM2;ATAD5;CDCA8;TTK;DTL
CZC-25146 Up	6/147	0.19584	0.392423	0	0	1.56968	2.55929	CDCA8;NAF1;PDLIM5;XDH;TRMT61A;TGM2
CZC-25146 Down	6/147	0.19584	0.392423	0	0	1.56968	2.55929	JUN;PDLIM2;MCAM;MGST1;EPDR1;IFIT1
L-165041 Up	6/147	0.19584	0.392423	0	0	1.56968	2.55929	CPT1A;ECH1;IFRD1;CAT;RSL24D1;IGF1R
Tiagabine Up	6/147	0.19584	0.392423	0	0	1.56968	2.55929	GAMT;P2RX4;ATG101;GLO1;KCTD12;HAUS1
TCS 1102 Down	6/147	0.19584	0.392423	0	0	1.56968	2.55929	TMEM59;DAP;ATG101;FHL1;LMOD1;ITM2C
Spautin-1 Down	6/147	0.19584	0.392423	0	0	1.56968	2.55929	RASSF1;JUN;RRM2;GM2A;HSPB1;IRF9
Darapladib Up	6/147	0.19584	0.392423	0	0	1.56968	2.55929	CD81;FN1;PLAUR;ITM2B;ITM2C;HAUS1
LPA2 An1 Down	6/148	0.199926	0.392423	0	0	1.55854	2.50895	ORC6;RRM2;CDCA8;TTK;NOL3;DTL
BMS309403 Down	6/148	0.199926	0.392423	0	0	1.55854	2.50895	GPRC5A;P2RX4;MED31;PLAUR;PHLDA3;SH3D19
ICG-001 Down	6/148	0.199926	0.392423	0	0	1.55854	2.50895	ORC6;RRM2;CDCA8;TTK;POLR3H;DTL
Genistein Up	6/148	0.199926	0.392423	0	0	1.55854	2.50895	IKBIP;ISYNA1;SSNA1;TPM1;FAS;ABAT
Desipramine Up	6/148	0.199926	0.392423	0	0	1.55854	2.50895	COL1A1;COL18A1;SSNA1;COL12A1;CPE;USP18
Zonisamide Down	6/148	0.199926	0.392423	0	0	1.55854	2.50895	IRGQ;GM2A;FTH1;PLAUR;MED19;ATM
SR 11237 Down	6/148	0.199926	0.392423	0	0	1.55854	2.50895	CDA;NRP1;ALDH2;FTH1;ABAT;PLCD1
CPI-203 Down	6/148	0.199926	0.392423	0	0	1.55854	2.50895	IFIH1;NRP1;MMP14;IFRD1;DUSP9;KCTD15
TCS ERK 11E Down	6/148	0.199926	0.392423	0	0	1.55854	2.50895	HELLS;ORC6;RRM2;TGFB1I1;TTK;DTL
Histamine Down	6/148	0.199926	0.392423	0	0	1.55854	2.50895	TMEM59;COL14A1;FTH1;SLC11A2;EPDR1;JAK2
VU 0364739 Down	6/148	0.199926	0.392423	0	0	1.55854	2.50895	HELLS;RRM2;ATAD5;SSNA1;CDCA8;DTL
BMS-5 Down	6/148	0.199926	0.392423	0	0	1.55854	2.50895	JUN;DNPEP;LRP1;TPM1;TIMP2;CPE
Forodesine Up	6/148	0.199926	0.392423	0	0	1.55854	2.50895	MMP14;FOXC1;RBP1;PLAUR;MICAL2;MYL9
Enzalutamide Up	6/148	0.199926	0.392423	0	0	1.55854	2.50895	TPST2;CALD1;PRRX2;ADAR;NOL3;DCK
GW 501516 Up	6/148	0.199926	0.392423	0	0	1.55854	2.50895	CPT1A;ATAD5;LYRM4;ECH1;CAT;PLAUR
STK772817 Down	6/148	0.199926	0.392423	0	0	1.55854	2.50895	DAP;CALD1;TGFB1I1;B2M;NUDT14;ADAT2
SB-269970 Down	6/148	0.199926	0.392423	0	0	1.55854	2.50895	MMP14;GPRC5A;MYADM;LMOD1;PLCD1;RAD9A
Aprepitant Up	6/148	0.199926	0.392423	0	0	1.55854	2.50895	COL1A1;LGALS3;BAG3;COL14A1;PLAUR;IRF9
Darifenacin Up	6/148	0.199926	0.392423	0	0	1.55854	2.50895	TGFBR3;GFPT2;TPM1;COTL1;CRIP2;TAPBP
Laropiprant Down	6/148	0.199926	0.392423	0	0	1.55854	2.50895	GTF2A1;MMP14;CTSL;LMOD1;NOL3;ANTXR1
Treprostinil Down	6/148	0.199926	0.392423	0	0	1.55854	2.50895	FOXC1;NQO2;TIMP2;PCBD2;IL6ST;PFN2
L-779450 Down	6/148	0.199926	0.392423	0	0	1.55854	2.50895	CEBPB;ORC6;RRM2;CDCA8;TTK;DTL
MEK162 Down	6/148	0.199926	0.392423	0	0	1.55854	2.50895	VCAN;ORC6;RRM2;CDCA8;TTK;DTL
AS-605240 Down	6/148	0.199926	0.392423	0	0	1.55854	2.50895	TGFBR3;KANK1;JUN;CD81;IFRD1;FN1
Y-33075 Down	6/148	0.199926	0.392423	0	0	1.55854	2.50895	NRP1;CEBPB;CSRP2;GPRC5A;RRM2;NDRG1
Sapropterin Up	6/148	0.199926	0.392423	0	0	1.55854	2.50895	CDA;ISYNA1;TBC1D2B;GLRX;NOL3;DNPH1
2,2-Biquinoline Down	6/148	0.199926	0.392423	0	0	1.55854	2.50895	SESTD1;GEMIN2;SLC11A2;TIMP2;PHLDA3;TTC39B
Pamidronic Acid Down	6/148	0.199926	0.392423	0	0	1.55854	2.50895	COL14A1;CMC2;DNPH1;IGF1R;RAD9A;SH3D19
Pyrene Down	6/148	0.199926	0.392423	0	0	1.55854	2.50895	FARP2;FARP1;ELOF1;TGFB1I1;MED31;CRIP1
Siponimod Up	6/148	0.199926	0.392423	0	0	1.55854	2.50895	FARP2;PLAUR;NAF1;IFIT1;XDH;TRMT61A
Siponimod Down	6/148	0.199926	0.392423	0	0	1.55854	2.50895	DAP;CLTB;RSL24D1;DCTPP1;IGF1R;CBR3
Birabresib Down	6/148	0.199926	0.392423	0	0	1.55854	2.50895	NRP1;MMP14;IFRD1;SLC11A2;NES;KCTD15
Idasanutlin Down	6/148	0.199926	0.392423	0	0	1.55854	2.50895	HELLS;ORC6;RRM2;CDCA8;TTK;DTL
Tirofiban Up	6/149	0.204044	0.394726	0	0	1.54756	2.45973	KANK1;FOXC1;CLTB;DSTN;APBA3;ADAT2
Tirofiban Down	6/149	0.204044	0.394726	0	0	1.54756	2.45973	NPEPL1;TPM2;MICAL2;ABAT;PPP1R12B;B2M
Telotristat Down	6/149	0.204044	0.394726	0	0	1.54756	2.45973	CDA;TOR3A;ELOF1;CHSY1;CD81;DCTPP1
PD 176252 Down	6/149	0.204044	0.394726	0	0	1.54756	2.45973	RRM2;TPM2;CDCA8;TTK;NES;DTL
MK 886 Up	6/149	0.204044	0.394726	0	0	1.54756	2.45973	NRP1;TGFB1I1;IFRD1;IFIT1;PGPEP1;SLC7A1
BAY 57-1293 Down	6/149	0.204044	0.394726	0	0	1.54756	2.45973	COL1A1;CYB5A;COL14A1;TPM2;KCTD12;IL6ST
STL304557 Down	6/149	0.204044	0.394726	0	0	1.54756	2.45973	NRP1;VCAN;GEMIN2;TGFB1I1;TIMP2;RAD9A
CHEMBL2397099 Down	6/149	0.204044	0.394726	0	0	1.54756	2.45973	RASSF1;DNPEP;COL14A1;EPDR1;CPE;APBA3
L-Valyl-L-phenylalanine Down	6/149	0.204044	0.394726	0	0	1.54756	2.45973	MMP14;RCN1;TGFB1I1;SLC7A1;SORBS3;KCTD15
Azilsartan Down	6/149	0.204044	0.394726	0	0	1.54756	2.45973	MMP14;TAGLN;FN1;FAT1;PCBD2;PHLDA3
Reversine Down	6/149	0.204044	0.394726	0	0	1.54756	2.45973	HELLS;JUN;RRM2;CDCA8;TTK;DTL
Roflumilast Up	6/149	0.204044	0.394726	0	0	1.54756	2.45973	FOXC1;MAP1A;CPE;ISG15;IFIT1;PHLDA3
Tadalafil Up	6/149	0.204044	0.394726	0	0	1.54756	2.45973	IFIH1;CDA;RPS19BP1;FN1;SORBS1;NOL3
ML-323 Down	5/139	0.308524	0.543265	0	0	1.37427	1.61608	ELOF1;BAG3;FN1;F11R;REXO4
SAR7334 Down	5/139	0.308524	0.543265	0	0	1.37427	1.61608	CEBPB;PLAUR;B2M;RSL24D1;SLC7A1
Perindopril Down	5/139	0.308524	0.543265	0	0	1.37427	1.61608	MMP14;GEMIN2;FN1;MICAL2;NOL3
CHEMBL570596 Up	5/140	0.313722	0.543265	0	0	1.36402	1.58124	NRP1;FAT1;PTPN21;IL6ST;RSL24D1
A 438079 Down	5/140	0.313722	0.543265	0	0	1.36402	1.58124	NRP1;CEBPB;COL14A1;EPDR1;S100A10
JW 480 Down	5/141	0.318932	0.543265	0	0	1.35392	1.54723	SLC11A2;TPM1;MYADM;VPS37C;B2M
PF 04447943 Down	5/141	0.318932	0.543265	0	0	1.35392	1.54723	NRP1;GTF2A1;PON3;LMOD1;NOL3
ACA Up	5/141	0.318932	0.543265	0	0	1.35392	1.54723	LMO4;LMOD1;TIMP2;ATM;TTC39B
2,4-Dichlorophenol Down	5/141	0.318932	0.543265	0	0	1.35392	1.54723	IFIH1;NRP1;COL14A1;ARHGDIB;PGPEP1
PF-514273 Down	5/141	0.318932	0.543265	0	0	1.35392	1.54723	PDLIM1;BAG3;FTH1;BCS1L;B2M
XAV 939 Down	5/141	0.318932	0.543265	0	0	1.35392	1.54723	ELOF1;IFRD1;FN1;CLTB;B2M
Olopatadine Up	5/141	0.318932	0.543265	0	0	1.35392	1.54723	NRP1;SLC11A2;EMB;PFN2;HAUS1
Macitentan Down	5/141	0.318932	0.543265	0	0	1.35392	1.54723	FN1;NF1;FAS;IFIT1;HAUS1
Indomethacin Up	5/141	0.318932	0.543265	0	0	1.35392	1.54723	TGFBR3;GTF2A1;JUN;SSNA1;EMB
LY 487379 Up	5/142	0.324152	0.543265	0	0	1.34397	1.51404	DAP;NQO2;FN1;KCTD12;ADAT2
SKF 89976A Up	5/142	0.324152	0.543265	0	0	1.34397	1.51404	IFIH1;GTF2A1;FKBP7;B2M;IGF1R
Nafamostat Up	5/142	0.324152	0.543265	0	0	1.34397	1.51404	TOR3A;P2RX4;RBP1;AHNAK2;VPS13A
Osilodrostat Up	5/142	0.324152	0.543265	0	0	1.34397	1.51404	JUN;ITGA3;PTPN21;HAUS1;ADAT2
Sitagliptin Up	5/142	0.324152	0.543265	0	0	1.34397	1.51404	COL1A1;ATG101;TPM2;NF1;IGF1R
Retigabine Down	5/142	0.324152	0.543265	0	0	1.34397	1.51404	NQO1;JUN;GEMIN2;PLAUR;PCBD2
ML218 Down	5/142	0.324152	0.543265	0	0	1.34397	1.51404	CDA;TPM1;NOL3;APBA3;DNPH1
ML221 Up	5/142	0.324152	0.543265	0	0	1.34397	1.51404	FARP2;NRP1;TGFB1I1;SYNPO;FSTL1
Lorcaserin Up	5/142	0.324152	0.543265	0	0	1.34397	1.51404	IFIH1;GPRC5A;TPM2;BSG;B2M
Orteronel Down	5/142	0.324152	0.543265	0	0	1.34397	1.51404	DAP;CLTB;ANXA6;SORBS1;RAD9A
4-Nitropiazthiole Down	5/143	0.329382	0.543265	0	0	1.33416	1.48164	CHID1;IMPACT;CSRP1;AHNAK2;GLG1
Benethamine Up	5/143	0.329382	0.543265	0	0	1.33416	1.48164	PRRX2;FN1;LMO7;ANTXR1;S100A10
LCL161 Down	5/143	0.329382	0.543265	0	0	1.33416	1.48164	SERPINE2;ACP6;DCXR;PDLIM5;PFN2
Org25543 Down	5/143	0.329382	0.543265	0	0	1.33416	1.48164	CDA;MED19;MAGED2;PDLIM5;DDA1
NSC 23766 Up	5/143	0.329382	0.543265	0	0	1.33416	1.48164	TPST2;PRIM2;CYB5A;PPP1R12B;TTC39B
BD 1008 Down	5/143	0.329382	0.543265	0	0	1.33416	1.48164	CHSY1;EOGT;FN1;PLCB1;THBS1
PHA 767491 Down	5/143	0.329382	0.543265	0	0	1.33416	1.48164	CEBPB;RPS19BP1;DDX56;FAT1;OSMR
Olanzapine Down	5/143	0.329382	0.543265	0	0	1.33416	1.48164	LGALS3;CYB5A;ECHS1;GLRX;NOL3
Febuxostat Up	5/143	0.329382	0.543265	0	0	1.33416	1.48164	TPM2;KCTD12;IFIT1;B2M;NES
Aripiprazole Up	5/143	0.329382	0.543265	0	0	1.33416	1.48164	LGALS3;TMEM59;LRP1;EPDR1;PTPN21
STK869906 Up	5/143	0.329382	0.543265	0	0	1.33416	1.48164	ATG101;GUK1;GEMIN2;BSG;POLR3H
SCHEMBL5061501 Down	5/143	0.329382	0.543265	0	0	1.33416	1.48164	DAP;LPGAT1;MYADM;FKBP7;GLRX
5-Ethynyluracil Up	5/143	0.329382	0.543265	0	0	1.33416	1.48164	ELOF1;TPM2;TPM1;COTL1;HSPB1
Alosetron Down	5/143	0.329382	0.543265	0	0	1.33416	1.48164	CD81;SESTD1;PRUNE2;PHLDA3;HAUS1
MERCK544 Down	5/143	0.329382	0.543265	0	0	1.33416	1.48164	ATG101;FTH1;CPE;B2M;DNPH1
Treprostinil Up	5/143	0.329382	0.543265	0	0	1.33416	1.48164	NRP1;GEMIN2;IFRD1;FN1;DNPH1
T-00127 Up	5/143	0.329382	0.543265	0	0	1.33416	1.48164	NRP1;GTF2A1;NQO2;TIMP2;PLAUR
Tafluprost Up	5/143	0.329382	0.543265	0	0	1.33416	1.48164	LRP1;TPM1;B2M;XDH;SH3D19
Uridine Down	5/143	0.329382	0.543265	0	0	1.33416	1.48164	COL14A1;GUK1;TGFB1I1;DNPH1;CRIP1
Desvenlafaxine Up	5/143	0.329382	0.543265	0	0	1.33416	1.48164	TOR3A;TPM2;DPH6;PLCD1;FOXP1
GNE-9605 Down	5/143	0.329382	0.543265	0	0	1.33416	1.48164	NRP1;JUN;RCN1;NF1;SORBS1
GW 441756 Up	5/143	0.329382	0.543265	0	0	1.33416	1.48164	RRM2;TPM2;PLAUR;GLRX;NES
Seratrodast Down	5/143	0.329382	0.543265	0	0	1.33416	1.48164	NQO1;COL14A1;FAS;APBA3;FSTL1
Oleanolic Acid Up	5/143	0.329382	0.543265	0	0	1.33416	1.48164	FARP1;RASSF1;CEBPB;FN1;SLC7A1
Nifedipine Up	5/143	0.329382	0.543265	0	0	1.33416	1.48164	NRP1;GTF2A1;FN1;FKBP7;RSL24D1
ZM 336372 Down	5/143	0.329382	0.543265	0	0	1.33416	1.48164	GTF2A1;LMO4;BAG3;FKBP7;GLRX
Sildenafil Down	5/144	0.334619	0.543265	0	0	1.32449	1.45001	LMOD1;PCBD2;IL6ST;PGPEP1;MYL9
KH7 Down	5/144	0.334619	0.543265	0	0	1.32449	1.45001	PRIM2;ISYNA1;FTH1;NES;ADAT2
Tafamidis Down	5/144	0.334619	0.543265	0	0	1.32449	1.45001	PRUNE2;FN1;FKBP7;APBA3;SH3D19
Glycyrrhizic Acid Up	5/144	0.334619	0.543265	0	0	1.32449	1.45001	ELF2;PRUNE2;PRRX2;CRIP2;OSMR
Tropicamide Down	5/144	0.334619	0.543265	0	0	1.32449	1.45001	CDA;TGFB1I1;SLC11A2;MED31;KCTD12
MRS 1754 Up	5/144	0.334619	0.543265	0	0	1.32449	1.45001	COL1A1;TGFBR3;P2RX4;EOGT;MED31
IBC 293 Down	5/144	0.334619	0.543265	0	0	1.32449	1.45001	RRM2;ATAD5;CDCA8;TTK;DTL
RWJ 50271 Up	5/144	0.334619	0.543265	0	0	1.32449	1.45001	NRP1;ACP6;PLAUR;IGF1R;PHLDA3
3-Deazaneplanocin A Up	5/144	0.334619	0.543265	0	0	1.32449	1.45001	SESTD1;ARHGDIB;IFIT1;IRF9;EPHB3
TC-O 9311 Down	5/144	0.334619	0.543265	0	0	1.32449	1.45001	NPEPL1;PALLD;IFRD1;CRIP1;ARPIN
Mirabegron Down	5/144	0.334619	0.543265	0	0	1.32449	1.45001	LGALS3;TPM1;MED31;FN1;NOL3
Benzbromarone Up	5/144	0.334619	0.543265	0	0	1.32449	1.45001	FOXC1;IFRD1;TIMP2;B2M;HAUS1
Rosiglitazone Down	5/144	0.334619	0.543265	0	0	1.32449	1.45001	FKBP7;ABAT;LMO7;NDRG1;SH3D19
AMN 082 Down	5/144	0.334619	0.543265	0	0	1.32449	1.45001	ELOF1;MYADM;NF1;CPE;IFIT1
SMI-16a Down	5/144	0.334619	0.543265	0	0	1.32449	1.45001	TMEM59;SNX18;MYADM;PGPEP1;RAD9A
H-1152 Up	5/144	0.334619	0.543265	0	0	1.32449	1.45001	DNPEP;COL5A1;LMOD1;FKBP7;PTPN21
Vernakalant Down	5/144	0.334619	0.543265	0	0	1.32449	1.45001	NRP1;LYRM4;BSG;PLAUR;IL6ST
Anacetrapib Up	5/144	0.334619	0.543265	0	0	1.32449	1.45001	TOR3A;TPM2;PLAUR;KCTD12;LPP
Bexarotene Up	5/144	0.334619	0.543265	0	0	1.32449	1.45001	CPT1A;VCAN;GLRX;DCTPP1;TTC39B
Quiflapon Down	5/144	0.334619	0.543265	0	0	1.32449	1.45001	TOR3A;CD81;BAG3;CPE;PGPEP1
NB-598 Down	5/144	0.334619	0.543265	0	0	1.32449	1.45001	GTF2A1;LMO4;ABAT;NOL3;PHLDA3
Capsazepine Down	5/144	0.334619	0.543265	0	0	1.32449	1.45001	H6PD;FTH1;IFIT1;SYNPO;S100A10
CA-074 Down	5/144	0.334619	0.543265	0	0	1.32449	1.45001	SESTD1;ANXA6;MED19;NOC4L;PLCD1
Cloprostenol Up	5/144	0.334619	0.543265	0	0	1.32449	1.45001	SESTD1;B2M;SNX8;DNPH1;EPHB3
Boc-4mesyloxypiperidine Up	5/144	0.334619	0.543265	0	0	1.32449	1.45001	FARP2;ARHGDIB;SLC11A2;B2M;ADAT2
Rislenemdaz Down	5/144	0.334619	0.543265	0	0	1.32449	1.45001	GUK1;EPDR1;SORBS1;ARFGAP3;APBA3
4,4-Dimethoxybenzil Up	5/144	0.334619	0.543265	0	0	1.32449	1.45001	GTF2A1;DAP;ELOF1;TPM2;TAPBP
2-Bromophenethylamine Down	5/144	0.334619	0.543265	0	0	1.32449	1.45001	BAG3;EPDR1;CRIP1;IRF9;CBR3
Cetirizine Up	5/144	0.334619	0.543265	0	0	1.32449	1.45001	CD81;BSG;DPH6;NAF1;PGPEP1
Gandotinib Down	5/144	0.334619	0.543265	0	0	1.32449	1.45001	HELLS;DTX3L;TPM2;GPC1;PBXIP1
Icotinib Up	5/144	0.334619	0.543265	0	0	1.32449	1.45001	JUN;GM2A;BSG;PLAUR;NDRG1
DMB Up	5/144	0.334619	0.543265	0	0	1.32449	1.45001	TUBB3;MYADM;DSTN;B2M;IGF1R
CP-673451 Up	5/144	0.334619	0.543265	0	0	1.32449	1.45001	JUN;FOXC1;B2M;MYL9;CRLF1
Nilotinib Down	5/144	0.334619	0.543265	0	0	1.32449	1.45001	NRP1;TMEM59;TPM1;FN1;PLAUR
Cytosporone B Down	5/145	0.339864	0.543265	0	0	1.31497	1.41912	H6PD;ARHGEF40;NUDT14;HAUS1;TTC39B
MLS0315771 Up	5/145	0.339864	0.543265	0	0	1.31497	1.41912	GM2A;LYRM4;FTH1;GLRX;NES
AK-54059 Down	5/145	0.339864	0.543265	0	0	1.31497	1.41912	GUK1;IFRD1;MYADM;FAS;PTGS1
Ruxolitinib Up	5/145	0.339864	0.543265	0	0	1.31497	1.41912	NRP1;FOXC1;FN1;MYL9;USP18
Abiraterone1 Up	5/145	0.339864	0.543265	0	0	1.31497	1.41912	FOXC1;ELOF1;FHL1;GLRX;LPP
CP 94253 Down	5/145	0.339864	0.543265	0	0	1.31497	1.41912	IFIH1;TGFBR3;FN1;ANXA6;GLRX
CGS 35066 Down	5/145	0.339864	0.543265	0	0	1.31497	1.41912	GTF2A1;IRGQ;TPM2;TPM1;B2M
LY 364947 Up	5/145	0.339864	0.543265	0	0	1.31497	1.41912	PDLIM1;GTF2A1;PDLIM2;ARHGDIB;KCTD12
SR 27897 Down	5/145	0.339864	0.543265	0	0	1.31497	1.41912	CDA;TMEM59;ABAT;NUDT14;PPIC
SB 216763 Up	5/145	0.339864	0.543265	0	0	1.31497	1.41912	FOXC1;RBP1;TMED3;DDX10;ACSL4
PF-514273 Up	5/145	0.339864	0.543265	0	0	1.31497	1.41912	IFIH1;JUN;CEBPB;ATAD5;JAK2
HC 067047 Up	5/145	0.339864	0.543265	0	0	1.31497	1.41912	MMP14;FOXC1;PTPRK;IL6ST;GLG1
Tizanidine Down	5/145	0.339864	0.543265	0	0	1.31497	1.41912	NQO2;FAS;ABAT;REXO4;PHLDA3
Repaglinide Up	5/145	0.339864	0.543265	0	0	1.31497	1.41912	TPST2;COL1A1;IRGQ;PRRX2;PCBD2
Turofexorate Down	5/145	0.339864	0.543265	0	0	1.31497	1.41912	JUN;RRM2;LMO4;GUK1;LMO7
Pazopanib Down	5/145	0.339864	0.543265	0	0	1.31497	1.41912	IFIH1;JUN;RRM2;SESTD1;TTK
CHEMBL2431803 Up	5/145	0.339864	0.543265	0	0	1.31497	1.41912	TMEM59;ABHD17B;SLC11A2;ANXA6;IL6ST
Finasteride Up	5/145	0.339864	0.543265	0	0	1.31497	1.41912	COL1A1;GPRC5A;DNPEP;CD81;B2M
Silmitasertib Down	5/145	0.339864	0.543265	0	0	1.31497	1.41912	IFIH1;VCAN;TPM2;FAT1;NES
Tafluprost Down	5/145	0.339864	0.543265	0	0	1.31497	1.41912	GPC1;EPDR1;FKBP7;PLCD1;CBR3
Bay 60-7550 Down	5/145	0.339864	0.543265	0	0	1.31497	1.41912	NRP1;JUN;ARHGDIB;MICAL2;NUDT14
Zofenopril Up	5/145	0.339864	0.543265	0	0	1.31497	1.41912	GTF2A1;TUBB3;TPM2;FN1;JAK2
Octreotide Up	5/145	0.339864	0.543265	0	0	1.31497	1.41912	CYB5A;GPRC5A;GLRX;PCBD2;HAUS1
Carprofen Down	5/145	0.339864	0.543265	0	0	1.31497	1.41912	CYB5A;DAP;MED31;ABAT;ARHGEF40
Mianserin Down	5/145	0.339864	0.543265	0	0	1.31497	1.41912	TMEM59;PLAUR;CPE;FAS;DNPH1
AM095 Up	5/145	0.339864	0.543265	0	0	1.31497	1.41912	DAP;ELF2;PRRX2;PCBD2;IFIT1
NS309 Up	5/145	0.339864	0.543265	0	0	1.31497	1.41912	LGALS3;TPM1;IL6ST;B2M;NDRG1
SKI II Down	5/145	0.339864	0.543265	0	0	1.31497	1.41912	CHID1;FARP1;SESTD1;ARHGDIB;CRLF1
Asimadoline Up	5/145	0.339864	0.543265	0	0	1.31497	1.41912	P2RX4;TIMP2;PBXIP1;PTPRK;JAK2
I3C Down	5/145	0.339864	0.543265	0	0	1.31497	1.41912	DAP;DNPEP;PLEKHO2;MYL9;DDA1
4-Benzylpyridine Up	5/145	0.339864	0.543265	0	0	1.31497	1.41912	COL2A1;ATG101;FN1;NUDT14;MYL9
Lasmiditan Up	5/145	0.339864	0.543265	0	0	1.31497	1.41912	TGFBR3;TGFB1I1;MAP1A;VPS37C;NUDT14
CH-223191 Down	5/145	0.339864	0.543265	0	0	1.31497	1.41912	JUN;NPEPL1;FTH1;GPC1;IL6ST
Ozagrel Up	5/145	0.339864	0.543265	0	0	1.31497	1.41912	DAP;ATG101;TPM2;PRRX2;PLAUR
ML-265 Down	5/146	0.345115	0.543265	0	0	1.30557	1.38897	JUN;TIMP2;MED19;IL6ST;NOL3
Ezatiostat Down	5/146	0.345115	0.543265	0	0	1.30557	1.38897	NRP1;DNPEP;LRP1;VPS37C;CRLF1
UPF 648 Up	5/146	0.345115	0.543265	0	0	1.30557	1.38897	GLTP;MGST1;KCTD12;PGLS;PCBD2
HMB-Val-Ser-Leu-VE Up	5/146	0.345115	0.543265	0	0	1.30557	1.38897	GTF2A1;IMPACT;LRP1;CTSL;FTH1
3-Benzotriazol-propionic Acid Up	5/146	0.345115	0.543265	0	0	1.30557	1.38897	PLAUR;ABAT;NES;FSTL1;ADAT2
Avosentan Up	5/146	0.345115	0.543265	0	0	1.30557	1.38897	ABAT;ANK3;PPP1R12B;SH3D19;ADAT2
Ethiprole Up	5/146	0.345115	0.543265	0	0	1.30557	1.38897	FOXC1;NPEPL1;ABAT;PTPRK;RAD9A
XEN 103 Up	5/146	0.345115	0.543265	0	0	1.30557	1.38897	ELF2;IFRD1;CKB;XDH;FOXP1
Bromopyruvic Acid Down	5/146	0.345115	0.543265	0	0	1.30557	1.38897	CYB5A;RBM25;DNPEP;NAF1;CKB
CHCA Up	5/146	0.345115	0.543265	0	0	1.30557	1.38897	DNPEP;EPDR1;PGLS;ANTXR1;HAUS1
Marimastat Down	5/146	0.345115	0.543265	0	0	1.30557	1.38897	ORC6;CCNT1;ADAM9;APBA3;HAUS1
Metyrapone Down	5/146	0.345115	0.543265	0	0	1.30557	1.38897	CYB5A;CD81;SLC11A2;B2M;RAD9A
NDT 9513727 Down	5/146	0.345115	0.543265	0	0	1.30557	1.38897	PON3;JUN;RRM2;ABAT;SLC7A1
Nafamostat Down	5/146	0.345115	0.543265	0	0	1.30557	1.38897	RCN1;NF1;PCBD2;PGPEP1;LPP
Raloxifene Down	5/146	0.345115	0.543265	0	0	1.30557	1.38897	COL1A1;DPP7;GM2A;PLAUR;PGPEP1
ML-323 Up	5/146	0.345115	0.543265	0	0	1.30557	1.38897	NQO2;PLAUR;PGLS;PGPEP1;HAUS1
BEC Up	5/146	0.345115	0.543265	0	0	1.30557	1.38897	TGFBR3;LMO4;SSNA1;CLTB;EMB
TC-N 22A Up	5/146	0.345115	0.543265	0	0	1.30557	1.38897	TPST2;NQO1;NQO2;PLAUR;EPDR1
LY2584702 Up	5/146	0.345115	0.543265	0	0	1.30557	1.38897	ANXA1;PRRX2;CLTB;PTPN21;KCTD12
Momelotinib Down	5/146	0.345115	0.543265	0	0	1.30557	1.38897	HELLS;CSRP2;RRM2;TPM2;NES
Sotrastaurin Down	5/146	0.345115	0.543265	0	0	1.30557	1.38897	NRP1;GPRC5A;CTSL;PLAUR;FAM3C
Acitretin Up	5/146	0.345115	0.543265	0	0	1.30557	1.38897	CYB5A;LRP1;LMO4;FN1;ARHGEF40
TMP269 Up	5/146	0.345115	0.543265	0	0	1.30557	1.38897	SCARB1;FYCO1;IL6ST;PDLIM5;HAUS1
AMN 082 Up	5/146	0.345115	0.543265	0	0	1.30557	1.38897	VCAN;FTH1;HSPB1;GLRX;SYNPO
D399-0002 Down	5/146	0.345115	0.543265	0	0	1.30557	1.38897	FTH1;SSNA1;IFRD1;B2M;IRF9
Dexrazoxane Down	5/146	0.345115	0.543265	0	0	1.30557	1.38897	COL14A1;GUK1;PLEKHO2;PCBD2;B2M
KH-CB19 Down	5/146	0.345115	0.543265	0	0	1.30557	1.38897	LMO4;AHNAK2;NOL3;NDRG1;NES
Migalastat Up	5/146	0.345115	0.543265	0	0	1.30557	1.38897	GEMIN2;BUD31;HSPB1;EZR;B2M
Teijin Compound 1 Down	5/146	0.345115	0.543265	0	0	1.30557	1.38897	SESTD1;TPM1;SYNPO;B2M;IGF1R
T3 Down	5/146	0.345115	0.543265	0	0	1.30557	1.38897	NRP1;RASSF1;P2RX4;BSG;DNPH1
FTI-277 Down	5/146	0.345115	0.543265	0	0	1.30557	1.38897	NRP1;CEBPB;CPE;PLCB1;CRIP1
Bay 60-7550 Up	5/146	0.345115	0.543265	0	0	1.30557	1.38897	TGFBR3;GM2A;CD81;ISG15;B2M
Rivastigmine Up	5/146	0.345115	0.543265	0	0	1.30557	1.38897	RPS19BP1;PRUNE2;NAF1;IFIT1;B2M
TAE 226 Down	5/146	0.345115	0.543265	0	0	1.30557	1.38897	JUN;RRM2;KCTD12;NES;DTL
AZD1152 Down	5/146	0.345115	0.543265	0	0	1.30557	1.38897	JUN;LRP1;NF1;DTL;FAM107B
MRS 2578 Down	5/146	0.345115	0.543265	0	0	1.30557	1.38897	ALAD;CYB5A;ABAT;IFIT1;B2M
Azilsartan Up	5/146	0.345115	0.543265	0	0	1.30557	1.38897	HELLS;RRM2;ATAD5;SSNA1;HAUS1
Atosiban Up	5/146	0.345115	0.543265	0	0	1.30557	1.38897	COL18A1;NRP1;HELLS;RRM2;VPS37C
SP600125 Up	5/146	0.345115	0.543265	0	0	1.30557	1.38897	NRP1;CYB5A;IFRD1;MED31;FHL1
Rifampicin Down	5/146	0.345115	0.543265	0	0	1.30557	1.38897	CDA;IRGQ;FN1;CPE;SORBS1
Taranabant Down	5/146	0.345115	0.543265	0	0	1.30557	1.38897	TOR3A;RRM2;SSNA1;CDCA8;SLC7A1
Roflumilast Down	5/146	0.345115	0.543265	0	0	1.30557	1.38897	TOR3A;NRP1;PLAUR;MICAL2;PGLS
RK-24466 Down	5/146	0.345115	0.543265	0	0	1.30557	1.38897	ARHGDIB;PLA2G4A;GLRX;KCTD12;DCTPP1
6-Aminochrysene Up	5/146	0.345115	0.543265	0	0	1.30557	1.38897	IFIH1;TMEM59;SSNA1;MGST1;IFIT1
Guanethidine Up	5/146	0.345115	0.543265	0	0	1.30557	1.38897	DAP;SSNA1;VPS37C;IRF9;CBR3
TAK-285 Down	5/146	0.345115	0.543265	0	0	1.30557	1.38897	TOR3A;GTF2A1;BCS1L;B2M;SIL1
Clorgiline Down	5/146	0.345115	0.543265	0	0	1.30557	1.38897	JUN;TAGLN;COL5A1;BSG;NDRG1
Tozasertib Down	5/146	0.345115	0.543265	0	0	1.30557	1.38897	ORC6;RRM2;DDX24;PLAUR;DTL
Zaltoprofen Up	5/146	0.345115	0.543265	0	0	1.30557	1.38897	FOXC1;DNPEP;TPM2;PKP2;NES
6-Mercaptopurine Up	5/146	0.345115	0.543265	0	0	1.30557	1.38897	RCN1;TPM2;IFIT1;B2M;NES
Bafilomycin A1 Down	5/146	0.345115	0.543265	0	0	1.30557	1.38897	DPP7;FTH1;TPM2;EPDR1;HSPB1
4EGI-1 Up	5/147	0.350371	0.543265	0	0	1.29631	1.35952	PON3;RRM2;DTX3L;LRP1;PARP9
CAY10550 Up	5/147	0.350371	0.543265	0	0	1.29631	1.35952	SLC11A2;TTK;POLR3H;NOL3;NES
Senicapoc Down	5/147	0.350371	0.543265	0	0	1.29631	1.35952	LGALS3;CLTB;GLRX;PGLS;DCTPP1
RRD-251 Down	5/147	0.350371	0.543265	0	0	1.29631	1.35952	MMP14;NPEPL1;FN1;PTPRK;ADAT2
Dicyclohexylamine Up	5/147	0.350371	0.543265	0	0	1.29631	1.35952	CYB5A;ELOF1;PGLS;EPHB3;EZH2
1,4-DHNA Down	5/147	0.350371	0.543265	0	0	1.29631	1.35952	ELOF1;TPM2;ACP6;B2M;ARPIN
RN486 Down	5/147	0.350371	0.543265	0	0	1.29631	1.35952	CHID1;HELLS;RRM2;CDCA8;USP18
Marimastat Up	5/147	0.350371	0.543265	0	0	1.29631	1.35952	CEBPB;LPGAT1;CTSL;FN1;SLC7A1
ZJ 43 Down	5/147	0.350371	0.543265	0	0	1.29631	1.35952	COL14A1;PLAUR;PGLS;DCTPP1;SH3D19
4-Methylhistamine Up	5/147	0.350371	0.543265	0	0	1.29631	1.35952	LMO4;SLC11A2;KCTD12;IL6ST;B2M
GBR 12909 Down	5/147	0.350371	0.543265	0	0	1.29631	1.35952	RRM2;CDCA8;TTK;DTL;USP18
L-741 Down	5/147	0.350371	0.543265	0	0	1.29631	1.35952	EHD2;FOXC1;ATM;MYL9;IRF9
Tacrine Up	5/147	0.350371	0.543265	0	0	1.29631	1.35952	RRM2;TPM2;TGFB1I1;IL6ST;DNPH1
BX 912 Down	5/147	0.350371	0.543265	0	0	1.29631	1.35952	HELLS;RRM2;ARHGEF40;NES;DTL
Actinonin Down	5/147	0.350371	0.543265	0	0	1.29631	1.35952	TMEM59;APPBP2;SESTD1;TIMP2;IFIT1
HJC0350 Down	5/147	0.350371	0.543265	0	0	1.29631	1.35952	TGFBR3;CYB5A;TMEM59;FN1;DDA1
Meloxicam Up	5/147	0.350371	0.543265	0	0	1.29631	1.35952	TPM2;LMOD1;NAF1;KCTD12;KCTD15
Entinostat Down	5/147	0.350371	0.543265	0	0	1.29631	1.35952	MMP14;VCAN;PDLIM2;PLAUR;DTL
Lalistat1 Up	5/147	0.350371	0.543265	0	0	1.29631	1.35952	PON3;TMEM59;TGFB1I1;PLCB1;PLCD1
CHEMBL1597046 Up	5/147	0.350371	0.543265	0	0	1.29631	1.35952	PLAUR;EPDR1;KCTD12;DNPH1;ADAT2
CHEMBL2397099 Up	5/147	0.350371	0.543265	0	0	1.29631	1.35952	TMED3;TMEM209;PTPRK;B2M;XDH
Castanospermine Down	5/147	0.350371	0.543265	0	0	1.29631	1.35952	PON3;JUN;LMO4;FN1;FAS
H-1152 Down	5/147	0.350371	0.543265	0	0	1.29631	1.35952	CDA;BAG3;TPM2;ANXA6;NOL3
Olaparib Down	5/147	0.350371	0.543265	0	0	1.29631	1.35952	JUN;CEBPB;TGFB1I1;SLC11A2;S100A10
Rivastigmine Down	5/147	0.350371	0.543265	0	0	1.29631	1.35952	GTF2A1;FTH1;SSNA1;MED31;APBA3
EPZ-6438 Up	5/147	0.350371	0.543265	0	0	1.29631	1.35952	NRP1;CYB5A;TPM1;SORBS1;NES
Guanfacine Up	5/147	0.350371	0.543265	0	0	1.29631	1.35952	CEBPB;JAK2;ANTXR1;DNPH1;SH3D19
NBI-74330 Up	5/147	0.350371	0.543265	0	0	1.29631	1.35952	HELLS;RRM2;ATAD5;PRIM1;FOXP1
VU0152100 Down	5/147	0.350371	0.543265	0	0	1.29631	1.35952	TPST2;JUN;P2RX4;COL14A1;B2M
LXR-623 Down	5/147	0.350371	0.543265	0	0	1.29631	1.35952	NRP1;JUN;P2RX4;NOL3;NUDT14
PS-1145 Up	5/147	0.350371	0.543265	0	0	1.29631	1.35952	GTF2A1;FOXC1;PRRX2;PDLIM5;CRLF1
PD 123319 Down	5/147	0.350371	0.543265	0	0	1.29631	1.35952	CTSL;EPDR1;NDRG1;FAM107B;S100A10
TRAM-34 Down	5/147	0.350371	0.543265	0	0	1.29631	1.35952	CD81;MYADM;PLAUR;NOL3;B2M
KU-60019 Down	5/147	0.350371	0.543265	0	0	1.29631	1.35952	RRM2;TFRC;TPM2;ECE1;TTK
NP118809 Down	5/147	0.350371	0.543265	0	0	1.29631	1.35952	FOXC1;RRM2;ATG101;PRRX2;B2M
CJ-42794 Up	5/147	0.350371	0.543265	0	0	1.29631	1.35952	FN1;PBXIP1;SYNPO;PARP9;NOL3
GW7647 Down	5/147	0.350371	0.543265	0	0	1.29631	1.35952	DAP;SBDS;EPDR1;ATP1B1;DNPH1
A 967079 Down	5/147	0.350371	0.543265	0	0	1.29631	1.35952	SLC11A2;PGPEP1;NDRG1;FSTL1;IRF9
ABL127 Down	5/147	0.350371	0.543265	0	0	1.29631	1.35952	GTF2A1;MLKL;ABAT;IFIT1;RSL24D1
Evacetrapib Down	5/147	0.350371	0.543265	0	0	1.29631	1.35952	GPRC5A;CALD1;IFIT1;JAK2;IGF1R
CAY10650 Up	5/147	0.350371	0.543265	0	0	1.29631	1.35952	GPRC5A;GUK1;TPM2;POLR3H;FAM107B
Entospletinib Up	5/147	0.350371	0.543265	0	0	1.29631	1.35952	NT5C;GLO1;ISG15;IFIT1;XDH
TAK-285 Up	5/147	0.350371	0.543265	0	0	1.29631	1.35952	NRP1;TMEM59;FTH1;PLAUR;NDRG1
Mardepodect Down	5/147	0.350371	0.543265	0	0	1.29631	1.35952	HEBP1;TPM1;FN1;FKBP7;ANTXR1
CP-673451 Down	5/147	0.350371	0.543265	0	0	1.29631	1.35952	LGALS3;IFRD1;TIMP2;MICAL2;NDRG1
Tiplaxtinin Up	5/148	0.355632	0.543265	0	0	1.28718	1.33076	GLTP;PRUNE2;PLAUR;CRLF1;PFN2
AZD1152-HQPA Up	5/148	0.355632	0.543265	0	0	1.28718	1.33076	IKBIP;NQO1;FAS;ITM2B;PHLDA3
BMS309403 Up	5/148	0.355632	0.543265	0	0	1.28718	1.33076	DAP;TPM2;SSNA1;NOL3;HAUS1
BBL003126 Up	5/148	0.355632	0.543265	0	0	1.28718	1.33076	JUN;PLA2G4A;LMO7;SORBS1;IFIT1
NSC43673 Down	5/148	0.355632	0.543265	0	0	1.28718	1.33076	URI1;FN1;MICAL2;PARP9;EPHB3
ML365 Down	5/148	0.355632	0.543265	0	0	1.28718	1.33076	NPEPL1;ACP6;PTPRK;CRLF1;SH3D19
STX-0119 Up	5/148	0.355632	0.543265	0	0	1.28718	1.33076	VPS37C;FKBP7;PARP9;DNPH1;RAD9A
CHEMBL2172374 Down	5/148	0.355632	0.543265	0	0	1.28718	1.33076	NRP1;JUN;VCAN;FN1;NDRG1
PAP-1 Down	5/148	0.355632	0.543265	0	0	1.28718	1.33076	DNPEP;LYRM4;CALD1;PTPRK;NUDT14
AM 630 Down	5/148	0.355632	0.543265	0	0	1.28718	1.33076	TOR3A;TMEM59;CD81;IFRD1;PLCD1
Palbociclib Down	5/148	0.355632	0.543265	0	0	1.28718	1.33076	HELLS;RRM2;KIF14;CDCA8;TTK
Metolazone Up	5/148	0.355632	0.543265	0	0	1.28718	1.33076	RAB4B;SSNA1;MAP1A;PFN2;ADAT2
Paroxetine Up	5/148	0.355632	0.543265	0	0	1.28718	1.33076	LGALS3;CYB5A;BAG3;PBXIP1;KCTD12
Vatalanib Up	5/148	0.355632	0.543265	0	0	1.28718	1.33076	NRP1;FN1;NF1;PLAUR;PPIC
CHEMBL569227 Up	5/148	0.355632	0.543265	0	0	1.28718	1.33076	GLTP;NQO1;ATG101;NF1;PDLIM5
Resmetirom Down	5/148	0.355632	0.543265	0	0	1.28718	1.33076	PON3;ELOF1;FAS;CRIP2;PGPEP1
RF9 Up	5/148	0.355632	0.543265	0	0	1.28718	1.33076	DNPEP;CMC2;KCTD12;DNPH1;S100A10
MBX-2982 Down	5/148	0.355632	0.543265	0	0	1.28718	1.33076	TGFBR3;TTK;NES;DTL;HAUS1
Ro-3306 Down	5/148	0.355632	0.543265	0	0	1.28718	1.33076	TPM2;AHNAK2;PLAUR;PTPN21;NES
2-Cl-IB-MECA Up	5/148	0.355632	0.543265	0	0	1.28718	1.33076	DAP;FN1;CLTB;GLRX;IFIT1
TRAM-34 Up	5/148	0.355632	0.543265	0	0	1.28718	1.33076	RCN1;LMO4;PBXIP1;SYNPO;PHLDA3
MRE-269 Up	5/148	0.355632	0.543265	0	0	1.28718	1.33076	CD81;NOC4L;PCBD2;IFIT1;B2M
INT-747 Down	5/148	0.355632	0.543265	0	0	1.28718	1.33076	JUN;RPS19BP1;GPC1;GLRX;PPP1R12B
Cyanuric Chloride Up	5/148	0.355632	0.543265	0	0	1.28718	1.33076	ABHD17B;COL14A1;PRRX2;MYADM;NF1
WH-4-023 Down	5/148	0.355632	0.543265	0	0	1.28718	1.33076	HELLS;ORC6;RRM2;ATAD5;DTL
AXL1717 Down	5/148	0.355632	0.543265	0	0	1.28718	1.33076	PDLIM2;RPS19BP1;PDCD11;DDX10;WDR46
GSK343 Up	5/149	0.360895	0.546991	0	0	1.27817	1.30267	TMEM59;IDH1;PLAUR;JAK2;PLCD1
Torcetrapib Down	5/149	0.360895	0.546991	0	0	1.27817	1.30267	JUN;CEBPB;RRM2;LMO4;IFRD1
RWJ 50271 Down	5/149	0.360895	0.546991	0	0	1.27817	1.30267	CALD1;FN1;MED19;IFIT1;OSMR
AZD8055 Down	5/149	0.360895	0.546991	0	0	1.27817	1.30267	RRM2;TPM2;TTK;OSMR;TTC39B
Vorinostat Down	5/149	0.360895	0.546991	0	0	1.27817	1.30267	NRP1;VCAN;FOXC1;DTX3L;OSMR
UAMC00039 Up	5/149	0.360895	0.546991	0	0	1.27817	1.30267	SCARB1;FTH1;IFRD1;EPDR1;ITM2C
2-Cl-IB-MECA Down	5/149	0.360895	0.546991	0	0	1.27817	1.30267	TOR3A;NRP1;VCAN;CD81;TBC1D2B
GSK-1070916 Down	5/149	0.360895	0.546991	0	0	1.27817	1.30267	NRP1;HELLS;ORC6;RRM2;DTL
Abemaciclib Down	5/149	0.360895	0.546991	0	0	1.27817	1.30267	HELLS;RRM2;DTX3L;ATAD5;TTK
Terbinafine Down	5/150	0.366161	0.554009	0	0	1.26929	1.27524	COL1A1;FN1;PCBD2;NUDT14;TTC39B
Pepstatin A Down	5/150	0.366161	0.554009	0	0	1.26929	1.27524	COL2A1;COL14A1;TPM1;CRIP2;PLCD1
Isotretinoin Down	4/137	0.493481	0.695046	0	0	1.10563	0.780879	CYB5A;ACP6;RBP1;FN1
Anamorelin Down	4/139	0.504805	0.695046	0	0	1.08914	0.74452	PRPF38B;CTSL;PDS5B;CHD3
KH-CB19 Up	4/139	0.504805	0.695046	0	0	1.08914	0.74452	ISYNA1;VPS13A;ITM2B;PHLDA3
TAK-875 Up	4/140	0.510425	0.695046	0	0	1.08108	0.727038	GM2A;TPM2;CRIP1;S100A10
PF-543 Down	4/140	0.510425	0.695046	0	0	1.08108	0.727038	PRPF38B;FN1;MED19;CRIP1
Tubastatin A Down	4/140	0.510425	0.695046	0	0	1.08108	0.727038	FTH1;IFRD1;PCBD2;NUDT14
Epristeride Up	4/140	0.510425	0.695046	0	0	1.08108	0.727038	CDA;NF1;MED19;PLEKHO2
SH-4-54 Up	4/140	0.510425	0.695046	0	0	1.08108	0.727038	RASSF1;ABHD17B;TPM2;B2M
HPGDS-In1 Down	4/141	0.516016	0.695046	0	0	1.07313	0.710003	LRP1;IFRD1;ARHGEF40;PHLDA3
Parecoxib Up	4/141	0.516016	0.695046	0	0	1.07313	0.710003	MPP2;ALCAM;DNPEP;TIMP2
Fevipiprant Up	4/141	0.516016	0.695046	0	0	1.07313	0.710003	FARP2;LMO4;FN1;PPP1R12B
GSK 650394 Down	4/141	0.516016	0.695046	0	0	1.07313	0.710003	HELLS;JUN;CEBPB;ELF2
Talazoparib Down	4/141	0.516016	0.695046	0	0	1.07313	0.710003	RASSF1;CEBPB;IFRD1;NOL3
Pramipexole Up	4/141	0.516016	0.695046	0	0	1.07313	0.710003	PRKCI;VPS37C;SRFBP1;TTC39B
SCH 58261 Down	4/141	0.516016	0.695046	0	0	1.07313	0.710003	MMP14;COL14A1;GEMIN2;FAS
HPGDS-In1 Up	4/142	0.521577	0.695046	0	0	1.0653	0.693402	ATAD5;TPM2;POLR3H;NES
Ko143 Down	4/142	0.521577	0.695046	0	0	1.0653	0.693402	CDA;VCAN;ARHGDIB;PARP9
SR 27897 Up	4/142	0.521577	0.695046	0	0	1.0653	0.693402	FARP2;SORBS1;MDN1;IRF9
SR 11237 Up	4/142	0.521577	0.695046	0	0	1.0653	0.693402	PON3;CPT1A;VCAN;B2M
CHEMBL570596 Down	4/142	0.521577	0.695046	0	0	1.0653	0.693402	TPM1;PBXIP1;IFIT1;OSMR
Alectinib Up	4/142	0.521577	0.695046	0	0	1.0653	0.693402	TMEM59;JUN;BAG3;ISG15
GK01981 Up	4/142	0.521577	0.695046	0	0	1.0653	0.693402	PRRX2;CPE;NUDT14;ADAT2
Conivaptan Down	4/142	0.521577	0.695046	0	0	1.0653	0.693402	COL18A1;TGFB1I1;LMOD1;IGF1R
Fluticasone Down	4/142	0.521577	0.695046	0	0	1.0653	0.693402	TOR3A;LMOD1;PTPN21;NUDT14
Cilengitide Down	4/142	0.521577	0.695046	0	0	1.0653	0.693402	CYB5A;KCTD12;B2M;PHLDA3
GW9508 Down	4/142	0.521577	0.695046	0	0	1.0653	0.693402	GTF2A1;FN1;NUDT14;S100A10
Timapiprant Up	4/142	0.521577	0.695046	0	0	1.0653	0.693402	LGALS3;P2RX4;LMO7;GLRX
GW842166X Down	4/142	0.521577	0.695046	0	0	1.0653	0.693402	LPGAT1;APBA3;ANTXR1;FOXP1
Acenaphthoquinone Up	4/142	0.521577	0.695046	0	0	1.0653	0.693402	NQO1;ISYNA1;KCTD12;SYNPO
Molindone Up	4/142	0.521577	0.695046	0	0	1.0653	0.693402	ANXA1;TUBB3;PRRX2;EZR
Cimetidine Down	4/142	0.521577	0.695046	0	0	1.0653	0.693402	RCN1;NOL3;SOD2;CBR3
Rofecoxib Down	4/142	0.521577	0.695046	0	0	1.0653	0.693402	IFIH1;CLTB;PLAUR;SOD2
GSK4112 Down	4/143	0.527108	0.695046	0	0	1.05758	0.677222	NRP1;CEBPB;PLAUR;PTPN21
Undecanoic Acid Up	4/143	0.527108	0.695046	0	0	1.05758	0.677222	LMOD1;ATM;PARP9;NOL3
Ac-YVAD-CHO Up	4/143	0.527108	0.695046	0	0	1.05758	0.677222	GAMT;VPS37C;KCTD12;HAUS1
Basimglurant Up	4/143	0.527108	0.695046	0	0	1.05758	0.677222	SCARB1;FN1;PGPEP1;DNPH1
BW 723C86 Down	4/143	0.527108	0.695046	0	0	1.05758	0.677222	COL14A1;TGFB1I1;VPS37C;AMPD3
RGFP966 Down	4/143	0.527108	0.695046	0	0	1.05758	0.677222	TOR3A;MEPCE;SERPINH1;ADAT2
Climbazole Down	4/143	0.527108	0.695046	0	0	1.05758	0.677222	JUN;LMO4;FTH1;OSMR
Alosetron Up	4/143	0.527108	0.695046	0	0	1.05758	0.677222	NQO1;EPDR1;FAS;RSL24D1
Eletriptan Up	4/143	0.527108	0.695046	0	0	1.05758	0.677222	FTH1;TIMP2;ANTXR1;HAUS1
Diethylstilbestrol Up	4/143	0.527108	0.695046	0	0	1.05758	0.677222	BAG3;TGFB1I1;PHLDA3;DDA1
Lixivaptan Up	4/143	0.527108	0.695046	0	0	1.05758	0.677222	NRP1;CD81;COL14A1;CPE
PCI-34051 Down	4/143	0.527108	0.695046	0	0	1.05758	0.677222	PRIM2;LMO4;FTH1;EMB
Rifampicin Up	4/143	0.527108	0.695046	0	0	1.05758	0.677222	P2RX4;AGA;FSTL1;IGF1R
L755507 Down	4/143	0.527108	0.695046	0	0	1.05758	0.677222	TGFB1I1;CRIP2;APBA3;PTGS1
GSK-LSD1 Down	4/143	0.527108	0.695046	0	0	1.05758	0.677222	DAP;GEMIN2;TGFB1I1;PTPN21
Purvalanol Up	4/143	0.527108	0.695046	0	0	1.05758	0.677222	GEMIN2;TGFB1I1;RBP1;CRLF1
Leupeptin Down	4/143	0.527108	0.695046	0	0	1.05758	0.677222	DAP;ELOF1;PCBD2;PFN2
HA130 Down	4/143	0.527108	0.695046	0	0	1.05758	0.677222	FARP2;JUN;NPEPL1;SIL1
GSK126 Down	4/143	0.527108	0.695046	0	0	1.05758	0.677222	NT5C;NF1;HSPB1;SLC7A1
Nitisinone Up	4/144	0.532608	0.695046	0	0	1.04997	0.661452	NF1;B2M;USP18;FAM107B
SSR 69071 Down	4/144	0.532608	0.695046	0	0	1.04997	0.661452	DPP7;DTX3L;CAT;GLG1
Sildenafil Up	4/144	0.532608	0.695046	0	0	1.04997	0.661452	LMO4;SSNA1;MAP1A;SORBS1
AGN 190299 Down	4/144	0.532608	0.695046	0	0	1.04997	0.661452	GTF2A1;GLRX;PCBD2;OSMR
MPI-0479605-HCL Down	4/144	0.532608	0.695046	0	0	1.04997	0.661452	ELOF1;ATAD5;TTK;MYL9
CBIO Down	4/144	0.532608	0.695046	0	0	1.04997	0.661452	FOXC1;HSPB1;GLRX;NOL3
Thymidine Down	4/144	0.532608	0.695046	0	0	1.04997	0.661452	ELF2;BAG3;FN1;DDA1
Abiraterone1 Down	4/144	0.532608	0.695046	0	0	1.04997	0.661452	TOR3A;MYADM;EPDR1;FAM3C
BIX 01294 Down	4/144	0.532608	0.695046	0	0	1.04997	0.661452	SSNA1;POLR3H;NES;LGMN
TR-14035 Up	4/144	0.532608	0.695046	0	0	1.04997	0.661452	KANK1;ELF2;ATM;KCTD15
CAY10683 Up	4/144	0.532608	0.695046	0	0	1.04997	0.661452	FARP2;DNPEP;FN1;KCTD12
HX 531 Down	4/144	0.532608	0.695046	0	0	1.04997	0.661452	IFIH1;SERPINE2;PGPEP1;EPHB3
Esmolol Down	4/144	0.532608	0.695046	0	0	1.04997	0.661452	IFIH1;CPE;CRIP1;PHLDA3
Yohimbine Up	4/144	0.532608	0.695046	0	0	1.04997	0.661452	LMO4;TPM2;FN1;ARHGEF40
TGX-221 Up	4/144	0.532608	0.695046	0	0	1.04997	0.661452	GPRC5A;FAS;PBXIP1;FAM3C
KM03430 Up	4/144	0.532608	0.695046	0	0	1.04997	0.661452	ARHGDIB;AHNAK2;NF1;NUDT14
Z32036776 Up	4/144	0.532608	0.695046	0	0	1.04997	0.661452	COL1A1;COL2A1;ELOF1;ATG101
MERCK544 Up	4/144	0.532608	0.695046	0	0	1.04997	0.661452	DNPEP;PRUNE2;SORBS1;IGF1R
CHEMBL383736 Up	4/144	0.532608	0.695046	0	0	1.04997	0.661452	ARHGDIB;EPDR1;JAK2;APBA3
Osilodrostat Down	4/144	0.532608	0.695046	0	0	1.04997	0.661452	COL5A1;LRP1;ANXA6;NUDT14
Eletriptan Down	4/144	0.532608	0.695046	0	0	1.04997	0.661452	CALD1;LMOD1;EPHB3;TTC39B
PD173212 Up	4/144	0.532608	0.695046	0	0	1.04997	0.661452	NRP1;FN1;PTPN21;AGPAT1
Dichlorisone Down	4/144	0.532608	0.695046	0	0	1.04997	0.661452	LMOD1;TIMP2;SORBS1;NUDT14
Roxatidine Up	4/144	0.532608	0.695046	0	0	1.04997	0.661452	ELOF1;RRAS;TPM2;B2M
Maraviroc Down	4/144	0.532608	0.695046	0	0	1.04997	0.661452	TGFBR3;ARHGDIB;SYNPO;PLCB1
R121919 Up	4/144	0.532608	0.695046	0	0	1.04997	0.661452	NRP1;TGFB1I1;IFRD1;CRIP1
Pinometostat Down	4/144	0.532608	0.695046	0	0	1.04997	0.661452	TPST2;LPGAT1;GLRX;AGPAT1
XEN445 Down	4/144	0.532608	0.695046	0	0	1.04997	0.661452	SESTD1;FN1;PGPEP1;ANTXR1
Selisistat Up	4/144	0.532608	0.695046	0	0	1.04997	0.661452	ORC6;RRM2;TPM2;NES
INCB 3284 Up	4/144	0.532608	0.695046	0	0	1.04997	0.661452	LMOD1;ANTXR1;B2M;NES
AM095 Down	4/144	0.532608	0.695046	0	0	1.04997	0.661452	GPRC5A;PLAUR;VPS13A;PGPEP1
PRX-08066 Up	4/144	0.532608	0.695046	0	0	1.04997	0.661452	NRP1;CEBPB;FHL1;IGF1R
DP-agonist13 Up	4/144	0.532608	0.695046	0	0	1.04997	0.661452	DTX3L;SSNA1;FN1;DCTPP1
Chloro-L-alanine Up	4/144	0.532608	0.695046	0	0	1.04997	0.661452	RASSF1;RPS19BP1;IFRD1;CBR3
I3C Up	4/144	0.532608	0.695046	0	0	1.04997	0.661452	PTPN21;APBA3;B2M;ITM2C
Lorcaserin Down	4/144	0.532608	0.695046	0	0	1.04997	0.661452	FTH1;MED19;JAK2;S100A10
Linagliptin Up	4/144	0.532608	0.695046	0	0	1.04997	0.661452	TPM2;PRRX2;NAF1;KCTD12
Cimetidine Up	4/144	0.532608	0.695046	0	0	1.04997	0.661452	GTF2A1;PRRX2;FN1;SYNPO
Defactinib Down	4/144	0.532608	0.695046	0	0	1.04997	0.661452	COL18A1;MYADM;PBXIP1;NOL3
Blonanserin Down	4/145	0.538075	0.695046	0	0	1.04247	0.646079	CD81;MICAL2;BCS1L;SLC7A1
Ticagrelor Up	4/145	0.538075	0.695046	0	0	1.04247	0.646079	NRP1;H6PD;IFRD1;NUDT14
Bromfenac Down	4/145	0.538075	0.695046	0	0	1.04247	0.646079	CPT1A;LYRM4;DSTN;APBA3
CHEMBL217125 Down	4/145	0.538075	0.695046	0	0	1.04247	0.646079	FARP2;TPM1;GOLIM4;APBA3
(RS)-PPG Down	4/145	0.538075	0.695046	0	0	1.04247	0.646079	ACP6;IFRD1;DSTN;PFN2
7-Hydroxycoumarine Up	4/145	0.538075	0.695046	0	0	1.04247	0.646079	ISYNA1;TPM2;CLTB;FSTL1
7-Hydroxycoumarine Down	4/145	0.538075	0.695046	0	0	1.04247	0.646079	NRP1;FOXC1;IFRD1;PLAUR
CyPPA Down	4/145	0.538075	0.695046	0	0	1.04247	0.646079	HELLS;ALDH2;IL6ST;PTGS1
W-13 HCl Down	4/145	0.538075	0.695046	0	0	1.04247	0.646079	LMO4;GEMIN2;MYADM;KCTD12
A 803467 Up	4/145	0.538075	0.695046	0	0	1.04247	0.646079	LMO4;MYADM;FN1;VPS13A
ARL 17477 Down	4/145	0.538075	0.695046	0	0	1.04247	0.646079	RRM2;EPDR1;CDCA8;LGMN
ZD 7288 Down	4/145	0.538075	0.695046	0	0	1.04247	0.646079	COL1A1;PON3;P2RX4;MYL9
Cyclopamine Down	4/145	0.538075	0.695046	0	0	1.04247	0.646079	ABHD17B;SSNA1;ECE1;PCBD2
Histamine Up	4/145	0.538075	0.695046	0	0	1.04247	0.646079	FOXC1;SESTD1;PLAUR;ARHGEF40
7,8-Dihydroxyflavone Down	4/145	0.538075	0.695046	0	0	1.04247	0.646079	PRIM2;FTH1;IFRD1;DUSP9
AUDA Up	4/145	0.538075	0.695046	0	0	1.04247	0.646079	ENAH;FARP2;ACP6;KCTD12
P005091 Down	4/145	0.538075	0.695046	0	0	1.04247	0.646079	GTF2A1;GM2A;LMO4;PCBD2
Quetiapine Down	4/145	0.538075	0.695046	0	0	1.04247	0.646079	LYRM4;NF1;PLAUR;PCBD2
Erythromycin Down	4/145	0.538075	0.695046	0	0	1.04247	0.646079	PLAUR;ABAT;IL6ST;NUDT14
STK869906 Down	4/145	0.538075	0.695046	0	0	1.04247	0.646079	CYB5A;LMO4;IL6ST;IGF1R
RH00511 Down	4/145	0.538075	0.695046	0	0	1.04247	0.646079	GPRC5A;FN1;B2M;IGF1R
Silodosin Down	4/145	0.538075	0.695046	0	0	1.04247	0.646079	CPE;NOL3;FSTL1;XDH
Minocycline Down	4/145	0.538075	0.695046	0	0	1.04247	0.646079	TGFB1I1;PDLIM5;B2M;CRIP1
Tazarotene1 Up	4/145	0.538075	0.695046	0	0	1.04247	0.646079	IFIH1;GEMIN2;VPS37C;ADAR
PJ34 Up	4/145	0.538075	0.695046	0	0	1.04247	0.646079	CYB5A;ATG101;FTH1;DCTPP1
c-Fms-IN-3 Up	4/145	0.538075	0.695046	0	0	1.04247	0.646079	HELLS;RRM2;ATAD5;HAUS1
Tacrolimus Up	4/145	0.538075	0.695046	0	0	1.04247	0.646079	CYB5A;PRRX2;CRIP2;AGPAT1
Simvastatin Down	4/145	0.538075	0.695046	0	0	1.04247	0.646079	COL1A1;RRM2;TPM2;DTL
GW9508 Up	4/145	0.538075	0.695046	0	0	1.04247	0.646079	ANXA1;ARHGEF40;AGPAT1;DCTPP1
Ivabradine Up	4/145	0.538075	0.695046	0	0	1.04247	0.646079	GM2A;SLC11A2;KCTD12;NOL3
IWR-1 Down	4/145	0.538075	0.695046	0	0	1.04247	0.646079	ORC6;PGPEP1;MYL9;FOXP1
LP-533401 Up	4/145	0.538075	0.695046	0	0	1.04247	0.646079	CHAF1A;GPRC5A;ATG101;B2M
Stiripentol Down	4/145	0.538075	0.695046	0	0	1.04247	0.646079	IFIH1;IL6ST;OSMR;FOXP1
Calcipotriol Down	4/145	0.538075	0.695046	0	0	1.04247	0.646079	COL1A2;FHL1;CRIP2;CBR3
Ibrutinib2 Down	4/145	0.538075	0.695046	0	0	1.04247	0.646079	JUN;COL12A1;AMPD3;B2M
SB-674042 Up	4/145	0.538075	0.695046	0	0	1.04247	0.646079	LRP1;LMO4;BSG;FN1
D-3263 Down	4/145	0.538075	0.695046	0	0	1.04247	0.646079	LGALS3;TPM1;GLRX;IFIT1
SCH 530348 Down	4/146	0.543511	0.695046	0	0	1.03508	0.631092	JUN;RRM2;CDCA8;PHLDA3
Ticagrelor Down	4/146	0.543511	0.695046	0	0	1.03508	0.631092	GTF2A1;CERS5;VCAN;PPP1R12B
LUBIPROSTONE Up	4/146	0.543511	0.695046	0	0	1.03508	0.631092	HELLS;TTK;POLR3H;KCTD12
2,4-Dichlorophenol Up	4/146	0.543511	0.695046	0	0	1.03508	0.631092	GTF2A1;JUN;ABHD17B;TPM1
BMS 303141 Up	4/146	0.543511	0.695046	0	0	1.03508	0.631092	MYL9;NES;ADAT2;TTC39B
APD668 Down	4/146	0.543511	0.695046	0	0	1.03508	0.631092	TMEM59;TIMP2;PCBD2;NOL3
MI-3 Up	4/146	0.543511	0.695046	0	0	1.03508	0.631092	CEBPB;SLC11A2;FN1;MICAL2
TAK-875 Down	4/146	0.543511	0.695046	0	0	1.03508	0.631092	NPEPL1;FN1;DSTN;ADAT2
Parecoxib Down	4/146	0.543511	0.695046	0	0	1.03508	0.631092	TPM1;FN1;PGPEP1;DNPH1
HY-50713 Up	4/146	0.543511	0.695046	0	0	1.03508	0.631092	JUN;MEPCE;PLAUR;POLR3H
Glycyrrhizic Acid Down	4/146	0.543511	0.695046	0	0	1.03508	0.631092	FN1;LMOD1;GLRX;IFIT1
3-Benzyloxyaniline Down	4/146	0.543511	0.695046	0	0	1.03508	0.631092	GTF2A1;ABHD17B;PGPEP1;ANTXR1
Glufosinate Down	4/146	0.543511	0.695046	0	0	1.03508	0.631092	MED31;FHL1;IFIT1;PFN2
Org25543 Up	4/146	0.543511	0.695046	0	0	1.03508	0.631092	NQO1;PPP1R12B;NUDT14;NES
AC-7954 Down	4/146	0.543511	0.695046	0	0	1.03508	0.631092	TGFB1I1;TPM1;NOL3;NDRG1
JTE 013 Up	4/146	0.543511	0.695046	0	0	1.03508	0.631092	JUN;ABHD17B;PRRX2;ABAT
Dipyridamole Up	4/146	0.543511	0.695046	0	0	1.03508	0.631092	FOXC1;PLAUR;VPS37C;B2M
Rotigotine Up	4/146	0.543511	0.695046	0	0	1.03508	0.631092	FOXC1;FTH1;TPM1;IL6ST
CAL-101 Down	4/146	0.543511	0.695046	0	0	1.03508	0.631092	NRP1;CEBPB;FN1;SLC7A1
Quetiapine Up	4/146	0.543511	0.695046	0	0	1.03508	0.631092	CYB5A;TMEM59;COL5A1;LMO4
Mubritinib Down	4/146	0.543511	0.695046	0	0	1.03508	0.631092	TPM2;SSNA1;TPM1;NUDT14
L-Mimosine Up	4/146	0.543511	0.695046	0	0	1.03508	0.631092	TPST2;TPM2;FN1;DCTPP1
Nisoldipine Up	4/146	0.543511	0.695046	0	0	1.03508	0.631092	TMEM59;LMO4;AGA;CRLF1
SPB06189 Down	4/146	0.543511	0.695046	0	0	1.03508	0.631092	CMSS1;GOLIM4;MED19;LGMN
D399-0002 Up	4/146	0.543511	0.695046	0	0	1.03508	0.631092	PON3;CYB5A;SESTD1;PPP1R12B
ZINC2093649 Up	4/146	0.543511	0.695046	0	0	1.03508	0.631092	CYB5A;PTPN21;PGPEP1;SH3D19
STL304557 Up	4/146	0.543511	0.695046	0	0	1.03508	0.631092	CD81;GUK1;ISG15;CRIP1
PF-04620110 Down	4/146	0.543511	0.695046	0	0	1.03508	0.631092	FN1;ABAT;KCTD12;CBR3
Mifepristone Down	4/146	0.543511	0.695046	0	0	1.03508	0.631092	JUN;GEMIN2;NF1;GNG12
Bombesin Up	4/146	0.543511	0.695046	0	0	1.03508	0.631092	JUN;TPM1;SLC7A1;PFN2
Tazarotene2 Down	4/146	0.543511	0.695046	0	0	1.03508	0.631092	FN1;ANXA6;EPDR1;LMO7
Palonosetron Up	4/146	0.543511	0.695046	0	0	1.03508	0.631092	MAP1A;VPS37C;ADAR;PHLDA3
Odanacatib Up	4/146	0.543511	0.695046	0	0	1.03508	0.631092	FTH1;TPM2;BSG;B2M
LY2365109 Up	4/146	0.543511	0.695046	0	0	1.03508	0.631092	DNPEP;RRM2;TTK;HAUS1
Gefitinib Down	4/146	0.543511	0.695046	0	0	1.03508	0.631092	MED31;CLTB;B2M;LGMN
BCX 1470 Down	4/146	0.543511	0.695046	0	0	1.03508	0.631092	PRRX2;ANXA6;GLG1;LGMN
Pamidronic Acid Up	4/146	0.543511	0.695046	0	0	1.03508	0.631092	MMP14;MICAL2;TBC1D2B;NOL3
Cloprostenol Down	4/146	0.543511	0.695046	0	0	1.03508	0.631092	FTH1;IGF1R;CBR3;TTC39B
Alfuzosin Down	4/146	0.543511	0.695046	0	0	1.03508	0.631092	TEX30;PLAUR;ABAT;RAD9A
CJ-42794 Down	4/146	0.543511	0.695046	0	0	1.03508	0.631092	COL2A1;EPDR1;ANK3;ITM2C
Rucinol Up	4/146	0.543511	0.695046	0	0	1.03508	0.631092	COL2A1;CHSY1;EOGT;TIMP2
Rucinol Down	4/146	0.543511	0.695046	0	0	1.03508	0.631092	TPST2;NPEPL1;FKBP7;ANTXR1
Bosentan Down	4/146	0.543511	0.695046	0	0	1.03508	0.631092	TPST2;COL1A2;TPM1;FN1
5-R-Rivaroxaban Up	4/146	0.543511	0.695046	0	0	1.03508	0.631092	ELOF1;LMO4;SESTD1;PLAUR
Rupatadine Down	4/146	0.543511	0.695046	0	0	1.03508	0.631092	TMEM59;FOXC1;ABAT;GLG1
HA130 Up	4/146	0.543511	0.695046	0	0	1.03508	0.631092	ABHD17B;FN1;SORBS3;EPHB3
IC-87114 Up	4/146	0.543511	0.695046	0	0	1.03508	0.631092	GTF2A1;TPM2;NES;DCTPP1
Rolapitant Down	4/146	0.543511	0.695046	0	0	1.03508	0.631092	CD81;SSNA1;GPC1;POLR3H
AZD-5438 Down	4/146	0.543511	0.695046	0	0	1.03508	0.631092	RPS19BP1;APPBP2;DDX56;FAT1
Rucaparib Up	4/146	0.543511	0.695046	0	0	1.03508	0.631092	ISYNA1;CDCA8;FAS;GLRX
Radicicol Down	4/146	0.543511	0.695046	0	0	1.03508	0.631092	RRM2;CDCA8;JAK2;DTL
D-3263 Up	4/146	0.543511	0.695046	0	0	1.03508	0.631092	CYB5A;P2RX4;FN1;ANXA6
UK 356618 Down	4/147	0.548914	0.695046	0	0	1.02779	0.616481	TOR3A;RRM2;NF1;ADAT2
BX 471 Down	4/147	0.548914	0.695046	0	0	1.02779	0.616481	CRIP2;NOL3;NES;PHLDA3
Ingenol-3-angelate Down	4/147	0.548914	0.695046	0	0	1.02779	0.616481	GPC1;ARHGDIB;KCTD12;ANTXR1
a-Naphthoflavone Up	4/147	0.548914	0.695046	0	0	1.02779	0.616481	TPST2;DTX3L;PRRX2;TTC39B
Avosentan Down	4/147	0.548914	0.695046	0	0	1.02779	0.616481	RASSF1;FN1;FSTL1;LGMN
AA92593 Up	4/147	0.548914	0.695046	0	0	1.02779	0.616481	TUBB2A;FHL1;DSTN;PTPRK
VPC23019 Down	4/147	0.548914	0.695046	0	0	1.02779	0.616481	ACP6;PDLIM5;PFN2;HAUS1
A-317491 Up	4/147	0.548914	0.695046	0	0	1.02779	0.616481	NQO1;VCAN;PGPEP1;ANTXR1
CBIO Up	4/147	0.548914	0.695046	0	0	1.02779	0.616481	DNPEP;TPM1;ABAT;PPP1R12B
Thymidine Up	4/147	0.548914	0.695046	0	0	1.02779	0.616481	TPM2;MYADM;KIF21A;NES
(S)-(-)-Pindolol Up	4/147	0.548914	0.695046	0	0	1.02779	0.616481	SLC11A2;OSMR;NOL3;PTGS1
Cilostamide Up	4/147	0.548914	0.695046	0	0	1.02779	0.616481	LGALS3;KCTD12;AGPAT1;ITM2B
CGS 35066 Up	4/147	0.548914	0.695046	0	0	1.02779	0.616481	LMO4;ECE1;IL6ST;TTC39B
TCS PIM-1 1 Up	4/147	0.548914	0.695046	0	0	1.02779	0.616481	TPST2;COL1A1;JUN;SSNA1
Terazosin Up	4/147	0.548914	0.695046	0	0	1.02779	0.616481	BAG3;ADI1;SESTD1;NES
(Z)-Pugnac Up	4/147	0.548914	0.695046	0	0	1.02779	0.616481	IFIH1;CDA;ELOF1;NDRG1
MK 886 Down	4/147	0.548914	0.695046	0	0	1.02779	0.616481	MPP2;ELOF1;SESTD1;GLG1
WAY 170523 Down	4/147	0.548914	0.695046	0	0	1.02779	0.616481	TOR3A;GTF2A1;TPM2;KCTD12
4mu8C Down	4/147	0.548914	0.695046	0	0	1.02779	0.616481	TGFBR3;CTSL;PLAUR;PHLDA3
Olvance Up	4/147	0.548914	0.695046	0	0	1.02779	0.616481	LYRM4;TPM2;CDCA8;NAF1
Acitretin Down	4/147	0.548914	0.695046	0	0	1.02779	0.616481	IFRD1;TPM1;CRIP1;FSTL1
Levosimendan Down	4/147	0.548914	0.695046	0	0	1.02779	0.616481	CMC2;ANXA6;ANK3;TTC39B
STK832240 Up	4/147	0.548914	0.695046	0	0	1.02779	0.616481	ATG101;MYADM;PDLIM5;B2M
EWP-815 Down	4/147	0.548914	0.695046	0	0	1.02779	0.616481	TGFBR3;LRP1;B2M;FSTL1
Volasertib Down	4/147	0.548914	0.695046	0	0	1.02779	0.616481	HELLS;DDX56;PLAUR;FAM3C
Moxonidine Up	4/147	0.548914	0.695046	0	0	1.02779	0.616481	IFIH1;NRP1;FKBP7;IFIT1
LY2090314 Up	4/147	0.548914	0.695046	0	0	1.02779	0.616481	JUN;DPP7;GM2A;TMED3
JQ-1 Down	4/147	0.548914	0.695046	0	0	1.02779	0.616481	MMP14;IFIT1;ARHGEF40;DUSP9
RG2833 Down	4/147	0.548914	0.695046	0	0	1.02779	0.616481	MMP14;VCAN;DTX3L;SORBS3
Sumatriptan Up	4/147	0.548914	0.695046	0	0	1.02779	0.616481	GTF2A1;CYB5A;DTL;TRMT61A
Retigabine Up	4/147	0.548914	0.695046	0	0	1.02779	0.616481	SSNA1;TPM1;DCTPP1;HAUS1
Duvelisib Down	4/147	0.548914	0.695046	0	0	1.02779	0.616481	NRP1;KANK1;CD81;DNPH1
2,2-Biquinoline Up	4/147	0.548914	0.695046	0	0	1.02779	0.616481	IFRD1;MICAL2;PGPEP1;DNPH1
Tolimidone Down	4/147	0.548914	0.695046	0	0	1.02779	0.616481	FARP2;CYB5A;TGFB1I1;B2M
Dinoprost Down	4/147	0.548914	0.695046	0	0	1.02779	0.616481	TGFB1I1;MED19;SLC7A1;HAUS1
Cetirizine Down	4/147	0.548914	0.695046	0	0	1.02779	0.616481	IFIH1;P2RX4;TPM1;APBA3
ZM 336372 Up	4/147	0.548914	0.695046	0	0	1.02779	0.616481	CYB5A;JUN;CD81;TIMP2
Carvedilol Down	4/147	0.548914	0.695046	0	0	1.02779	0.616481	HEBP1;NT5C;JUN;DAP
PNU-120596 Up	4/147	0.548914	0.695046	0	0	1.02779	0.616481	NQO2;FKBP7;TTK;IFIT1
Pyrimethamine Up	4/147	0.548914	0.695046	0	0	1.02779	0.616481	TPM1;NF1;PLAUR;B2M
Pyrimethamine Down	4/147	0.548914	0.695046	0	0	1.02779	0.616481	CDA;ANXA6;TIMP2;GLRX
Cysmethynil Up	4/148	0.554282	0.695046	0	0	1.0206	0.602234	HELLS;ABHD17B;TIMP2;TTK
NVP-BEP800 Down	4/148	0.554282	0.695046	0	0	1.0206	0.602234	HELLS;ORC6;RRM2;DTL
LCL161 Up	4/148	0.554282	0.695046	0	0	1.0206	0.602234	CEBPB;BAG3;TPM1;ARHGEF40
FR 180204 Down	4/148	0.554282	0.695046	0	0	1.0206	0.602234	NRP1;JUN;PLAUR;MICAL2
Fluorescein Up	4/148	0.554282	0.695046	0	0	1.0206	0.602234	TPM2;SSNA1;NOL3;DCK
HJC0350 Up	4/148	0.554282	0.695046	0	0	1.0206	0.602234	DTX3L;EMB;PGPEP1;ANTXR1
Alectinib Down	4/148	0.554282	0.695046	0	0	1.0206	0.602234	TEX30;SSNA1;ARHGEF40;JAK2
AMG 487 Up	4/148	0.554282	0.695046	0	0	1.0206	0.602234	JUN;DAP;COL5A1;TPM1
STK841699 Down	4/148	0.554282	0.695046	0	0	1.0206	0.602234	DTX3L;CALD1;OSMR;B2M
Pepstatin A Up	4/148	0.554282	0.695046	0	0	1.0206	0.602234	CMSS1;GUK1;ARHGDIB;PPIF
Ramelteon Down	4/148	0.554282	0.695046	0	0	1.0206	0.602234	TPST2;IFIH1;JUN;SLC11A2
AQ-390/43364023 Down	4/148	0.554282	0.695046	0	0	1.0206	0.602234	ABHD17B;PCBD2;IL6ST;B2M
Flavopiridol Down	4/148	0.554282	0.695046	0	0	1.0206	0.602234	RPS19BP1;PDCD11;DDX56;FAT1
Neurokinin A Up	4/148	0.554282	0.695046	0	0	1.0206	0.602234	LRP1;FAS;ARHGEF40;RAD9A
Lixivaptan Down	4/148	0.554282	0.695046	0	0	1.0206	0.602234	SSNA1;GLRX;SORBS1;OSMR
Macitentan Up	4/148	0.554282	0.695046	0	0	1.0206	0.602234	PDLIM2;TPM1;IL6ST;PFN2
MK-3207 Down	4/148	0.554282	0.695046	0	0	1.0206	0.602234	P2RX4;CALD1;EMB;AGA
CH5132799 Down	4/148	0.554282	0.695046	0	0	1.0206	0.602234	JUN;RRM2;TTK;NES
ML365 Up	4/149	0.559617	0.695234	0	0	1.0135	0.588342	KANK1;ELF2;FN1;ADAT2
Dapagliflozin Down	4/149	0.559617	0.695234	0	0	1.0135	0.588342	COL1A2;IFRD1;VPS37C;EPHB3
Glufosinate Up	4/149	0.559617	0.695234	0	0	1.0135	0.588342	NPEPL1;PARP9;APBA3;HAUS1
A 803467 Down	4/149	0.559617	0.695234	0	0	1.0135	0.588342	IFIH1;IDH1;APBA3;ITM2B
NMS-873 Down	4/149	0.559617	0.695234	0	0	1.0135	0.588342	CYB5A;FOXC1;RRM2;CDCA8
AGI-6780 Down	4/149	0.559617	0.695234	0	0	1.0135	0.588342	SESTD1;TGFB1I1;FN1;TAPBP
Roxatidine Down	4/149	0.559617	0.695234	0	0	1.0135	0.588342	NQO2;FN1;GLRX;AGPAT1
Sumatriptan Down	4/149	0.559617	0.695234	0	0	1.0135	0.588342	CTSL;IFRD1;FSTL1;PHLDA3
PD 123319 Up	4/149	0.559617	0.695234	0	0	1.0135	0.588342	ATAD5;JAK2;B2M;DNPH1
GW311616 Up	4/149	0.559617	0.695234	0	0	1.0135	0.588342	FARP2;COL14A1;FN1;NAF1
BCX 1470 Up	4/149	0.559617	0.695234	0	0	1.0135	0.588342	FARP2;TGFB1I1;MAP1A;FN1
WAY 316606 Down	4/149	0.559617	0.695234	0	0	1.0135	0.588342	H6PD;CALD1;COL14A1;SYNPO
Nexturastat A Down	4/149	0.559617	0.695234	0	0	1.0135	0.588342	MMP14;VCAN;CALD1;PLAUR
Dabigatran Down	4/150	0.564917	0.700819	0	0	1.00651	0.574794	JUN;RRM2;CRIP2;CRLF1
Ibrutinib1 Up	4/150	0.564917	0.700819	0	0	1.00651	0.574794	NQO1;FTH1;IFRD1;PLAUR
Pirenzepine Up	7/285	0.633309	0.785105	0	0	0.924	0.42208	PRRX2;DSTN;KCTD12;PTPRK;IL6ST;B2M;USP18
Thiamet G Down	3/138	0.712037	0.827123	0	0	0.815307	0.276899	TMEM59;JUN;COL14A1
Ro 48-8071 Down	3/140	0.721123	0.827123	0	0	0.803321	0.262643	PDLIM1;RCN1;BAG3
JNJ-38877605 Up	3/140	0.721123	0.827123	0	0	0.803321	0.262643	NQO2;GPRC5A;B2M
STK416816 Up	3/141	0.725582	0.827123	0	0	0.797459	0.25581	ARHGDIB;EPDR1;OSMR
Guanfacine Down	3/141	0.725582	0.827123	0	0	0.797459	0.25581	PLAUR;PHLDA3;HAUS1
ABT-737 Down	3/141	0.725582	0.827123	0	0	0.797459	0.25581	CHID1;FN1;PHLDA3
STX-0119 Down	3/142	0.729985	0.827123	0	0	0.791681	0.249167	GTF2A1;BAG3;COL14A1
Tamibarotene Up	3/142	0.729985	0.827123	0	0	0.791681	0.249167	FOXC1;TPM1;IL6ST
STK410283 Down	3/142	0.729985	0.827123	0	0	0.791681	0.249167	PRIM2;RRM2;FAM3C
Ethynyl Estradiol Up	3/142	0.729985	0.827123	0	0	0.791681	0.249167	FKBP7;KCTD12;PHLDA3
SB-674042 Down	3/142	0.729985	0.827123	0	0	0.791681	0.249167	COL14A1;ACP6;NF1
AK 7 Down	3/143	0.734332	0.827123	0	0	0.785985	0.242708	EPDR1;FAM3C;PHLDA3
SP2509 Down	3/143	0.734332	0.827123	0	0	0.785985	0.242708	FTH1;GLG1;PLCD1
Dipyridamole Down	3/143	0.734332	0.827123	0	0	0.785985	0.242708	MPP2;RRAS;EPHB3
Pitolisant Up	3/143	0.734332	0.827123	0	0	0.785985	0.242708	SESTD1;TPM2;TPM1
10074-G5 Up	3/143	0.734332	0.827123	0	0	0.785985	0.242708	NRP1;MICAL2;IGF1R
KM03430 Down	3/143	0.734332	0.827123	0	0	0.785985	0.242708	ABHD17B;NES;TAPBP
Tanomastat Down	3/143	0.734332	0.827123	0	0	0.785985	0.242708	GPRC5A;ARHGDIB;FN1
Finasteride Down	3/143	0.734332	0.827123	0	0	0.785985	0.242708	LMOD1;ANXA6;SH3D19
Sulforaphane Down	3/143	0.734332	0.827123	0	0	0.785985	0.242708	TPM1;B2M;XDH
Topiramate Down	3/143	0.734332	0.827123	0	0	0.785985	0.242708	COL14A1;MED31;B2M
Tezacaftor Up	3/143	0.734332	0.827123	0	0	0.785985	0.242708	GPRC5A;PCBD2;S100A10
Sitaxsentan Down	3/143	0.734332	0.827123	0	0	0.785985	0.242708	P2RX4;COL5A1;FN1
Pamoic Acid Down	3/143	0.734332	0.827123	0	0	0.785985	0.242708	NRP1;CERS5;TTC39B
Lasmiditan Down	3/143	0.734332	0.827123	0	0	0.785985	0.242708	ATG101;TAPBP;ADAT2
EPZ004777 Up	3/143	0.734332	0.827123	0	0	0.785985	0.242708	GTF2A1;JAK2;OSMR
Cetrorelix Down	3/144	0.738624	0.827123	0	0	0.780371	0.236426	COL14A1;ANTXR1;MYL9
Actonel Up	3/144	0.738624	0.827123	0	0	0.780371	0.236426	JUN;SLC11A2;ADAT2
p-Tolylboronic Acid Down	3/144	0.738624	0.827123	0	0	0.780371	0.236426	KIF21A;PTPRK;THBS1
SB 218795 Up	3/144	0.738624	0.827123	0	0	0.780371	0.236426	MGST1;PLAUR;EPHB3
Tideglusib Down	3/144	0.738624	0.827123	0	0	0.780371	0.236426	TPM1;PLAUR;IRF9
TGX-221 Down	3/144	0.738624	0.827123	0	0	0.780371	0.236426	DAP;ELF2;ECE1
Tipiracil Up	3/144	0.738624	0.827123	0	0	0.780371	0.236426	DAP;ARHGDIB;IFIT1
GK01981 Down	3/144	0.738624	0.827123	0	0	0.780371	0.236426	RASSF1;DNPEP;B2M
STK746869 Up	3/144	0.738624	0.827123	0	0	0.780371	0.236426	SSNA1;POLR3H;CBR3
Dichlorisone Up	3/144	0.738624	0.827123	0	0	0.780371	0.236426	FN1;DCTPP1;SH3D19
NBTGR Up	3/144	0.738624	0.827123	0	0	0.780371	0.236426	RRAS;GLRX;PLEKHO2
PF429242 Down	3/144	0.738624	0.827123	0	0	0.780371	0.236426	EHD2;GPRC5A;DDA1
UAMC00039 Down	3/144	0.738624	0.827123	0	0	0.780371	0.236426	NRP1;JUN;LMOD1
S107 Up	3/144	0.738624	0.827123	0	0	0.780371	0.236426	MED31;APBA3;CRIP1
Pramipexole Down	3/144	0.738624	0.827123	0	0	0.780371	0.236426	LRP1;CTSL;FN1
A 922500 Up	3/144	0.738624	0.827123	0	0	0.780371	0.236426	COL1A1;JUN;CPE
Epristeride Down	3/144	0.738624	0.827123	0	0	0.780371	0.236426	TPM1;POLR3H;B2M
Dimethylfraxetin Up	3/144	0.738624	0.827123	0	0	0.780371	0.236426	PRIM2;GPX8;S100A10
Telmisartan Up	3/144	0.738624	0.827123	0	0	0.780371	0.236426	MED19;KCTD12;SH3D19
UNC 0631 Down	3/144	0.738624	0.827123	0	0	0.780371	0.236426	NQO2;TPM2;GLRX
SR 142948 Up	3/145	0.742861	0.827123	0	0	0.774835	0.230317	CDA;HSPB1;PGLS
ML-265 Up	3/145	0.742861	0.827123	0	0	0.774835	0.230317	NRP1;NQO1;PRRX2
Balicatib Down	3/145	0.742861	0.827123	0	0	0.774835	0.230317	LMO4;MICAL2;CBR3
EIPA Down	3/145	0.742861	0.827123	0	0	0.774835	0.230317	TMED3;PTPN21;BCS1L
SR 3335 Up	3/145	0.742861	0.827123	0	0	0.774835	0.230317	TTK;POLR3H;RSL24D1
AS 1517499 Down	3/145	0.742861	0.827123	0	0	0.774835	0.230317	CEBPB;FAT1;PTPRK
Chlorsulfuron Up	3/145	0.742861	0.827123	0	0	0.774835	0.230317	TPM1;CLTB;DCTPP1
FIPI HCl Down	3/145	0.742861	0.827123	0	0	0.774835	0.230317	TOR3A;RASSF1;IFRD1
CP 94253 Up	3/145	0.742861	0.827123	0	0	0.774835	0.230317	NQO2;GM2A;B2M
NFPS Down	3/145	0.742861	0.827123	0	0	0.774835	0.230317	CYB5A;TGFB1I1;B2M
IU1 Up	3/145	0.742861	0.827123	0	0	0.774835	0.230317	IFIH1;SSNA1;B2M
Isotretinoin Up	3/145	0.742861	0.827123	0	0	0.774835	0.230317	NQO1;KCTD12;ARHGEF40
STK235555 Down	3/145	0.742861	0.827123	0	0	0.774835	0.230317	FTH1;PLCD1;S100A10
STK155799 Up	3/145	0.742861	0.827123	0	0	0.774835	0.230317	LRP1;B2M;EPHB3
Dorzolamide Down	3/145	0.742861	0.827123	0	0	0.774835	0.230317	CD81;FN1;GLRX
CHEMBL1436068 Down	3/145	0.742861	0.827123	0	0	0.774835	0.230317	LYRM4;TPM1;FSTL1
CHEMBL1597046 Down	3/145	0.742861	0.827123	0	0	0.774835	0.230317	FN1;MYL9;CBR3
AZ505 Down	3/145	0.742861	0.827123	0	0	0.774835	0.230317	CMSS1;TRMT61A;PHLDA3
Benzo(a)pyrene Up	3/145	0.742861	0.827123	0	0	0.774835	0.230317	COL14A1;NUDT14;PHLDA3
L-NIL Up	3/145	0.742861	0.827123	0	0	0.774835	0.230317	BAG3;PRRX2;KCTD12
Dapiprazole Up	3/145	0.742861	0.827123	0	0	0.774835	0.230317	FN1;GLRX;HAUS1
4-Methoxybenzoic Acid Up	3/145	0.742861	0.827123	0	0	0.774835	0.230317	GTF2A1;FKBP7;DDA1
T3 Up	3/145	0.742861	0.827123	0	0	0.774835	0.230317	GEMIN2;SSNA1;NUDT14
Icatibant Up	3/145	0.742861	0.827123	0	0	0.774835	0.230317	TMEM59;GPRC5A;FN1
Perhexiline Down	3/145	0.742861	0.827123	0	0	0.774835	0.230317	RRM2;CALD1;SSNA1
EPZ-6438 Down	3/145	0.742861	0.827123	0	0	0.774835	0.230317	PLAUR;NUDT14;CBR3
PX-12 Down	3/145	0.742861	0.827123	0	0	0.774835	0.230317	B2M;SNX8;GLG1
PDK1-In Down	3/145	0.742861	0.827123	0	0	0.774835	0.230317	CPNE8;CEBPB;B2M
Montelukast Down	3/145	0.742861	0.827123	0	0	0.774835	0.230317	PRUNE2;NF1;ARHGEF40
VTP-27999 Up	3/145	0.742861	0.827123	0	0	0.774835	0.230317	P2RX4;LMO4;ARHGEF40
GW842166X Up	3/145	0.742861	0.827123	0	0	0.774835	0.230317	PTPN21;NAF1;PLCD1
Fumitremorgin C Down	3/145	0.742861	0.827123	0	0	0.774835	0.230317	BSG;IFRD1;PTPN21
Bergenin Up	3/145	0.742861	0.827123	0	0	0.774835	0.230317	CD81;PRRX2;GPX8
Acenaphthoquinone Down	3/145	0.742861	0.827123	0	0	0.774835	0.230317	PBXIP1;ITM2C;RAD9A
Vicriviroc Up	3/145	0.742861	0.827123	0	0	0.774835	0.230317	NSMCE4A;ADI1;BSG
Iloprost Up	3/145	0.742861	0.827123	0	0	0.774835	0.230317	CPT1A;EZR;DCTPP1
JNJ-38877605 Down	3/145	0.742861	0.827123	0	0	0.774835	0.230317	IFRD1;CLTB;IRF9
FK866 Up	3/145	0.742861	0.827123	0	0	0.774835	0.230317	TPST2;JUN;PLAUR
FK866 Down	3/145	0.742861	0.827123	0	0	0.774835	0.230317	CPE;MYL9;ITM2B
PF-8380 Up	3/146	0.747043	0.827123	0	0	0.769377	0.224375	DAP;LMOD1;VPS37C
GSK2578215 Up	3/146	0.747043	0.827123	0	0	0.769377	0.224375	CYB5A;ACSL4;POLR3H
AT 406 Up	3/146	0.747043	0.827123	0	0	0.769377	0.224375	IFIH1;LRP1;APBA3
Ralfinamide Down	3/146	0.747043	0.827123	0	0	0.769377	0.224375	COL14A1;LMOD1;RSL24D1
CHEMBL217125 Up	3/146	0.747043	0.827123	0	0	0.769377	0.224375	FOXC1;ELOF1;COL14A1
(RS)-PPG Up	3/146	0.747043	0.827123	0	0	0.769377	0.224375	CYB5A;GLO1;PGLS
XEN 103 Down	3/146	0.747043	0.827123	0	0	0.769377	0.224375	LGALS3;TPM2;TPM1
GW 3965 Up	3/146	0.747043	0.827123	0	0	0.769377	0.224375	CPT1A;CEBPB;IFRD1
Anagrelide Up	3/146	0.747043	0.827123	0	0	0.769377	0.224375	POLR3H;PLCD1;EPHB3
ZM 241385 Up	3/146	0.747043	0.827123	0	0	0.769377	0.224375	PRRX2;PLAUR;IFIT1
Anastrozole Down	3/146	0.747043	0.827123	0	0	0.769377	0.224375	NRP1;FHL1;ITM2B
PF-3758309 Down	3/146	0.747043	0.827123	0	0	0.769377	0.224375	CEBPB;FHL1;NES
A 1120 Up	3/146	0.747043	0.827123	0	0	0.769377	0.224375	TPM2;OSMR;APBA3
Esmolol Up	3/146	0.747043	0.827123	0	0	0.769377	0.224375	CD81;PGLS;B2M
Acamprosate Up	3/146	0.747043	0.827123	0	0	0.769377	0.224375	HELLS;CDCA8;PPP1R12B
LY 344864 Up	3/146	0.747043	0.827123	0	0	0.769377	0.224375	CDCA8;TTK;NOL3
Tideglusib Up	3/146	0.747043	0.827123	0	0	0.769377	0.224375	COL14A1;FN1;PCBD2
Fedratinib Down	3/146	0.747043	0.827123	0	0	0.769377	0.224375	HELLS;RRM2;DTL
D-(+)-Glucose Down	3/146	0.747043	0.827123	0	0	0.769377	0.224375	ACP6;TPM1;NF1
TMP269 Down	3/146	0.747043	0.827123	0	0	0.769377	0.224375	JUN;CPE;NUDT14
Sulfanilamide Up	3/146	0.747043	0.827123	0	0	0.769377	0.224375	RASSF1;NES;ADAT2
Dicumarol Up	3/146	0.747043	0.827123	0	0	0.769377	0.224375	DAP;CLTB;LMO7
STK235555 Up	3/146	0.747043	0.827123	0	0	0.769377	0.224375	PON3;BSG;TIMP2
Z32036776 Down	3/146	0.747043	0.827123	0	0	0.769377	0.224375	IFIT1;ARHGEF40;PDLIM5
STK410281 Down	3/146	0.747043	0.827123	0	0	0.769377	0.224375	DAP;AGA;ARHGEF40
L-NIL Down	3/146	0.747043	0.827123	0	0	0.769377	0.224375	GUK1;FN1;CRIP2
Eplerenone Up	3/146	0.747043	0.827123	0	0	0.769377	0.224375	CD81;COL14A1;B2M
BMS-911543 Up	3/146	0.747043	0.827123	0	0	0.769377	0.224375	FOXC1;IFIT1;IGF1R
MN-64 Down	3/146	0.747043	0.827123	0	0	0.769377	0.224375	ORC6;LYRM4;HAUS1
VU0152100 Up	3/146	0.747043	0.827123	0	0	0.769377	0.224375	GTF2A1;BSG;HAUS1
Midostaurin Down	3/146	0.747043	0.827123	0	0	0.769377	0.224375	TGFBR3;TOR3A;NES
Methazolamide Up	3/146	0.747043	0.827123	0	0	0.769377	0.224375	CYB5A;TPM2;SORBS1
JZL 184 Down	3/146	0.747043	0.827123	0	0	0.769377	0.224375	NRP1;TMED3;ARHGEF40
Bestatin Down	3/146	0.747043	0.827123	0	0	0.769377	0.224375	TGFBR3;RPS19BP1;LMO4
Fluconazole Up	3/146	0.747043	0.827123	0	0	0.769377	0.224375	TUBB3;LMO4;NOL3
NIBR189 Up	3/146	0.747043	0.827123	0	0	0.769377	0.224375	DAP;APBA3;DCTPP1
Boc-4mesyloxypiperidine Down	3/146	0.747043	0.827123	0	0	0.769377	0.224375	DAP;FHL1;NF1
Fluoxymesterone Up	3/146	0.747043	0.827123	0	0	0.769377	0.224375	NRP1;GTF2A1;B2M
Pamoic Acid Up	3/146	0.747043	0.827123	0	0	0.769377	0.224375	BSG;REXO2;B2M
4,4-Dimethoxybenzil Down	3/146	0.747043	0.827123	0	0	0.769377	0.224375	NRP1;JUN;COL14A1
6-Aminochrysene Down	3/146	0.747043	0.827123	0	0	0.769377	0.224375	TIMP2;IL6ST;TRMT61A
Guanethidine Down	3/146	0.747043	0.827123	0	0	0.769377	0.224375	GTF2A1;CD81;TIMP2
MK2206 Down	3/146	0.747043	0.827123	0	0	0.769377	0.224375	HELLS;RRM2;NES
PF-431396 Down	3/146	0.747043	0.827123	0	0	0.769377	0.224375	CEBPB;APPBP2;DDX56
Buspirone Up	3/146	0.747043	0.827123	0	0	0.769377	0.224375	TUBB3;RIPK2;MED31
Dronedarone Up	3/146	0.747043	0.827123	0	0	0.769377	0.224375	COL12A1;IFRD1;TMED3
PF-04418948 Up	3/147	0.751171	0.827123	0	0	0.763994	0.218596	SLC11A2;MED19;ARHGEF40
Fumagillin Down	3/147	0.751171	0.827123	0	0	0.763994	0.218596	TMEM59;JUN;IGF1R
Kb NB 142-70 Down	3/147	0.751171	0.827123	0	0	0.763994	0.218596	CEBPB;LMO4;TIMP2
XCT 790 Down	3/147	0.751171	0.827123	0	0	0.763994	0.218596	JUN;GLG1;PHLDA3
AM966 Down	3/147	0.751171	0.827123	0	0	0.763994	0.218596	GPRC5A;FN1;HSPB1
BMY 7378 Up	3/147	0.751171	0.827123	0	0	0.763994	0.218596	LMOD1;JAK2;NDRG1
Veliparib Up	3/147	0.751171	0.827123	0	0	0.763994	0.218596	DPP7;CCNT1;ARHGEF40
Tamibarotene Down	3/147	0.751171	0.827123	0	0	0.763994	0.218596	FTH1;PTPN21;SYNPO
Quizartinib Down	3/147	0.751171	0.827123	0	0	0.763994	0.218596	NRP1;EPDR1;SLC7A1
Aripiprazole Down	3/147	0.751171	0.827123	0	0	0.763994	0.218596	RRM2;LMOD1;APBA3
Sotrastaurin Up	3/147	0.751171	0.827123	0	0	0.763994	0.218596	RBP1;TMED3;PHLDA3
Torasemide Up	3/147	0.751171	0.827123	0	0	0.763994	0.218596	NRP1;PPP1R12B;DCTPP1
Racecadotril Up	3/147	0.751171	0.827123	0	0	0.763994	0.218596	TPM2;NUDT14;RSL24D1
Meloxicam Down	3/147	0.751171	0.827123	0	0	0.763994	0.218596	COL14A1;FN1;ITM2C
SCHEMBL5061501 Up	3/147	0.751171	0.827123	0	0	0.763994	0.218596	ATG101;DDX31;MED19
Dichlorphenamide Up	3/147	0.751171	0.827123	0	0	0.763994	0.218596	MPP2;ATG101;PLAUR
Erlotinib Down	3/147	0.751171	0.827123	0	0	0.763994	0.218596	TGFBR3;FKBP7;NES
CHEMBL1643306 Down	3/147	0.751171	0.827123	0	0	0.763994	0.218596	CDA;FTH1;GLRX
Olcegepant Up	3/147	0.751171	0.827123	0	0	0.763994	0.218596	IRGQ;FTH1;SH3D19
OTSSP167 Down	3/147	0.751171	0.827123	0	0	0.763994	0.218596	APPBP2;DDX56;FAT1
ISO-1 Down	3/147	0.751171	0.827123	0	0	0.763994	0.218596	CDA;IFIT1;ANTXR1
SD-208 Down	3/147	0.751171	0.827123	0	0	0.763994	0.218596	COL14A1;CPE;DDA1
Quiflapon Up	3/147	0.751171	0.827123	0	0	0.763994	0.218596	FN1;GLRX;DNPH1
MK-3207 Up	3/147	0.751171	0.827123	0	0	0.763994	0.218596	GTF2A1;PGLS;HAUS1
Thiothixene Down	3/147	0.751171	0.827123	0	0	0.763994	0.218596	JUN;RRM2;EPDR1
AZD 6482 Down	3/147	0.751171	0.827123	0	0	0.763994	0.218596	JUN;CEBPB;IFRD1
AZ20 Down	3/147	0.751171	0.827123	0	0	0.763994	0.218596	CPNE8;RRM2;IFRD1
Clorgiline Up	3/147	0.751171	0.827123	0	0	0.763994	0.218596	DTX3L;TTK;JAK2
Ozagrel Down	3/147	0.751171	0.827123	0	0	0.763994	0.218596	IFIH1;COL14A1;VPS13A
GSK343 Down	3/148	0.755244	0.827123	0	0	0.758686	0.212974	JUN;NUDT14;MYL9
a-Naphthoflavone Down	3/148	0.755244	0.827123	0	0	0.758686	0.212974	IFRD1;VPS37C;PCBD2
1,4-DHNA Up	3/148	0.755244	0.827123	0	0	0.758686	0.212974	JUN;LRP1;IFRD1
ZD 7288 Up	3/148	0.755244	0.827123	0	0	0.758686	0.212974	MMP14;ADI1;NDRG1
L-741 Up	3/148	0.755244	0.827123	0	0	0.758686	0.212974	SCARB1;NRP1;IDH1
GSK2334470 Down	3/148	0.755244	0.827123	0	0	0.758686	0.212974	CDCA8;TTK;NES
LY411575 Down	3/148	0.755244	0.827123	0	0	0.758686	0.212974	GTF2A1;JUN;RBP1
Tolvaptan Up	3/148	0.755244	0.827123	0	0	0.758686	0.212974	IFIH1;CD81;PTPN21
Pictilisib Down	3/148	0.755244	0.827123	0	0	0.758686	0.212974	RRM2;CDCA8;TTK
Acetazolamide Down	3/148	0.755244	0.827123	0	0	0.758686	0.212974	MGST1;EPDR1;B2M
Rosiglitazone Up	3/148	0.755244	0.827123	0	0	0.758686	0.212974	JUN;FN1;ACSL4
BML-277 Up	3/148	0.755244	0.827123	0	0	0.758686	0.212974	VCAN;IFRD1;NES
Dexrazoxane Up	3/148	0.755244	0.827123	0	0	0.758686	0.212974	COTL1;IGF1R;PHLDA3
Ethoxzolamide Down	3/148	0.755244	0.827123	0	0	0.758686	0.212974	TMEM59;LRP1;ANTXR1
Imiquimod Up	3/148	0.755244	0.827123	0	0	0.758686	0.212974	NAF1;B2M;DTL
PRX-08066 Down	3/148	0.755244	0.827123	0	0	0.758686	0.212974	JUN;RRM2;NES
Sapropterin Down	3/148	0.755244	0.827123	0	0	0.758686	0.212974	FARP1;COL14A1;SORBS1
AKR1C3-IN-1 Up	3/148	0.755244	0.827123	0	0	0.758686	0.212974	NRP1;B2M;SLC7A1
AKR1C3-IN-1 Down	3/148	0.755244	0.827123	0	0	0.758686	0.212974	CALD1;FN1;NDRG1
Ibrutinib1 Down	3/148	0.755244	0.827123	0	0	0.758686	0.212974	JUN;MMP14;COL12A1
WZ811 Up	3/148	0.755244	0.827123	0	0	0.758686	0.212974	IFIH1;JUN;SSNA1
MI-3 Down	3/149	0.759264	0.827123	0	0	0.753451	0.207505	TTK;IFIT1;B2M
Fenoldopam Up	3/149	0.759264	0.827123	0	0	0.753451	0.207505	ARHGDIB;IFIT1;B2M
Dasatinib Down	3/149	0.759264	0.827123	0	0	0.753451	0.207505	RRM2;CDCA8;MICAL2
Dicumarol Down	3/149	0.759264	0.827123	0	0	0.753451	0.207505	FN1;CRIP2;OSMR
Climbazole Up	3/149	0.759264	0.827123	0	0	0.753451	0.207505	POLR3H;KCTD12;IGF1R
Tivozanib Down	3/149	0.759264	0.827123	0	0	0.753451	0.207505	RRM2;CHSY1;IFRD1
Aprepitant Down	3/149	0.759264	0.827123	0	0	0.753451	0.207505	GPC1;NF1;SLC7A1
CHEMBL383736 Down	3/149	0.759264	0.827123	0	0	0.753451	0.207505	MYADM;FN1;EPHB3
T-00127 Down	3/149	0.759264	0.827123	0	0	0.753451	0.207505	FAM3C;MYL9;EPHB3
Saracatinib Down	3/149	0.759264	0.827123	0	0	0.753451	0.207505	RRM2;COL14A1;SLC7A1
GW4064 Up	3/149	0.759264	0.827123	0	0	0.753451	0.207505	ACSL4;RSL24D1;EPHB3
MK-6892 Up	3/149	0.759264	0.827123	0	0	0.753451	0.207505	GM2A;ATAD5;IL6ST
Ceritinib Down	3/149	0.759264	0.827123	0	0	0.753451	0.207505	FTH1;CDCA8;HAUS1
3,5-Dichlorosalicylic Acid Up	3/150	0.76323	0.829888	0	0	0.748286	0.202184	IFIH1;JUN;PARP9
LY 364947 Down	3/150	0.76323	0.829888	0	0	0.748286	0.202184	MMP14;ADI1;RAD9A
PF-543 Up	3/150	0.76323	0.829888	0	0	0.748286	0.202184	SCARB1;JAK2;NES
Pimavanserin Down	2/139	0.88644	0.933149	0	0	0.534533	0.0644334	COL1A1;FARP1
Olanzapine Up	2/141	0.891185	0.933149	0	0	0.526788	0.0606875	TPST2;SH3D19
Pinometostat Up	2/141	0.891185	0.933149	0	0	0.526788	0.0606875	TPM1;KCTD12
ML349 Down	2/141	0.891185	0.933149	0	0	0.526788	0.0606875	COL2A1;TPM1
Carbamazepine Up	2/142	0.893488	0.933149	0	0	0.522998	0.0589012	IFIT1;B2M
Abiraterone2 Up	2/142	0.893488	0.933149	0	0	0.522998	0.0589012	PRRX2;CPE
Atomoxetine Down	2/142	0.893488	0.933149	0	0	0.522998	0.0589012	MMP14;TIMP2
MF63 Up	2/143	0.895746	0.933149	0	0	0.519262	0.0571701	CTSL;PGPEP1
Anastrozole Up	2/143	0.895746	0.933149	0	0	0.519262	0.0571701	TPM1;NDRG1
UNC 0638 Down	2/143	0.895746	0.933149	0	0	0.519262	0.0571701	PRIM2;ADI1
Acetazolamide Up	2/143	0.895746	0.933149	0	0	0.519262	0.0571701	FN1;S100A10
Gliclazide Up	2/143	0.895746	0.933149	0	0	0.519262	0.0571701	ATAD5;LMO4
STK772817 Up	2/143	0.895746	0.933149	0	0	0.519262	0.0571701	NRP1;GTF2A1
RH00511 Up	2/143	0.895746	0.933149	0	0	0.519262	0.0571701	PON3;PLEKHO2
2,6-Dichlorophenethylamine Up	2/143	0.895746	0.933149	0	0	0.519262	0.0571701	MED19;PHLDA3
(S)-Zopiclone Up	2/143	0.895746	0.933149	0	0	0.519262	0.0571701	NQO1;HAUS1
Nifedipine Down	2/143	0.895746	0.933149	0	0	0.519262	0.0571701	ANXA1;ARHGEF40
Sitaxsentan Up	2/143	0.895746	0.933149	0	0	0.519262	0.0571701	PRRX2;POLR3H
Salmeterol Down	2/143	0.895746	0.933149	0	0	0.519262	0.0571701	RRM2;BCS1L
Tolimidone Up	2/143	0.895746	0.933149	0	0	0.519262	0.0571701	PLA2G4A;IL6ST
Rimonabant Down	2/143	0.895746	0.933149	0	0	0.519262	0.0571701	TMED3;XDH
Alvimopan Up	2/144	0.897959	0.933149	0	0	0.515578	0.0554924	COL2A1;NUDT14
Compound-1a Up	2/144	0.897959	0.933149	0	0	0.515578	0.0554924	FOXC1;PGPEP1
BW 723C86 Up	2/144	0.897959	0.933149	0	0	0.515578	0.0554924	FARP2;FN1
CB 13 Up	2/144	0.897959	0.933149	0	0	0.515578	0.0554924	MED31;FN1
SB 334867 Up	2/144	0.897959	0.933149	0	0	0.515578	0.0554924	FKBP7;EPHB3
Bicifadine Up	2/144	0.897959	0.933149	0	0	0.515578	0.0554924	JUN;TGFB1I1
Tranexamic Acid Up	2/144	0.897959	0.933149	0	0	0.515578	0.0554924	TPM2;FN1
D-(+)-Glucose Up	2/144	0.897959	0.933149	0	0	0.515578	0.0554924	ATAD5;CPE
LUF-5735 Up	2/144	0.897959	0.933149	0	0	0.515578	0.0554924	FOXC1;PPP1R12B
SB-222200 Up	2/144	0.897959	0.933149	0	0	0.515578	0.0554924	LRP1;TIMP2
JZL 184 Up	2/144	0.897959	0.933149	0	0	0.515578	0.0554924	IFIT1;SYNPO
VU 0364439 Up	2/144	0.897959	0.933149	0	0	0.515578	0.0554924	NF1;PTPN21
2-Bromophenethylamine Up	2/144	0.897959	0.933149	0	0	0.515578	0.0554924	DPH6;IGF1R
Lomitapide Up	2/144	0.897959	0.933149	0	0	0.515578	0.0554924	TPM1;FN1
Pentadecanoyl EA Down	2/145	0.900128	0.933149	0	0	0.511946	0.0538663	LRP1;USP18
BCATc-In2 Up	2/145	0.900128	0.933149	0	0	0.511946	0.0538663	LRP1;SSNA1
Tasimelteon Up	2/145	0.900128	0.933149	0	0	0.511946	0.0538663	SESTD1;PGLS
QX 314 Up	2/145	0.900128	0.933149	0	0	0.511946	0.0538663	PRRX2;PTGS1
NSC 87877 Down	2/145	0.900128	0.933149	0	0	0.511946	0.0538663	NPEPL1;MYADM
CHEMBL2041153 Up	2/145	0.900128	0.933149	0	0	0.511946	0.0538663	ATAD5;PRRX2
Atglistatin Up	2/145	0.900128	0.933149	0	0	0.511946	0.0538663	TPM2;S100A10
Terbinafine Up	2/145	0.900128	0.933149	0	0	0.511946	0.0538663	TPST2;ANTXR1
PAC-1 Down	2/145	0.900128	0.933149	0	0	0.511946	0.0538663	PRIM2;FTH1
Sultiame Up	2/145	0.900128	0.933149	0	0	0.511946	0.0538663	FN1;GLRX
Sultiame Down	2/145	0.900128	0.933149	0	0	0.511946	0.0538663	MED31;VPS13A
Perindopril Up	2/145	0.900128	0.933149	0	0	0.511946	0.0538663	GLRX;B2M
Pyrene Up	2/145	0.900128	0.933149	0	0	0.511946	0.0538663	PARP9;AGPAT1
Quinidine Down	2/145	0.900128	0.933149	0	0	0.511946	0.0538663	GPRC5A;COL14A1
A 967079 Up	2/145	0.900128	0.933149	0	0	0.511946	0.0538663	ACP6;NF1
Asarone Up	2/145	0.900128	0.933149	0	0	0.511946	0.0538663	COL1A2;BSG
Progesterone Down	2/145	0.900128	0.933149	0	0	0.511946	0.0538663	COL2A1;CALD1
AGN 190299 Up	2/146	0.902254	0.933149	0	0	0.508365	0.0522901	CRIP1;IGF1R
Isoproterenol Up	2/146	0.902254	0.933149	0	0	0.508365	0.0522901	ELF2;SORBS1
Zebularine Up	2/146	0.902254	0.933149	0	0	0.508365	0.0522901	GTF2A1;B2M
Mirabegron Up	2/146	0.902254	0.933149	0	0	0.508365	0.0522901	TGFB1I1;PRRX2
Dantrolene Down	2/146	0.902254	0.933149	0	0	0.508365	0.0522901	BSG;ADAT2
SB-269970 Up	2/146	0.902254	0.933149	0	0	0.508365	0.0522901	SLC11A2;GLRX
LUF-5735 Down	2/146	0.902254	0.933149	0	0	0.508365	0.0522901	PCBD2;ITM2C
RF9 Down	2/146	0.902254	0.933149	0	0	0.508365	0.0522901	CYB5A;IRGQ
Darunavir Up	2/146	0.902254	0.933149	0	0	0.508365	0.0522901	RPS19BP1;CALD1
Montelukast Up	2/146	0.902254	0.933149	0	0	0.508365	0.0522901	MED31;B2M
Indomethacin Down	2/146	0.902254	0.933149	0	0	0.508365	0.0522901	PON3;RCN1
NIBR189 Down	2/146	0.902254	0.933149	0	0	0.508365	0.0522901	PLCD1;ADAT2
Fluoxymesterone Down	2/146	0.902254	0.933149	0	0	0.508365	0.0522901	TGFB1I1;ANXA6
LY334370 Up	2/146	0.902254	0.933149	0	0	0.508365	0.0522901	CMC2;IL6ST
Atomoxetine Up	2/146	0.902254	0.933149	0	0	0.508365	0.0522901	FSTL1;CBR3
4,4-Dichlorobenzil Down	2/147	0.904338	0.933149	0	0	0.504833	0.0507621	USP18;CRLF1
PF 04447943 Up	2/147	0.904338	0.933149	0	0	0.504833	0.0507621	MED19;RAD9A
R-848 Up	2/147	0.904338	0.933149	0	0	0.504833	0.0507621	PRRX2;PLAUR
VUF11207 Down	2/147	0.904338	0.933149	0	0	0.504833	0.0507621	MPP2;SLC7A1
NSC19883 Up	2/147	0.904338	0.933149	0	0	0.504833	0.0507621	PGLS;RSL24D1
7,3,4-THIF Down	2/147	0.904338	0.933149	0	0	0.504833	0.0507621	FTH1;PARP9
RO495 Down	2/147	0.904338	0.933149	0	0	0.504833	0.0507621	CSPG4;GLG1
Clozapine Down	2/147	0.904338	0.933149	0	0	0.504833	0.0507621	ECHS1;ABAT
HC 030031 Up	2/147	0.904338	0.933149	0	0	0.504833	0.0507621	JAK2;IRF9
GNF-5 Down	2/147	0.904338	0.933149	0	0	0.504833	0.0507621	ARHGEF40;B2M
BAY 57-1293 Up	2/147	0.904338	0.933149	0	0	0.504833	0.0507621	PLAUR;NDRG1
Zafirlukast Down	2/147	0.904338	0.933149	0	0	0.504833	0.0507621	CD81;PLAUR
Ursodiol Down	2/147	0.904338	0.933149	0	0	0.504833	0.0507621	CALD1;FN1
GSK189254A Up	2/147	0.904338	0.933149	0	0	0.504833	0.0507621	FARP2;FN1
Tadalafil Down	2/147	0.904338	0.933149	0	0	0.504833	0.0507621	COL14A1;S100A10
HFI-142 Down	2/148	0.90638	0.933149	0	0	0.501349	0.0492808	PLCD1;RAD9A
JTE 013 Down	2/148	0.90638	0.933149	0	0	0.501349	0.0492808	FN1;MYL9
NU 7026 Up	2/148	0.90638	0.933149	0	0	0.501349	0.0492808	ISYNA1;PLCB1
TMN 355 Up	2/148	0.90638	0.933149	0	0	0.501349	0.0492808	JAK2;OSMR
R121919 Down	2/148	0.90638	0.933149	0	0	0.501349	0.0492808	TOR3A;MMP14
Toceranib Down	2/148	0.90638	0.933149	0	0	0.501349	0.0492808	RRM2;NES
A 438079 Up	2/148	0.90638	0.933149	0	0	0.501349	0.0492808	FN1;PLCD1
MRE-269 Down	2/148	0.90638	0.933149	0	0	0.501349	0.0492808	COL14A1;GLRX
Rifaximin Up	2/149	0.908382	0.933555	0	0	0.497913	0.0478447	POLR3H;MYL9
WAY 316606 Up	2/149	0.908382	0.933555	0	0	0.497913	0.0478447	IL6ST;B2M
LY334370 Down	2/149	0.908382	0.933555	0	0	0.497913	0.0478447	CCNT1;RPS19BP1
Paliperidone Up	2/150	0.910343	0.93502	0	0	0.494523	0.0464523	DTX3L;CPE
Nolatrexed Down	1/135	0.973696	0.981988	0	0	0.272776	0.00727105	DPH6
Fingolimod Down	1/142	0.978233	0.981988	0	0	0.25914	0.00570303	DAP
PF-04620110 Up	1/142	0.978233	0.981988	0	0	0.25914	0.00570303	DNPEP
3-Benzyloxyaniline Up	1/143	0.978814	0.981988	0	0	0.257302	0.00550983	GLO1
Alogliptin Up	1/143	0.978814	0.981988	0	0	0.257302	0.00550983	ARHGEF40
STL321288 Down	1/143	0.978814	0.981988	0	0	0.257302	0.00550983	HAUS1
Lalistat1 Down	1/143	0.978814	0.981988	0	0	0.257302	0.00550983	TGFBR3
Uridine Up	1/143	0.978814	0.981988	0	0	0.257302	0.00550983	NF1
AR-C155858 Up	1/143	0.978814	0.981988	0	0	0.257302	0.00550983	FN1
ML349 Up	1/143	0.978814	0.981988	0	0	0.257302	0.00550983	NRP1
Dinoprost Up	1/143	0.978814	0.981988	0	0	0.257302	0.00550983	TPM1
Necrostatin 2 Up	1/144	0.979379	0.981988	0	0	0.255489	0.00532347	PARP9
BLZ-945 Down	1/144	0.979379	0.981988	0	0	0.255489	0.00532347	APPBP2
MLN 8237 Down	1/144	0.979379	0.981988	0	0	0.255489	0.00532347	HELLS
BBL023172 Up	1/144	0.979379	0.981988	0	0	0.255489	0.00532347	SLC11A2
TCS-OX2-29 Up	1/144	0.979379	0.981988	0	0	0.255489	0.00532347	PON3
Topiramate Up	1/144	0.979379	0.981988	0	0	0.255489	0.00532347	FN1
5-R-Rivaroxaban Down	1/144	0.979379	0.981988	0	0	0.255489	0.00532347	FHL1
BHT Up	1/144	0.979379	0.981988	0	0	0.255489	0.00532347	FN1
Cytosporone B Up	1/145	0.97993	0.981988	0	0	0.253702	0.00514371	PCBD2
Ethiprole Down	1/145	0.97993	0.981988	0	0	0.253702	0.00514371	PPP1R12B
BRL 54443 Up	1/145	0.97993	0.981988	0	0	0.253702	0.00514371	EPHB3
Succinobucol Down	1/145	0.97993	0.981988	0	0	0.253702	0.00514371	LMOD1
L-Cysteine Up	1/146	0.980465	0.981988	0	0	0.251939	0.00497028	ATG101
NSC735380 Down	1/146	0.980465	0.981988	0	0	0.251939	0.00497028	RSL24D1
L-168,049 Up	1/146	0.980465	0.981988	0	0	0.251939	0.00497028	COL1A1
Ospemifene Down	1/146	0.980465	0.981988	0	0	0.251939	0.00497028	XDH
NSC95682 Up	1/146	0.980465	0.981988	0	0	0.251939	0.00497028	MICAL2
4-Benzylpyridine Down	1/146	0.980465	0.981988	0	0	0.251939	0.00497028	FKBP7
INT-747 Up	1/146	0.980465	0.981988	0	0	0.251939	0.00497028	XDH
CID-2745687 Up	1/147	0.980987	0.981988	0	0	0.250201	0.00480296	ELOF1
Huperzine A Up	1/147	0.980987	0.981988	0	0	0.250201	0.00480296	ADAT2
Mildronate Up	1/147	0.980987	0.981988	0	0	0.250201	0.00480296	RAD9A
Benzbromarone Down	1/147	0.980987	0.981988	0	0	0.250201	0.00480296	CBR3
Erythromycin Up	1/147	0.980987	0.981988	0	0	0.250201	0.00480296	RASSF1
Zosuquidar Down	1/147	0.980987	0.981988	0	0	0.250201	0.00480296	COL14A1
NU7441 Down	1/147	0.980987	0.981988	0	0	0.250201	0.00480296	TFRC
Octreotide Down	1/147	0.980987	0.981988	0	0	0.250201	0.00480296	LMO4
DPP-IV-IN-2 Down	1/147	0.980987	0.981988	0	0	0.250201	0.00480296	NRP1
Sulcotrione Up	1/147	0.980987	0.981988	0	0	0.250201	0.00480296	TGFBR3
Lomitapide Down	1/147	0.980987	0.981988	0	0	0.250201	0.00480296	DAP
MRS 1754 Down	1/148	0.981494	0.981988	0	0	0.248486	0.00464152	FARP1
ML221 Down	1/148	0.981494	0.981988	0	0	0.248486	0.00464152	FTH1
2-PMPA Down	1/148	0.981494	0.981988	0	0	0.248486	0.00464152	DAP
Paricalcitol Down	1/149	0.981988	0.981988	0	0	0.246794	0.00448573	NRP1
Tacrolimus Down	1/149	0.981988	0.981988	0	0	0.246794	0.00448573	BCS1L
