# Supplementary material for: Ezrin defines TSC complex activation at endosomal compartments through EGFR–AKT signaling
Source: eLife. 2025 Feb 12;13:RP98523. doi: 10.7554/eLife.98523 (PMC11820125; doi:10.7554/eLife.98523)
Supplement: Supplementary file 5. [file elife-98523-supp5.xlsx]

## Sheet: genemania-network
# Organism: H. sapiens
# Application version: 3.6.0
# Database version: 13 August 2021 00:00:00
# Network generated on: 21 September 2023
# Author: GeneMANIA (genemania.org)
# Notes: Network weight reflects the data source relevance for predicting the function of interest
Entity 1	Entity 2	Weight	Network group	Network
EZR	SLC12A2	1	Physical Interactions	IREF-dip
ISG15	PGD	0.0845154	Physical Interactions	Zhao-Krug-2005
ISG15	EZR	0.0845154	Physical Interactions	Zhao-Krug-2005
BAG3	EZR	0.0760286	Physical Interactions	Chen-Ge-2013 B
ISG15	BAG3	0.0760286	Physical Interactions	Chen-Ge-2013 B
EZR	RIPK2	0.0850914	Physical Interactions	Ewing-Figeys-2007
EGFR	OAT	0.0558146	Physical Interactions	Tong-Moran-2014
EGFR	SLC12A2	0.0558146	Physical Interactions	Tong-Moran-2014
ISYNA1	PGD	0.0373887	Physical Interactions	Wan-Emili-2015
EZR	RCN1	0.0298072	Physical Interactions	Wan-Emili-2015
EZR	OAT	0.0306925	Physical Interactions	Wan-Emili-2015
EZR	PGD	0.0307223	Physical Interactions	Wan-Emili-2015
EZR	ISYNA1	0.019669	Physical Interactions	Wan-Emili-2015
EZR	SLC9A3R1	0.114795	Physical Interactions	Wan-Emili-2015
EZR	SLC12A2	0.23991	Physical Interactions	IREF-matrixdb
EZR	SLC9A3R1	0.0818806	Physical Interactions	IREF-matrixdb
EZR	RIPK2	0.0503087	Physical Interactions	IREF-matrixdb
EGFR	EZR	0.00183028	Physical Interactions	IREF-matrixdb
EGFR	FN1	0.00153448	Physical Interactions	IREF-matrixdb
EZR	PGAM5	0.0667572	Physical Interactions	Liu-Varjosalo-2018
FN1	PGAM5	0.04377	Physical Interactions	Humphries-Humphries-2009
FN1	EZR	0.04377	Physical Interactions	Humphries-Humphries-2009
SLC9A3R1	MME	0.00508493	Physical Interactions	IREF-SMALL-SCALE-STUDIES
EZR	PALLD	0.0540267	Physical Interactions	IREF-SMALL-SCALE-STUDIES
EZR	SLC12A2	0.0665382	Physical Interactions	IREF-SMALL-SCALE-STUDIES
EZR	ARHGDIB	0.038583	Physical Interactions	IREF-SMALL-SCALE-STUDIES
EZR	SLC9A3R1	0.00620627	Physical Interactions	IREF-SMALL-SCALE-STUDIES
EZR	FAS	0.0116527	Physical Interactions	IREF-SMALL-SCALE-STUDIES
VCAM1	EZR	0.0264785	Physical Interactions	IREF-SMALL-SCALE-STUDIES
EGFR	SLC9A3R1	0.00126254	Physical Interactions	IREF-SMALL-SCALE-STUDIES
EGFR	FAS	0.00237051	Physical Interactions	IREF-SMALL-SCALE-STUDIES
EGFR	EZR	0.00141183	Physical Interactions	IREF-SMALL-SCALE-STUDIES
EGFR	FN1	0.00101807	Physical Interactions	IREF-SMALL-SCALE-STUDIES
EZR	SLC9A3R1	0.0238117	Physical Interactions	IREF-quickgo
VCAM1	EZR	0.139734	Physical Interactions	IREF-quickgo
ISG15	BAG3	0.0600842	Physical Interactions	Chen-Ge-2013 A
PGD	OAT	0.0198664	Physical Interactions	Moutaoufik-Babu-2019
ISG15	PGD	0.121206	Physical Interactions	IREF-innatedb
ISG15	EZR	0.0146615	Physical Interactions	IREF-innatedb
EGFR	EZR	0.0311234	Physical Interactions	Petschnigg-Stagljar-2014
SLC9A3R1	MME	0.00665661	Physical Interactions	BIOGRID-SMALL-SCALE-STUDIES
EZR	PALLD	0.0745798	Physical Interactions	BIOGRID-SMALL-SCALE-STUDIES
EZR	MME	0.00586127	Physical Interactions	BIOGRID-SMALL-SCALE-STUDIES
EZR	SLC9A3R1	0.0108471	Physical Interactions	BIOGRID-SMALL-SCALE-STUDIES
EZR	FAS	0.0127907	Physical Interactions	BIOGRID-SMALL-SCALE-STUDIES
VCAM1	EZR	0.0280215	Physical Interactions	BIOGRID-SMALL-SCALE-STUDIES
EGFR	FN1	0.0011974	Physical Interactions	BIOGRID-SMALL-SCALE-STUDIES
